# Supplementary material for: Spin relaxation in antiferromagnetic Fe–Fe dimers slowed down by anisotropic DyIII ions
Source: publisher site journal article supplement (doi:10.3762/bjnano.4.92), 2013-11-27
Supplement: Additional file 1 [file FKFe4Y2_checkCIF.pdf › FKFe4Y2_checkCIF.pdf]

## checkCIF/PLATON report (basic structural check)

No syntax errors found.  
Please wait while processing ....

CIF dictionary  
Interpreting this report

## Datablock: FKFe4Y2

|                                |                                         |                                  |
|--------------------------------|-----------------------------------------|----------------------------------|
| Bond precision:                | C-C = 0.0065 Å                          | Wavelength=0.71073               |
| Cell:                          | a=19.1485(18) b=16.4725(10) c=24.797(2) |                                  |
|                                | alpha=90 beta=101.162(11) gamma=90      |                                  |
| Temperature: 200 K             |                                         |                                  |
|                                | Calculated                              | Reported                         |
| Volume                         | 7673.6(11)                              | 7673.5(11)                       |
| Space group                    | P 21/c                                  | P 21/c                           |
| Hall group                     | -P 2ybc                                 | -P 2ybc                          |
| Moiety formula                 | C50 H100 Fe4 N10 O22 Y2, C6 H6 O        | C50 H100 Fe4 N10 O22 Y2, C6 H6 O |
| Sum formula                    | C56 H106 Fe4 N10 O23 Y2                 | C56 H106 Fe4 N10 O23 Y2          |
| Mr                             | 1688.73                                 | 1688.72                          |
| Dx, g cm <sup>-3</sup>         | 1.462                                   | 1.462                            |
| Z                              | 4                                       | 4                                |
| Mu (mm <sup>-1</sup> )         | 2.305                                   | 2.305                            |
| F000                           | 3512.0                                  | 3512.0                           |
| F000'                          | 3496.57                                 |                                  |
| h,k,lmax                       | 23,20,30                                | 23,20,30                         |
| Nref                           | 15295                                   | 15075                            |
| Tmin,Tmax                      | 0.530,0.616                             | 0.557,0.671                      |
| Tmin'                          | 0.519                                   |                                  |
| Correction method= MULTI-SCAN  |                                         |                                  |
| Data completeness= 0.986       | Theta(max)= 26.122                      |                                  |
| R(reflections)= 0.0416( 11528) | wR2(reflections)= 0.1073( 15075)        |                                  |
| S = 0.986                      | Npar= 917                               |                                  |

The following ALERTS were generated. Each ALERT has the format

**test-name\_ALERT\_alert-type\_alert-level.**

Click on the hyperlinks for more details of the test.

### ●Alert level B

Crystal system given = monoclinic

|                   |                                                |           |
|-------------------|------------------------------------------------|-----------|
| PLAT201_ALERT_2_B | Isotropic non-H Atoms in Main Residue(s) ..... | 6         |
| PLAT220_ALERT_2_B | Large Non-Solvent C Ueq(max)/Ueq(min) ...      | 4.2 Ratio |
| PLAT222_ALERT_3_B | Large Non-Solvent H Uiso(max)/Uiso(min) ..     | 7.4 Ratio |

### ●Alert level C

|                                   |                                                  |             |
|-----------------------------------|--------------------------------------------------|-------------|
| PLAT213_ALERT_2_C                 | Atom C39 has ADP max/min Ratio .....             | 3.3 prola   |
| PLAT220_ALERT_2_C                 | Large Non-Solvent N Ueq(max)/Ueq(min) ...        | 3.1 Ratio   |
| PLAT241_ALERT_2_C                 | Check High Ueq as Compared to Neighbors for      | C13         |
| PLAT242_ALERT_2_C                 | Check Low Ueq as Compared to Neighbors for       | N3          |
| <b>And 6 other PLAT242 Alerts</b> |                                                  |             |
| More ...                          |                                                  |             |
| PLAT250_ALERT_2_C                 | Large U3/U1 Ratio for Average U(i,j) Tensor .... | 2.5         |
| PLAT341_ALERT_3_C                 | Low Bond Precision on C-C Bonds .....            | 0.0065 Ang. |
| PLAT415_ALERT_2_C                 | Short Inter D-H...H-X H44C .. H61B ..            | 2.13 Ang.   |
| PLAT601_ALERT_2_C                 | Structure Contains Solvent Accessible VOIDS of . | 34 Ang3     |

### ●Alert level G

|                                   |                                                  |           |
|-----------------------------------|--------------------------------------------------|-----------|
| PLAT002_ALERT_2_G                 | Number of Distance or Angle Restraints on AtSite | 22        |
| PLAT003_ALERT_2_G                 | Number of Uiso or Uij Restrained non-H Atoms ... | 23        |
| PLAT005_ALERT_5_G                 | No _iucr_refine_instructions_details in the CIF  | ? Do !    |
| PLAT007_ALERT_5_G                 | Note: Number of Unrefined Donor-H Atoms .....    | 2         |
| PLAT244_ALERT_4_G                 | Low 'Solvent' Ueq as Compared to Neighbors of    | C61B      |
| PLAT301_ALERT_3_G                 | Note: Main Residue Disorder .....                | 10 %      |
| PLAT302_ALERT_4_G                 | Note: Anion/Solvent Disorder .....               | 100 %     |
| PLAT720_ALERT_4_G                 | Number of Unusual/Non-Standard Labels .....      | 8         |
| PLAT774_ALERT_1_G                 | Suspect X-Y Bond in CIF: Y1 -- Y2 ..             | 3.86 Ang. |
| PLAT793_ALERT_4_G                 | The Model has Chirality at N2 (Verify) ....      | R         |
| <b>And 2 other PLAT793 Alerts</b> |                                                  |           |
| More ...                          |                                                  |           |
| PLAT811_ALERT_5_G                 | No ADDSYM Analysis: Too Many Excluded Atoms .... | ! Info    |
| PLAT860_ALERT_3_G                 | Note: Number of Least-Squares Restraints .....   | 97        |

- 0 **ALERT level A** = Most likely a serious problem - resolve or explain  
3 **ALERT level B** = A potentially serious problem, consider carefully  
14 **ALERT level C** = Check. Ensure it is not caused by an omission or oversight  
14 **ALERT level G** = General information/check it is not something unexpected

- 1 ALERT type 1 CIF construction/syntax error, inconsistent or missing data  
17 ALERT type 2 Indicator that the structure model may be wrong or deficient  
4 ALERT type 3 Indicator that the structure quality may be low  
6 ALERT type 4 Improvement, methodology, query or suggestion  
3 ALERT type 5 Informative message, check

It is advisable to attempt to resolve as many as possible of the alerts in all categories.

Often the minor alerts point to easily fixed oversights, errors and omissions in your CIF or refinement strategy, so attention to these fine details can be worthwhile. In order to resolve some of the more serious problems it may be necessary to carry out additional measurements or structure refinements. However, the purpose of your study may justify the reported deviations and the more serious of these should normally be commented upon in the discussion or experimental section of a paper or in the "special\_details" fields of the CIF. checkCIF was carefully designed to identify outliers and unusual parameters, but every test has its limitations and alerts that are not important in a particular case may appear. Conversely, the absence of alerts does not guarantee there are no aspects of the results needing attention. It is up to the individual to critically assess their own results and, if necessary, seek expert advice.

#### Publication of your CIF in IUCr journals

A basic structural check has been run on your CIF. These basic checks will be run on all CIFs submitted for publication in IUCr journals (*Acta Crystallographica*, *Journal of Applied Crystallography*, *Journal of Synchrotron Radiation*); however, if you intend to submit to *Acta Crystallographica Section C* or *E*, you should make sure that [full publication checks](#) are run on the final version of your CIF prior to submission.

#### Publication of your CIF in other journals

Please refer to the *Notes for Authors* of the relevant journal for any special instructions relating to CIF submission.

---

PLATON version of 01/06/2013; check.def file version of 24/05/2013

### Datablock FKFe4Y2 - ellipsoid plot

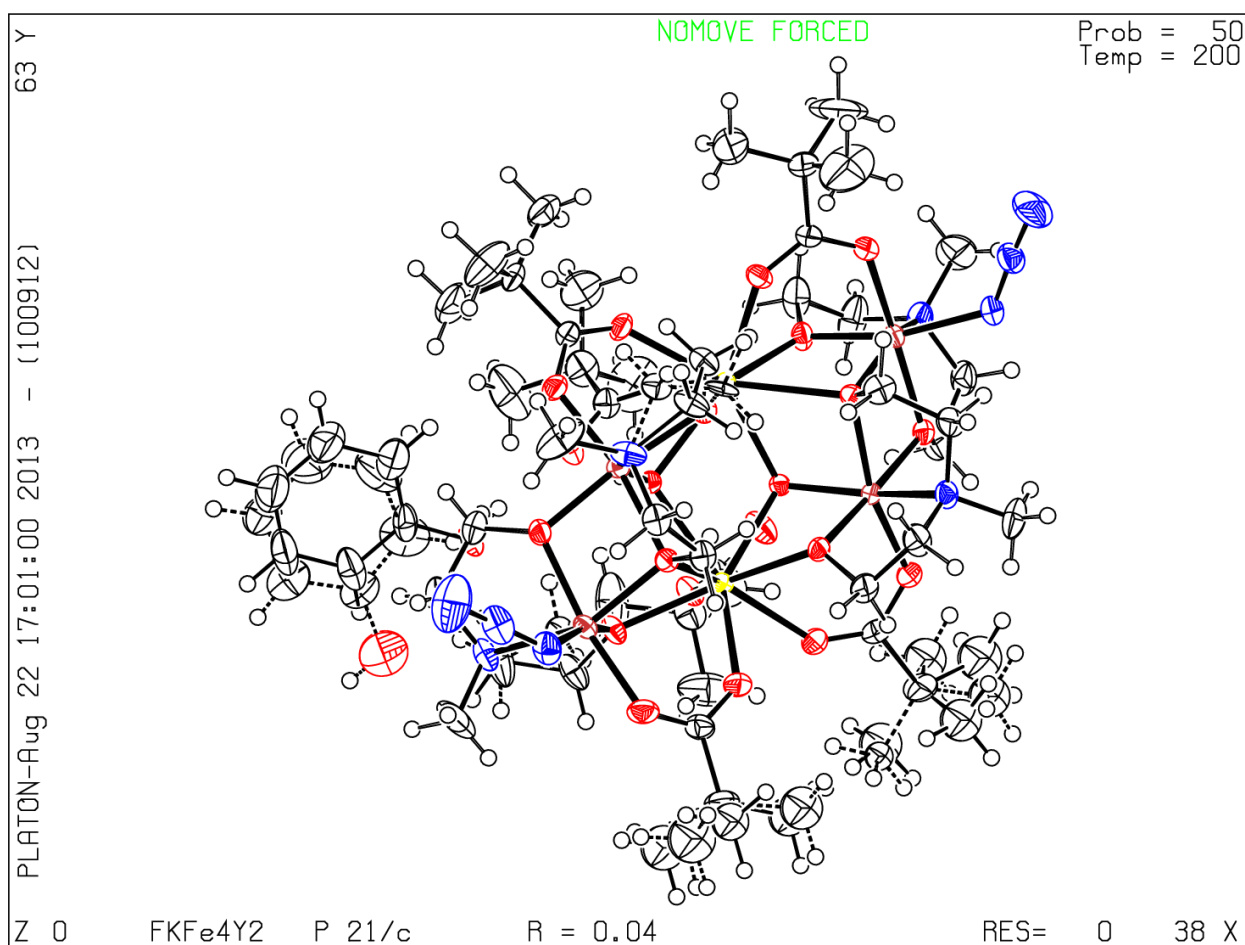

---

[Download CIF editor \(pubCIF\) from the IUCr](#)  
[Download CIF editor \(enCIFer\) from the CCDC](#)  
[Test a new CIF entry](#)
