# Supplementary material for: Spin relaxation in antiferromagnetic Fe–Fe dimers slowed down by anisotropic DyIII ions
Source: publisher site journal article supplement (doi:10.3762/bjnano.4.92), 2013-11-27
Supplement: Additional file 1 [file L618_checkCIF.pdf › L618_checkCIF.pdf]

## checkCIF/PLATON report (basic structural check)

No syntax errors found.  
Please wait while processing ....

CIF dictionary  
Interpreting this report

### Datablock: L618

|                    |                                                |                                      |
|--------------------|------------------------------------------------|--------------------------------------|
| Bond precision:    | C-C = 0.0080 A                                 | Wavelength=0.71073                   |
| Cell:              | a=13.9237(6) b=14.5196(7) c=25.1289(10)        |                                      |
|                    | alpha=82.856(3) beta=79.710(3) gamma=65.545(3) |                                      |
| Temperature: 150 K |                                                |                                      |
|                    | Calculated                                     | Reported                             |
| Volume             | 4542.9(4)                                      | 4542.9(4)                            |
| Space group        | P -1                                           | P -1                                 |
| Hall group         | -P 1                                           | -P 1                                 |
| Moiety formula     | C62 H124 Dy2 Fe4 N10 O22, 2(C2 H3 N), C2 N     | C62 H124 Dy2 Fe4 N10 O22, 3(C2 H3 N) |
| Sum formula        | C68 H130 Dy2 Fe4 N13 O22                       | C68 H133 Dy2 Fe4 N13 O22             |
| Mr                 | 2030.26                                        | 2033.27                              |
| Dx, g cm-3         | 1.484                                          | 1.486                                |
| Z                  | 2                                              | 2                                    |
| Mu (mm-1)          | 2.315                                          | 2.315                                |
| F000               | 2082.0                                         | 2088.0                               |
| F000'              | 2084.74                                        |                                      |
| h,k,lmax           | 18,19,33                                       | 18,19,33                             |
| Nref               | 21843                                          | 21679                                |
| Tmin,Tmax          | 0.481,0.615                                    | 0.472,0.610                          |
| Tmin'              | 0.472                                          |                                      |
| Correction method= | MULTI-SCAN                                     |                                      |
| Data completeness= | 0.992                                          | Theta(max)= 27.950                   |
| R(reflections)=    | 0.0449( 17985)                                 | wR2(reflections)= 0.1201( 21679)     |
| S =                | 1.018                                          | Npar= 979                            |

The following ALERTS were generated. Each ALERT has the format

**test-name\_ALERT\_alert-type\_alert-level.**

Click on the hyperlinks for more details of the test.

#### ●Alert level B

Crystal system given = triclinic

|                   |                                                |           |
|-------------------|------------------------------------------------|-----------|
| PLAT201_ALERT_2_B | Isotropic non-H Atoms in Main Residue(s) ..... | 1         |
| PLAT220_ALERT_2_B | Large Non-Solvent C Ueq(max)/Ueq(min) ...      | 4.5 Ratio |
| PLAT413_ALERT_2_B | Short Inter XH3 .. XHn H57D .. H74A ..         | 2.07 Ang. |

#### ●Alert level C

|                   |                                                  |           |
|-------------------|--------------------------------------------------|-----------|
| PLAT041_ALERT_1_C | Calc. and Reported SumFormula Strings Differ     | ? Check   |
| PLAT068_ALERT_1_C | Reported F000 Differs from Calcd (or Missing)... | ? Check   |
| PLAT202_ALERT_3_C | Isotropic non-H Atoms in Anion/Solvent .....     | 3         |
| PLAT213_ALERT_2_C | Atom C47 has ADP max/min Ratio .....             | 3.4 prola |
| PLAT222_ALERT_3_C | Large Non-Solvent H Uiso(max)/Uiso(min) ..       | 6.1 Ratio |
| PLAT242_ALERT_2_C | Check Low Ueq as Compared to Neighbors for       | C34       |

**And 5 other PLAT242 Alerts**

More ...

|                   |                                               |     |
|-------------------|-----------------------------------------------|-----|
| PLAT244_ALERT_4_C | Low 'Solvent' Ueq as Compared to Neighbors of | C71 |
| PLAT244_ALERT_4_C | Low 'Solvent' Ueq as Compared to Neighbors of | C73 |

#### ●Alert level G

FORMU01\_ALERT\_2\_G There is a discrepancy between the atom counts in the \_chemical\_formula\_sum and the formula from the \_atom\_site\* data.  
Atom count from \_chemical\_formula\_sum: C68 H133 Dy2 Fe4 N13 O22  
Atom count from the \_atom\_site data: C68 H130 Dy2 Fe4 N13 O22  
CELLZ01\_ALERT\_1\_G Difference between formula and atom\_site contents detected.  
CELLZ01\_ALERT\_1\_G WARNING: H atoms missing from atom site list. Is this intentional?  
From the CIF: \_cell\_formula\_units\_Z 2  
From the CIF: \_chemical\_formula\_sum C68 H133 Dy2 Fe4 N13 O22  
TEST: Compare cell contents of formula and atom\_site data

| atom | Z*formula | cif sites | diff |
|------|-----------|-----------|------|
| C    | 136.00    | 136.00    | 0.00 |
| H    | 266.00    | 260.00    | 6.00 |
| Dy   | 4.00      | 4.00      | 0.00 |
| Fe   | 8.00      | 8.00      | 0.00 |
| N    | 26.00     | 26.00     | 0.00 |
| O    | 44.00     | 44.00     | 0.00 |

|                   |                                                  |              |
|-------------------|--------------------------------------------------|--------------|
| PLAT002_ALERT_2_G | Number of Distance or Angle Restraints on AtSite | 23           |
| PLAT005_ALERT_5_G | No _iucr_refine_instructions_details in the CIF  | ? Do !       |
| PLAT042_ALERT_1_G | Calc. and Reported MoietyFormula Strings Differ  | ? Check      |
| PLAT154_ALERT_1_G | The su's on the Cell Angles are Equal .....      | 0.00300 Deg. |
| PLAT301_ALERT_3_G | Note: Main Residue Disorder .....                | 3 %          |
| PLAT302_ALERT_4_G | Note: Anion/Solvent Disorder .....               | 33 %         |
| PLAT793_ALERT_4_G | The Model has Chirality at N1 (Verify) ....      | R            |

**And 3 other PLAT793 Alerts**

More ...

|                   |                                                |    |
|-------------------|------------------------------------------------|----|
| PLAT860_ALERT_3_G | Note: Number of Least-Squares Restraints ..... | 50 |
|-------------------|------------------------------------------------|----|

0 **ALERT level A** = Most likely a serious problem - resolve or explain  
 3 **ALERT level B** = A potentially serious problem, consider carefully  
 13 **ALERT level C** = Check. Ensure it is not caused by an omission or oversight  
 14 **ALERT level G** = General information/check it is not something unexpected

6 ALERT type 1 CIF construction/syntax error, inconsistent or missing data  
 12 ALERT type 2 Indicator that the structure model may be wrong or deficient  
 4 ALERT type 3 Indicator that the structure quality may be low  
 7 ALERT type 4 Improvement, methodology, query or suggestion  
 1 ALERT type 5 Informative message, check

It is advisable to attempt to resolve as many as possible of the alerts in all categories. Often the minor alerts point to easily fixed oversights, errors and omissions in your CIF or refinement strategy, so attention to these fine details can be worthwhile. In order to resolve some of the more serious problems it may be necessary to carry out additional measurements or structure refinements. However, the purpose of your study may justify the reported deviations and the more serious of these should normally be commented upon in the discussion or experimental section of a paper or in the "special\_details" fields of the CIF. checkCIF was carefully designed to identify outliers and unusual parameters, but every test has its limitations and alerts that are not important in a particular case may appear. Conversely, the absence of alerts does not guarantee there are no aspects of the results needing attention. It is up to the individual to critically assess their own results and, if necessary, seek expert advice.

#### Publication of your CIF in IUCr journals

A basic structural check has been run on your CIF. These basic checks will be run on all CIFs submitted for publication in IUCr journals (*Acta Crystallographica*, *Journal of Applied Crystallography*, *Journal of Synchrotron Radiation*); however, if you intend to submit to *Acta Crystallographica Section C* or *E*, you should make sure that [full publication checks](#) are run on the final version of your CIF prior to submission.

#### Publication of your CIF in other journals

Please refer to the *Notes for Authors* of the relevant journal for any special instructions relating to CIF submission.

PLATON version of 01/06/2013; check.def file version of 24/05/2013

### Datablock L618 - ellipsoid plot

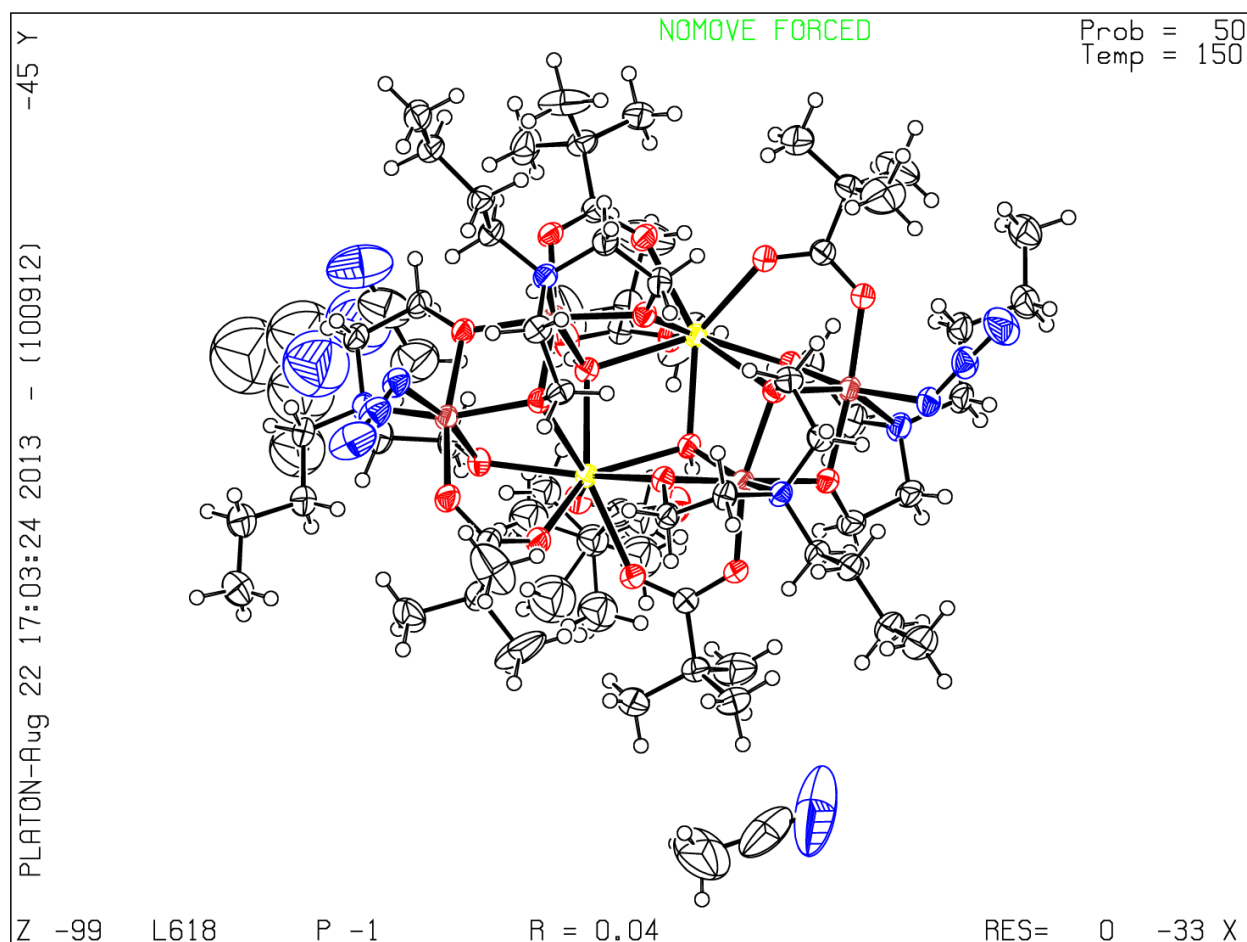

[Test a new CIF entry](#)
