# Supplementary material for: Spin relaxation in antiferromagnetic Fe–Fe dimers slowed down by anisotropic DyIII ions
Source: Beilstein J Nanotechnol. 2013 Nov 27;4:807–14. doi: 10.3762/bjnano.4.92 (PMC3869222; doi:10.3762/bjnano.4.92)
Supplement: File 1 — CIF files for the crystal structures of 1 and 2. [file Beilstein_J_Nanotechnol-04-807-s001.zip]

Archive with 4 entries (4 files):
- L618.cif
- L618_checkCIF.pdf
- FKFe4Y2.cif
- FKFe4Y2_checkCIF.pdf
