# Supplementary material for: Spin relaxation in antiferromagnetic Fe–Fe dimers slowed down by anisotropic DyIII ions
Source: Beilstein J Nanotechnol. 2013 Nov 27;4:807–14. doi: 10.3762/bjnano.4.92 (PMC3869222; doi:10.3762/bjnano.4.92)
Supplement: File 1 — CIF files for the crystal structures of 1 and 2. [file Beilstein_J_Nanotechnol-04-807-s001.zip › FKFe4Y2.cif]

_publ_contact_author
; 
'Annie K. Powell'
;
_publ_contact_author_email        annie.powell@kit.edu
_publ_contact_author_phone        '+49 721 608 42135'
_publ_requested_journal           'Beilstein Journal of Nanotechnology'
_publ_section_title
; 
Spin relaxation in a Fe-Fe antiferromagnetic dimer slowed down 
by anisotropic Dy ions
;
loop_
_publ_author_name
_publ_author_address
    'Valeriu Mereacre'
; Institut f\"ur Anorganische Chemie
  Karlsruhe Institute of Technology
  Engesserstr. 15
  D-76131 Karlsruhe
  Germany
;
    'Frederik Kloewer'
; Institut f\"ur Anorganische Chemie
  Karlsruhe Institute of Technology
  Engesserstr. 15
  D-76131 Karlsruhe
  Germany
;
    'Rodolphe Clerac'
; Centre de Recherche Paul Pascal
  CNRS UPR 8641
  Avenue Dr. A. Schweitzer
  33600 Pessac
  France
;
    'Christopher E. Anson'
; Institut f\"ur Anorganische Chemie
  Karlsruhe Institute of Technology
  Engesserstr. 15
  D-76131 Karlsruhe
  Germany
;
    'Annie K. Powell'
; Institut f\"ur Anorganische Chemie
  Karlsruhe Institute of Technology
  Engesserstr. 15
  D-76131 Karlsruhe
  Germany
;
 
data_FKFe4Y2
 
_audit_creation_method            SHELXL-2013
_chemical_name_systematic
;
 ?
;
_chemical_name_common             ?
_chemical_melting_point           ?
_chemical_formula_moiety          
 'C50 H100 Fe4 N10 O22 Y2, C6 H6 O'
_chemical_formula_sum
 'C56 H106 Fe4 N10 O23 Y2' 
_chemical_formula_weight          1688.72

loop_
 _atom_type_symbol
 _atom_type_description
 _atom_type_scat_dispersion_real
 _atom_type_scat_dispersion_imag
 _atom_type_scat_source
 'C'  'C'   0.0033   0.0016
 'International Tables Vol C Tables 4.2.6.8 and 6.1.1.4'
 'H'  'H'   0.0000   0.0000
 'International Tables Vol C Tables 4.2.6.8 and 6.1.1.4'
 'N'  'N'   0.0061   0.0033
 'International Tables Vol C Tables 4.2.6.8 and 6.1.1.4'
 'O'  'O'   0.0106   0.0060
 'International Tables Vol C Tables 4.2.6.8 and 6.1.1.4'
 'Fe'  'Fe'   0.3463   0.8444
 'International Tables Vol C Tables 4.2.6.8 and 6.1.1.4'
 'Y'  'Y'  -2.7962   3.5667
 'International Tables Vol C Tables 4.2.6.8 and 6.1.1.4'
 
_space_group_crystal_system       monoclinic
_space_group_IT_number            14
_space_group_name_H-M_alt         'P 21/c'
_space_group_name_Hall            '-P 2ybc'
 
_shelx_space_group_comment
;
The symmetry employed for this shelxl refinement is uniquely defined
by the following loop, which should always be used as a source of
symmetry information in preference to the above space-group names.
They are only intended as comments.
;
 
loop_
 _space_group_symop_operation_xyz
 'x, y, z'
 '-x, y+1/2, -z+1/2'
 '-x, -y, -z'
 'x, -y-1/2, z-1/2'
 
_cell_length_a                    19.1485(18)
_cell_length_b                    16.4725(10)
_cell_length_c                    24.797(2)
_cell_angle_alpha                 90
_cell_angle_beta                  101.162(11)
_cell_angle_gamma                 90
_cell_volume                      7673.5(11)
_cell_formula_units_Z             4
_cell_measurement_temperature     200(2)
_cell_measurement_reflns_used     7997 
_cell_measurement_theta_min       2.47 
_cell_measurement_theta_max       26.01 
 
_exptl_crystal_description        block 
_exptl_crystal_colour             orange 
_exptl_crystal_density_meas       ? 
_exptl_crystal_density_method     ?              
_exptl_crystal_density_diffrn     1.462          
_exptl_crystal_F_000              3512
_exptl_transmission_factor_min    ?                                             
_exptl_transmission_factor_max    ?                                             
_exptl_crystal_size_max           0.280
_exptl_crystal_size_mid           0.240
_exptl_crystal_size_min           0.210
_exptl_absorpt_coefficient_mu     2.305
_shelx_estimated_absorpt_T_min    0.565
_shelx_estimated_absorpt_T_max    0.643
_exptl_absorpt_correction_type    multi-scan 
_exptl_absorpt_correction_T_min   0.557 
_exptl_absorpt_correction_T_max   0.671 
_exptl_absorpt_process_details    
;
XPREP in SHELXTL 6.14 (BrukerAXS Inc., 2003)
; 
 
_exptl_special_details
;
 ?
;
 
_diffrn_ambient_temperature       200(2)
_diffrn_radiation_wavelength      0.71073
_diffrn_radiation_type            MoK\a
_diffrn_source                    'fine-focus sealed tube'                       
_diffrn_measurement_device_type   'Stoe IPDS' 
_diffrn_measurement_method        'area detector, \w-scans' 
_diffrn_detector_area_resol_mean  6.667 
_diffrn_reflns_number             82403
_diffrn_reflns_av_unetI/netI      0.0413
_diffrn_reflns_av_R_equivalents   0.0635
_diffrn_reflns_limit_h_min        -23
_diffrn_reflns_limit_h_max        23
_diffrn_reflns_limit_k_min        -20
_diffrn_reflns_limit_k_max        20
_diffrn_reflns_limit_l_min        -30
_diffrn_reflns_limit_l_max        30
_diffrn_reflns_theta_min          2.473
_diffrn_reflns_theta_max          26.122
_diffrn_reflns_theta_full         25.250
_diffrn_measured_fraction_theta_max   0.986
_diffrn_measured_fraction_theta_full  0.995
_diffrn_reflns_Laue_measured_fraction_max    0.986
_diffrn_reflns_Laue_measured_fraction_full   0.995
_diffrn_reflns_point_group_measured_fraction_max   0.986
_diffrn_reflns_point_group_measured_fraction_full  0.995
_reflns_number_total              15075
_reflns_number_gt                 11528
_reflns_threshold_expression      'I > 2\s(I)'
_reflns_Friedel_coverage          0.000
_reflns_Friedel_fraction_max      .
_reflns_Friedel_fraction_full     .
 
_reflns_special_details
;
 Reflections were merged by SHELXL according to the crystal
 class for the calculation of statistics and refinement.
 
 _reflns_Friedel_fraction is defined as the number of unique
 Friedel pairs measured divided by the number that would be
 possible theoretically, ignoring centric projections and
 systematic absences.
;
 
_computing_data_collection        'IPDS 2.92 (Stoe & Cie GmbH, 1999)' 
_computing_cell_refinement        'IPDS 2.92 (Stoe & Cie GmbH, 1999)' 
_computing_data_reduction         'IPDS 2.92 (Stoe & Cie GmbH, 1999)' 
_computing_structure_solution     'SHELXL-2013 (Sheldrick, 2013)' 
_computing_structure_refinement   'SHELXL-2013 (Sheldrick, 2013)' 
_computing_molecular_graphics     'Diamond 2.1 (Crystal Impact, 1998)' 
_computing_publication_material   'SHELXL-2013 (Sheldrick, 2013)' 
 
_refine_special_details
;
 Two t-butyl groups were two-fold disordered by rotation about their
 threefold axes, and were refined with partial occupancy isotropic
 atoms (58% and 42%) with geometric restraints. Two methylene carbons
 were also disordered, and refined anisotropically with geometrical
 and rigid-bond restraints.
 O-H distances were restrained to 0.92(4) Ang
 The lattice phenol was twofold disordered (58:42) and was refined 
 with the phenyl rings as rigid hexagons and rigid-bond restraints 
 to the anisotropic thermal parameters.
;
_refine_ls_structure_factor_coef  Fsqd
_refine_ls_matrix_type            full
_refine_ls_weighting_scheme       calc
_refine_ls_weighting_details
;
 w=1/[\s^2^(Fo^2^)+(0.0711P)^2^]
 where P=(Fo^2^+2Fc^2^)/3
;
_atom_sites_solution_primary      direct
_atom_sites_solution_secondary    difmap
_atom_sites_solution_hydrogens    mixed
_refine_ls_hydrogen_treatment     mixed
_refine_ls_extinction_method      none
_refine_ls_extinction_coef        .
_refine_ls_number_reflns          15075
_refine_ls_number_parameters      917
_refine_ls_number_restraints      97
_refine_ls_R_factor_all           0.0619
_refine_ls_R_factor_gt            0.0416
_refine_ls_wR_factor_ref          0.1073
_refine_ls_wR_factor_gt           0.0986
_refine_ls_goodness_of_fit_ref    0.986
_refine_ls_restrained_S_all       1.003
_refine_ls_shift/su_max           0.001
_refine_ls_shift/su_mean          0.000
 
loop_
 _atom_site_label
 _atom_site_type_symbol
 _atom_site_fract_x
 _atom_site_fract_y
 _atom_site_fract_z
 _atom_site_U_iso_or_equiv
 _atom_site_adp_type
 _atom_site_occupancy
 _atom_site_site_symmetry_order  
 _atom_site_calc_flag
 _atom_site_refinement_flags_posn
 _atom_site_refinement_flags_adp
 _atom_site_refinement_flags_occupancy
 _atom_site_disorder_assembly
 _atom_site_disorder_group
Y1 Y 0.25157(2) 0.43418(2) 0.22176(2) 0.01808(8) Uani 1 1 d . . . . .
Y2 Y 0.26650(2) 0.62594(2) 0.31297(2) 0.01792(8) Uani 1 1 d . . . . .
Fe1 Fe 0.32820(2) 0.44476(3) 0.36335(2) 0.01935(10) Uani 1 1 d . . . . .
Fe2 Fe 0.30149(2) 0.61371(3) 0.17850(2) 0.01758(10) Uani 1 1 d . . . . .
Fe3 Fe 0.30894(2) 0.27160(3) 0.30838(2) 0.02173(11) Uani 1 1 d . . . . .
Fe4 Fe 0.29187(3) 0.78721(3) 0.23069(2) 0.02143(11) Uani 1 1 d . . . . .
O1 O 0.24519(12) 0.48133(13) 0.31157(9) 0.0181(4) Uani 1 1 d D . . . .
H1 H 0.2055(16) 0.478(2) 0.3217(15) 0.022 Uiso 1 1 d D U . . .
O2 O 0.23380(12) 0.57739(13) 0.22252(9) 0.0177(4) Uani 1 1 d D . . . .
H2 H 0.1893(16) 0.585(2) 0.2093(15) 0.021 Uiso 1 1 d D U . . .
N1 N 0.44292(16) 0.42682(18) 0.39604(14) 0.0318(7) Uani 1 1 d . U . . .
C1 C 0.47011(18) 0.3750(2) 0.35613(16) 0.0300(8) Uani 1 1 d . . . . .
H1A H 0.4667 0.3173 0.3665 0.036 Uiso 1 1 calc R U . . .
H1B H 0.5209 0.3877 0.3573 0.036 Uiso 1 1 calc R U . . .
C2 C 0.42852(17) 0.3878(2) 0.29788(15) 0.0271(8) Uani 1 1 d . . . . .
H2A H 0.4394 0.4421 0.2844 0.032 Uiso 1 1 calc R U . . .
H2B H 0.4425 0.3464 0.2731 0.032 Uiso 1 1 calc R U . . .
O3 O 0.35365(11) 0.38158(13) 0.29770(9) 0.0204(5) Uani 1 1 d . . . . .
C3A C 0.4818(4) 0.5095(4) 0.3883(4) 0.0315(16) Uani 0.58 1 d D U P A 1
H3A1 H 0.5207 0.5193 0.4202 0.038 Uiso 0.58 1 calc R U P A 1
H3A2 H 0.5026 0.5070 0.3547 0.038 Uiso 0.58 1 calc R U P A 1
C4A C 0.4282(4) 0.5772(5) 0.3833(4) 0.0279(17) Uani 0.58 1 d D U P A 1
H4A1 H 0.4149 0.5880 0.4193 0.034 Uiso 0.58 1 calc R U P A 1
H4A2 H 0.4479 0.6275 0.3704 0.034 Uiso 0.58 1 calc R U P A 1
C3B C 0.4637(5) 0.5063(6) 0.4135(4) 0.028(2) Uani 0.42 1 d D U P A 2
H3B1 H 0.5158 0.5091 0.4272 0.034 Uiso 0.42 1 calc R U P A 2
H3B2 H 0.4394 0.5237 0.4434 0.034 Uiso 0.42 1 calc R U P A 2
C4B C 0.4422(6) 0.5593(6) 0.3637(4) 0.025(2) Uani 0.42 1 d D U P A 2
H4B1 H 0.4536 0.6167 0.3734 0.030 Uiso 0.42 1 calc R U P A 2
H4B2 H 0.4685 0.5430 0.3348 0.030 Uiso 0.42 1 calc R U P A 2
O4 O 0.36736(11) 0.55018(14) 0.34405(10) 0.0228(5) Uani 1 1 d . U . . .
C5 C 0.4548(3) 0.3874(4) 0.45041(19) 0.0616(15) Uani 1 1 d . . . . .
H5A H 0.4388 0.3308 0.4463 0.092 Uiso 1 1 calc R U . . .
H5B H 0.4279 0.4162 0.4743 0.092 Uiso 1 1 calc R U . . .
H5C H 0.5057 0.3889 0.4668 0.092 Uiso 1 1 calc R U . . .
N2 N 0.40792(15) 0.63343(17) 0.15974(13) 0.0262(6) Uani 1 1 d . . . . .
C6 C 0.44315(19) 0.6948(2) 0.19960(17) 0.0315(8) Uani 1 1 d . . . . .
H6A H 0.4289 0.7499 0.1859 0.038 Uiso 1 1 calc R U . . .
H6B H 0.4955 0.6902 0.2037 0.038 Uiso 1 1 calc R U . . .
C7 C 0.42216(18) 0.6817(2) 0.25443(16) 0.0323(8) Uani 1 1 d . . . . .
H7A H 0.4423 0.6298 0.2706 0.039 Uiso 1 1 calc R U . . .
H7B H 0.4415 0.7261 0.2799 0.039 Uiso 1 1 calc R U . . .
O5 O 0.34625(11) 0.67989(13) 0.24752(9) 0.0201(5) Uani 1 1 d . . . . .
C8 C 0.4476(2) 0.5545(2) 0.17018(19) 0.0361(9) Uani 1 1 d . . . . .
H8A H 0.4771 0.5462 0.1419 0.043 Uiso 1 1 calc R U . . .
H8B H 0.4797 0.5563 0.2066 0.043 Uiso 1 1 calc R U . . .
C9 C 0.3966(2) 0.4859(2) 0.16849(17) 0.0317(8) Uani 1 1 d . . . . .
H9A H 0.3726 0.4752 0.1301 0.038 Uiso 1 1 calc R U . . .
H9B H 0.4224 0.4361 0.1833 0.038 Uiso 1 1 calc R U . . .
O6 O 0.34544(12) 0.50699(13) 0.20070(9) 0.0208(5) Uani 1 1 d . . . . .
C10 C 0.4031(2) 0.6616(3) 0.10333(18) 0.0456(11) Uani 1 1 d . . . . .
H10A H 0.3810 0.6194 0.0778 0.068 Uiso 1 1 calc R U . . .
H10B H 0.4510 0.6732 0.0968 0.068 Uiso 1 1 calc R U . . .
H10C H 0.3742 0.7110 0.0975 0.068 Uiso 1 1 calc R U . . .
N3 N 0.22577(16) 0.19868(18) 0.33701(14) 0.0328(7) Uani 1 1 d . . . . .
C11 C 0.2332(3) 0.2181(3) 0.3962(2) 0.0489(11) Uani 1 1 d . . . . .
H11A H 0.2714 0.1842 0.4176 0.059 Uiso 1 1 calc R U . . .
H11B H 0.1883 0.2048 0.4083 0.059 Uiso 1 1 calc R U . . .
C12 C 0.2505(3) 0.3057(3) 0.40773(19) 0.0464(11) Uani 1 1 d . . . . .
H12A H 0.2069 0.3387 0.3969 0.056 Uiso 1 1 calc R U . . .
H12B H 0.2683 0.3134 0.4476 0.056 Uiso 1 1 calc R U . . .
O7 O 0.30274(12) 0.33209(13) 0.37837(10) 0.0244(5) Uani 1 1 d . . . . .
C13 C 0.1572(2) 0.2262(3) 0.3053(2) 0.0610(15) Uani 1 1 d . U . . .
H13A H 0.1351 0.2638 0.3282 0.073 Uiso 0.76 1 calc R U P B 1
H13B H 0.1253 0.1787 0.2967 0.073 Uiso 0.76 1 calc R U P B 1
H13C H 0.1397 0.1844 0.2772 0.073 Uiso 0.24 1 calc R U P B 2
H13D H 0.1229 0.2287 0.3304 0.073 Uiso 0.24 1 calc R U P B 2
C14A C 0.1630(3) 0.2675(3) 0.2534(3) 0.0383(13) Uani 0.76 1 d . U P C 1
H14A H 0.1679 0.2268 0.2250 0.046 Uiso 0.76 1 calc R U P C 1
H14B H 0.1196 0.2999 0.2400 0.046 Uiso 0.76 1 calc R U P C 1
C14B C 0.1563(8) 0.2994(10) 0.2793(8) 0.030(3) Uiso 0.24 1 d . . P C 2
H14C H 0.1452 0.3425 0.3042 0.036 Uiso 0.24 1 calc R U P C 2
H14D H 0.1179 0.2990 0.2462 0.036 Uiso 0.24 1 calc R U P C 2
O8 O 0.22281(12) 0.31816(14) 0.26325(10) 0.0258(5) Uani 1 1 d . U . . .
C15 C 0.2345(3) 0.1111(3) 0.3300(3) 0.0654(16) Uani 1 1 d . . . . .
H15A H 0.2316 0.0989 0.2910 0.098 Uiso 1 1 calc R U . . .
H15B H 0.1968 0.0819 0.3436 0.098 Uiso 1 1 calc R U . . .
H15C H 0.2810 0.0941 0.3509 0.098 Uiso 1 1 calc R U . . .
N4 N 0.19441(17) 0.85539(19) 0.19354(14) 0.0332(7) Uani 1 1 d . . . . .
C16 C 0.1828(2) 0.8333(2) 0.13500(17) 0.0370(9) Uani 1 1 d . . . . .
H16A H 0.2150 0.8656 0.1167 0.044 Uiso 1 1 calc R U . . .
H16B H 0.1332 0.8464 0.1173 0.044 Uiso 1 1 calc R U . . .
C17 C 0.19626(19) 0.7446(2) 0.12763(16) 0.0310(8) Uani 1 1 d . . . . .
H17A H 0.1583 0.7118 0.1390 0.037 Uiso 1 1 calc R U . . .
H17B H 0.1965 0.7328 0.0885 0.037 Uiso 1 1 calc R U . . .
O9 O 0.26361(12) 0.72461(13) 0.16065(9) 0.0219(5) Uani 1 1 d . . . . .
C18 C 0.1361(2) 0.8241(3) 0.2199(2) 0.0517(13) Uani 1 1 d . . . . .
H18A H 0.1017 0.8681 0.2225 0.062 Uiso 1 1 calc R U . . .
H18B H 0.1105 0.7797 0.1974 0.062 Uiso 1 1 calc R U . . .
C19 C 0.1667(2) 0.7935(3) 0.2756(2) 0.0449(11) Uani 1 1 d . . . . .
H19A H 0.1842 0.8393 0.3004 0.054 Uiso 1 1 calc R U . . .
H19B H 0.1301 0.7637 0.2909 0.054 Uiso 1 1 calc R U . . .
O10 O 0.22292(12) 0.74171(14) 0.27090(10) 0.0252(5) Uani 1 1 d . . . . .
C20 C 0.2019(3) 0.9437(3) 0.2012(2) 0.0605(14) Uani 1 1 d . . . . .
H20A H 0.2092 0.9566 0.2405 0.091 Uiso 1 1 calc R U . . .
H20B H 0.1587 0.9707 0.1818 0.091 Uiso 1 1 calc R U . . .
H20C H 0.2429 0.9628 0.1864 0.091 Uiso 1 1 calc R U . . .
O11 O 0.30563(14) 0.48243(14) 0.43380(10) 0.0279(5) Uani 1 1 d . . . . .
O12 O 0.26350(14) 0.60397(15) 0.40525(10) 0.0291(6) Uani 1 1 d . . . . .
C21 C 0.27987(18) 0.5523(2) 0.44159(14) 0.0253(7) Uani 1 1 d . . . . .
C22 C 0.2691(2) 0.5710(2) 0.49950(15) 0.0316(8) Uani 1 1 d . . . . .
C23 C 0.3333(3) 0.5430(4) 0.5409(2) 0.0752(18) Uani 1 1 d . . . . .
H23A H 0.3753 0.5738 0.5358 0.113 Uiso 1 1 calc R U . . .
H23B H 0.3413 0.4850 0.5355 0.113 Uiso 1 1 calc R U . . .
H23C H 0.3249 0.5519 0.5782 0.113 Uiso 1 1 calc R U . . .
C24 C 0.2597(4) 0.6608(3) 0.5060(2) 0.086(2) Uani 1 1 d . . . . .
H24A H 0.2180 0.6793 0.4794 0.130 Uiso 1 1 calc R U . . .
H24B H 0.3022 0.6893 0.4995 0.130 Uiso 1 1 calc R U . . .
H24C H 0.2526 0.6723 0.5434 0.130 Uiso 1 1 calc R U . . .
C25 C 0.2056(3) 0.5222(4) 0.5088(2) 0.0693(17) Uani 1 1 d . . . . .
H25A H 0.1631 0.5394 0.4825 0.104 Uiso 1 1 calc R U . . .
H25B H 0.1981 0.5313 0.5464 0.104 Uiso 1 1 calc R U . . .
H25C H 0.2143 0.4644 0.5036 0.104 Uiso 1 1 calc R U . . .
O13 O 0.21758(13) 0.45665(15) 0.12542(10) 0.0293(5) Uani 1 1 d . . . . .
O14 O 0.25657(13) 0.57804(15) 0.10439(10) 0.0283(5) Uani 1 1 d . . . . .
C26 C 0.2260(2) 0.5093(2) 0.09194(15) 0.0301(8) Uani 1 1 d . . . . .
C27 C 0.1999(3) 0.4957(3) 0.03058(18) 0.0544(13) Uani 1 1 d D . . . .
C28A C 0.1506(5) 0.4275(6) 0.0171(5) 0.070(3) Uiso 0.58 1 d D . P D 1
H28A H 0.1363 0.4229 -0.0230 0.106 Uiso 0.58 1 calc R U P D 1
H28B H 0.1084 0.4368 0.0331 0.106 Uiso 0.58 1 calc R U P D 1
H28C H 0.1741 0.3773 0.0320 0.106 Uiso 0.58 1 calc R U P D 1
C29A C 0.1804(5) 0.5741(5) -0.0008(5) 0.075(3) Uiso 0.58 1 d D . P D 1
H29A H 0.2169 0.6152 0.0119 0.113 Uiso 0.58 1 calc R U P D 1
H29B H 0.1343 0.5934 0.0055 0.113 Uiso 0.58 1 calc R U P D 1
H29C H 0.1774 0.5644 -0.0402 0.113 Uiso 0.58 1 calc R U P D 1
C30A C 0.2739(4) 0.4693(6) 0.0111(4) 0.067(3) Uiso 0.58 1 d D . P D 1
H30A H 0.3087 0.5134 0.0194 0.101 Uiso 0.58 1 calc R U P D 1
H30B H 0.2641 0.4587 -0.0285 0.101 Uiso 0.58 1 calc R U P D 1
H30C H 0.2931 0.4202 0.0309 0.101 Uiso 0.58 1 calc R U P D 1
C28B C 0.1709(5) 0.4080(5) 0.0188(4) 0.031(2) Uiso 0.42 1 d D . P D 2
H28D H 0.1392 0.3945 0.0441 0.046 Uiso 0.42 1 calc R U P D 2
H28E H 0.2108 0.3696 0.0241 0.046 Uiso 0.42 1 calc R U P D 2
H28F H 0.1446 0.4045 -0.0191 0.046 Uiso 0.42 1 calc R U P D 2
C29B C 0.1280(6) 0.5499(7) 0.0192(6) 0.069(4) Uiso 0.42 1 d D . P D 2
H29D H 0.0963 0.5319 0.0436 0.104 Uiso 0.42 1 calc R U P D 2
H29E H 0.1039 0.5433 -0.0191 0.104 Uiso 0.42 1 calc R U P D 2
H29F H 0.1403 0.6071 0.0264 0.104 Uiso 0.42 1 calc R U P D 2
C30B C 0.2460(6) 0.5223(8) -0.0049(6) 0.068(4) Uiso 0.42 1 d D . P D 2
H30D H 0.2238 0.5107 -0.0432 0.102 Uiso 0.42 1 calc R U P D 2
H30E H 0.2915 0.4934 0.0044 0.102 Uiso 0.42 1 calc R U P D 2
H30F H 0.2542 0.5808 -0.0003 0.102 Uiso 0.42 1 calc R U P D 2
O15 O 0.33046(15) 0.22484(15) 0.23914(11) 0.0343(6) Uani 1 1 d . . . . .
O16 O 0.30500(15) 0.32901(15) 0.18186(11) 0.0328(6) Uani 1 1 d . . . . .
C31 C 0.3177(2) 0.2559(2) 0.19152(16) 0.0305(8) Uani 1 1 d . . . . .
C32 C 0.3196(2) 0.1980(2) 0.14394(17) 0.0407(10) Uani 1 1 d D . . . .
C33A C 0.3948(4) 0.1610(6) 0.1518(4) 0.053(2) Uiso 0.58 1 d D . P E 1
H33A H 0.3971 0.1234 0.1216 0.080 Uiso 0.58 1 calc R U P E 1
H33B H 0.4052 0.1316 0.1868 0.080 Uiso 0.58 1 calc R U P E 1
H33C H 0.4298 0.2044 0.1520 0.080 Uiso 0.58 1 calc R U P E 1
C34A C 0.3007(6) 0.2400(6) 0.0890(4) 0.059(2) Uiso 0.58 1 d D . P E 1
H34A H 0.3025 0.2008 0.0596 0.089 Uiso 0.58 1 calc R U P E 1
H34B H 0.3348 0.2839 0.0872 0.089 Uiso 0.58 1 calc R U P E 1
H34C H 0.2527 0.2627 0.0845 0.089 Uiso 0.58 1 calc R U P E 1
C35A C 0.2696(6) 0.1277(6) 0.1478(5) 0.077(3) Uiso 0.58 1 d D . P E 1
H35A H 0.2703 0.0899 0.1174 0.116 Uiso 0.58 1 calc R U P E 1
H35B H 0.2211 0.1484 0.1456 0.116 Uiso 0.58 1 calc R U P E 1
H35C H 0.2850 0.0994 0.1828 0.116 Uiso 0.58 1 calc R U P E 1
C33B C 0.3675(9) 0.1251(9) 0.1616(8) 0.089(5) Uiso 0.42 1 d D . P E 2
H33D H 0.3671 0.0893 0.1300 0.134 Uiso 0.42 1 calc R U P E 2
H33E H 0.3500 0.0953 0.1905 0.134 Uiso 0.42 1 calc R U P E 2
H33F H 0.4162 0.1438 0.1757 0.134 Uiso 0.42 1 calc R U P E 2
C34B C 0.3358(9) 0.2462(9) 0.0943(6) 0.070(4) Uiso 0.42 1 d D . P E 2
H34D H 0.3369 0.2090 0.0637 0.105 Uiso 0.42 1 calc R U P E 2
H34E H 0.3820 0.2732 0.1047 0.105 Uiso 0.42 1 calc R U P E 2
H34F H 0.2986 0.2870 0.0831 0.105 Uiso 0.42 1 calc R U P E 2
C35B C 0.2447(6) 0.1619(10) 0.1309(7) 0.074(4) Uiso 0.42 1 d D . P E 2
H35D H 0.2415 0.1232 0.1004 0.111 Uiso 0.42 1 calc R U P E 2
H35E H 0.2099 0.2054 0.1204 0.111 Uiso 0.42 1 calc R U P E 2
H35F H 0.2347 0.1338 0.1634 0.111 Uiso 0.42 1 calc R U P E 2
O17 O 0.34227(15) 0.83439(15) 0.30266(11) 0.0326(6) Uani 1 1 d . . . . .
O18 O 0.33908(15) 0.72976(14) 0.35926(11) 0.0321(6) Uani 1 1 d . . . . .
C36 C 0.3549(2) 0.8006(2) 0.34937(15) 0.0280(8) Uani 1 1 d . . . . .
C37 C 0.3955(2) 0.8525(3) 0.39661(17) 0.0413(10) Uani 1 1 d . . . . .
C38 C 0.3913(4) 0.8181(4) 0.4512(2) 0.096(3) Uani 1 1 d . . . . .
H38A H 0.4193 0.8518 0.4802 0.145 Uiso 1 1 calc R U . . .
H38B H 0.4104 0.7628 0.4540 0.145 Uiso 1 1 calc R U . . .
H38C H 0.3416 0.8171 0.4556 0.145 Uiso 1 1 calc R U . . .
C39 C 0.3685(5) 0.9401(3) 0.3901(3) 0.104(3) Uani 1 1 d . . . . .
H39A H 0.3727 0.9605 0.3538 0.156 Uiso 1 1 calc R U . . .
H39B H 0.3970 0.9741 0.4186 0.156 Uiso 1 1 calc R U . . .
H39C H 0.3185 0.9418 0.3939 0.156 Uiso 1 1 calc R U . . .
C40 C 0.4721(3) 0.8551(5) 0.3887(3) 0.104(3) Uani 1 1 d . . . . .
H40A H 0.4736 0.8761 0.3520 0.156 Uiso 1 1 calc R U . . .
H40B H 0.4922 0.8002 0.3925 0.156 Uiso 1 1 calc R U . . .
H40C H 0.4999 0.8906 0.4165 0.156 Uiso 1 1 calc R U . . .
O19 O 0.13162(12) 0.44215(14) 0.20423(11) 0.0269(5) Uani 1 1 d . . . . .
O20 O 0.09824(14) 0.56698(15) 0.17639(12) 0.0364(6) Uani 1 1 d . . . . .
C41 C 0.08578(17) 0.4935(2) 0.18165(15) 0.0259(7) Uani 1 1 d . . . . .
C42 C 0.01095(19) 0.4605(2) 0.15949(18) 0.0353(9) Uani 1 1 d . . . . .
C43 C 0.0161(3) 0.3969(4) 0.1163(3) 0.0749(18) Uani 1 1 d . . . . .
H43A H 0.0499 0.3547 0.1322 0.112 Uiso 1 1 calc R U . . .
H43B H 0.0325 0.4224 0.0852 0.112 Uiso 1 1 calc R U . . .
H43C H -0.0309 0.3724 0.1034 0.112 Uiso 1 1 calc R U . . .
C44 C -0.0399(2) 0.5270(3) 0.1363(3) 0.0649(16) Uani 1 1 d . . . . .
H44A H -0.0872 0.5038 0.1230 0.097 Uiso 1 1 calc R U . . .
H44B H -0.0231 0.5533 0.1057 0.097 Uiso 1 1 calc R U . . .
H44C H -0.0424 0.5672 0.1650 0.097 Uiso 1 1 calc R U . . .
C45 C -0.0149(3) 0.4199(5) 0.2067(3) 0.087(2) Uani 1 1 d . . . . .
H45A H 0.0181 0.3764 0.2217 0.130 Uiso 1 1 calc R U . . .
H45B H -0.0624 0.3970 0.1935 0.130 Uiso 1 1 calc R U . . .
H45C H -0.0171 0.4600 0.2355 0.130 Uiso 1 1 calc R U . . .
O21 O 0.14905(13) 0.61891(14) 0.31742(11) 0.0284(5) Uani 1 1 d . . . . .
O22 O 0.11925(14) 0.49723(15) 0.34356(13) 0.0375(7) Uani 1 1 d . . . . .
C46 C 0.10732(18) 0.5710(2) 0.33536(16) 0.0280(8) Uani 1 1 d . . . . .
C47 C 0.0386(2) 0.6092(3) 0.3469(2) 0.0430(10) Uani 1 1 d . . . . .
C48 C -0.0018(3) 0.6455(5) 0.2942(3) 0.086(2) Uani 1 1 d . . . . .
H48A H 0.0288 0.6843 0.2797 0.129 Uiso 1 1 calc R U . . .
H48B H -0.0442 0.6736 0.3014 0.129 Uiso 1 1 calc R U . . .
H48C H -0.0163 0.6023 0.2672 0.129 Uiso 1 1 calc R U . . .
C49 C -0.0063(3) 0.5477(4) 0.3704(3) 0.088(2) Uani 1 1 d . . . . .
H49A H -0.0487 0.5745 0.3787 0.132 Uiso 1 1 calc R U . . .
H49B H 0.0216 0.5245 0.4042 0.132 Uiso 1 1 calc R U . . .
H49C H -0.0208 0.5043 0.3436 0.132 Uiso 1 1 calc R U . . .
C50 C 0.0592(3) 0.6777(3) 0.3877(3) 0.0702(17) Uani 1 1 d . . . . .
H50A H 0.0873 0.7180 0.3721 0.105 Uiso 1 1 calc R U . . .
H50B H 0.0875 0.6560 0.4218 0.105 Uiso 1 1 calc R U . . .
H50C H 0.0161 0.7035 0.3955 0.105 Uiso 1 1 calc R U . . .
N11 N 0.38629(17) 0.19715(19) 0.34636(15) 0.0344(7) Uani 1 1 d . . . . .
N12 N 0.40207(17) 0.1786(2) 0.39327(17) 0.0415(9) Uani 1 1 d . . . . .
N13 N 0.4197(3) 0.1594(4) 0.4382(2) 0.0814(16) Uani 1 1 d . . . . .
N21 N 0.34991(19) 0.86471(19) 0.19488(14) 0.0356(8) Uani 1 1 d . . . . .
N22 N 0.38835(17) 0.91676(19) 0.21701(15) 0.0342(7) Uani 1 1 d . . . . .
N23 N 0.4261(2) 0.9673(3) 0.2357(2) 0.0627(12) Uani 1 1 d . . . . .
O61A O 0.0424(2) 0.3593(3) 0.3442(2) 0.0327(10) Uani 0.58 1 d . U P F 1
H61A H 0.0644 0.4037 0.3469 0.039 Uiso 0.58 1 calc R U P F 1
C61A C 0.0440(7) 0.3279(6) 0.3957(3) 0.038(3) Uani 0.58 1 d G U P F 1
C62A C 0.0113(6) 0.2538(6) 0.4009(3) 0.051(3) Uani 0.58 1 d G U P F 1
H62A H -0.0129 0.2261 0.3691 0.061 Uiso 0.58 1 calc R U P F 1
C63A C 0.0140(5) 0.2201(4) 0.4527(4) 0.063(3) Uani 0.58 1 d G U P F 1
H63A H -0.0084 0.1694 0.4563 0.075 Uiso 0.58 1 calc R U P F 1
C64A C 0.0494(6) 0.2605(5) 0.4992(3) 0.085(4) Uani 0.58 1 d G U P F 1
H64A H 0.0512 0.2375 0.5346 0.102 Uiso 0.58 1 calc R U P F 1
C65A C 0.0821(5) 0.3347(5) 0.4940(3) 0.079(4) Uani 0.58 1 d G U P F 1
H65A H 0.1063 0.3623 0.5258 0.095 Uiso 0.58 1 calc R U P F 1
C66A C 0.0794(6) 0.3684(5) 0.4422(4) 0.056(3) Uani 0.58 1 d G U P F 1
H66A H 0.1018 0.4190 0.4387 0.067 Uiso 0.58 1 calc R U P F 1
O61B O -0.0150(7) 0.2043(8) 0.3344(5) 0.102(4) Uani 0.42 1 d . U P G 2
H61B H -0.0342 0.1595 0.3388 0.122 Uiso 0.42 1 calc R U P G 2
C61B C 0.0033(10) 0.2424(11) 0.3836(4) 0.050(3) Uani 0.42 1 d G U P G 2
C62B C -0.0130(8) 0.2050(7) 0.4299(5) 0.061(4) Uani 0.42 1 d G U P G 2
H62B H -0.0367 0.1540 0.4265 0.074 Uiso 0.42 1 calc R U P G 2
C63B C 0.0054(8) 0.2420(8) 0.4810(4) 0.080(6) Uani 0.42 1 d G U P G 2
H63B H -0.0058 0.2164 0.5126 0.096 Uiso 0.42 1 calc R U P G 2
C64B C 0.0400(8) 0.3166(9) 0.4859(6) 0.097(6) Uani 0.42 1 d G U P G 2
H64B H 0.0526 0.3419 0.5209 0.117 Uiso 0.42 1 calc R U P G 2
C65B C 0.0563(9) 0.3541(9) 0.4397(8) 0.082(6) Uani 0.42 1 d G U P G 2
H65B H 0.0800 0.4051 0.4430 0.098 Uiso 0.42 1 calc R U P G 2
C66B C 0.0379(11) 0.3170(12) 0.3885(6) 0.065(5) Uani 0.42 1 d G U P G 2
H66B H 0.0491 0.3426 0.3569 0.078 Uiso 0.42 1 calc R U P G 2
 
loop_
 _atom_site_aniso_label
 _atom_site_aniso_U_11
 _atom_site_aniso_U_22
 _atom_site_aniso_U_33
 _atom_site_aniso_U_23
 _atom_site_aniso_U_13
 _atom_site_aniso_U_12
Y1 0.02057(15) 0.01471(14) 0.01881(17) -0.00106(11) 0.00343(12) -0.00116(11)
Y2 0.02319(16) 0.01521(15) 0.01605(16) 0.00085(11) 0.00554(12) 0.00034(11)
Fe1 0.0214(2) 0.0179(2) 0.0179(2) -0.00004(18) 0.00177(18) 0.00320(18)
Fe2 0.0200(2) 0.0174(2) 0.0161(2) 0.00005(17) 0.00537(17) -0.00143(17)
Fe3 0.0229(2) 0.0156(2) 0.0267(3) 0.00155(18) 0.00488(19) 0.00042(18)
Fe4 0.0278(2) 0.0159(2) 0.0220(3) 0.00213(18) 0.0084(2) -0.00154(18)
O1 0.0179(10) 0.0174(11) 0.0193(12) 0.0008(9) 0.0046(9) 0.0011(9)
O2 0.0174(10) 0.0172(11) 0.0192(12) -0.0006(9) 0.0053(9) -0.0017(9)
N1 0.0277(15) 0.0246(15) 0.0366(19) -0.0059(13) -0.0100(13) 0.0053(12)
C1 0.0201(17) 0.034(2) 0.035(2) 0.0037(16) 0.0041(15) 0.0024(14)
C2 0.0174(16) 0.0323(19) 0.033(2) 0.0033(15) 0.0073(14) 0.0012(14)
O3 0.0185(11) 0.0196(11) 0.0242(13) -0.0007(9) 0.0070(9) 0.0011(9)
C3A 0.017(3) 0.024(3) 0.048(5) -0.004(3) -0.006(3) -0.002(3)
C4A 0.022(4) 0.024(4) 0.034(5) 0.002(3) -0.003(3) -0.001(3)
C3B 0.021(5) 0.029(5) 0.034(6) -0.004(4) 0.003(4) -0.001(4)
C4B 0.018(4) 0.015(4) 0.040(6) -0.015(4) 0.000(4) -0.006(4)
O4 0.0182(11) 0.0258(12) 0.0230(13) 0.0015(10) 0.0005(9) -0.0002(9)
C5 0.050(3) 0.100(4) 0.027(3) -0.007(3) -0.010(2) 0.037(3)
N2 0.0248(15) 0.0267(15) 0.0304(17) 0.0026(12) 0.0132(13) -0.0010(12)
C6 0.0230(17) 0.033(2) 0.041(2) -0.0032(16) 0.0133(16) -0.0058(15)
C7 0.0190(17) 0.041(2) 0.035(2) -0.0039(17) 0.0019(15) 0.0004(15)
O5 0.0183(11) 0.0196(11) 0.0217(13) -0.0008(9) 0.0022(9) -0.0013(9)
C8 0.032(2) 0.031(2) 0.051(3) 0.0031(18) 0.0230(18) 0.0051(16)
C9 0.0327(19) 0.0298(19) 0.038(2) 0.0002(16) 0.0192(17) 0.0089(15)
O6 0.0210(11) 0.0217(11) 0.0215(12) 0.0002(9) 0.0087(9) 0.0008(9)
C10 0.043(2) 0.065(3) 0.033(2) 0.012(2) 0.0185(19) -0.006(2)
N3 0.0317(16) 0.0264(16) 0.039(2) 0.0099(14) 0.0045(14) -0.0070(13)
C11 0.057(3) 0.047(3) 0.047(3) 0.012(2) 0.021(2) -0.012(2)
C12 0.064(3) 0.045(2) 0.038(3) 0.0002(19) 0.030(2) -0.010(2)
O7 0.0296(12) 0.0196(11) 0.0256(13) 0.0037(10) 0.0096(10) 0.0012(9)
C13 0.032(2) 0.074(3) 0.070(4) 0.038(3) -0.006(2) -0.021(2)
C14A 0.025(2) 0.033(3) 0.055(4) 0.009(3) 0.002(2) -0.012(2)
O8 0.0224(12) 0.0214(12) 0.0318(15) 0.0055(10) 0.0009(10) -0.0058(9)
C15 0.076(4) 0.024(2) 0.101(5) 0.002(2) 0.030(3) -0.014(2)
N4 0.0420(18) 0.0281(16) 0.0322(19) 0.0115(13) 0.0141(15) 0.0162(14)
C16 0.045(2) 0.035(2) 0.032(2) 0.0140(17) 0.0093(18) 0.0080(17)
C17 0.0297(18) 0.0303(19) 0.030(2) 0.0103(16) -0.0018(15) 0.0038(15)
O9 0.0249(12) 0.0217(11) 0.0193(12) 0.0035(9) 0.0046(9) 0.0003(9)
C18 0.037(2) 0.076(3) 0.047(3) 0.026(2) 0.022(2) 0.026(2)
C19 0.045(2) 0.043(2) 0.054(3) 0.021(2) 0.028(2) 0.0219(19)
O10 0.0284(12) 0.0215(12) 0.0290(14) 0.0072(10) 0.0138(10) 0.0060(10)
C20 0.090(4) 0.032(2) 0.060(3) 0.005(2) 0.015(3) 0.027(2)
O11 0.0401(14) 0.0250(12) 0.0194(13) 0.0016(10) 0.0079(11) 0.0055(11)
O12 0.0440(15) 0.0273(13) 0.0184(13) 0.0037(10) 0.0125(11) 0.0066(11)
C21 0.0277(17) 0.0278(18) 0.0214(19) -0.0001(14) 0.0073(14) -0.0009(14)
C22 0.045(2) 0.034(2) 0.0178(19) 0.0021(15) 0.0114(16) 0.0000(17)
C23 0.075(4) 0.122(5) 0.025(3) -0.005(3) -0.001(2) 0.013(4)
C24 0.184(7) 0.043(3) 0.050(4) -0.005(2) 0.066(4) 0.004(4)
C25 0.076(4) 0.091(4) 0.052(3) -0.013(3) 0.040(3) -0.020(3)
O13 0.0373(14) 0.0302(13) 0.0182(13) 0.0003(10) 0.0001(10) -0.0034(11)
O14 0.0373(14) 0.0279(13) 0.0188(13) -0.0008(10) 0.0028(10) -0.0046(11)
C26 0.034(2) 0.033(2) 0.022(2) -0.0061(15) 0.0035(15) 0.0014(16)
C27 0.096(4) 0.043(2) 0.016(2) -0.0024(18) -0.008(2) -0.011(2)
O15 0.0475(16) 0.0229(13) 0.0326(16) -0.0052(11) 0.0078(12) 0.0076(11)
O16 0.0479(16) 0.0225(13) 0.0305(15) -0.0040(11) 0.0138(12) 0.0029(11)
C31 0.035(2) 0.0233(18) 0.035(2) -0.0037(15) 0.0097(16) 0.0032(15)
C32 0.058(3) 0.030(2) 0.034(2) -0.0096(17) 0.0088(19) 0.0074(18)
O17 0.0503(16) 0.0231(13) 0.0250(15) -0.0032(10) 0.0088(12) -0.0101(11)
O18 0.0496(16) 0.0200(12) 0.0246(14) -0.0005(10) 0.0020(12) -0.0086(11)
C36 0.0346(19) 0.0231(17) 0.027(2) -0.0054(15) 0.0080(15) -0.0060(15)
C37 0.059(3) 0.038(2) 0.027(2) -0.0111(17) 0.0085(19) -0.017(2)
C38 0.172(7) 0.082(4) 0.032(3) -0.011(3) 0.010(4) -0.068(5)
C39 0.185(8) 0.041(3) 0.075(5) -0.036(3) -0.004(5) 0.001(4)
C40 0.065(4) 0.164(8) 0.080(5) -0.046(5) 0.011(3) -0.057(5)
O19 0.0191(11) 0.0228(12) 0.0369(15) 0.0048(10) 0.0006(10) -0.0009(9)
O20 0.0306(14) 0.0246(13) 0.0516(19) 0.0066(12) 0.0021(12) -0.0006(11)
C41 0.0199(16) 0.0298(19) 0.0268(19) 0.0047(15) 0.0013(14) -0.0040(14)
C42 0.0219(18) 0.040(2) 0.041(2) 0.0031(18) -0.0014(16) -0.0037(16)
C43 0.045(3) 0.073(4) 0.098(5) -0.041(3) -0.006(3) -0.006(3)
C44 0.035(2) 0.063(3) 0.083(4) 0.001(3) -0.021(2) 0.012(2)
C45 0.040(3) 0.131(6) 0.087(5) 0.047(4) 0.008(3) -0.029(3)
O21 0.0250(12) 0.0269(13) 0.0364(15) 0.0068(11) 0.0136(11) 0.0039(10)
O22 0.0330(14) 0.0255(13) 0.0580(19) 0.0113(13) 0.0191(13) 0.0032(11)
C46 0.0214(17) 0.0321(19) 0.032(2) 0.0031(15) 0.0074(14) 0.0029(14)
C47 0.030(2) 0.042(2) 0.061(3) 0.003(2) 0.021(2) 0.0077(18)
C48 0.047(3) 0.115(5) 0.090(5) 0.015(4) -0.002(3) 0.038(3)
C49 0.050(3) 0.065(4) 0.169(7) 0.017(4) 0.071(4) 0.009(3)
C50 0.073(4) 0.064(3) 0.087(4) -0.011(3) 0.049(3) 0.015(3)
N11 0.0354(17) 0.0284(16) 0.041(2) 0.0092(15) 0.0109(15) 0.0106(14)
N12 0.0282(17) 0.040(2) 0.055(3) 0.0125(18) 0.0045(16) 0.0037(14)
N13 0.064(3) 0.121(5) 0.052(3) 0.036(3) -0.006(2) 0.012(3)
N21 0.048(2) 0.0295(17) 0.0318(19) 0.0024(14) 0.0150(15) -0.0111(15)
N22 0.0334(17) 0.0291(17) 0.043(2) 0.0012(15) 0.0155(15) -0.0032(15)
N23 0.056(3) 0.051(2) 0.082(3) -0.012(2) 0.019(2) -0.029(2)
O61A 0.034(2) 0.024(2) 0.039(3) 0.0089(19) 0.006(2) -0.0063(18)
C61A 0.033(6) 0.039(5) 0.047(5) 0.016(5) 0.022(5) 0.008(4)
C62A 0.048(6) 0.038(5) 0.073(7) 0.021(5) 0.026(6) 0.006(4)
C63A 0.077(9) 0.041(5) 0.084(9) 0.027(5) 0.049(7) 0.011(5)
C64A 0.138(13) 0.065(8) 0.065(7) 0.020(6) 0.051(7) 0.018(7)
C65A 0.129(12) 0.066(7) 0.047(6) 0.006(5) 0.029(7) 0.009(7)
C66A 0.062(8) 0.063(7) 0.046(5) 0.010(4) 0.019(5) 0.006(5)
O61B 0.129(10) 0.099(8) 0.077(7) -0.011(6) 0.018(7) -0.020(7)
C61B 0.042(7) 0.060(8) 0.046(6) -0.002(6) 0.008(6) 0.014(6)
C62B 0.058(10) 0.072(9) 0.051(7) 0.001(6) 0.004(6) 0.020(7)
C63B 0.130(18) 0.065(10) 0.042(8) 0.003(7) 0.011(9) -0.007(10)
C64B 0.117(18) 0.091(13) 0.074(10) -0.008(9) -0.007(11) -0.017(12)
C65B 0.080(16) 0.060(10) 0.106(12) -0.008(8) 0.019(11) -0.021(9)
C66B 0.028(9) 0.072(11) 0.093(10) -0.013(9) 0.006(9) 0.009(8)
 
_geom_special_details
;
 All esds (except the esd in the dihedral angle between two l.s. planes)
 are estimated using the full covariance matrix.  The cell esds are taken
 into account individually in the estimation of esds in distances, angles
 and torsion angles; correlations between esds in cell parameters are only
 used when they are defined by crystal symmetry.  An approximate (isotropic)
 treatment of cell esds is used for estimating esds involving l.s. planes.
;
 
loop_
 _geom_bond_atom_site_label_1
 _geom_bond_atom_site_label_2
 _geom_bond_distance
 _geom_bond_site_symmetry_2
 _geom_bond_publ_flag
Y1 O19 2.257(2) . ?
Y1 O8 2.288(2) . ?
Y1 O6 2.303(2) . ?
Y1 O16 2.328(2) . ?
Y1 O13 2.380(2) . ?
Y1 O1 2.384(2) . ?
Y1 O2 2.384(2) . ?
Y1 O3 2.587(2) . ?
Y1 Y2 3.8631(5) . ?
Y2 O10 2.255(2) . ?
Y2 O21 2.276(2) . ?
Y2 O4 2.303(2) . ?
Y2 O12 2.328(2) . ?
Y2 O2 2.349(2) . ?
Y2 O18 2.357(2) . ?
Y2 O1 2.416(2) . ?
Y2 O5 2.591(2) . ?
Fe1 O1 1.936(2) . ?
Fe1 O7 1.973(2) . ?
Fe1 O11 1.979(2) . ?
Fe1 O4 1.986(2) . ?
Fe1 O3 2.068(2) . ?
Fe1 N1 2.209(3) . ?
Fe2 O2 1.944(2) . ?
Fe2 O14 1.962(2) . ?
Fe2 O6 1.980(2) . ?
Fe2 O9 1.984(2) . ?
Fe2 O5 2.070(2) . ?
Fe2 N2 2.201(3) . ?
Fe3 O8 1.961(2) . ?
Fe3 O15 1.996(3) . ?
Fe3 N11 2.011(3) . ?
Fe3 O7 2.025(2) . ?
Fe3 O3 2.043(2) . ?
Fe3 N3 2.218(3) . ?
Fe4 O10 1.952(2) . ?
Fe4 O9 2.002(2) . ?
Fe4 N21 2.009(3) . ?
Fe4 O17 2.013(3) . ?
Fe4 O5 2.053(2) . ?
Fe4 N4 2.220(3) . ?
O1 H1 0.85(3) . ?
O2 H2 0.86(3) . ?
N1 C3B 1.413(10) . ?
N1 C5 1.474(6) . ?
N1 C1 1.476(5) . ?
N1 C3A 1.582(8) . ?
C1 C2 1.523(5) . ?
C1 H1A 0.9900 . ?
C1 H1B 0.9900 . ?
C2 O3 1.436(4) . ?
C2 H2A 0.9900 . ?
C2 H2B 0.9900 . ?
C3A C4A 1.504(8) . ?
C3A H3A1 0.9900 . ?
C3A H3A2 0.9900 . ?
C4A O4 1.436(8) . ?
C4A H4A1 0.9900 . ?
C4A H4A2 0.9900 . ?
C3B C4B 1.504(12) . ?
C3B H3B1 0.9900 . ?
C3B H3B2 0.9900 . ?
C4B O4 1.429(11) . ?
C4B H4B1 0.9900 . ?
C4B H4B2 0.9900 . ?
C5 H5A 0.9800 . ?
C5 H5B 0.9800 . ?
C5 H5C 0.9800 . ?
N2 C10 1.460(5) . ?
N2 C6 1.482(5) . ?
N2 C8 1.503(5) . ?
C6 C7 1.506(5) . ?
C6 H6A 0.9900 . ?
C6 H6B 0.9900 . ?
C7 O5 1.431(4) . ?
C7 H7A 0.9900 . ?
C7 H7B 0.9900 . ?
C8 C9 1.489(5) . ?
C8 H8A 0.9900 . ?
C8 H8B 0.9900 . ?
C9 O6 1.422(4) . ?
C9 H9A 0.9900 . ?
C9 H9B 0.9900 . ?
C10 H10A 0.9800 . ?
C10 H10B 0.9800 . ?
C10 H10C 0.9800 . ?
N3 C15 1.466(5) . ?
N3 C13 1.466(5) . ?
N3 C11 1.482(6) . ?
C11 C12 1.495(6) . ?
C11 H11A 0.9900 . ?
C11 H11B 0.9900 . ?
C12 O7 1.415(4) . ?
C12 H12A 0.9900 . ?
C12 H12B 0.9900 . ?
C13 C14B 1.365(17) . ?
C13 C14A 1.479(7) . ?
C13 H13A 0.9900 . ?
C13 H13B 0.9900 . ?
C13 H13C 0.9900 . ?
C13 H13D 0.9900 . ?
C14A O8 1.400(5) . ?
C14A H14A 0.9900 . ?
C14A H14B 0.9900 . ?
C14B O8 1.441(16) . ?
C14B H14C 0.9900 . ?
C14B H14D 0.9900 . ?
C15 H15A 0.9800 . ?
C15 H15B 0.9800 . ?
C15 H15C 0.9800 . ?
N4 C20 1.471(5) . ?
N4 C16 1.471(5) . ?
N4 C18 1.491(5) . ?
C16 C17 1.500(5) . ?
C16 H16A 0.9900 . ?
C16 H16B 0.9900 . ?
C17 O9 1.426(4) . ?
C17 H17A 0.9900 . ?
C17 H17B 0.9900 . ?
C18 C19 1.480(6) . ?
C18 H18A 0.9900 . ?
C18 H18B 0.9900 . ?
C19 O10 1.395(4) . ?
C19 H19A 0.9900 . ?
C19 H19B 0.9900 . ?
C20 H20A 0.9800 . ?
C20 H20B 0.9800 . ?
C20 H20C 0.9800 . ?
O11 C21 1.282(4) . ?
O12 C21 1.235(4) . ?
C21 C22 1.521(5) . ?
C22 C24 1.502(6) . ?
C22 C23 1.512(7) . ?
C22 C25 1.514(6) . ?
C23 H23A 0.9800 . ?
C23 H23B 0.9800 . ?
C23 H23C 0.9800 . ?
C24 H24A 0.9800 . ?
C24 H24B 0.9800 . ?
C24 H24C 0.9800 . ?
C25 H25A 0.9800 . ?
C25 H25B 0.9800 . ?
C25 H25C 0.9800 . ?
O13 C26 1.233(4) . ?
O14 C26 1.284(4) . ?
C26 C27 1.523(6) . ?
C27 C30B 1.430(10) . ?
C27 C28A 1.464(9) . ?
C27 C29A 1.517(9) . ?
C27 C28B 1.555(8) . ?
C27 C29B 1.619(10) . ?
C27 C30A 1.642(9) . ?
C28A H28A 0.9800 . ?
C28A H28B 0.9800 . ?
C28A H28C 0.9800 . ?
C29A H29A 0.9800 . ?
C29A H29B 0.9800 . ?
C29A H29C 0.9800 . ?
C30A H30A 0.9800 . ?
C30A H30B 0.9800 . ?
C30A H30C 0.9800 . ?
C28B H28D 0.9800 . ?
C28B H28E 0.9800 . ?
C28B H28F 0.9800 . ?
C29B H29D 0.9800 . ?
C29B H29E 0.9800 . ?
C29B H29F 0.9800 . ?
C30B H30D 0.9800 . ?
C30B H30E 0.9800 . ?
C30B H30F 0.9800 . ?
O15 C31 1.267(5) . ?
O16 C31 1.242(4) . ?
C31 C32 1.523(5) . ?
C32 C34A 1.508(9) . ?
C32 C35A 1.518(9) . ?
C32 C33B 1.523(12) . ?
C32 C35B 1.529(11) . ?
C32 C33A 1.540(8) . ?
C32 C34B 1.545(11) . ?
C33A H33A 0.9800 . ?
C33A H33B 0.9800 . ?
C33A H33C 0.9800 . ?
C34A H34A 0.9800 . ?
C34A H34B 0.9800 . ?
C34A H34C 0.9800 . ?
C35A H35A 0.9800 . ?
C35A H35B 0.9800 . ?
C35A H35C 0.9800 . ?
C33B H33D 0.9800 . ?
C33B H33E 0.9800 . ?
C33B H33F 0.9800 . ?
C34B H34D 0.9800 . ?
C34B H34E 0.9800 . ?
C34B H34F 0.9800 . ?
C35B H35D 0.9800 . ?
C35B H35E 0.9800 . ?
C35B H35F 0.9800 . ?
O17 C36 1.265(5) . ?
O18 C36 1.242(4) . ?
C36 C37 1.535(5) . ?
C37 C38 1.485(7) . ?
C37 C40 1.516(8) . ?
C37 C39 1.531(7) . ?
C38 H38A 0.9800 . ?
C38 H38B 0.9800 . ?
C38 H38C 0.9800 . ?
C39 H39A 0.9800 . ?
C39 H39B 0.9800 . ?
C39 H39C 0.9800 . ?
C40 H40A 0.9800 . ?
C40 H40B 0.9800 . ?
C40 H40C 0.9800 . ?
O19 C41 1.269(4) . ?
O20 C41 1.246(4) . ?
C41 C42 1.531(5) . ?
C42 C44 1.503(6) . ?
C42 C45 1.513(7) . ?
C42 C43 1.516(7) . ?
C43 H43A 0.9800 . ?
C43 H43B 0.9800 . ?
C43 H43C 0.9800 . ?
C44 H44A 0.9800 . ?
C44 H44B 0.9800 . ?
C44 H44C 0.9800 . ?
C45 H45A 0.9800 . ?
C45 H45B 0.9800 . ?
C45 H45C 0.9800 . ?
O21 C46 1.263(4) . ?
O22 C46 1.247(4) . ?
C46 C47 1.535(5) . ?
C47 C48 1.508(8) . ?
C47 C50 1.515(7) . ?
C47 C49 1.516(6) . ?
C48 H48A 0.9800 . ?
C48 H48B 0.9800 . ?
C48 H48C 0.9800 . ?
C49 H49A 0.9800 . ?
C49 H49B 0.9800 . ?
C49 H49C 0.9800 . ?
C50 H50A 0.9800 . ?
C50 H50B 0.9800 . ?
C50 H50C 0.9800 . ?
N11 N12 1.184(5) . ?
N12 N13 1.145(6) . ?
N21 N22 1.192(5) . ?
N22 N23 1.141(5) . ?
O61A C61A 1.373(7) . ?
O61A H61A 0.8400 . ?
C61A C62A 1.3900 . ?
C61A C66A 1.3900 . ?
C62A C63A 1.3900 . ?
C62A H62A 0.9500 . ?
C63A C64A 1.3900 . ?
C63A H63A 0.9500 . ?
C64A C65A 1.3900 . ?
C64A H64A 0.9500 . ?
C65A C66A 1.3900 . ?
C65A H65A 0.9500 . ?
C66A H66A 0.9500 . ?
O61B C61B 1.357(16) . ?
O61B H61B 0.8400 . ?
C61B C62B 1.3900 . ?
C61B C66B 1.3900 . ?
C62B C63B 1.3900 . ?
C62B H62B 0.9500 . ?
C63B C64B 1.3900 . ?
C63B H63B 0.9500 . ?
C64B C65B 1.3900 . ?
C64B H64B 0.9500 . ?
C65B C66B 1.3900 . ?
C65B H65B 0.9500 . ?
C66B H66B 0.9500 . ?
 
loop_
 _geom_angle_atom_site_label_1
 _geom_angle_atom_site_label_2
 _geom_angle_atom_site_label_3
 _geom_angle
 _geom_angle_site_symmetry_1
 _geom_angle_site_symmetry_3
 _geom_angle_publ_flag
O19 Y1 O8 79.08(8) . . ?
O19 Y1 O6 137.36(8) . . ?
O8 Y1 O6 143.45(8) . . ?
O19 Y1 O16 118.42(9) . . ?
O8 Y1 O16 74.53(9) . . ?
O6 Y1 O16 82.22(8) . . ?
O19 Y1 O13 74.18(9) . . ?
O8 Y1 O13 122.57(9) . . ?
O6 Y1 O13 76.42(8) . . ?
O16 Y1 O13 75.30(9) . . ?
O19 Y1 O1 85.79(9) . . ?
O8 Y1 O1 77.98(8) . . ?
O6 Y1 O1 103.04(8) . . ?
O16 Y1 O1 138.23(9) . . ?
O13 Y1 O1 146.45(8) . . ?
O19 Y1 O2 78.61(8) . . ?
O8 Y1 O2 140.89(8) . . ?
O6 Y1 O2 66.76(7) . . ?
O16 Y1 O2 144.57(8) . . ?
O13 Y1 O2 80.93(8) . . ?
O1 Y1 O2 68.72(7) . . ?
O19 Y1 O3 139.20(8) . . ?
O8 Y1 O3 66.84(7) . . ?
O6 Y1 O3 80.01(7) . . ?
O16 Y1 O3 74.21(8) . . ?
O13 Y1 O3 143.50(8) . . ?
O1 Y1 O3 66.25(7) . . ?
O2 Y1 O3 114.49(7) . . ?
O10 Y2 O21 77.57(8) . . ?
O10 Y2 O4 145.52(8) . . ?
O21 Y2 O4 136.78(8) . . ?
O10 Y2 O12 120.58(8) . . ?
O21 Y2 O12 74.44(9) . . ?
O4 Y2 O12 76.44(9) . . ?
O10 Y2 O2 80.79(8) . . ?
O21 Y2 O2 86.88(9) . . ?
O4 Y2 O2 100.74(8) . . ?
O12 Y2 O2 146.38(8) . . ?
O10 Y2 O18 75.06(9) . . ?
O21 Y2 O18 120.55(9) . . ?
O4 Y2 O18 81.55(9) . . ?
O12 Y2 O18 76.03(9) . . ?
O2 Y2 O18 137.31(8) . . ?
O10 Y2 O1 141.34(8) . . ?
O21 Y2 O1 77.57(8) . . ?
O4 Y2 O1 66.36(8) . . ?
O12 Y2 O1 79.90(8) . . ?
O2 Y2 O1 68.75(7) . . ?
O18 Y2 O1 143.56(8) . . ?
O10 Y2 O5 68.31(7) . . ?
O21 Y2 O5 139.06(8) . . ?
O4 Y2 O5 80.66(7) . . ?
O12 Y2 O5 142.98(8) . . ?
O2 Y2 O5 66.38(7) . . ?
O18 Y2 O5 72.11(8) . . ?
O1 Y2 O5 116.59(7) . . ?
O1 Fe1 O7 102.52(10) . . ?
O1 Fe1 O11 101.32(10) . . ?
O7 Fe1 O11 91.38(10) . . ?
O1 Fe1 O4 82.41(9) . . ?
O7 Fe1 O4 170.61(10) . . ?
O11 Fe1 O4 95.49(10) . . ?
O1 Fe1 O3 85.58(9) . . ?
O7 Fe1 O3 77.28(9) . . ?
O11 Fe1 O3 167.86(10) . . ?
O4 Fe1 O3 95.32(9) . . ?
O1 Fe1 N1 156.26(11) . . ?
O7 Fe1 N1 93.98(11) . . ?
O11 Fe1 N1 95.14(12) . . ?
O4 Fe1 N1 79.07(11) . . ?
O3 Fe1 N1 81.51(11) . . ?
O2 Fe2 O14 102.40(10) . . ?
O2 Fe2 O6 82.20(9) . . ?
O14 Fe2 O6 94.60(10) . . ?
O2 Fe2 O9 98.86(9) . . ?
O14 Fe2 O9 89.53(10) . . ?
O6 Fe2 O9 175.42(10) . . ?
O2 Fe2 O5 84.96(9) . . ?
O14 Fe2 O5 165.56(10) . . ?
O6 Fe2 O5 98.74(9) . . ?
O9 Fe2 O5 76.96(9) . . ?
O2 Fe2 N2 155.48(11) . . ?
O14 Fe2 N2 95.87(11) . . ?
O6 Fe2 N2 80.14(10) . . ?
O9 Fe2 N2 97.50(10) . . ?
O5 Fe2 N2 81.08(10) . . ?
O8 Fe3 O15 87.19(11) . . ?
O8 Fe3 N11 165.34(12) . . ?
O15 Fe3 N11 84.92(13) . . ?
O8 Fe3 O7 96.56(10) . . ?
O15 Fe3 O7 169.53(11) . . ?
N11 Fe3 O7 93.37(12) . . ?
O8 Fe3 O3 84.63(9) . . ?
O15 Fe3 O3 93.97(10) . . ?
N11 Fe3 O3 108.20(11) . . ?
O7 Fe3 O3 76.72(9) . . ?
O8 Fe3 N3 79.50(11) . . ?
O15 Fe3 N3 110.29(12) . . ?
N11 Fe3 N3 91.67(12) . . ?
O7 Fe3 N3 80.05(11) . . ?
O3 Fe3 N3 150.07(11) . . ?
O8 Fe3 Y1 38.34(7) . . ?
O10 Fe4 O9 98.60(10) . . ?
O10 Fe4 N21 163.09(12) . . ?
O9 Fe4 N21 91.36(12) . . ?
O10 Fe4 O17 87.19(11) . . ?
O9 Fe4 O17 166.02(10) . . ?
N21 Fe4 O17 86.28(12) . . ?
O10 Fe4 O5 86.11(9) . . ?
O9 Fe4 O5 76.95(9) . . ?
N21 Fe4 O5 109.56(12) . . ?
O17 Fe4 O5 90.85(10) . . ?
O10 Fe4 N4 78.97(11) . . ?
O9 Fe4 N4 80.58(11) . . ?
N21 Fe4 N4 89.30(13) . . ?
O17 Fe4 N4 113.13(12) . . ?
O5 Fe4 N4 150.76(11) . . ?
Fe1 O1 Y1 109.52(10) . . ?
Fe1 O1 Y2 100.52(9) . . ?
Y1 O1 Y2 107.19(8) . . ?
Fe1 O1 H1 117(3) . . ?
Y1 O1 H1 118(3) . . ?
Y2 O1 H1 103(3) . . ?
Fe2 O2 Y2 110.36(10) . . ?
Fe2 O2 Y1 100.86(9) . . ?
Y2 O2 Y1 109.40(9) . . ?
Fe2 O2 H2 117(3) . . ?
Y2 O2 H2 112(3) . . ?
Y1 O2 H2 106(3) . . ?
C3B N1 C5 98.2(5) . . ?
C3B N1 C1 128.8(5) . . ?
C5 N1 C1 110.3(3) . . ?
C5 N1 C3A 119.9(4) . . ?
C1 N1 C3A 100.4(4) . . ?
C3B N1 Fe1 101.0(4) . . ?
C5 N1 Fe1 111.2(3) . . ?
C1 N1 Fe1 106.6(2) . . ?
C3A N1 Fe1 107.3(3) . . ?
N1 C1 C2 111.6(3) . . ?
N1 C1 H1A 109.3 . . ?
C2 C1 H1A 109.3 . . ?
N1 C1 H1B 109.3 . . ?
C2 C1 H1B 109.3 . . ?
H1A C1 H1B 108.0 . . ?
O3 C2 C1 109.4(3) . . ?
O3 C2 H2A 109.8 . . ?
C1 C2 H2A 109.8 . . ?
O3 C2 H2B 109.8 . . ?
C1 C2 H2B 109.8 . . ?
H2A C2 H2B 108.3 . . ?
C2 O3 Fe3 120.41(19) . . ?
C2 O3 Fe1 110.4(2) . . ?
Fe3 O3 Fe1 100.11(9) . . ?
C2 O3 Y1 126.25(19) . . ?
Fe3 O3 Y1 96.59(8) . . ?
Fe1 O3 Y1 98.30(8) . . ?
C4A C3A N1 108.5(5) . . ?
C4A C3A H3A1 110.0 . . ?
N1 C3A H3A1 110.0 . . ?
C4A C3A H3A2 110.0 . . ?
N1 C3A H3A2 110.0 . . ?
H3A1 C3A H3A2 108.4 . . ?
O4 C4A C3A 106.1(6) . . ?
O4 C4A H4A1 110.5 . . ?
C3A C4A H4A1 110.5 . . ?
O4 C4A H4A2 110.5 . . ?
C3A C4A H4A2 110.5 . . ?
H4A1 C4A H4A2 108.7 . . ?
N1 C3B C4B 105.6(8) . . ?
N1 C3B H3B1 110.6 . . ?
C4B C3B H3B1 110.6 . . ?
N1 C3B H3B2 110.6 . . ?
C4B C3B H3B2 110.6 . . ?
H3B1 C3B H3B2 108.8 . . ?
O4 C4B C3B 108.5(8) . . ?
O4 C4B H4B1 110.0 . . ?
C3B C4B H4B1 110.0 . . ?
O4 C4B H4B2 110.0 . . ?
C3B C4B H4B2 110.0 . . ?
H4B1 C4B H4B2 108.4 . . ?
C4B O4 Fe1 114.2(4) . . ?
C4A O4 Fe1 113.7(3) . . ?
C4B O4 Y2 141.0(4) . . ?
C4A O4 Y2 125.2(3) . . ?
Fe1 O4 Y2 102.89(9) . . ?
N1 C5 H5A 109.5 . . ?
N1 C5 H5B 109.5 . . ?
H5A C5 H5B 109.5 . . ?
N1 C5 H5C 109.5 . . ?
H5A C5 H5C 109.5 . . ?
H5B C5 H5C 109.5 . . ?
C10 N2 C6 111.0(3) . . ?
C10 N2 C8 112.1(3) . . ?
C6 N2 C8 109.0(3) . . ?
C10 N2 Fe2 111.1(2) . . ?
C6 N2 Fe2 106.3(2) . . ?
C8 N2 Fe2 107.1(2) . . ?
N2 C6 C7 109.8(3) . . ?
N2 C6 H6A 109.7 . . ?
C7 C6 H6A 109.7 . . ?
N2 C6 H6B 109.7 . . ?
C7 C6 H6B 109.7 . . ?
H6A C6 H6B 108.2 . . ?
O5 C7 C6 109.7(3) . . ?
O5 C7 H7A 109.7 . . ?
C6 C7 H7A 109.7 . . ?
O5 C7 H7B 109.7 . . ?
C6 C7 H7B 109.7 . . ?
H7A C7 H7B 108.2 . . ?
C7 O5 Fe4 118.0(2) . . ?
C7 O5 Fe2 111.0(2) . . ?
Fe4 O5 Fe2 99.95(10) . . ?
C7 O5 Y2 129.8(2) . . ?
Fe4 O5 Y2 94.91(8) . . ?
Fe2 O5 Y2 97.89(8) . . ?
C9 C8 N2 110.1(3) . . ?
C9 C8 H8A 109.6 . . ?
N2 C8 H8A 109.6 . . ?
C9 C8 H8B 109.6 . . ?
N2 C8 H8B 109.6 . . ?
H8A C8 H8B 108.1 . . ?
O6 C9 C8 108.6(3) . . ?
O6 C9 H9A 110.0 . . ?
C8 C9 H9A 110.0 . . ?
O6 C9 H9B 110.0 . . ?
C8 C9 H9B 110.0 . . ?
H9A C9 H9B 108.4 . . ?
C9 O6 Fe2 111.3(2) . . ?
C9 O6 Y1 130.8(2) . . ?
Fe2 O6 Y1 102.53(9) . . ?
N2 C10 H10A 109.5 . . ?
N2 C10 H10B 109.5 . . ?
H10A C10 H10B 109.5 . . ?
N2 C10 H10C 109.5 . . ?
H10A C10 H10C 109.5 . . ?
H10B C10 H10C 109.5 . . ?
C15 N3 C13 110.6(4) . . ?
C15 N3 C11 109.8(4) . . ?
C13 N3 C11 111.7(4) . . ?
C15 N3 Fe3 112.9(3) . . ?
C13 N3 Fe3 106.6(2) . . ?
C11 N3 Fe3 105.2(2) . . ?
N3 C11 C12 111.9(3) . . ?
N3 C11 H11A 109.2 . . ?
C12 C11 H11A 109.2 . . ?
N3 C11 H11B 109.2 . . ?
C12 C11 H11B 109.2 . . ?
H11A C11 H11B 107.9 . . ?
O7 C12 C11 110.5(3) . . ?
O7 C12 H12A 109.5 . . ?
C11 C12 H12A 109.5 . . ?
O7 C12 H12B 109.5 . . ?
C11 C12 H12B 109.5 . . ?
H12A C12 H12B 108.1 . . ?
C12 O7 Fe1 127.7(2) . . ?
C12 O7 Fe3 117.0(2) . . ?
Fe1 O7 Fe3 104.09(10) . . ?
C14B C13 N3 117.0(8) . . ?
N3 C13 C14A 113.5(4) . . ?
N3 C13 H13A 108.9 . . ?
C14A C13 H13A 108.9 . . ?
N3 C13 H13B 108.9 . . ?
C14A C13 H13B 108.9 . . ?
H13A C13 H13B 107.7 . . ?
C14B C13 H13C 108.0 . . ?
N3 C13 H13C 108.0 . . ?
C14B C13 H13D 108.0 . . ?
N3 C13 H13D 108.0 . . ?
H13C C13 H13D 107.3 . . ?
O8 C14A C13 108.6(4) . . ?
O8 C14A H14A 110.0 . . ?
C13 C14A H14A 110.0 . . ?
O8 C14A H14B 110.0 . . ?
C13 C14A H14B 110.0 . . ?
H14A C14A H14B 108.3 . . ?
C13 C14B O8 112.9(11) . . ?
C13 C14B H14C 109.0 . . ?
O8 C14B H14C 109.0 . . ?
C13 C14B H14D 109.0 . . ?
O8 C14B H14D 109.0 . . ?
H14C C14B H14D 107.8 . . ?
C14A O8 Fe3 115.8(3) . . ?
C14B O8 Fe3 116.7(7) . . ?
C14A O8 Y1 132.8(3) . . ?
C14B O8 Y1 127.4(7) . . ?
Fe3 O8 Y1 109.52(10) . . ?
N3 C15 H15A 109.5 . . ?
N3 C15 H15B 109.5 . . ?
H15A C15 H15B 109.5 . . ?
N3 C15 H15C 109.5 . . ?
H15A C15 H15C 109.5 . . ?
H15B C15 H15C 109.5 . . ?
C20 N4 C16 111.4(3) . . ?
C20 N4 C18 110.4(4) . . ?
C16 N4 C18 111.4(4) . . ?
C20 N4 Fe4 113.2(3) . . ?
C16 N4 Fe4 103.8(2) . . ?
C18 N4 Fe4 106.5(2) . . ?
N4 C16 C17 111.4(3) . . ?
N4 C16 H16A 109.4 . . ?
C17 C16 H16A 109.4 . . ?
N4 C16 H16B 109.4 . . ?
C17 C16 H16B 109.4 . . ?
H16A C16 H16B 108.0 . . ?
O9 C17 C16 108.2(3) . . ?
O9 C17 H17A 110.1 . . ?
C16 C17 H17A 110.1 . . ?
O9 C17 H17B 110.1 . . ?
C16 C17 H17B 110.1 . . ?
H17A C17 H17B 108.4 . . ?
C17 O9 Fe2 126.3(2) . . ?
C17 O9 Fe4 116.2(2) . . ?
Fe2 O9 Fe4 104.78(11) . . ?
C19 C18 N4 109.4(4) . . ?
C19 C18 H18A 109.8 . . ?
N4 C18 H18A 109.8 . . ?
C19 C18 H18B 109.8 . . ?
N4 C18 H18B 109.8 . . ?
H18A C18 H18B 108.2 . . ?
O10 C19 C18 107.7(3) . . ?
O10 C19 H19A 110.2 . . ?
C18 C19 H19A 110.2 . . ?
O10 C19 H19B 110.2 . . ?
C18 C19 H19B 110.2 . . ?
H19A C19 H19B 108.5 . . ?
C19 O10 Fe4 114.6(2) . . ?
C19 O10 Y2 134.5(2) . . ?
Fe4 O10 Y2 109.55(10) . . ?
N4 C20 H20A 109.5 . . ?
N4 C20 H20B 109.5 . . ?
H20A C20 H20B 109.5 . . ?
N4 C20 H20C 109.5 . . ?
H20A C20 H20C 109.5 . . ?
H20B C20 H20C 109.5 . . ?
C21 O11 Fe1 124.8(2) . . ?
C21 O12 Y2 140.7(2) . . ?
O12 C21 O11 124.0(3) . . ?
O12 C21 C22 119.2(3) . . ?
O11 C21 C22 116.8(3) . . ?
C24 C22 C23 109.1(5) . . ?
C24 C22 C25 112.9(4) . . ?
C23 C22 C25 107.8(4) . . ?
C24 C22 C21 110.0(3) . . ?
C23 C22 C21 109.7(3) . . ?
C25 C22 C21 107.2(3) . . ?
C22 C23 H23A 109.5 . . ?
C22 C23 H23B 109.5 . . ?
H23A C23 H23B 109.5 . . ?
C22 C23 H23C 109.5 . . ?
H23A C23 H23C 109.5 . . ?
H23B C23 H23C 109.5 . . ?
C22 C24 H24A 109.5 . . ?
C22 C24 H24B 109.5 . . ?
H24A C24 H24B 109.5 . . ?
C22 C24 H24C 109.5 . . ?
H24A C24 H24C 109.5 . . ?
H24B C24 H24C 109.5 . . ?
C22 C25 H25A 109.5 . . ?
C22 C25 H25B 109.5 . . ?
H25A C25 H25B 109.5 . . ?
C22 C25 H25C 109.5 . . ?
H25A C25 H25C 109.5 . . ?
H25B C25 H25C 109.5 . . ?
C26 O13 Y1 137.7(2) . . ?
C26 O14 Fe2 125.9(2) . . ?
O13 C26 O14 124.8(3) . . ?
O13 C26 C27 120.6(3) . . ?
O14 C26 C27 114.6(3) . . ?
C28A C27 C29A 116.9(6) . . ?
C30B C27 C26 116.6(7) . . ?
C28A C27 C26 114.5(6) . . ?
C29A C27 C26 112.9(5) . . ?
C30B C27 C28B 114.2(7) . . ?
C26 C27 C28B 111.1(5) . . ?
C30B C27 C29B 109.3(7) . . ?
C26 C27 C29B 101.3(6) . . ?
C28B C27 C29B 102.6(6) . . ?
C28A C27 C30A 106.6(6) . . ?
C29A C27 C30A 102.4(5) . . ?
C26 C27 C30A 101.4(5) . . ?
C27 C28A H28A 109.5 . . ?
C27 C28A H28B 109.5 . . ?
H28A C28A H28B 109.5 . . ?
C27 C28A H28C 109.5 . . ?
H28A C28A H28C 109.5 . . ?
H28B C28A H28C 109.5 . . ?
C27 C29A H29A 109.5 . . ?
C27 C29A H29B 109.5 . . ?
H29A C29A H29B 109.5 . . ?
C27 C29A H29C 109.5 . . ?
H29A C29A H29C 109.5 . . ?
H29B C29A H29C 109.5 . . ?
C27 C30A H30A 109.5 . . ?
C27 C30A H30B 109.5 . . ?
H30A C30A H30B 109.5 . . ?
C27 C30A H30C 109.5 . . ?
H30A C30A H30C 109.5 . . ?
H30B C30A H30C 109.5 . . ?
C27 C28B H28D 109.5 . . ?
C27 C28B H28E 109.5 . . ?
H28D C28B H28E 109.5 . . ?
C27 C28B H28F 109.5 . . ?
H28D C28B H28F 109.5 . . ?
H28E C28B H28F 109.5 . . ?
C27 C29B H29D 109.5 . . ?
C27 C29B H29E 109.5 . . ?
H29D C29B H29E 109.5 . . ?
C27 C29B H29F 109.5 . . ?
H29D C29B H29F 109.5 . . ?
H29E C29B H29F 109.5 . . ?
C27 C30B H30D 109.5 . . ?
C27 C30B H30E 109.5 . . ?
H30D C30B H30E 109.5 . . ?
C27 C30B H30F 109.5 . . ?
H30D C30B H30F 109.5 . . ?
H30E C30B H30F 109.5 . . ?
C31 O15 Fe3 127.7(2) . . ?
C31 O16 Y1 136.5(2) . . ?
O16 C31 O15 124.5(3) . . ?
O16 C31 C32 119.4(4) . . ?
O15 C31 C32 116.1(3) . . ?
C34A C32 C35A 111.3(7) . . ?
C34A C32 C31 112.0(5) . . ?
C35A C32 C31 108.6(5) . . ?
C33B C32 C31 112.0(8) . . ?
C33B C32 C35B 104.0(10) . . ?
C31 C32 C35B 104.3(7) . . ?
C34A C32 C33A 110.5(6) . . ?
C35A C32 C33A 106.0(6) . . ?
C31 C32 C33A 108.2(5) . . ?
C33B C32 C34B 115.7(9) . . ?
C31 C32 C34B 109.5(7) . . ?
C35B C32 C34B 110.8(9) . . ?
C32 C33A H33A 109.5 . . ?
C32 C33A H33B 109.5 . . ?
H33A C33A H33B 109.5 . . ?
C32 C33A H33C 109.5 . . ?
H33A C33A H33C 109.5 . . ?
H33B C33A H33C 109.5 . . ?
C32 C34A H34A 109.5 . . ?
C32 C34A H34B 109.5 . . ?
H34A C34A H34B 109.5 . . ?
C32 C34A H34C 109.5 . . ?
H34A C34A H34C 109.5 . . ?
H34B C34A H34C 109.5 . . ?
C32 C35A H35A 109.5 . . ?
C32 C35A H35B 109.5 . . ?
H35A C35A H35B 109.5 . . ?
C32 C35A H35C 109.5 . . ?
H35A C35A H35C 109.5 . . ?
H35B C35A H35C 109.5 . . ?
C32 C33B H33D 109.5 . . ?
C32 C33B H33E 109.5 . . ?
H33D C33B H33E 109.5 . . ?
C32 C33B H33F 109.5 . . ?
H33D C33B H33F 109.5 . . ?
H33E C33B H33F 109.5 . . ?
C32 C34B H34D 109.5 . . ?
C32 C34B H34E 109.5 . . ?
H34D C34B H34E 109.5 . . ?
C32 C34B H34F 109.5 . . ?
H34D C34B H34F 109.5 . . ?
H34E C34B H34F 109.5 . . ?
C32 C35B H35D 109.5 . . ?
C32 C35B H35E 109.5 . . ?
H35D C35B H35E 109.5 . . ?
C32 C35B H35F 109.5 . . ?
H35D C35B H35F 109.5 . . ?
H35E C35B H35F 109.5 . . ?
C36 O17 Fe4 128.0(2) . . ?
C36 O18 Y2 136.8(2) . . ?
O18 C36 O17 125.7(3) . . ?
O18 C36 C37 118.6(3) . . ?
O17 C36 C37 115.6(3) . . ?
C38 C37 C40 110.6(6) . . ?
C38 C37 C39 112.2(5) . . ?
C40 C37 C39 106.0(5) . . ?
C38 C37 C36 112.0(4) . . ?
C40 C37 C36 106.1(4) . . ?
C39 C37 C36 109.5(4) . . ?
C37 C38 H38A 109.5 . . ?
C37 C38 H38B 109.5 . . ?
H38A C38 H38B 109.5 . . ?
C37 C38 H38C 109.5 . . ?
H38A C38 H38C 109.5 . . ?
H38B C38 H38C 109.5 . . ?
C37 C39 H39A 109.5 . . ?
C37 C39 H39B 109.5 . . ?
H39A C39 H39B 109.5 . . ?
C37 C39 H39C 109.5 . . ?
H39A C39 H39C 109.5 . . ?
H39B C39 H39C 109.5 . . ?
C37 C40 H40A 109.5 . . ?
C37 C40 H40B 109.5 . . ?
H40A C40 H40B 109.5 . . ?
C37 C40 H40C 109.5 . . ?
H40A C40 H40C 109.5 . . ?
H40B C40 H40C 109.5 . . ?
C41 O19 Y1 135.7(2) . . ?
O20 C41 O19 124.3(3) . . ?
O20 C41 C42 119.5(3) . . ?
O19 C41 C42 116.2(3) . . ?
C44 C42 C45 109.5(4) . . ?
C44 C42 C43 111.0(4) . . ?
C45 C42 C43 108.5(5) . . ?
C44 C42 C41 111.8(3) . . ?
C45 C42 C41 107.6(4) . . ?
C43 C42 C41 108.3(3) . . ?
C42 C43 H43A 109.5 . . ?
C42 C43 H43B 109.5 . . ?
H43A C43 H43B 109.5 . . ?
C42 C43 H43C 109.5 . . ?
H43A C43 H43C 109.5 . . ?
H43B C43 H43C 109.5 . . ?
C42 C44 H44A 109.5 . . ?
C42 C44 H44B 109.5 . . ?
H44A C44 H44B 109.5 . . ?
C42 C44 H44C 109.5 . . ?
H44A C44 H44C 109.5 . . ?
H44B C44 H44C 109.5 . . ?
C42 C45 H45A 109.5 . . ?
C42 C45 H45B 109.5 . . ?
H45A C45 H45B 109.5 . . ?
C42 C45 H45C 109.5 . . ?
H45A C45 H45C 109.5 . . ?
H45B C45 H45C 109.5 . . ?
C46 O21 Y2 138.3(2) . . ?
O22 C46 O21 123.9(3) . . ?
O22 C46 C47 120.4(3) . . ?
O21 C46 C47 115.7(3) . . ?
C48 C47 C50 107.9(5) . . ?
C48 C47 C49 111.4(5) . . ?
C50 C47 C49 109.6(5) . . ?
C48 C47 C46 108.3(4) . . ?
C50 C47 C46 107.9(4) . . ?
C49 C47 C46 111.6(4) . . ?
C47 C48 H48A 109.5 . . ?
C47 C48 H48B 109.5 . . ?
H48A C48 H48B 109.5 . . ?
C47 C48 H48C 109.5 . . ?
H48A C48 H48C 109.5 . . ?
H48B C48 H48C 109.5 . . ?
C47 C49 H49A 109.5 . . ?
C47 C49 H49B 109.5 . . ?
H49A C49 H49B 109.5 . . ?
C47 C49 H49C 109.5 . . ?
H49A C49 H49C 109.5 . . ?
H49B C49 H49C 109.5 . . ?
C47 C50 H50A 109.5 . . ?
C47 C50 H50B 109.5 . . ?
H50A C50 H50B 109.5 . . ?
C47 C50 H50C 109.5 . . ?
H50A C50 H50C 109.5 . . ?
H50B C50 H50C 109.5 . . ?
N12 N11 Fe3 130.0(3) . . ?
N13 N12 N11 177.4(5) . . ?
N22 N21 Fe4 126.8(3) . . ?
N23 N22 N21 176.6(4) . . ?
C61A O61A H61A 109.5 . . ?
O61A C61A C62A 119.2(6) . . ?
O61A C61A C66A 120.7(6) . . ?
C62A C61A C66A 120.0 . . ?
C63A C62A C61A 120.0 . . ?
C63A C62A H62A 120.0 . . ?
C61A C62A H62A 120.0 . . ?
C62A C63A C64A 120.0 . . ?
C62A C63A H63A 120.0 . . ?
C64A C63A H63A 120.0 . . ?
C65A C64A C63A 120.0 . . ?
C65A C64A H64A 120.0 . . ?
C63A C64A H64A 120.0 . . ?
C64A C65A C66A 120.0 . . ?
C64A C65A H65A 120.0 . . ?
C66A C65A H65A 120.0 . . ?
C65A C66A C61A 120.0 . . ?
C65A C66A H66A 120.0 . . ?
C61A C66A H66A 120.0 . . ?
C61B O61B H61B 109.5 . . ?
O61B C61B C62B 118.4(13) . . ?
O61B C61B C66B 121.6(13) . . ?
C62B C61B C66B 120.0 . . ?
C61B C62B C63B 120.0 . . ?
C61B C62B H62B 120.0 . . ?
C63B C62B H62B 120.0 . . ?
C64B C63B C62B 120.0 . . ?
C64B C63B H63B 120.0 . . ?
C62B C63B H63B 120.0 . . ?
C63B C64B C65B 120.0 . . ?
C63B C64B H64B 120.0 . . ?
C65B C64B H64B 120.0 . . ?
C66B C65B C64B 120.0 . . ?
C66B C65B H65B 120.0 . . ?
C64B C65B H65B 120.0 . . ?
C65B C66B C61B 120.0 . . ?
C65B C66B H66B 120.0 . . ?
C61B C66B H66B 120.0 . . ?
 
loop_
 _geom_hbond_atom_site_label_D 
 _geom_hbond_atom_site_label_H 
 _geom_hbond_atom_site_label_A 
 _geom_hbond_distance_DH 
 _geom_hbond_distance_HA 
 _geom_hbond_distance_DA 
 _geom_hbond_angle_DHA 
 _geom_hbond_site_symmetry_A 
O1 H1 O22  0.85(3) 1.86(3) 2.693(3) 166(4) .
O2 H2 O20  0.86(3) 1.80(3) 2.632(3) 161(4) .
O61A H61A O22  0.84 1.88 2.708(5) 171.1 .
O61B H61B O20  0.84 1.95 2.750(12) 159.5 2_545
 
_refine_diff_density_max    0.708
_refine_diff_density_min   -0.576
_refine_diff_density_rms    0.091

_shelxl_version_number 2013-2

_shelx_res_file
;
TITL FKFe4Y2 in P2(1)/c
CELL 0.71073  19.1485  16.4725  24.7967  90.000 101.162  90.000
ZERR    4.00   0.0018   0.0010   0.0021   0.000   0.011   0.000
LATT  1
SYMM -X, 0.5+Y, 0.5-Z
SFAC C H N O FE Y
UNIT 224 424 40 92 16 8
LIST 4
TEMP -73
SIZE 0.28 0.24 0.21
EQIV $1 -x, y-1/2, -z+1/2
OMIT 7 1 25
OMIT -1 1 2
OMIT 0 1 2
OMIT 1 0 2
L.S. 16
ACTA 50.5
BOND $H
HTAB O1 O22
HTAB O2 O20
HTAB O61A O22
HTAB O61B O20_$1
RTAB M..M Y1 Y2
RTAB M..M Y1 FE1
RTAB M..M Y1 FE2
RTAB M..M Y1 FE3
RTAB M..M Y2 FE1
RTAB M..M Y2 FE2
RTAB M..M Y2 FE4
RTAB M..M FE1 FE3
RTAB M..M FE2 FE4
FMAP 2
PLAN 20
DFIX 0.92 0.04 O1 H1 O2 H2
DELU C13 C14A O8

SADI C27 C28A C27 C29A C27 C30A C27 C28B C27 C29B C27 C30B
SADI C28A C29A C29A C30A C30A C28A C28B C29B C29B C30B C30B C28B
SADI C32 C33A C32 C34A C32 C35A C32 C33B C32 C34B C32 C35B
ISOR C4B
DELU O61A > C66A
DELU O61B > C66B
WGHT    0.071100
FVAR       0.11319
Y1    6    0.251572    0.434181    0.221765    11.00000    0.02057    0.01471 =
         0.01881   -0.00106    0.00343   -0.00116
Y2    6    0.266504    0.625935    0.312969    11.00000    0.02319    0.01521 =
         0.01605    0.00085    0.00554    0.00034
FE1   5    0.328197    0.444759    0.363351    11.00000    0.02142    0.01792 =
         0.01790   -0.00004    0.00177    0.00320
FE2   5    0.301491    0.613708    0.178500    11.00000    0.01995    0.01739 =
         0.01614    0.00005    0.00537   -0.00143
FE3   5    0.308940    0.271602    0.308383    11.00000    0.02289    0.01562 =
         0.02671    0.00155    0.00488    0.00042
FE4   5    0.291870    0.787213    0.230686    11.00000    0.02776    0.01592 =
         0.02205    0.00213    0.00843   -0.00154
O1    4    0.245185    0.481328    0.311569    11.00000    0.01794    0.01745 =
         0.01933    0.00079    0.00456    0.00107
H1    2    0.205491    0.477654    0.321731    11.00000   -1.20000
O2    4    0.233799    0.577390    0.222518    11.00000    0.01738    0.01720 =
         0.01918   -0.00055    0.00529   -0.00168
H2    2    0.189318    0.585156    0.209272    11.00000   -1.20000
N1    3    0.442918    0.426824    0.396044    11.00000    0.02773    0.02464 =
         0.03662   -0.00590   -0.01000    0.00527
C1    1    0.470111    0.375031    0.356125    11.00000    0.02009    0.03399 =
         0.03527    0.00373    0.00411    0.00238
AFIX  23
H1A   2    0.466662    0.317346    0.366505    11.00000   -1.20000
H1B   2    0.520941    0.387652    0.357346    11.00000   -1.20000
AFIX   0
C2    1    0.428516    0.387833    0.297879    11.00000    0.01736    0.03227 =
         0.03253    0.00330    0.00729    0.00125
AFIX  23
H2A   2    0.439407    0.442080    0.284431    11.00000   -1.20000
H2B   2    0.442519    0.346385    0.273077    11.00000   -1.20000
AFIX   0
O3    4    0.353654    0.381585    0.297701    11.00000    0.01849    0.01957 =
         0.02417   -0.00070    0.00700    0.00108
SADI C3A C4A C3B C4B
PART 1
DELU N1 C3A > O4
C3A   1    0.481792    0.509544    0.388262    10.58000    0.01735    0.02352 =
         0.04841   -0.00448   -0.00638   -0.00224
AFIX  23
H3A1  2    0.520732    0.519317    0.420188    10.58000   -1.20000
H3A2  2    0.502610    0.507030    0.354734    10.58000   -1.20000
AFIX   0
C4A   1    0.428164    0.577156    0.383292    10.58000    0.02178    0.02422 =
         0.03438    0.00161   -0.00310   -0.00147
AFIX  23
H4A1  2    0.414875    0.587999    0.419263    10.58000   -1.20000
H4A2  2    0.447872    0.627536    0.370397    10.58000   -1.20000
AFIX   0
PART 2
C3B   1    0.463731    0.506343    0.413547    10.42000    0.02148    0.02907 =
         0.03383   -0.00391    0.00325   -0.00069
AFIX  23
H3B1  2    0.515811    0.509056    0.427156    10.42000   -1.20000
H3B2  2    0.439372    0.523742    0.443369    10.42000   -1.20000
AFIX   0
C4B   1    0.442172    0.559268    0.363692    10.42000    0.01783    0.01513 =
         0.03995   -0.01538   -0.00002   -0.00622
AFIX  23
H4B1  2    0.453554    0.616704    0.373386    10.42000   -1.20000
H4B2  2    0.468485    0.543035    0.334758    10.42000   -1.20000
AFIX   0
PART 0
O4    4    0.367362    0.550178    0.344050    11.00000    0.01820    0.02584 =
         0.02300    0.00149    0.00050   -0.00022
C5    1    0.454826    0.387386    0.450414    11.00000    0.05008    0.10045 =
         0.02733   -0.00660   -0.00991    0.03697
AFIX  33
H5A   2    0.438797    0.330832    0.446276    11.00000   -1.50000
H5B   2    0.427927    0.416215    0.474319    11.00000   -1.50000
H5C   2    0.505671    0.388891    0.466795    11.00000   -1.50000
AFIX   0
N2    3    0.407924    0.633426    0.159739    11.00000    0.02479    0.02668 =
         0.03042    0.00262    0.01324   -0.00099
C6    1    0.443147    0.694777    0.199603    11.00000    0.02303    0.03283 =
         0.04140   -0.00323    0.01334   -0.00578
AFIX  23
H6A   2    0.428880    0.749947    0.185897    11.00000   -1.20000
H6B   2    0.495462    0.690167    0.203724    11.00000   -1.20000
AFIX   0
C7    1    0.422160    0.681675    0.254429    11.00000    0.01900    0.04143 =
         0.03499   -0.00394    0.00188    0.00040
AFIX  23
H7A   2    0.442278    0.629756    0.270556    11.00000   -1.20000
H7B   2    0.441502    0.726077    0.279887    11.00000   -1.20000
AFIX   0
O5    4    0.346251    0.679892    0.247524    11.00000    0.01829    0.01961 =
         0.02170   -0.00083    0.00215   -0.00128
C8    1    0.447646    0.554508    0.170182    11.00000    0.03193    0.03117 =
         0.05127    0.00312    0.02299    0.00511
AFIX  23
H8A   2    0.477103    0.546224    0.141942    11.00000   -1.20000
H8B   2    0.479750    0.556272    0.206620    11.00000   -1.20000
AFIX   0
C9    1    0.396634    0.485887    0.168495    11.00000    0.03266    0.02976 =
         0.03770    0.00018    0.01917    0.00888
AFIX  23
H9A   2    0.372632    0.475210    0.130079    11.00000   -1.20000
H9B   2    0.422364    0.436105    0.183311    11.00000   -1.20000
AFIX   0
O6    4    0.345439    0.506993    0.200703    11.00000    0.02102    0.02168 =
         0.02152    0.00018    0.00869    0.00085
C10   1    0.403128    0.661561    0.103327    11.00000    0.04302    0.06526 =
         0.03300    0.01224    0.01854   -0.00634
AFIX  33
H10A  2    0.380964    0.619367    0.077780    11.00000   -1.50000
H10B  2    0.450988    0.673180    0.096783    11.00000   -1.50000
H10C  2    0.374211    0.711028    0.097538    11.00000   -1.50000
AFIX   0
N3    3    0.225768    0.198679    0.337012    11.00000    0.03165    0.02640 =
         0.03940    0.00989    0.00454   -0.00702
C11   1    0.233241    0.218130    0.396201    11.00000    0.05656    0.04728 =
         0.04710    0.01241    0.02089   -0.01156
AFIX  23
H11A  2    0.271443    0.184172    0.417641    11.00000   -1.20000
H11B  2    0.188263    0.204796    0.408302    11.00000   -1.20000
AFIX   0
C12   1    0.250513    0.305696    0.407732    11.00000    0.06442    0.04515 =
         0.03793    0.00018    0.03049   -0.00994
AFIX  23
H12A  2    0.206870    0.338740    0.396867    11.00000   -1.20000
H12B  2    0.268287    0.313354    0.447628    11.00000   -1.20000
AFIX   0
O7    4    0.302737    0.332091    0.378374    11.00000    0.02962    0.01959 =
         0.02563    0.00369    0.00959    0.00120
C13   1    0.157192    0.226160    0.305274    11.00000    0.03218    0.07427 =
         0.07011    0.03791   -0.00601   -0.02107
PART   1
AFIX  23
H13A  2    0.135096    0.263837    0.328188    10.76000   -1.20000
H13B  2    0.125269    0.178692    0.296664    10.76000   -1.20000
AFIX  23
PART   2
H13C  2    0.139687    0.184440    0.277162    10.24000   -1.20000
H13D  2    0.122883    0.228680    0.330403    10.24000   -1.20000
AFIX   0
PART   1
C14A  1    0.163027    0.267477    0.253398    10.76000    0.02499    0.03270 =
         0.05490    0.00855    0.00236   -0.01239
AFIX  23
H14A  2    0.167901    0.226800    0.224969    10.76000   -1.20000
H14B  2    0.119632    0.299935    0.239969    10.76000   -1.20000
AFIX   0
PART   2
C14B  1    0.156252    0.299368    0.279335    10.24000    0.03017
AFIX  23
H14C  2    0.145158    0.342508    0.304173    10.24000   -1.20000
H14D  2    0.117885    0.299039    0.246232    10.24000   -1.20000
AFIX   0
PART   0
O8    4    0.222806    0.318164    0.263248    11.00000    0.02240    0.02137 =
         0.03176    0.00550    0.00086   -0.00581
C15   1    0.234533    0.111126    0.330043    11.00000    0.07610    0.02432 =
         0.10092    0.00162    0.02985   -0.01431
AFIX  33
H15A  2    0.231622    0.098862    0.290998    11.00000   -1.50000
H15B  2    0.196805    0.081938    0.343612    11.00000   -1.50000
H15C  2    0.281032    0.094051    0.350860    11.00000   -1.50000
AFIX   0
N4    3    0.194406    0.855385    0.193541    11.00000    0.04201    0.02814 =
         0.03218    0.01154    0.01411    0.01619
C16   1    0.182804    0.833263    0.135003    11.00000    0.04460    0.03495 =
         0.03209    0.01400    0.00926    0.00804
AFIX  23
H16A  2    0.215012    0.865632    0.116662    11.00000   -1.20000
H16B  2    0.133192    0.846390    0.117330    11.00000   -1.20000
AFIX   0
C17   1    0.196258    0.744595    0.127628    11.00000    0.02971    0.03026 =
         0.03008    0.01026   -0.00179    0.00377
AFIX  23
H17A  2    0.158269    0.711824    0.139029    11.00000   -1.20000
H17B  2    0.196456    0.732849    0.088503    11.00000   -1.20000
AFIX   0
O9    4    0.263615    0.724606    0.160653    11.00000    0.02490    0.02167 =
         0.01934    0.00351    0.00455    0.00034
C18   1    0.136097    0.824075    0.219913    11.00000    0.03730    0.07612 =
         0.04730    0.02583    0.02244    0.02608
AFIX  23
H18A  2    0.101682    0.868094    0.222451    11.00000   -1.20000
H18B  2    0.110488    0.779739    0.197373    11.00000   -1.20000
AFIX   0
C19   1    0.166727    0.793456    0.275587    11.00000    0.04509    0.04274 =
         0.05445    0.02091    0.02819    0.02187
AFIX  23
H19A  2    0.184153    0.839276    0.300401    11.00000   -1.20000
H19B  2    0.130100    0.763719    0.290938    11.00000   -1.20000
AFIX   0
O10   4    0.222917    0.741715    0.270904    11.00000    0.02842    0.02150 =
         0.02902    0.00724    0.01385    0.00601
C20   1    0.201923    0.943733    0.201214    11.00000    0.09016    0.03172 =
         0.05983    0.00545    0.01514    0.02748
AFIX  33
H20A  2    0.209197    0.956558    0.240498    11.00000   -1.50000
H20B  2    0.158673    0.970734    0.181845    11.00000   -1.50000
H20C  2    0.242908    0.962760    0.186412    11.00000   -1.50000
AFIX   0
O11   4    0.305629    0.482433    0.433801    11.00000    0.04013    0.02501 =
         0.01938    0.00159    0.00790    0.00547
O12   4    0.263500    0.603971    0.405248    11.00000    0.04405    0.02727 =
         0.01843    0.00371    0.01246    0.00659
C21   1    0.279873    0.552336    0.441594    11.00000    0.02766    0.02785 =
         0.02142   -0.00015    0.00735   -0.00091
C22   1    0.269137    0.571048    0.499503    11.00000    0.04502    0.03400 =
         0.01780    0.00207    0.01141    0.00000
C23   1    0.333293    0.542974    0.540864    11.00000    0.07458    0.12170 =
         0.02509   -0.00536   -0.00064    0.01264
AFIX  33
H23A  2    0.375300    0.573817    0.535772    11.00000   -1.50000
H23B  2    0.341302    0.485029    0.535471    11.00000   -1.50000
H23C  2    0.324851    0.551882    0.578151    11.00000   -1.50000
AFIX   0
C24   1    0.259650    0.660771    0.506019    11.00000    0.18384    0.04270 =
         0.05024   -0.00523    0.06630    0.00403
AFIX  33
H24A  2    0.218024    0.679282    0.479396    11.00000   -1.50000
H24B  2    0.302161    0.689337    0.499546    11.00000   -1.50000
H24C  2    0.252573    0.672250    0.543367    11.00000   -1.50000
AFIX   0
C25   1    0.205556    0.522209    0.508831    11.00000    0.07586    0.09080 =
         0.05241   -0.01273    0.04036   -0.02047
AFIX  33
H25A  2    0.163099    0.539360    0.482547    11.00000   -1.50000
H25B  2    0.198113    0.531268    0.546370    11.00000   -1.50000
H25C  2    0.214299    0.464386    0.503615    11.00000   -1.50000
AFIX   0
O13   4    0.217580    0.456646    0.125418    11.00000    0.03730    0.03025 =
         0.01817    0.00029    0.00010   -0.00343
O14   4    0.256572    0.578037    0.104391    11.00000    0.03726    0.02791 =
         0.01876   -0.00083    0.00284   -0.00464
C26   1    0.226001    0.509313    0.091936    11.00000    0.03447    0.03254 =
         0.02238   -0.00613    0.00351    0.00139
C27   1    0.199902    0.495720    0.030582    11.00000    0.09641    0.04299 =
         0.01614   -0.00244   -0.00789   -0.01139
PART   1
C28A  1    0.150591    0.427538    0.017063    10.58000    0.07044
AFIX  33
H28A  2    0.136314    0.422862   -0.022957    10.58000   -1.50000
H28B  2    0.108366    0.436839    0.033120    10.58000   -1.50000
H28C  2    0.174081    0.377266    0.031974    10.58000   -1.50000
AFIX   0
C29A  1    0.180395    0.574100   -0.000829    10.58000    0.07543
AFIX  33
H29A  2    0.216892    0.615183    0.011876    10.58000   -1.50000
H29B  2    0.134257    0.593389    0.005538    10.58000   -1.50000
H29C  2    0.177431    0.564370   -0.040196    10.58000   -1.50000
AFIX   0
C30A  1    0.273913    0.469343    0.011131    10.58000    0.06711
AFIX  33
H30A  2    0.308728    0.513404    0.019416    10.58000   -1.50000
H30B  2    0.264107    0.458690   -0.028501    10.58000   -1.50000
H30C  2    0.293090    0.420186    0.030866    10.58000   -1.50000
AFIX   0
PART   2
C28B  1    0.170928    0.407981    0.018844    10.42000    0.03054
AFIX  33
H28D  2    0.139164    0.394534    0.044146    10.42000   -1.50000
H28E  2    0.210810    0.369645    0.024106    10.42000   -1.50000
H28F  2    0.144555    0.404476   -0.019118    10.42000   -1.50000
AFIX   0
C29B  1    0.128013    0.549866    0.019234    10.42000    0.06939
AFIX  33
H29D  2    0.096349    0.531905    0.043555    10.42000   -1.50000
H29E  2    0.103905    0.543345   -0.019149    10.42000   -1.50000
H29F  2    0.140257    0.607131    0.026425    10.42000   -1.50000
AFIX   0
C30B  1    0.246001    0.522256   -0.004900    10.42000    0.06825
AFIX  33
H30D  2    0.223842    0.510737   -0.043163    10.42000   -1.50000
H30E  2    0.291515    0.493435    0.004430    10.42000   -1.50000
H30F  2    0.254237    0.580781   -0.000282    10.42000   -1.50000
AFIX   0
PART   0
O15   4    0.330461    0.224840    0.239144    11.00000    0.04750    0.02287 =
         0.03259   -0.00517    0.00778    0.00762
O16   4    0.304999    0.329013    0.181857    11.00000    0.04789    0.02247 =
         0.03046   -0.00403    0.01379    0.00292
C31   1    0.317738    0.255948    0.191521    11.00000    0.03471    0.02328 =
         0.03470   -0.00372    0.00968    0.00324
C32   1    0.319633    0.198020    0.143938    11.00000    0.05843    0.02979 =
         0.03387   -0.00962    0.00879    0.00740
PART   1
C33A  1    0.394764    0.160976    0.151795    10.58000    0.05326
AFIX  33
H33A  2    0.397088    0.123370    0.121569    10.58000   -1.50000
H33B  2    0.405211    0.131586    0.186795    10.58000   -1.50000
H33C  2    0.429805    0.204399    0.152022    10.58000   -1.50000
AFIX   0
C34A  1    0.300747    0.240046    0.089015    10.58000    0.05925
AFIX  33
H34A  2    0.302486    0.200839    0.059579    10.58000   -1.50000
H34B  2    0.334830    0.283885    0.087247    10.58000   -1.50000
H34C  2    0.252653    0.262725    0.084528    10.58000   -1.50000
AFIX   0
C35A  1    0.269581    0.127706    0.147782    10.58000    0.07707
AFIX  33
H35A  2    0.270304    0.089906    0.117376    10.58000   -1.50000
H35B  2    0.221140    0.148417    0.145622    10.58000   -1.50000
H35C  2    0.284987    0.099403    0.182829    10.58000   -1.50000
AFIX   0
PART   2
C33B  1    0.367492    0.125127    0.161627    10.42000    0.08919
AFIX  33
H33D  2    0.367106    0.089315    0.130011    10.42000   -1.50000
H33E  2    0.349974    0.095348    0.190543    10.42000   -1.50000
H33F  2    0.416200    0.143803    0.175711    10.42000   -1.50000
AFIX   0
C34B  1    0.335751    0.246224    0.094328    10.42000    0.07011
AFIX  33
H34D  2    0.336927    0.208970    0.063703    10.42000   -1.50000
H34E  2    0.381998    0.273241    0.104738    10.42000   -1.50000
H34F  2    0.298554    0.287044    0.083068    10.42000   -1.50000
AFIX   0
C35B  1    0.244703    0.161866    0.130853    10.42000    0.07387
AFIX  33
H35D  2    0.241463    0.123212    0.100426    10.42000   -1.50000
H35E  2    0.209878    0.205443    0.120373    10.42000   -1.50000
H35F  2    0.234746    0.133771    0.163376    10.42000   -1.50000
AFIX   0
PART   0
O17   4    0.342271    0.834392    0.302658    11.00000    0.05033    0.02310 =
         0.02504   -0.00319    0.00879   -0.01012
O18   4    0.339084    0.729761    0.359263    11.00000    0.04962    0.01999 =
         0.02456   -0.00046    0.00197   -0.00858
C36   1    0.354864    0.800633    0.349369    11.00000    0.03458    0.02314 =
         0.02717   -0.00543    0.00804   -0.00598
C37   1    0.395512    0.852500    0.396606    11.00000    0.05876    0.03788 =
         0.02743   -0.01107    0.00853   -0.01688
C38   1    0.391334    0.818120    0.451232    11.00000    0.17216    0.08167 =
         0.03178   -0.01105    0.01008   -0.06752
AFIX  33
H38A  2    0.419252    0.851850    0.480155    11.00000   -1.50000
H38B  2    0.410427    0.762754    0.453987    11.00000   -1.50000
H38C  2    0.341566    0.817059    0.455616    11.00000   -1.50000
AFIX   0
C39   1    0.368462    0.940100    0.390132    11.00000    0.18478    0.04123 =
         0.07509   -0.03550   -0.00358    0.00072
AFIX  33
H39A  2    0.372653    0.960499    0.353769    11.00000   -1.50000
H39B  2    0.396951    0.974105    0.418595    11.00000   -1.50000
H39C  2    0.318468    0.941768    0.393889    11.00000   -1.50000
AFIX   0
C40   1    0.472051    0.855062    0.388719    11.00000    0.06510    0.16428 =
         0.08046   -0.04561    0.01101   -0.05710
AFIX  33
H40A  2    0.473586    0.876063    0.351989    11.00000   -1.50000
H40B  2    0.492153    0.800177    0.392528    11.00000   -1.50000
H40C  2    0.499883    0.890603    0.416542    11.00000   -1.50000
AFIX   0
O19   4    0.131623    0.442147    0.204233    11.00000    0.01905    0.02276 =
         0.03690    0.00482    0.00063   -0.00089
O20   4    0.098239    0.566984    0.176385    11.00000    0.03057    0.02463 =
         0.05159    0.00663    0.00209   -0.00060
C41   1    0.085783    0.493496    0.181647    11.00000    0.01993    0.02979 =
         0.02679    0.00472    0.00131   -0.00399
C42   1    0.010948    0.460541    0.159491    11.00000    0.02194    0.04002 =
         0.04095    0.00308   -0.00137   -0.00367
C43   1    0.016077    0.396882    0.116254    11.00000    0.04540    0.07317 =
         0.09801   -0.04112   -0.00607   -0.00558
AFIX  33
H43A  2    0.049939    0.354699    0.132204    11.00000   -1.50000
H43B  2    0.032460    0.422371    0.085219    11.00000   -1.50000
H43C  2   -0.030852    0.372437    0.103397    11.00000   -1.50000
AFIX   0
C44   1   -0.039879    0.527002    0.136280    11.00000    0.03494    0.06314 =
         0.08345    0.00083   -0.02150    0.01238
AFIX  33
H44A  2   -0.087239    0.503848    0.123044    11.00000   -1.50000
H44B  2   -0.023112    0.553292    0.105687    11.00000   -1.50000
H44C  2   -0.042416    0.567189    0.164979    11.00000   -1.50000
AFIX   0
C45   1   -0.014897    0.419904    0.206713    11.00000    0.04038    0.13080 =
         0.08700    0.04657    0.00791   -0.02883
AFIX  33
H45A  2    0.018087    0.376350    0.221664    11.00000   -1.50000
H45B  2   -0.062385    0.397046    0.193532    11.00000   -1.50000
H45C  2   -0.017134    0.459989    0.235533    11.00000   -1.50000
AFIX   0
O21   4    0.149051    0.618907    0.317415    11.00000    0.02500    0.02689 =
         0.03638    0.00681    0.01363    0.00388
O22   4    0.119252    0.497227    0.343564    11.00000    0.03303    0.02551 =
         0.05805    0.01128    0.01914    0.00318
C46   1    0.107321    0.571043    0.335356    11.00000    0.02144    0.03207 =
         0.03156    0.00308    0.00744    0.00290
C47   1    0.038575    0.609234    0.346938    11.00000    0.03015    0.04248 =
         0.06127    0.00322    0.02124    0.00766
C48   1   -0.001825    0.645533    0.294206    11.00000    0.04736    0.11459 =
         0.08967    0.01498   -0.00151    0.03846
AFIX  33
H48A  2    0.028752    0.684274    0.279724    11.00000   -1.50000
H48B  2   -0.044191    0.673644    0.301399    11.00000   -1.50000
H48C  2   -0.016289    0.602270    0.267226    11.00000   -1.50000
AFIX   0
C49   1   -0.006304    0.547702    0.370430    11.00000    0.05020    0.06514 =
         0.16888    0.01745    0.07095    0.00893
AFIX  33
H49A  2   -0.048721    0.574491    0.378669    11.00000   -1.50000
H49B  2    0.021589    0.524545    0.404243    11.00000   -1.50000
H49C  2   -0.020788    0.504300    0.343561    11.00000   -1.50000
AFIX   0
C50   1    0.059183    0.677702    0.387678    11.00000    0.07296    0.06408 =
         0.08704   -0.01065    0.04910    0.01530
AFIX  33
H50A  2    0.087346    0.717964    0.372106    11.00000   -1.50000
H50B  2    0.087457    0.655980    0.421818    11.00000   -1.50000
H50C  2    0.016079    0.703464    0.395469    11.00000   -1.50000
AFIX   0
N11   3    0.386294    0.197145    0.346364    11.00000    0.03545    0.02837 =
         0.04086    0.00918    0.01088    0.01058
N12   3    0.402066    0.178583    0.393269    11.00000    0.02823    0.04000 =
         0.05495    0.01248    0.00450    0.00373
N13   3    0.419695    0.159435    0.438247    11.00000    0.06410    0.12062 =
         0.05233    0.03556   -0.00620    0.01169
N21   3    0.349907    0.864709    0.194885    11.00000    0.04845    0.02952 =
         0.03176    0.00240    0.01501   -0.01111
N22   3    0.388351    0.916763    0.217011    11.00000    0.03335    0.02910 =
         0.04338    0.00123    0.01553   -0.00316
N23   3    0.426086    0.967323    0.235704    11.00000    0.05629    0.05145 =
         0.08239   -0.01226    0.01872   -0.02856
PART   1
O61A  4    0.042418    0.359309    0.344188    10.58000    0.03406    0.02442 =
         0.03922    0.00885    0.00642   -0.00626
AFIX  83
H61A  2    0.064370    0.403726    0.346888    10.58000   -1.20000
AFIX  66
C61A  1    0.044004    0.327912    0.395705    10.58000    0.03284    0.03909 =
         0.04699    0.01592    0.02153    0.00845
C62A  1    0.011294    0.253771    0.400932    10.58000    0.04796    0.03755 =
         0.07302    0.02085    0.02598    0.00610
AFIX  43
H62A  2   -0.012907    0.226124    0.369131    10.58000   -1.20000
AFIX  65
C63A  1    0.013993    0.220082    0.452689    10.58000    0.07683    0.04060 =
         0.08361    0.02654    0.04892    0.01067
AFIX  43
H63A  2   -0.008363    0.169410    0.456261    10.58000   -1.20000
AFIX  65
C64A  1    0.049402    0.260533    0.499219    10.58000    0.13838    0.06532 =
         0.06501    0.02018    0.05070    0.01788
AFIX  43
H64A  2    0.051247    0.237507    0.534593    10.58000   -1.20000
AFIX  65
C65A  1    0.082112    0.334674    0.493993    10.58000    0.12906    0.06612 =
         0.04736    0.00579    0.02913    0.00909
AFIX  43
H65A  2    0.106313    0.362320    0.525794    10.58000   -1.20000
AFIX  65
C66A  1    0.079414    0.368364    0.442236    10.58000    0.06213    0.06285 =
         0.04584    0.01022    0.01921    0.00569
AFIX  43
H66A  2    0.101770    0.419036    0.438664    10.58000   -1.20000
AFIX   0
PART   2
O61B  4   -0.015009    0.204264    0.334437    10.42000    0.12877    0.09938 =
         0.07662   -0.01079    0.01816   -0.02031
AFIX  83
H61B  2   -0.034165    0.159504    0.338841    10.42000   -1.20000
AFIX  66
C61B  1    0.003294    0.242449    0.383633    10.42000    0.04233    0.05985 =
         0.04633   -0.00210    0.00849    0.01433
C62B  1   -0.012985    0.204962    0.429882    10.42000    0.05797    0.07241 =
         0.05109    0.00080    0.00448    0.02013
AFIX  43
H62B  2   -0.036657    0.154000    0.426539    10.42000   -1.20000
AFIX  65
C63B  1    0.005370    0.242040    0.481022    10.42000    0.13027    0.06528 =
         0.04228    0.00347    0.01051   -0.00700
AFIX  43
H63B  2   -0.005756    0.216419    0.512631    10.42000   -1.20000
AFIX  65
C64B  1    0.040006    0.316605    0.485913    10.42000    0.11686    0.09124 =
         0.07374   -0.00767   -0.00661   -0.01697
AFIX  43
H64B  2    0.052551    0.341946    0.520865    10.42000   -1.20000
AFIX  65
C65B  1    0.056286    0.354093    0.439665    10.42000    0.08001    0.05996 =
         0.10592   -0.00807    0.01864   -0.02065
AFIX  43
H65B  2    0.079958    0.405055    0.443009    10.42000   -1.20000
AFIX  65
C66B  1    0.037931    0.317016    0.388525    10.42000    0.02776    0.07246 =
         0.09255   -0.01294    0.00639    0.00915
AFIX  43
H66B  2    0.049058    0.342638    0.356916    10.42000   -1.20000
PART   0

AFIX   0
HKLF 4

REM  FKFe4Y2 in P2(1)/c
REM R1 =  0.0416 for   11528 Fo > 4sig(Fo)  and  0.0619 for all   15075 data
REM    917 parameters refined using     97 restraints

END

WGHT      0.0710      0.0000

REM Highest difference peak  0.708,  deepest hole -0.576,  1-sigma level  0.091
Q1    1   0.1902  0.6145  0.4904  11.00000  0.05    0.71
Q2    1   0.2131  0.5604 -0.0066  11.00000  0.05    0.66
Q3    1   0.1512  0.5658  0.0083  11.00000  0.05    0.59
Q4    1   0.1450  0.7577  0.2433  11.00000  0.05    0.59
Q5    1   0.1095  0.5500  0.0292  11.00000  0.05    0.54
Q6    1   0.2617  0.2291  0.0922  11.00000  0.05    0.53
Q7    1   0.3025  0.4548  0.0198  11.00000  0.05    0.51
Q8    1   0.3231  0.6313  0.5258  11.00000  0.05    0.46
Q9    1   0.3312  0.8941  0.4140  11.00000  0.05    0.46
Q10   1   0.3365  0.8786  0.4253  11.00000  0.05    0.46
Q11   1   0.1155  0.4626  0.0271  11.00000  0.05    0.44
Q12   1   0.4387  0.7808  0.4424  11.00000  0.05    0.42
Q13   1   0.3126  0.1085  0.1598  11.00000  0.05    0.42
Q14   1   0.2863  0.4991  0.5367  11.00000  0.05    0.41
Q15   1   0.3809  0.2366  0.1137  11.00000  0.05    0.41
Q16   1   0.3904  0.1999  0.1309  11.00000  0.05    0.41
Q17   1   0.3872  0.1429  0.1600  11.00000  0.05    0.40
Q18   1   0.2602  0.4964  0.0002  11.00000  0.05    0.39
Q19   1   0.3239  0.5048  0.2888  11.00000  0.05    0.37
Q20   1   0.2727  0.4934  0.3094  11.00000  0.05    0.37
;
_shelx_res_checksum   30934

_shelx_hkl_file
;
  -7  -2  29   31.71    4.38
  -8  -8  27   26.66    5.00
  -7  -7  26   32.22    4.65
  -7  -8  25   31.94    4.56
  -6  -6  25   12.17    4.49
  -7  -9  24   25.76    4.42
  -6  -7  24   17.36    4.62
  -8 -11  23    4.98    4.16
  -6  -8  23    6.35    3.77
  -4  -4  22    9.28    4.21
  -8 -12  21  -11.15    4.34
  -7 -11  21    6.99    4.62
  -3  -1  21  101.74    4.51
  -6 -10  20   -0.26    3.75
  -9 -14  19   -5.66    3.99
  -8 -13  19   45.36    4.51
  -7 -12  19   -0.45    4.53
  -5  -9  19  174.94    4.85
  -4  -7  19   67.60    4.55
  -6 -11  18    2.22    3.99
  -7  15  18   60.56    4.61
  -5 -10  17    3.42    4.03
  -2  -3  17    2.68    3.58
  -9 -15  16    0.68    4.15
  -8 -14  16   19.06    4.42
  -7 -13  16   39.02    3.85
  -6 -12  16    8.74    3.94
  -4  -9  16   -3.78    3.30
  -3  -7  16   -0.54    3.48
  -2  -4  16  124.75    4.55
 -10 -16  15   13.73    4.80
  -5 -11  15    6.30    4.04
  -2  -5  15   56.85    4.05
  -7  16  15    5.66    4.17
  -8  17  15    9.86    4.57
  -3  -8  14   48.64    3.76
  -4 -10  13   79.77    3.86
  -8 -15  12   -4.89    4.50
  -7 -14  12    2.16    3.79
  -6 -13  12   -0.47    4.07
  -4  13  12   30.14    4.15
  -9 -16  11   18.35    4.24
  -8 -15  11   95.82    4.83
  -5 -12  11   17.53    4.15
  -3  -9  11    7.35    3.58
  -2  -7  11   40.20    3.91
  -9 -16  10   67.52    4.58
  -5 -12  10   35.07    3.49
  -2  10  10   14.47    3.65
  -6  16  10   10.35    4.49
  -7  17  10    1.76    4.32
  -9 -16   9   -1.30    4.28
  -4 -11   9   36.43    3.60
  -1  -5   9   41.30    3.39
  -5  15   9   56.65    4.22
  -8  18   9   37.36    4.96
 -10 -17   8   11.33    4.15
  -4 -11   8   18.83    3.52
  -1   8   8 1144.63    9.80
  -5  15   8    1.04    3.98
  -8  18   8    2.99    4.09
 -10 -17   7   -0.34    4.10
  -2  -8   7   10.19    3.77
 -10 -17   6    9.34    4.12
  -2  -8   6  104.94    4.45
  -2  -8   5  396.30    5.89
  -8  18   5    0.06    4.13
  -9 -16   4    0.44    4.50
  -2  -8   4  294.51    5.45
  -8  18   4   -1.51    3.99
  -9 -16   3   45.37    4.74
  -4 -11   3   11.85    3.61
  -2  -8   3  219.76    5.01
  -5  15   3   90.47    4.35
  -7  17   3    7.59    4.38
  -8  18   3    0.84    3.99
  -9 -16   2   17.19    4.61
  -4 -11   2  226.71    4.68
  -5  15   2   -4.30    3.92
  -6  16   2  104.40    4.24
  -7  17   2   -7.54    4.47
 -11 -17   1    5.53    4.07
  -8 -15   1    4.89    3.81
  -5 -12   1  160.77    4.29
  -1   8   1   15.96    3.02
  -3  12   1  277.85    4.72
 -11 -17   0   -0.28    4.08
  -7 -14   0   10.44    4.07
  -6 -13   0   66.11    3.74
  -5 -12   0  124.49    4.17
  -1  -5   0  745.96    8.82
  -2  10   0   -1.27    3.52
  -3  -9  -1    7.47    3.70
 -12 -17  -2    7.12    4.72
 -10 -16  -2   33.01    4.59
  -9 -15  -3   54.59    4.01
  -1   6  -3   -1.03    2.91
  -2   9  -3  108.82    4.20
  -3  11  -3  249.79    4.64
  -6  15  -3   15.34    3.83
  -7  16  -3   23.93    3.70
 -11 -16  -4   -2.10    4.22
  -7 -13  -4  189.56    4.97
  -6 -12  -4    8.06    3.46
 -10 -15  -5    6.35    4.53
  -4  -9  -5    5.14    3.54
  -1   4  -5  159.83    4.69
  -2   8  -5   18.81    3.68
  -3  10  -5  177.89    4.31
  -9  17  -5   11.74    3.96
 -12 -16  -6    3.31    4.76
  -9 -14  -6   -0.05    3.77
  -5 -10  -6    3.18    3.51
  -2   7  -6   83.46    4.07
  -6  14  -6   11.14    3.95
  -7  15  -6   20.94    3.82
 -11 -15  -7   17.77    4.23
  -4  -8  -7   11.75    3.65
  -2   6  -7  129.67    3.93
 -10  17  -7   20.26    4.57
  -5  -9  -8   37.04    3.80
  -3   8  -8   41.81    3.80
  -4  10  -8    9.11    3.36
  -6  13  -8   18.25    3.89
  -7  14  -8    7.67    3.69
  -8  15  -8   81.49    4.71
  -3   7  -9    1.43    3.44
  -5  11  -9   26.70    3.34
 -10  16  -9   -7.02    4.77
  -6  -9 -10   29.06    3.69
  -7  13 -10   47.65    3.92
  -8  14 -10    5.76    4.35
 -11 -13 -11   10.03    4.54
  -6  11 -11  149.29    4.60
 -10  15 -11   91.79    4.52
  -6  10 -12    2.85    3.99
 -10 -11 -13   25.32    4.70
  -4   3 -13  216.40    5.21
  -5   7 -13   55.62    3.62
  -6   9 -13   52.20    4.20
 -11 -11 -14   38.94    4.61
  -5   5 -14   33.27    3.51
  -9  12 -14   47.82    4.54
 -10  13 -14    8.89    4.07
  -6   6 -15   61.69    3.69
  -9  11 -15   48.20    4.33
 -10  12 -15   92.42    4.52
  -6   3 -16  145.48    4.54
  -9  10 -16   10.44    4.37
 -10  11 -16   15.86    4.20
 -11  12 -16   20.00    4.75
  -7   4 -17    9.59    4.08
  -9   4 -19   12.18    3.87
 -11   8 -19   29.12    4.21
 -12   9 -19   -4.09    4.54
  -8  -5  29   -4.30    6.73
  -7  -4  28   57.55    6.34
  -9 -12  23   -1.84    6.73
  -4  -2  23    1.61    5.79
  -7  13  22    3.91    6.88
  -9 -13  21   46.97    6.88
  -4  -5  21  205.91    6.78
  -4  -6  20    8.51    5.97
  -3  -3  20  100.04    5.56
  -2  -1  18    0.95    5.02
  -3  -6  17  166.71    5.75
  -3   9  17  190.15    7.29
  -6 -12  15  168.74    6.04
  -6  15  15    6.75    6.27
  -5 -11  14   45.63    5.91
  -5  14  14   24.32    5.63
  -2  -6  13   83.55    5.48
  -2   9  13   20.15    5.08
  -7 -14  11   37.66    5.55
  -6 -13  11   25.19    5.66
  -1  -4  11   93.66    5.93
  -1   7  11   40.92    5.59
  -6  16  11    6.23    6.36
  -7  17  11   31.30    6.07
  -8  18  11   31.30    6.87
  -8 -15  10    0.99    5.26
  -3  -9  10   -0.77    5.03
  -3  12  10  189.57    5.67
  -5  15  10    3.66    5.49
  -8  18  10   -9.74    6.81
   0   1   9  111.42    7.94
  -9 -16   8   11.10    6.04
  -9 -16   7    0.17    6.23
  -4 -11   7  304.62    6.02
  -4  14   7    1.17    5.73
  -9 -16   6    8.62    6.20
  -4 -11   6   -5.79    4.97
  -4  14   6  155.87    6.27
  -9 -16   5   47.56    6.36
  -4 -11   5  230.70    5.83
  -4  14   5   -4.97    5.89
  -4 -11   4   -4.71    5.01
  -4  14   4  240.04    6.46
  -4  14   3    5.81    5.76
  -8 -15   2   36.91    5.55
  -8  18   2   63.99    5.80
  -7 -14   1   30.22    5.92
  -6 -13   1    0.77    4.68
  -5  15   1  174.51    5.98
  -6  16   1   -5.27    5.26
  -7  17   1    3.88    6.15
   0   3   0   -0.87    4.60
  -3  12   0  143.36    5.41
 -10 -16  -1   -1.74    6.16
  -2  -7  -1   24.83    4.37
  -2  10  -1  435.14    6.61
  -4 -10  -2  147.10    5.72
  -1  -4  -2    1.20    4.42
  -1   7  -2  186.02    5.23
  -4  13  -2   57.82    4.80
  -9  18  -2    9.92    6.64
  -8 -14  -3   79.71    5.93
  -5 -11  -3   17.78    4.99
  -5  14  -3  183.89    6.12
  -8  17  -3   31.00    5.89
  -4  12  -5   -4.70    4.65
  -8 -13  -6   96.97    6.06
  -8  16  -6    7.08    6.04
  -3  -6  -7  223.60    7.04
  -3   9  -7 1230.38    8.65
  -4  11  -7    3.89    4.74
 -12 -15  -8    6.00    6.40
  -9 -13  -8   -2.14    5.39
  -2   5  -8  259.17    5.64
  -9  16  -8  204.16    6.40
 -11 -14  -9    6.93    6.08
  -2   1  -9  390.78    8.22
  -2   2  -9  267.92    6.62
  -9 -12 -10    1.46    5.44
  -3   6 -10   64.20    5.25
  -9  15 -10   11.10    5.81
  -3   4 -11    6.89    4.94
 -12 -13 -12    8.44    5.69
  -4   6 -12   23.31    4.87
  -9 -10 -13  150.19    6.45
  -8  -9 -13    2.15    5.70
  -8  12 -13   21.31    5.22
  -9  13 -13    1.69    6.03
  -6   8 -14    4.67    5.11
  -8  11 -14   16.62    5.31
  -8  -7 -15   25.09    5.90
  -8  10 -15    0.00    5.21
 -11  13 -15   29.91    6.42
 -12 -10 -16    8.55    5.81
  -7   7 -16    6.63    5.55
 -12  -9 -17   27.62    6.11
  -8   7 -17   18.12    5.50
 -10  10 -17   25.39    5.98
 -11  11 -17    8.94    6.62
  -9   7 -18   16.05    5.19
 -10   3 -20   -4.40    6.16
 -11   6 -20    1.88    5.74
 -12   5 -21    5.33    6.56
  -7  -1  29    8.92    4.34
  -8  -6  28   -1.39    4.86
  -6  -2  27   12.45    4.59
  -6  -4  26   17.22    4.66
  -8  -9  25  133.05    4.97
  -5  -2  25   39.56    4.32
  -8 -10  24    0.01    4.17
  -5  -4  24    6.26    4.07
  -7  -9  23   11.50    4.53
  -7 -10  22   27.35    4.55
  -6  -9  21    2.36    3.84
  -7 -11  20    5.19    4.56
  -5  -8  20   26.20    4.15
  -6 -10  19    0.10    3.88
  -3  -4  19    3.25    3.51
 -10 -15  18   11.48    4.78
  -9 -14  18    1.25    4.13
  -8 -13  18    3.46    4.47
  -7 -12  18   13.45    3.87
  -3  -5  18   22.65    3.69
  -6  14  18   55.83    4.76
  -6 -11  17    4.92    3.97
  -4  -8  17    2.19    3.44
  -5  13  17   29.94    4.08
  -5 -10  16   12.03    4.05
  -7  16  16   17.89    4.29
  -8 -14  15    1.58    4.49
  -7 -13  15   20.95    3.92
  -4  -9  15   50.07    3.64
  -3  -7  15  430.00    5.65
 -10 -16  14   48.13    5.01
  -9 -15  14    2.84    4.33
  -6 -12  14    9.39    4.04
  -1  -1  14   98.26    5.00
 -10 -16  13   -0.73    4.14
  -5 -11  13   -2.18    4.16
  -3  -8  13   22.13    3.70
  -4  13  13    6.48    3.99
  -4 -10  12    1.67    3.40
  -1  -3  12  332.87    6.25
  -6  16  12   -3.40    4.52
  -7  17  12    5.52    4.21
 -11 -17  11   34.39    4.78
  -2  10  11  123.74    4.44
  -3  12  11   12.89    3.39
  -5  15  11    1.45    3.87
 -11 -17  10   12.04    4.68
  -7 -14  10   27.77    3.96
  -6 -13  10    0.15    4.03
  -2  -7  10    4.44    3.62
  -8 -15   9   38.92    3.93
  -7 -14   9   13.69    4.01
  -6 -13   9   20.03    3.99
  -5 -12   9   77.17    3.67
  -3  -9   9   34.62    3.75
  -1   8   9   50.42    4.18
  -4  14   9   32.66    4.33
  -8 -15   8    7.55    3.75
  -7 -14   8  130.66    4.42
  -5 -12   8   -4.03    3.33
  -1  -5   8  193.90    4.73
  -4  14   8   23.51    4.13
  -8 -15   7   -5.70    3.78
  -5 -12   7   17.28    3.43
   0  -1   7  122.69    5.65
  -8 -15   6   73.00    4.04
  -5 -12   6   14.60    3.40
  -2  11   6   90.24    4.14
  -8 -15   5    4.86    3.85
  -5 -12   5    4.98    3.36
  -2  11   5  739.65    6.84
 -11 -17   4    4.68    4.06
  -8 -15   4  129.69    4.45
  -5 -12   4   10.02    3.41
   0   5   4  100.91    4.61
  -2  11   4   17.93    3.62
 -11 -17   3   -3.50    4.15
  -8 -15   3    2.28    3.82
  -7 -14   3   98.49    4.55
  -6 -13   3   95.41    3.89
  -5 -12   3   47.50    3.67
  -2  11   3  360.14    5.30
 -11 -17   2   -3.74    4.06
  -7 -14   2  130.98    4.56
  -6 -13   2   12.23    3.39
  -5 -12   2   42.35    3.66
  -4  14   2   69.15    4.34
  -3  -9   1   67.11    4.12
  -1  -5   1  945.64    9.57
   0   4   1  133.35    5.04
  -4  14   1    9.62    4.05
  -8  18   1   -5.66    4.04
 -10 -16   0  138.19    5.04
  -3  -9   0  166.86    4.69
  -1   8   0    4.19    2.90
  -5  15   0    5.56    3.89
  -6  16   0   93.93    4.06
  -7  17   0   -4.65    4.32
  -8  18   0   21.02    4.23
 -12 -17  -1   -1.94    4.76
  -3  12  -1   42.37    3.61
  -9 -15  -2   20.96    3.92
 -11 -16  -3   10.91    4.31
  -7 -13  -3    2.00    4.18
  -6 -12  -3    7.55    3.37
  -3  -8  -3  242.75    5.38
  -4  13  -3   13.17    3.33
  -9  18  -3   71.31    4.85
 -10 -15  -4   -0.57    4.44
  -1   6  -4   28.04    3.14
  -2   9  -4   50.20    3.70
  -3  11  -4  128.00    4.03
  -5  14  -4   -2.59    3.98
  -6  15  -4    1.66    3.76
  -7  16  -4    1.59    4.37
  -8  17  -4    3.35    4.25
 -12 -16  -5    2.56    4.88
  -9 -14  -5   12.95    3.88
  -2  -5  -5  211.77    5.77
 -11 -15  -6   50.92    4.59
  -7 -12  -6   48.68    4.36
  -6 -11  -6   -0.24    3.43
  -1   2  -6  276.19    6.72
  -3  10  -6    8.57    3.44
  -5  13  -6  129.00    4.47
  -9  17  -6   15.37    3.94
 -10 -14  -7   20.31    4.57
  -6  14  -7  116.90    4.26
  -7  15  -7   16.89    3.65
  -8 -12  -8   30.59    4.11
  -6 -10  -8   -2.87    3.43
  -5  12  -8    1.08    4.06
 -10  17  -8   15.06    4.60
  -2   3  -9  251.00    5.42
  -7  14  -9   24.34    3.85
  -8  15  -9   65.72    4.61
 -12 -14 -10   22.49    4.32
  -8 -11 -10  191.24    5.27
  -7 -10 -10   64.88    3.90
  -4   9 -10   28.13    3.49
  -6  12 -10   -1.18    3.91
 -10  16 -10    4.02    4.56
  -4   8 -11  245.92    4.60
  -5  10 -11  129.62    3.85
  -5   9 -12   16.51    3.35
  -7  12 -12   14.88    3.79
  -8  13 -12    0.16    4.35
  -9  14 -12    0.98    4.16
  -4   4 -13   89.52    4.15
  -7  11 -13   58.64    4.18
 -10  14 -13    3.24    4.00
 -10 -10 -14   13.17    3.85
  -5   6 -14    8.67    3.34
  -7  10 -14    1.80    3.77
 -11 -10 -15    2.42    4.20
  -7   9 -15    4.54    3.85
  -6   4 -16    7.95    3.29
  -8   9 -16    2.79    3.77
  -7   5 -17    1.60    3.99
  -9   9 -17    6.11    4.36
  -8   5 -18    4.09    3.90
 -10   9 -18   24.24    4.20
 -11  10 -18   21.47    4.80
  -9   5 -19    0.43    3.72
 -10   7 -19   26.05    4.26
 -10   4 -20   26.99    4.41
  -4  10  19    2.18    6.89
  -2   7  16   18.00    6.29
  -3  -1 -11  792.71   15.12
  -8  -8 -14   54.08    7.37
  -6  -5 -14    5.94    5.94
 -11  -8 -17    1.20    7.43
 -10  -7 -17  156.56    8.50
  -7   0  29   -4.81    6.00
  -8  -7  27   50.15    6.08
  -7  -5  27   21.85    6.08
  -8  -8  26    6.00    6.01
  -6  -5  25    2.42    5.94
  -7  11  25   13.76    7.01
  -9 -11  24   -4.99    6.84
  -6  10  24    3.67    6.14
  -5  -5  23   45.12    5.84
  -4  -1  23  293.58    7.80
  -6  11  23    5.74    6.15
  -8 -11  22   87.31    6.41
  -6  -8  22   21.97    5.55
  -5  -6  22   54.02    5.94
  -5  -7  21   59.32    5.88
  -3   0  21   -3.11    4.90
  -7  14  21   31.66    7.14
 -10 -14  20   19.60    6.77
  -9 -13  20   52.47    6.07
  -8 -12  20   19.44    6.32
  -6  13  20  106.27    6.85
  -5  12  19   29.92    6.56
  -7  15  19    8.50    6.90
  -5  -9  18   12.18    5.73
  -2   0  18   -1.16    5.10
 -10 -15  17   28.77    7.00
  -2  -2  17   71.69    5.61
  -3  10  16   13.06    5.96
  -4  12  16    7.74    5.79
  -6  15  16   64.38    6.39
  -2   8  15    7.92    5.03
  -5  14  15  159.17    6.18
  -8 -14  14   45.09    6.37
  -7 -13  14   21.16    5.49
  -2  -5  14  289.05    6.57
  -3  11  14    4.92    5.99
  -1  -2  13   26.99    5.47
  -7  17  13   36.98    6.03
 -10 -16  12  121.44    6.31
  -2  -6  12   18.65    5.23
  -4 -10  11  149.28    5.49
  -1  -4  10   45.52    4.54
  -4  14  10  141.06    6.27
 -11 -17   9   -8.85    6.70
  -2  -7   9   49.64    5.35
 -11 -17   8    0.83    6.68
  -6 -13   8   36.03    5.83
  -3  -9   8   94.90    5.46
   0   0   8   92.80    6.48
 -11 -17   7   23.57    6.17
  -7 -14   7   -1.04    5.49
  -6 -13   7  253.48    6.53
  -1  -5   7    5.99    4.22
  -2  11   7  295.04    6.28
 -11 -17   6    3.90    5.66
  -7 -14   6  151.59    6.02
  -6 -13   6   44.67    5.86
 -11 -17   5    6.77    5.75
  -7 -14   5   76.68    5.84
  -6 -13   5   60.11    6.07
   0   5   5   11.94    4.48
  -3  13   5  181.34    5.45
  -7 -14   4  191.81    6.27
  -6 -13   4   27.25    4.80
  -3  13   4   -4.78    4.75
   0   5   3   19.48    4.55
  -1  -5   2  560.14    8.23
  -2  11   2  146.70    5.54
 -10 -16   1    2.55    6.22
 -12 -17   0   13.13    6.68
  -2  -7   0   12.94    4.35
  -9 -15  -1  188.02    6.01
  -4 -10  -1  281.33    6.27
  -1   8  -1   57.27    4.87
  -5  15  -1   81.22    5.69
  -6  16  -1   48.24    5.46
  -7  17  -1   11.05    5.99
  -8 -14  -2   45.34    5.73
  -5 -11  -2  136.71    5.57
  -2  10  -2  154.69    5.59
  -3  12  -2  153.18    5.29
  -2  -6  -3  136.22    5.38
  -3  -7  -5   80.20    5.78
  -1   5  -5   -3.18    4.11
  -1   1  -6   11.49    4.53
  -1   3  -6  281.75    6.74
  -2   7  -7   66.18    5.27
  -8  16  -7   -1.18    5.78
  -7 -11  -8   -0.31    5.92
  -4  -7  -8   10.67    5.14
 -10 -13  -9   26.82    6.01
  -5  -8  -9    5.07    4.97
  -2   0  -9   -0.26    4.11
  -4  10  -9  177.79    5.39
  -6  13  -9    5.46    5.40
  -9  16  -9   10.74    5.73
  -5  11 -10   35.03    4.60
 -10 -12 -11   21.44    5.33
  -6  -8 -11  200.02    6.34
  -8  14 -11    8.75    6.06
 -10  15 -12   82.06    6.89
  -4  -1 -13  319.69    9.15
  -5   8 -13   21.46    4.65
 -13 -12 -14    0.07    6.67
  -9  -9 -14   15.66    5.54
 -10  -9 -15   16.05    5.37
  -5   1 -15   25.90    5.06
  -5   2 -15   37.29    5.09
  -5   3 -15    8.41    4.78
  -6   7 -15    0.25    5.12
 -11  -9 -16    6.65    6.16
  -6  -1 -16   18.69    5.02
  -6   5 -16   47.85    4.82
 -11   9 -19    3.24    6.03
 -10  -1 -20   41.72    6.58
 -10   5 -20   -0.07    5.95
 -11   7 -20   11.64    5.62
 -11   1 -21   18.74    6.04
 -11   2 -21    9.73    5.94
 -11   3 -21    2.81    5.73
 -12   6 -21    8.70    6.39
  -8  -2  30    1.44    4.76
  -8  -4  29    6.27    4.90
  -7  -3  28   12.51    4.30
  -6  -1  27    4.56    4.59
  -7  -6  26   48.89    4.71
  -9 -10  25    9.46    4.89
  -7  -7  25    0.15    4.49
  -7  -8  24   38.61    4.77
  -6  -6  24    3.52    3.89
  -6  -7  23   15.80    3.95
  -9 -12  22   24.13    4.24
  -4  -3  22    2.72    4.14
  -7 -10  21  132.91    5.07
  -3  -2  20   33.34    3.81
  -7 -11  19    8.69    3.81
  -4  -7  18    5.07    3.40
  -9 -14  17   14.00    4.24
  -8 -13  17    5.03    4.57
  -7 -12  17    1.92    3.88
  -7  16  17    3.97    4.84
 -10 -15  16   -5.39    4.21
  -6 -11  16    5.44    4.00
  -4  -8  16  234.58    4.63
  -3  -6  16   24.60    3.70
  -5 -10  15   14.06    4.25
  -2  -4  15  194.52    5.10
  -4  -9  14   14.39    3.47
  -4  13  14   71.61    4.44
  -9 -15  13   29.07    4.43
  -8 -14  13    6.34    3.81
  -7 -13  13    6.90    3.84
  -6 -12  13   79.69    4.34
  -6  16  13   15.44    4.36
  -9 -15  12   14.83    4.33
  -5 -11  12   18.05    3.42
  -3  -8  12   12.03    3.60
  -3  12  12  167.79    5.17
  -5  15  12   19.95    3.90
 -10 -16  11   -3.69    4.34
  -4  14  11   87.51    4.46
 -10 -16  10   82.88    4.69
  -4 -10  10   13.41    3.50
  -2  -7   8   -1.25    3.71
  -2  11   8  104.35    4.16
  -3  13   8   51.09    3.65
  -3  -9   7   -0.80    3.66
  -3  13   7   37.23    3.59
  -6  17   7   55.89    4.58
  -7  18   7   78.81    4.49
  -3  -9   6   54.38    3.98
  -1  -5   6   48.02    3.58
   0  -1   6   43.31    4.35
   0   5   6    1.96    2.98
  -1   9   6  119.60    4.50
  -3  13   6    0.97    3.40
  -6  17   6  139.56    5.06
  -7  18   6   12.78    4.10
  -3  -9   5   14.96    3.71
  -1  -5   5   14.74    3.26
  -1   9   5  206.63    4.94
  -6  17   5   16.08    4.49
  -7  18   5   59.54    4.48
  -3  -9   4   30.99    3.72
  -1  -5   4   38.54    3.58
  -1   9   4   15.36    3.66
  -6  17   4   63.11    4.60
 -10 -16   3    5.05    4.31
  -3  -9   3   54.28    3.97
  -1  -5   3  171.15    4.93
  -1   9   3   44.66    3.87
  -3  13   3   92.00    3.85
 -10 -16   2  161.57    5.08
  -3  -9   2   92.40    4.20
   0   5   2   29.13    3.48
  -1   9   2  106.17    4.25
  -3  13   2    0.21    3.31
 -12 -17   1    5.06    4.80
  -2  -7   1    2.50    2.96
  -2  11   1    3.91    3.48
  -9 -15   0   -2.51    3.85
   0   4   0   20.64    3.51
  -2  11   0   91.26    4.00
  -4  14   0   27.73    4.09
  -8 -14  -1   60.69    4.35
   0   2  -1    8.14    3.58
  -4  14  -1    0.98    4.03
  -8  18  -1    4.09    4.07
 -11 -16  -2   14.28    4.37
  -7 -13  -2   19.14    4.20
  -6 -12  -2   16.12    3.53
  -5  15  -2   14.12    3.88
  -6  16  -2   56.74    4.02
  -7  17  -2   47.29    4.40
  -8  18  -2   -2.13    3.98
 -10 -15  -3    5.43    4.47
  -1   7  -3  172.34    4.29
  -2  10  -3  108.14    4.02
 -12 -16  -4    1.41    4.11
  -4  -9  -4    4.28    3.65
  -4  13  -4  187.61    4.07
  -9  18  -4    4.03    4.63
  -8 -13  -5   41.25    4.37
  -5 -10  -5   51.91    3.82
  -2   9  -5  260.19    4.81
  -3  11  -5  201.89    4.36
  -5  14  -5   18.08    4.04
  -6  15  -5   11.82    3.84
  -7  16  -5   -1.10    4.28
  -8  17  -5    7.80    4.03
  -2   8  -6  709.47    6.70
  -4  12  -6   21.97    3.32
 -12 -15  -7  127.41    4.86
  -9 -13  -7    5.30    3.92
  -5  -9  -7  260.81    5.37
  -5  13  -7   28.07    4.06
  -9  17  -7   -1.52    3.94
 -11 -14  -8    3.47    4.32
  -3  -5  -8  344.32    7.78
  -2   6  -8   48.23    3.91
  -3   9  -8   64.06    3.81
  -4  11  -8   39.64    3.51
  -7  15  -8    5.52    3.61
  -8  16  -8   33.93    4.28
  -2   4  -9   99.10    3.89
  -3   8  -9  183.53    4.43
  -5  12  -9  122.90    4.51
  -3   7 -10  277.48    4.93
  -3   5 -11   29.53    3.78
  -6  12 -11    4.83    3.76
  -7  13 -11   48.14    3.90
  -9  15 -11    8.03    4.05
 -10  16 -11    1.26    4.54
 -11 -12 -12   -4.99    4.39
  -4   7 -12   13.10    3.48
  -6  11 -12  275.36    4.95
 -12 -12 -13   61.27    4.59
  -4   5 -13    7.99    3.48
  -6  10 -13    0.47    3.92
  -6   9 -14    9.32    3.90
  -8  12 -14   68.78    4.65
  -9  13 -14  135.18    4.78
 -10  14 -14   -6.37    4.67
  -5   4 -15    3.58    3.33
  -8  11 -15   42.71    3.76
  -9  12 -15    7.40    4.24
 -10  13 -15    3.96    3.90
  -7   8 -16   46.36    4.08
  -9  11 -16   13.78    4.28
 -10  12 -16    6.12    4.11
  -7   6 -17   56.99    4.27
  -8   8 -17   14.49    3.74
 -10  11 -17   -0.91    4.03
 -11  12 -17    2.97    4.41
  -8   6 -18   81.89    4.34
  -9   8 -18  128.41    4.87
  -9   6 -19   16.58    3.70
 -10   8 -19    4.49    4.10
 -11   4 -21    7.86    4.19
  -7   4  29    1.63    8.58
  -7  10  26    4.72    8.37
  -3   3  21    0.64    7.44
  -9  -8 -15    4.04    6.89
 -10  -8 -16   44.87    6.91
  -9  -7 -16    0.83    6.75
  -8  -2 -18   14.55    7.01
  -7   1  29   10.46    6.07
  -9  -9  26   19.58    7.08
  -6  -3  26   83.21    6.97
  -5  -1  25   36.18    5.91
  -5  -3  24   38.54    5.95
  -7  12  24   24.80    7.03
  -8 -10  23   15.89    6.02
  -5  10  22    0.95    6.47
  -6  12  22   22.14    6.27
  -8 -11  21   40.40    6.29
  -4  -4  21    3.97    5.97
  -3   1  21  101.73    6.09
  -3   2  21   44.70    5.49
  -6  -9  20   44.18    5.69
  -4  -5  20   11.25    6.04
 -10 -14  19   31.52    7.04
  -9 -13  19   93.27    6.31
  -8 -12  19  133.78    6.70
  -5  -8  19    5.30    5.84
  -4  -6  19    2.19    4.71
  -3  -3  19    4.15    4.93
  -6 -10  18   16.85    5.72
  -4  11  18   22.82    5.85
  -5  -9  17   85.82    6.16
  -3  -5  17  166.17    5.85
  -9 -14  16   12.57    5.94
  -7 -12  16    0.95    5.50
  -2  -3  16    6.44    5.23
 -11 -16  14  162.45    7.09
  -3  -7  14   37.10    5.17
  -1   0  14 1149.52   13.37
  -2   9  14    2.92    4.90
  -7  17  14    9.33    6.85
  -1   6  13  447.98    9.74
  -5  15  13   34.10    6.09
  -8 -14  12   26.45    5.35
  -6 -12  12   59.17    5.91
  -2  10  12   89.94    5.45
  -9 -15  11  127.14    6.62
  -5 -11  11    1.62    4.79
  -3  -8  11   -1.50    5.12
  -2  -6  11   57.64    5.44
  -1   8  10  205.88    6.63
 -10 -16   9    7.55    5.90
  -2  11   9    7.47    4.86
 -10 -16   8   -5.02    5.98
   0   4   8  484.08   11.14
  -6  17   8   58.89    6.41
  -7  18   8   11.81    5.87
 -10 -16   7   19.02    6.08
  -2  -7   7   -1.14    5.27
  -1   9   7  508.39    7.66
  -5  16   7    1.54    5.37
  -5  16   6   94.39    5.67
 -10 -16   5   31.38    6.30
  -5  16   5   27.94    5.51
 -10 -16   4  141.19    6.79
  -5  16   4   73.66    5.58
  -7  18   4   25.13    5.91
  -6  17   3   51.16    6.42
  -7  18   3    4.37    5.93
 -12 -17   2   -7.75    6.73
  -2  -7   2  166.84    5.28
   0  -1   2  462.60   13.41
  -9 -15   1  191.06    6.10
   0   5   1   19.85    4.50
  -1   9   1   39.37    5.20
  -3  13   1   20.63    4.69
  -4 -10   0    1.00    5.08
 -11 -16  -1   45.37    6.15
  -7 -13  -1   18.07    5.87
  -5 -11  -1   17.78    5.00
  -1  -4  -1   18.29    4.64
   0   3  -1   36.13    5.12
  -3  -8  -2  442.48    7.26
  -1   8  -2   20.07    5.19
  -1  -3  -3  188.80    7.57
  -3  12  -3    9.43    4.66
  -6  16  -3   65.88    5.36
  -7  17  -3   31.87    6.13
  -9 -14  -4   -5.18    5.49
 -11 -15  -5   11.41    6.16
  -7 -12  -5   28.19    5.98
  -6 -11  -5    4.32    4.89
  -9  18  -5   53.05    6.62
 -10 -14  -6   -3.19    5.96
  -4  -8  -6  406.69    7.29
  -2  -4  -6  514.84   10.23
  -1   4  -6    2.26    4.17
  -6  15  -6   52.30    5.41
  -7  16  -6   -0.46    6.07
  -3  10  -7   20.28    4.86
 -13 -15  -8   -2.01    6.71
  -6  14  -8    9.12    5.38
 -12 -14  -9   -3.57    5.86
  -9 -12  -9   55.37    5.78
 -11 -13 -10    5.09    6.11
  -7  14 -10   -0.01    5.19
  -8  15 -10    5.26    6.03
 -12 -13 -11   21.94    5.96
  -9 -11 -11   71.15    5.88
  -8 -10 -11   10.16    5.73
  -7  -9 -11   29.52    4.92
 -13 -13 -12   29.09    6.77
  -6  -7 -12  101.33    5.92
  -8  13 -13  -12.81    6.16
  -9  14 -13   -3.06    5.84
  -5   7 -14   50.32    4.88
 -13 -11 -15    0.04    6.71
  -5   0 -15    0.50    4.86
  -8  10 -16  117.84    5.63
  -9  10 -17   50.50    6.23
 -10  10 -18   25.13    5.78
 -11  11 -18   29.32    6.31
  -9  -2 -19  117.95    6.99
 -10   6 -20   -1.80    5.86
 -11   0 -21   -2.98    6.00
 -11   5 -21    4.08    5.79
  -9  -7  28   64.48    5.01
  -8  -5  28    1.90    4.07
  -9  -8  27   19.02    4.78
  -7  -4  27    0.29    4.42
  -8  -9  24   17.46    4.33
 -10 -12  23    6.31    4.65
  -9 -11  23    0.33    4.22
  -7  -9  22    5.74    4.56
 -10 -13  21    3.62    4.74
  -9 -12  21    7.51    4.19
  -6  -8  21   -0.15    4.01
  -5  -7  20   -1.10    4.11
  -6  14  19   52.04    4.66
 -10 -14  18   20.18    4.09
  -7 -11  18   28.36    3.94
  -3  -4  18   15.19    3.64
  -5  13  18   61.29    4.96
  -4  -7  17   12.56    3.50
  -6  15  17    6.50    4.24
  -8 -13  16   18.37    4.54
  -5  14  16   11.00    4.70
 -10 -15  15  122.58    4.63
  -9 -14  15   14.54    4.30
  -6 -11  15   23.72    4.16
  -3  11  15    9.25    4.16
  -5 -10  14   10.84    3.43
  -6  16  14    8.34    4.41
 -11 -16  13    8.01    4.81
  -4  -9  13    7.25    3.43
  -2  -5  13  228.79    5.13
  -7 -13  12   11.59    4.06
  -1   7  12   18.03    3.82
  -4  14  12  103.64    4.63
  -8 -14  11   11.30    3.74
  -7 -13  11   -2.94    4.01
  -6 -12  11   19.21    4.09
  -1  -3  11    5.20    3.04
  -9 -15  10   18.98    4.53
  -5 -11  10    8.50    3.43
  -2  11  10   38.67    3.75
  -6  17  10   12.48    4.34
  -7  18  10   11.98    4.87
  -9 -15   9  101.29    4.78
  -4 -10   9    5.79    3.46
  -1  -4   9  332.87    5.82
  -3  13   9   -0.40    4.15
  -5  16   9    3.08    3.72
  -6  17   9   -6.56    4.30
  -7  18   9   16.72    4.16
  -4 -10   8    4.18    3.57
  -1   9   8    7.50    3.76
  -5  16   8    3.09    3.71
   0   5   7   70.59    4.32
 -10 -16   6   90.19    4.78
  -2  -7   6   33.97    3.99
  -4  15   6   31.83    4.08
  -2  -7   5   36.81    3.30
   0  -1   5   59.00    4.80
  -4  15   5    2.31    3.96
  -8  19   5   10.02    4.45
 -12 -17   4   -1.26    4.71
  -2  -7   4   42.74    3.31
  -4  15   4   26.22    3.94
  -8  19   4   56.01    4.73
 -12 -17   3    5.43    4.66
  -9 -15   3  139.29    4.41
  -2  -7   3    8.87    3.05
  -4  15   3    9.74    3.92
  -5  16   3    1.80    3.78
  -8  19   3   -3.40    4.57
  -9 -15   2   36.75    4.15
  -4 -10   2  461.60    5.78
  -5  16   2    4.17    3.79
  -6  17   2    6.80    4.29
  -7  18   2   60.80    4.39
  -8  19   2   15.94    4.72
  -4 -10   1  188.85    4.66
  -5  16   1    6.82    3.78
  -6  17   1  149.14    4.88
  -7  18   1   -4.98    4.09
 -11 -16   0   14.49    4.44
  -8 -14   0   61.81    4.26
  -5 -11   0   63.48    3.87
  -1   9   0   67.61    3.98
  -3  13   0    1.72    3.22
  -6 -12  -1    6.27    3.48
   0   4  -1  131.86    4.91
  -2  11  -1  205.95    4.51
  -3  13  -1    6.87    3.29
 -10 -15  -2    9.82    4.67
  -2  -6  -2  100.85    4.21
  -4  14  -2   26.85    4.03
 -12 -16  -3    4.48    4.14
  -5  15  -3   10.36    3.86
  -8  18  -3   45.84    4.12
  -8 -13  -4  156.85    4.82
  -5 -10  -4   23.43    3.72
  -1   7  -4   83.06    3.62
  -2  10  -4  148.06    4.24
  -3  12  -4   -3.90    3.39
  -6  16  -4   37.23    3.97
  -7  17  -4   95.39    4.58
  -1   6  -5   34.66    3.21
  -4  13  -5   15.00    3.32
  -3  11  -6   99.32    3.82
  -5  14  -6    3.78    3.90
  -8  17  -6   -2.21    4.04
  -9  18  -6   -0.33    4.56
  -8 -12  -7   88.84    4.58
  -6 -10  -7   41.79    3.81
  -2   8  -7    3.34    3.55
  -4  12  -7    3.42    3.20
  -5  13  -8    5.38    3.79
  -9  17  -8   20.91    4.68
  -6  -9  -9    9.53    3.48
  -2   5  -9    3.24    3.54
  -4  11  -9   33.14    3.41
  -7  15  -9   27.83    4.50
 -13 -14 -10    1.33    4.65
  -5  -7 -10  229.77    5.82
  -4  10 -10   10.22    3.37
  -6  13 -10   40.89    3.88
  -9  16 -10  213.41    4.84
  -3   6 -11  267.91    5.09
  -4   9 -11    9.52    3.40
  -5  11 -11    8.90    4.05
  -4   8 -12   27.40    3.46
  -5  10 -12   61.17    3.51
  -7  13 -12   60.38    3.91
  -8  14 -12    6.86    4.25
  -9  15 -12   15.37    3.98
  -4   6 -13  167.40    4.41
  -5   9 -13   14.17    3.26
  -7  12 -13    4.51    3.74
 -10  15 -13   28.47    4.50
  -7  11 -14   14.70    3.79
  -5   5 -15   52.45    3.74
  -6   8 -15    3.31    3.95
  -7  10 -15    8.68    3.77
  -6   6 -16   90.53    4.52
  -7   7 -17  498.28    6.03
  -8   9 -17   44.34    3.90
  -8   7 -18   27.33    3.87
  -9   9 -18    9.55    4.30
  -9   7 -19   42.82    4.60
 -11  10 -19   27.93    4.65
 -11   8 -20    3.19    4.64
  -4   7  22  185.11   11.56
  -6   5  27    7.58    8.93
  -2   6  17   11.36    7.27
  -7   2  29   41.95    7.60
  -7   3  29   57.47    7.91
  -6   9  25   78.18    8.48
  -2   1  18    0.12    6.18
  -3  -4  -9   94.76    7.85
  -6  -6 -13   97.13    7.04
  -7  -2 -17  172.15    9.21
  -8  -1  30    6.03    6.95
  -7  -2  28   32.74    6.42
  -8  -6  27   30.41    6.06
  -6   0  27   -3.63    6.48
  -8  -8  25    5.48    6.15
  -6  -4  25   73.54    5.92
  -5   0  25    0.43    5.60
  -7  -8  23   33.19    6.51
  -5  -4  23   64.95    6.12
  -4   0  23    1.67    5.94
  -5   9  23   61.33    7.19
  -4  -2  22   20.11    5.99
  -5  -6  21  172.33    6.50
  -5  11  21   74.24    7.05
  -6  13  21   75.04    6.47
  -7 -10  20   45.86    5.67
  -3  -1  20    8.69    4.97
  -5  12  20   57.52    6.73
  -9 -13  18   90.77    6.50
  -8 -12  18   51.61    6.60
 -11 -15  17    3.81    6.57
  -2  -1  17   69.50    5.76
  -4  12  17  226.40    7.01
  -8 -13  15    4.89    5.33
  -7 -12  15    0.98    5.58
  -4  -8  15    7.76    4.92
  -3  -6  15  205.71    5.92
  -4  13  15    9.45    5.71
  -6  16  15   10.33    6.05
  -7  17  15   96.73    7.04
 -10 -15  14   -7.47    5.97
  -5  15  14    0.04    6.37
  -3  -7  13   83.98    5.50
  -3  12  13   63.56    6.17
 -11 -16  12   69.72    6.59
  -1   8  11  253.33    6.94
  -6  17  11   70.08    6.23
  -7  18  11   -4.93    6.76
  -8 -14  10   65.98    5.54
  -3  -8  10  688.24    7.64
  -2  -6  10    1.90    5.26
  -3  13  10   38.23    5.99
  -5  16  10   42.35    6.55
 -12 -17   8    1.54    6.59
  -9 -15   8    8.22    5.23
  -4  15   8  156.32    6.17
 -12 -17   7    8.88    6.56
  -9 -15   7   -8.38    5.34
  -4 -10   7  115.45    5.47
  -4  15   7   60.30    5.85
 -12 -17   6   14.44    6.72
  -9 -15   6   27.34    5.40
 -12 -17   5    9.76    6.68
  -9 -15   5  117.38    5.72
   0   6   5    1.77    4.22
  -2  12   5   18.34    4.91
  -9 -15   4   50.52    5.57
   0  -1   4   53.87    5.96
   0   6   4   49.68    4.82
  -2  12   4    2.38    4.73
  -4 -10   3   31.20    5.36
   0  -1   3   21.91    5.39
   0   6   3  643.11    8.51
  -2  12   3  215.31    5.73
   0   6   2  328.20    6.89
  -4  15   2   32.93    5.68
 -11 -16   1   15.61    6.14
  -8 -14   1    5.63    5.57
  -8  19   1   15.13    6.44
  -7 -13   0   -0.95    5.87
  -6 -12   0   11.53    4.80
   0   5   0   -2.55    4.31
  -5  16   0    8.52    5.29
  -6  17   0   -2.44    6.12
  -7  18   0   20.38    5.76
  -3  -8  -1   82.11    5.66
  -2  11  -2   13.81    5.00
  -9 -14  -3   69.04    5.62
  -4  -9  -3  240.01    6.27
  -1   8  -3   33.08    5.28
  -4  14  -3    0.85    5.63
 -11 -15  -4   14.20    6.12
  -7 -12  -4  231.54    5.79
  -5  15  -4   11.75    5.45
  -8  18  -4   24.16    6.23
 -12 -15  -6   16.54    6.08
  -1   0  -6  136.30    7.78
  -1   5  -6  167.91    5.30
  -2   9  -6   75.22    5.30
 -11 -14  -7   15.42    6.28
  -7 -11  -7   61.11    4.96
  -6  15  -7   14.08    5.23
  -7  16  -7    2.83    6.01
  -8  17  -7   23.94    5.72
 -10 -13  -8   34.30    5.51
  -2   7  -8   22.89    5.06
  -8 -11  -9  159.79    6.55
  -7 -10  -9  412.03    6.94
  -4  -6  -9  189.63    6.82
  -3   9  -9  416.04    6.28
  -6  14  -9    1.76    5.33
  -8  16  -9   -7.56    5.76
  -3   8 -10  102.95    5.33
  -5  12 -10   51.90    5.69
  -8  15 -11   75.02    6.21
 -10 -11 -12   15.35    5.44
  -3   2 -12   22.55    5.22
  -3   3 -12   33.04    5.16
 -11 -11 -13   -8.53    6.28
  -6  11 -13   13.24    5.43
 -12 -11 -14    3.63    5.92
  -6  10 -14    0.00    5.41
  -7   9 -16    2.80    5.32
 -10  13 -16   42.93    6.65
  -7   2 -18   22.74    5.71
  -7   3 -18   12.31    5.63
  -7   4 -18  118.35    6.16
  -8   1 -19    8.24    5.52
  -8   2 -19    4.73    5.49
  -8   3 -19   48.70    5.63
  -8   4 -19  126.50    5.99
 -10   9 -19   28.26    5.77
  -9   2 -20   21.07    5.35
  -9   3 -20   20.75    5.33
 -10   7 -20   75.11    6.02
 -11  -1 -21   18.84    6.14
 -11   6 -21    7.62    5.64
 -12   1 -22   -1.77    6.62
 -12   2 -22   68.51    7.12
 -12   3 -22   37.70    6.77
 -12   4 -22    9.38    6.50
  -8  -3  29    2.46    4.90
  -8  -7  26    3.99    4.40
  -7  -5  26   22.24    4.70
  -6  -2  26    9.58    4.66
  -7  -6  25   85.76    4.89
 -10 -11  24   16.78    4.67
  -9 -10  24   14.22    4.25
  -7  -7  24    1.08    4.51
  -6  -5  24  118.01    4.64
  -6  -6  23   -1.10    3.96
 -10 -12  22   25.24    4.83
  -9 -11  22    1.30    4.27
  -8 -10  22    9.86    4.41
  -6  -7  22   87.69    4.39
  -5  -5  22    3.17    4.09
 -10 -13  20   14.71    4.21
  -9 -12  20   22.64    4.47
  -8 -11  20  113.04    5.02
  -6  -9  19   12.77    3.96
  -5  -8  18    5.26    4.15
  -4  -6  18  155.29    4.41
 -10 -14  17    5.15    4.27
  -6 -10  17   -1.99    4.07
 -11 -15  16   -3.43    4.77
  -5  -9  16   -2.74    3.32
  -9 -14  14    6.96    4.42
  -8 -13  14   -2.77    3.79
  -7 -12  14   27.27    3.94
  -6 -11  14  197.72    4.99
  -2  -4  14  265.02    5.44
 -10 -15  13  105.96    4.55
  -5 -10  13  219.32    4.38
  -1  -1  13    1.05    3.71
  -2  10  13   50.24    3.86
  -4  14  13   18.40    4.04
  -4  -9  12    3.07    3.53
  -2  -5  12  222.48    5.11
  -1  -2  12  362.79    6.84
  -6  17  12   -6.98    4.20
  -7  18  12   -2.96    4.80
 -11 -16  11   12.52    4.06
  -3  13  11   65.04    4.37
  -5  16  11   68.37    4.72
 -11 -16  10    6.48    4.04
  -7 -13  10    3.41    3.96
  -6 -12  10   90.49    4.54
  -8 -14   9    5.84    3.96
  -7 -13   9   42.02    4.06
  -6 -12   9   17.14    3.39
  -5 -11   9   17.65    3.43
  -3  -8   9    0.45    3.70
  -1   9   9  515.23    6.90
  -4  15   9  111.50    4.58
  -8 -14   8    9.12    4.00
  -5 -11   8   48.70    3.71
  -1  -4   8   73.58    3.89
  -8 -14   7    9.53    3.90
  -5 -11   7   35.36    3.62
  -2  12   7   38.74    3.66
  -8 -14   6    2.75    3.94
  -4 -10   6    2.28    3.59
   0   6   6    0.20    2.98
  -2  12   6   81.15    3.93
  -8 -14   5    6.49    4.04
  -4 -10   5   62.50    4.00
  -1  10   5    7.91    3.58
  -3  14   5  100.67    4.59
  -8 -14   4   23.35    4.06
  -4 -10   4  485.77    5.75
  -1  10   4   45.93    3.89
  -3  14   4   27.37    4.23
  -8 -14   3    6.90    4.00
  -1  10   3    3.63    3.58
 -11 -16   2    8.92    4.31
  -8 -14   2   20.20    4.12
  -7 -13   2    9.51    4.20
  -5 -11   2   62.34    3.87
  -2  12   2   96.30    4.05
  -7 -13   1   41.59    4.27
  -6 -12   1   50.79    3.69
  -5 -11   1   18.19    3.61
   0   6   1 1294.95   10.51
  -2  12   1  299.78    4.78
  -4  15   1   36.47    3.96
  -1  -4   0   72.54    4.27
  -4  15   0    0.29    3.88
  -8  19   0    4.53    4.64
 -10 -15  -1   11.89    3.76
  -1   9  -1    9.99    3.59
  -5  16  -1    7.96    3.69
  -6  17  -1   67.91    4.50
  -7  18  -1   37.58    4.31
  -8  19  -1   18.69    4.48
 -12 -16  -2    4.78    4.19
  -9 -14  -2    9.28    3.94
  -3  13  -2   53.76    3.62
  -6  17  -2    7.74    4.23
  -8 -13  -3  210.16    5.04
  -2  11  -3   59.64    3.84
 -13 -16  -4    0.23    4.66
  -6 -11  -4   -0.34    3.47
  -3  -7  -4  331.20    6.14
  -2  -5  -4   76.04    4.22
  -4  14  -4   25.45    4.07
 -10 -14  -5    5.32    3.72
  -2  10  -5    1.50    3.45
  -3  12  -5  147.07    4.09
  -5  15  -5    3.95    3.86
  -6  16  -5   12.25    3.74
  -7  17  -5   24.94    4.33
  -8  18  -5   42.08    4.81
  -9 -13  -6   47.67    4.23
  -3  -6  -6   94.22    4.18
  -4  13  -6  142.01    4.56
 -13 -15  -7   -4.30    4.83
  -3  11  -7  105.06    3.84
  -5  14  -7   90.92    4.28
  -3  10  -8    8.06    3.38
  -4  12  -8   60.97    3.50
  -2   6  -9  168.12    4.65
  -5  13  -9    0.69    3.93
  -9  17  -9   11.36    4.55
 -10 -12 -10    5.75    3.81
  -3   7 -11   50.03    3.76
  -6  13 -11    8.80    3.65
  -7  14 -11    5.23    4.31
  -9  16 -11   29.11    4.66
  -3   1 -12   -0.30    3.59
  -3   4 -12    8.64    3.56
  -6  12 -12   49.57    4.04
  -4   7 -13   19.18    3.44
  -4   2 -14  371.69    6.44
  -4   3 -14  352.21    5.89
  -4   4 -14   15.11    3.53
  -5   8 -14   51.09    3.57
  -8  13 -14   -3.93    4.20
  -9  14 -14    2.90    3.92
  -5   6 -15   49.47    3.63
  -6   9 -15   48.80    4.13
  -8  12 -15   99.03    4.66
  -9  13 -15    8.74    4.16
 -10  14 -15   28.11    4.42
  -6   7 -16   71.53    4.34
  -8  11 -16   35.36    4.54
  -9  12 -16   34.55    4.20
  -6   3 -17   91.08    4.05
  -9  11 -17   43.23    4.34
 -10  12 -17   22.86    4.78
  -7   1 -18  100.10    4.85
  -8   8 -18   55.62    3.96
 -10  11 -18   10.47    3.94
  -8   5 -19   43.96    4.04
  -9   4 -20   22.83    3.87
 -11   9 -20   48.04    4.69
 -13  -7 -19   -0.20    9.46
  -2   2  18   -0.66    6.19
  -3   9  18    6.22    7.23
 -13 -10 -16   23.80    8.34
  -8   0  30    1.11    6.74
  -7  -1  28    2.54    6.06
  -6   1  27    5.53    6.52
  -9  -9  25   13.71    6.08
  -5   1  25   39.33    5.93
  -5  -2  24   23.88    5.81
  -8  -9  23   36.15    6.37
  -4   1  23  299.34    8.29
  -7  -9  21   62.54    5.58
  -4  -3  21  118.24    6.67
  -4  10  20    8.05    5.68
 -11 -14  19   -7.46    6.70
  -3   8  19   18.23    6.07
  -6  15  18    1.06    5.92
  -9 -13  17  108.32    6.59
  -8 -12  17  229.94    6.09
  -7 -11  17   17.57    5.58
  -3  10  17    2.49    5.78
  -5  14  17   15.92    6.48
  -3  -5  16    6.56    5.08
  -2  -2  16    1.75    5.17
  -2  -3  15   23.50    5.42
  -4  -8  14  264.85    5.99
  -3  12  14   12.04    5.90
  -9 -14  13   11.95    6.31
 -10 -15  12   28.98    6.21
  -3  -7  12  110.71    5.60
  -4  -9  11  193.98    5.73
  -2  11  11   14.90    4.92
  -1  -3  10 1132.28   10.66
  -4  15  10   46.41    5.61
 -11 -16   9   16.37    5.80
  -2  -6   9   76.38    5.67
 -11 -16   8   14.65    5.86
  -7 -13   8   14.23    5.82
  -6 -12   8   79.65    5.05
  -3  -8   8 1426.65    9.67
   0   5   8   53.17    5.09
  -2  12   8  131.83    5.47
  -7 -13   7   11.85    5.87
  -6 -12   7  151.50    5.23
  -1  -4   7  592.52    8.15
   0   0   7   -0.63    4.48
  -3  14   7  301.53    6.77
  -5 -11   6   14.41    4.87
  -1  10   6    6.73    5.00
  -3  14   6   95.20    6.22
  -5 -11   5   80.28    5.20
 -11 -16   4   -1.85    6.07
  -7 -13   4   80.48    6.09
  -5 -11   4   27.56    5.08
 -11 -16   3   22.77    6.12
  -7 -13   3   35.23    6.01
  -6 -12   3    7.45    4.89
  -5 -11   3  332.62    6.14
  -3  14   3   78.43    6.04
  -6 -12   2   12.30    4.88
  -1  10   2   13.41    5.06
  -3  14   2   24.81    5.76
 -10 -15   0   19.52    5.45
  -3  -8   0    6.41    5.24
  -2  12   0  148.32    5.40
 -12 -16  -1   14.80    6.09
  -2  -6  -1 2221.69   13.71
   0   5  -1   21.71    4.47
  -4  15  -1    7.91    5.55
  -4  -9  -2   13.89    5.12
   0   3  -2  146.39    6.30
  -1   9  -2   13.91    4.98
  -5  16  -2    7.25    5.27
  -7  18  -2   -3.60    5.66
 -11 -15  -3   16.01    6.16
  -5 -10  -3    5.95    5.01
  -3  13  -3    2.11    4.57
 -12 -15  -5   44.89    6.06
  -4  -8  -5   23.89    5.21
  -1   7  -5   57.47    4.40
  -8 -12  -6   91.76    6.32
  -5  -9  -6    4.37    5.04
  -1   6  -6  201.13    5.32
  -2  -3  -7   71.57    6.40
  -1   3  -7   38.86    4.59
 -12 -14  -8    2.23    6.03
  -9 -12  -8   18.98    5.65
  -5  -8  -8   75.61    5.43
  -6  15  -8   93.49    5.51
  -7  16  -8  108.79    6.24
  -8  17  -8    4.21    5.53
 -11 -13  -9   -0.53    6.24
  -2   2 -10  285.25    6.69
  -2   3 -10   26.85    4.30
  -7  15 -10    4.87    5.90
  -8  16 -10    5.40    5.78
 -11 -12 -11    1.56    6.22
  -5  -6 -11  845.74   11.51
  -4  10 -11  164.96    5.18
  -9 -10 -12    0.88    5.65
  -8  -9 -12   14.97    5.92
  -7  -8 -12   18.63    4.86
  -3   5 -12   75.07    5.24
 -13 -12 -13   28.05    6.85
  -7  13 -13  -11.17    5.66
  -8  14 -13   -9.68    5.94
  -9  15 -13    2.38    6.53
  -4   1 -14   13.54    5.09
  -7  12 -14   26.06    5.27
  -7  11 -15    0.17    5.15
  -6   2 -17  122.32    5.54
  -6   4 -17  197.79    6.23
  -7   8 -17    2.58    5.34
  -8  10 -17    3.65    6.11
  -7   5 -18  180.93    6.38
  -9  10 -18   23.26    5.90
  -9   8 -19   40.68    6.09
  -9   1 -20   21.33    5.34
  -9   5 -20   77.73    6.40
 -10   2 -21   14.31    6.13
 -10   3 -21    5.97    6.02
 -10   4 -21   57.22    6.25
 -11   7 -21    4.87    6.46
 -12   0 -22    4.86    6.72
  -9  -6  28   36.12    5.00
  -8  -4  28   47.14    4.50
  -9  -7  27   10.46    4.91
  -7  -3  27    9.00    4.50
  -9  -8  26  107.41    4.74
 -10 -10  25   52.34    5.00
  -8  -8  24   -4.52    4.43
  -9 -10  23   44.85    4.41
 -11 -13  21   37.56    4.92
  -8 -10  21   -5.57    4.59
  -6  -8  20   56.85    4.30
  -4  -4  20    0.58    3.42
  -6  14  20   20.57    4.43
 -10 -13  19   -7.07    4.24
  -9 -12  19   22.31    4.41
  -8 -11  19   13.40    3.95
  -7 -10  19  100.44    4.32
  -5  -7  19   22.89    4.34
  -4  -5  19   15.86    3.48
  -3  -2  19    2.53    3.53
  -4  11  19   23.35    4.18
  -5  13  19   16.04    4.57
  -6  -9  18    0.33    4.05
  -5  -8  17    5.93    3.38
  -3  -4  17    1.22    3.55
 -10 -14  16    4.88    4.20
  -6 -10  16    4.19    4.01
  -4  -7  16   40.97    3.74
  -4  13  16    7.06    3.95
  -6  16  16    0.72    4.16
 -11 -15  15    5.21    4.07
  -5  -9  15   63.52    3.71
  -5  15  15    6.68    4.41
  -3  -6  14   16.08    3.66
  -4  14  14   60.20    4.29
 -12 -16  13    2.10    4.69
  -8 -13  13  103.93    4.29
  -7 -12  13   39.80    4.24
  -6 -11  13   41.94    4.20
  -6  17  13   64.85    4.44
  -9 -14  12    3.72    3.67
  -5 -10  12   -1.70    3.52
  -3  13  12   20.76    4.24
  -5  16  12   89.55    4.98
 -10 -15  11   36.56    4.51
  -4  15  11   94.68    4.38
 -10 -15  10   28.58    4.56
  -4  -9  10   17.35    3.65
  -1   9  10   -0.52    3.62
  -2  12   9    1.20    3.35
  -2  -6   8    8.69    3.80
  -3  14   8  279.30    5.35
  -6  18   8   -1.43    4.15
  -7  19   8    8.67    4.48
 -11 -16   7  -10.02    4.33
  -3  -8   7  109.15    4.38
   0   6   7  166.24    5.13
  -1  10   7   10.21    3.68
  -6  18   7   44.53    4.35
  -7  19   7   16.67    4.75
 -11 -16   6    0.00    4.32
  -7 -13   6  121.70    4.66
  -6 -12   6    9.75    3.35
  -1  -4   6   56.52    3.79
  -5  17   6   13.34    4.41
  -6  18   6   -0.76    4.13
  -7  19   6   13.53    4.64
 -11 -16   5   10.19    4.37
  -7 -13   5   11.52    4.11
  -6 -12   5  126.00    4.01
  -5  17   5    5.57    4.36
  -6  18   5    8.98    4.28
  -7  19   5   11.52    4.60
  -6 -12   4    0.26    3.38
   0   7   4   91.45    3.96
  -5  17   4   26.39    4.56
  -6  18   4    3.18    4.14
  -7  19   4   14.68    4.68
   0   7   3   94.17    3.95
  -5  17   3   16.85    4.47
  -6  18   3   -0.36    4.11
  -7  19   3   11.18    4.58
 -10 -15   2   12.12    3.84
  -6  18   2    9.22    4.20
 -10 -15   1    8.21    3.81
  -3  -8   1    2.59    3.75
  -1  -4   1  207.27    5.69
  -1  10   1   -1.76    3.53
  -3  14   1    0.16    3.93
 -12 -16   0   55.93    4.54
   0   6   0  181.17    4.75
  -1  10   0    2.08    3.51
  -3  14   0    0.22    4.04
  -9 -14  -1  123.45    4.54
  -2  12  -1  230.59    4.53
  -8 -13  -2  212.06    5.06
   0   2  -2  353.18    8.90
   0   4  -2   30.31    3.55
  -4  15  -2   42.48    4.08
 -13 -16  -3    5.17    4.75
  -7 -12  -3    4.80    3.38
  -6 -11  -3   12.81    3.48
  -5  16  -3   10.88    3.70
  -6  17  -3    0.30    4.26
  -7  18  -3  100.82    4.48
 -10 -14  -4    2.68    3.82
  -1   8  -4  623.42    6.46
  -2  11  -4  100.44    3.97
  -3  13  -4   76.59    3.62
  -9 -13  -5   13.29    4.01
  -4  14  -5  191.50    4.70
 -11 -14  -6   15.01    4.49
  -7 -11  -6  102.69    4.07
  -6 -10  -6   12.90    3.56
  -3  12  -6    5.83    3.25
  -5  15  -6  124.08    4.33
  -6  16  -6   -2.99    4.43
  -7  17  -6   52.14    4.35
  -8  18  -6    9.98    4.63
 -10 -13  -7    6.30    3.91
  -4  -7  -7  222.33    5.56
  -1   2  -7  317.10    6.80
  -1   4  -7    5.28    2.96
  -2   9  -7   50.55    3.77
  -4  13  -7   66.09    4.21
  -2   8  -8 1401.85    8.59
  -5  14  -8    1.22    3.82
 -13 -14  -9    0.62    4.84
  -2   7  -9   51.98    3.84
  -3  10  -9   31.73    3.47
  -4  12  -9   10.10    4.04
 -12 -13 -10    6.24    4.13
  -9 -11 -10   21.78    4.07
  -2   4 -10  621.83    7.40
  -3   9 -10    1.18    3.34
  -4  11 -10   74.52    3.62
  -6  14 -10   36.85    3.94
  -5  12 -11  149.20    4.53
 -12 -12 -12   10.79    4.28
  -4   9 -12   85.66    3.71
  -5  11 -12   -1.61    3.93
  -7  14 -12    8.18    4.25
  -8  15 -12    7.35    4.08
  -9  16 -12   92.76    4.87
  -5  10 -13   25.94    4.06
  -6  12 -13    3.81    3.79
  -4   5 -14   65.54    3.75
  -5   9 -14   10.66    4.05
  -6  11 -14   -5.20    3.77
  -5   7 -15   70.71    3.67
  -6   8 -16  121.93    4.48
  -7  10 -16    2.56    3.60
  -6   1 -17   69.76    4.10
  -6   5 -17    8.67    3.95
  -7   6 -18   25.90    3.91
  -8   6 -19   -1.16    3.68
 -10  10 -19   27.05    4.11
 -10   8 -20    0.19    4.05
  -7   9  27    5.46    9.64
  -2   3  18   12.91    7.34
  -1   5  14    7.43    7.47
   0   3   9  719.73   20.65
  -6   2  27   13.76    7.97
  -6   4  27   22.18    7.95
  -1   1  14   97.91    7.78
  -5  -1 -15   24.60    6.29
 -13  -9 -17    6.27    8.08
 -13  -8 -18   10.81    8.26
  -8   0 -19   -1.13    6.62
 -10  -2 -20    1.08    7.66
  -8   1  30    7.09    6.83
  -8  -2  29   43.58    6.23
  -8  -5  27   11.61    5.92
  -6   3  27   16.71    6.53
 -10  -9  26   -0.20    6.71
  -6  -1  26   16.60    5.55
  -8  -7  25   19.28    6.24
  -6  -3  25   30.04    5.58
  -5   2  25   39.05    5.96
 -10 -11  23    3.50    6.37
  -5  -3  23   18.68    5.67
  -4   2  23   -0.54    5.92
  -7  -8  22    4.36    5.45
  -4  -1  22   -3.47    6.01
 -10 -12  21    3.55    5.82
  -9 -11  21    8.01    6.21
  -6  -7  21  169.12    6.35
  -4   9  21   -0.46    5.49
  -5  -6  20   20.19    5.90
  -3   0  20   96.34    5.86
 -11 -14  18    2.39    6.87
  -3  -3  18  180.60    6.02
  -2   0  17   -0.30    5.10
  -9 -13  16   36.01    6.27
  -8 -12  16   21.27    5.43
  -7 -11  16   50.39    5.75
  -2   8  16  371.82    8.22
  -3  11  16   93.91    6.39
 -10 -14  15   -8.48    6.10
  -2   9  15    8.01    4.94
 -11 -15  14    3.18    5.84
  -4  -8  13  292.81    6.18
  -2  -4  13   64.26    5.64
  -1   7  13  178.34    6.89
 -12 -16  12  163.32    7.06
  -8 -13  12   -7.27    5.58
  -6 -11  12  212.67    5.44
  -2  11  12   93.64    5.37
  -9 -14  11   -7.28    5.26
  -5 -10  11   87.38    5.19
  -3  -7  11   27.25    5.32
  -2  -5  11  607.66    7.89
 -10 -15   9   -4.34    6.25
   0   4   9  191.28    8.14
  -3  14   9  173.36    6.37
  -6  18   9   39.72    5.90
  -1  10   8   77.16    5.49
  -5  17   8    8.39    6.24
  -5  17   7   -6.99    6.21
  -3  -8   6  416.38    6.83
  -3  -8   5   15.10    5.23
   0   7   5  261.15    6.12
 -10 -15   3    6.93    5.29
  -3  -8   3  131.01    5.87
  -3  -8   2    0.88    5.23
   0   7   2    6.67    4.22
  -5  17   2   24.64    5.70
  -7  19   2    9.93    6.70
 -12 -16   1   15.06    5.87
  -5  17   1   23.70    5.71
  -6  18   1    2.58    5.77
  -7  19   1    6.98    6.50
  -9 -14   0    4.63    5.63
  -2  -6   0  479.58    7.54
  -4  -9  -1    4.56    5.06
  -3  14  -1  128.10    5.98
 -13 -16  -2   30.53    6.81
 -11 -15  -2    7.61    6.20
  -7 -12  -2  315.64    6.02
  -5 -10  -2  221.25    6.07
  -2  12  -2   41.03    4.92
  -3  -7  -3  259.59    5.99
  -1   9  -3   23.29    5.09
 -12 -15  -4   -5.82    6.06
  -6  17  -4   13.18    5.98
  -7  18  -4    8.04    5.56
 -13 -15  -6   -7.34    6.41
  -2  10  -6    9.10    4.84
  -1   5  -7    7.75    4.12
  -7  17  -7   -2.38    5.79
  -8 -11  -8  178.78    6.60
  -6  -9  -8   24.07    5.05
  -3  11  -8    5.14    4.64
  -6  15  -9   38.08    5.21
  -7  16  -9  -16.63    6.05
  -8  17  -9  153.08    6.94
  -8 -10 -10   -1.78    5.89
  -6  -8 -10   63.45    5.39
  -4  -5 -10  303.88    8.54
  -2   5 -10  503.78    7.32
  -5  13 -10   71.44    5.63
 -13 -13 -11   46.15    6.61
  -3   8 -11  254.95    5.77
  -3   6 -12   56.88    5.14
  -6  13 -12    4.26    5.14
 -10 -10 -13   24.14    5.57
  -7  -7 -13   66.12    5.47
  -4   8 -13   11.83    4.67
 -11 -10 -14    9.26    6.24
  -4   6 -14    3.29    4.70
 -12 -10 -15   16.19    6.10
  -6  10 -15   13.26    5.41
  -9  14 -15   15.84    6.57
  -5   3 -16   81.28    5.22
  -5   4 -16   14.95    4.69
  -9  13 -16   89.10    5.98
  -6   6 -17   45.11    5.79
  -9  12 -17   -8.06    5.71
  -7   0 -18    3.93    5.74
  -8   9 -18   13.64    6.25
  -9   9 -19    9.50    5.73
  -9   0 -20   55.96    5.78
  -9   6 -20    2.31    6.06
 -10   1 -21   43.23    6.37
 -10   5 -21   20.16    5.93
  -8  -6  26    7.07    4.37
  -7  -4  26   60.36    4.87
  -7  -5  25   36.60    4.78
  -9  -9  24   13.68    4.32
  -7  -6  24   21.89    3.95
  -6  -4  24   20.32    4.12
  -5  -1  24    8.00    4.03
  -7  -7  23    9.44    3.78
  -8  -9  22   17.91    4.55
  -6  -6  22   13.88    4.07
  -5  -4  22  136.66    4.91
  -5  -5  21    1.93    4.15
 -11 -13  20   70.98    5.17
  -7  -9  20    9.90    4.03
 -10 -13  18    5.65    4.16
  -9 -12  18   19.61    4.52
  -8 -11  18   77.50    4.22
  -7 -10  18    2.31    3.97
  -4  12  18    3.54    4.01
 -11 -14  17   -3.14    4.04
  -4  -6  17   36.17    3.72
 -12 -15  16    4.05    4.62
  -5  15  16   26.57    4.62
  -9 -13  15   41.32    3.95
  -7 -11  15    6.95    3.98
  -6 -10  15    6.69    4.06
  -4  -7  15   10.91    3.60
  -3  -5  15   25.66    3.80
 -10 -14  14    5.08    4.32
  -5  -9  14    0.11    3.37
  -2  10  14  176.44    5.02
  -6  17  14    1.12    4.15
 -11 -15  13   48.75    4.39
  -5  16  13   23.54    4.58
  -7 -12  12   83.33    4.40
  -1   8  12    1.18    3.61
  -4  15  12   12.58    3.96
 -12 -16  11   14.66    4.88
  -8 -13  11   46.57    4.14
  -7 -12  11   54.09    4.34
  -6 -11  11   -2.72    3.32
  -1  -2  11  111.45    4.45
 -12 -16  10   21.69    4.34
  -9 -14  10   -5.04    3.80
  -5 -10  10   28.94    3.51
  -2  12  10   22.86    3.55
  -3  14  10  244.73    5.34
  -6  18  10    1.10    4.09
 -12 -16   9    5.02    4.18
  -9 -14   9   20.21    3.88
  -4  -9   9  926.65    7.11
  -1  -3   9  223.48    5.43
  -5  17   9   11.80    4.37
 -10 -15   8   -2.52    4.38
  -4  -9   8    5.14    3.67
 -10 -15   7    1.37    4.38
  -2  -6   7  180.78    4.38
  -4  16   7   12.09    3.88
 -10 -15   6    7.13    3.73
  -2  -6   6   -0.37    2.95
   0   7   6   66.14    4.36
  -4  16   6   -1.87    3.80
 -10 -15   5   -0.02    3.78
  -1  -4   5  159.42    4.87
  -2  13   5    6.97    3.42
  -4  16   5   28.24    3.94
 -10 -15   4   90.13    4.13
  -3  -8   4   37.14    3.96
  -1  -4   4    3.84    3.15
  -2  13   4   31.31    3.53
  -4  16   4   23.29    3.86
 -12 -16   3   25.81    4.28
  -1  -4   3    6.63    3.26
  -2  13   3    3.15    3.32
  -4  16   3   39.20    4.06
 -12 -16   2  113.01    4.69
  -9 -14   2  122.37    4.44
  -1  -4   2   28.86    3.65
  -2  13   2   21.94    3.36
  -4  16   2   45.55    3.94
  -9 -14   1   60.53    4.24
  -2  -6   1 2258.65   13.18
   0   7   1   35.45    3.24
  -4  16   1   -2.61    3.80
  -4  -9   0  160.67    4.60
   0   7   0    0.33    2.87
  -5  17   0    7.72    4.35
  -6  18   0   46.42    4.25
  -7  19   0    6.17    4.50
 -13 -16  -1    2.53    4.84
 -11 -15  -1  131.81    4.92
  -8 -13  -1  140.32    4.71
  -5 -10  -1    6.80    3.66
   0   6  -1 1321.89   10.17
  -1  10  -1    7.23    3.49
  -6  18  -1    4.83    3.97
  -6 -11  -2  191.34    4.61
  -1  -3  -2  307.88    8.11
   0   5  -2   32.10    3.38
  -1  10  -2   -0.09    3.51
  -3  14  -2    6.61    4.02
 -10 -14  -3   24.52    4.02
  -2  12  -3   39.18    3.54
  -4  15  -3   -6.04    3.90
  -9 -13  -4  157.21    4.79
  -4  -8  -4   57.89    4.15
  -1   9  -4   -0.55    3.51
  -5  16  -4   17.90    3.77
 -11 -14  -5   19.55    4.57
  -8 -12  -5  169.54    4.99
  -5  -9  -5  444.52    6.18
  -1   8  -5  101.44    4.19
  -2  11  -5    0.55    3.40
  -3  13  -5    6.24    3.20
  -6  17  -5    7.56    4.24
  -7  18  -5   53.38    4.29
  -1   7  -6    6.78    3.62
  -4  14  -6    9.78    4.06
 -12 -14  -7    3.16    4.27
  -3  12  -7  154.07    3.98
  -5  15  -7   -0.71    3.80
  -6  16  -7    1.16    4.29
  -8  18  -7   41.71    4.64
 -11 -13  -8    2.24    4.53
  -7 -10  -8    4.37    3.37
  -2   9  -8   12.11    3.54
  -4  13  -8    2.78    3.94
 -10 -12  -9   34.47    3.94
  -5  14  -9  108.08    4.21
  -7  -9 -10    2.09    3.39
  -2   1 -10    0.62    2.91
  -2   6 -10   38.30    3.71
 -10 -11 -11   23.23    4.11
  -4  11 -11   78.36    3.64
  -6  14 -11    6.75    3.67
  -7  15 -11    1.05    4.27
  -8  16 -11    8.39    4.03
  -4  10 -12   64.01    3.60
  -8  15 -13   55.75    4.29
  -7  13 -14  149.89    4.89
  -8  14 -14    1.35    4.02
  -9  15 -14   -4.96    4.51
  -5   8 -15   30.35    4.10
  -7  12 -15   33.42    4.43
  -8  13 -15   15.82    4.10
  -5   2 -16   32.15    3.73
  -5   5 -16   15.96    3.34
  -8  12 -16   39.28    4.23
  -7   9 -17   62.79    3.98
  -8  11 -17    5.43    4.25
  -7   7 -18    1.38    3.90
  -9  11 -18    3.95    3.97
 -10  12 -18   -1.07    4.45
  -8   7 -19   15.46    3.76
  -9   7 -20   11.94    4.17
 -10   9 -20    1.54    3.88
 -10   6 -21    2.25    4.00
 -11   3 -22   10.06    4.07
 -11   4 -22    2.95    4.11
  -5   5  25    9.66    9.73
  -4   3  23    0.03    7.10
  -4   4  23    6.41    7.16
   0   1   8    0.95    5.39
  -5  -5 -12    5.48    6.02
  -8   2  30    6.25    6.68
  -9  -4  29    9.52    6.84
  -7   0  28    0.97    6.07
  -7  -2  27   98.73    6.82
  -9  -8  25   28.25    6.23
  -5   3  25    3.30    5.49
 -10 -10  24    4.67    5.79
  -6  11  24   69.78    6.59
  -6  -5  23  111.76    6.11
  -6  12  23   15.06    6.02
 -11 -12  22   14.00    6.67
  -9 -10  22   22.51    6.28
  -6  13  22   21.38    6.72
  -4  -2  21    4.65    4.82
 -10 -12  20   26.08    6.09
  -8 -10  20   53.00    5.57
  -6  -8  19    0.49    5.80
  -6  15  19    6.10    6.97
  -5  -7  18    1.19    4.78
  -5  14  18   -0.98    6.28
  -6  -9  17   44.99    5.78
  -6  16  17   -0.81    6.91
  -5  -8  16   49.87    5.12
  -8 -12  15   56.51    5.70
  -3  12  15  119.35    6.42
  -4  14  15   82.37    5.90
  -2  -3  14   33.21    5.50
  -5  16  14   38.49    6.29
  -3  -6  13  257.93    6.26
  -1   0  13   -1.78    5.26
  -3  13  13   92.79    6.12
 -11 -15  12    5.70    5.95
  -4  -8  12   14.51    5.16
  -1   9  11   54.98    5.35
  -6  18  11   25.69    6.81
  -8 -13  10    7.90    5.52
  -3  -7  10   78.64    5.53
  -5  17  10    4.52    6.07
   0   5   9  372.23    8.92
  -1  10   9    7.27    5.07
 -12 -16   8   -1.99    5.69
  -9 -14   8   40.06    5.47
   0   6   8    7.56    4.76
  -4  16   8   12.75    5.35
 -12 -16   7    1.94    5.76
  -2  13   7   71.08    5.03
 -12 -16   6   63.56    6.05
  -2  13   6   39.81    4.86
 -12 -16   5    5.48    5.89
  -1  11   5  162.78    5.69
 -12 -16   4   93.25    6.23
  -1  11   4    0.59    5.02
  -9 -14   3   65.33    5.72
  -1  11   3   50.91    5.18
  -2  -6   2  606.49    7.95
  -1  11   2  272.75    6.06
  -4  -9   1   -0.33    5.09
  -2  13   1    2.03    4.67
 -11 -15   0   -5.53    6.35
  -8 -13   0  182.27    6.35
  -4  16   0   27.52    5.51
  -7 -12  -1    8.69    4.79
  -6 -11  -1    2.84    4.95
  -5  17  -1    5.31    6.22
  -7  19  -1    4.96    6.48
  -6  18  -2    7.19    5.73
 -12 -15  -3   -8.55    6.11
  -2  -5  -3  135.63    5.78
   0   3  -3  170.71    6.41
   0   4  -3    2.05    4.34
  -1  -2  -4  145.54    9.16
  -4  15  -4    9.43    5.44
 -13 -15  -5   14.86    5.80
  -7 -11  -5   35.45    4.92
  -6 -10  -5  116.23    5.49
  -5  16  -5    2.41    5.13
 -10 -13  -6   52.43    5.69
  -9 -12  -7    8.77    5.77
  -1   1  -7  269.56    7.86
  -1   6  -7   33.29    4.24
  -2  10  -7   20.88    4.93
 -13 -14  -8   16.33    5.93
  -6  16  -8   46.79    6.23
  -7  17  -8   33.96    5.64
  -2   8  -9  153.06    5.59
  -3  10 -10    4.34    4.63
  -4  12 -10   10.19    5.55
  -7  16 -10  204.61    6.45
  -8  17 -10    9.51    6.49
 -11 -11 -12    6.03    6.43
  -3   0 -12  641.87   11.00
  -3   7 -12   91.84    5.19
  -5  12 -12   50.02    5.56
  -9  -9 -13    1.63    5.51
  -8  -8 -13   -0.64    5.74
  -5  11 -13   57.06    5.58
  -7  14 -13    5.16    5.89
 -13 -11 -14   37.05    5.92
  -4   0 -14  522.52    9.66
  -4   7 -14    4.10    4.63
  -5  10 -14   23.45    5.55
 -12  -9 -16    2.89    6.10
  -5   6 -16   -1.99    4.52
  -6   9 -16    3.19    5.34
  -7  11 -16   -3.84    5.07
  -6   0 -17    0.07    4.71
  -6   7 -17    9.30    5.52
 -10  11 -19    1.24    6.34
 -10   7 -21   10.82    5.67
 -11   2 -22   14.01    5.69
 -11   5 -22   16.95    6.63
  -8  -1  29   11.00    4.44
  -9  -5  28   18.78    5.06
  -8  -3  28   31.91    4.55
  -9  -6  27    0.12    4.27
  -9  -7  26   29.03    4.47
 -10  -9  25   89.04    5.25
  -8  -8  23   -5.90    4.48
 -10 -11  22   22.49    4.22
  -7  -8  21   -0.16    3.88
  -9 -11  20    2.69    4.46
  -4  -3  20   11.77    3.52
 -11 -13  19  122.72    4.67
  -7  -9  19   93.08    4.36
  -4  -4  19    4.93    3.44
 -12 -14  18   22.80    4.67
  -4  -5  18  143.42    4.34
 -10 -13  17    1.14    4.31
  -9 -12  17   57.63    4.01
  -8 -11  17    1.90    3.90
  -7 -10  17    0.25    3.96
  -4  13  17    6.91    3.80
 -11 -14  16    0.99    4.11
  -3  -4  16    2.00    3.66
  -2  -1  16    6.30    3.72
 -12 -15  15  131.03    5.33
  -2  -2  15  485.74    7.15
  -6  17  15   26.93    4.91
 -12 -15  14    0.96    4.87
  -9 -13  14   -0.56    3.75
  -8 -12  14   -1.13    3.89
  -7 -11  14  142.96    4.62
  -6 -10  14   15.61    3.47
 -10 -14  13   11.02    4.38
  -5  -9  13   34.99    3.63
  -2  11  13   13.24    3.47
  -4  15  13   13.55    3.89
  -2  -4  12   97.48    4.48
  -1  -1  12   85.81    4.90
  -6  18  12    3.97    4.85
 -11 -15  11  102.65    4.73
  -2  12  11   27.23    3.62
  -3  14  11    3.25    4.05
  -5  17  11    2.58    4.28
 -11 -15  10    4.53    4.34
  -7 -12  10    0.80    4.12
  -6 -11  10   84.02    3.75
  -2  -5  10  213.98    5.18
  -8 -13   9   84.76    4.40
  -7 -12   9   62.80    4.39
  -6 -11   9   29.34    3.53
  -5 -10   9    6.03    3.46
  -3  -7   9  201.53    4.83
  -4  16   9   15.91    3.75
  -8 -13   8    6.20    4.12
  -5 -10   8   -5.60    3.53
  -2  13   8    9.60    3.41
  -9 -14   7   11.83    3.91
  -4  -9   7  842.76    7.00
   0   7   7   94.08    4.65
  -3  15   7    3.91    3.95
  -9 -14   6   77.42    4.24
  -4  -9   6   37.43    3.90
  -1  11   6   31.00    3.81
  -3  15   6    0.81    3.94
  -9 -14   5  136.07    4.49
  -4  -9   5  288.03    5.10
  -2  -6   5  122.12    4.02
  -3  15   5   61.50    4.33
  -9 -14   4  180.78    4.74
  -4  -9   4   15.41    3.73
  -2  -6   4  121.09    4.17
   0   8   4   38.74    4.02
  -3  15   4   12.46    3.96
  -4  -9   3   45.50    3.89
  -2  -6   3  118.20    4.24
   0   8   3  227.80    5.24
  -3  15   3   30.23    4.07
  -8 -13   2   27.24    4.08
  -4  -9   2   42.28    3.90
   0   8   2   -1.01    3.70
  -3  15   2    1.50    3.86
 -13 -16   1    0.56    4.12
 -11 -15   1  208.05    5.37
  -8 -13   1    2.96    4.07
  -1  11   1  193.57    4.53
  -3  15   1   14.87    3.96
 -13 -16   0   43.99    4.24
  -7 -12   0  152.09    4.11
  -6 -11   0  436.18    5.59
  -5 -10   0   27.77    3.74
  -1  11   0  334.19    5.17
  -2  13   0    5.32    3.27
   0   7  -1   34.45    3.21
  -2  13  -1   30.43    3.42
  -4  16  -1   37.64    3.92
 -12 -15  -2    1.73    4.32
 -10 -14  -2   27.62    3.91
  -3  -7  -2  280.56    5.28
   0   6  -2  340.68    5.75
  -5  17  -2  113.52    4.73
  -7  19  -2    6.68    4.60
  -9 -13  -3   49.90    4.28
   0   5  -3   19.36    3.27
  -1  10  -3   15.11    3.59
  -3  14  -3  284.07    5.02
  -6  18  -3    3.21    4.15
  -7  19  -3   10.47    4.67
 -11 -14  -4   23.18    4.60
  -8 -12  -4   52.68    4.43
  -2  12  -4   20.49    3.44
  -3  -6  -5   79.47    4.00
  -4  15  -5    1.04    3.78
 -14 -15  -6   47.55    4.91
 -12 -14  -6   -0.23    4.29
  -1   8  -6  638.47    6.52
  -2  11  -6  282.34    4.72
  -3  13  -6    3.57    3.18
  -5  16  -6   26.48    3.69
  -6  17  -6   -0.49    4.16
  -7  18  -6    1.66    3.93
  -5  -8  -7   10.36    3.68
  -3  -5  -7  135.66    5.16
  -4  14  -7  352.27    5.23
  -3  12  -8    8.97    3.30
  -5  15  -8  104.62    4.13
 -14 -14  -9    4.98    4.72
 -12 -13  -9   15.53    4.37
  -9 -11  -9   31.87    4.20
  -5  -7  -9   11.06    3.66
  -3  11  -9   44.09    3.47
  -4  13  -9   47.67    4.01
 -11 -12 -10    5.74    4.46
  -2   7 -10   19.98    3.57
  -5  14 -10   10.08    3.75
  -6  15 -10   14.61    4.27
  -3   9 -11    6.14    3.32
  -5  13 -11   26.79    3.90
  -7  15 -12   27.39    4.34
  -8  16 -12   11.87    4.65
 -12 -11 -13    3.09    4.23
  -3   3 -13  101.51    4.39
  -3   4 -13   68.19    4.03
  -3   5 -13    8.82    3.43
  -4   9 -13  185.39    4.19
  -6  13 -13    8.70    3.60
 -10  -9 -14    5.15    3.85
  -6  12 -14  165.03    4.47
  -5   9 -15    5.56    3.94
  -6  11 -15   54.99    4.00
  -9  14 -16    3.89    4.41
  -7  10 -17   53.76    3.90
  -9  13 -17   27.24    4.75
  -7   8 -18  104.60    4.30
  -8  10 -18  104.09    4.65
  -8   8 -19   -1.08    4.36
  -9  10 -19   30.06    4.28
  -9   8 -20    1.93    4.14
 -10  10 -20    6.06    4.59
 -11   6 -22   13.74    4.49
 -13  -4 -21    1.15   11.98
  -5  -4 -13  351.74   14.55
 -12  -3 -21    0.92    8.99
  -5   4  25   14.49    7.89
  -6  -2 -16   33.49    7.25
  -2   7  17   62.61    6.89
  -7  -6 -14   66.93    6.56
  -7   1  28   -3.10    6.28
  -8  -4  27   17.88    6.15
  -6   0  26   14.76    5.55
  -6  -2  25    8.84    5.63
  -8  -7  24   11.98    6.22
  -9  -9  23   -2.12    6.19
  -5  -2  23   -4.35    5.76
  -4   0  22  210.49    7.47
  -5  11  22   -4.78    6.39
  -5  12  21    9.19    6.45
  -6  14  21   -2.32    6.96
  -6  -7  20   58.28    5.92
  -3   1  20    9.26    5.01
  -5  13  20    9.49    6.16
 -10 -12  19   79.35    6.40
  -5  -6  19    3.88    4.74
  -3  -1  19    9.08    4.97
  -3  10  18    6.52    5.76
  -3  11  17   69.22    6.24
  -5  15  17   -0.39    6.04
 -10 -13  16   -2.83    6.17
  -6  -9  16   19.03    5.86
  -4  -6  16  332.00    6.41
  -4  -7  14   15.78    5.07
  -1   6  14   39.94    5.75
  -3  13  14   33.98    5.90
  -9 -13  13    0.02    5.35
 -10 -14  12   18.73    6.24
  -3  -6  12   36.13    5.34
 -13 -16  11   15.37    6.50
  -4  -8  11  467.77    6.78
  -1  10  10    3.61    4.94
  -4  16  10    4.03    5.93
 -11 -15   9   37.19    6.13
  -7 -12   8  200.29    5.39
  -6 -11   8    4.32    4.86
  -1  -3   8 1024.14   10.63
  -3  15   8   54.07    5.75
  -8 -13   7  440.03    6.91
  -5 -10   7   73.47    5.20
  -1  11   7  306.27    6.41
  -8 -13   6   82.91    6.10
   0   0   6 1352.30   21.04
  -6  19   6   82.52    6.94
  -8 -13   5  214.50    6.43
   0   8   5  340.88    7.12
  -5  18   5   50.30    6.16
  -6  19   5    1.86    6.73
  -8 -13   4  234.44    6.47
  -5  18   4   11.84    6.05
  -6  19   4   47.31    6.19
 -11 -15   3  149.31    6.81
  -8 -13   3  166.14    6.31
  -6  19   3   -3.49    6.14
 -13 -16   2   22.59    5.89
 -11 -15   2   46.79    6.44
  -7 -12   1   78.54    5.07
  -6 -11   1   94.67    5.37
  -5 -10   1   -0.56    5.00
   0   8   1  146.74    4.98
  -3  15   0    8.20    5.50
 -10 -14  -1  130.11    5.94
  -1  11  -1   20.06    5.01
  -4  16  -2   30.15    5.37
  -4  -8  -3    5.62    5.13
  -5  17  -3   18.18    6.25
 -13 -15  -4   12.84    5.95
  -7 -11  -4  143.80    5.46
  -5  -9  -4   43.32    5.20
  -3  14  -4   24.41    5.72
  -2  -4  -5   52.01    5.13
  -1   9  -5  206.92    5.81
  -4  -7  -6    9.01    5.13
  -8 -11  -7  105.17    6.34
  -1   7  -7   51.59    5.18
  -4  -6  -8   26.91    5.27
  -1   3  -8 1347.51   11.74
  -1   4  -8   74.85    4.67
  -6  16  -9   -5.16    5.96
  -7  17  -9   -1.46    5.59
 -13 -13 -10    4.46    5.96
 -14 -13 -11    4.58    6.58
 -12 -12 -11    5.12    6.08
  -9 -10 -11  396.19    7.58
  -6  -7 -11  179.73    6.47
 -13 -12 -12    4.25    5.75
  -3   8 -12    2.58    4.71
  -6  14 -12   53.03    5.74
  -4   8 -14   65.03    4.81
 -11  -9 -15    2.22    6.22
  -4   4 -15   51.33    5.02
  -8  14 -15   18.83    5.60
  -5   1 -16  167.40    6.20
  -5   7 -16   36.47    5.82
  -6  10 -16   36.09    5.39
  -8  13 -16    8.65    5.75
 -12  -8 -17    4.31    5.88
  -6   8 -17    8.20    5.43
  -8  12 -17   31.33    5.93
  -9  12 -18   20.89    6.58
  -7   3 -19    7.71    5.45
  -7   4 -19    3.23    5.45
  -7   5 -19    9.05    5.47
  -8   3 -20    7.61    5.21
  -8   4 -20    6.09    5.17
  -8   5 -20    5.93    5.15
 -10   0 -21   -4.44    6.12
 -10   8 -21   -0.76    6.49
 -12  -1 -22   -0.76    6.63
 -11   1 -22    1.52    5.81
 -10  -7  27   53.22    5.03
 -10  -8  26   35.63    5.03
  -8  -5  26   12.16    4.40
  -7  -3  26    5.86    4.57
  -8  -6  25    6.84    4.29
  -5   0  24  328.22    6.66
 -11 -11  23   -2.67    4.77
 -10 -10  23   19.95    4.09
  -7  -7  22    1.93    3.94
  -5  -3  22   29.50    4.31
 -11 -12  21    6.60    4.05
 -10 -11  21    9.44    4.25
  -9 -10  21   67.07    4.79
  -8  -9  21    0.60    3.78
  -6  -6  21    3.20    4.07
 -12 -13  20  -10.94    4.74
  -5  -5  20    6.46    4.20
  -9 -11  19   10.33    4.56
  -8 -10  19    6.86    3.85
 -11 -13  18   52.10    4.33
  -6  -8  18  154.16    4.79
  -3  -2  18   47.80    4.02
  -6  16  18    2.64    4.77
 -12 -14  17   35.06    4.87
  -5  -7  17  198.22    4.48
  -3  -3  17   20.56    3.81
  -9 -12  16   18.12    3.81
  -8 -11  16   12.76    3.86
  -7 -10  16    9.04    4.14
  -4  14  16   42.40    4.72
  -6  17  16    7.76    4.66
 -11 -14  15    7.15    4.20
  -5  -8  15   43.80    3.72
  -5  16  15    5.43    4.16
  -3  -5  14  124.83    4.44
  -4  15  14   61.48    4.75
 -12 -15  13   80.02    4.45
  -8 -12  13   19.29    4.14
  -7 -11  13    2.32    4.18
  -6 -10  13    4.07    3.30
  -6  18  13    2.90    4.51
  -9 -13  12    7.92    3.82
  -5  -9  12    1.98    3.42
  -2  12  12   12.91    4.21
  -3  14  12   86.48    4.47
  -5  17  12    0.68    4.19
 -10 -14  11   -0.52    3.79
  -4  16  11    5.98    4.52
 -13 -16  10   10.19    4.62
 -10 -14  10   12.05    3.77
  -1  -2  10   27.24    3.43
 -13 -16   9   12.91    4.71
  -2  -5   9  202.94    4.70
  -2  13   9   42.99    4.34
  -3  15   9   10.81    4.07
  -6  19   9   -8.52    4.67
 -13 -16   8   13.07    4.77
 -11 -15   8   -9.19    4.37
  -3  -7   8   14.45    3.70
   0   7   8   46.91    4.18
  -1  11   8   22.97    3.68
  -5  18   8    9.64    4.18
  -6  19   8   29.61    4.75
 -13 -16   7    1.79    4.71
 -11 -15   7    8.06    4.41
  -7 -12   7   11.20    3.35
  -6 -11   7  152.51    4.19
  -5  18   7   44.79    4.52
  -6  19   7    6.15    4.66
 -13 -16   6    6.76    4.14
 -11 -15   6   15.92    4.44
  -7 -12   6   76.14    3.75
  -6 -11   6   39.55    3.68
  -5 -10   6   50.70    3.82
   0   8   6  615.63    7.48
  -5  18   6   12.35    4.29
 -13 -16   5    2.00    4.12
 -11 -15   5   74.56    4.68
  -7 -12   5   55.32    3.65
  -6 -11   5   -1.39    3.40
  -5 -10   5  128.41    4.17
  -4  17   5   30.87    4.49
 -13 -16   4   23.44    4.17
 -11 -15   4   56.02    4.72
  -7 -12   4    7.16    3.37
  -6 -11   4   12.81    3.47
  -5 -10   4    8.11    3.64
  -4  17   4  124.91    4.29
 -13 -16   3    0.86    4.07
  -7 -12   3  156.11    4.19
  -6 -11   3   95.90    4.07
  -5 -10   3   71.21    3.92
  -2  14   3    6.58    3.30
  -4  17   3   11.73    3.74
  -5  18   3    5.15    4.14
  -7 -12   2   42.67    3.69
  -6 -11   2  424.69    5.49
  -5 -10   2    4.25    3.61
  -4  17   2    5.52    3.70
  -5  18   2  157.60    4.92
  -6  19   2    7.82    3.93
  -5  18   1    6.69    4.32
  -6  19   1   -0.85    3.91
 -10 -14   0   17.78    3.97
   0   8   0   35.47    3.19
  -5  18   0  156.57    4.89
  -6  19   0   -1.34    3.90
 -14 -16  -1    4.88    4.62
 -12 -15  -1   54.09    4.59
  -3  -7  -1   65.60    3.61
  -3  15  -1   13.23    3.92
  -9 -13  -2  159.35    4.83
  -2  -5  -2  228.35    5.65
   0   1  -2  451.84   12.88
   0   7  -2    8.96    3.01
  -1  11  -2  550.07    5.81
  -2  13  -2   24.99    3.35
  -3  15  -2    1.86    3.89
 -11 -14  -3   -0.56    3.77
  -8 -12  -3    4.02    4.14
   0   2  -3   63.55    4.61
   0   6  -3  583.27    6.88
  -2  13  -3   25.95    3.35
  -4  16  -3  119.31    4.20
  -6 -10  -4    7.64    3.49
  -1  10  -4   32.52    3.64
  -5  17  -4  141.77    4.85
  -6  18  -4   30.31    4.21
  -7  19  -4   12.01    4.40
 -14 -15  -5   40.16    4.94
 -10 -13  -5   98.83    4.46
  -2  12  -5    5.29    3.28
  -3  14  -5  159.00    4.55
  -9 -12  -6   23.48    4.18
  -4  15  -6    1.16    3.79
 -13 -14  -7   57.34    4.54
 -11 -13  -7   18.92    3.88
  -7 -10  -7  107.56    4.15
  -6  -9  -7   78.63    4.11
  -2  11  -7   20.03    3.49
  -3  13  -7   16.03    4.06
  -5  16  -7   -1.25    3.62
  -6  17  -7   25.84    4.30
  -7  18  -7   20.70    4.51
 -10 -12  -8    2.54    3.93
  -1   5  -8  298.77    5.20
  -1   6  -8  192.06    4.86
  -2  10  -8    9.18    3.49
  -4  14  -8   84.15    4.25
  -2   9  -9   37.60    3.67
  -5  15  -9    7.27    3.60
  -2   8 -10  212.03    4.57
  -3  11 -10   58.46    3.57
  -4  13 -10   11.90    3.93
  -2   3 -11    1.15    3.58
  -2   4 -11   20.23    3.70
  -2   5 -11  138.21    4.48
  -3  10 -11   10.33    3.32
  -4  12 -11    5.79    3.90
  -6  15 -11   51.45    4.49
  -7  16 -11    7.15    3.95
  -4  11 -12  207.11    4.79
  -5  13 -12   16.81    3.77
  -3   2 -13   51.93    4.04
  -3   6 -13  127.82    4.17
  -4  10 -13   -0.52    3.96
  -5  12 -13   14.51    3.79
  -7  15 -13    0.04    3.98
  -8  16 -13    4.54    4.56
  -5  11 -14    6.16    3.73
  -7  14 -14   32.11    4.26
  -8  15 -14    5.28    4.60
  -4   3 -15  225.79    5.20
  -4   5 -15    9.49    3.37
  -4   6 -15  279.01    4.97
  -7  13 -15   24.06    4.34
  -7  12 -16   68.64    4.58
  -6   4 -18   28.34    4.13
  -6   5 -18   32.23    4.06
  -7   9 -18   -0.34    3.58
  -8  11 -18   13.44    4.19
  -7   6 -19    8.63    3.89
  -8   9 -19   13.05    4.29
  -9  11 -19    9.27    3.94
  -8   6 -20   19.66    4.50
  -9   9 -20   43.32    4.14
  -9   3 -21   20.60    4.42
  -9   4 -21   13.89    4.33
  -9   5 -21    4.53    4.23
  -5   8  24    3.08    9.11
  -4  -4 -11  149.89    9.59
 -12  -6 -19    2.07    8.25
  -1   2  14   26.65    7.04
  -2  -1  -9  361.95   12.96
  -9  -8 -14   40.72    7.03
  -7  -5 -15   22.74    6.13
 -12  -7 -18   39.51    7.62
 -11  -2 -21    7.62    7.34
  -9  -3  29   25.68    7.04
  -8   0  29   -0.51    5.87
 -10  -6  28    8.79    6.68
  -8  -2  28   16.89    6.23
  -7   2  28   37.94    6.38
  -7  -1  27   57.14    6.70
  -7  -4  25   76.17    5.77
  -9  -8  24   69.19    6.37
  -7  -5  24   15.64    5.59
  -6  -3  24   74.67    5.99
  -7  -6  23   93.63    5.91
  -6  -4  23    5.72    5.65
  -5  10  23   41.09    6.81
  -8  -8  22   38.01    5.55
  -6  -5  22   57.88    6.07
  -5  -4  21   -4.83    5.99
  -7  -8  20   59.37    5.81
  -4  11  20   52.26    5.86
  -6  15  20   33.13    6.84
  -3   9  19  127.32    7.01
  -4  12  19   14.91    5.50
  -5  14  19   41.87    6.30
 -10 -12  18   73.82    6.52
  -7  -9  18   -1.97    5.67
  -4  -5  17    2.83    4.92
  -2   1  17   71.15    6.01
  -2   9  16   38.19    5.18
  -3  12  16   -0.95    5.75
 -10 -13  15    5.49    6.21
  -2  10  15   16.81    4.85
 -11 -14  14   10.89    6.08
  -4  -7  13   28.29    5.07
  -2  -3  13  140.82    6.14
  -1   8  13  161.68    6.40
  -5  17  13   14.83    5.98
 -12 -15  12   43.21    6.07
  -8 -12  12   69.27    5.85
  -6 -10  12   19.10    4.78
  -1   9  12    3.04    5.03
  -9 -13  11   61.78    5.63
  -5  -9  11   55.22    5.12
  -4  -8  10    5.81    5.13
  -2  13  10    5.03    5.88
 -10 -14   9    2.52    5.31
   0   6   9  224.47    7.36
  -3  -7   7   11.54    5.31
  -1  -3   7   51.73    4.96
   0   8   7   41.80    5.66
  -4  17   7   34.95    6.35
  -4  17   6  177.70    6.85
  -2  14   5    6.00    5.87
  -1  12   4   66.17    5.12
  -2  14   4  127.94    6.12
  -1  12   3   -5.01    4.87
  -1  12   2   27.57    4.94
  -2  14   2  111.43    4.98
 -10 -14   1   30.77    5.56
  -2  14   1    0.05    4.54
  -4  17   1  136.24    5.73
 -14 -16   0   12.08    6.68
 -12 -15   0    6.85    6.15
  -3  -7   0  816.98    8.30
  -9 -13  -1    1.80    5.74
  -1  -3  -1   84.05    5.97
   0   8  -1  143.40    4.93
  -6  19  -1   13.42    6.18
 -13 -15  -3    3.56    5.90
  -5  -9  -3  208.95    6.15
   0   4  -4   98.19    5.26
   0   5  -4  111.72    5.03
  -4  16  -4   35.93    5.32
 -12 -14  -5    5.37    6.14
  -5  17  -5   74.94    6.24
  -6  18  -5   29.28    5.71
  -1   9  -6   24.06    5.01
  -1   8  -7   56.04    5.30
 -14 -14  -8    2.21    6.78
 -12 -13  -8   19.08    6.19
  -1   2  -8   69.23    5.01
  -8 -10  -9   52.52    6.18
  -7  -9  -9   44.69    5.07
  -6  -8  -9  198.63    6.33
  -3  12  -9   68.72    4.89
 -10 -11 -10  155.89    6.22
  -7  17 -10   -9.30    6.07
  -8  -9 -11   53.62    6.14
  -7  -8 -11    7.84    4.87
  -2   6 -11  122.04    5.47
  -5  14 -11    6.08    5.21
 -10 -10 -12   16.43    5.55
  -3   9 -12    0.77    4.60
  -3   7 -13  224.40    5.77
  -8  -7 -14   14.31    5.77
  -4   9 -14    9.13    4.50
  -6  13 -14    7.59    5.63
 -13 -10 -15   14.11    5.77
 -10  -8 -15    2.80    5.36
  -4   2 -15   10.68    4.91
  -5  10 -15   34.49    5.47
  -6  12 -15   30.40    5.23
 -11  -8 -16  105.92    7.23
  -5   8 -16   41.03    5.70
  -6   9 -17   32.70    5.43
  -7  11 -17   91.32    6.38
  -6   3 -18   86.94    6.14
  -6   6 -18   86.11    5.86
  -8  -1 -19    6.63    5.57
  -7   2 -19   70.78    5.92
  -8   2 -20    3.57    5.32
  -9   6 -21   -0.09    5.83
 -10   9 -21   40.30    6.41
  -9  -4  28   11.07    4.21
  -9  -7  25   11.93    4.45
 -11 -10  24    1.54    4.82
 -10  -9  24   17.66    4.21
 -11 -11  22    3.32    3.97
 -10 -10  22   26.39    4.43
  -9  -9  22    2.17    4.39
  -4  -1  21  205.24    5.24
 -11 -12  20   12.30    4.23
 -10 -11  20   77.04    4.64
  -8  -9  20    4.13    3.91
 -12 -13  19    8.79    4.78
  -6  -7  19  180.08    4.96
  -9 -11  18    8.15    3.80
  -8 -10  18   13.51    3.87
  -5  -6  18   44.66    3.67
  -4  13  18   91.25    5.12
 -11 -13  17   96.95    4.83
  -6  -8  17    0.52    4.17
 -12 -14  16    5.46    3.95
  -5  16  16   10.52    4.27
  -9 -12  15   11.16    3.85
  -8 -11  15   18.43    4.10
  -7 -10  15   96.61    4.44
  -6  -9  15   91.75    3.90
  -4  -6  15  114.00    4.27
  -3  -4  15   64.59    4.11
 -13 -15  14    3.41    4.69
 -10 -13  14   19.38    3.77
  -5  -8  14  118.63    4.04
  -2  11  14  301.32    6.13
 -11 -14  13    4.28    4.32
  -3  14  13   86.09    4.50
  -7 -11  12  258.26    5.16
  -4  16  12    9.50    4.48
 -12 -15  11   16.79    4.17
  -8 -12  11   11.84    4.06
  -6 -10  11    6.91    3.42
  -3  -6  11  302.12    5.37
  -2  -4  11   27.31    3.92
  -1  10  11    8.21    3.46
 -12 -15  10   60.57    4.57
  -9 -13  10    7.10    3.86
  -3  15  10   52.96    4.24
  -5  18  10   -3.27    4.08
  -4  -8   9  121.54    4.31
  -1  11   9   19.52    3.62
  -5  18   9    4.48    4.10
 -10 -14   8    1.15    3.81
  -2  -5   8   99.77    3.97
  -4  17   8   28.92    4.50
 -10 -14   7    9.97    3.78
  -2  14   7  112.84    4.77
 -10 -14   6   -1.37    3.85
  -3  -7   6  219.98    5.18
  -1  12   6   73.15    3.93
  -2  14   6   44.21    4.29
 -10 -14   5    6.56    3.81
   0   9   5  520.08    6.59
  -1  12   5  116.20    4.10
  -3  16   5   74.49    4.22
 -10 -14   4   12.67    4.00
   0   9   4   14.44    3.73
  -3  16   4   59.17    4.16
 -10 -14   3   14.50    3.92
   0   9   3  143.39    4.58
  -3  16   3   33.66    4.01
 -14 -16   2   86.64    5.04
 -12 -15   2   -0.86    4.43
 -10 -14   2    4.65    3.90
   0   9   2   10.39    3.70
  -3  16   2   10.06    3.76
 -14 -16   1    5.13    4.71
 -12 -15   1   59.56    4.63
  -3  -7   1  209.74    4.74
   0   9   1   -1.64    3.53
  -1  12   1   19.67    3.52
  -9 -13   0   50.49    4.18
   0   9   0   -2.67    3.57
  -1  12   0   30.91    3.61
  -2  14   0   82.79    3.66
  -4  17   0    5.68    3.60
  -2  14  -1   24.80    3.42
  -4  17  -1  111.55    4.24
  -5  18  -1   18.57    4.18
 -13 -15  -2    0.01    4.14
 -11 -14  -2    4.00    3.79
  -8 -12  -2    8.09    3.33
  -4  -8  -2    1.28    3.61
   0   8  -2    2.28    3.59
  -5  18  -2    2.66    4.18
  -6  19  -2   56.26    4.86
  -7 -11  -3   21.92    3.54
  -6 -10  -3  197.38    4.67
   0   7  -3   88.62    3.74
  -1  11  -3   98.00    3.97
  -3  15  -3   15.04    3.98
 -14 -15  -4   33.74    4.89
 -10 -13  -4  105.27    4.54
  -3  -6  -4  373.57    6.41
   0   3  -4  138.87    5.07
   0   6  -4   51.37    3.46
  -2  13  -4   40.84    3.45
  -9 -12  -5   20.45    4.05
  -1  10  -5  226.25    4.65
  -4  16  -5   45.45    3.92
 -13 -14  -6   40.42    4.56
 -11 -13  -6   38.30    4.01
  -8 -11  -6    1.18    3.31
  -5  -8  -6   24.45    3.79
  -2  12  -6    4.33    3.31
  -3  14  -6    6.60    3.97
  -5  17  -6   28.94    4.47
  -6  18  -6   20.64    4.18
  -4  15  -7   26.11    3.87
  -9 -11  -8    4.54    3.94
  -1   7  -8   41.97    3.84
  -2  11  -8   97.45    3.83
  -3  13  -8   40.83    4.15
  -5  16  -8   48.29    4.49
  -6  17  -8    3.07    4.01
  -7  18  -8   13.41    4.49
 -13 -13  -9   24.34    4.24
 -11 -12  -9   39.22    4.00
  -2  10  -9   74.50    3.80
  -4  14  -9   54.05    4.03
  -5  15 -10    5.33    3.69
  -6  16 -10   35.50    4.29
  -2   2 -11    3.11    3.63
  -2   7 -11    1.60    3.38
  -4  12 -12   52.87    4.03
  -6  15 -12    2.10    4.19
  -7  16 -12   83.85    4.49
 -11 -10 -13   77.27    4.42
  -6  14 -13   17.37    4.24
 -12 -10 -14   11.86    4.38
  -4   7 -15   16.82    3.34
  -8  15 -15    6.25    4.48
  -6  11 -16   23.70    3.71
  -8  14 -16    5.97    4.64
  -5   4 -17   15.06    3.34
  -5   5 -17    4.24    3.22
  -8  13 -17   12.52    4.02
  -6   2 -18    9.22    4.11
  -6   7 -18    4.78    3.84
  -7  10 -18    6.02    4.30
  -7   7 -19  124.23    4.40
  -8  10 -19   12.23    4.13
  -8   7 -20   63.11    4.57
  -9  10 -20    2.60    3.95
  -9   2 -21    1.51    4.32
  -9   7 -21   -0.04    4.04
 -10   4 -22   17.70    4.20
 -10   5 -22   -1.94    3.92
  -4   8  22    9.45    8.01
  -3   7  20    5.96    8.35
  -6  10  25   28.81    7.80
  -7  -1 -18  107.80    8.04
  -9  -1 -20   23.11    6.61
  -9  -5  27   31.23    6.20
  -8  -3  27   25.94    6.20
  -9  -6  26   43.77    6.22
  -6   1  26   13.97    5.53
 -10  -8  25   36.89    5.92
  -6  -1  25   55.23    5.79
  -5   1  24    4.62    5.72
  -8  -7  23   60.73    5.48
  -5  -1  23   44.95    6.05
  -4   1  22    0.75    5.88
  -7  -7  21    4.96    5.64
  -4  10  21   11.92    5.60
  -9 -10  20   61.20    6.16
  -3   2  20   31.50    5.33
  -3   0  19   -3.49    4.99
  -4  -4  18   -2.04    4.91
  -5  15  18   42.28    6.18
 -10 -12  17   46.39    6.49
  -5  -7  16   46.34    5.01
 -12 -14  15   30.21    5.78
  -3  13  15   53.31    6.01
  -4  15  15    0.37    6.36
  -5  17  14   13.97    5.91
 -13 -15  13   42.26    6.97
  -3  -5  13   73.29    5.54
  -2  12  13   38.76    6.04
 -11 -14  12  -10.20    6.23
  -7 -11  11   20.34    4.75
  -1  -1  11   19.58    4.44
  -2  13  11   -4.06    5.82
  -3  15  11    7.06    5.51
  -5  -9  10    2.86    4.94
 -12 -15   9    9.74    5.94
  -9 -13   9   67.44    5.72
   0   7   9    5.09    5.22
  -4  17   9    7.73    6.12
 -12 -15   8   20.18    6.00
  -2  14   8   20.72    5.88
  -2  -5   7  215.85    5.70
  -1  12   7  272.45    6.07
  -3  16   7    6.69    5.42
  -1  -3   6  428.33    8.07
   0   9   6    0.38    5.27
  -3  16   6   23.91    5.49
  -3  -7   5  326.28    5.96
   0   0   5    0.32    4.61
 -14 -16   4   52.27    6.66
  -3  -7   4  272.73    5.81
 -14 -16   3   18.86    6.61
 -12 -15   3   24.13    6.20
  -3  -7   3  532.14    6.94
  -3  -7   2  209.63    5.51
  -9 -13   1    0.46    5.68
  -3  16   1   -3.30    5.34
  -3  16   0   -2.75    5.38
 -11 -14  -1    3.41    5.34
  -8 -12  -1   35.18    4.91
  -2  -5  -1    4.43    4.36
  -1  12  -1   28.28    4.88
  -7 -11  -2   22.71    4.84
  -2  14  -2   50.45    5.36
  -4  17  -2   11.49    5.17
  -5  18  -3   52.51    6.00
  -6  19  -3   17.23    6.74
 -12 -14  -4    6.95    6.35
  -1  11  -4  159.82    5.46
  -3  15  -4    7.52    5.45
  -2  13  -5   -1.44    4.53
  -7 -10  -6    2.11    4.83
 -10 -12  -7   28.71    5.65
  -4  15  -8   56.83    5.49
  -6  17  -9   91.67    5.92
 -14 -13 -10   -0.27    6.71
 -12 -12 -10    7.88    6.20
  -2   0 -10  991.20   14.13
  -2   9 -10   -3.20    4.79
 -11 -11 -11   17.21    5.27
  -3  11 -11   29.12    4.62
  -4  13 -11   59.03    5.51
  -7  17 -11   40.65    6.48
 -14 -12 -12   -1.33    6.73
  -3   1 -13   67.23    5.68
  -3   8 -13   84.32    5.06
  -4  11 -13   31.09    5.70
  -5  13 -13    2.90    5.22
 -14 -11 -14   20.10    6.70
  -5  12 -14   -2.58    5.27
  -7  15 -14   -4.21    5.63
  -4   8 -15   -2.59    4.49
  -7  14 -15   21.95    5.77
  -5   0 -16  393.96    8.46
  -5   9 -16   -4.15    5.42
  -7  13 -16  156.82    6.27
  -5   3 -17   16.68    4.76
  -5   6 -17   52.16    5.81
  -6  10 -17    0.08    5.15
  -8  12 -18   19.39    5.62
  -7   1 -19   54.53    5.95
  -7   8 -19    2.22    5.14
  -8   1 -20    8.11    5.44
  -8   8 -20    6.48    5.91
  -9   8 -21   35.87    5.79
 -11   0 -22    7.22    5.75
 -10   3 -22   72.29    6.20
 -10   6 -22    1.10    6.08
 -10   7 -22   -1.26    6.56
 -10  -4  29    2.34    4.66
 -10  -7  26   -1.68    4.19
  -7  -2  26    0.26    4.61
 -11  -9  25   45.09    4.92
  -8  -6  24    5.66    3.67
 -12 -11  23   -3.27    4.46
  -9  -8  23   15.24    4.53
 -12 -12  21   26.85    4.76
  -6  -6  20   21.82    4.26
  -4  -2  20    2.82    3.39
 -11 -12  19   38.08    4.35
  -7  -8  19    6.79    4.00
  -5  -5  19   20.76    3.44
  -4  -3  19    6.71    3.54
 -12 -13  18    2.20    4.07
 -13 -14  17   11.01    4.58
  -9 -11  17   14.53    3.92
  -8 -10  17    0.03    3.92
  -7  -9  17   13.15    4.10
  -4  14  17  182.84    5.63
 -11 -13  16    7.52    4.18
  -3  -3  16  748.17    7.88
  -2   0  16   66.81    4.54
 -12 -14  14   -8.13    4.23
  -9 -12  14   -6.25    3.99
  -8 -11  14  114.65    4.46
  -7 -10  14    8.51    4.14
  -6  -9  14   60.95    3.76
  -2  -2  14    6.69    3.74
 -10 -13  13   21.27    3.81
  -5  -8  13    3.04    3.45
  -4  16  13    7.59    4.31
 -13 -15  12   17.70    4.09
  -4  -7  12  111.29    4.17
 -11 -14  11    2.97    4.43
  -5  18  11    8.18    4.02
  -8 -12  10   85.63    4.30
  -7 -11  10   22.57    3.43
  -6 -10  10   -4.01    3.40
  -3  -6  10   45.71    3.95
  -1  11  10    4.80    3.47
  -4  17  10   19.88    4.31
  -8 -12   9   14.15    4.09
  -5  -9   9   41.78    3.76
  -1  -2   9   38.88    3.68
  -2  14   9  147.02    4.87
  -9 -13   8   36.08    4.10
  -4  -8   8   22.08    3.73
   0   8   8 1609.93   11.50
  -1  12   8    6.45    3.46
  -3  16   8   17.20    3.93
 -14 -16   7   -3.30    4.54
 -12 -15   7    4.35    4.22
  -9 -13   7   26.61    4.11
  -4  -8   7    2.25    3.67
 -14 -16   6   20.75    4.72
 -12 -15   6   -1.45    4.32
  -9 -13   6   96.82    4.32
  -2  -5   6    3.81    3.03
  -5  19   6   38.69    4.04
 -14 -16   5   13.88    4.66
 -12 -15   5   -1.98    4.33
  -9 -13   5   -2.92    4.06
  -5  19   5   -0.88    3.98
 -12 -15   4    2.21    4.41
  -9 -13   4    8.91    4.12
  -5  19   4   61.64    4.28
  -9 -13   3   15.70    3.97
  -5  19   3   12.97    4.16
  -9 -13   2    1.36    4.03
  -5  19   2   37.61    4.21
 -11 -14   0   28.06    3.94
  -8 -12   0    0.26    3.35
  -1  -3   0  348.85    8.08
 -13 -15  -1   34.05    4.41
  -4  -8  -1    3.85    3.61
   0   9  -1    0.32    3.46
  -3  16  -1   -1.47    3.78
  -6 -10  -2   14.29    3.55
  -5  -9  -2  115.13    4.27
   0   9  -2   15.13    3.56
  -1  12  -2  151.27    4.15
  -3  16  -2    6.71    3.72
 -14 -15  -3    0.94    4.90
 -10 -13  -3  219.41    4.99
   0   8  -3  229.84    4.92
  -2  14  -3   23.68    4.03
  -4  17  -3    0.14    4.30
  -9 -12  -4  195.24    5.05
   0   7  -4   87.98    3.68
  -5  18  -4   29.76    4.22
  -6  19  -4   78.07    4.78
  -8 -11  -5    8.15    3.42
  -4  -7  -5  431.84    6.69
   0   4  -5   10.37    3.11
   0   5  -5   13.44    3.12
  -3  15  -5    7.35    3.88
  -6  -9  -6    7.98    3.53
  -1  10  -6   20.35    3.57
  -4  16  -6   11.92    3.70
 -14 -14  -7   49.58    5.20
 -12 -13  -7   -0.01    4.41
  -1   9  -7 1872.67    9.48
  -2  12  -7   12.35    3.36
  -3  14  -7    5.03    3.87
  -5  17  -7   19.19    4.22
  -6  18  -7   18.99    3.85
  -1   8  -8   87.19    4.13
  -1   4  -9   13.42    2.97
  -1   5  -9   89.86    4.30
  -1   6  -9  102.16    4.23
  -3  13  -9   33.82    4.03
  -5  16  -9    0.45    4.22
  -9 -10 -10   24.90    4.21
  -3  12 -10   -1.26    3.92
  -4  14 -10   70.02    3.98
 -13 -12 -11    5.40    4.15
  -2   8 -11  219.73    4.60
  -5  15 -11   27.81    4.38
  -6  16 -11   16.14    4.06
 -12 -11 -12    4.58    4.32
  -9  -9 -12   11.21    3.96
  -3  10 -12   19.88    3.29
  -5  14 -12   66.81    3.89
 -13 -11 -13    0.83    4.07
  -7  16 -13   21.81    4.69
  -3   4 -14  152.56    4.59
  -3   5 -14   64.58    3.86
  -4  10 -14    1.24    3.90
  -6  14 -14   -1.80    4.15
  -5  11 -15   63.69    4.09
  -6  13 -15   29.77    4.37
  -5   7 -17  377.51    5.76
  -7  12 -17    3.85    4.09
  -6   8 -18  170.94    4.66
  -8  11 -19   -3.72    3.98
  -2   8  17    1.73    5.92
  -1   7  14   13.55    6.44
 -11  -7 -17   85.16    8.39
  -9   0  30    9.38    6.64
  -9  -2  29   34.60    7.05
  -8   1  29    9.40    6.03
 -10  -5  28    8.20    6.84
  -8  -1  28   15.86    6.16
  -7   3  28    8.12    6.16
 -10  -6  27    1.62    5.79
  -7   0  27   -4.79    6.31
 -11  -8  26   30.60    6.84
  -8  -4  26   83.82    6.77
  -6   2  26   12.32    6.47
  -8  -5  25   33.97    6.50
  -7  -3  25    4.74    5.33
  -6  -2  24   27.43    5.73
 -11 -10  23   22.11    5.96
 -10  -9  23   25.24    6.21
  -6  13  23   12.27    6.94
  -7  -6  22    3.16    5.54
  -5  -2  22    7.58    5.76
  -5  12  22  112.00    7.11
 -11 -11  21   27.56    5.94
 -10 -10  21   -1.39    6.17
  -9  -9  21   62.74    5.64
  -8  -8  21   23.84    5.45
  -6  -5  21  278.09    6.99
  -5  13  21    2.70    6.00
  -5  -4  20  208.81    5.92
 -10 -11  19    1.36    6.28
  -9 -10  19   37.23    5.60
  -8  -9  19   13.79    5.57
  -6  -7  18   -3.91    5.33
  -3  -1  18   91.21    5.71
  -3  11  18   77.01    6.22
  -3  -2  17    6.49    5.15
  -3  12  17  158.73    6.59
  -5  16  17    4.77    5.83
 -10 -12  16   14.17    5.31
  -6  -8  16   73.61    5.03
  -4  -5  16  134.60    5.68
 -11 -13  15   10.71    6.15
  -2  -1  15  383.05    7.98
  -4  -6  14   80.14    5.33
  -3  14  14   37.55    5.71
  -9 -12  13    9.36    5.55
  -1   1  13    0.85    5.25
  -1   9  13   82.53    5.64
 -10 -13  12   16.33    5.43
  -1   0  12  108.71    5.91
  -1  10  12    1.61    4.92
  -3  15  12   -1.95    5.43
  -5  18  12    9.75    6.85
 -13 -15  11   28.20    5.76
  -4  17  11   30.32    6.19
 -11 -14  10   11.13    6.24
  -2  -4  10    1.08    4.25
   0   5  10  207.66    8.06
  -7 -11   9    7.62    4.72
  -6 -10   9   12.10    4.76
  -3  16   9    6.79    5.32
  -8 -12   8   27.52    5.84
  -5  -9   8    5.00    4.99
   0   9   7 1117.80    9.96
  -5  19   7    3.42    6.69
  -1  -3   5   56.99    5.23
  -4  18   5   31.67    6.13
   0  10   4   45.85    5.13
  -1  13   4    0.68    4.68
  -2  15   4    8.27    5.59
  -4  18   4   -2.89    6.03
   0  10   3    6.50    5.01
  -1  13   3   12.49    4.66
  -2  15   3    3.35    5.60
  -4  18   3    5.54    6.08
   0  10   2   -3.99    4.97
  -1  13   2    7.37    4.60
  -2  15   2   19.90    5.61
  -4  18   2   17.99    6.05
 -11 -14   1   31.07    5.43
  -8 -12   1   45.07    5.01
   0  10   1  202.38    5.88
  -5  19   1   37.46    5.74
 -13 -15   0    4.64    6.15
  -4  -8   0   37.13    5.33
  -2  -5   0   83.81    5.10
  -5  19   0   -0.78    5.59
  -7 -11  -1   -1.12    4.85
  -6 -10  -1  136.90    5.60
  -5  -9  -1   67.49    5.37
 -10 -13  -2  114.23    6.09
 -12 -14  -3   -3.47    6.28
  -1  12  -3    1.61    4.76
  -4  17  -4   53.08    6.23
 -13 -14  -5   67.66    6.23
 -11 -13  -5   70.05    5.71
   0   6  -5    3.75    4.06
  -1  11  -5  492.27    6.58
  -6  19  -5    9.64    6.40
  -3  -5  -6  334.44    7.66
  -2  13  -6   80.61    4.81
  -4  16  -7   -0.03    4.98
 -11 -12  -8    8.35    5.31
  -8 -10  -8    7.89    4.76
  -5  -7  -8   29.53    5.24
 -10 -11  -9   29.67    5.73
  -1   3  -9  121.97    5.23
  -2  11  -9   12.35    4.67
  -4  15  -9   48.14    5.32
  -5  -6 -10   68.07    5.68
  -2  10 -10   43.20    4.88
  -6  17 -10   -0.05    5.58
  -8  -8 -12   21.12    5.91
  -6  -6 -12   13.16    4.99
  -2   4 -12   12.46    5.01
  -2   5 -12   54.92    5.16
  -2   6 -12    2.66    4.79
  -3   9 -13  215.66    5.44
  -6  15 -13   27.06    6.05
  -3   3 -14   97.29    5.58
  -3   6 -14   34.96    4.98
  -9  -7 -15  278.86    8.10
  -8  -6 -15    3.02    5.76
  -4   1 -15    2.85    4.84
  -4   9 -15  127.68    6.00
 -13  -9 -16    0.49    5.81
 -10  -7 -16   20.53    5.62
  -5  10 -16    0.20    5.32
  -6  12 -16   79.16    6.36
  -5   2 -17   62.74    5.14
  -8  14 -17    7.03    6.31
  -6   1 -18   -1.54    5.72
  -7  11 -18   11.22    5.87
  -7   9 -19    7.15    6.06
  -8   9 -20    1.12    5.80
  -9  11 -20    4.73    6.17
  -9   1 -21    3.63    6.16
  -9   9 -21    9.63    6.09
 -10   2 -22   58.00    6.39
 -11   3 -23    5.59    6.53
 -11   4 -23   11.49    6.45
  -9  -3  28    7.84    4.31
 -11  -7  27   14.61    4.74
 -12 -10  24   17.69    4.53
  -9  -7  24    1.55    4.45
  -7  -4  24    6.35    3.86
  -7  -5  23    7.27    3.91
  -6  -3  23   28.34    4.12
 -12 -11  22   16.49    4.74
  -6  -4  22    3.56    4.08
  -5  -3  21   73.02    4.77
 -12 -12  20   40.88    4.34
  -7  -7  20    5.67    4.08
  -5  14  20    3.71    4.18
 -13 -13  19   71.74    4.93
 -11 -12  18   34.58    4.38
 -12 -13  17    8.11    4.23
  -5  -6  17  105.65    4.10
  -9 -11  16   50.40    4.17
  -8 -10  16   14.66    4.03
  -7  -9  16    8.31    4.14
  -4  15  16   19.29    4.37
  -5  -7  15  188.63    4.57
  -2  11  15    6.24    4.12
  -5  17  15   36.79    5.12
 -11 -13  14    5.37    4.34
  -3  -4  14   17.24    3.76
  -4  16  14   -1.88    4.42
 -12 -14  13    3.59    4.22
  -8 -11  13   60.25    4.41
  -7 -10  13  367.13    5.05
  -6  -9  13  124.64    4.07
  -9 -12  12   12.84    3.90
  -5  -8  12    0.14    3.45
  -3  -5  12    1.34    3.71
  -2  -3  12    5.16    3.75
  -2  13  12   13.76    4.12
 -10 -13  11    1.70    3.83
  -4  -7  11    2.11    3.56
 -13 -15  10   51.58    4.43
   0   6  10   50.42    4.58
  -2  14  10   44.50    4.33
 -13 -15   9    1.76    4.09
 -11 -14   9    2.07    3.72
  -3  -6   9   93.10    4.30
  -1  12   9   19.33    3.52
 -13 -15   8   24.92    4.27
 -11 -14   8   12.03    3.63
  -7 -11   8    2.09    3.33
  -6 -10   8   20.76    3.53
  -5  19   8    5.11    4.69
 -11 -14   7   12.39    3.75
  -8 -12   7  102.32    4.62
  -7 -11   7   10.75    3.37
  -5  -9   7   63.75    3.93
  -4  18   7   74.34    4.59
 -11 -14   6    7.48    3.78
  -8 -12   6    3.60    3.29
  -4  -8   6   66.90    4.16
  -1  13   6   27.04    3.48
  -2  15   6  114.80    4.58
  -4  18   6   26.23    4.22
 -11 -14   5   68.66    4.10
  -8 -12   5  106.63    3.89
  -4  -8   5  146.52    4.60
  -2  -5   5  101.77    4.20
   0  10   5   96.44    4.17
  -1  13   5   23.05    3.44
  -2  15   5    1.05    3.95
 -11 -14   4   83.43    4.24
  -8 -12   4   18.46    3.43
  -4  -8   4  353.16    5.53
  -2  -5   4   87.12    3.97
  -1  -3   4  143.01    5.22
 -13 -15   3  102.66    4.73
 -11 -14   3   10.63    3.78
  -8 -12   3   13.87    3.48
  -4  -8   3  126.94    4.46
 -13 -15   2   12.37    4.42
 -11 -14   2   69.20    4.14
  -8 -12   2   30.00    3.47
  -4  -8   2   80.81    4.21
 -13 -15   1  113.78    4.78
  -7 -11   1    0.33    3.49
  -4  -8   1   11.29    3.76
  -2  -5   1  130.32    4.50
  -1  -3   1 1111.29   13.14
  -1  13   1   11.38    3.35
  -2  15   1    8.23    3.94
  -4  18   1   -8.64    4.24
  -7 -11   0   17.77    3.48
  -6 -10   0   17.59    3.54
  -5  -9   0   54.92    3.97
   0  10   0   49.74    3.85
  -1  13   0    7.79    3.35
  -2  15   0    4.64    3.87
  -4  18   0    5.20    4.17
 -10 -13  -1  131.62    4.58
   0  10  -1  196.39    4.61
  -1  13  -1   -1.13    3.26
  -2  15  -1   16.62    3.99
  -4  18  -1   -1.49    4.16
  -5  19  -1   46.70    4.10
 -14 -15  -2   -3.40    4.18
 -12 -14  -2   30.70    4.56
  -5  19  -2    5.28    3.81
  -9 -12  -3    2.59    4.16
  -3  -6  -3  149.98    4.64
   0   9  -3  138.85    4.36
  -3  16  -3    8.17    3.82
  -2  -4  -4    1.62    2.98
   0   2  -4   75.89    4.69
   0   8  -4   39.96    3.82
  -1  12  -4   50.31    3.64
  -2  14  -4   92.95    4.25
  -7 -10  -5   22.38    3.55
  -5  -8  -5   19.56    3.71
   0   3  -5  669.70    9.03
   0   7  -5  237.88    4.63
  -4  17  -5   45.77    4.52
  -5  18  -5   71.83    4.32
 -14 -14  -6   -0.72    4.08
 -10 -12  -6   94.66    4.48
  -1  11  -6   25.01    3.54
  -3  15  -6  109.77    4.28
  -6  19  -6    9.90    4.59
  -9 -11  -7   25.62    4.24
  -1  10  -7   65.88    3.73
 -13 -13  -8   33.63    4.53
  -7  -9  -8   25.35    3.63
  -6  -8  -8   10.53    3.57
  -1   9  -8   76.45    3.98
  -2  12  -8   24.04    3.37
  -3  14  -8   65.41    4.17
  -5  17  -8   22.96    4.17
  -6  18  -8    0.69    4.55
 -14 -13  -9    2.37    3.94
  -1   7  -9   13.45    3.50
  -8  -9 -10   96.75    4.12
  -3  13 -10   18.59    4.02
  -5  16 -10   70.63    4.47
  -2   9 -11   46.55    3.52
  -3  12 -11   35.25    4.16
  -4  14 -11    4.16    3.71
  -2   7 -12    5.29    3.43
  -3  11 -12   13.55    4.08
  -4  13 -12   -2.19    3.76
  -6  16 -12    7.57    4.08
  -7  17 -12   12.22    4.51
 -10  -9 -13    3.86    3.88
  -4  12 -13    3.80    3.80
  -5  14 -13    8.20    4.31
  -3   7 -14  110.35    4.02
  -4  11 -14   26.05    3.98
  -5  13 -14   43.54    3.83
  -5  12 -15   11.85    3.77
  -7  15 -15    8.29    4.56
  -4   4 -16   25.16    3.53
  -4   5 -16   81.64    3.89
  -4   6 -16    4.90    3.28
  -7  14 -16   15.51    4.00
  -5   8 -17    4.63    3.84
  -6  11 -17  122.08    4.14
  -7  13 -17   67.04    4.34
  -6   9 -18    7.44    3.77
  -8  13 -18    5.51    4.64
  -4  -2 -13    9.38    7.34
  -7   4  28   46.27    7.90
  -6  12  24    2.82    8.36
  -6  -1 -17   70.06    6.62
 -11  -6 -18   31.02    8.00
 -10  -1 -21   44.52    7.90
  -8   2  29   44.37    6.25
  -9  -4  27   24.23    6.17
  -9  -6  25   17.15    6.36
  -6   0  25   -0.77    5.55
 -11  -9  24   10.48    5.77
 -10  -8  24    7.27    6.20
  -8  -7  22   -3.16    5.51
  -4   2  22   15.35    6.04
  -4   0  21    1.09    4.86
 -11 -11  20    4.58    5.96
  -4  12  20    5.35    6.41
  -3  10  19   30.97    5.99
  -4  13  19   25.86    6.49
  -5  15  19    5.96    6.43
 -10 -11  18   93.56    6.16
  -7  -8  18    5.14    5.81
  -4  -4  17   32.48    5.11
  -2   2  17   67.39    6.20
  -2  10  16    6.03    5.88
  -3  13  16  153.98    6.41
 -13 -14  15   11.62    5.67
 -10 -12  15   11.35    5.41
  -1   8  14    7.13    5.14
  -2  12  14   35.19    6.04
  -3  15  13    7.63    5.35
  -5  18  13   20.28    6.70
 -14 -15  12   41.55    6.52
 -12 -14  12    0.34    6.07
  -4  17  12    4.16    6.07
  -1  11  11   -4.56    4.88
 -10 -13  10   13.24    5.37
   0   4  10  235.66    9.62
  -3  16  10   42.73    5.56
   0   8   9   14.54    5.31
  -5  19   9   41.83    6.84
   0   9   8   16.53    5.37
  -4  18   8    9.32    5.93
 -13 -15   7   19.69    5.88
  -6 -10   7   10.44    4.95
  -2  15   7  112.27    6.08
 -13 -15   6   22.76    5.91
  -7 -11   6   12.30    4.89
  -5  -9   6   37.00    5.22
   0  10   6   12.12    5.06
 -13 -15   5   38.33    6.18
  -3  17   5   -2.97    5.19
 -13 -15   4  109.11    6.50
  -3  17   4    4.03    5.21
  -2  -5   3   10.41    4.50
  -1  -3   3   -4.74    4.83
  -3  17   3   74.81    5.54
  -7 -11   2    8.36    4.98
  -2  -5   2   72.85    4.99
  -1  -3   2  551.85   10.04
  -3  17   2    1.13    5.29
  -6 -10   1   18.42    5.05
  -5  -9   1    6.17    5.14
  -3  17   1  160.83    5.74
 -14 -15  -1   67.30    6.10
   0  10  -2   -4.56    4.94
  -1  13  -2   22.02    4.73
  -2  15  -2   25.73    5.62
  -4  18  -2   -5.73    5.94
 -13 -14  -4   17.26    6.18
 -11 -13  -4   88.49    5.91
  -8 -11  -4   24.42    4.89
  -4  -7  -4   14.88    5.35
  -3  16  -4    5.73    5.25
  -6  -9  -5   44.88    5.25
  -2  14  -5   75.93    5.95
 -12 -13  -6   24.76    6.43
  -5  18  -6   20.54    5.79
  -4  -6  -7    8.53    5.13
  -1   0  -7    1.09    4.25
  -2  13  -7   25.13    4.70
  -3  15  -7    1.04    5.45
  -3  -4  -8   46.36    5.06
  -1   1  -8   18.07    4.47
  -4  16  -8   12.44    5.65
 -12 -12  -9   41.11    6.39
  -4  -5  -9  116.61    6.42
  -1   8  -9  184.69    5.70
  -6  18  -9   20.73    6.40
 -11 -11 -10   80.42    5.78
  -7  -8 -10  111.52    5.62
  -6  -7 -10  308.73    7.24
  -4  15 -10   16.89    5.07
 -10 -10 -11   48.28    5.83
  -2   1 -11  157.85    6.66
  -6  17 -11   73.71    5.75
  -7  -7 -12   -0.91    4.70
  -2   3 -12   22.98    5.11
  -5  15 -12   10.36    6.02
  -3  10 -13   20.70    4.61
 -11  -9 -14    2.75    5.26
  -3   8 -14   57.10    4.88
  -7  16 -14    4.52    6.36
 -14 -10 -15    3.38    6.52
 -12  -9 -15    5.79    6.12
  -4  10 -15   23.39    5.51
  -6  14 -15   27.66    5.88
  -4   3 -16   79.51    5.28
  -4   7 -16    9.55    4.56
  -5  11 -16    1.56    5.28
  -5   9 -17  168.76    5.99
  -7  12 -18   25.13    5.70
  -6   5 -19    2.68    5.46
  -6   6 -19   -1.06    5.41
  -7  10 -19   48.34    6.16
  -8  12 -19   11.66    6.65
  -7   4 -20   14.70    5.46
  -7   5 -20  116.77    5.87
  -7   6 -20    2.97    5.18
  -7   7 -20   24.42    5.14
  -8  10 -20   16.05    5.68
  -8   4 -21   31.80    6.47
  -8   5 -21    3.19    6.06
  -8   6 -21    4.78    5.96
  -8   7 -21   14.82    5.84
  -9  10 -21   14.58    6.47
 -10   1 -22    8.90    5.80
  -8  -2  27   44.14    4.76
  -9  -5  26    3.40    4.32
  -7  -1  26   15.80    4.44
 -12  -9  25   22.87    4.75
 -10  -7  25   -1.78    4.34
  -8  -6  23   10.27    3.77
 -11 -10  22    6.21    4.11
 -10  -9  22   11.55    4.44
  -9  -8  22    0.38    3.71
 -13 -12  21    0.80    4.54
  -7  -6  21  107.81    4.60
 -10 -10  20  151.09    5.13
  -9  -9  20    0.71    3.81
  -8  -8  20  200.62    4.90
 -12 -12  19    6.69    4.15
  -6  -6  19    5.70    4.25
 -13 -13  18   24.16    4.83
  -9 -10  18   -2.10    3.82
  -8  -9  18    3.41    3.98
  -5  -5  18   10.87    3.51
  -4  14  18   22.53    4.51
 -11 -12  17   74.28    4.65
  -6  -7  17    0.46    3.37
 -12 -13  16   13.60    4.35
  -5  17  16   41.82    4.93
  -9 -11  15    6.04    3.94
  -8 -10  15    2.46    4.07
  -7  -9  15   22.68    3.43
  -6  -8  15    9.33    3.37
  -4  -5  15   36.50    3.82
  -3  14  15   64.46    4.28
  -4  16  15    4.77    4.24
 -13 -14  14   17.80    4.07
 -10 -12  14    7.97    3.82
  -5  -7  14   27.60    3.64
 -11 -13  13   32.43    4.55
  -4  -6  13    6.25    3.58
  -2  13  13    2.45    4.05
  -8 -11  12  251.27    5.12
  -7 -10  12   23.49    3.54
  -6  -9  12   79.21    3.80
 -14 -15  11   -4.51    4.66
 -12 -14  11   11.70    4.32
  -9 -12  11   20.67    4.08
  -5  -8  11    4.64    3.55
  -2  14  11   43.46    4.25
  -3  16  11   54.80    4.79
 -12 -14  10   -1.11    4.31
  -9 -12  10   25.62    4.05
  -4  -7  10  118.40    4.27
   0   7  10   46.22    4.26
  -1  12  10   66.44    3.82
 -10 -13   9   42.26    4.01
  -2  -4   9  329.28    5.76
  -4  18   9   27.76    4.33
 -10 -13   8   36.67    3.98
  -3  -6   8  159.42    4.76
  -1  -2   8  388.36    7.32
  -2  15   8  210.73    4.98
   0  10   7   43.40    3.87
  -1  13   7   29.95    3.48
  -3  17   7   42.09    4.68
  -6 -10   6   20.61    3.54
  -3  17   6    8.55    4.41
  -7 -11   5   96.58    3.84
  -6 -10   5    1.18    3.53
  -5  -9   5    1.86    3.57
  -7 -11   4   41.04    3.68
  -6 -10   4  416.63    5.49
  -5  -9   4   44.67    3.88
   0  11   4  141.09    4.43
  -7 -11   3   25.16    3.61
  -6 -10   3   95.07    4.06
  -5  -9   3    3.06    3.64
   0  11   3  360.45    5.38
  -6 -10   2   52.64    3.75
  -5  -9   2   74.00    4.12
   0  11   2    7.59    3.56
 -10 -13   1    1.31    3.95
   0  11   1   79.82    3.96
 -14 -15   0   11.11    4.05
 -12 -14   0   25.04    4.66
 -10 -13   0  141.12    4.64
   0  11   0   -2.51    3.48
  -3  17   0   11.63    3.63
 -12 -14  -1   26.57    4.56
  -3  17  -1   46.44    3.92
 -15 -15  -2   11.90    4.71
  -9 -12  -2  282.11    5.40
  -3  -6  -2    4.73    2.97
  -3  17  -2   36.34    3.81
 -13 -14  -3   -1.09    4.30
 -11 -13  -3   85.80    4.31
   0   1  -3   21.80    4.16
   0  10  -3    2.45    3.53
  -1  13  -3    0.68    3.24
  -2  15  -3    8.82    3.84
  -4  18  -3    7.38    4.14
  -5  19  -3   -8.29    4.05
  -7 -10  -4   70.77    3.94
   0   9  -4   16.10    3.56
  -5  19  -4    1.51    4.60
 -14 -14  -5   21.48    4.38
 -10 -12  -5   94.41    4.56
   0   8  -5  344.31    5.40
  -1  12  -5  175.83    4.13
  -3  16  -5    3.97    3.65
   0   4  -6  276.10    5.60
   0   5  -6    2.51    2.85
   0   6  -6    4.49    2.84
   0   7  -6   64.21    4.01
  -2  14  -6   55.74    4.27
  -4  17  -6   31.80    4.39
 -13 -13  -7    9.77    4.39
 -11 -12  -7    3.10    3.81
  -8 -10  -7   54.13    3.80
  -1  11  -7  216.63    4.43
  -5  18  -7   17.18    4.09
  -1  10  -8   12.00    3.38
  -2  13  -8   -1.41    4.05
  -1   9  -9 1216.86    7.83
  -2  12  -9   67.66    3.54
  -3  14  -9  163.93    4.51
  -5  17  -9   11.37    4.05
 -13 -12 -10    7.38    4.12
  -1   5 -10  485.77    6.43
  -1   6 -10   39.50    3.78
  -2  11 -10    4.69    3.32
 -14 -12 -11   18.39    4.29
  -2  10 -11   52.78    3.60
  -5  16 -11   16.85    4.18
  -2   8 -12  142.16    4.14
  -3  12 -12   49.85    4.06
  -4  14 -12    9.37    3.64
  -4  13 -13   87.74    4.18
  -6  16 -13    2.43    3.98
  -3   2 -14  134.65    4.82
  -3   9 -14   20.81    3.32
  -4  12 -14  163.81    4.57
  -6  15 -14   15.38    3.98
  -4   8 -16   83.35    4.42
  -6  13 -16   -0.99    4.21
  -6  12 -17   39.97    4.35
  -6  10 -18  174.31    4.48
  -6   4 -19  139.40    4.86
  -6   7 -19    9.29    3.72
  -7   3 -20    0.42    3.87
  -7   8 -20    9.49    4.40
  -8   3 -21    5.61    3.67
  -8   8 -21    5.84    4.12
  -9   4 -22    5.16    4.20
  -9   5 -22   26.82    4.22
  -9   6 -22    2.46    4.06
  -9   7 -22    8.29    3.87
 -11   2 -23   33.14    5.11
 -11  -5 -19   12.41   11.56
  -7   6  28   22.58    9.36
  -7   5  28    8.66    7.20
  -5   2  24   20.62    7.15
  -3   3  20   90.98    7.35
  -3   8  20   14.26    7.16
  -9  -6 -16   -0.82    6.71
 -10  -6 -17   14.10    6.68
 -10  -3  29    3.23    6.80
  -9  -1  29   33.63    6.58
  -8   0  28   16.24    6.16
  -7   1  27   58.87    6.73
 -10  -6  26   14.83    5.95
  -8  -3  26  100.50    6.90
  -6   3  26   76.95    7.14
 -11  -8  25    6.26    5.89
  -8  -5  24   24.07    5.60
 -12 -10  23   -3.16    6.80
  -5   0  23   -4.23    5.89
  -5  11  23    9.47    6.24
 -12 -11  21   17.85    5.74
  -4  -1  20   51.86    5.32
  -3   1  19    5.21    5.03
  -4  -3  18    1.00    4.90
  -5  16  18   -9.11    6.83
 -10 -11  17    3.63    5.22
  -2   9  17    9.46    5.98
  -5  -6  16   15.71    4.91
 -12 -13  15    8.61    6.07
  -3  -3  15  162.91    6.16
 -13 -14  13    6.06    5.87
  -2  -2  13 1002.31   10.65
  -4  17  13   41.37    6.18
 -11 -13  12   -1.87    5.28
  -8 -11  11   12.76    5.87
  -6  -9  11   47.77    5.07
  -3  -5  11   34.73    5.34
 -14 -15  10   17.60    6.35
  -1  -1  10    0.32    4.28
  -4  18  10   15.12    5.93
 -14 -15   9   -0.59    6.35
 -12 -14   9   38.94    6.20
  -2  15   9  179.34    6.29
  -1  13   8  117.28    5.39
  -3  17   8    7.16    6.28
 -10 -13   7  223.11    6.29
  -3  -6   7   57.90    4.52
 -10 -13   6  267.31    6.47
 -10 -13   5  262.50    6.56
   0  11   5  403.97    6.78
 -10 -13   4  138.37    6.11
   0   0   4  404.58   14.83
  -1  14   4   -4.50    5.80
 -10 -13   3  181.74    6.23
  -1  14   3   35.35    4.74
  -2  16   3   30.74    5.44
 -14 -15   2   -1.00    5.97
 -10 -13   2   13.89    5.68
  -1  14   2   -1.32    4.60
  -2  16   2  106.05    5.79
 -14 -15   1   74.15    6.22
 -12 -14   1   19.54    5.93
  -1  14   1    2.52    4.58
  -9 -12  -1   -3.06    5.87
   0  11  -1   82.38    5.27
  -8 -11  -3   -2.97    4.84
  -6  -9  -4    2.22    4.96
  -5  -8  -4  387.35    7.02
  -2  15  -4   57.56    5.65
  -4  18  -4   20.21    5.83
 -12 -13  -5   67.88    6.04
 -15 -14  -6   15.40    6.74
  -9 -11  -6   13.10    5.79
  -3  16  -6    1.35    5.23
  -4  17  -7   24.67    6.07
 -14 -13  -8   -0.43    5.72
 -10 -11  -8   82.54    6.17
  -3  15  -8  188.87    5.96
  -9 -10  -9  482.54    7.87
  -1   2  -9   77.27    5.04
  -4  16  -9   16.19    6.07
  -1   4 -10    4.01    5.10
  -1   7 -10   41.93    5.09
  -6  18 -10    9.00    6.27
 -12 -11 -11    9.02    6.25
  -3  13 -11    3.28    5.41
 -13 -11 -12    2.01    6.00
 -11 -10 -12   20.61    5.47
  -2   9 -12    2.94    4.63
 -14 -11 -13   19.65    6.75
 -12 -10 -13    8.73    6.21
  -9  -8 -13   31.75    5.84
  -3  11 -13   25.80    5.65
 -13 -10 -14   24.92    6.09
  -4  -1 -14   14.09    5.23
  -5  14 -14   98.45    6.29
  -5  13 -15   43.13    6.29
  -7  15 -16   -1.98    6.31
 -13  -8 -17    3.45    5.76
  -5  10 -17   25.25    5.33
  -7  14 -17   37.92    6.65
  -5   5 -18  111.61    6.16
  -5   6 -18    7.04    5.57
  -7   0 -19   -1.23    5.50
  -6   3 -19  136.50    6.35
  -6   8 -19    6.18    5.16
  -7  11 -19   91.72    6.14
  -8   0 -20    6.36    5.36
  -8  11 -20    3.50    6.44
  -9   8 -22   55.48    6.78
 -10  -4  28   88.25    4.74
 -10  -5  27    7.12    4.20
 -11  -7  26   20.73    4.09
  -8  -4  25   -4.89    3.76
  -7  -2  25   42.91    4.10
  -6  -1  24   -0.69    3.98
 -11  -9  23    9.35    4.17
 -10  -8  23    4.13    4.39
  -9  -7  23    8.87    4.51
 -13 -11  22    5.94    4.54
  -7  -5  22   10.62    4.09
 -11 -10  21   33.51    4.36
  -8  -7  21  211.34    5.01
 -13 -12  20   16.05    4.88
  -6  -5  20    9.96    4.16
 -11 -11  19   11.23    4.36
 -10 -10  19   17.19    3.77
  -7  -7  19  217.40    5.03
  -5  -4  19   83.47    4.06
  -4  -2  19   12.67    3.60
 -12 -12  18   96.34    4.65
 -13 -13  17   20.90    4.20
  -9 -10  17    6.18    3.96
  -8  -9  17   30.64    4.21
  -7  -8  17    6.10    4.08
  -4  15  17    0.79    4.32
 -11 -12  16    4.29    4.39
 -14 -14  15   43.20    4.62
 -12 -13  14   30.88    4.32
  -9 -11  14  135.72    4.54
  -8 -10  14    2.75    4.02
  -7  -9  14   32.01    3.60
  -6  -8  14    2.55    3.39
  -3  15  14   41.71    4.76
 -10 -12  13   39.28    4.01
  -3  -4  13   35.74    3.95
  -1  10  13   55.75    4.05
 -13 -14  12   -3.31    4.16
  -4  -6  12    1.31    3.61
  -1  11  12    2.56    3.38
  -2  14  12  158.57    5.02
  -3  16  12   18.65    4.68
 -11 -13  11   41.13    3.97
  -7 -10  11  193.57    4.29
  -2  -3  11   69.47    3.77
  -4  18  11    2.49    4.09
  -8 -11  10  132.17    3.96
  -5  -8  10  164.31    4.42
   0   8  10  220.30    5.66
  -9 -12   9   79.66    4.38
  -4  -7   9   17.58    3.68
   0   9   9  169.40    5.03
  -1  13   9   24.19    4.34
  -3  17   9   18.51    4.47
 -14 -15   8   -2.89    4.03
 -12 -14   8    9.85    4.39
  -9 -12   8  158.79    4.74
  -2  -4   8    4.73    3.02
   0  10   8   75.74    4.13
 -14 -15   7    0.93    4.00
 -12 -14   7   -0.53    4.39
 -14 -15   6    2.61    4.09
 -12 -14   6   30.53    4.62
  -3  -6   6   17.45    3.12
   0  11   6  445.05    5.97
  -1  14   6  172.63    4.96
  -2  16   6   21.88    3.91
  -4  19   6   40.03    4.11
 -14 -15   5    8.28    4.11
 -12 -14   5   26.11    4.54
  -1  14   5  163.82    4.85
  -2  16   5    4.58    3.76
  -4  19   5    2.00    4.11
 -14 -15   4    8.97    4.15
 -12 -14   4   22.40    3.81
  -2  16   4    3.55    3.84
  -4  19   4    9.98    4.01
 -14 -15   3   30.14    4.29
 -12 -14   3   23.45    3.81
  -4  19   3    6.34    3.92
 -12 -14   2   -4.19    3.72
  -4  19   2    2.01    3.96
  -2  16   1   -1.21    3.90
  -4  19   1    0.80    4.01
  -9 -12   0   49.52    4.36
  -1  14   0    3.57    3.19
  -2  16   0   90.80    4.23
  -4  19   0    8.15    3.97
 -15 -15  -1   -4.04    4.74
  -3  -6  -1  490.31    6.85
  -1  14  -1   24.51    3.41
  -2  16  -1   17.45    3.97
 -13 -14  -2    1.53    4.39
 -11 -13  -2  151.11    4.69
  -8 -11  -2  166.84    4.29
   0  11  -2    8.52    3.46
  -7 -10  -3   18.24    3.55
  -4  -7  -3  781.15    8.13
  -3  17  -3   12.53    3.74
 -14 -14  -4   11.32    4.26
 -10 -12  -4  163.06    4.90
   0  10  -4   35.83    3.69
  -1  13  -4   27.06    3.36
  -3  17  -4   94.67    4.14
   0   9  -5  516.00    5.91
  -2  15  -5    9.45    3.98
  -4  18  -5    4.50    4.21
  -5  19  -5   43.17    4.80
   0   8  -6  614.36    6.47
  -1  12  -6    2.00    3.30
  -7  -9  -7    0.50    3.41
  -5  -7  -7  122.17    4.72
   0   6  -7  154.29    4.14
  -2  14  -7  554.07    5.97
  -3  16  -7    0.76    3.73
 -12 -12  -8    4.82    4.41
  -1  11  -8   11.65    3.39
  -4  17  -8    6.45    4.22
  -5  18  -8    3.98    3.95
 -15 -13  -9   12.46    4.73
  -1  10  -9    9.66    3.37
  -2  13  -9   46.49    4.18
  -1   8 -10   23.66    3.55
  -2  12 -10    7.21    3.30
  -3  14 -10  109.01    4.19
  -5  17 -10    6.96    4.01
  -9  -9 -11    4.40    3.95
  -2  11 -11   49.45    3.53
  -4  15 -11   48.21    3.76
  -2   2 -12  219.02    5.65
  -5  16 -12   69.93    4.43
  -6  17 -12   14.70    4.48
  -2   5 -13   71.32    3.96
  -2   6 -13   52.53    3.81
  -2   7 -13    3.24    3.39
  -5  15 -13   41.89    4.20
  -3  10 -14   11.84    3.99
  -3   5 -15   38.65    3.59
  -3   6 -15    7.74    3.35
  -3   7 -15   86.38    3.89
  -4  11 -15    0.77    3.79
  -6  15 -15   20.63    3.95
  -4   2 -16   26.36    3.74
  -4   9 -16    9.99    4.02
  -5  12 -16   10.30    3.73
  -6  14 -16    8.15    4.10
  -5   1 -17   77.02    4.30
  -5   4 -18    3.62    4.06
  -5   7 -18   11.36    3.96
  -5   8 -18   15.40    3.87
  -6  11 -18    7.90    4.35
  -7  13 -18   61.90    4.33
  -6   9 -19   36.17    3.73
  -7   9 -20   11.18    4.26
  -8   9 -21    8.59    4.09
  -9   3 -22    7.79    4.25
 -10   5 -23   -1.29    4.64
 -10   6 -23   11.71    4.46
  -8  -5 -16    7.25    8.06
  -4   9  22   44.36    7.27
  -4  11  21   -3.10    7.96
   0   1   7  117.08    9.96
  -3  -1 -12    0.65    6.23
  -8   3  29    1.52    6.91
 -11  -5  28    1.91    6.70
  -9  -2  28    6.67    6.00
 -11  -6  27    0.81    6.83
  -6  11  25    2.91    6.79
  -9  -6  24   -2.14    6.30
  -7  -3  24    1.29    5.48
  -7  -4  23   45.53    5.84
  -6  -2  23   -3.40    5.73
  -5  -1  22    2.54    5.97
 -10  -9  21    3.71    6.37
  -9  -8  21   -7.13    5.39
  -6  -4  21    1.02    5.81
  -5  -2  21   97.22    6.44
  -5  14  21   16.58    7.08
  -5  -3  20   85.57    5.33
  -9  -9  19  124.77    5.88
  -8  -8  19    0.70    5.56
  -6  -6  18  172.82    5.52
  -3  12  18   -0.50    5.55
  -3  13  17    6.79    5.58
 -13 -13  16   17.78    6.00
 -10 -11  16   56.22    5.54
  -6  -7  16    6.45    4.86
  -4  -4  16   69.08    5.41
  -3  -2  16   16.48    5.22
  -2   1  16    5.36    5.18
  -2  11  16  213.02    7.12
  -4  16  16   -7.14    5.89
 -11 -12  15   24.97    5.29
  -2  12  15    9.21    5.84
 -14 -14  14    7.53    6.62
  -2  -1  14   68.86    5.87
  -1   9  14   15.68    4.97
  -2  13  14   19.34    5.72
  -4  17  14    7.56    5.91
  -5  -7  13    5.39    4.98
 -10 -12  12   55.43    5.71
 -13 -14  11   17.24    6.09
  -1  12  11    2.94    4.76
 -11 -13  10    7.23    5.36
  -7 -10  10   24.62    4.90
  -6  -9  10   23.62    5.00
  -2  15  10    2.29    5.54
  -8 -11   9   40.33    4.89
  -4  -7   8   44.76    5.34
  -9 -12   7  117.67    6.16
  -1  -2   7  196.03    6.59
  -2  16   7    5.52    5.45
  -4  19   7    8.81    6.15
  -3  18   4    9.66    6.07
   0  12   3  105.01    5.35
  -3  18   3   12.00    5.99
   0  12   2  202.84    5.69
  -3  18   2   64.36    6.19
  -9 -12   1   16.61    5.90
   0  12   1  407.90    6.38
  -3  18   1   -3.69    6.15
 -15 -15   0   14.44    6.71
 -13 -14  -1   37.84    6.26
 -11 -13  -1   42.74    5.64
  -4  19  -1    7.48    5.68
  -1  14  -2    7.65    4.58
  -2  16  -2   36.15    5.56
  -6  -9  -3  102.65    5.52
  -5  -8  -3   69.36    5.50
  -2  -4  -3   45.99    5.05
  -1  -2  -3   16.65    5.22
   0  11  -3  363.59    6.19
 -12 -13  -4   19.61    5.38
 -15 -14  -5   53.59    6.93
  -9 -11  -5    6.53    5.77
  -3  -5  -5   19.17    4.51
   0   2  -5 1034.78   12.82
  -1  13  -5    3.80    4.56
 -13 -13  -6   70.18    6.35
 -11 -12  -6   34.47    5.64
  -8 -10  -6    3.20    4.71
  -2  -3  -6  371.75   10.86
   0   3  -6  131.30    5.66
   0   9  -6    5.72    5.12
  -5  19  -6   -0.47    6.55
  -6  -8  -7    7.08    4.90
   0   5  -7   69.38    4.60
   0   7  -7  101.14    5.54
  -1  12  -7  185.00    5.34
 -13 -12  -9    2.24    6.08
 -11 -11  -9   15.30    5.50
  -8  -9  -9   34.24    5.01
  -3  15  -9    5.76    5.20
  -5  18  -9    8.98    6.00
 -10 -10 -10   56.10    5.97
  -1   3 -10  500.88    7.71
  -4  16 -10   95.27    6.35
  -2  10 -12  255.53    5.58
  -3  13 -12   49.23    5.54
  -3   0 -13   -0.14    5.00
  -2   4 -13  249.10    6.31
  -2   8 -13   14.55    4.83
  -4  14 -13   18.89    5.17
 -10  -8 -14   43.33    5.84
  -4  13 -14    5.93    5.22
  -6  16 -14  -11.68    6.51
  -3   4 -15   21.30    4.92
  -3   8 -15   11.68    4.60
 -14  -9 -16    2.46    6.67
 -12  -8 -16    3.21    6.06
  -4  10 -16    6.28    5.40
  -4   6 -17  137.57    5.22
  -5  11 -17   17.54    5.16
  -6  13 -17    9.93    5.86
  -5   3 -18  145.16    5.62
  -7  12 -19    1.48    5.56
  -7   2 -20   -1.78    5.41
  -7  10 -20   -4.54    5.78
  -9   0 -21    0.03    6.17
  -8   2 -21   19.05    5.34
  -8  10 -21   24.10    6.04
 -10   4 -23   66.18    7.17
  -9  -3  27   -0.20    4.40
  -8  -1  27    3.06    4.48
  -9  -4  26   12.43    4.58
  -9  -5  25   49.17    4.71
  -6   1  25   44.13    4.45
 -12  -9  24   25.21    4.85
 -11  -8  24    4.11    4.34
 -10  -7  24   14.36    4.39
 -12 -10  22   37.65    4.25
  -8  -6  22   -3.18    3.87
  -6  -3  22    8.76    4.20
 -12 -11  20   20.22    4.29
  -7  -6  20   41.89    4.30
  -5  15  20    0.13    4.82
 -13 -12  19    5.18    4.19
 -11 -11  18    1.84    4.38
  -3   0  18   14.86    3.76
 -12 -12  17    0.20    4.26
  -5  -5  17   75.47    4.00
  -3  -1  17   37.06    3.93
  -9 -10  16    6.67    3.91
  -7  -8  16   38.90    3.52
  -3  14  16    8.49    4.77
  -5  -6  15   98.15    4.11
  -4  -5  14    9.82    3.71
 -14 -14  13    7.26    4.06
 -12 -13  13    5.79    4.39
  -9 -11  13   -7.01    4.12
  -8 -10  13   89.61    4.55
  -6  -8  13  240.01    4.70
  -4  18  12    2.87    4.83
 -10 -12  11    0.74    3.95
 -15 -15  10   86.19    4.88
 -13 -14  10   -0.65    4.31
  -3  -5  10    5.86    3.71
  -1  13  10   29.33    4.33
  -3  17  10   10.22    4.44
 -15 -15   9    9.08    4.73
 -11 -13   9   46.50    4.00
  -7 -10   9   16.13    3.47
  -6  -9   9  328.02    5.07
  -5  -8   9   -0.70    3.67
 -15 -15   8    3.06    4.65
 -11 -13   8  167.59    4.56
  -8 -11   8   17.30    3.48
  -2  16   8   16.05    3.84
  -4  19   8   47.93    4.94
  -8 -11   7   22.43    3.42
  -4  -7   7    0.88    3.66
  -2  -4   7   35.94    3.48
   0  11   7   50.19    3.91
  -1  14   7  393.67    5.95
  -9 -12   6   36.46    4.24
  -3  18   6    1.53    4.27
  -9 -12   5  160.44    4.79
  -3  -6   5   87.81    3.72
   0  12   5    2.04    3.49
  -3  18   5   33.70    4.39
  -9 -12   4    5.67    4.13
  -3  -6   4   44.61    3.43
   0  12   4   12.10    3.51
 -15 -15   3   67.70    5.10
  -9 -12   3   64.31    4.46
  -3  -6   3  195.23    4.62
 -15 -15   2   -5.89    4.93
  -9 -12   2    4.35    4.12
  -3  -6   2   42.43    3.51
 -15 -15   1   28.93    4.89
  -3  -6   1   50.53    3.61
   1   6   1   16.88    3.21
 -13 -14   0    9.35    4.33
 -11 -13   0  119.47    4.47
  -8 -11   0  235.70    4.68
  -3  -6   0   44.51    3.48
   0  12   0  182.58    4.38
  -3  18   0   89.95    4.59
  -8 -11  -1   -3.45    3.45
   0  12  -1  365.11    5.14
  -3  18  -1    6.62    4.21
  -7 -10  -2  284.58    5.06
  -4  -7  -2    8.40    3.77
  -4  19  -2   11.77    4.08
 -14 -14  -3   -0.87    4.17
 -10 -12  -3   26.10    4.23
  -1  14  -3  158.36    4.67
  -2  16  -3  133.24    4.41
  -4  19  -3   59.36    4.32
   0  11  -4  137.64    4.20
  -1  14  -4   30.96    4.23
   0  10  -5   88.28    3.94
  -3  17  -5   24.22    4.45
  -4  -6  -6   47.51    4.19
  -1  13  -6   38.91    3.48
  -2  15  -6   41.77    3.99
  -4  18  -6   38.13    4.23
 -14 -13  -7   -0.72    4.17
 -10 -11  -7   58.23    4.48
   0   4  -7  122.50    4.28
   0   8  -7   41.39    3.89
  -5  19  -7    0.83    4.44
  -9 -10  -8   57.31    4.56
  -2  14  -8   63.37    4.21
  -3  16  -8   21.50    3.69
  -4  17  -9   28.01    4.29
 -14 -12 -10    4.78    4.14
  -1   9 -10   43.25    3.69
 -15 -12 -11   13.18    4.51
  -1   6 -11  251.25    5.00
  -1   7 -11  108.88    4.17
  -2  12 -11   38.31    4.19
  -3  14 -11   16.70    3.87
  -5  17 -11   -1.34    3.93
  -4  15 -12   16.11    4.35
  -8  -7 -13    5.38    3.29
  -2   9 -13    7.39    3.33
  -3  12 -13   36.95    4.05
  -5  16 -13   -0.87    4.02
  -6  17 -13    8.11    4.39
  -3  11 -14   10.73    3.93
  -5  15 -14    7.95    4.11
  -3   9 -15   75.58    4.37
  -4  12 -15   -0.82    3.74
  -5  14 -15   54.52    4.35
  -5  13 -16  151.98    4.86
  -4   5 -17   23.86    3.42
  -4   7 -17   10.77    4.04
  -4   8 -17    7.90    3.96
  -5   9 -18   26.50    3.82
  -6  12 -18   16.84    4.25
  -7  14 -18   13.16    4.39
  -6  10 -19   -2.49    4.33
  -5   9  24   13.63    9.09
 -12  -2 -22   67.52   10.39
  -6  -5 -13    0.42    5.95
 -11  -1 -22    4.23    7.02
 -11   1 -23   34.53    8.32
 -10  -2  29   38.46    6.97
  -9   0  29    5.49    5.75
  -8   4  29   -0.81    6.91
  -8   1  28   18.11    6.29
  -7   2  27   96.31    6.91
  -7   0  26   46.68    6.33
  -6   4  26   12.79    6.57
 -10  -6  25    0.23    6.14
  -5   3  24   36.48    6.10
 -13 -10  23   26.50    6.71
  -5   1  23   40.45    6.14
 -11  -9  22   -2.54    6.00
  -9  -7  22    2.45    5.41
  -4   3  22   -0.28    5.85
  -5  13  22    5.97    5.94
 -13 -11  21    3.19    6.72
  -4   1  21  205.66    6.73
 -11 -10  20   -5.11    6.28
  -4  13  20   55.97    6.62
  -3  11  19   58.73    6.07
  -4  14  19   18.39    6.26
 -10 -10  18   30.75    5.49
  -7  -7  18   -3.70    5.85
 -14 -13  17   16.23    6.76
  -2  10  17    7.72    5.86
  -8  -9  16   23.12    5.82
 -13 -13  15    6.41    5.85
 -10 -11  15   51.50    5.63
  -2   0  15    2.03    5.18
  -3  15  15    4.66    6.43
 -11 -12  14    4.58    5.31
  -7  -9  13   13.17    4.83
  -1  11  13   71.90    5.29
  -2  14  13   22.58    5.70
  -3  16  13   31.47    6.31
 -12 -13  12   17.33    6.11
  -9 -11  12  241.37    6.47
  -5  -7  12   81.33    5.47
  -4  -6  11   52.67    5.44
  -1   0  11    0.25    4.23
   0   6  11   56.49    6.04
   0   7  11   23.72    5.35
  -2  15  11   69.85    5.92
  -3  17  11    7.06    6.12
  -2  -3  10  188.33    5.84
   0   9  10    3.81    5.06
 -13 -14   9    6.48    6.13
   0  10   9   22.27    5.07
  -4  19   9   -1.26    6.72
 -13 -14   8   -0.64    6.07
  -7 -10   8   14.95    4.86
  -5  -8   8  480.20    6.87
   0  11   8  146.42    5.72
  -1  14   8  430.41    7.43
 -15 -15   7   12.20    6.81
 -11 -13   7    9.57    5.48
  -3  18   7   14.03    6.06
 -15 -15   6   18.25    6.68
  -8 -11   6   48.27    4.96
 -15 -15   5   32.61    6.84
 -15 -15   4   24.60    6.72
  -1  15   4    8.21    5.67
   1   6   3   -0.53    4.24
   1   7   3  171.50    5.52
  -1  15   3   11.41    5.64
  -2  17   3    1.61    5.28
 -11 -13   2    2.06    5.53
   1   6   2    3.87    4.30
   1   7   2  179.42    5.52
  -1  15   2   21.85    5.63
  -2  17   2   36.22    5.38
 -13 -14   1    1.42    6.26
 -11 -13   1    0.32    5.52
  -8 -11   1   71.30    5.13
   1   7   1   61.22    4.72
  -1  15   1   50.12    5.73
   1   6   0   15.75    4.38
   1   7   0  512.68    7.16
  -1  15   0    1.82    5.59
  -7 -10  -1   26.25    5.11
 -14 -14  -2   55.45    6.31
 -10 -12  -2   75.12    5.98
  -6  -9  -2   50.05    5.23
  -5  -8  -2  685.31    8.08
   0  12  -2  189.41    5.58
  -3  18  -2   10.84    5.98
 -12 -13  -3  149.29    5.99
 -15 -14  -4    8.66    6.68
  -9 -11  -4    1.74    5.37
  -2  16  -4    5.45    5.40
  -4  19  -4   21.39    5.68
 -13 -13  -5  109.49    6.70
 -11 -12  -5   17.41    5.65
  -7  -9  -6    1.85    4.94
   0  10  -6    2.98    4.91
  -3  17  -6   45.24    6.21
 -12 -12  -7   35.74    5.49
  -2  15  -7  -10.28    5.48
  -4  18  -7   -2.83    5.75
 -15 -13  -8   42.91    6.87
  -1  12  -8   -0.56    4.69
  -7  -8  -9    8.98    4.91
  -5  -6  -9  555.58    9.04
  -1  11  -9   18.85    4.68
 -12 -11 -10   31.01    5.94
  -1  10 -10    9.54    4.77
  -2  13 -10   40.75    5.69
  -3  15 -10   68.07    5.43
  -5  18 -10   17.38    6.47
 -11 -10 -11  328.65    7.27
  -8  -8 -11   42.30    5.07
  -5  -5 -11    1.73    5.00
  -1   5 -11    2.93    5.06
  -1   8 -11  119.62    5.37
  -4  16 -11   12.18    5.88
 -14 -11 -12   19.20    5.88
 -10  -9 -12  103.36    6.24
  -2  11 -12   55.81    4.71
  -7  -6 -13    1.73    4.76
 -14 -10 -14    1.72    5.56
 -13  -9 -15    4.13    5.98
 -11  -8 -15   27.36    5.46
  -4   0 -15   -0.28    4.88
  -3   3 -15   93.38    5.49
  -6  16 -15   -2.96    6.36
  -4  11 -16   -6.24    5.34
  -6  15 -16   22.73    6.56
  -4   4 -17  115.32    5.34
  -5  12 -17   16.59    6.04
 -13  -7 -18    8.72    5.93
  -6   0 -18  441.28    9.31
  -5  10 -18   25.18    5.21
  -6   2 -19   74.04    6.14
  -6   6 -20   29.15    5.42
  -7  11 -20    0.66    5.68
  -7   5 -21    3.42    5.10
  -7   6 -21    3.06    6.11
  -7   7 -21    6.61    5.97
  -8  11 -21   -4.27    6.33
  -9   2 -22   32.95    6.35
  -8   6 -22   -2.71    5.82
  -8   7 -22    3.43    5.76
 -10   3 -23   18.44    5.74
 -10  -3  28   60.80    4.63
 -10  -5  26   24.87    4.33
  -8  -2  26   45.90    4.85
 -12  -8  25   13.92    4.89
 -11  -7  25    7.31    4.29
  -8  -5  23  120.86    4.53
 -10  -8  22   27.60    4.65
  -7  -5  21   15.70    4.10
 -10  -9  20    8.07    3.79
  -9  -8  20   19.35    4.03
  -8  -7  20   34.56    4.17
 -12 -11  19   35.73    4.50
  -6  -5  19   76.14    3.84
 -13 -12  18    0.45    4.14
  -9  -9  18    1.85    3.93
  -8  -8  18  220.13    5.06
  -5  -4  18   36.00    3.65
  -4  15  18    7.27    4.28
 -11 -11  17    4.54    3.63
  -4  -3  17    0.78    3.52
 -12 -12  16    1.21    4.37
  -9 -10  15  138.31    4.57
  -6  -7  15   19.37    3.56
  -4  17  15   56.83    5.24
 -15 -14  14    9.67    4.53
 -13 -13  14   41.89    4.36
  -3  -3  14  526.55    6.98
 -11 -12  13   -4.98    3.83
  -4  18  13    1.64    4.83
 -14 -14  12   30.87    4.17
  -8 -10  12    2.23    3.34
  -6  -8  12    2.19    3.50
  -3  -4  12   29.65    3.89
  -2  -2  12   24.28    4.02
  -1  12  12   90.80    4.74
 -14 -14  11   70.78    4.49
 -12 -13  11   11.52    4.33
  -9 -11  11    4.68    4.15
 -10 -12  10   40.80    4.10
  -4  19  10   20.93    4.65
 -10 -12   9   28.05    4.14
  -3  -5   9   52.94    3.46
  -1  14   9   36.12    4.38
  -2  16   9   11.73    3.74
  -6  -9   8    6.78    3.60
  -3  18   8   -0.57    4.12
 -13 -14   7   11.76    4.46
  -7 -10   7  253.66    4.72
  -6  -9   7  337.01    5.12
  -5  -8   7   50.21    3.91
 -13 -14   6   21.78    4.45
 -11 -13   6  115.33    4.40
  -7 -10   6    9.70    3.47
  -4  -7   6  456.82    6.10
  -2  -4   6  127.17    4.45
   0  12   6  200.02    4.60
  -1  15   6   20.93    4.11
  -2  17   6   64.96    4.12
 -13 -14   5    7.41    4.42
 -11 -13   5   32.18    3.99
  -8 -11   5   95.06    3.86
  -4  -7   5   11.85    3.83
  -1  15   5    8.05    4.02
  -2  17   5    6.50    3.72
 -13 -14   4   -3.18    4.44
 -11 -13   4    5.35    3.88
  -8 -11   4   22.57    3.50
   1   6   4   29.84    3.36
   1   7   4   76.81    3.90
  -2  17   4  144.30    4.48
 -13 -14   3    7.32    4.35
 -11 -13   3   34.42    4.12
  -8 -11   3  101.83    3.93
   0   0   3    0.88    3.50
   1   5   3   58.61    4.17
   1   8   3   37.46    3.93
   0  13   3    0.34    3.36
  -4  20   3   78.07    4.90
 -13 -14   2   18.89    4.32
  -8 -11   2  281.52    4.76
   1   5   2  521.17    7.91
   1   8   2   19.44    3.81
   0  13   2   -1.46    3.37
  -4  20   2   16.19    4.67
   1   5   1  239.20    5.85
   1   8   1   48.17    4.01
   0  13   1   -0.36    3.31
  -2  17   1   74.97    4.07
  -4  20   1   19.52    4.72
  -7 -10   0   30.49    3.70
  -4  -7   0  158.70    4.27
   1   5   0  709.33    8.70
   1   8   0    6.25    2.97
   0  13   0   -2.29    3.29
  -2  17   0   -6.46    3.81
  -4  20   0   33.79    4.70
 -14 -14  -1   -0.35    4.34
 -10 -12  -1    4.93    4.07
  -6  -9  -1   87.66    4.07
  -4  -7  -1  248.31    4.97
   1   6  -1    9.15    3.10
   1   7  -1  252.94    5.00
   1   8  -1   12.41    2.98
  -1  15  -1   32.07    4.06
  -2  17  -1   87.06    4.14
 -12 -13  -2    5.67    3.91
  -2  -4  -2   58.58    4.21
  -1  15  -2   26.23    4.03
  -2  17  -2   56.64    3.99
   0  12  -3   98.96    3.93
  -3  18  -3   30.33    4.30
   0  12  -4   12.50    3.47
  -3  18  -4   42.95    4.33
  -8 -10  -5   67.51    3.89
   0  11  -5  380.29    5.15
  -1  14  -5  192.40    4.67
  -2  16  -5  118.83    4.23
  -4  19  -5   34.80    4.01
  -5  -7  -6   95.39    4.51
   0   9  -7 1047.35    7.47
  -1  13  -7   11.50    3.25
  -3  17  -7   15.37    4.22
   0   5  -8   42.85    3.35
   0   6  -8    8.87    3.63
   0   7  -8   48.99    3.87
   0   8  -8 1526.59    9.03
  -2  15  -8    8.83    3.81
  -4  18  -8    2.30    3.96
  -6  -7  -9   55.04    4.06
  -2  14  -9  134.45    4.41
  -3  16  -9    4.91    3.60
  -4  17 -10   -1.54    4.00
 -13 -11 -11    3.06    4.24
  -1   4 -11    3.62    3.52
  -1   9 -11    4.46    3.46
  -3  15 -11   34.87    3.86
  -3  14 -12  223.83    4.72
  -5  17 -12    4.16    3.86
  -2   3 -13   27.23    3.80
  -2  10 -13    1.99    3.25
  -3  13 -13   40.26    3.96
  -4  15 -13   61.08    4.49
  -3   1 -14   12.07    3.68
  -2   6 -14    4.44    3.47
  -2   7 -14    1.11    3.41
  -3  12 -14   15.24    3.83
  -4  14 -14   -3.18    4.38
  -3  10 -15    2.23    3.96
  -4  13 -15   29.43    3.66
  -5  15 -15   14.21    4.07
  -5  14 -16    1.44    4.21
  -4   9 -17   19.25    3.97
  -6  14 -17   20.14    4.04
  -6  13 -18   -2.38    4.03
  -6  11 -19   10.85    4.34
  -7  13 -19   39.77    4.73
  -6   5 -20    8.75    3.86
  -6   7 -20   -1.21    3.68
  -6   8 -20    0.72    3.54
  -7   8 -21   22.47    4.33
  -8   5 -22   -0.58    4.22
  -8   8 -22   12.40    4.18
  -1   3  14 1109.50   26.56
 -10  -5 -18    1.16    8.30
  -9  -5 -17    2.78    7.81
  -3   9  20    4.46    7.01
 -10   0 -22    4.30    7.19
  -9  -1  28    9.50    6.03
 -10  -4  27    0.22    5.96
 -12  -7  26    1.37    6.69
 -11  -6  26   -5.40    5.96
  -8  -3  25   33.15    5.61
  -7  -1  25   23.17    5.58
  -8  -4  24   42.89    5.64
  -6   0  24   19.76    5.74
 -12  -9  23    6.42    5.84
  -9  -6  23   41.93    5.52
 -12 -10  21   14.83    6.00
 -13 -11  20    2.06    5.79
  -4   0  20  144.28    6.06
 -14 -12  19    2.75    6.60
 -11 -10  19    8.80    6.31
  -4  -2  18    4.88    5.04
 -10 -10  17   -5.61    5.36
  -6  -6  17   74.84    5.16
  -4  16  17   17.88    5.93
 -14 -13  16    5.12    5.81
  -8  -9  15   26.69    5.93
  -7  -8  15    2.66    4.78
  -1   7  15  163.86    7.25
 -10 -11  14    0.22    5.50
  -5  -6  14   67.37    5.26
  -1  10  14    1.81    4.82
  -3  16  14   20.17    6.08
  -4  -5  13   96.20    5.57
  -7  -9  12   15.91    4.87
  -2  15  12   93.12    5.86
  -3  17  12   -7.84    6.10
   0   8  11    6.65    5.17
  -1  13  11   12.18    5.89
 -14 -14  10   29.61    5.87
 -12 -13  10   42.88    5.37
   0  10  10   -3.72    4.96
  -2  16  10    4.65    5.34
  -1  -1   9   30.16    4.76
  -3  18   9   10.38    5.93
 -10 -12   8   33.60    5.76
   0  12   7   -4.42    4.86
  -6  -9   6   33.46    5.19
  -5  -8   6  323.65    6.42
  -1  -2   6 1180.33   13.07
  -7 -10   5  215.43    5.76
  -4  -7   4  281.74    6.60
   1   8   4  615.90    8.24
   0  13   4    5.99    4.72
  -7 -10   2   42.58    5.20
  -7 -10   1    9.07    4.99
  -4  -7   1   12.33    4.18
   1   9   1   11.81    5.13
 -14 -14   0   39.00    6.26
 -12 -13  -1   88.89    5.66
  -5  -8  -1   49.59    5.36
   1   5  -1  925.06   10.08
   0  13  -1    3.10    4.67
   1   6  -2   21.92    4.37
   1   7  -2   69.52    4.61
 -15 -14  -3   20.42    5.86
  -9 -11  -3   52.97    4.94
  -1  15  -3   24.70    5.62
 -13 -13  -4   59.08    6.52
 -11 -12  -4  119.99    6.18
 -14 -13  -6   17.48    6.08
 -10 -11  -6    1.13    5.73
  -6  -8  -6  452.62    7.34
   0  11  -6  442.26    6.43
  -1  14  -6   66.59    5.88
  -2  16  -6    4.49    5.22
  -4  19  -6   13.24    6.50
 -15 -13  -7   -6.48    6.84
   0  10  -7   43.17    5.02
 -13 -12  -8   -2.45    6.24
 -11 -11  -8   12.47    5.50
  -8  -9  -8  135.19    5.64
 -14 -12  -9    4.30    5.89
  -1  12  -9   63.88    4.80
 -15 -12 -10   14.56    6.77
  -9  -9 -10    2.73    5.74
  -1  11 -10   22.84    4.67
  -7  -7 -11   -0.53    4.80
  -6  -6 -11   19.39    5.12
  -2  13 -11   45.31    5.56
  -5  18 -11    5.85    6.24
 -12 -10 -12    4.46    6.31
  -2  12 -12   12.78    5.50
  -4  16 -12   48.20    5.93
 -13 -10 -13   88.94    6.51
 -11  -9 -13    3.22    5.35
 -12  -9 -14   12.17    6.27
  -2   8 -14  489.79    6.57
  -5  16 -14   18.79    5.61
  -3   6 -16   46.89    4.93
  -3   7 -16   92.61    5.01
  -4  12 -16  147.79    5.63
  -4   3 -17    1.30    4.68
  -4  10 -17    3.16    5.29
  -5   2 -18   21.49    4.81
  -5  11 -18    0.91    6.18
  -5   5 -19    0.42    5.50
  -5   6 -19    7.67    5.39
  -5   7 -19  259.72    6.51
  -5   8 -19    5.37    5.25
  -6   4 -20    0.90    5.33
  -6   9 -20    8.27    6.02
  -7  12 -20    5.96    6.46
  -7   4 -21   56.16    5.54
  -7   9 -21   27.24    5.79
  -8   4 -22   44.74    6.32
  -8   9 -22   -3.10    6.55
 -10   2 -23    1.68    5.65
  -9   5 -23    7.41    5.55
  -9   6 -23   11.29    6.64
  -9   7 -23    2.10    6.48
 -11  -4  28    2.53    4.85
 -12  -6  27    6.37    4.68
 -11  -5  27   12.13    4.07
 -13  -9  24   11.62    4.64
  -9  -5  24    4.40    3.87
  -7  -2  24   40.17    4.30
 -11  -8  23   14.40    4.45
 -10  -7  23   45.36    4.69
  -7  -3  23   -0.87    3.90
 -13 -10  22   15.18    3.99
  -7  -4  22   92.16    4.64
  -5   0  22  705.03    8.61
 -14 -11  21   33.16    4.88
 -11  -9  21   41.66    4.68
 -10  -8  21    6.72    3.82
  -8  -6  21    2.37    3.97
  -6  -4  20   71.24    3.86
 -10  -9  19    4.83    3.74
  -7  -6  19   48.82    4.48
  -5  -3  19   49.05    3.84
  -4  -1  19   53.36    4.08
 -12 -11  18   61.61    4.50
 -13 -12  17    4.90    4.24
  -9  -9  17   15.77    4.02
  -8  -8  17    7.59    4.02
  -7  -7  17  156.41    4.20
  -3  14  17    6.87    4.44
 -11 -11  16    4.52    3.81
  -5  -5  16   62.78    3.95
  -2  12  16    0.58    3.99
 -14 -13  15    9.12    4.02
 -12 -12  15   -1.85    4.37
  -4  -4  15   51.39    3.99
  -2  13  15    3.90    4.07
  -9 -10  14   58.41    4.32
  -2  14  14  105.10    4.62
  -4  18  14   27.27    4.68
 -13 -13  13   32.27    4.55
 -10 -11  13   18.26    4.00
 -15 -14  12   20.02    4.80
 -11 -12  12   -0.99    3.83
  -8 -10  11   53.12    3.58
  -7  -9  11   15.42    3.45
  -6  -8  11   93.33    4.00
  -5  -7  11   22.97    3.65
  -9 -11  10   91.64    4.46
  -4  -6  10    1.53    3.63
  -1  14  10  163.27    4.97
  -3  18  10   -3.64    4.19
 -14 -14   9   45.18    4.46
 -12 -13   9   75.91    4.03
  -9 -11   9    8.44    4.10
   0  11   9   18.10    3.59
 -14 -14   8   -2.18    4.15
 -12 -13   8  155.28    4.49
  -3  -5   8  222.21    4.81
 -10 -12   7   89.66    4.37
  -1  15   7   -0.35    3.99
  -2  17   7    5.30    4.52
 -10 -12   6    1.18    4.03
  -3  19   6   41.34    4.32
  -6  -9   5  128.58    4.27
  -5  -8   5  121.21    4.45
  -2  -4   5  262.01    5.67
   1   6   5   33.07    3.50
   1   7   5   58.44    3.66
   0  13   5    3.54    3.34
  -3  19   5   20.83    4.16
  -7 -10   4   80.30    3.87
  -6  -9   4   58.97    3.97
  -5  -8   4  548.04    6.34
   1   5   4   10.32    3.19
  -3  19   4   47.73    4.38
  -7 -10   3   36.39    3.69
  -6  -9   3  136.11    4.34
  -5  -8   3  189.53    4.71
  -4  -7   3  162.91    4.23
   1   9   3   21.91    3.80
  -1  16   3   60.82    4.17
  -3  19   3   38.50    4.43
 -14 -14   2    8.48    4.23
 -10 -12   2    8.65    4.16
  -6  -9   2   74.88    4.03
  -5  -8   2   98.75    4.18
  -4  -7   2    1.95    2.98
   1   9   2   11.99    3.66
  -1  16   2   18.15    3.91
  -3  19   2   46.58    4.21
 -14 -14   1   -3.29    4.38
 -10 -12   1   -1.87    4.04
  -6  -9   1   11.25    3.61
  -5  -8   1   21.88    3.77
   1   4   1   17.48    3.48
  -1  16   1    2.95    3.84
  -3  19   1   49.50    4.24
 -12 -13   0   44.69    3.99
 -10 -12   0    3.34    4.03
  -6  -9   0    4.98    3.55
  -5  -8   0   92.70    4.26
   1   4   0   68.19    4.26
   1   9   0   57.03    4.01
  -1  16   0    2.68    3.83
  -3  19   0    4.03    4.03
   1   9  -1   31.97    3.72
  -3  19  -1   70.12    4.36
 -15 -14  -2    9.36    4.08
  -9 -11  -2    4.18    3.32
   1   5  -2  537.91    7.40
   1   8  -2    7.83    3.63
   0  13  -2    0.02    3.31
  -3  19  -2   -4.28    4.05
   1   6  -3  241.91    4.99
   1   7  -3   91.16    3.70
   0  13  -3    3.56    3.30
  -2  17  -3   12.96    3.67
  -8 -10  -4  102.47    4.09
  -3  -5  -4    9.92    3.13
   0   1  -4   56.01    4.87
  -1  15  -4   -1.74    3.88
  -2  17  -4  143.67    4.35
  -7  -9  -5  184.24    4.82
  -4  -6  -5   98.83    4.67
   0  12  -5    2.53    3.37
  -3  18  -5   67.01    4.47
 -12 -12  -6   35.53    4.00
  -3  18  -6   51.10    4.38
  -9 -10  -7  213.98    4.75
   0   3  -7  116.77    4.54
  -1  14  -7   96.45    4.35
  -2  16  -7    7.15    3.62
  -4  19  -7    7.41    4.62
   0   9  -8   14.50    3.66
  -1  13  -8  113.07    4.57
  -3  17  -8    9.67    4.24
 -10 -10  -9   -1.38    4.07
  -2  15  -9   66.83    4.05
  -4  18  -9    8.79    3.97
  -1   2 -10   71.41    3.97
  -2  14 -10   23.74    3.88
  -3  16 -10   49.18    4.40
  -1  10 -11   17.66    3.43
  -4  17 -11   63.86    4.33
  -1   6 -12  123.52    4.28
  -1   7 -12    2.52    3.49
  -2  11 -13  104.84    4.42
  -3  14 -13    9.44    3.60
  -5  17 -13   27.35    4.72
  -2   5 -14   56.84    3.81
  -2   9 -14    6.49    3.30
  -3  11 -15  192.75    4.71
  -4   1 -16   99.31    4.63
  -3   5 -16  150.60    4.40
  -3   8 -16   81.87    3.69
  -3   9 -16   -2.14    4.01
  -4  11 -17   97.06    4.16
  -5  13 -17   92.80    4.58
  -6  15 -17   -7.32    4.44
  -5   9 -19   24.51    3.78
  -6  12 -19   47.80    4.29
  -6  10 -20   66.48    4.39
  -7  10 -21   13.39    4.14
  -8  10 -22    9.11    4.36
  -5  -2 -15   32.32    8.44
  -3   4  20   93.30    8.60
  -1   6  15  472.88   13.07
  -8   5  29   -0.09    8.35
  -6   5  26   10.15    7.83
  -5  12  23   82.55    8.13
  -4  10  22    1.49    7.94
  -2   7  18    4.94    5.99
  -2   3  17    1.71    6.17
   0   5  11  183.59    9.10
  -9  -7 -14    7.18    7.09
  -5  -1 -16  162.65    8.19
 -14  -8 -17   -0.90    8.01
 -12  -7 -17  165.70    8.88
 -13  -6 -19   65.88    8.87
  -9   1  29   30.40    6.50
  -8   2  28   19.08    6.32
  -9  -2  27   64.82    6.52
  -8   0  27    0.78    6.24
  -7   3  27    8.95    6.27
  -9  -4  25   57.17    6.74
  -6   2  25   11.63    5.58
 -12  -8  24   13.25    5.79
  -6  -1  23  238.45    7.09
  -9  -7  21  156.51    6.10
  -6  -3  21   66.33    6.23
  -5  -1  21   14.83    4.81
  -4  12  21    4.54    6.18
 -12 -10  20   70.47    6.38
  -5  -2  20    3.29    4.86
  -9  -8  19    1.01    5.56
  -8  -7  19  134.31    6.20
  -3   2  19    2.77    4.97
 -14 -12  18  137.53    6.75
  -3  13  18   25.63    6.66
  -2  11  17   -3.58    5.77
  -3  15  16   73.88    6.62
  -4  17  16   -3.11    6.88
  -3  -2  15   29.08    5.37
  -1   8  15   13.64    5.09
 -12 -12  14   52.14    5.89
  -8  -9  14  107.12    5.12
  -6  -7  14   90.62    5.31
  -1  12  13  104.56    6.37
  -2  15  13    7.41    5.43
  -3  17  13    4.79    5.98
 -13 -13  12   13.52    6.13
  -1   1  12   83.90    6.33
 -11 -12  11    3.08    5.48
  -3  -4  11  256.53    6.55
   0   9  11    2.51    4.99
  -2  16  11   19.38    6.45
  -8 -10  10   21.05    4.81
  -2  -3   9 1022.20   10.19
   0  12   8   96.06    5.41
  -1  15   8  151.52    6.18
  -2  17   8    9.60    6.25
 -14 -14   7    9.16    5.93
 -12 -13   7  118.96    5.78
  -3  19   7    5.32    5.68
 -14 -14   6   -3.50    5.94
   0  13   6   41.33    4.95
 -14 -14   5   51.82    6.06
 -10 -12   5    7.76    5.79
   1   8   5   96.38    5.93
 -14 -14   4    1.22    5.96
 -10 -12   4    1.51    5.77
   1   9   4    1.82    5.16
  -1  16   4   12.67    5.48
 -14 -14   3   27.86    6.11
 -10 -12   3    2.29    5.78
  -2  18   3    9.96    6.08
   1   4   2    2.49    4.49
   1  10   2   -3.20    5.01
  -2  18   2  105.77    6.39
 -12 -13   1   -0.14    5.46
   1  10   1    3.27    5.04
  -2  18   1   -5.65    6.14
   1  10   0    2.39    4.93
 -15 -14  -1   -0.37    5.82
  -2  -4  -1   39.68    5.00
  -1  16  -1    1.49    5.44
   1   9  -2  108.22    5.52
 -13 -13  -3  187.98    7.10
 -11 -12  -3    0.53    5.69
   1   8  -3    6.96    5.17
  -3  19  -3   25.30    5.65
   0  13  -4   11.66    4.60
 -14 -13  -5  -16.91    6.17
 -10 -11  -5   -0.47    5.72
  -1  15  -5   20.41    5.55
  -2  17  -5   39.02    5.75
   0   2  -6  384.51    8.41
   0  12  -6  187.44    5.46
  -3  -4  -7   18.88    4.57
   0  11  -7   47.81    5.00
  -4  -5  -8   92.02    6.15
   0   4  -8  469.68    7.27
   0  10  -8   75.60    5.10
 -12 -11  -9    1.16    5.31
  -1   1  -9  404.90    8.71
   0   6  -9  226.08    6.04
   0   7  -9    6.73    4.96
   0   8  -9   14.56    5.04
  -1  13  -9   -0.35    5.72
  -3  17  -9    5.02    5.88
  -1  12 -10    6.11    4.49
  -2   0 -11   -0.08    4.01
  -1   3 -11   13.69    5.14
 -15 -11 -12  -10.59    6.75
  -9  -8 -12   -4.44    5.72
  -2   1 -12   53.16    5.58
  -1   8 -12    3.88    4.76
  -3  15 -12   14.06    5.65
  -4  16 -13   28.95    5.80
  -2   4 -14  134.76    5.68
  -2  10 -14   27.20    4.61
  -3  13 -14   29.97    5.43
  -4  15 -14   38.29    6.04
 -10  -7 -15  115.42    6.56
  -3   2 -15   17.68    5.02
  -4  14 -15   86.44    6.31
  -3   4 -16    3.19    4.74
  -4  13 -16   -3.56    6.11
  -5  15 -16    9.22    5.55
  -4   6 -18   89.92    5.96
  -4   7 -18   14.17    5.52
  -4   8 -18  221.32    6.20
  -5  12 -18   22.48    5.85
  -6  14 -18   44.30    6.59
  -6   1 -19    3.75    5.62
  -5   4 -19   16.44    5.62
  -5  10 -19   17.56    5.68
  -7   1 -20   28.17    5.63
  -8   1 -21   24.50    5.43
  -7   3 -21   16.76    5.36
  -7  11 -21   12.32    6.41
  -8   3 -22   82.46    6.62
  -9   4 -23   50.25    6.09
 -10  -1  29    1.53    4.76
  -9  -3  26   19.74    4.61
  -7   1  26   14.09    4.55
 -13  -8  25   -7.20    4.62
 -11  -7  24   33.68    4.32
 -10  -6  24    0.78    4.50
 -12  -9  22   36.21    4.32
  -8  -5  22   32.77    4.13
  -6  -2  22    7.34    4.19
  -7  -5  20   -0.92    4.10
 -13 -11  19   10.79    4.23
 -11 -10  18   -3.32    3.74
  -6  -5  18   21.73    3.59
 -12 -11  17    5.87    4.39
 -15 -13  16   59.20    4.94
 -13 -12  16   -2.86    4.29
 -10 -10  16   11.72    3.93
  -6  -6  16  178.81    4.54
 -11 -11  15    5.01    3.76
  -3  16  15   -2.78    4.32
 -14 -13  14    6.06    4.07
  -7  -8  14  166.71    4.33
  -1  11  14    0.58    4.20
 -12 -12  13   12.24    3.80
  -9 -10  13  450.66    5.80
  -5  -6  13  269.56    5.07
  -3  -3  13  118.84    4.60
  -2  -1  13   17.62    3.95
 -10 -11  12   31.19    4.15
  -4  -5  12  224.16    5.03
  -1  13  12   31.27    4.24
 -13 -13  11   27.69    4.53
  -3  18  11    7.45    4.14
 -15 -14  10   17.20    4.14
 -11 -12  10   48.82    4.04
  -7  -9  10   17.55    3.54
  -6  -8  10   34.15    3.75
  -5  -7  10    3.15    3.59
   0  11  10   16.88    3.62
  -8 -10   9   82.47    3.86
  -4  -6   9  181.98    4.71
  -1  15   9   -0.62    3.90
  -2  17   9   15.22    4.59
  -9 -11   8    1.94    3.26
  -3  19   8    3.44    4.91
  -9 -11   7   -5.44    3.34
  -3  -5   7    2.98    2.99
   0  13   7   75.70    3.91
 -12 -13   6  251.55    4.94
   1   7   6    8.75    3.78
  -1  16   6    7.37    3.89
 -12 -13   5   56.30    4.05
  -1  -2   5  686.79   10.29
   1   5   5   -0.43    3.05
   1   9   5  206.80    5.09
  -1  16   5   98.21    4.43
  -2  18   5   34.73    4.49
 -12 -13   4   72.85    4.14
  -2  -4   4   52.77    3.81
   1  10   4   31.38    3.76
   0  14   4   65.30    4.41
  -2  18   4    1.08    4.36
 -12 -13   3   42.93    4.07
  -2  -4   3    3.79    3.27
   1   4   3    1.54    3.16
   1  10   3   14.58    3.70
   0  14   3   14.96    3.39
 -12 -13   2   20.18    3.96
   0  14   2   87.13    3.70
   0  14   1   45.69    3.54
 -15 -14   0   12.03    4.21
  -9 -11   0    2.34    3.29
  -2  -4   0   76.67    4.38
   0  14   0  118.00    3.83
  -2  18   0  111.36    4.70
  -9 -11  -1    6.58    3.41
   1   4  -1  211.14    5.73
   1  10  -1    3.04    3.58
   0  14  -1   50.00    3.50
  -2  18  -1    0.79    4.31
 -13 -13  -2   73.42    4.84
 -11 -12  -2  184.93    4.85
   1  10  -2   12.80    3.55
   0  14  -2   75.45    3.74
  -1  16  -2    7.01    3.90
  -2  18  -2   12.23    4.22
 -16 -14  -3   14.32    4.67
  -8 -10  -3  133.52    4.26
   1   5  -3  160.36    4.74
   1   9  -3   42.63    3.82
  -1  16  -3   50.83    4.05
 -14 -13  -4    4.17    4.40
  -7  -9  -4   -0.37    3.54
   1   6  -4    4.54    2.96
   1   7  -4  630.72    6.75
   1   8  -4  233.46    4.99
  -3  19  -4   -2.14    4.00
 -12 -12  -5   83.20    4.30
  -6  -8  -5   41.93    3.97
  -5  -7  -5    9.94    3.71
   0  13  -5   -0.78    3.24
 -15 -13  -6   69.28    4.55
  -1  15  -6  143.58    4.42
  -2  17  -6   30.30    4.51
 -13 -12  -7    0.37    4.39
 -11 -11  -7    5.02    3.96
  -3  18  -7   32.88    4.17
 -14 -12  -8   -0.12    4.29
  -7  -8  -8    9.26    3.46
  -1  14  -8   81.21    4.29
  -2  16  -8   44.41    3.92
  -4  19  -8    7.93    4.55
   0   5  -9  358.38    5.56
   0   9  -9  165.22    4.40
 -13 -11 -10   60.69    4.77
 -11 -10 -10    7.18    3.89
  -2  15 -10    3.97    3.67
  -4  18 -10   -1.82    4.70
 -14 -11 -11    0.61    4.21
 -10  -9 -11    8.74    4.03
  -1  11 -11   26.89    3.33
  -2  14 -11   11.18    3.83
  -3  16 -11   26.52    4.27
  -1   5 -12  144.30    4.47
  -1   9 -12   -0.61    3.31
  -2  13 -12   -0.55    3.84
  -4  17 -12    9.47    3.87
  -2   2 -13   97.02    4.62
  -2  12 -13    4.53    3.82
 -15 -10 -14   18.04    4.58
  -5  17 -14   21.83    4.43
  -3  12 -15   19.84    3.75
  -5  16 -15    4.65    4.58
  -3  10 -16    6.13    3.80
  -4  12 -17   12.05    3.57
  -5  14 -17   26.17    4.15
  -4   5 -18  106.33    4.63
  -4   9 -18   23.30    3.98
  -6  13 -19   -4.52    4.64
  -6   3 -20    6.47    3.87
  -6  11 -20    8.26    4.15
  -8  -2 -19    4.84    7.82
  -5   4  24   10.14    6.83
  -5  10  24    5.81    7.47
  -2   8  18  213.04    9.69
  -1   2  13   24.33    7.09
  -5   0 -17    0.00    5.77
  -9   1 -22    1.10    7.38
 -10  -2  28   26.23    5.98
 -10  -4  26  150.62    6.94
  -8  -1  26   16.84    6.40
 -12  -7  25   -5.77    5.82
 -11  -6  25    6.43    6.04
 -10  -5  25   50.95    6.45
 -13  -9  23   -5.59    5.63
  -8  -4  23   -2.91    5.59
  -5   2  23    3.54    5.79
 -11  -8  22    3.23    6.23
 -10  -7  22    2.44    5.31
  -9  -6  22    2.44    5.46
  -4   4  22   10.46    5.96
  -5  14  22    2.73    6.83
 -13 -10  21    2.21    5.77
  -4   2  21    8.07    4.94
 -14 -11  20   10.18    6.67
 -11  -9  20   -3.58    5.81
  -3  10  20    1.69    5.51
  -4  14  20    2.45    5.94
  -3  12  19    5.46    5.45
  -4  15  19   21.96    5.90
 -10  -9  18   10.34    5.42
  -3   1  18   88.00    5.95
  -4  16  18   10.50    6.83
 -14 -12  17   -5.02    5.82
  -5  -4  17    2.84    4.96
  -9  -9  16    5.62    5.74
  -8  -8  16   33.03    5.86
  -7  -7  16   12.22    4.81
  -4  -3  16  135.14    5.83
  -3  -1  16    0.10    5.18
 -15 -13  15    7.52    6.61
 -13 -12  15    6.25    5.95
  -5  -5  15   38.67    5.17
  -1   9  15  331.91    7.76
 -14 -13  13   13.32    5.88
  -8  -9  13  111.12    5.23
  -2  16  12    1.20    6.28
 -10 -11  11    7.00    5.69
  -2  -2  11   55.74    4.84
   0  10  11   16.09    5.08
  -1  14  11   61.15    6.06
 -13 -13  10   49.50    6.43
 -15 -14   9   39.85    5.75
 -11 -12   9   70.81    5.77
   0  12   9   36.05    4.96
 -15 -14   8   14.81    5.67
  -9 -11   6  107.45    5.09
   1   6   6  202.16    6.27
   1   8   6  625.64    8.58
  -2  18   6   12.03    6.06
   0  14   5   55.26    6.10
  -2  -4   2    1.16    4.46
   1  11   2  525.84    7.06
 -15 -14   1   14.52    5.87
  -9 -11   1    7.57    4.76
  -2  -4   1    4.25    4.50
   1  11   1   25.33    5.12
   1  11   0  369.94    6.37
 -13 -13  -1  105.09    5.69
 -11 -12  -1   51.21    5.88
 -16 -14  -2   20.19    6.64
  -8 -10  -2   36.20    5.07
  -1  -2  -2  308.76   10.74
   1   4  -2   29.39    4.82
  -3  -5  -3  430.17    7.76
   1  10  -3    5.07    4.93
   0  14  -3   21.88    4.58
  -2  18  -3    2.05    5.95
 -10 -11  -4   35.57    5.80
   1   9  -4   19.35    5.06
  -1  16  -4   -0.60    5.40
  -3  19  -5    4.08    5.51
  -9 -10  -6   31.50    4.84
  -8  -9  -7   25.69    4.97
   0  12  -7   -4.68    4.72
 -10 -10  -8   -0.03    5.74
  -6  -7  -8   47.13    5.33
  -5  -6  -8  211.86    6.82
   0  11  -8  150.06    5.25
  -3  18  -8    9.70    5.62
 -15 -12  -9    2.77    5.66
  -8  -8 -10    3.32    4.75
  -3  17 -10   30.50    5.76
 -12 -10 -11   98.13    5.96
  -4  18 -11    5.86    6.41
  -1  10 -12   -3.44    4.64
 -14 -10 -13    8.93    5.96
 -10  -8 -13    1.96    5.56
  -3  15 -13   24.20    6.13
  -2  11 -14  107.68    5.82
  -3  14 -14  225.63    5.84
 -14  -9 -15    3.22    5.60
  -2   7 -15    1.71    4.63
  -2   8 -15   22.72    4.66
  -4  15 -15   10.07    5.76
 -13  -8 -16   23.48    5.89
 -11  -7 -16    4.40    5.33
  -3  11 -16   18.61    5.39
  -4   2 -17  150.53    5.89
  -4  10 -18   94.46    5.63
  -5  13 -18  106.62    6.14
  -5  11 -19  117.99    6.36
  -6   7 -21    9.59    6.14
  -6   8 -21   23.04    6.18
  -7   7 -22   -0.73    5.90
  -7   8 -22   47.03    5.97
  -9   3 -23    0.65    5.85
 -11  -2  29    9.00    4.90
  -9   0  28    4.30    4.18
 -10  -3  27   25.81    4.58
 -13  -7  26   17.63    4.76
 -12  -6  26    7.55    4.00
 -11  -5  26   -4.54    4.15
  -8  -2  25   54.48    4.24
  -8  -3  24   44.12    4.20
 -12  -8  23   33.62    4.46
 -14 -10  22   15.33    4.75
 -12  -9  21   23.13    4.45
  -7  -4  21   35.88    4.35
 -10  -8  20  272.70    5.09
  -9  -7  20   32.78    4.11
  -8  -6  20   53.38    4.22
 -12 -10  19   30.89    4.50
  -6  -4  19   26.71    3.56
 -15 -12  18   10.26    4.74
 -13 -11  18    9.51    4.36
  -9  -8  18    6.44    4.01
  -8  -7  18   43.95    4.27
  -7  -6  18   -0.57    3.43
 -11 -10  17   49.45    4.06
  -3   0  17   -0.05    3.54
 -12 -11  16   46.96    4.64
  -2  13  16    7.29    4.00
 -10 -10  15   37.49    4.06
  -2  14  15  214.78    5.29
 -15 -13  14   23.33    4.08
 -13 -12  14    6.57    4.30
 -11 -11  14   84.45    4.23
  -4  -4  14  185.17    4.88
  -3  17  14   12.20    4.16
  -7  -8  13  103.47    3.99
  -6  -7  13    2.63    3.58
 -14 -13  12    6.48    4.18
 -12 -12  12   44.29    3.93
  -9 -10  12   59.30    4.42
  -3  18  12   -3.22    4.88
 -16 -14  11   54.69    4.76
 -16 -14  10   19.78    4.80
 -10 -11  10   97.62    4.46
  -3  -4  10   70.26    3.64
  -1  15  10   11.72    4.01
  -2  17  10   11.75    4.39
 -13 -13   9    1.33    4.46
  -7  -9   9  127.97    4.11
  -6  -8   9   27.36    3.74
  -5  -7   9   76.84    4.08
  -3  19   9   38.01    4.92
 -13 -13   8   59.43    4.78
 -11 -12   8  114.57    4.35
  -8 -10   8    6.64    3.40
  -4  -6   8   10.98    3.74
  -2  -3   8  467.74    7.20
   0  13   8   40.85    3.64
 -15 -14   7   21.28    4.12
 -11 -12   7  210.60    4.79
  -8 -10   7    6.91    3.39
  -1  16   7   16.72    3.92
  -2  18   7   39.72    4.41
 -15 -14   6   25.33    4.14
  -3  -5   6   42.11    3.38
   1   9   6   10.61    3.84
   0  14   6   20.39    4.30
 -15 -14   5   -2.19    4.16
  -9 -11   5   21.71    3.50
   1  10   5  210.48    4.91
  -3  20   5   19.34    4.65
 -15 -14   4    2.14    4.23
  -9 -11   4   53.64    3.60
  -1  -2   4  129.30    5.52
   1   4   4  100.67    5.03
   1  11   4  149.74    4.54
  -3  20   4    3.53    4.46
 -15 -14   3    3.62    4.13
  -9 -11   3   16.55    3.46
   1  11   3   93.91    4.13
  -1  17   3  122.84    4.32
  -3  20   3   -1.62    4.60
 -15 -14   2    7.20    4.13
  -9 -11   2   13.76    3.50
  -1  17   2   11.40    3.77
  -3  20   2    1.62    4.55
 -13 -13   1    3.15    3.79
   0  15   1   -3.42    3.93
  -1  17   1  628.86    6.24
  -3  20   1   -1.09    4.60
 -13 -13   0   84.16    4.23
 -11 -12   0   46.34    4.18
  -1  17   0    0.24    3.90
  -3  20   0   12.75    4.45
 -16 -14  -1   10.44    4.89
  -8 -10  -1  234.32    4.72
   1  11  -1  175.19    4.45
  -1  17  -1  514.87    5.79
  -3  20  -1    7.74    4.56
   1  11  -2  246.11    4.76
  -3  20  -2   26.95    4.57
 -14 -13  -3    6.55    4.38
  -7  -9  -3  269.12    5.13
 -12 -12  -4   72.71    4.25
  -6  -8  -4  426.01    6.22
  -4  -6  -4    1.43    2.99
   1   5  -4   43.84    3.45
   1  10  -4   48.01    3.76
   0  14  -4   63.16    4.22
  -2  18  -4   10.49    4.08
 -15 -13  -5   38.10    4.40
   1   6  -5   -1.37    2.93
   1   7  -5   15.90    2.97
   1   8  -5   77.44    4.11
   1   9  -5  193.59    4.66
  -1  16  -5   48.34    4.01
  -2  18  -5   -2.62    4.18
 -16 -13  -6    2.53    4.61
 -13 -12  -6    6.90    4.49
 -11 -11  -6   -3.54    3.98
   0  13  -6   48.27    3.50
  -3  19  -6   10.81    3.87
  -1  15  -7    1.75    3.84
  -2  17  -7   30.39    4.48
 -12 -11  -8   47.77    4.11
   0  12  -8   95.38    3.78
  -9  -9  -9    1.54    3.32
   0  10  -9   14.41    3.41
  -1  14  -9   24.34    4.00
  -2  16  -9   -1.32    3.68
  -3  18  -9    8.51    4.10
   0   7 -10   45.79    3.83
   0   8 -10  210.05    4.67
  -1  13 -10   10.88    3.88
  -1  12 -11  101.58    4.44
  -2  15 -11   77.94    4.15
 -13 -10 -12   -0.92    4.34
  -1   4 -12   31.56    3.86
  -1  11 -12   17.96    3.31
  -2  14 -12    5.23    3.64
  -3  16 -12   33.74    4.35
  -1   7 -13  238.50    4.79
  -1   8 -13  106.35    3.95
  -2  13 -13   32.20    3.97
  -4  17 -13   50.47    4.84
  -2  12 -14  114.99    4.44
  -4  16 -14   -0.25    3.95
  -2   6 -15  546.22    6.16
  -2   9 -15   76.58    3.65
  -3  13 -15   85.98    4.06
  -3  12 -16    4.59    3.65
  -4  14 -16    9.25    4.31
  -5  16 -16   11.23    4.34
  -3   6 -17    0.80    3.26
  -3   7 -17  151.80    4.83
  -3   8 -17    4.66    3.93
  -3   9 -17  167.85    4.63
  -4  13 -17   14.64    4.21
  -5  15 -17    8.69    4.58
  -4   4 -18   79.73    3.94
  -4  11 -18    3.35    3.68
  -5   3 -19   72.40    4.57
  -5  12 -19    9.19    4.15
  -5   7 -20    3.60    3.73
  -5   8 -20   38.03    3.83
  -6  12 -20   -2.73    3.92
  -6   6 -21   13.33    3.71
  -6   9 -21    5.67    4.18
  -7   6 -22   -0.04    4.12
  -7   9 -22   32.61    4.03
  -8   6 -23    0.86    4.01
  -8   7 -23   26.53    4.12
  -8   8 -23    3.00    4.75
 -13  -5 -20   31.84    9.74
  -9  -2 -20   17.51    7.74
  -6   6  26    0.43    7.63
  -2   9  18   36.70    7.58
  -4  -4 -10   66.47    7.20
  -8  -6 -14   40.73    7.38
 -11   0 -23   -1.14    8.11
  -9   2  29   35.30    6.92
 -11  -3  28   39.92    7.07
 -11  -4  27   53.77    6.34
  -7   4  27    1.32    6.15
  -7   0  25    2.32    5.48
  -6   1  24   -0.22    5.67
 -11  -7  23   42.54    6.25
  -9  -5  23   -0.15    5.47
  -4  13  21   24.19    6.40
 -13 -10  20   33.10    6.04
 -14 -11  19   22.55    5.69
  -3  14  18   -1.27    6.34
  -4  -2  17   95.88    5.67
  -2  12  17   13.65    5.79
  -3  15  17    2.23    6.08
 -14 -12  16    7.70    5.92
  -3  16  16    2.64    6.04
  -9  -9  15    3.63    5.71
  -1  10  15   -0.01    4.72
  -2   0  14  498.01    9.22
  -1  12  14   44.07    6.10
  -2  15  14   35.95    6.64
 -11 -11  13   25.54    5.62
  -1  13  13   84.84    6.21
  -8  -9  12   27.58    4.91
  -5  -6  12  175.38    5.84
   0   7  12   15.47    5.26
   0   8  12  122.73    6.20
  -1  14  12   92.57    6.10
 -14 -13  11   40.32    6.15
 -12 -12  11   -8.38    5.32
  -2  17  11   20.56    6.26
   0  12  10   49.56    5.09
  -3  19  10   -8.17    6.71
  -7  -9   8    4.62    4.97
  -5  -7   8   56.48    5.43
  -1  -1   8   46.77    5.15
  -1  16   8   43.65    5.60
  -2  18   8  -10.50    6.06
 -13 -13   7   48.96    5.48
   1   7   7   50.43    5.64
   1   8   7   54.11    5.66
   0  14   7  525.67    7.83
 -13 -13   6    5.46    5.24
 -11 -12   6   27.84    5.81
  -8 -10   6   61.30    5.10
   1  10   6   27.23    5.19
 -11 -12   5  300.94    6.61
  -1  17   5   14.58    5.35
  -1  17   4   11.16    5.27
   0  15   3   -1.14    5.54
 -13 -13   2   17.32    5.29
 -11 -12   2   17.82    5.68
   0  15   2    4.87    5.57
  -2  19   2   12.24    5.63
 -11 -12   1   50.55    5.77
   1  12   1   36.49    5.03
  -2  19   1  -15.16    5.81
 -16 -14   0    3.42    6.76
  -8 -10   0    3.52    4.91
   1  12   0   37.33    4.92
   0  15   0   -7.27    5.59
  -2  19   0   -4.88    5.76
   0  15  -1    6.93    5.50
 -14 -13  -2   12.53    6.32
  -1  17  -2   14.39    5.37
 -12 -12  -3   50.70    5.70
 -10 -11  -3   12.58    5.88
   1   4  -3    7.35    4.44
   1  11  -3   53.37    5.10
  -5  -7  -4  203.38    6.38
  -9 -10  -5   16.75    4.88
  -2  -3  -5    3.19    4.33
   0  14  -5   63.60    5.91
  -1  16  -6   33.12    5.35
 -14 -12  -7   28.66    6.17
   0  13  -7   86.18    4.89
  -3  19  -7   17.15    6.70
   0   3  -8  280.13    6.58
  -1  15  -8  341.88    6.41
  -2  17  -8    0.69    6.02
 -13 -11  -9    5.91    6.24
   0   4  -9  187.40    5.48
   0  11  -9   16.49    4.75
  -7  -7 -10  162.30    6.15
   0   6 -10   57.04    5.28
   0   9 -10    5.81    4.80
  -2  16 -10   68.44    6.30
 -15 -11 -11   -2.48    6.36
  -3  17 -11   10.42    5.76
 -11  -9 -12    8.86    5.48
  -8  -7 -12   89.21    5.57
 -12  -9 -13   29.96    5.99
  -1   6 -13  308.55    6.28
  -1   9 -13  390.93    6.20
 -13  -9 -14    5.26    6.02
 -11  -8 -14   11.21    5.46
  -2   3 -14  165.88    6.09
 -12  -8 -15   -0.27    6.29
  -2   5 -15   54.12    5.08
  -2  10 -15    1.07    5.50
  -3   3 -16  100.40    5.55
  -3  10 -17    1.02    5.33
 -14  -7 -18   14.47    6.75
  -5   1 -18  167.12    6.24
  -5  14 -18    4.22    5.45
  -5   6 -20    0.18    5.31
  -5   9 -20   56.62    6.25
  -7   2 -21    1.27    5.26
  -6   5 -21   21.96    5.29
  -6  10 -21   15.66    5.75
  -7   5 -22   62.22    6.30
  -7  10 -22   20.39    6.62
 -10   1 -23   -0.43    5.76
  -8   5 -23    9.42    5.83
 -10   0  29    0.41    4.85
 -12  -4  28   76.55    5.08
 -12  -5  27    8.37    4.90
  -9  -1  27   59.53    4.75
  -8   1  27    2.55    4.46
 -13  -8  24   -1.30    4.01
 -12  -7  24    0.72    4.25
  -9  -4  24   22.49    3.97
  -7  -1  24   34.28    4.19
 -14  -9  23    2.43    4.62
 -10  -6  23    5.03    3.76
  -7  -2  23    6.12    3.97
 -13  -9  22   -5.66    4.18
  -7  -3  22   52.28    4.39
 -14 -10  21   12.19    4.13
 -11  -8  21   11.50    4.41
  -8  -5  21  207.17    5.08
 -15 -11  20   19.77    4.65
  -6  -3  20  128.84    4.26
 -11  -9  19   64.48    4.12
  -7  -5  19    4.62    3.37
 -12 -10  18    9.18    4.40
  -5  -3  18   98.93    4.24
 -15 -12  17    5.91    4.62
 -13 -11  17    1.04    4.31
 -10  -9  17   21.22    4.11
  -6  -5  17   22.72    3.61
 -11 -10  16   98.75    4.37
 -14 -12  15    4.71    4.16
 -12 -11  15   41.19    3.88
  -8  -8  15   41.50    3.55
  -7  -7  15   32.19    3.65
  -6  -6  15   63.80    3.87
 -10 -10  14   -1.38    4.10
  -3  -2  14   47.38    4.11
 -15 -13  13   12.79    4.10
 -13 -12  13    2.52    4.36
  -2  16  13   20.14    4.60
  -3  18  13   15.50    4.76
 -11 -11  12  244.56    4.96
  -7  -8  12   78.36    3.87
  -6  -7  12  438.65    5.65
  -3  -3  12    0.99    3.69
   0   9  12   25.23    3.75
  -9 -10  11  257.56    4.47
  -4  -5  11  304.67    5.50
   0  11  11   11.36    3.56
 -14 -13  10   74.78    4.71
 -12 -12  10    4.18    3.81
  -1   0  10 1013.17   13.45
 -10 -11   9   -1.02    4.07
   0  13   9   53.99    4.44
  -1  16   9   -2.40    3.88
  -2  18   9    0.95    4.29
 -16 -14   8   33.76    4.74
 -10 -11   8   25.73    4.17
  -6  -8   8   -1.67    3.57
 -16 -14   7    4.66    4.69
  -7  -9   7  226.71    4.68
  -4  -6   7  219.21    4.58
   1   9   7 1879.61   11.75
 -16 -14   6   -3.43    4.84
   1   5   6  162.45    5.60
  -1  17   6   40.15    3.93
 -16 -14   5   -4.68    4.81
 -13 -13   5   56.09    4.03
  -8 -10   5  150.38    4.28
  -3  -5   5   48.74    3.61
   1  11   5  485.53    6.12
   0  15   5   17.15    4.11
  -2  19   5   11.59    4.05
 -16 -14   4    1.50    3.99
 -13 -13   4   13.67    3.72
 -11 -12   4   46.02    4.16
  -8 -10   4  152.27    4.29
   0  15   4   13.03    4.10
  -2  19   4   -5.10    4.08
 -16 -14   3   -3.42    4.01
 -13 -13   3   30.34    3.94
 -11 -12   3   29.70    4.03
  -8 -10   3  169.98    4.32
  -1  -2   3    3.77    3.41
   1  12   3    1.53    3.51
  -2  19   3    0.37    4.08
 -16 -14   2    9.92    4.69
  -8 -10   2   25.87    3.68
   1  12   2  155.61    4.36
 -16 -14   1   11.27    4.69
  -8 -10   1  124.08    4.20
 -14 -13  -1   16.20    4.31
   1  12  -1   18.38    3.48
  -2  19  -1   11.26    3.92
 -12 -12  -2   68.53    4.37
 -10 -11  -2   87.72    4.52
  -7  -9  -2   50.36    3.86
  -3  -5  -2   41.83    3.65
   1  12  -2   28.94    3.56
   0  15  -2   12.57    3.94
  -2  19  -2    4.74    4.03
  -6  -8  -3   82.45    4.23
  -4  -6  -3  127.53    4.33
   0  15  -3    6.20    3.90
  -1  17  -3   60.85    4.02
  -2  19  -3   37.73    4.26
 -15 -13  -4   34.20    4.34
   1  11  -4   -1.85    3.41
  -1  17  -4   30.26    3.84
 -16 -13  -5    7.50    4.82
 -13 -12  -5    4.76    3.83
 -11 -11  -5   51.22    4.26
   1   5  -5   17.33    3.16
   1  10  -5   11.78    3.46
  -8  -9  -6   56.27    3.82
   1   6  -6   31.78    3.15
   1   7  -6  287.77    4.96
   1   8  -6  975.26    7.70
   1   9  -6  114.63    4.11
   0  14  -6   31.49    4.10
  -2  18  -6    0.92    4.21
 -10 -10  -7   75.58    4.60
  -7  -8  -7    2.74    3.48
   0   2  -7  465.86    8.24
  -1  16  -7   -1.87    3.73
 -15 -12  -8    3.75    4.09
  -3  19  -8    7.28    4.66
 -16 -12  -9    4.34    4.64
 -11 -10  -9  383.43    6.06
   0  12  -9   30.75    3.40
  -1  15  -9   13.08    3.83
  -2  17  -9    5.58    4.35
 -14 -11 -10    0.87    4.25
   0   5 -10  193.87    5.00
   0  10 -10   -1.26    3.28
  -1  14 -10  209.86    4.78
  -3  18 -10    8.66    3.90
  -1  13 -11    2.43    3.88
  -1  12 -12   46.41    4.21
  -2  15 -12    5.68    3.61
  -1   5 -13   44.62    3.78
  -1  10 -13    2.08    3.35
  -2  14 -13   86.30    4.13
  -3  16 -13   10.57    4.10
  -2  13 -14    3.67    3.75
  -3  15 -14   -0.18    4.23
  -4  17 -14    7.80    4.66
  -2  11 -15   27.24    3.93
  -3  14 -15   16.98    4.29
  -4  16 -15    4.65    3.90
  -3  13 -16   58.30    3.86
  -4  15 -16   18.61    4.13
  -3   5 -17   33.16    3.53
  -3  11 -17   55.74    4.12
  -4  14 -17   52.93    4.39
  -4  12 -18   16.55    4.33
  -4   7 -19   59.47    4.19
  -4   8 -19   -1.64    3.80
  -4   9 -19   36.15    3.89
  -5  13 -19   50.74    4.23
  -5   5 -20  153.02    4.83
  -5  10 -20    3.84    4.30
  -6  13 -20    6.45    4.50
  -6  11 -21    1.63    3.92
  -5  13  23   -5.34    8.36
  -4  11  22  242.35    9.81
  -2   2  16    2.27    6.32
  -7  -5 -14    7.77    5.88
 -12  -6 -18    3.16    7.41
  -8  -1 -20   10.37    6.71
  -8   3  28   34.65    6.33
  -9  -2  26   17.80    6.44
  -7   2  26   -0.95    6.44
  -9  -3  25   19.84    5.93
  -6   3  25   19.53    5.68
 -11  -6  24   -7.57    6.22
 -10  -5  24   14.37    6.50
  -5   5  24    0.72    5.62
  -6   0  23    0.76    5.81
  -5   1  22    1.74    5.96
 -10  -7  21   95.04    5.76
  -9  -6  21   89.53    5.96
  -6  -2  21   74.37    6.35
 -12  -9  20   24.71    6.26
  -4   1  20   49.73    5.39
  -3  11  20  108.95    6.50
 -10  -8  19   45.68    5.71
  -5  -2  19   78.19    5.38
  -4   0  19   -1.38    4.97
  -3  13  19    5.73    6.31
 -14 -11  18    9.98    5.79
  -4  -1  18   95.05    5.70
  -2  10  18   36.85    6.08
  -9  -8  17   -5.59    5.67
  -8  -7  17  -11.58    5.31
  -7  -6  17   19.04    4.85
  -5  -4  16   32.16    5.15
  -2   1  15  365.19    8.90
  -1  11  15    2.11    5.84
  -3  17  15   30.30    6.56
 -16 -13  14   -0.20    6.51
  -9  -9  14    5.14    5.83
  -5  -5  14   14.21    5.02
 -10 -10  13  155.12    6.23
 -15 -13  12   -6.04    5.78
   0   6  12   50.30    5.98
   0  10  12  149.78    5.98
  -8  -9  11    0.38    4.79
  -1  15  11   16.24    5.57
  -9 -10  10    1.24    4.71
 -14 -13   9   44.26    6.30
 -12 -12   9   26.88    5.58
   0  14   8    4.93    6.00
  -6  -8   7   -1.53    5.10
  -5  -7   7  234.41    6.18
   1   6   7   28.71    4.60
   1  10   7   60.60    5.36
  -1  17   7   62.57    6.56
  -7  -9   6   19.18    5.09
  -4  -6   6  133.26    4.99
   1  11   6   25.47    5.19
   0  15   6  125.87    6.13
  -2  19   6   19.57    5.84
  -3  -5   4   96.76    5.06
   1  12   4   47.14    5.06
   1   3   1   81.25    6.10
 -14 -13   0    9.83    6.30
   1   3   0  349.91    8.92
 -10 -11  -1    2.96    5.87
  -7  -9  -1   86.44    5.45
  -3  -5  -1  256.74    6.45
  -1  -2  -1   -0.29    4.69
 -15 -13  -3  142.47    6.68
  -5  -7  -3    8.55    5.33
   1  12  -3    0.60    4.82
  -9 -10  -4   26.47    4.91
   1   4  -4    3.97    4.31
   0  15  -4   23.68    5.53
  -2  19  -4   -4.47    5.76
   0   1  -5   55.53    5.71
   1  11  -5  159.34    5.49
  -1  17  -5   16.81    5.10
   1  10  -6    3.02    4.91
 -12 -11  -7   22.05    5.64
  -4  -5  -7  196.04    7.05
  -2  18  -7   -0.07    5.81
  -1   0  -8  395.13   10.78
   0  13  -8   42.82    4.67
 -10  -9 -10  133.98    6.36
  -6  -6 -10   34.98    5.37
  -5  -5 -10   51.17    5.67
   0  11 -10   17.85    4.71
  -9  -8 -11  121.89    6.60
  -1   2 -11   46.28    4.59
   0   7 -11   24.41    5.01
   0   8 -11    4.09    4.86
  -2  16 -11   15.55    6.03
  -3  17 -12    6.00    5.57
 -15 -10 -13   24.85    6.85
  -1  11 -13   45.18    5.76
  -9  -6 -15  166.61    7.25
  -2   4 -15   82.53    5.33
  -2   8 -16  260.97    5.60
  -4   3 -18   44.28    4.95
  -4   6 -19    4.29    5.52
  -4  10 -19   11.37    5.18
  -6   2 -20   10.08    5.48
  -5  11 -20   11.42    5.90
  -6   4 -21    8.18    5.33
  -8   2 -22    7.70    6.18
  -7   4 -22   12.29    6.16
 -10   3 -24   47.01    6.74
  -9   5 -24   28.23    6.69
 -10  -1  28   19.69    4.21
 -13  -7  25  -10.65    4.89
 -12  -6  25    3.81    4.07
 -10  -4  25    2.55    4.59
 -13  -8  23    1.80    4.10
 -12  -8  22   52.56    4.55
 -11  -7  22   11.72    4.57
  -8  -4  22    4.98    3.95
  -6  -1  22   25.57    4.35
 -13  -9  21   33.86    4.33
  -5   0  21   -0.44    3.39
 -14 -10  20   12.32    4.16
  -5  -1  20   15.83    3.61
 -15 -11  19   42.30    4.84
 -13 -10  19    8.88    4.33
  -9  -7  19  419.88    5.73
  -8  -6  19   -0.07    4.10
 -11  -9  18    6.37    3.73
 -12 -10  17    3.45    3.71
 -15 -12  16   18.73    4.11
 -13 -11  16   -3.95    4.32
 -10  -9  16   53.60    4.24
  -2  14  16   51.58    4.99
 -11 -10  15  126.04    4.48
  -4  -3  15   42.32    3.99
  -2  15  15   11.75    4.52
 -14 -12  14   23.93    4.30
 -12 -11  14    9.24    3.77
  -8  -8  14    5.02    3.37
  -6  -6  14  150.36    4.41
  -3  18  14   12.02    4.92
 -16 -13  13   62.84    4.92
  -4  -4  13    6.16    3.64
 -13 -12  12   19.46    3.72
  -2  -1  12   77.14    4.11
  -2  17  12    4.95    4.29
 -15 -13  11   21.62    4.29
 -13 -12  11    5.61    3.72
 -11 -11  11    6.09    3.93
  -7  -8  11  131.29    4.20
  -6  -7  11   10.11    3.63
  -5  -6  11  354.77    5.52
   0  12  11   70.61    3.92
 -15 -13  10   -2.02    4.20
  -8  -9  10   20.80    3.56
  -4  -5  10  133.62    4.56
  -2  -2  10    0.65    3.02
   0  13  10   -2.90    4.18
  -1  16  10   10.00    3.79
  -2  18  10   12.24    4.16
  -9 -10   9   25.71    3.40
  -3  -4   9  665.19    7.43
 -14 -13   8  249.87    5.30
 -12 -12   8    8.57    3.87
   1   8   8   93.12    4.61
  -1  17   8   15.41    4.51
 -14 -13   7    3.44    4.41
 -12 -12   7   34.74    4.02
 -10 -11   7   13.09    4.25
  -2  -3   7  381.31    6.71
   0  15   7   74.49    4.42
  -2  19   7    3.25    4.10
 -14 -13   6  169.58    5.04
 -10 -11   6   10.60    4.17
  -6  -8   6   18.66    3.72
  -5  -7   6   70.44    4.18
 -17 -14   5    0.45    4.53
 -14 -13   5    3.29    4.46
 -10 -11   5   48.38    3.51
  -7  -9   5   -1.28    3.54
  -6  -8   5   13.26    3.69
  -4  -6   5    2.08    2.99
   1   4   5  151.77    5.93
   1  12   5  181.74    4.55
 -17 -14   4   -3.56    4.54
 -14 -13   4    9.56    4.38
  -7  -9   4   72.68    4.02
  -1  18   4    3.07    4.30
 -17 -14   3    4.28    4.56
 -14 -13   3   -1.11    4.37
  -7  -9   3   15.69    3.59
  -3  -5   3  121.97    4.43
   1  13   3    3.02    3.28
   0  16   3   11.67    3.96
  -1  18   3    2.72    4.35
 -17 -14   2    5.11    4.49
 -14 -13   2   -1.80    4.47
  -7  -9   2  162.75    4.45
  -3  -5   2  366.57    6.20
  -1  -2   2    9.50    3.58
   1   3   2  281.22    8.08
   1  13   2   23.56    3.43
   0  16   2  110.88    4.44
  -1  18   2   -1.20    4.32
 -14 -13   1   -2.28    4.39
 -10 -11   1   -1.70    3.31
  -7  -9   1    6.14    3.60
  -3  -5   1  110.54    4.34
   1  13   1    1.39    3.32
   0  16   1   13.45    3.87
  -1  18   1    3.96    4.28
 -12 -12   0   23.15    4.09
 -10 -11   0    4.16    3.34
  -7  -9   0  123.77    4.29
  -3  -5   0  372.09    6.48
  -1  -2   0   22.14    4.07
   1  13   0    6.12    3.38
   0  16   0  352.83    5.28
  -1  18   0   12.93    4.35
 -12 -12  -1   12.67    4.01
  -6  -8  -1    7.80    3.66
   1   3  -1 1094.98   13.09
   1  13  -1   14.16    3.32
   0  16  -1    3.02    3.93
  -1  18  -1    3.55    4.24
 -15 -13  -2   12.79    4.36
  -6  -8  -2  268.31    5.21
  -5  -7  -2  146.66    4.79
  -4  -6  -2  211.30    5.02
   1  13  -2   -0.74    3.31
   0  16  -2   99.28    4.38
  -1  18  -2   11.86    4.28
  -9 -10  -3  121.60    4.19
   1  13  -3    9.27    3.34
  -1  18  -3   18.50    4.36
 -16 -13  -4   33.06    4.86
 -13 -12  -4   36.36    4.04
 -11 -11  -4   25.10    4.22
   1  12  -4   52.51    3.68
  -8  -9  -5  110.22    4.19
   1  12  -5  105.92    3.91
   0  15  -5   17.00    3.98
  -2  19  -5   75.72    4.29
 -14 -12  -6   21.81    4.34
   1   5  -6   47.42    3.48
   1  11  -6   30.72    3.63
   0  15  -6  122.35    4.31
  -1  17  -6   24.78    4.41
 -15 -12  -7   -1.36    4.18
  -6  -7  -7  125.46    4.59
   1   7  -7   93.14    4.20
   1   8  -7    7.12    3.73
   1   9  -7  448.56    5.72
   1  10  -7    8.47    3.52
   0  14  -7  502.34    5.75
 -16 -12  -8    2.21    4.85
 -13 -11  -8   34.09    4.70
  -9  -9  -8   23.10    3.52
  -1  16  -8   24.75    3.88
  -2  18  -8   -7.30    4.15
  -8  -8  -9  126.27    4.46
   0  13  -9   48.99    4.26
  -3  19  -9    4.11    4.45
 -12 -10 -10   17.86    3.98
   0  12 -10   46.10    3.42
  -1  15 -10   17.87    3.81
  -2  17 -10   -6.72    4.15
 -13 -10 -11  101.04    5.04
   0   6 -11   46.34    3.88
   0   9 -11   -1.28    3.39
   0  10 -11   14.89    3.42
  -1  14 -11   72.60    4.21
  -3  18 -11   13.24    4.64
 -14 -10 -12   28.81    4.38
  -7  -6 -12   17.35    3.63
  -1   3 -12  455.77    6.95
  -1  13 -12   71.80    4.14
  -1  12 -13   17.87    3.95
  -2  15 -13   58.76    4.61
  -3  17 -13    2.32    3.99
  -1   7 -14   15.04    3.44
  -1   8 -14   -4.76    3.35
  -1   9 -14    2.84    3.22
  -1  10 -14    7.28    3.23
  -2  14 -14   28.57    3.71
  -3  16 -14    9.78    4.11
 -15  -9 -15   -1.57    4.62
  -2  12 -15    2.69    3.76
  -3  15 -15   19.65    4.21
  -2   6 -16    1.25    3.30
  -2   7 -16    3.56    3.31
  -2   9 -16    2.77    4.04
  -2  10 -16   29.32    4.03
  -3  14 -16   27.66    4.26
  -4  16 -16    2.77    4.48
  -3   4 -17    3.37    3.32
  -3  12 -17   -0.22    3.67
  -4  15 -17   -8.87    3.95
  -3   7 -18   10.63    3.96
  -3   8 -18   11.32    3.89
  -3   9 -18   -2.96    3.81
  -4  13 -18    3.62    4.12
  -4   5 -19    5.02    3.90
  -4  11 -19   85.78    4.76
  -5  14 -19    9.49    4.64
  -5   4 -20    1.26    3.89
  -5  12 -20   -4.46    4.06
  -6  12 -21   15.47    4.68
  -8   4 -23   26.10    4.35
 -13  -4 -21   -0.39   12.14
  -6   7  26   14.54    9.98
  -7  -2 -18   19.37    9.42
  -6  -4 -14    6.69    6.94
  -3  -3  -9  718.69   16.76
  -7  -1 -19   53.38    7.54
  -9  -1 -21    1.73    7.69
 -11  -1  29   13.11    6.70
  -9   3  29   20.09    7.05
  -9   1  28    2.43    6.10
 -10  -2  27   55.94    6.37
 -13  -6  26   -5.10    6.74
 -10  -3  26  115.64    6.73
  -8   0  26   19.70    6.37
 -11  -5  25   13.41    6.14
 -14  -8  24    9.57    6.47
  -8  -3  23   33.85    5.79
  -5   3  23    8.76    5.82
 -10  -6  22    0.60    5.44
  -9  -5  22   -1.17    5.56
 -11  -8  20    9.45    5.32
  -7  -4  20  205.28    6.72
  -4  15  20   15.48    6.80
  -6  -4  18   36.82    5.05
 -14 -11  17    9.01    5.89
  -6  -5  16    1.09    4.90
  -7  -7  14   -5.56    4.91
  -1  13  14  117.65    6.36
  -2  16  14   -8.97    6.16
 -12 -11  13   57.10    5.59
  -9  -9  13    8.74    4.63
  -1  14  13   99.07    6.15
 -10 -10  12    4.77    5.74
  -1  15  12   16.58    5.56
 -11 -11  10   50.95    5.78
   0  14   9  298.62    7.04
  -9 -10   8    7.98    4.79
   1   7   8   40.04    5.65
   1   9   8   85.34    5.82
  -2  19   8   12.37    6.47
   1  11   7  230.91    6.18
 -12 -12   6  -12.60    5.56
   1  12   6    4.92    4.90
  -5  -7   5  663.47    7.81
  -1  18   5   -0.38    6.23
 -10 -11   4   29.43    4.77
   1  13   4   31.96    4.82
   0  16   4   10.77    5.54
 -10 -11   3    5.42    4.67
 -10 -11   2   26.64    4.78
  -2  20   2   53.06    6.73
 -12 -12   1   11.12    5.59
  -1  -2   1    7.35    4.89
  -2  20   1   74.38    6.83
  -2  20   0   70.57    6.76
 -15 -13  -1  129.19    6.54
   1   3  -2  557.92   10.00
 -13 -12  -3   21.58    5.51
   0  16  -3   22.54    5.38
 -14 -12  -5    6.69    6.31
 -12 -11  -6    4.22    5.51
 -10 -10  -6   23.98    5.97
  -7  -8  -6    5.50    4.93
  -3  -4  -6  120.79    6.08
  -2  19  -6   15.06    5.69
  -5  -6  -7   50.35    5.50
   1   6  -7   16.33    4.15
  -1  17  -7   15.29    6.18
 -11 -10  -8  122.96    6.18
   0  14  -8    5.55    5.78
 -14 -11  -9    0.74    6.09
  -1  16  -9   -3.18    5.19
 -15 -11 -10    1.27    5.81
  -1   1 -10    0.63    4.07
   0   4 -10  234.46    5.75
 -11  -9 -11    4.27    5.51
   0  11 -11    8.63    4.66
  -2  16 -12   45.47    6.14
  -9  -7 -13   80.19    6.38
  -1   4 -13    5.43    5.03
  -3   0 -14  210.68    7.62
  -1   6 -14  131.97    5.51
  -3   1 -15  118.21    6.09
  -2  13 -15   10.89    5.22
 -14  -8 -16    6.43    5.66
 -10  -6 -16  115.69    6.66
  -2  11 -16   50.35    5.60
 -13  -7 -17    4.58    5.83
 -11  -6 -17   14.19    5.85
  -3  10 -18   46.75    5.41
  -5   2 -19   49.56    6.06
  -5   8 -21   -1.23    6.09
  -6   7 -22    3.11    5.97
  -6   8 -22   60.43    6.06
  -6   9 -22    9.24    5.83
  -9   2 -23   97.77    6.67
  -7   7 -23    1.09    5.63
  -7   8 -23   16.25    5.50
  -7   9 -23   12.92    6.56
 -11  -2  28   14.43    4.17
 -13  -5  27   -0.22    4.60
 -12  -4  27    9.34    4.10
 -11  -3  27   33.19    4.31
 -12  -5  26   20.25    4.22
 -11  -4  26   10.58    4.30
  -8  -1  25   42.54    4.07
  -7   1  25   18.31    4.08
  -8  -2  24   14.06    3.86
 -12  -7  23    9.98    4.26
 -14  -9  22   21.74    4.02
 -15 -10  21    1.42    4.72
 -12  -8  21   -0.37    4.43
 -10  -7  20   40.76    4.19
  -9  -6  20    2.50    4.06
  -8  -5  20    6.51    4.13
 -12  -9  19   35.54    3.94
 -15 -11  18   16.07    4.17
 -13 -10  18    1.20    4.36
 -10  -8  18  208.72    4.82
  -9  -7  18   17.90    4.18
  -7  -5  18   32.59    3.57
  -3  15  18   15.63    4.36
 -11  -9  17   12.30    3.93
  -5  -3  17   95.09    4.25
  -2  13  17    5.56    3.85
  -3  16  17    6.32    4.15
 -16 -12  16   17.45    4.84
 -12 -10  16    2.31    3.81
  -9  -8  16   12.66    4.12
  -8  -7  16    5.59    3.29
  -7  -6  16   -5.85    3.45
  -3  17  16   57.75    5.10
 -13 -11  15   17.81    4.56
 -10  -9  15   12.45    3.99
  -3  -1  15   50.35    4.22
 -15 -12  14   -2.79    4.16
 -11 -10  14  137.55    4.61
  -8  -8  13   62.08    3.76
  -5  -5  13   15.64    3.65
  -2  17  13   10.47    4.37
 -14 -12  12   15.62    4.45
 -12 -11  12    8.12    3.83
   0  11  12  104.53    4.36
 -16 -13  11   66.52    4.42
 -10 -10  11  280.07    5.12
  -1  16  11   10.33    4.60
  -2  18  11   -0.09    4.04
 -13 -12  10  100.05    4.24
  -7  -8  10   96.93    4.05
  -6  -7  10   43.84    3.83
  -5  -6  10  103.81    4.20
 -15 -13   9    5.77    4.26
 -13 -12   9   68.82    4.00
 -11 -11   9   23.15    4.05
  -8  -9   9   31.10    3.63
  -1  17   9    1.17    4.54
  -2  19   9   17.02    4.88
 -15 -13   8    8.20    4.18
  -3  -4   8    6.54    3.13
   1  10   8    8.98    3.62
   0  15   8   62.11    4.34
 -15 -13   7    7.08    4.27
  -9 -10   7  232.18    4.54
  -1  -1   7  138.25    5.74
  -2  -3   6  348.00    6.69
  -1  18   6   21.00    4.34
 -12 -12   5   -4.83    3.91
   1  13   5    3.97    3.32
   0  16   5   24.13    4.01
  -2  20   5   20.21    4.74
 -12 -12   4    0.66    3.92
  -6  -8   4    7.83    3.69
  -5  -7   4    3.03    3.81
  -4  -6   4  113.56    4.11
  -2  20   4   14.85    4.71
 -12 -12   3   11.85    3.99
  -6  -8   3    7.21    3.58
  -5  -7   3  265.40    5.36
  -4  -6   3  827.67    7.87
  -2  20   3   64.02    4.81
 -12 -12   2    1.64    3.98
  -6  -8   2   34.92    3.86
  -4  -6   2   78.31    3.88
   1  14   2    8.84    3.31
 -15 -13   1   -8.44    4.31
  -6  -8   1    6.36    3.58
  -4  -6   1  777.80    7.88
   1  14   1   26.69    3.40
 -15 -13   0   39.09    4.49
  -6  -8   0   49.49    3.96
  -5  -7   0  314.63    5.61
  -4  -6   0  305.03    5.55
   1  14   0   -0.71    3.23
  -5  -7  -1   -1.12    3.75
  -4  -6  -1  215.67    4.97
   1  14  -1   -4.66    3.22
  -2  20  -1   20.59    4.61
 -16 -13  -2    6.90    4.18
 -13 -12  -2   58.67    4.11
  -9 -10  -2  145.30    4.28
   1  14  -2   -1.01    3.20
  -2  20  -2   48.01    4.79
 -16 -13  -3   13.07    4.12
 -11 -11  -3    4.37    4.12
  -2  20  -3   -2.80    4.54
  -8  -9  -4   -0.06    3.49
   1  13  -4    3.80    3.26
   0  16  -4    8.08    3.82
  -1  18  -4   19.79    4.25
   1   4  -5  155.36    4.82
   1  13  -5   25.76    3.39
   0  16  -5   20.39    3.92
  -1  18  -5   54.20    4.39
 -15 -12  -6    8.42    4.25
   1  12  -6   70.36    3.79
   1  11  -7  276.92    4.75
   0  15  -7   75.88    4.24
  -2  19  -7    3.90    3.91
   1   7  -8    2.68    3.52
   1   8  -8 1076.52    7.83
   1   9  -8    7.21    3.58
   1  10  -8   68.27    3.80
  -1  17  -8   12.22    4.35
   0   3  -9  621.48    7.95
   0  14  -9  279.73    5.04
  -2  18  -9    6.99    3.96
   0  13 -10    2.09    3.94
  -1  16 -10   12.53    3.54
   0   5 -11  178.17    4.82
   0  12 -11   74.75    3.67
  -1  15 -11    4.86    3.73
  -2  17 -11   14.96    4.20
 -12  -9 -12   84.08    4.47
 -10  -8 -12   28.14    4.24
   0   7 -12   12.10    3.48
   0   8 -12  108.12    4.05
   0   9 -12   26.76    3.52
   0  10 -12  143.41    4.03
  -1  14 -12  170.69    4.44
  -3  18 -12   14.13    4.56
  -1  13 -13   11.06    3.88
 -14  -9 -14    3.57    4.32
  -2   2 -14  280.32    6.11
  -1  11 -14    2.34    3.99
  -3  16 -15   12.47    3.95
  -3   2 -16    0.44    3.39
  -2   5 -16    0.81    3.35
  -2  12 -16  188.80    4.59
  -3  15 -16   15.04    4.18
  -3  13 -17  102.24    4.74
  -3   6 -18    2.98    4.14
  -3  11 -18    0.49    3.61
  -4  14 -18   23.94    4.06
  -4  12 -19   64.12    4.47
  -5  13 -20   43.94    4.71
  -5   7 -21   40.41    3.81
  -5   9 -21   10.79    4.26
  -5  10 -21    8.63    4.04
  -6   6 -22    8.10    4.31
  -6  10 -22   -5.79    4.00
  -6  11 -22   -1.11    4.60
  -7   6 -23   31.70    4.37
  -9   4 -24   26.65    5.04
  -8   7 -24   -3.48    4.67
  -5  11  24    9.18    8.40
  -7   5  27   16.33    7.62
  -3   3  19   -0.09    6.00
  -2  -1 -10    1.37    5.03
  -5  -4 -12   10.34    6.23
  -7   0 -20    0.08    6.66
  -8   0 -21   -0.62    6.42
 -10   1  29   -3.39    6.80
 -12  -3  28   40.64    6.79
  -8   4  28   44.71    6.47
  -9   0  27    0.27    6.10
  -8   2  27   50.94    6.56
 -14  -7  25   10.48    6.50
 -13  -7  24   44.63    5.88
  -6   2  24   16.79    5.78
 -11  -6  23   19.60    6.35
 -10  -5  23  131.89    5.90
  -9  -4  23    5.00    5.49
  -4  12  22    0.33    6.07
  -7  -3  21   13.03    5.88
  -4   3  21  112.95    7.09
  -4  14  21    0.35    6.86
 -13  -9  20    5.33    6.07
  -3  12  20   25.05    6.69
 -14 -10  19   28.83    5.95
  -6  -3  19    0.25    4.89
  -3  14  19   13.93    6.43
  -8  -6  18  162.04    5.95
  -2  11  18   16.92    5.72
 -14 -11  16    5.46    5.90
  -4  -2  16   34.38    5.36
  -1   9  16    1.65    4.80
  -5  -4  15  172.34    5.86
  -1  12  15   57.90    6.15
 -13 -11  14   79.66    5.43
  -7  -7  13   17.58    4.91
  -6  -6  13   55.69    5.29
  -9  -9  12   66.88    4.95
  -4  -4  12   73.90    5.53
  -3  -3  11   25.12    4.34
   0  13  11   23.91    5.90
 -16 -13  10   89.30    6.06
   0  14  10    1.83    5.80
  -4  -5   9  493.13    7.48
 -13 -12   8  109.92    5.77
 -11 -11   8    2.83    5.62
  -8  -9   8    9.41    4.79
   1   6   8  193.41    7.10
   1  11   8   13.18    5.00
   1   5   7    9.27    4.39
   1  12   7  193.33    5.78
  -1  18   7   -6.50    6.03
 -15 -13   6   31.06    6.17
  -9 -10   6   50.00    5.02
   0  16   6   56.56    5.69
 -15 -13   5   18.01    6.09
 -15 -13   4   -0.78    6.07
 -15 -13   3   34.13    6.12
   1   3   3  179.03    7.68
   1  14   3  169.80    5.91
 -15 -13   2   31.46    6.06
  -5  -7   2  202.17    6.18
   0  17   2   15.57    5.41
  -1  19   2   34.61    6.00
  -5  -7   1   43.10    5.41
   0  17   1   14.72    5.41
  -1  19   1   46.31    5.95
   0  17   0   -3.12    5.37
  -1  19   0   -2.74    5.83
 -13 -12  -1   -6.18    5.42
  -9 -10  -1  139.82    5.44
   0  17  -1   14.88    5.45
  -1  19  -1   61.83    5.90
 -11 -11  -2    0.18    5.87
   0  17  -2   20.86    5.45
   1   3  -3   -3.46    4.75
   1  14  -3   34.88    4.66
 -14 -12  -4   97.43    6.70
 -12 -11  -5    9.85    5.62
 -10 -10  -5   33.26    5.43
  -6  -7  -6   -1.24    5.09
   0  16  -6   62.54    5.47
  -1  18  -6   44.78    6.09
 -16 -12  -7    2.66    6.68
 -13 -11  -7   -8.90    5.31
  -9  -9  -7   48.53    5.10
   1   5  -7    4.43    4.09
   1  12  -7  258.55    5.69
   1  11  -8   22.68    4.86
   0  15  -8   63.04    5.63
  -2  19  -8   17.43    6.49
 -12 -10  -9   48.22    5.72
 -10  -9  -9    4.72    5.83
  -7  -7  -9   -0.97    4.90
  -2  18 -10    5.80    5.60
  -8  -7 -11   28.68    5.00
  -6  -5 -12  211.08    7.40
 -13  -9 -13   42.85    6.48
 -11  -8 -13   38.96    5.71
  -2   1 -13  287.62    7.65
  -2  16 -13   -0.78    5.82
 -10  -7 -14   11.71    5.70
  -1   5 -14   12.88    4.95
  -1  12 -14   68.14    5.69
  -2  15 -14   40.68    6.04
  -3  17 -14   38.28    6.70
 -13  -8 -15   27.71    6.28
  -2   3 -15   85.23    5.54
  -1   9 -15  254.03    5.67
  -2  14 -15  141.33    6.50
 -12  -7 -16    0.35    6.17
  -4   0 -16  548.89   10.17
  -4   1 -17  153.52    6.24
  -2   8 -17   10.19    5.66
  -2   9 -17   33.04    5.61
  -3  14 -17   16.93    5.95
  -3   5 -18    2.92    4.53
  -3  12 -18   11.51    6.05
  -4   4 -19  288.94    7.23
  -4  13 -19   26.83    5.77
  -4   7 -20   -0.04    5.33
  -4   8 -20   24.31    5.38
  -4   9 -20   16.49    5.11
  -4  10 -20   70.32    6.21
  -6   3 -21   -0.47    5.25
  -5   6 -21   30.51    5.38
  -5  11 -21   43.52    5.84
  -7   3 -22   42.01    5.92
  -8   3 -23   31.09    6.23
 -10   2 -24   63.20    6.93
  -8   6 -24    3.74    6.51
  -9  -1  26   41.67    4.79
 -12  -6  24   -0.13    4.34
  -9  -3  24   12.89    3.91
  -7   0  24  249.02    5.71
 -14  -8  23    3.96    4.00
 -13  -8  22   10.21    4.28
  -7  -2  22   -0.82    4.09
 -14  -9  21   23.55    4.14
 -11  -7  21  243.33    4.87
  -8  -4  21   28.27    4.14
 -15 -10  20    5.66    4.04
 -11  -8  19   -4.62    3.87
 -12  -9  18   16.32    3.81
 -15 -11  17    7.13    4.20
 -13 -10  17   67.21    4.59
 -10  -8  17    1.54    3.93
  -2  15  16    7.25    4.44
 -16 -12  15    6.86    4.66
 -12 -10  15  124.32    4.36
  -9  -8  15   49.91    3.61
  -2  16  15   -0.69    4.28
 -10  -9  14   93.07    4.39
  -4  -3  14  287.60    5.61
  -1  14  14   60.16    4.35
 -15 -12  13    5.06    4.22
 -11 -10  13  161.02    4.61
  -3  -2  13  140.91    4.95
   0   9  13    1.21    3.47
  -1  15  13   16.85    3.97
 -17 -13  12    1.19    4.56
  -8  -8  12   20.66    3.53
   0  12  12    4.95    4.24
  -2  18  12   -0.50    4.08
 -17 -13  11   -3.60    4.56
 -14 -12  11    5.06    4.33
 -12 -11  11    1.51    3.88
 -10 -10  10    3.14    3.23
  -1  17  10   27.33    4.59
  -2  19  10   11.45    4.79
 -16 -13   9   40.14    4.30
  -7  -8   9   -2.37    3.61
  -6  -7   9    7.19    3.54
  -5  -6   9   -0.89    3.59
  -2  -2   9  186.32    5.36
   1   9   9 1176.87   10.09
   0  15   9   93.30    4.50
 -16 -13   8  109.40    4.45
  -1  18   8    5.13    4.28
 -13 -12   7  140.45    4.38
 -11 -11   7    9.24    4.08
  -8  -9   7   69.35    3.79
   0  16   7   -1.64    3.89
 -13 -12   6   13.91    3.81
 -11 -11   6   40.41    4.09
   1  13   6   43.06    3.65
  -9 -10   5   60.35    3.73
  -9 -10   4  109.08    4.01
   1  14   4   31.45    4.31
   0  17   4  116.10    4.26
  -1  19   4   40.05    4.28
  -9 -10   3   31.43    3.62
   0  17   3   16.83    3.79
  -1  19   3   68.56    4.47
  -9 -10   2    3.08    3.46
 -13 -12   1   49.70    4.06
  -9 -10   1   -1.77    3.43
   1  15   1   24.85    4.12
 -16 -13   0   18.18    4.09
 -13 -12   0   12.68    3.81
  -9 -10   0   69.04    3.80
   2   9   0   -1.34    3.53
   1  15   0    2.58    3.90
 -16 -13  -1    0.13    4.11
 -11 -11  -1   -2.01    4.06
   1  15  -1   45.49    4.11
  -1  19  -2   11.77    4.06
 -17 -13  -3   62.35    5.03
 -14 -12  -3    4.25    4.52
  -8  -9  -3   68.30    3.96
   0  17  -3   11.77    3.81
  -1  19  -3   49.63    4.26
  -2  -3  -4   59.56    4.66
   1  14  -4   -0.62    4.07
   0  17  -4  115.95    4.14
  -1  19  -4    6.86    3.99
 -15 -12  -5    4.51    4.25
  -7  -8  -5    6.80    3.50
   1  14  -5  155.55    4.66
   1   4  -6   58.63    3.70
   1  13  -6   25.41    3.38
 -11 -10  -7  118.35    4.71
   1  13  -7   29.63    3.36
   0  16  -7    7.10    3.73
  -1  18  -7   12.09    4.20
 -14 -11  -8   19.37    4.37
  -8  -8  -8   10.07    3.49
   0   2  -8   16.01    3.27
   1   6  -8  232.59    4.64
   1  12  -8    1.21    3.34
 -15 -11  -9   -2.50    4.09
   1   7  -9   92.60    4.10
   1   8  -9   46.40    3.85
   1   9  -9  493.87    5.67
   1  10  -9   11.56    3.37
   0  15  -9   84.75    4.18
  -1  17  -9   -4.17    4.15
  -2  19  -9   35.30    4.79
 -16 -11 -10    2.56    4.70
 -13 -10 -10    3.84    4.50
  -9  -8 -10   37.80    3.64
   0  14 -10    2.29    3.88
   0  13 -11   27.37    3.90
  -1  16 -11    8.28    4.38
  -2  18 -11    5.64    3.87
 -15 -10 -12   12.29    4.31
   0   6 -12   49.13    3.77
   0  11 -12  105.14    3.79
  -1  15 -12   26.33    3.74
  -2  17 -12   12.11    3.94
  -1  14 -13   45.05    3.83
 -12  -8 -14   33.39    4.06
  -1  13 -14  137.16    4.32
  -1   7 -15  136.66    4.14
  -1   8 -15   23.58    3.45
  -1  10 -15    3.39    3.95
  -1  11 -15   36.83    4.08
  -2  13 -16   -2.34    3.59
  -3   3 -17   31.38    3.67
  -2   7 -17    9.07    3.22
  -2  10 -17    6.53    3.73
  -2  11 -17   29.96    3.91
  -3  13 -18   58.53    4.41
  -4  15 -18    2.91    4.46
  -4  14 -19    9.30    4.80
  -4   6 -20   29.04    3.97
  -4  11 -20   18.40    4.35
  -5  12 -21   31.09    4.72
  -6   5 -22    5.08    4.36
  -7   5 -23   -2.48    4.25
  -3   5  20    8.56    8.69
  -6   4  25   67.10    7.40
  -4   5  22  224.86   10.45
  -1   8  16    3.90    6.04
  -6  -1 -18    0.23    7.07
 -12  -5 -19   37.04    7.84
  -6   0 -19   -2.79    6.91
  -9   0 -22    2.07    7.41
  -9   4  29   -1.59    6.70
 -10   0  28   15.97    5.91
  -7   3  26    5.52    6.34
 -13  -6  25   15.59    5.70
  -9  -2  25   19.26    5.49
 -11  -5  24    3.80    6.24
 -10  -4  24   59.75    5.60
  -7  -1  23   -1.46    5.64
  -6   1  23  230.53    7.28
 -15  -9  22   -3.23    6.48
 -12  -7  22    3.66    6.21
 -10  -6  21    7.19    5.55
  -9  -5  21   34.62    5.70
 -12  -8  20  145.62    5.76
  -6  -2  20   32.06    4.94
 -10  -7  19   13.67    5.59
  -7  -4  19   30.30    4.96
 -16 -11  18   48.19    6.67
 -14 -10  18   -8.25    5.97
  -5  -2  18   -0.76    4.92
  -3   2  18   45.27    5.59
  -2  12  18    2.79    5.52
  -6  -4  17    9.42    4.97
  -4  -1  17   62.54    5.44
  -3   1  17   34.12    5.39
  -2  14  17  161.95    7.34
 -11  -9  16   23.14    5.58
  -3   0  16  424.88    8.29
  -1  10  16    2.25    5.91
 -14 -11  15    8.28    6.06
  -8  -7  15    1.54    4.81
  -7  -6  15    7.16    4.84
  -6  -5  15  100.98    5.47
 -16 -12  14    2.57    5.64
  -2  17  14   -1.63    5.86
 -13 -11  13   39.22    5.52
  -2   0  13   -0.99    5.25
   0   8  13   19.90    5.22
   0  10  13    1.97    4.86
 -15 -12  12   31.34    6.07
  -5  -5  12    6.61    5.11
  -1  16  12    5.64    6.38
  -9  -9  11   36.17    4.78
 -17 -13  10   -0.51    6.59
 -14 -12  10   16.04    6.16
 -12 -11  10   31.82    5.52
 -10 -10   9   98.61    5.10
   1   8   9  173.98    6.55
   1  10   9   12.27    5.07
  -7  -8   8  518.44    6.86
  -4  -5   8   19.52    4.30
   1  12   8   -1.33    4.82
 -16 -13   7   -5.01    5.87
  -3  -4   7  429.98    7.09
   1  13   7    8.03    4.82
 -16 -13   6   47.68    5.96
   1   4   6    0.48    4.33
 -13 -12   5   72.79    5.66
 -11 -11   5   -5.80    5.73
  -2  -3   5    3.62    4.46
   1  14   5  187.52    6.54
   0  17   5   29.37    5.39
  -1  19   5   42.86    6.01
 -13 -12   4   21.50    5.33
 -11 -11   4   25.04    5.85
 -13 -12   3   38.29    5.50
 -16 -13   2   11.02    5.91
 -13 -12   2    1.67    5.50
 -11 -11   2   45.97    5.90
   1  15   2   26.12    5.75
 -16 -13   1   16.38    5.97
 -11 -11   1   10.24    5.77
   2   8   1   75.86    5.53
   2   9   1    0.91    5.05
   2  10   1  420.54    6.87
 -11 -11   0   16.05    5.77
   2   8   0   -2.07    5.17
   2  10   0   -0.05    5.06
   2   8  -1   88.16    5.55
   2   9  -1   23.88    5.17
   2  10  -1  277.79    6.09
 -17 -13  -2   16.91    6.68
  -8  -9  -2   83.43    5.42
   2   8  -2  207.44    6.07
   2   9  -2   26.34    5.12
   1  15  -2   14.45    5.62
   1  15  -3   20.53    5.55
 -12 -11  -4    7.06    5.56
 -10 -10  -4   22.51    4.77
   1   3  -4  142.76    6.06
   0  17  -5   25.68    5.27
 -16 -12  -6   15.82    5.85
 -13 -11  -6    2.34    5.35
  -9  -9  -6    1.89    4.80
  -5  -6  -6  112.35    5.97
  -4  -5  -6   64.99    4.90
   0   1  -6   40.43    5.25
  -1  18  -8    7.33    5.76
   1  11  -9   21.49    4.73
 -11  -9 -10   26.69    5.76
  -1  17 -10   36.91    6.05
 -14 -10 -11   94.61    6.59
   0  12 -12    0.24    5.63
   0   8 -13   17.74    4.88
   0   9 -13    2.49    4.67
 -15  -9 -14   -0.01    6.69
  -2  16 -14    4.92    5.69
 -11  -7 -15  214.77    7.15
  -2  15 -15   12.05    5.98
  -3  17 -15   81.44    6.45
 -15  -8 -16    5.75    6.52
  -2   4 -16   58.75    5.13
  -3  16 -16    4.17    6.55
  -2   6 -17  237.66    5.81
  -3  15 -17   22.30    5.57
  -4   2 -18   51.85    5.08
  -3   7 -19  139.84    6.06
  -3   8 -19   -2.56    5.40
  -3   9 -19   57.33    5.46
  -3  10 -19   18.80    5.17
  -5   3 -20   11.60    5.53
  -4  12 -20   11.32    5.73
  -7   1 -21   32.23    5.64
  -5   5 -21   15.53    5.23
  -9   3 -24    7.45    5.72
  -8   5 -24    3.04    5.53
 -11   0  29    1.68    4.68
  -9   2  28    4.46    4.20
 -10  -1  27    6.03    4.33
 -13  -5  26   -3.36    4.84
 -10  -2  26   13.36    4.35
  -8   1  26    7.12    4.62
 -12  -5  25   25.30    4.27
 -11  -4  25   38.16    4.55
 -10  -3  25   37.42    4.72
 -13  -7  23   80.35    4.66
 -11  -6  22   16.06    3.90
  -8  -3  22    3.33    4.07
 -13  -8  21   11.30    4.31
 -16 -10  20    1.93    4.60
 -15 -10  19   32.70    4.25
 -13  -9  19   10.00    4.46
  -9  -6  19  125.29    4.63
  -8  -5  19   65.45    4.48
 -11  -8  18   10.72    3.97
  -3  16  18    7.62    4.92
  -9  -7  17  168.08    4.85
  -8  -6  17   37.30    3.61
  -7  -5  17   -2.05    3.39
 -15 -11  16    6.16    4.10
 -13 -10  16   92.16    4.14
 -17 -12  15   -0.29    4.52
  -1  13  15   74.04    4.61
 -14 -11  14   -1.07    4.35
 -12 -10  14   34.83    3.98
  -9  -8  14    7.88    3.40
 -10  -9  13   12.37    4.02
  -2  18  13   13.33    4.85
 -13 -11  12  122.29    4.27
 -11 -10  12   33.90    4.18
  -7  -7  12   11.11    3.61
  -6  -6  12   61.03    3.99
   0  13  12   20.90    4.20
 -15 -12  11   -2.39    4.19
   0  14  11    5.58    3.96
  -1  17  11   -4.24    4.35
  -9  -9  10   75.57    3.73
   0  15  10   -1.36    3.92
 -17 -13   9   11.79    4.80
 -14 -12   9    2.96    3.59
 -12 -11   9    1.06    3.90
   1   7   9   11.35    3.82
   1  11   9   17.75    3.60
  -1  18   9    3.12    4.19
 -14 -12   8   -2.03    3.67
 -10 -10   8    1.91    3.33
  -6  -7   8  185.45    4.59
  -5  -6   8    2.18    3.63
   0  16   8   33.18    4.00
  -7  -8   7  115.73    4.24
  -8  -9   6   37.51    3.67
   1  14   6   63.42    4.45
   0  17   6   69.19    4.17
  -1  19   6   27.16    4.32
 -16 -13   5    7.89    4.16
  -8  -9   5  250.22    4.78
 -16 -13   4   29.67    4.18
   1  15   4   -2.54    4.06
 -16 -13   3   22.59    4.21
 -11 -11   3   -0.43    4.08
   2   9   3   97.23    4.43
   1  15   3   25.90    4.18
   2   8   2  382.49    6.06
   2   9   2    7.65    3.63
   2  10   2  145.07    4.47
   0  18   2   59.44    4.60
   2   7   1   23.32    3.21
   2  11   1  200.50    4.70
   0  18   1    4.75    4.50
 -17 -13   0   19.13    4.79
   2   7   0   13.60    3.07
   2  11   0   95.05    4.07
   0  18   0  234.07    5.34
 -17 -13  -1   32.04    4.92
 -14 -12  -1   29.31    3.87
  -8  -9  -1  194.66    4.63
   2   7  -1   -0.44    2.95
   2  11  -1    3.96    3.54
   0  18  -1   15.33    4.39
 -14 -12  -2   83.44    4.25
   2   7  -2  163.82    4.36
   2  10  -2  227.36    4.76
   2  11  -2  129.06    4.19
   0  18  -2   61.74    4.51
 -12 -11  -3   -1.49    3.97
 -10 -10  -3    5.28    3.36
   2   8  -3  208.78    4.94
   2   9  -3   37.20    3.91
   2  10  -3    7.43    3.56
 -15 -12  -4   -0.07    4.42
  -7  -8  -4  100.73    4.26
   2   9  -4  125.17    4.22
   2  10  -4  150.44    4.35
   1  15  -4   13.21    3.91
  -6  -7  -5  436.66    6.45
   1  15  -5    2.61    3.93
  -1  19  -5    3.89    4.07
 -11 -10  -6  132.48    4.80
   1  14  -6  173.23    4.70
   0  17  -6   69.57    3.97
  -1  19  -6   23.76    4.10
 -14 -11  -7   21.49    4.52
   1  14  -7  390.22    5.52
 -12 -10  -8    9.50    3.96
   1   5  -8  186.86    4.60
   1  13  -8  114.65    3.80
   0  16  -8   37.02    3.85
  -6  -6  -9    1.23    3.54
   1   6  -9  159.77    4.66
   1  12  -9   17.83    3.38
  -1  18  -9    8.52    4.09
   0   3 -10   20.96    3.15
   1   8 -10  192.38    4.50
   1   9 -10   -0.68    3.39
   1  10 -10    6.41    3.34
   0  15 -10    0.18    3.81
  -2  19 -10   10.76    4.51
   0   4 -11   11.32    3.68
   0  14 -11    4.63    3.82
  -1   2 -12  153.36    5.19
   0   5 -12  383.86    5.89
   0  13 -12    8.92    3.99
  -1  16 -12    3.16    4.27
  -2  18 -12    8.53    4.64
  -1   3 -13  284.23    5.82
   0   7 -13    2.43    3.44
   0  10 -13   -0.07    3.25
   0  11 -13   79.19    3.56
  -1  15 -13    9.43    3.67
  -2  17 -13   67.88    4.22
  -1   4 -14   22.83    3.69
  -1  14 -14  110.41    4.15
  -1   6 -15  140.06    4.30
  -1  12 -15   -4.54    3.75
  -2  14 -16   59.56    4.52
  -2  12 -17   -3.25    3.67
  -3  14 -18    4.42    4.05
  -3  11 -19   33.61    4.45
  -4  13 -20    2.57    3.92
  -5   9 -22   29.35    4.26
  -6   8 -23   -0.94    4.02
  -6   9 -23   74.44    4.47
  -6  10 -23   20.03    4.61
 -10  -2 -21   12.73   10.88
   0   4  11   10.87    7.84
  -5  12  24   26.41    8.71
  -1   1  11   21.14    5.58
  -8  -5 -15   20.59    7.30
 -10  -1 -22    7.73    7.38
  -8   1 -22   20.56    7.68
 -11  -1  28   12.83    5.83
 -12  -4  26   78.96    6.22
 -11  -3  26   71.80    6.41
 -14  -7  24    9.75    6.31
 -14  -8  22   47.57    5.97
 -10  -5  22    4.92    5.54
  -9  -4  22   87.37    6.00
  -6   0  22   20.39    5.94
  -5   2  22    2.01    5.81
  -4  13  22    0.86    5.94
  -6  -1  21   64.74    6.34
 -14  -9  20   12.25    5.81
 -11  -7  20   46.62    5.61
  -4   2  20    2.00    4.83
  -3  13  20    8.04    6.24
  -5  -1  19   57.46    5.37
  -3  15  19    1.41    5.80
  -4   0  18  323.58    7.37
 -16 -11  17   -2.37    6.23
 -12  -9  17    0.95    5.34
 -10  -8  16   44.21    5.91
  -5  -3  16  122.26    5.77
  -1  11  16    2.40    5.83
 -11  -9  15   33.56    5.67
  -5  -4  14  173.48    5.96
 -16 -12  13   -1.61    5.76
   0   7  13   -1.32    5.17
   0  11  13   70.02    5.40
 -11 -10  11  116.29    6.06
  -8  -8  11   19.18    4.91
  -4  -4  11  108.36    5.73
  -2  -1  11  193.47    6.27
  -3  -3  10  462.67    7.28
  -1   0   9   -0.91    4.33
   0  16   9   -0.71    5.36
 -17 -13   8    3.34    6.23
 -12 -11   8   52.79    5.70
   1  13   8  134.36    5.99
 -17 -13   7    5.57    6.21
 -14 -12   7   -7.22    5.26
 -10 -10   7   35.45    4.86
   0  17   7   69.69    6.61
  -1  19   7   -7.03    5.86
   1  15   5   12.96    5.80
  -8  -9   4   58.88    5.29
   1   3   4    8.63    4.71
  -8  -9   3  223.16    5.91
   2   8   3  217.34    6.46
   2  10   3  112.33    5.57
   0  18   3   -5.21    6.11
  -1  20   3    1.20    6.52
   2   7   2   21.60    4.36
   2  11   2   21.15    5.06
  -1  20   2   -6.47    6.53
 -17 -13   1   -0.49    6.19
  -8  -9   1    3.64    4.90
   1  16   1    1.27    5.48
  -1  20   1    2.89    6.53
 -14 -12   0   26.48    5.40
  -8  -9   0   -3.53    4.99
   2  12   0  136.34    5.46
   1  16   0   -6.38    5.49
  -1  20   0    3.17    6.54
   2  12  -1  293.71    5.96
   1  16  -1   12.62    5.34
  -1  20  -1   -0.89    6.60
 -12 -11  -2   25.01    5.74
   1  16  -2    9.76    5.46
  -1  20  -2   25.01    6.51
 -15 -12  -3    7.58    6.13
  -7  -8  -3   -0.18    5.07
   2   7  -3    8.92    4.14
   2  11  -3  338.17    6.17
   0  18  -3   -7.07    5.99
   2   8  -4  298.66    6.43
   0  18  -4   -8.59    6.02
 -16 -12  -5   12.93    5.94
 -13 -11  -5   -8.14    5.51
  -3  -4  -5    9.45    4.29
 -17 -12  -6   -0.81    6.53
  -8  -8  -7   31.80    5.07
   1   4  -7  577.00    7.90
   0  17  -7   57.74    6.33
  -1  19  -7   -1.22    5.51
 -15 -11  -8   -0.39    5.95
 -10  -9  -8  137.67    6.49
 -16 -11  -9   -1.57    6.25
   0  16  -9   -3.09    5.19
   1   7 -10   22.12    5.03
   1  11 -10    8.00    4.66
 -12  -9 -11   67.70    5.86
 -10  -8 -11   17.70    5.75
  -1  17 -11   -7.58    5.88
 -16 -10 -12   15.02    6.65
 -13  -9 -12   19.88    6.29
  -2   0 -12   12.60    5.32
 -14  -9 -13    1.22    6.00
  -8  -6 -13   59.27    5.29
   0  12 -13   18.32    5.61
  -4  -1 -15    2.68    4.93
  -1  13 -15  116.29    5.55
  -2  16 -15    1.74    5.75
  -1   8 -16   10.89    4.61
  -1   9 -16   -9.70    5.66
  -1  10 -16    1.40    5.48
 -14  -7 -17   39.65    6.50
  -2  13 -17   22.94    6.10
  -3   4 -18    4.94    4.72
  -2   9 -18   14.13    5.43
  -2  10 -18   -5.78    5.37
  -4   3 -19    3.14    5.76
  -3   6 -19    8.04    5.57
  -3  12 -19    6.46    5.96
  -6   1 -20   -0.42    5.56
  -4   5 -20   13.91    5.43
  -4   9 -21   14.59    6.14
  -6   4 -22   31.25    5.41
  -5   7 -22    6.52    6.04
  -5   8 -22    8.80    5.86
  -5  10 -22   14.90    5.73
  -5  11 -22   15.96    6.13
  -7   4 -23  155.06    6.96
  -6   7 -23   63.62    6.04
  -7   8 -24  115.25    6.94
 -10   2  29   22.46    5.07
 -12  -2  28   14.07    4.65
 -13  -4  27   37.26    4.95
 -12  -3  27   11.42    4.29
 -11  -2  27   45.26    4.58
  -8   0  25    0.92    3.84
  -8  -1  24    2.91    3.97
 -15  -8  23   -9.47    4.66
 -12  -6  23    1.27    4.31
  -8  -2  23    2.44    3.93
 -15  -9  21    8.23    4.05
 -12  -7  21    1.51    3.68
  -5   1  21   13.58    3.46
 -10  -6  20   26.80    4.16
  -7  -3  20  167.74    4.50
  -5   0  20  240.76    5.53
 -12  -8  19   40.77    3.96
 -15 -10  18    4.42    4.21
 -13  -9  18    6.19    4.43
 -10  -7  18   18.19    4.10
  -6  -3  18   28.87    3.63
  -2  13  18   57.70    5.11
 -14 -10  17    5.71    4.29
 -16 -11  16   14.08    4.08
  -9  -7  16   11.80    3.33
  -2  16  16   -1.96    4.20
 -15 -11  15    9.08    4.27
 -13 -10  15   60.99    3.98
  -2  17  15   48.75    4.43
 -17 -12  14   -2.22    4.62
  -8  -7  14  182.76    4.38
  -7  -6  14   28.92    3.63
  -6  -5  14    3.05    3.53
  -1  15  14  163.88    5.45
 -14 -11  13    0.58    4.47
 -12 -10  13  347.25    5.26
  -9  -8  13  256.16    4.63
   0  12  13   18.80    4.22
  -1  16  13   -1.33    4.45
 -16 -12  12    8.21    3.96
 -10  -9  12   62.84    3.60
  -1  17  12   10.58    4.25
 -13 -11  11   -1.81    3.81
  -7  -7  11   34.04    3.64
  -5  -5  11   29.95    3.84
 -15 -12  10   50.44    4.48
 -11 -10  10   19.60    4.06
  -8  -8  10    4.42    3.46
  -1  18  10    4.54    4.22
 -15 -12   9   32.16    4.46
  -9  -9   9  204.75    4.40
   1  12   9   56.80    3.91
  -1  19   8   16.96    3.99
 -12 -11   7   17.62    3.93
  -6  -7   7    5.86    3.63
  -5  -6   7  113.36    4.45
  -4  -5   7  375.44    5.76
   1  14   7  106.32    4.68
 -17 -13   6   17.90    3.94
 -14 -12   6    5.18    3.65
 -12 -11   6   66.31    4.28
 -10 -10   6   33.05    3.43
  -7  -8   6  554.64    6.10
  -3  -4   6   18.18    3.25
  -1  -1   6  159.93    6.31
   1  15   6  142.03    4.72
 -17 -13   5    6.16    3.96
 -14 -12   5   15.41    3.80
  -7  -8   5  241.30    4.96
   0  18   5   21.79    4.35
  -1  20   5    3.55    4.69
 -17 -13   4    7.34    3.94
 -14 -12   4    7.71    3.72
  -2  -3   4  130.23    5.04
   2   9   4   42.18    3.98
   2  10   4  139.10    4.52
   0  18   4    5.31    4.34
  -1  20   4   10.62    4.74
 -17 -13   3   -0.97    4.15
 -14 -12   3    3.47    3.73
   2  11   3   60.64    3.98
   1  16   3   49.14    4.04
 -17 -13   2   24.34    4.06
 -14 -12   2    9.79    3.70
  -8  -9   2   40.45    3.75
   2  12   2   47.62    3.73
   1  16   2   11.51    3.85
 -14 -12   1   75.33    4.11
   2  12   1  215.86    4.60
   2   6   0  447.84    6.75
 -12 -11  -1    8.52    3.95
 -10 -10  -1  165.35    4.20
   2   6  -1 2183.89   12.92
 -15 -12  -2    6.14    4.33
 -10 -10  -2   84.13    3.86
   2   6  -2  567.28    7.18
   2  12  -2   98.24    4.00
   2  12  -3  199.90    4.41
   1  16  -3   56.70    4.10
  -1  20  -3   10.01    4.52
 -16 -12  -4   34.80    4.24
  -6  -7  -4   28.94    3.91
   2   7  -4   40.66    3.28
   2  11  -4   14.61    3.64
   2  12  -4   -1.52    3.41
   1  16  -4   12.75    3.90
  -1  20  -4   39.36    4.59
 -11 -10  -5    1.83    4.09
  -9  -9  -5    1.05    3.44
  -5  -6  -5    1.25    3.64
   1   3  -5   55.51    3.99
   2   8  -5  388.97    5.68
   2   9  -5  248.05    4.87
   2  10  -5  350.64    5.16
   2  11  -5  672.96    6.21
   0  18  -5   11.08    4.28
  -1  20  -5   10.46    4.52
   1  15  -6   22.95    4.01
   1  15  -7   -6.67    3.94
  -7  -7  -8  130.99    4.69
   1  14  -8  388.67    5.48
   0  17  -8   -0.08    4.43
  -1  19  -8   10.81    4.54
 -13 -10  -9  174.29    4.88
   1  13  -9   25.81    4.10
 -14 -10 -10   -1.44    4.29
   1  12 -10   61.41    3.57
   0  16 -10   12.31    3.66
  -1  18 -10    2.16    3.97
 -15 -10 -11   15.16    4.23
   1   9 -11   51.77    3.67
   1  10 -11    5.58    3.31
   0  15 -11   48.13    3.78
  -9  -7 -12   40.74    4.50
   0  14 -12   10.15    3.86
  -1  17 -12    3.82    4.08
   0   6 -13   16.68    3.54
   0  13 -13   -0.75    3.84
  -1  16 -13   11.67    4.32
  -2  18 -13   16.34    4.63
   0   9 -14   11.36    3.38
   0  10 -14   98.24    3.72
  -1  15 -14   82.84    4.60
  -2  17 -14   -5.44    4.73
  -1   5 -15    5.70    3.43
  -1  14 -15   -6.58    3.61
  -1   7 -16   26.02    3.51
  -1  11 -16    1.02    3.89
  -1  12 -16   54.51    3.99
  -2  15 -16   22.27    4.16
  -2   5 -17  164.09    4.52
  -2  14 -17   79.14    4.55
  -3  16 -17   35.20    4.80
  -2   8 -18  161.14    4.71
  -2  11 -18    3.17    3.72
  -3  15 -18   24.90    4.59
  -3  13 -19   44.09    4.21
  -4  14 -20   13.14    4.52
  -5   4 -21   -0.04    3.72
  -4   8 -21   27.72    3.74
  -4  10 -21   20.26    4.27
  -4  11 -21   12.76    4.08
  -5  12 -22   20.69    4.65
  -7   7 -24   16.39    4.90
  -5   6  24   41.79    8.41
  -8   5  28    0.73    7.05
  -7   6  27    0.75    7.31
  -1   7  16   22.71    6.40
   0   5  12  408.62   12.69
 -13  -6 -18    6.58    7.02
  -9   1  27   70.07    6.60
  -8   3  27   15.82    6.30
 -14  -6  25   14.94    6.75
  -7   2  25   40.72    5.78
 -13  -6  24   13.21    5.88
 -11  -5  23   16.99    5.33
  -9  -3  23    2.01    5.59
  -9  -5  20   16.55    5.84
  -8  -4  20   56.97    6.07
 -16 -10  19   -1.84    6.68
 -14  -9  19    3.63    6.09
  -4   1  19   50.52    5.40
 -17 -11  17   -1.83    6.46
 -11  -8  17   38.22    5.65
  -2  15  17   13.32    6.16
 -12  -9  16  116.69    5.87
  -6  -4  16   46.05    5.21
  -1  12  16   44.40    6.04
 -10  -8  15    2.44    5.69
  -4  -2  15  420.30    7.49
  -1  14  15    7.64    5.42
 -11  -9  14   66.56    5.91
  -3  -1  14    6.02    5.18
  -2   1  14   67.59    6.11
  -2  18  14   24.80    6.71
 -17 -12  13   11.05    6.56
  -4  -3  13    3.45    5.18
  -3  -2  12   74.10    5.71
   0  14  12    9.93    5.74
 -16 -12  11   11.51    5.79
  -6  -6  11  215.06    6.01
   0  15  11   49.11    5.66
 -13 -11  10   38.75    5.53
   1   8  10   21.30    5.35
   1   9  10   44.70    5.49
   1  10  10   11.11    5.07
   1  11  10   26.45    5.04
   0  16  10   13.25    5.27
 -15 -12   8   49.21    6.35
  -9  -9   8   48.71    5.03
  -2  -2   8   77.62    5.30
   0  17   8   13.88    6.32
  -6  -7   6  335.49    6.56
   0  18   6   28.70    6.13
 -12 -11   5   14.13    5.71
 -10 -10   5  161.39    5.39
 -10 -10   4   55.56    4.97
   2   8   4    4.69    5.28
   2  11   4  110.32    5.46
   1  16   4   -2.17    5.49
   2   7   3  333.20    6.62
   2  12   3   37.19    4.97
   2   6   1 2150.59   13.72
   2  13   1   27.52    4.83
 -12 -11   0   -5.00    5.69
 -10 -10   0   38.21    4.90
   2  13   0   -2.35    4.72
   0  19   0    6.76    5.78
 -15 -12  -1    3.16    6.22
   2  13  -1   -4.75    4.73
   0  19  -1   -5.92    5.77
  -7  -8  -2  373.62    6.68
   2  13  -2   26.02    4.78
  -2  -3  -3  350.28    9.08
   2   6  -3  112.09    5.13
   2  13  -3    9.65    4.68
 -13 -11  -4    8.16    5.45
 -17 -12  -5   19.04    6.70
  -4  -5  -5   39.69    4.65
   2   7  -5   40.63    4.28
   2  12  -5   24.28    4.81
   1  16  -5  113.19    5.80
 -14 -11  -6   16.38    6.30
   2   8  -6   97.17    5.57
   2   9  -6   16.74    5.10
   2  10  -6    1.67    5.07
   2  11  -6   91.23    5.27
   0  18  -6   19.81    5.95
 -12 -10  -7   21.63    5.65
 -10  -9  -7   26.13    4.79
 -11  -9  -9    7.99    5.62
  -9  -8  -9  156.68    5.72
  -5  -5  -9   15.40    5.18
  -4  -4  -9  145.86    7.27
   1   5  -9   39.08    4.33
   1  14  -9   25.87    5.76
  -8  -7 -10  412.77    7.45
   1   6 -10   70.43    5.37
   1  13 -10   18.93    5.72
  -7  -6 -11  207.92    6.69
   1   8 -11  243.22    5.86
   1  11 -11    0.73    4.56
 -11  -8 -12   76.64    6.05
   0   8 -14  474.62    6.62
   0  11 -14  109.59    5.97
 -14  -8 -15    3.17    5.78
 -11  -5 -18   18.66    6.34
  -2   7 -18   14.36    5.61
  -2  12 -18   50.96    5.22
  -5   1 -19   33.59    6.08
  -3   5 -19    1.20    5.64
  -3   9 -20   29.95    5.27
  -3  10 -20   33.15    5.22
  -6   2 -21    4.61    5.36
  -4   7 -21    9.95    5.18
  -4  12 -21  103.51    5.95
  -7   2 -22   48.02    5.78
  -5   6 -22    3.35    5.09
  -9   1 -23   30.61    6.20
  -6   6 -23   39.65    6.10
  -8   4 -24   32.87    5.95
  -7   6 -24   11.88    5.62
  -9   0  26   30.70    4.65
 -15  -7  24   29.73    4.79
 -12  -5  24   20.39    4.38
  -9  -2  24   29.62    3.97
 -14  -7  23    1.52    4.18
 -10  -4  23   -3.34    3.90
 -15  -8  22    4.24    4.04
 -13  -7  22    4.27    4.30
 -16  -9  21    0.97    4.57
 -14  -8  21    5.56    4.18
 -11  -6  21   73.13    4.17
  -7  -2  21   34.46    4.36
 -15  -9  20   -8.61    4.03
 -13  -8  20   16.23    4.47
 -11  -7  19  289.57    5.17
  -9  -6  18   -3.05    4.19
  -8  -5  18   14.48    3.39
  -7  -4  18   69.34    3.83
 -15 -10  17   87.74    4.57
 -13  -9  17    0.69    3.87
 -14 -10  16   16.82    4.46
  -8  -6  16   87.44    3.87
  -7  -5  16   16.02    3.60
 -16 -11  15   14.24    4.01
 -15 -11  14   30.04    4.32
 -13 -10  14   63.78    4.08
  -8  -7  13   -0.25    3.44
 -17 -12  12    0.02    3.96
 -14 -11  12   -0.49    3.77
 -12 -10  12    3.58    3.99
 -10  -9  11    0.23    3.30
  -1  18  11    7.30    4.04
 -16 -12  10   -5.14    4.15
  -7  -7  10   84.67    4.01
  -4  -4  10   71.83    4.28
 -13 -11   9    4.55    3.93
 -11 -10   9   18.32    4.15
  -8  -8   9    0.46    3.49
   1  13   9    6.93    4.29
  -1  19   9   23.52    4.93
   1  14   8   71.25    4.59
 -15 -12   7   85.85    4.73
  -9  -9   7   88.39    3.92
   1  15   7    0.27    4.02
 -15 -12   6   22.01    4.49
  -5  -6   6   13.68    3.70
  -4  -5   6   18.41    3.11
 -18 -13   5   -2.87    4.48
  -6  -7   5  128.54    4.40
  -3  -4   5    7.96    3.07
   2   9   5  243.99    5.31
   2  10   5    4.41    3.55
   2  11   5   -0.73    3.53
   1  16   5   55.84    4.13
 -18 -13   4    2.65    4.60
 -12 -11   4    3.16    3.99
  -7  -8   4  560.19    6.13
   2  12   4   17.84    3.57
 -18 -13   3    4.73    4.56
 -12 -11   3   14.39    4.09
 -10 -10   3  154.96    4.15
  -7  -8   3  206.33    4.70
  -2  -3   3  168.04    5.49
   2  13   3   21.45    3.45
   0  19   3   12.25    4.24
 -12 -11   2    5.98    4.05
 -10 -10   2    7.69    3.48
  -7  -8   2   12.20    3.70
   2   6   2  100.60    4.28
   2  13   2   25.36    3.47
   1  17   2    7.39    3.81
   0  19   2   -3.26    4.22
 -15 -12   1    6.92    4.50
 -12 -11   1   13.17    4.10
 -10 -10   1  199.08    4.41
  -7  -8   1  183.96    4.66
   1  17   1  520.61    5.85
   0  19   1    3.18    4.09
 -15 -12   0    0.95    4.49
  -7  -8   0   42.28    3.86
   1  17   0    7.61    3.97
  -7  -8  -1   62.10    3.97
   2  14  -1    8.81    3.30
   1  17  -1  619.85    6.22
   1  17  -2   -1.24    3.87
   0  19  -2   12.91    4.04
 -16 -12  -3    4.21    4.23
 -13 -11  -3    6.66    3.94
  -6  -7  -3  888.64    8.20
   1  17  -3  113.63    4.29
   0  19  -3   15.84    4.10
 -17 -12  -4   20.51    4.86
 -11 -10  -4   14.97    4.05
  -9  -9  -4    3.51    3.48
   2   6  -4  119.93    4.13
   2  13  -4   34.69    3.44
   0  19  -4    3.84    3.97
 -14 -11  -5   14.35    3.77
   2  13  -5    8.20    3.29
  -8  -8  -6   59.81    3.92
   2  12  -6   81.32    3.76
   1  16  -6   10.91    3.75
 -15 -11  -7    7.11    4.30
   2   9  -7 1585.65    9.02
   2  10  -7  173.27    4.30
   2  11  -7  265.13    4.68
   0  18  -7   -4.60    4.08
 -16 -11  -8   20.00    4.18
 -13 -10  -8   73.31    4.31
   1   4  -8   71.60    3.77
   1  15  -8  124.81    4.45
   0   2  -9  200.83    5.53
   0  17  -9   13.43    4.28
  -1  19  -9   -1.71    4.65
  -1   1 -11  283.23    6.72
   1   7 -11   30.85    3.71
   1  12 -11   -3.44    3.23
   0  16 -11   32.68    4.50
  -1  18 -11   -0.92    3.99
   0   4 -12   -0.73    3.55
   0  15 -12   -4.85    3.64
 -12  -8 -13    4.86    3.80
   0  14 -13  177.94    4.56
  -1  17 -13  -11.74    4.10
 -13  -8 -14    8.04    4.42
   0   7 -14    6.25    3.37
   0  12 -14   12.15    3.88
  -1  16 -14    5.56    4.15
  -2   2 -15  123.61    4.76
  -1  15 -15   22.87    4.19
  -2  17 -15   23.03    4.62
  -2   3 -16   47.71    3.88
  -1   6 -16  122.70    4.18
  -1  13 -16   33.08    3.80
  -2  16 -16   10.65    3.85
  -1  10 -17    0.95    3.79
  -2  15 -17    3.46    3.97
  -2   6 -18   19.03    3.38
  -2  13 -18    9.17    4.10
  -3  14 -19    9.10    3.94
  -4   4 -20    1.97    3.90
  -3   8 -20    1.92    3.76
  -3  11 -20   62.68    4.40
  -3  12 -20    3.61    4.07
  -4  13 -21    4.19    4.57
  -2   4  17    0.90    7.09
  -3  -1 -13   63.91    8.29
  -5   4  23   61.08    7.53
  -3  10  21   92.08    7.86
  -9  -5 -16   48.42    7.31
  -5   0 -18  130.74    7.24
 -10   0 -23    0.98    7.00
  -8   2 -23   20.70    7.46
 -11   1  29    7.71    6.74
 -10   1  28   12.02    5.97
  -9   3  28   14.63    5.97
 -14  -5  26   15.48    6.55
  -7   4  26   57.48    6.98
 -13  -5  25   -6.34    5.89
  -9  -1  25    9.37    5.48
  -6   5  25    2.03    5.41
 -11  -4  24   32.24    6.48
 -10  -3  24   82.05    5.73
  -7   1  24   36.64    5.75
  -6   3  24   57.91    6.22
  -7  -1  22    5.77    5.69
  -4  14  22   15.93    6.85
 -10  -5  21  119.55    5.96
  -3  14  20    3.26    5.93
  -6  -2  19  136.19    5.66
  -2  10  19   15.64    5.70
 -16 -10  18    8.28    5.69
 -12  -8  18   76.60    5.58
  -2  14  18    4.72    6.20
 -10  -7  17    4.42    5.73
  -5  -2  17   -0.62    5.01
 -17 -11  16    7.73    6.55
  -1  13  16  102.71    6.10
 -12  -9  15   49.45    5.64
  -9  -7  15   17.20    4.79
   0   9  14    9.47    5.03
   0  10  14  104.02    5.69
  -1  16  14    3.93    6.03
 -15 -11  13   51.19    6.12
 -11  -9  13   -1.18    5.69
  -5  -4  13    9.77    5.17
   0  13  13   -4.21    5.80
  -1  17  13    8.25    5.88
  -9  -8  12   25.07    4.83
 -17 -12  11   -8.42    5.68
 -14 -11  11   -1.93    5.22
 -12 -10  11  262.30    6.29
   1  12  10    4.47    4.76
  -1  19  10    0.17    6.67
 -16 -12   9   17.95    6.05
  -3  -3   9    2.84    4.20
   1   6   9   99.94    6.38
   0  17   9    9.90    6.28
 -13 -11   8   -5.57    5.39
 -11 -10   8   40.06    5.88
   1   5   8  295.80    8.22
   0  18   7    7.25    6.08
   1  16   6   45.37    5.60
 -15 -12   5   14.24    6.26
   2   8   5   15.37    5.30
   2  12   5    6.52    4.85
 -15 -12   4   28.23    6.27
   2   7   4  339.92    6.72
   0  19   4   -5.60    5.90
 -15 -12   3   16.32    6.27
   1  17   3   68.70    5.58
 -15 -12   2    6.21    6.24
  -2  -3   2    1.73    4.61
   2  14   1   32.56    4.71
   2  14   0   70.54    4.94
 -16 -12  -2   52.24    6.17
 -13 -11  -2   25.09    5.61
  -2  -3  -2   24.59    4.99
   2  14  -2  100.60    4.93
  -9  -9  -3  127.91    5.44
   2  14  -3    8.37    5.20
  -5  -6  -4  172.28    6.27
  -3  -4  -4    1.48    4.25
   1  17  -4   10.88    5.20
   0  19  -5   50.02    5.87
 -12 -10  -6    0.82    5.54
   1   3  -6  456.94    8.00
   2   7  -6   30.62    5.24
  -7  -7  -7   91.48    5.57
   2   8  -7   10.39    5.03
   1  16  -7   17.05    5.27
  -6  -6  -8   17.31    5.08
   0  18  -8    7.61    5.79
 -14 -10  -9  150.38    6.86
  -1   0  -9    0.34    4.11
   1  15  -9    0.65    5.41
 -15 -10 -10   -2.41    6.04
 -12  -9 -10  162.98    6.32
   1  14 -10  154.52    6.01
   0  17 -10    1.10    5.88
  -1  19 -10    9.41    6.35
 -16 -10 -11   99.44    7.22
   1  13 -11   14.93    5.50
   1   9 -12   10.43    4.75
   1  10 -12    8.45    4.61
   1  11 -12    5.16    4.56
  -1  18 -12   11.67    6.45
 -15  -9 -13   69.31    6.11
 -10  -7 -13    3.42    5.62
   0   5 -13  244.88    6.21
  -9  -6 -14    4.63    5.68
   0  13 -14   11.21    5.36
   0  10 -15   -1.79    5.61
 -13  -7 -16   19.62    6.18
  -3   1 -16  125.23    6.11
  -1  14 -16   21.96    6.18
 -12  -6 -17   18.21    6.33
 -10  -5 -17   84.64    6.50
  -3   2 -17    5.17    4.71
  -2   4 -17   12.42    4.78
  -1   8 -17    4.90    5.13
  -1   9 -17  141.37    6.06
  -1  11 -17   98.62    5.68
  -3   3 -18  240.67    6.39
  -2  14 -18   54.17    5.94
  -2   9 -19   30.14    5.39
  -2  10 -19   11.72    5.25
  -3  15 -19   31.84    6.28
  -5   2 -20    1.75    5.54
  -3   7 -20   41.14    5.51
  -3  13 -20   51.39    5.73
  -4   6 -21  112.98    5.87
  -6   5 -23   23.07    6.11
  -5   9 -23   62.69    5.98
  -5  10 -23   20.01    6.11
  -6   9 -24    9.44    6.29
 -10   0  27    3.85    4.20
 -13  -4  26   34.71    4.31
 -10  -1  26    4.78    4.51
 -15  -6  25   -6.62    4.61
 -12  -4  25    0.29    4.32
 -11  -3  25   50.88    4.61
 -10  -2  25   60.84    4.89
 -14  -6  24   24.37    4.07
 -13  -6  23   22.28    4.28
  -7   0  23   -2.05    4.02
 -12  -6  22   11.07    4.46
 -13  -7  21  215.09    5.17
  -9  -4  21    4.68    4.01
  -8  -3  21   11.28    4.08
 -16  -9  20    3.40    4.72
 -12  -7  20   16.88    3.82
 -15  -9  19   11.04    4.26
 -13  -8  19   52.94    3.89
 -10  -6  19    3.59    3.98
 -14  -9  18   30.42    4.40
 -15 -10  16   32.68    4.35
 -11  -8  16    5.78    3.95
  -4  -1  16   -1.91    3.58
  -2  17  16    4.30    4.79
 -17 -11  15   11.84    4.78
 -14 -10  15  151.87    4.96
  -8  -6  15   83.40    3.91
  -5  -3  15    2.68    3.62
  -1  15  15   16.13    4.70
 -16 -11  14    1.16    4.04
 -10  -8  14   -2.67    3.30
   0  11  14  106.46    5.17
 -13 -10  13   47.78    3.97
  -7  -6  13  383.58    5.38
  -6  -5  13  314.96    5.34
 -18 -12  12    2.69    4.52
 -15 -11  12  108.72    4.69
   0  15  12    3.81    3.84
  -1  18  12    1.46    4.00
   0  16  11   44.62    4.68
 -17 -12  10   16.50    4.16
 -14 -11  10   -1.17    3.76
 -12 -10  10   25.27    4.05
 -10  -9  10   16.97    3.35
  -6  -6  10   -1.40    3.53
  -5  -5  10  171.70    4.72
  -7  -7   9  160.15    4.42
   1  14   9   20.32    4.24
 -16 -12   8    9.26    4.12
  -8  -8   8   37.61    3.69
   1  15   8  317.77    5.49
   0  18   8    9.24    4.19
 -16 -12   7   32.20    4.44
 -13 -11   7    6.69    3.85
 -11 -10   7    5.91    3.33
 -13 -11   6    9.65    3.99
  -9  -9   6   28.95    3.62
   2   9   6   71.36    4.20
   2  10   6    0.02    3.57
   2  11   6  279.77    5.26
  -9  -9   5   29.16    3.69
  -5  -6   5   87.97    3.74
  -4  -5   5  121.58    4.14
   0  19   5   45.22    4.29
  -6  -7   4  133.01    4.49
  -3  -4   4   10.63    3.16
   2  13   4   44.23    3.62
   1  17   4   28.87    3.89
  -6  -7   3  200.68    4.84
   2   6   3  123.55    4.50
   2  14   3   15.92    4.22
   2  14   2   38.64    4.34
  -2  -3   1   24.90    3.74
 -16 -12   0    6.14    4.30
 -13 -11   0    4.96    3.91
   2  15   0    0.95    3.92
   0  20   0   60.87    5.02
 -16 -12  -1   24.88    4.31
 -13 -11  -1   32.89    3.91
  -6  -7  -1   83.71    4.23
   2   5  -1  128.14    4.56
   2  15  -1   13.31    3.93
   1  18  -1    2.58    4.37
   0  20  -1   40.01    4.69
 -11 -10  -2   -1.58    4.13
  -9  -9  -2   10.38    3.52
  -6  -7  -2   37.89    3.92
   2   5  -2   75.18    3.92
   2  15  -2   15.86    4.11
   0  20  -2   57.60    4.92
 -17 -12  -3   28.57    4.24
 -11 -10  -3   72.62    4.48
 -14 -11  -4    1.20    3.75
  -4  -5  -4   49.32    3.62
   2  14  -4  124.18    4.51
  -8  -8  -5   16.43    3.55
   2   6  -5  120.85    3.95
   2  14  -5    8.64    4.04
   1  17  -5   16.32    3.66
 -15 -11  -6   -4.28    4.39
 -10  -9  -6   62.13    3.73
   2  13  -6   28.42    3.40
   1  17  -6   36.38    3.82
   0  19  -6   13.21    3.98
 -16 -11  -7   -7.71    4.23
   0   1  -7  116.08    5.37
   2   7  -7    6.05    3.55
   2  12  -7   30.25    3.50
   2  13  -7   66.78    3.56
   0  19  -7    8.91    4.10
 -17 -11  -8    1.74    4.57
 -11  -9  -8   -0.64    4.01
  -9  -8  -8    3.63    3.41
   2   8  -8  321.55    5.17
   2   9  -8   -0.24    3.55
   2  10  -8    6.69    3.39
   2  11  -8   88.60    3.84
   2  12  -8  122.80    3.86
   1  16  -8   38.54    3.86
   0  18  -9    0.56    4.03
 -10  -8 -10    0.82    4.13
   1   5 -10  198.57    4.92
   1  15 -10    9.87    3.76
 -13  -9 -11   23.99    3.99
   0   3 -11   21.73    3.76
   1   6 -11  447.59    5.98
   1  14 -11   59.86    4.10
   0  17 -11    8.45    4.13
 -14  -9 -12   71.65    4.74
   1   8 -12    2.08    3.39
   1  12 -12   94.85    4.26
   0  16 -12   -0.16    4.33
   0  15 -13   39.16    3.76
 -11  -7 -14    2.72    3.84
  -1   3 -14  836.91    8.55
   0   6 -14   50.05    3.76
   0  14 -14   81.46    4.06
  -1  17 -14   21.04    4.06
 -12  -7 -15  123.13    4.92
  -1   4 -15   11.39    3.49
   0   8 -15   14.58    3.40
   0   9 -15   10.15    3.30
   0  11 -15   64.46    4.11
   0  12 -15    2.77    3.71
  -1  16 -15    2.87    3.94
  -1   7 -17   15.58    3.33
  -1  12 -17   -0.35    3.68
  -1  13 -17   97.06    4.20
  -2  16 -17    8.25    4.47
  -2   8 -19    3.76    3.79
  -2  11 -19  129.23    4.25
  -2  12 -19    9.29    4.31
  -3  14 -20   -1.38    4.60
 -10  -2 -21    0.08    4.34
  -5   5 -22   45.79    4.06
  -4   9 -22   13.83    4.30
  -4  10 -22    5.18    4.05
  -4  11 -22   11.32    3.94
  -5   8 -23   12.25    4.00
  -5  11 -23    5.56    4.35
  -7   5 -24   25.54    4.20
  -6   8 -24   21.76    4.80
  -3   9  21   55.78    8.73
  -3  11  21   60.03    8.51
  -2   9  19   24.53    7.32
  -2  11  19   14.51    6.85
 -10   3  29   -1.13    6.86
 -11   0  28   29.15    6.01
  -8   6  28   -3.10    6.86
 -13  -3  27   57.29    7.03
 -11  -1  27   10.19    5.90
 -12  -3  26   35.72    6.15
 -11  -2  26   68.61    6.40
  -8   2  26   51.09    6.60
  -6   2  23    0.24    5.69
 -14  -7  22    0.42    5.96
 -11  -5  22   56.20    5.60
  -8  -2  22    4.60    5.74
 -14  -8  20   74.84    6.33
  -6  -1  20  305.31    6.52
  -9  -5  19   22.47    5.90
  -7  -3  19   90.12    5.28
  -2  12  19    6.78    5.41
 -11  -7  18   54.97    5.65
 -16 -10  17   18.74    5.84
  -9  -6  17  135.63    5.22
  -6  -3  17    9.99    4.97
  -2  16  17   43.74    6.06
 -13  -9  16   23.61    5.30
  -3   0  15   -1.40    5.13
  -2   2  15  454.97   10.25
 -14 -10  14   12.18    5.40
 -12  -9  14   56.94    5.68
   0  12  14    1.25    5.81
   0  14  13  185.63    6.57
 -13 -10  12   10.72    5.43
 -11  -9  12   57.16    5.93
  -8  -7  12  588.10    7.02
  -4  -3  12   27.47    5.28
 -18 -12  11   13.27    6.42
  -9  -8  11  109.80    5.16
   1  10  11   18.21    5.05
   1  11  11   29.74    5.00
  -2  -1  10   94.86    5.47
   1   7  10   44.52    5.65
   1  13  10    3.77    5.80
   0  17  10   -3.38    6.22
 -17 -12   9   12.43    5.68
 -14 -11   9    8.08    5.30
 -10  -9   9   54.08    4.94
   1  16   7    3.13    5.44
 -16 -12   6   15.27    5.96
 -11 -10   6   53.83    4.84
   2  12   6   10.54    4.81
   0  19   6   11.21    5.92
 -16 -12   5   -1.64    5.93
 -13 -11   5   -5.70    5.50
   2   7   5  175.54    6.46
   2  13   5   -0.23    4.74
   1  17   5    2.16    5.25
 -16 -12   4   66.28    6.20
 -13 -11   4   34.67    5.61
  -9  -9   4  136.88    5.49
  -5  -6   4  114.45    4.85
  -4  -5   4    8.79    4.40
   2  14   4   95.58    6.07
 -16 -12   3  106.90    6.53
 -13 -11   3    8.44    5.48
 -16 -12   2   28.39    6.27
 -13 -11   2   68.87    5.78
  -6  -7   2    9.99    5.19
   0  20   2   66.43    6.79
 -16 -12   1  149.08    6.60
 -13 -11   1   35.31    5.69
  -6  -7   1    3.87    5.17
   2  15   1   20.91    5.60
   1  18   1    3.27    6.18
   0  20   1   30.28    6.79
  -9  -9   0   45.70    5.10
  -6  -7   0   33.90    5.29
  -2  -3   0   52.51    5.35
   2   5   0   78.17    5.10
   1  18   0   -2.35    6.23
 -11 -10  -1   37.98    4.88
  -9  -9  -1   96.81    5.31
  -2  -3  -1   92.59    5.96
 -17 -12  -2   -1.78    5.81
   1  18  -2    5.30    6.06
 -14 -11  -3   -1.91    5.34
  -5  -6  -3   87.55    4.88
   2  15  -3    9.82    5.52
   1  18  -3    3.88    6.05
   0  20  -3   34.99    6.51
   2  15  -4   15.40    5.53
 -15 -11  -5    2.84    6.23
 -12 -10  -5   40.97    5.72
   2   6  -6   -0.07    4.04
   2  14  -6   36.92    5.75
 -13 -10  -7  146.57    6.04
   1  17  -7   70.18    6.30
   1  16  -9    7.79    5.13
   0  18 -10   -3.77    5.60
  -6  -5 -11  202.93    7.02
   1   7 -12   16.10    4.96
   1  13 -12   32.57    5.55
 -16  -9 -13    8.38    6.64
  -7  -5 -13    5.57    4.80
  -1   2 -13   75.05    5.65
  -1  18 -13  -13.77    6.41
  -2   1 -14    6.06    5.04
 -15  -8 -15   13.94    6.66
 -10  -6 -15   30.01    5.76
   0  13 -15    4.72    5.21
 -11  -6 -16   22.63    5.53
  -1   5 -16  191.45    5.83
  -1  15 -16   73.08    5.98
  -2   5 -18   56.07    4.91
  -2  15 -18    6.74    5.43
  -3   4 -19   23.97    5.68
  -2   7 -19  112.88    5.94
  -2  13 -19   33.48    5.80
  -3   6 -20    4.59    5.47
  -5   3 -21    2.25    5.38
  -4   5 -21   38.63    5.48
  -3  10 -21    4.62    5.90
  -6   3 -22   42.03    5.51
  -4   8 -22   32.09    6.18
  -4  12 -22   28.86    6.48
  -7   3 -23    1.94    6.15
  -5   7 -23   15.48    5.86
  -9   2 -24   11.54    5.93
  -6   7 -24   -4.58    5.68
 -13  -2  28   50.79    4.99
 -12  -1  28   -3.09    4.84
 -12  -2  27   85.24    4.73
 -15  -7  23   60.75    4.31
 -12  -5  23   37.33    4.56
 -16  -8  22    6.05    4.73
 -10  -4  22   11.00    4.04
  -9  -3  22   60.04    4.32
 -15  -8  21   18.15    4.20
 -11  -6  20    1.34    3.92
  -8  -4  19   45.51    3.73
 -17 -10  18   -0.64    4.69
  -5  -1  18    8.47    3.56
 -14  -9  17   33.02    4.49
 -12  -8  17    6.79    3.83
  -8  -5  17   25.42    3.52
  -7  -4  17   11.27    3.46
 -10  -7  16    7.27    4.05
  -1  14  16    4.68    4.61
 -15 -10  15   -3.83    4.42
 -11  -8  15   99.42    4.56
  -7  -5  15    5.58    3.46
  -6  -4  15   50.04    3.90
 -17 -11  14   -0.77    4.01
  -9  -7  14   34.13    3.52
  -4  -2  14  162.00    5.00
 -16 -11  13    2.49    4.19
 -10  -8  13    5.58    3.31
  -7  -6  12   63.47    3.90
  -2   0  12    7.66    3.09
 -15 -11  11    3.35    4.41
  -3  -2  11  176.50    4.92
   1   9  11    8.44    3.60
   1  12  11   99.97    4.96
 -18 -12  10    8.24    4.73
   1  14  10  212.85    5.23
 -12 -10   9   11.31    4.04
  -6  -6   9  277.48    5.10
  -5  -5   9    4.39    3.63
  -4  -4   9    1.98    2.93
   1  15   9   13.44    4.05
   0  18   9    1.16    4.18
 -17 -12   8   39.93    4.16
 -14 -11   8    1.91    3.73
 -10  -9   8   19.49    3.48
  -7  -7   8   15.66    3.63
   1  16   8   32.33    3.94
 -17 -12   7    3.17    4.16
  -8  -8   7   12.11    3.54
  -2  -2   7  120.09    4.82
   0  19   7   23.35    4.08
   2   8   6  665.89    7.85
   2  13   6   78.05    3.93
   1  17   6   26.82    4.62
 -11 -10   5   -1.25    3.30
  -1  -1   5   74.44    5.07
   2  14   5   71.72    4.52
 -11 -10   4   20.38    3.37
   2   6   4   17.72    3.26
   0  20   4   25.88    4.87
 -11 -10   3   31.25    3.45
  -9  -9   3    5.30    3.53
  -5  -6   3   48.14    3.46
  -4  -5   3  427.79    6.26
  -3  -4   3   22.27    3.40
   2  15   3    4.51    3.88
   1  18   3   12.85    4.39
   0  20   3   22.80    4.82
 -11 -10   2   -1.18    3.26
  -9  -9   2  107.41    4.04
   2  15   2   29.08    4.11
   1  18   2   12.33    4.39
 -11 -10   1    4.77    3.31
  -9  -9   1    4.59    3.55
   2   5   1    5.70    3.16
 -17 -12   0    9.44    4.11
 -11 -10   0    3.91    3.28
   1   2   0   21.33    4.11
 -17 -12  -1    0.52    4.11
   1   2  -1    7.58    3.59
   2  16  -1    0.17    3.89
 -18 -12  -2   18.03    4.83
 -14 -11  -2    4.95    3.85
  -5  -6  -2   20.80    3.24
   1   2  -2   10.21    3.64
   2  16  -2   81.87    4.29
  -4  -5  -3    2.25    2.99
  -3  -4  -3   38.35    3.75
   2   5  -3   10.02    3.13
  -8  -8  -4  393.67    5.84
   2   5  -4   84.54    3.93
   1  18  -4    0.52    4.33
   0  20  -4   26.11    4.56
 -10  -9  -5    4.61    3.33
   2  15  -5    4.53    3.88
   1  18  -5   14.44    4.17
   0  20  -5   23.34    4.52
 -16 -11  -6   50.32    4.46
  -7  -7  -6   42.10    3.95
   2  15  -6  115.80    4.40
   1  18  -6   13.91    4.30
   0  20  -6   -0.16    4.42
 -17 -11  -7   -2.08    4.84
   1   3  -7   51.79    3.76
   2  14  -7  108.42    4.48
 -14 -10  -8   25.19    4.69
   2   7  -8   -1.11    3.50
   2  13  -8   13.54    3.30
   1  17  -8   19.08    4.27
   0  19  -8   10.45    4.77
  -8  -7  -9   89.89    4.31
   1   4  -9  324.85    5.74
   2   8  -9   95.04    4.16
   2   9  -9 1424.56    8.50
   2  10  -9    2.44    3.35
   2  11  -9    1.93    3.29
   2  12  -9   -0.59    3.22
   0  19  -9   22.96    4.60
 -16 -10 -10    8.29    4.20
   1  16 -10   13.48    3.62
  -9  -7 -11    0.48    3.30
   1  15 -11   12.67    3.79
   0  18 -11   10.66    4.03
   1  14 -12   82.48    4.23
   0  17 -12    0.50    4.04
   1   9 -13   80.40    3.74
   1  10 -13   50.90    3.57
   1  11 -13   59.34    3.53
   1  12 -13   88.47    4.32
   0  16 -13   28.90    4.38
   0  15 -14   -0.48    4.33
   0   7 -15   -1.80    3.37
   0  14 -15  223.42    4.69
  -1  17 -15   39.60    4.65
   0  10 -16   20.21    3.84
   0  11 -16   46.66    4.09
  -1  16 -16    5.46    3.93
  -1  14 -17   14.69    4.08
  -1   9 -18   -2.41    3.95
  -1  10 -18   50.48    4.06
  -1  11 -18    0.82    3.66
  -2  14 -19    2.49    4.04
  -3   8 -21    3.11    3.60
  -3   9 -21    5.22    4.30
  -3  11 -21   54.91    4.49
  -3  12 -21    6.52    4.06
  -4   7 -22    1.85    3.60
  -8   5 -25    6.22    4.55
 -12  -4 -20   30.31    8.64
  -7   7  27   -0.42    7.21
  -4   4  21    2.58    7.32
  -3  12  21   50.88    8.14
  -2   3  16    7.25    6.39
   0   6  13   16.52    6.52
  -7  -4 -15   21.72    6.11
  -5  -1 -17   77.06    7.25
 -10   1 -24   36.65    8.46
  -9   2  27   60.48    6.59
  -8   4  27   11.42    6.21
 -14  -5  25   15.08    5.79
  -8   1  25   40.09    5.69
  -7   3  25    1.88    5.46
 -13  -5  24   54.01    6.11
  -8   0  24    6.56    5.57
 -11  -4  23    1.95    5.40
  -8  -1  23   26.03    5.68
  -6   1  22   22.75    5.98
  -5   3  22   29.92    6.13
 -12  -6  21    5.60    5.29
  -6   0  21   -0.01    5.40
 -17  -9  20    7.13    6.37
 -10  -5  20   46.21    5.89
  -7  -2  20   16.14    4.86
  -3  15  20   -0.24    6.74
 -16  -9  19   -4.32    5.74
 -12  -7  19   17.98    5.47
  -3   4  19    1.20    4.86
 -15  -9  18    5.30    6.00
 -13  -8  18   -5.82    5.34
 -10  -6  18   82.99    6.02
  -2  15  18    1.01    6.14
  -4   0  17   -0.23    5.11
  -1  10  17   16.48    6.06
  -1  11  17   51.19    6.14
 -16 -10  16   65.41    6.02
 -13  -9  15   37.14    5.57
  -1  16  15    0.25    6.00
   0   8  14  474.68    9.39
   0  13  14   15.54    5.72
  -1  17  14   19.95    5.94
 -14 -10  13  333.11    6.40
 -12  -9  13    8.64    5.62
  -3  -1  13    4.58    5.29
   0  15  13   44.18    5.74
  -1  18  13   -3.14    6.83
 -16 -11  12   18.36    6.05
  -6  -5  12  212.40    6.00
  -5  -4  12   59.23    5.53
  -1   2  12  341.98   11.12
   0  16  12    3.09    6.34
 -13 -10  11   36.85    5.55
 -11  -9  11   -2.44    5.79
  -8  -7  11   21.09    5.06
   0  17  11    4.94    6.15
 -15 -11  10   62.68    5.87
  -9  -8  10    0.37    4.82
 -18 -12   9   25.37    6.78
 -12 -10   8   16.03    5.73
  -3  -3   8   96.98    5.19
 -14 -11   7   12.57    5.43
   1   4   7    6.00    4.44
   2   9   7   49.07    5.50
   2  10   7   19.71    5.19
   2  11   7   21.76    5.11
   2  12   7   12.46    4.89
 -17 -12   6   24.53    5.70
 -14 -11   6    4.02    5.38
  -8  -8   6   -1.53    5.05
 -17 -12   5    1.76    5.80
   1   3   5   68.16    6.14
   0  20   5   24.71    6.58
 -17 -12   4    8.06    5.86
   2  15   4   48.48    5.77
   1  18   4   14.53    6.18
 -17 -12   3   14.70    5.77
 -17 -12   2    2.07    5.94
  -5  -6   2  314.20    6.12
  -3  -4   2   37.93    4.75
   2   5   2  223.32    6.43
 -17 -12   1    2.62    5.83
  -5  -6   1  740.04    8.16
   2  16   1   30.82    5.62
  -5  -6   0  163.86    5.41
   2  16   0   89.43    5.78
 -18 -12  -1   27.67    6.81
 -14 -11  -1   22.40    5.38
  -5  -6  -1  475.70    7.12
  -3  -4  -2   15.35    4.61
   1   2  -3    5.22    4.72
   2  16  -3   23.14    5.46
 -15 -11  -4   30.85    6.26
 -12 -10  -4   23.39    5.69
   2  16  -4    2.24    5.35
 -13 -10  -6  114.02    6.02
 -11  -9  -7   -5.14    5.74
  -9  -8  -7   11.41    4.84
   2   6  -7  178.83    5.17
  -5  -5  -8    1.35    5.03
   2  14  -8    7.64    5.72
 -15 -10  -9   51.04    6.36
 -12  -9  -9   11.31    5.56
   2  13  -9   40.25    5.85
   1  17  -9   14.81    5.98
 -13  -9 -10   34.42    5.56
  -7  -6 -10  291.84    7.14
   0   2 -10    2.59    4.12
   2  10 -10   26.96    4.77
   2  11 -10   40.61    4.80
 -11  -8 -11  104.15    6.23
 -15  -9 -12   21.81    6.08
 -12  -8 -12   61.67    5.79
  -8  -6 -12    4.66    4.72
 -13  -8 -13   20.00    6.36
   0   4 -13  273.11    6.55
   1   8 -13  145.62    5.42
   1  13 -13   82.18    5.69
 -14  -8 -14   32.02    6.10
   0   5 -14  226.85    6.02
  -3   0 -15   -0.03    4.92
 -14  -7 -16    4.55    5.88
   0   9 -16   53.47    4.76
   0  12 -16   52.25    5.50
  -1   6 -17   13.96    4.72
  -1  15 -17   16.26    5.73
 -14  -6 -18   12.84    6.81
  -4   1 -18   33.27    5.10
  -1   8 -18   13.41    5.55
  -1  12 -18    1.85    5.21
  -4   2 -19  200.38    6.30
  -4   3 -20   23.62    5.76
  -2  10 -20   10.93    5.13
  -2  11 -20   10.21    6.05
  -3  13 -21   -6.99    6.53
  -6   4 -23    2.20    6.07
  -8   3 -24   93.61    6.47
 -10   2  28   27.28    4.41
 -14  -4  26   39.62    5.14
  -9   1  26   44.15    4.79
 -13  -4  25    8.30    4.27
 -15  -6  24   -5.35    4.82
 -12  -4  24    3.37    4.40
 -16  -7  23   16.02    4.56
 -14  -6  23    2.56    4.24
 -10  -3  23   -2.28    3.93
  -9  -2  23    1.90    3.94
 -15  -7  22    2.29    4.19
 -13  -6  22    0.75    4.40
 -16  -8  21   -3.49    3.98
 -14  -7  21   30.76    4.32
 -15  -8  20   12.87    4.25
 -13  -7  20   94.70    4.16
  -9  -4  20   21.51    4.21
  -8  -3  20    9.21    4.20
 -14  -8  19    9.20    4.38
  -5   0  19   -0.04    3.56
  -2  13  19   -0.50    4.47
  -9  -5  18   20.85    3.44
  -6  -2  18    7.34    3.56
 -17 -10  17   23.89    4.06
 -11  -7  17  137.18    4.60
  -1  12  17   46.32    4.42
 -14  -9  16   43.64    3.93
 -12  -8  16   76.02    4.29
  -9  -6  16    6.49    3.43
  -5  -2  16   29.54    3.84
  -3   1  16    4.21    3.63
 -10  -7  15   22.80    3.46
 -18 -11  14    6.12    4.56
 -15 -10  14   14.25    4.40
 -11  -8  14    5.62    4.03
  -8  -6  14   27.52    3.59
  -5  -3  14   24.06    3.81
 -17 -11  13   12.96    4.09
  -9  -7  13   17.53    3.52
 -14 -10  12   -0.61    3.77
 -10  -8  12   17.30    3.47
 -16 -11  11   11.62    4.27
   1   8  11  120.68    4.97
   1  13  11    3.33    4.12
 -13 -10  10    8.30    3.89
 -11  -9  10   87.67    3.73
   0  18  10   -1.30    4.16
 -15 -11   9    1.89    3.65
  -9  -8   9   10.88    3.49
 -18 -12   8   -1.06    4.58
 -15 -11   8   -3.58    3.74
  -6  -6   8   12.20    3.75
  -4  -4   8   13.21    3.09
   0  19   8   21.45    4.84
 -18 -12   7   15.04    4.04
 -12 -10   7   34.35    4.21
 -10  -9   7    4.95    3.43
  -7  -7   7  236.25    4.81
   2  13   7   32.57    3.63
   1  17   7   21.02    4.57
 -18 -12   6   12.86    4.10
 -12 -10   6    2.06    4.08
 -10  -9   6   13.28    3.44
   2   7   6   68.10    4.42
   2  14   6   56.17    4.44
 -18 -12   5    3.72    4.14
 -14 -11   5   -0.74    3.79
  -8  -8   5    3.27    3.62
   2  15   5   17.11    4.09
   1  18   5   53.99    4.58
 -14 -11   4    3.92    3.82
  -8  -8   4   13.67    3.62
 -14 -11   3    9.47    3.81
   2  16   3  130.68    4.59
 -18 -12   2   24.10    4.91
 -14 -11   2   -1.58    3.88
  -4  -5   2    5.12    3.09
   2  16   2   36.47    4.04
   1  19   2    5.09    4.26
 -18 -12   1   87.22    5.31
 -14 -11   1    8.98    3.95
  -4  -5   1   78.50    3.98
  -3  -4   1    8.93    3.26
   1   2   1    0.88    3.45
   1  19   1   53.60    4.31
 -18 -12   0   -2.93    4.79
 -14 -11   0   -2.60    3.88
  -4  -5   0  324.43    5.96
  -3  -4   0    7.85    3.21
   1  19   0    6.62    4.15
  -4  -5  -1   21.94    3.39
  -3  -4  -1    1.80    3.10
   3  11  -1  194.02    4.53
   1  19  -1   37.47    4.28
  -8  -8  -2  170.35    4.61
  -4  -5  -2  335.02    6.19
   3  10  -2   26.06    3.71
   3  11  -2  258.69    4.92
   1  19  -2   21.68    4.26
 -15 -11  -3    6.94    4.52
 -12 -10  -3    9.81    4.12
  -8  -8  -3   42.50    3.84
   1  19  -3   63.84    4.33
 -10  -9  -4   26.61    3.52
   1  19  -4   30.38    4.20
 -16 -11  -5    5.96    4.24
   2   5  -5  105.01    4.04
   2  16  -5   -1.52    3.76
   1  19  -5   25.89    4.23
 -17 -11  -6    6.88    4.07
   2  16  -6   16.04    3.85
 -14 -10  -7   13.80    3.87
  -6  -6  -7   57.86    4.16
   2  15  -7  101.68    4.28
   1  18  -7   -0.43    4.14
   2  15  -8  195.46    4.74
   1  18  -8    8.17    4.01
 -10  -8  -9   41.63    3.65
   2   7  -9   41.97    3.76
   2  14  -9  138.10    4.58
 -17 -10 -10    3.61    4.80
   2   8 -10  152.28    4.45
   2   9 -10    2.94    3.45
   2  12 -10   24.08    3.33
   2  13 -10    5.52    4.01
   1  17 -10   30.44    4.30
   0  19 -10   13.29    4.56
 -14  -9 -11    7.92    4.54
   1   5 -11    9.58    3.64
   1  16 -11    7.21    4.34
   0   3 -12   44.39    4.03
   1   6 -12   37.94    3.79
   1  15 -12   20.73    3.81
   0  18 -12   21.78    4.55
   1   7 -13  159.41    4.39
   1  14 -13   89.75    4.23
   0  17 -13   10.37    4.11
   1   9 -14    7.53    3.38
   1  10 -14    8.30    3.24
   1  11 -14   -1.26    4.03
   1  12 -14   37.67    4.06
   0  16 -14    1.89    4.15
   0   6 -15   74.76    3.82
   0  15 -15    6.60    4.32
   0   8 -16  334.84    5.00
   0  13 -16   -0.08    3.65
  -1  17 -16   56.67    4.82
  -1  13 -18   -2.80    4.25
  -1  14 -18   -6.16    4.18
  -2   6 -19   34.93    4.14
  -2  15 -19   16.10    4.76
  -3   5 -20  210.85    5.23
  -2   8 -20   21.98    3.82
  -2   9 -20   29.37    3.86
  -2  12 -20    2.25    4.14
  -2  13 -20    3.11    4.11
  -3   7 -21   44.50    4.04
  -5   4 -22   -0.46    3.61
  -4   6 -22   20.11    3.89
  -5   6 -23   25.57    4.51
  -4  10 -23    6.67    4.03
  -4  11 -23    6.82    4.53
  -7   4 -24   16.66    4.28
  -6   6 -24   -1.41    4.03
  -5   9 -24    4.30    4.57
  -5  10 -24   23.29    4.67
  -4   6  22    0.33    6.94
  -1   9  17  261.96    9.68
 -13  -5 -19   35.13    7.33
 -11   2  29    4.74    6.86
  -9   4  28   15.22    5.86
  -7   5  26   20.86    6.43
  -9   0  25   -2.66    5.29
 -11  -3  24   22.08    5.96
  -9  -1  24   26.14    5.52
 -11  -5  21   74.27    5.74
  -5   2  21   85.37    6.66
  -3  13  21   11.50    6.17
  -5   1  20   16.20    4.97
 -11  -6  19   83.52    5.89
 -15  -9  17   50.69    6.21
  -1  13  17   41.27    5.75
  -1  15  16  102.47    6.73
 -16 -10  15  110.34    6.33
 -13  -9  14  113.49    5.88
  -7  -5  14   -0.05    4.99
   0  14  14   91.42    5.98
 -17 -11  12    2.65    5.76
 -12  -9  12   13.33    5.69
  -7  -6  11  344.14    6.39
 -16 -11  10   19.61    6.08
   1  15  10   23.34    5.53
   1  16   9    1.07    5.28
   0  19   9   16.68    6.84
  -5  -5   8   48.50    4.43
  -1   0   8  181.13    7.41
   2  11   8   94.82    5.47
   1  17   8    5.43    6.32
   2   8   7   -0.13    5.25
   1  18   6   55.89    6.20
 -18 -12   4   60.44    5.97
 -18 -12   3  108.62    6.67
  -8  -8   3    0.18    5.01
   1  19   3   48.19    5.92
   3  10   0    9.36    5.04
   3  11   0  346.88    6.42
   2  17   0    0.09    5.32
  -8  -8  -1    3.06    5.07
   3  10  -1    2.33    5.03
   3  12  -1  258.71    5.78
   2  17  -1   87.59    5.57
 -15 -11  -2    6.26    5.38
 -12 -10  -2   91.72    5.97
   3  12  -2    1.19    4.88
   2  17  -2   31.42    5.36
 -10  -9  -3    8.08    4.87
   3  10  -3   39.04    5.15
   3  11  -3  485.94    6.69
   3  12  -3  102.36    5.21
   2  17  -3    9.30    5.29
 -16 -11  -4   54.20    6.36
   1   2  -4  128.24    6.35
   3  10  -4  107.50    5.42
   3  11  -4    3.59    4.96
 -13 -10  -5   45.99    5.76
  -7  -7  -5  435.75    7.39
 -11  -9  -6   11.48    5.86
   2   5  -6    3.27    4.23
   1  19  -6   41.99    5.76
   2  16  -7    7.84    5.29
 -15 -10  -8   28.61    6.23
  -4  -4  -8  271.89    8.27
  -3  -3  -8 1038.45   17.12
   2   6  -8    8.93    4.61
 -16 -10  -9  131.94    6.44
   1   4 -10   46.15    4.46
   2  10 -11  121.72    5.14
   2  11 -11   18.48    4.68
 -10  -7 -12   40.25    5.97
   1  13 -14  117.98    5.73
  -1   4 -16    2.84    4.79
   0   7 -16    8.08    4.68
   0  14 -16   94.92    6.58
  -2   3 -17   32.38    4.99
  -1  16 -17   38.16    6.64
  -1   7 -18    2.16    5.63
  -4   4 -21   20.48    5.52
  -4   9 -23    6.40    5.73
  -9   3 -25   -0.01    6.40
  -7   6 -25   20.87    6.74
 -10   4  29   -0.41    4.66
 -11   1  28   16.77    4.21
 -14  -3  27    4.12    4.66
 -10   1  27    6.46    4.32
 -13  -3  26   93.96    4.74
 -15  -5  25    4.59    4.58
 -12  -3  25   -3.42    4.44
 -11  -2  25   17.61    4.59
 -10  -1  25    7.83    4.59
 -14  -5  24   17.45    4.27
 -10  -2  24    4.80    3.86
  -7   2  24   41.03    4.38
 -13  -5  23   22.33    4.40
 -12  -5  22   24.30    3.94
 -10  -4  21   94.88    4.45
  -7  -1  21   -0.51    4.26
 -12  -6  20   54.98    4.05
  -4   3  20    8.61    3.58
 -14  -8  18   41.08    4.61
 -12  -7  18    3.30    3.85
  -8  -4  18  146.76    4.28
  -7  -3  18   70.06    3.96
  -4   1  18   91.42    4.53
 -13  -8  17   28.35    3.93
 -10  -6  17    7.80    4.01
  -8  -5  16   22.22    3.49
  -7  -4  16   55.11    3.84
  -6  -3  16  447.08    6.11
 -14  -9  15   49.30    3.94
 -12  -8  15    6.70    3.94
 -16 -10  14   33.13    4.46
  -6  -4  14   14.90    3.71
  -1  18  14   44.72    4.96
 -15 -10  13   -4.96    4.39
   0  16  13   42.33    4.63
 -18 -11  12   -0.52    4.69
   0  17  12   -1.47    4.28
 -17 -11  11   17.60    4.19
 -14 -10  11  192.25    4.58
 -10  -8  11    2.57    3.46
  -6  -5  11  113.75    4.35
  -5  -4  11  252.06    5.30
  -4  -3  11  252.99    5.58
   1  14  11   81.07    4.51
   0  18  11    1.37    4.14
  -8  -7  10   67.57    3.91
 -16 -11   9    3.38    4.31
 -13 -10   9   18.53    3.90
 -11  -9   9    3.20    3.28
 -13 -10   8   19.61    4.01
  -9  -8   8   69.29    3.88
   2  10   8   14.58    3.68
   2  12   8   22.53    3.66
 -15 -11   7   13.43    3.70
  -6  -6   7   41.22    3.94
  -3  -3   7  228.56    5.37
   2  14   7  531.41    6.60
   1  18   7   14.51    4.41
 -19 -12   6   16.07    4.49
 -15 -11   6   14.00    3.72
  -7  -7   6   -1.61    3.63
  -2  -2   6    5.85    3.23
   2  15   6   50.55    4.22
 -19 -12   5   -3.32    4.54
 -15 -11   5   -3.90    3.71
 -12 -10   5  160.63    4.76
 -10  -9   5  254.22    4.65
   2   6   5    2.51    3.08
 -19 -12   4   -4.45    4.53
 -12 -10   4    0.93    4.14
 -10  -9   4   -0.84    3.40
   2  16   4    3.86    3.96
   1  19   4    9.44    4.18
 -12 -10   3  248.78    5.13
   2   5   3  128.31    4.86
 -12 -10   2   11.81    4.14
  -8  -8   2   -2.68    3.57
   3  11   2  437.86    5.73
   2  17   2   65.00    4.15
 -12 -10   1  146.50    4.73
  -8  -8   1    5.27    3.59
   3  10   1    1.17    3.52
   3  11   1   13.91    3.65
   3  12   1   44.15    3.74
   2  17   1   87.54    4.16
 -15 -11   0   17.99    3.82
 -12 -10   0   84.97    4.52
  -8  -8   0   50.41    3.96
   3   9   0  167.51    4.57
   3  12   0  136.11    4.22
   3  13   0    5.39    3.32
   1  20   0    5.91    4.61
 -15 -11  -1   17.95    3.75
 -12 -10  -1    5.78    4.19
 -10  -9  -1   55.31    3.75
   3   9  -1   53.04    4.02
   3  13  -1   17.85    3.38
   1  20  -1    2.33    4.72
 -10  -9  -2   16.82    3.49
   3   9  -2   86.74    4.12
   3  13  -2    2.23    3.29
   1  20  -2    8.77    4.51
 -16 -11  -3    1.92    4.34
   3   9  -3   51.85    3.86
   3  13  -3   88.49    3.75
   1  20  -3    4.13    4.58
 -13 -10  -4    9.30    3.88
   3   9  -4   24.90    3.68
   3  12  -4   17.29    3.46
   3  13  -4   -0.88    3.27
   2  17  -4  145.17    4.28
 -17 -11  -5    9.94    3.98
   3  10  -5   24.85    3.66
   3  11  -5    5.86    3.47
   3  12  -5    1.97    3.35
   2  17  -5   -1.32    3.75
 -18 -11  -6   37.33    4.85
 -14 -10  -6    5.16    3.87
  -9  -8  -6    0.54    3.48
   3  11  -6  186.51    4.33
   2  17  -6   67.35    3.94
   1  19  -7   -1.01    4.05
 -12  -9  -8  166.35    4.93
  -8  -7  -8  194.35    5.05
   0   1  -8    2.31    3.00
   1   3  -8  945.44    9.68
   2  16  -8   23.80    3.78
   2  15  -9  168.38    4.45
   1  18  -9    4.58    4.05
 -11  -8 -10   10.80    4.07
   2  14 -10   44.20    4.00
   1  18 -10   -2.03    4.02
   2   9 -11  162.65    4.29
   2  12 -11   28.79    3.40
   2  13 -11   -3.75    3.96
   1  17 -11    0.45    4.23
 -16  -9 -12    6.30    4.81
   1  16 -12    2.75    4.27
   1  15 -13   16.24    3.67
   0  18 -13   34.50    4.73
 -15  -8 -14   28.57    4.31
   1   8 -14   11.13    3.37
   1  14 -14   58.18    3.99
   0  17 -14   -5.74    4.08
 -13  -7 -15   28.83    4.67
  -1   3 -15  457.25    6.75
   1  11 -15    6.08    3.83
   0  16 -15   -2.46    4.06
  -2   2 -16   16.56    3.61
   0  15 -16    4.30    4.20
  -1   5 -17    8.11    3.33
   0   9 -17    7.55    4.03
   0  10 -17   -4.89    3.86
   0  11 -17   -2.65    3.78
   0  12 -17    4.06    3.68
   0  13 -17   14.05    3.65
  -2   4 -18   21.30    3.48
  -1  15 -18    2.66    3.97
  -1   9 -19  116.56    4.42
  -1  10 -19   19.61    3.84
  -1  11 -19    1.73    3.70
  -1  12 -19   -1.18    4.31
  -1  13 -19   24.63    4.15
  -2   7 -20   -1.98    3.90
  -2  14 -20   11.39    4.59
  -3   6 -21   -1.04    3.86
  -3   9 -22   22.38    4.43
  -3  10 -22    7.20    4.08
  -3  11 -22   81.14    4.49
  -3  12 -22    0.27    4.74
  -3  13 -22   -4.29    4.49
  -4   8 -23   10.20    4.16
  -5   8 -24   72.48    4.46
  -8   4 -25   43.48    5.07
  -4  10  23   17.63   10.14
  -4  11  23   34.87    9.14
  -2   8  19   -0.07    8.22
  -4  12  23    4.06    7.15
  -5  -4 -11   85.30    7.30
  -4   0 -17    1.15    5.86
 -13  -1  28   12.41    6.59
 -12   0  28    5.08    6.86
  -8   7  28   21.69    6.99
 -13  -2  27   -1.95    6.40
 -12  -1  27   29.82    6.14
 -11   0  27   -7.07    6.03
 -12  -2  26    5.21    6.04
 -11  -1  26   63.39    6.38
 -10   0  26   -0.49    6.27
  -8   3  26   95.47    7.03
 -16  -6  24   20.29    6.62
  -6   4  24   20.59    5.74
 -15  -6  23   29.54    5.82
  -7   1  23   -4.77    5.72
 -16  -7  22    5.95    6.00
 -14  -6  22   28.38    6.17
 -11  -4  22   64.01    5.51
  -7   0  22  222.34    6.99
 -17  -8  21   23.89    6.47
 -13  -6  21   32.91    5.93
  -9  -3  21    9.12    5.76
  -8  -2  21  198.78    6.59
  -3  14  21   -0.88    6.90
 -16  -8  20   20.21    5.72
 -14  -7  20   12.34    6.25
 -15  -8  19   56.20    6.09
 -13  -7  19  201.19    5.95
 -10  -5  19   39.09    5.80
  -6  -1  19   10.56    5.04
  -4   2  19   12.23    5.07
  -2  14  19   10.81    6.13
  -3   3  18  163.08    7.06
  -2  16  18    0.54    6.87
  -3   2  17    7.67    5.15
  -1  14  17   19.09    6.39
 -18 -10  16   71.29    6.79
 -15  -9  16   27.94    6.19
 -11  -7  16   -3.28    5.73
  -1  16  16   -2.61    5.89
 -17 -10  15   -8.37    5.79
  -9  -6  15   15.75    4.71
  -4  -1  15  267.35    6.94
   0  10  15    1.67    5.86
   0  11  15   62.97    6.35
   0  12  15    2.96    5.74
  -1  17  15    8.60    7.01
 -10  -7  14  138.33    5.28
   0  15  14   -3.04    6.47
 -13  -9  13    3.26    5.57
 -11  -8  13  154.11    6.37
  -8  -6  13  227.62    5.82
  -4  -2  13   50.49    5.48
 -15 -10  12    1.63    5.15
  -9  -7  12  206.88    5.73
   1  10  12    3.65    4.84
   1  11  12   12.01    4.87
   1  12  12   44.14    6.23
 -12  -9  11    7.81    5.60
 -17 -11  10   28.90    5.96
 -14 -10  10   -6.33    5.37
   1   6  10   39.79    5.80
   1  16  10    7.61    5.35
   0  19  10   21.17    6.71
  -8  -7   9   64.93    5.26
   1  17   9    5.78    6.21
 -16 -11   8    1.46    6.05
 -11  -9   8   47.39    4.85
   2   9   8   11.02    5.26
   2  13   8    6.94    5.94
  -9  -8   7   48.55    5.23
  -5  -5   7   20.78    4.33
  -7  -7   5  304.52    6.33
   2  16   5  119.04    6.02
   1  19   5    4.87    5.90
 -15 -11   4  115.72    5.65
 -15 -11   3   56.00    5.61
 -10  -9   3  162.03    5.44
   2  17   3    2.11    5.45
 -15 -11   2  201.75    6.10
 -10  -9   2    5.17    4.82
   3  10   2   67.99    5.43
   3  12   2  146.96    5.48
   1  20   2    5.73    6.77
 -15 -11   1   75.00    5.68
 -10  -9   1   14.74    4.89
   3   9   1    6.24    5.12
   3  13   1    3.84    4.70
   1  20   1   -3.59    6.69
 -10  -9   0   11.57    4.95
   3  14   0    1.00    5.77
   3   8  -1    9.35    5.17
   3  14  -1    2.90    5.77
   2  18  -1    3.16    6.13
 -16 -11  -2    3.72    6.30
   3   8  -2   -2.51    5.16
   3  14  -2   13.21    5.79
   2  18  -2  102.33    6.45
   3   8  -3  129.21    5.72
   3  14  -3   70.83    5.97
   2  18  -3   10.04    6.04
 -17 -11  -4   18.91    5.93
  -7  -7  -4  223.29    6.32
   3  14  -4   42.47    5.85
   1  20  -4    6.36    6.41
 -18 -11  -5    0.81    6.59
 -11  -9  -5    8.66    4.76
  -9  -8  -5   21.85    4.96
   3   9  -5   11.20    5.09
   3  13  -5  168.14    5.35
   1  20  -5    2.88    6.41
  -6  -6  -6   67.34    5.57
   3  10  -6   15.57    5.07
   3  12  -6   40.33    4.86
 -15 -10  -7  119.25    6.77
  -5  -5  -7   94.61    5.98
   2   5  -7  199.65    5.61
   2  17  -7    7.20    6.20
 -16 -10  -8    8.32    5.99
 -10  -8  -8   13.92    4.89
   1  19  -8    9.64    6.06
 -17 -10  -9    7.79    6.76
 -13  -9  -9    1.11    5.43
   2   6  -9   67.33    5.40
   2  16  -9    4.31    5.21
 -14  -9 -10   78.35    6.67
  -9  -7 -10    3.18    4.81
   2   7 -10    4.52    4.97
   2  15 -10   13.25    5.30
 -15  -9 -11  130.99    6.67
   2   8 -11   88.31    5.26
   2  14 -11   40.30    5.54
  -1   1 -12   37.23    5.57
   1   5 -12   49.32    5.20
   2  10 -12   78.02    4.99
   2  11 -12   83.29    4.91
   2  12 -12   13.60    5.65
   1  17 -12   -3.25    5.83
 -14  -8 -13   13.18    6.07
 -11  -7 -13  127.27    6.36
  -9  -6 -13   22.87    5.94
  -2   0 -13    0.79    5.04
   1   6 -13  424.52    6.76
   1  16 -13   13.00    5.88
 -12  -7 -14   19.44    5.37
  -8  -5 -14   -0.36    4.72
   1  15 -14  175.84    6.53
   0   5 -15  140.28    5.61
   1  10 -15   -0.61    5.14
   1  12 -15   65.73    5.53
   1  13 -15   76.72    5.58
   0  17 -15   73.83    6.24
 -15  -7 -16    1.93    6.74
 -13  -6 -17    1.07    6.07
   0   8 -17    1.44    4.58
   0  14 -17   83.05    6.33
  -3   2 -18    8.75    4.69
  -1   6 -18    1.44    4.57
  -1  16 -18   50.65    6.49
  -3   3 -19   30.54    4.87
  -2   5 -19   14.69    5.74
  -1   8 -19    2.59    5.44
  -1  14 -19   -9.60    5.66
  -2  10 -21   77.98    6.40
  -2  11 -21   49.61    6.21
  -2  12 -21  112.64    6.06
  -7   1 -22    0.32    5.15
  -3   8 -22    9.88    6.16
  -5   5 -23   21.77    6.36
  -6   5 -24    6.16    5.83
  -5   7 -24   20.04    5.99
 -15  -4  26   75.53    4.97
 -12  -4  23   38.03    4.51
 -15  -7  21   93.72    4.64
  -9  -4  19   -4.46    4.20
 -17  -9  18    7.89    4.08
 -11  -6  18  111.82    4.46
 -16  -9  17   10.86    4.10
  -9  -5  17    8.30    3.38
  -5  -1  17  202.30    5.25
 -13  -8  16   42.32    4.07
 -14  -9  14   32.67    3.88
 -16 -10  13  179.38    4.97
  -7  -5  13   62.09    3.98
   1  13  12   75.16    4.72
 -18 -11  11   13.99    4.01
   1  15  11    4.56    3.91
 -12  -9  10   11.54    4.06
 -10  -8  10    2.97    3.40
  -7  -6  10   -1.45    3.59
  -3  -2  10  416.69    6.75
 -17 -11   9   55.05    4.44
  -2  -1   9  239.47    6.15
   2  14   8   60.76    4.57
   1  18   8    4.50    4.30
 -16 -11   7   11.14    4.26
 -13 -10   7   -3.29    3.99
 -11  -9   7    5.88    3.34
  -4  -4   7  227.78    5.00
   2  15   7    5.59    3.97
 -16 -11   6    9.19    4.37
 -13 -10   6   40.49    4.19
  -6  -6   6   92.82    4.22
   2  16   6    2.94    3.81
   1  19   6   30.12    4.28
  -7  -7   4   46.43    4.01
  -1  -1   4    2.14    3.36
   2  17   4  150.47    4.55
   3  10   3   19.03    3.67
   3  11   3  240.94    4.93
   3  12   3    6.39    3.49
   1  20   3    4.47    4.62
   3   9   2  198.84    4.92
   3  13   2   58.43    3.74
   2  18   2   -0.88    4.40
   3   8   1   71.58    4.24
   3  14   1  101.05    4.64
   2  18   1   11.07    4.36
   2   4   0   81.99    4.36
   3   8   0    4.87    3.75
   2  18   0   97.44    4.73
 -16 -11  -1   40.59    4.58
   2   4  -1    4.28    3.26
   3  15  -1   14.14    4.02
   2   4  -2    1.29    3.14
   3  15  -2    0.27    3.88
 -17 -11  -3    6.77    4.19
 -13 -10  -3    7.05    3.97
  -7  -7  -3   91.87    4.33
   2   4  -3    5.37    3.19
   3  15  -3   36.53    4.12
   3   8  -4   37.13    3.90
   2  18  -4   -0.97    4.27
 -14 -10  -5   -0.99    3.83
   1   2  -5  669.15   10.16
   3   8  -5    8.36    3.66
   3  14  -5  100.41    4.43
   2  18  -5   36.86    4.42
   3   9  -6   52.40    3.85
   3  13  -6   -1.41    3.33
   3  14  -6  104.20    4.48
   2  18  -6    4.51    4.23
 -12  -9  -7  101.89    4.65
   3  10  -7   21.38    3.53
   3  11  -7   44.68    3.63
   3  12  -7    9.66    3.38
   3  13  -7   34.48    3.48
   2  17  -8    1.13    4.40
  -7  -6  -9  572.11    7.73
   1  19  -9    4.88    4.77
   2  16 -10    3.98    3.68
 -12  -8 -11   13.09    4.00
   2  15 -11   64.93    4.05
   1  18 -11    4.01    3.89
   2   9 -12    4.03    3.40
   2  13 -12    5.93    3.97
   0   4 -14  162.40    4.75
   1   7 -14   18.01    3.52
   1   9 -15  301.32    4.80
   1  14 -15    0.70    3.68
   0   6 -16   51.69    3.76
   0  16 -16   -1.08    3.96
   0  15 -17    9.00    4.03
   0  11 -18   -0.60    3.70
  -1  15 -19   16.48    4.68
  -3   4 -20    1.42    4.02
  -2   9 -21   48.13    3.92
  -2  13 -21    4.36    3.94
  -2  14 -21    1.95    4.36
  -4   5 -22   -0.37    3.73
  -4   7 -23   19.41    4.39
  -7   5 -25   14.22    4.69
  -6   7 -25   96.97    5.17
  -5   7  24    5.05    8.50
  -7   8  27   33.14    8.91
  -6   6  25    8.92    7.93
  -5   5  23   40.73    7.30
  -4  13  23    2.81    8.39
   0   7  14    3.22    6.27
  -1   1  10    1.84    5.22
  -6  -4 -13   62.08    6.93
 -11  -4 -19    7.11    7.57
  -7   0 -21   -1.58    6.52
  -6   1 -21    9.61    6.63
  -9   3  27    7.39    6.13
  -8   5  27    1.70    5.98
 -14  -4  25    8.27    5.93
  -8   2  25   64.92    5.81
 -13  -4  24   50.47    6.31
  -6   3  23   27.89    5.87
 -10  -3  22   16.42    5.57
  -9  -2  22    8.75    5.59
  -8  -1  22  143.05    6.39
 -17  -8  20    8.83    6.63
 -11  -5  20   56.60    5.72
  -8  -3  19   -0.21    4.70
  -7  -2  19    1.71    4.85
  -2  15  19   28.48    6.07
 -15  -8  18    8.74    6.09
 -14  -8  17   17.18    5.36
 -12  -7  17    0.71    5.54
 -18 -10  15   44.86    6.90
 -15  -9  15   99.72    6.09
  -8  -5  15   40.44    5.09
   0  13  15    2.50    5.58
 -17 -10  14   12.41    5.88
 -12  -8  14   52.80    5.72
  -3   0  14  378.06    8.10
  -6  -4  13   56.63    5.32
  -5  -3  13   18.67    5.24
  -2   1  13   20.68    5.52
   0  17  13   19.07    6.01
 -13  -9  12  152.44    5.97
 -11  -8  12   33.34    4.70
   1   9  12   -3.60    5.03
   1  14  12  169.15    6.58
   0  18  12   -3.53    6.39
 -19 -11  11   17.43    6.54
 -15 -10  11    7.70    5.22
  -9  -7  11   32.08    5.06
   1   7  11  114.55    6.42
 -18 -11  10    2.06    5.57
  -6  -5  10   12.95    5.17
 -14 -10   9    5.85    5.38
   1   5   9   82.41    5.86
   2  11   9   15.72    5.01
   2  12   9   79.21    5.25
 -17 -11   8   11.21    5.93
  -8  -7   8  286.46    6.19
   2   8   8 1386.48   11.98
   2   7   7   60.38    5.73
  -9  -8   6  441.40    6.55
 -16 -11   5    4.50    6.23
 -13 -10   5   -2.20    5.57
   2  17   5   24.28    6.01
 -16 -11   4    4.30    6.28
   2   5   4   74.59    5.24
   3  11   4  121.93    5.60
   1  20   4   42.26    6.61
 -16 -11   3   -4.63    6.31
  -7  -7   3   36.86    5.39
   3   9   3   10.48    5.26
   3  13   3   11.41    4.67
   2  18   3    6.17    6.14
 -16 -11   2    5.01    6.35
   1   2   2  299.16   10.75
   3  14   2   -3.22    5.90
 -16 -11   1   66.70    6.62
 -16 -11   0    1.24    6.20
   3  15   0    4.53    5.60
 -13 -10  -1   48.20    5.94
 -17 -11  -2    3.48    5.93
 -13 -10  -2    3.04    5.67
  -7  -7  -2   87.33    5.55
   0   0  -3    0.75    4.79
 -18 -11  -4   29.32    7.02
 -11  -9  -4   -3.31    4.73
  -9  -8  -4   42.01    5.17
   2   4  -4   49.83    4.93
   3  15  -4   11.34    5.64
  -6  -6  -5  100.95    5.87
   3  15  -5   68.03    5.74
 -15 -10  -6   67.75    6.60
   3   8  -6  391.38    6.66
  -8  -7  -7   49.10    5.15
   3   9  -7    3.97    4.93
   3  14  -7  290.91    6.53
   2  18  -7   35.07    6.01
 -17 -10  -8    4.31    5.81
   2   5  -8   99.77    4.90
   3  10  -8   93.76    5.23
   3  11  -8  139.92    5.40
   3  12  -8    0.91    4.68
   1   3  -9  223.76    6.06
   2  17  -9   26.63    6.05
  -6  -5 -10  595.31    9.52
  -1   0 -10  500.13   10.97
   1  19 -10   14.23    6.39
 -16  -9 -11    2.46    5.76
  -8  -6 -11   21.61    4.99
   0   2 -11  585.81    8.70
   1   4 -11   86.81    5.65
   2   7 -11   34.99    5.16
 -13  -8 -12   15.00    5.40
   2  14 -12  164.43    5.95
   1  18 -12    2.63    5.98
   2  11 -13    9.46    4.62
   2  12 -13   45.39    5.65
   1  17 -13   -0.81    5.77
 -16  -8 -14   33.63    6.70
 -10  -6 -14   28.74    5.81
  -1   2 -14    4.24    4.98
   1  16 -14   10.87    5.88
  -2   1 -15  148.80    6.47
   1   8 -15    9.60    4.76
 -12  -6 -16   50.41    6.77
   1  11 -16    8.65    5.45
   0  17 -16    8.45    6.50
  -3   1 -17   33.31    5.18
   0   7 -17   -2.68    4.65
 -12  -5 -18    2.03    6.14
   0  10 -18    6.08    5.30
   0  12 -18   39.21    5.20
   0  13 -18    5.25    6.00
  -1   7 -19    5.81    5.60
  -2   6 -20   39.13    5.78
  -1  10 -20   37.90    5.36
  -1  11 -20   91.94    6.44
  -1  12 -20   17.94    5.96
  -5   2 -21   -0.19    5.43
  -2   8 -21    0.50    5.28
  -6   2 -22   18.32    5.37
  -3   7 -22   31.23    5.31
  -7   2 -23   81.58    6.88
  -6   3 -23   28.91    6.41
  -4  10 -24    9.65    6.54
 -10   3  28   51.69    4.65
 -14  -3  26   10.08    4.09
  -6   9  26    0.17    4.18
 -13  -3  25   27.61    4.55
 -15  -5  24   56.08    4.45
 -12  -3  24   33.52    4.63
  -8   1  24    9.30    3.89
 -16  -6  23   23.75    4.74
 -14  -5  23    8.85    4.25
 -11  -3  23    4.58    3.76
  -8   0  23   -0.60    4.01
 -17  -7  22    3.20    4.55
 -13  -5  22   73.07    4.65
 -16  -7  21   15.45    4.16
 -12  -5  21   10.44    3.88
 -15  -7  20   91.95    4.62
 -13  -6  20   17.83    3.86
 -10  -4  20   93.58    4.48
  -6   0  20    8.49    3.48
 -16  -8  19    2.79    4.14
 -14  -7  19   24.79    3.84
 -12  -6  19   34.26    4.04
 -18  -9  18   10.54    4.46
 -13  -7  18   43.31    4.01
 -10  -5  18   28.30    4.26
 -17  -9  17   93.40    4.61
  -8  -4  17    1.43    3.45
  -7  -3  17   69.10    3.99
  -6  -2  17  147.42    4.64
 -16  -9  16   49.37    4.54
 -10  -6  16   67.01    3.70
 -13  -8  15    5.06    3.91
 -11  -7  15   66.82    4.40
  -7  -4  15   31.66    3.70
  -5  -2  15  273.67    5.53
   0  14  15  211.15    5.43
 -18 -10  14   11.39    4.06
  -9  -6  14    6.12    3.42
   0  16  14   -5.42    4.42
 -17 -10  13   16.22    4.11
 -14  -9  13   -9.12    3.83
 -10  -7  13   49.08    3.63
 -16 -10  12    6.88    4.34
  -8  -6  12   50.33    3.82
  -3  -1  12   68.98    4.54
 -13  -9  11   13.14    4.10
   1  16  11   12.00    4.53
 -19 -11  10   -5.37    4.60
 -15 -10  10    6.55    3.66
  -5  -4  10   90.57    4.36
  -4  -3  10  982.81    9.02
   1  17  10   34.34    4.46
 -18 -11   9   -2.97    4.11
 -12  -9   9    9.56    4.03
 -10  -8   9    4.10    3.43
  -7  -6   9    6.46    3.60
   2  10   9   78.18    4.19
   2  13   9   37.90    4.50
   1  18   9    5.04    4.25
 -18 -11   8   -0.64    4.03
 -14 -10   8    0.21    3.87
   2  15   8    3.37    3.96
 -17 -11   7   27.91    4.30
 -14 -10   7   70.56    4.27
   2  16   7    5.51    3.85
   1  19   7    4.81    4.11
 -17 -11   6    7.88    4.23
 -11  -9   6    7.64    3.40
  -5  -5   6    4.99    2.92
  -4  -4   6   94.26    3.98
  -3  -3   6   36.78    3.65
   2   6   6  143.66    4.93
   2  17   6   28.70    4.68
 -17 -11   5   11.38    4.29
 -11  -9   5    4.61    3.44
  -9  -8   5  195.69    4.53
  -6  -6   5   30.16    3.88
   1  20   5   17.06    4.70
 -13 -10   4    5.24    4.08
  -9  -8   4  568.90    6.03
   3  10   4   44.97    3.89
   3  12   4    5.33    3.36
   3  13   4   81.67    3.85
   2  18   4    4.89    4.26
 -13 -10   3    7.83    4.01
   3  14   3  276.97    5.29
 -13 -10   2   -1.34    3.98
  -7  -7   2  141.83    4.60
   3   8   2  397.33    6.19
   3  15   2    3.14    3.96
 -13 -10   1   40.39    4.20
  -7  -7   1    5.87    3.70
   2   4   1   38.43    3.86
   3  15   1    6.40    4.03
   2  19   1    0.12    4.22
 -17 -11   0   35.72    4.40
 -13 -10   0   12.08    4.13
  -7  -7   0  142.88    4.55
   3  16   0   -0.04    3.88
   2  19   0    6.60    4.07
 -17 -11  -1    6.13    4.14
  -7  -7  -1    9.23    3.72
   3   7  -1  204.26    4.73
   3  16  -1    5.71    3.74
   2  19  -1    4.05    4.08
   3   7  -2  197.16    4.60
   3  16  -2    8.41    3.85
   2  19  -2    4.28    4.09
 -18 -11  -3    4.22    4.07
 -11  -9  -3   22.81    3.51
  -9  -8  -3    1.89    3.61
   3   7  -3  495.92    6.15
   3  16  -3   32.20    3.93
   2  19  -3    0.96    4.09
 -14 -10  -4   17.03    3.97
   3   7  -4  265.07    4.96
   3  16  -4   59.23    4.09
   2  19  -4    5.03    4.02
   2   4  -5  258.96    5.60
   2  19  -5    8.67    4.04
 -12  -9  -6   42.15    4.35
   3  15  -6   -3.81    3.93
 -16 -10  -7   28.46    4.52
 -10  -8  -7   33.01    3.60
   3   8  -7  108.53    4.28
   3  15  -7   -2.40    3.88
 -13  -9  -8    6.45    3.97
   3   9  -8   87.15    4.03
   3  13  -8   53.65    3.49
   3  14  -8  255.87    5.11
   2  18  -8   -3.95    4.12
 -14  -9  -9    6.13    3.74
 -11  -8  -9  118.32    4.84
   3  10  -9   16.12    3.50
   3  11  -9   26.29    3.51
   3  12  -9   54.08    3.56
   3  13  -9   -3.11    3.98
 -15  -9 -10   48.79    4.73
   2   6 -10    0.22    3.61
   2  17 -10    5.14    4.24
 -10  -7 -11   12.80    4.23
   2  16 -11   19.29    4.33
   1  19 -11   15.91    4.58
   2   8 -12   37.98    3.61
   2  15 -12   81.59    4.08
   0   3 -13   10.10    3.67
   2   9 -13   18.13    3.45
   2  10 -13   50.34    3.59
   2  13 -13   -3.71    3.84
   2  14 -13   19.20    3.82
   1   6 -14   32.55    3.67
   1  17 -14   18.10    4.03
   1  15 -15   22.41    4.30
   1  10 -16    3.61    3.90
   1  12 -16   44.00    3.99
   1  13 -16   88.37    4.14
   0  16 -17   38.79    4.08
   0   9 -18   15.90    3.99
   0  14 -18   47.43    4.25
  -1   9 -20   -1.93    3.79
  -1  13 -20    1.98    4.09
  -1  14 -20    5.95    3.82
  -3   5 -21   42.23    4.26
  -3  10 -23   18.59    4.17
  -3  11 -23    8.43    3.95
  -3  12 -23   -0.42    4.52
  -5   6 -24   -2.09    4.20
  -4   9 -24   17.26    4.03
  -1   8  17   16.74    6.18
   0   9  15   11.93    6.04
  -8  -4 -16   12.94    7.13
  -6   0 -20   78.78    7.71
  -5   1 -20   19.88    7.05
  -8   0 -22    0.74    7.63
  -8   1 -23    0.52    7.39
  -9   5  28   22.95    6.46
  -9   2  26   12.49    6.40
  -7   4  25   64.89    5.94
 -10  -2  23    1.64    5.46
  -9  -1  23    2.61    5.61
 -15  -6  22   17.69    5.95
  -6   2  22   15.68    5.93
 -14  -6  21   23.39    6.28
  -6   1  21   66.76    6.39
  -1  15  17    3.57    6.22
  -1  17  16  114.67    7.28
  -6  -3  15  217.00    6.16
 -15  -9  14   60.15    5.47
 -12  -8  13   45.34    5.89
   1  15  12   23.91    5.55
 -16 -10  11  127.71    6.58
 -11  -8  11   61.00    4.96
  -2   0  11    1.13    4.14
   2   9   9   38.77    5.40
   2  14   9  138.59    6.38
   1  19   8   19.31    6.85
  -8  -7   7  232.06    6.07
  -2  -2   5  281.14    7.56
   3  11   5  181.90    5.93
   3  12   5  158.15    5.58
   2  18   5   -1.71    6.15
 -17 -11   4  139.59    6.54
 -11  -9   4  102.94    5.11
  -6  -6   4   79.82    5.74
   3   9   4    8.64    5.24
   3  14   4   23.27    5.97
 -17 -11   3   75.44    6.34
   3  15   3   18.56    5.68
 -17 -11   2  191.57    6.66
   2  19   2   -7.23    5.96
 -17 -11   1   34.79    6.18
   3  16   1   -0.03    5.45
   3   7   0  744.34    8.24
 -18 -11  -2   -4.73    5.82
 -11  -9  -2    1.11    4.72
  -9  -8  -2  578.72    7.36
 -14 -10  -3    1.51    5.48
  -6  -6  -4   80.10    5.69
 -15 -10  -5   70.25    5.51
   3   7  -5  306.90    5.81
   3  16  -5   69.94    5.61
  -5  -5  -6    2.75    5.17
   1   2  -6 1138.37   12.83
   3  16  -6   25.18    5.40
   2  19  -6   11.55    5.69
  -9  -7  -9   24.40    5.01
   3  14  -9  152.98    6.04
   2  18  -9   -5.10    5.75
 -17  -9 -11   64.95    6.95
  -7  -5 -12   -0.11    4.85
   2  16 -12   10.66    6.00
 -15  -8 -13    2.24    5.91
   1   5 -13   16.28    4.97
   1  18 -13   14.07    6.43
 -14  -7 -15  112.47    6.80
 -11  -6 -15    7.92    5.58
  -9  -5 -15    2.24    5.64
   1   7 -15  157.21    5.51
   1  16 -15    6.40    5.74
   1   9 -16   -2.68    4.57
   1  14 -16    2.10    6.20
  -1   4 -17   17.11    4.86
  -1   5 -18  168.21    5.55
   0   8 -18  243.71    6.53
   0  15 -18   -1.33    5.62
 -14  -5 -19   34.60    6.86
  -2   7 -21   59.61    5.66
  -5   3 -22   45.62    5.68
  -2  10 -22    0.41    6.03
  -2  11 -22    6.12    5.72
  -2  12 -22   35.66    5.82
  -2  13 -22    0.21    6.40
  -4   6 -23  120.31    6.84
  -3   9 -23   58.58    5.95
  -8   2 -24   22.94    6.11
  -7   3 -24    6.66    5.92
  -6   6 -25   29.30    5.81
  -5   8 -25   30.38    6.63
 -11   2  28   11.41    4.16
 -14  -2  27   87.86    5.07
 -10   2  27   48.92    4.71
 -13  -2  26   68.13    4.66
 -15  -4  25   20.02    4.71
 -12  -2  25   76.81    4.84
  -9   1  25   12.34    3.84
 -11  -2  24   20.79    3.87
 -10  -1  24   20.18    3.94
  -9   0  24   50.49    4.33
 -12  -4  22   25.08    3.89
 -11  -4  21    6.43    3.89
  -9  -3  20  230.06    5.30
  -8  -2  20    4.76    3.26
  -7  -1  20   59.46    3.89
 -17  -8  19    5.06    4.00
 -11  -5  19   23.54    4.09
 -16  -8  18   33.83    4.55
  -9  -4  18    4.66    3.40
  -5   0  18   25.45    3.78
 -18  -9  17   10.69    4.88
 -15  -8  17   17.20    4.38
 -13  -7  17   68.15    4.17
 -11  -6  17   99.82    4.42
 -17  -9  16   20.16    4.23
 -14  -8  16   64.54    4.03
 -12  -7  16   -1.90    3.99
  -9  -5  16    7.89    3.42
  -4   0  16  742.41    8.71
 -16  -9  15    8.61    4.31
   0  15  15   15.83    4.52
 -19 -10  14   -0.43    4.51
 -13  -8  14   33.57    4.02
 -11  -7  14   95.50    3.80
  -8  -5  14  141.59    4.24
 -18 -10  13   59.56    4.36
   1  11  13   39.18    4.58
   1  12  13   19.37    4.22
   0  18  13   36.15    4.98
 -17 -10  12   19.51    4.21
 -14  -9  12    6.60    3.89
 -10  -7  12  206.08    4.41
  -7  -5  12   59.25    3.92
  -8  -6  11  244.23    4.87
   1  17  11    7.21    4.38
 -16 -10  10    5.55    4.37
 -13  -9  10   53.68    4.10
  -9  -7  10  161.11    4.36
   1  18  10    3.13    4.09
 -15 -10   9    4.03    3.67
  -6  -5   9   14.56    3.73
   2  15   9   61.21    4.31
 -19 -11   8    3.12    4.47
 -15 -10   8   38.30    3.91
 -12  -9   8    4.15    3.21
 -10  -8   8    5.88    3.43
  -7  -6   8    3.02    3.52
   2  16   8   42.30    4.06
 -19 -11   7    8.08    4.60
 -18 -11   7   23.71    4.19
 -12  -9   7   18.89    3.37
   2  17   7   33.26    4.71
 -18 -11   6    8.77    4.07
 -14 -10   6   10.14    3.99
  -8  -7   6  419.29    5.63
 -18 -11   5   25.18    3.97
 -14 -10   5  204.23    4.82
  -5  -5   5   -1.51    2.95
   3  10   5  163.38    4.74
   3  13   5    2.15    3.34
 -18 -11   4   13.92    4.22
 -14 -10   4   -2.76    3.88
   3  15   4    4.83    4.00
 -11  -9   3   17.65    3.49
  -9  -8   3  215.01    4.63
  -6  -6   3  370.01    5.50
   3   8   3  232.58    5.36
   2  19   3   42.47    4.29
 -11  -9   2  136.91    4.11
  -9  -8   2   48.18    3.81
   3  16   2    7.40    3.88
 -18 -11   1   46.92    4.44
 -11  -9   1   33.56    3.56
  -9  -8   1  169.77    4.47
   3   7   1   66.00    3.63
 -18 -11   0   10.31    4.15
 -11  -9   0   53.90    3.75
  -9  -8   0  131.26    4.35
   3  17   0    2.15    3.80
 -18 -11  -1   22.71    4.14
 -14 -10  -1    1.26    3.97
 -11  -9  -1   64.18    3.66
  -9  -8  -1   38.23    3.78
   3  17  -1  149.70    4.41
   2  20  -1   53.35    4.97
 -19 -11  -2   12.48    4.60
 -14 -10  -2   76.46    4.28
   3  17  -2   -4.41    3.72
   2  20  -2   45.55    4.90
   3  17  -3   74.05    4.02
   2  20  -3   43.43    5.05
 -15 -10  -4    4.24    3.72
   3  17  -4    6.36    3.65
   2  20  -4   16.49    4.73
 -12  -9  -5   13.42    4.07
   3  17  -5    1.17    3.60
 -16 -10  -6   42.01    4.48
 -10  -8  -6    6.21    3.36
  -8  -7  -6   -1.54    3.48
   2   4  -6  125.39    4.39
   3   7  -6  220.14    4.98
 -17 -10  -7   37.19    4.34
 -13  -9  -7    0.50    3.87
  -4  -4  -7  179.38    5.80
   3  16  -7    9.86    3.82
   2  19  -7    5.19    3.94
  -7  -6  -8  100.69    4.52
   3   8  -8 1319.24    8.59
   3  15  -8   47.15    4.02
   2  19  -8    6.11    4.05
   2   5  -9  190.08    4.53
   3   9  -9   31.86    3.62
   3  15  -9   10.34    3.86
 -12  -8 -10    6.94    3.90
   3  10 -10   17.57    3.46
   3  11 -10    0.79    3.33
   3  12 -10  162.03    4.03
   3  13 -10   41.65    4.23
   3  14 -10  224.64    4.87
   2  18 -10   14.90    3.92
   2   6 -11   56.88    3.90
   2  17 -11   13.46    4.26
 -14  -8 -12  129.31    5.27
 -11  -7 -12   32.00    4.27
   2   7 -12   -3.46    3.47
   2   8 -13   62.67    3.75
   2  15 -13    7.33    3.70
   2  10 -14  153.54    4.08
   2  11 -14  275.14    5.02
   2  12 -14   39.23    3.99
   2  13 -14   12.55    3.85
   2  14 -14   97.66    4.22
   1  18 -14   36.89    4.69
   1  17 -15   -4.35    3.90
  -1   3 -16  247.70    5.47
   0   5 -16   28.10    3.56
   1   8 -16    2.57    3.24
   1  15 -16   98.07    4.56
   0   6 -17   81.92    3.88
   1  11 -17   46.99    4.04
   1  12 -17   35.38    3.96
   1  13 -17   34.05    3.87
  -2   3 -18    4.85    3.30
   0  16 -18   -4.13    4.60
  -2   4 -19   74.20    3.94
  -1   6 -19   45.30    4.28
   0  10 -19   13.60    3.82
   0  11 -19  122.97    4.31
   0  12 -19    2.42    4.27
   0  13 -19   -2.54    4.29
  -4   2 -20    4.61    3.96
  -1   8 -20    3.27    3.84
  -4   3 -21   14.29    4.01
  -1  12 -21    2.05    4.12
  -3   6 -22    1.42    3.74
  -2   9 -22   11.87    4.30
  -5   4 -23   63.82    4.23
  -3   8 -23   -2.59    4.28
  -6   4 -24   36.05    4.56
  -4   8 -24   56.78    4.21
  -4  -3 -11    0.68    6.08
 -11  -5 -17   11.54    6.58
 -10  -4 -18    3.94    6.59
 -13   0  28   28.38    6.72
 -12   1  28   -1.46    6.88
 -13  -1  27   -1.65    5.70
 -12   0  27    0.62    5.86
 -11   1  27    6.96    5.92
 -12  -1  26    5.77    6.02
 -11   0  26   11.10    6.20
 -10   1  26    2.96    6.20
  -7   6  26   47.12    6.56
 -11  -1  25   -1.02    6.36
 -10   0  25   -5.03    5.77
 -16  -5  24   86.03    6.91
 -14  -4  24    7.33    6.04
 -17  -6  23   59.72    6.49
 -13  -4  23   23.70    6.30
  -5   4  22  129.47    7.06
 -17  -7  21    8.34    6.65
 -10  -3  21   -6.56    5.61
 -16  -7  20   29.97    5.89
 -12  -5  20   63.83    5.77
  -2  12  20    8.93    6.44
 -15  -7  19   61.55    6.45
 -14  -7  18   41.58    5.40
 -12  -6  18   23.12    5.50
  -1  11  18    5.55    5.62
  -1  12  18   11.69    5.57
  -1  13  18    2.21    6.40
  -1  16  17    0.32    5.77
 -10  -6  15    5.13    4.70
   0  17  14    2.42    5.93
 -15  -9  13   -5.57    5.29
  -9  -6  13  196.94    5.66
   1  10  13    7.66    4.97
   1  13  13   12.60    5.80
 -12  -8  12   15.53    5.75
  -6  -4  12   24.23    5.18
  -4  -2  12  442.79    7.74
   1   8  12    3.74    5.04
   1  16  12    1.87    6.34
 -17 -10  11   -4.68    6.03
 -11  -8  10    1.96    4.74
   2  11  10    5.38    4.82
   2  12  10   11.88    4.83
   2  13  10   40.62    6.08
  -3  -2   9    9.35    4.35
   1  19   9    0.58    6.83
 -15 -10   7    2.12    5.37
 -10  -8   7  122.99    5.38
 -19 -11   6   -6.46    6.57
   2  18   6   -3.70    6.18
  -4  -4   5    0.65    4.21
   3  14   5  150.96    6.46
   2  19   4    0.82    5.87
 -18 -11   3    6.45    5.89
 -14 -10   3  195.20    6.21
   3  16   3    2.57    5.42
 -18 -11   2   26.80    5.96
 -14 -10   2   27.71    5.63
  -6  -6   2   70.22    4.69
   2   4   2   61.60    5.30
 -14 -10   1   98.18    5.89
   3  17   1   50.15    5.49
   2  20   1   18.43    6.71
 -19 -11   0   17.24    6.71
 -14 -10   0   56.41    5.71
   2  20   0   64.10    6.86
 -19 -11  -1   -3.21    6.54
 -15 -10  -3   -0.04    5.31
  -6  -6  -3    1.90    5.23
 -12  -9  -4   -6.79    5.78
 -16 -10  -5   -2.19    6.24
   2  20  -5   19.34    6.48
 -17 -10  -6   18.28    5.99
   3  17  -6    9.10    5.66
 -18 -10  -7   10.43    6.67
   3   7  -7   13.80    5.17
 -14  -9  -8   68.89    5.79
 -11  -8  -8   17.05    5.95
   3  16  -8   24.53    5.34
 -15  -9  -9   -1.60    6.24
   0   1  -9  108.41    5.75
   2  19  -9   10.33    6.52
 -16  -9 -10    8.90    5.98
   1   3 -10 1126.73   10.42
   3   9 -10    4.74    4.87
 -13  -8 -11   27.84    5.48
   3  11 -11    5.64    4.60
   3  12 -11    5.69    4.61
   3  13 -11   56.62    5.74
  -9  -6 -12   20.89    4.77
   1   4 -12   33.35    5.23
   2  17 -12    2.99    5.82
 -16  -8 -13   19.66    6.24
 -12  -7 -13    2.60    5.37
   2  16 -13   14.11    6.11
 -13  -7 -14    6.88    6.30
   2   9 -14    3.91    4.66
   0   4 -15  153.90    5.85
 -10  -5 -16    5.30    5.56
   1  16 -16    0.71    5.62
 -14  -6 -17    1.30    5.84
  -9  -4 -17   33.64    6.06
   1  10 -17   19.71    5.56
   1  14 -17   19.27    6.08
   0   9 -19   -1.15    5.40
   0  14 -19    8.33    5.67
 -13  -4 -20   12.25    6.85
  -2   5 -20  127.69    6.16
  -1  10 -21   28.99    6.27
  -1  11 -21   47.03    6.06
  -1  13 -21    3.18    5.54
  -4   4 -22   65.30    5.69
  -8   3 -25   46.58    6.94
  -7   4 -25   46.50    6.02
 -15  -3  26   49.84    4.87
  -8   4  26   76.26    5.21
  -7   3  24   -0.04    3.93
 -15  -5  23    7.32    4.07
 -16  -6  22    3.18    4.05
 -14  -5  22   55.01    4.57
 -11  -3  22    2.56    3.88
 -15  -6  21   12.45    4.27
 -13  -5  21   52.37    3.93
  -9  -2  21    3.60    4.08
  -7   0  21   -0.81    4.20
 -14  -6  20   10.81    4.52
 -18  -8  19   15.74    4.74
 -13  -6  19   39.58    4.01
 -10  -4  19   27.23    4.17
  -5   1  19   52.25    4.08
 -17  -8  18   14.40    4.23
  -8  -3  18   75.77    3.90
  -7  -2  18    1.05    3.45
  -6  -1  18  342.09    5.79
 -16  -8  17   16.19    4.38
 -10  -5  17    2.22    3.28
 -18  -9  16   -6.22    4.00
 -15  -8  16   -4.65    3.67
 -11  -6  16    7.10    4.13
  -8  -4  16   91.34    4.00
 -17  -9  15   67.73    4.51
 -14  -8  15   10.71    3.86
 -12  -7  15   28.93    4.05
   0  16  15   -0.11    4.25
 -16  -9  14    8.72    4.24
  -7  -4  14  484.18    6.12
  -4  -1  14  198.96    5.41
 -19 -10  13   -6.42    4.59
 -13  -8  13   19.25    4.05
   1  14  13   33.35    4.20
 -18 -10  12    8.65    4.01
 -15  -9  12   66.24    4.00
  -5  -3  12   10.81    3.70
 -14  -9  11   -5.18    3.90
 -10  -7  11   66.57    3.77
 -17 -10  10   62.28    4.53
   2  10  10   36.05    3.89
   2  14  10   17.21    4.20
 -16 -10   9   35.91    3.70
 -13  -9   9   13.03    3.98
 -11  -8   9    5.69    3.35
  -9  -7   9  150.52    4.27
  -5  -4   9  440.49    5.98
  -4  -3   9  324.43    5.73
   2  16   9    5.75    3.79
 -16 -10   8    5.23    3.67
   2   7   8   22.76    3.92
   2  17   8    3.00    4.43
  -7  -6   7  185.15    4.73
   2  18   7   -4.64    4.28
 -15 -10   6   19.42    3.84
 -12  -9   6    2.96    3.31
 -10  -8   6   45.81    3.74
   3  11   6  101.33    4.17
   3  12   6    5.19    3.43
   3  13   6    6.38    3.38
   3  14   6    1.30    4.06
 -19 -11   5   29.58    4.75
 -15 -10   5  138.78    4.44
 -12  -9   5   35.31    3.54
  -8  -7   5  697.82    6.70
  -3  -3   5   67.38    4.05
   2   5   5  196.40    5.76
   3   9   5  526.85    6.81
   3  15   5   10.12    4.03
   2  19   5   76.63    4.45
 -19 -11   4   54.84    4.99
  -5  -5   4  256.88    5.09
   3   8   4  604.27    7.33
   3  16   4    5.50    3.80
 -19 -11   3   17.99    4.78
  -1  -1   3    4.57    3.56
   3  17   3   18.12    3.89
   2  20   3    1.22    4.62
 -19 -11   2   61.64    5.11
   3   7   2  263.39    5.20
   3  17   2   35.42    4.01
   2  20   2   54.76    4.92
 -19 -11   1    7.04    4.68
  -6  -6   1  208.45    4.61
  -6  -6   0    1.16    2.97
   3  18   0   93.57    4.77
  -6  -6  -1    6.46    3.82
   3   6  -1   48.75    3.56
   3  18  -1    8.01    4.28
 -15 -10  -2   14.02    3.85
  -6  -6  -2  120.26    4.66
   3   6  -2   44.22    3.47
   4  12  -2   44.22    3.67
   3  18  -2   57.06    4.43
 -12  -9  -3    1.16    4.04
   3   6  -3  196.38    4.67
   4  12  -3  156.31    4.18
   3  18  -3    2.52    4.21
 -16 -10  -4   22.09    4.43
   3   6  -4   44.41    3.36
   4  12  -4    6.57    3.38
   3  18  -4   13.82    4.28
 -10  -8  -5    4.95    3.48
  -8  -7  -5  175.06    4.84
  -5  -5  -5   64.47    3.81
   3   6  -5   78.99    3.69
   3  18  -5   32.99    4.38
 -18 -10  -6   25.72    4.84
 -13  -9  -6   -2.01    3.92
   3  18  -6    3.26    4.25
   1   2  -7  192.39    5.70
   2   4  -7   37.52    3.39
   3  17  -7   37.59    4.52
  -9  -7  -8   21.23    3.59
   3   7  -8    7.74    3.62
   3  17  -8    8.17    4.27
   3   8  -9    4.24    3.53
   3  16  -9   14.97    3.65
 -17  -9 -10   53.14    5.10
 -10  -7 -10  375.82    5.99
   2   5 -10  206.34    5.00
   3  15 -10   58.14    3.99
   3  16 -10   35.68    3.91
   2  19 -10    7.36    4.59
   3  10 -11   13.97    3.36
   3  14 -11    6.06    3.83
   3  15 -11    7.67    3.72
   2  18 -11   -0.90    4.03
   3  12 -12  160.55    4.65
   2  18 -12    2.06    3.88
   2   7 -13   59.88    3.86
   2  17 -13   11.82    4.09
   2  15 -14   38.63    4.41
   2  16 -14   -6.76    4.20
 -15  -7 -15   -1.10    4.15
   1   6 -15  432.96    5.76
   2  10 -15   18.13    3.28
   2  11 -15    3.90    3.98
   2  12 -15   13.28    3.84
   2  13 -15    8.28    3.75
   2  14 -15  213.00    4.60
   1   7 -16   21.85    3.44
   1  17 -16   84.22    5.02
   1   9 -17  251.97    5.11
   1  15 -17    3.67    4.11
   0   7 -18   12.19    3.31
   0  15 -19   20.82    4.70
  -1   7 -20  156.22    4.72
  -2   6 -21  335.82    5.79
  -1   9 -21    0.44    3.69
  -1  14 -21   11.33    4.54
  -2   8 -22   -0.12    3.68
  -2  12 -23   28.73    4.80
  -4   7 -24    4.26    4.16
  -3  10 -24    4.48    3.90
  -3  11 -24   24.21    4.56
  -5   7 -25    3.73    3.99
  -1   3  13  374.20   14.41
 -12  -3 -21    2.74    8.05
  -2  11  20  109.81    7.98
  -2  -1 -11  148.37    9.82
  -5   0 -19   -0.51    7.01
  -9   1 -24    0.41    6.87
  -9   4  27   19.97    6.17
 -16  -4  25   15.85    6.52
 -14  -3  25    9.36    5.82
 -13  -3  24   60.84    6.31
  -6   5  24  110.86    6.69
 -12  -3  23   11.26    5.26
  -7   2  23    1.00    5.63
  -7   1  22   10.43    5.71
  -8  -1  21    9.28    5.79
  -5   3  21   77.09    6.52
  -5   2  20    2.78    4.82
  -2  13  20    0.84    6.06
  -2  14  20    4.26    5.98
  -1  14  18   12.30    6.27
  -4   1  17   57.82    5.59
 -19  -9  16   18.00    6.46
 -13  -7  16  -11.63    5.49
  -7  -3  16   10.12    5.07
  -5  -1  16    9.94    5.16
   0  11  16   52.33    6.15
   0  12  16   50.15    6.07
   0  13  16    4.37    5.44
  -3   1  15   49.10    5.74
   0   8  15   13.20    5.10
  -6  -3  14  214.97    6.17
  -5  -2  14   96.32    5.76
 -11  -7  13   -3.70    4.71
   1  15  13   11.95    6.04
 -19 -10  12   30.98    6.61
 -18 -10  11   41.41    5.88
 -12  -8  11    5.80    5.15
  -7  -5  11  346.21    6.50
   1  18  11   -5.19    5.86
 -14  -9  10    2.79    5.44
  -8  -6  10   41.76    5.16
   2  15  10    2.39    5.59
   1  19  10    3.86    6.71
   2   8   9  134.31    6.32
 -13  -9   8   15.31    5.59
  -6  -5   8   62.48    5.48
  -2  -1   8   81.45    5.47
   1   4   8   70.92    6.05
  -1   0   7   -0.36    4.51
   1   3   6  266.42   10.32
   3  10   6    7.22    5.08
   2  19   6   16.61    5.90
 -10  -8   5   73.98    5.25
 -15 -10   4    4.67    5.45
 -12  -9   4   16.45    4.72
  -8  -7   4  197.91    6.03
  -5  -5   3  144.06    5.31
   3  18   1    8.03    6.14
 -15 -10   0   92.64    5.75
   3   6   0   40.20    4.61
 -15 -10  -1   55.85    5.79
   4  12  -1   55.07    5.06
   4  13  -1    2.20    4.67
 -12  -9  -2   15.08    5.39
   4  11  -2  223.66    5.83
   4  13  -2   21.51    4.74
   4  11  -3    7.66    4.97
   4  13  -3   24.73    4.74
 -10  -8  -4   62.60    5.23
  -8  -7  -4   64.37    5.52
   0   0  -4  390.34   14.63
   4  11  -4    2.29    4.90
   4  13  -4   16.64    4.70
 -17 -10  -5   79.76    6.28
   4  12  -5   12.12    4.73
   4  13  -5    4.12    4.62
 -14  -9  -7   50.41    5.80
 -11  -8  -7   39.59    4.91
  -3  -3  -7  626.79   12.63
   3  18  -7   12.64    5.94
 -16  -9  -9    7.45    5.96
 -12  -8  -9   10.14    5.69
  -6  -5  -9  148.23    6.41
   3  17  -9    3.42    6.15
  -8  -6 -10   14.51    4.98
   3   8 -10  666.34    7.36
   3   9 -11   14.82    4.85
 -15  -8 -12   18.59    6.20
   0   2 -12   58.95    5.64
   2   6 -12   14.20    5.00
   3  11 -12    1.40    4.56
   3  13 -12   29.45    5.54
  -1   1 -13    5.23    5.09
   0   3 -14   22.65    5.16
   1   5 -14    5.17    4.94
   2   8 -14  519.10    6.67
  -1   2 -15    4.07    4.95
   2  15 -15    0.50    6.07
 -13  -6 -16   38.59    6.45
  -2   2 -17    4.55    4.85
   1  16 -17    4.61    5.52
   1  11 -18    1.73    5.30
   1  12 -18    4.58    5.17
   1  13 -18    2.11    6.09
  -4   1 -19   18.00    4.86
   0   8 -19    8.63    5.50
  -3   3 -20  265.71    7.32
   0  11 -20   19.17    5.80
   0  12 -20    4.91    6.02
   0  13 -20   17.71    5.87
  -3   4 -21    4.82    5.52
  -4   5 -23    7.62    5.15
  -3   7 -23    2.48    6.15
  -2  11 -23    6.39    5.53
  -5   5 -24   30.28    6.21
  -9   2 -25   68.55    7.12
  -6   5 -25   -2.69    5.68
  -4   9 -25   57.71    6.73
 -10   4  28   91.62    5.00
 -14  -2  26    2.80    4.03
 -15  -4  24   78.56    4.45
 -16  -5  23   15.97    4.03
 -14  -4  23   27.73    4.47
 -17  -6  22    3.15    4.72
 -10  -2  22   35.08    4.14
  -8   0  22   28.32    4.39
 -16  -6  21   33.56    4.21
 -12  -4  21   63.17    4.12
 -17  -7  20   12.74    3.96
 -11  -4  20    5.56    3.95
 -16  -7  19   35.44    4.32
  -9  -3  19   84.97    3.92
 -18  -8  18   63.98    4.23
 -15  -7  18   21.50    4.47
 -13  -6  18   35.58    3.97
 -11  -5  18    4.03    4.01
 -17  -8  17    7.43    4.12
 -14  -7  17    3.61    3.77
 -12  -6  17   12.42    3.98
  -9  -4  17    6.01    3.34
 -16  -8  16  196.08    5.04
  -6  -2  16   78.64    4.18
   0  14  16   92.35    5.25
 -18  -9  15   38.04    4.31
 -15  -8  15   10.73    3.73
  -9  -5  15    2.31    3.50
 -17  -9  14   57.38    4.38
 -14  -8  14   36.12    4.06
 -12  -7  14   65.86    4.37
 -10  -6  14   22.16    3.53
 -16  -9  13   11.92    4.39
  -8  -5  13  105.81    4.17
 -13  -8  12    7.31    4.03
  -9  -6  12   27.60    3.67
   1  17  12   -0.89    4.30
 -19 -10  11    8.04    3.84
 -15  -9  11   35.82    3.82
 -18 -10  10    8.36    4.24
 -12  -8  10   95.61    3.72
 -17 -10   9    2.20    4.28
 -14  -9   9    4.41    3.83
   2  17   9    9.57    4.47
 -17 -10   8   47.92    4.55
 -11  -8   8    9.16    3.41
  -9  -7   8   -1.12    3.56
   2  18   8   -2.92    4.31
 -16 -10   7    9.43    3.80
 -13  -9   7    4.16    3.98
   2   6   7  122.89    4.81
   3  11   7   98.27    4.23
   3  12   7  137.85    4.39
   3  13   7   16.42    4.28
   3  14   7   -3.25    4.17
 -16 -10   6    4.17    3.75
  -7  -6   6   58.58    4.07
   3  15   6  120.89    4.57
 -16 -10   5   87.55    4.23
   3  16   5    1.52    3.89
 -10  -8   4    1.43    3.54
  -4  -4   4   41.61    3.56
  -3  -3   4   58.21    4.06
  -2  -2   4   22.72    3.69
   3  17   4   90.49    4.24
   2  20   4    5.42    4.67
 -15 -10   3  221.81    4.68
 -12  -9   3    0.54    3.29
 -10  -8   3   22.20    3.60
  -8  -7   3  350.06    5.45
   3   7   3  230.17    5.08
   3  18   3   26.06    4.45
 -15 -10   2   20.03    4.14
 -12  -9   2   16.15    3.41
  -5  -5   2  179.07    4.63
   3  18   2   10.09    4.43
 -15 -10   1  137.21    4.56
 -12  -9   1    6.03    3.36
   4  12   1   21.49    3.56
   4  13   1   10.11    3.32
 -12  -9   0    8.05    3.27
   4  11   0  356.37    5.36
   4  12   0   60.65    3.78
   4  13   0    9.40    3.34
   4  14   0   26.88    4.15
   3  19   0   -9.49    4.22
 -12  -9  -1   -4.32    3.28
   4  10  -1  186.73    4.65
   4  11  -1   69.20    3.88
   4  14  -1   10.28    4.14
   4  15  -1   30.99    4.09
   3  19  -1   48.08    4.40
 -16 -10  -2   15.11    4.54
   4  10  -2  439.02    5.74
   4  14  -2   63.00    4.39
   4  15  -2   30.57    4.10
   3  19  -2   37.77    4.33
 -16 -10  -3   24.77    4.57
 -10  -8  -3   38.64    3.71
  -8  -7  -3 1191.24    8.99
   4  10  -3   37.95    3.70
   4  14  -3    0.32    4.08
   4  15  -3    5.47    3.98
   3  19  -3   35.94    4.33
 -17 -10  -4    3.02    4.30
 -13  -9  -4   11.78    4.01
  -5  -5  -4   98.15    4.17
   4  10  -4  475.30    5.68
   4  14  -4  219.49    4.87
   4  15  -4   11.06    3.98
   3  19  -4   51.54    4.33
 -18 -10  -5   -4.02    4.00
 -13  -9  -5    4.70    4.02
   4  10  -5   63.92    3.91
   4  11  -5  211.75    4.45
   4  14  -5    0.50    4.14
   4  15  -5    6.98    3.86
   3  19  -5   20.97    4.11
  -4  -4  -6  227.84    6.15
   3   6  -6   17.54    3.05
   4  11  -6   -1.69    3.46
   4  12  -6   88.64    3.73
   4  13  -6    1.09    3.32
   4  14  -6  123.08    4.59
   3  19  -6   26.97    4.18
  -7  -6  -7   66.03    4.21
   4  11  -7  280.84    4.72
   4  12  -7   -0.70    3.35
   4  13  -7    2.33    3.26
   4  14  -7   -4.28    4.01
 -15  -9  -8   26.11    4.61
   2   4  -8    5.09    2.99
   3  18  -8    2.68    4.11
   3   7  -9  191.57    4.68
   3  18  -9   -0.77    4.13
 -13  -8 -10   -0.78    3.84
   3  17 -10   13.29    4.27
 -14  -8 -11   49.45    4.75
   3  16 -11   42.60    4.60
   3  10 -12   22.10    3.40
   3  14 -12   77.38    4.09
   3  15 -12   -2.51    3.63
 -10  -6 -13   17.77    4.28
   3  12 -13   54.27    4.23
   3  13 -13   77.02    4.21
   2  18 -13   14.41    4.68
 -14  -7 -14   26.31    4.59
   2  17 -14    4.71    3.89
   2   9 -15   10.39    3.29
   2  16 -15   -2.76    4.16
   2  11 -16  180.82    4.74
   2  12 -16   -2.70    3.82
   2  13 -16   15.96    3.74
   2  14 -16   54.02    4.61
 -15  -6 -17    8.54    4.83
   1   8 -17   13.26    3.32
   1  10 -18   33.26    4.02
   1  14 -18    3.66    4.19
   1  15 -18    3.17    4.08
   0  10 -20   -1.54    3.68
   0  14 -20   -4.57    4.02
   0  15 -20   -1.00    4.52
  -1   8 -21    6.66    3.68
  -3   5 -22   85.75    4.45
  -2   7 -22   -0.23    3.67
  -1  11 -22  138.68    4.79
  -1  12 -22    0.10    4.02
  -1  13 -22    1.38    4.62
  -2  10 -23   21.95    4.20
  -3   9 -24    6.38    3.88
 -11  -1 -23   29.92   13.99
  -7   9  27    3.35    9.46
  -3   6  20   17.31    8.74
  -4   5  21  180.96    9.26
  -1  10  18   34.22    7.38
  -9   0 -23   -0.20    7.14
  -9   6  28   35.90    6.89
 -14  -1  27   28.83    6.80
  -8   6  27   24.76    6.22
 -13  -2  25    1.84    5.96
  -8   3  25   29.02    5.62
  -6   7  25   10.07    6.26
 -12  -2  24    2.92    6.41
 -11  -2  23   -3.93    5.41
 -15  -5  22   55.10    6.13
 -13  -4  22    3.73    5.18
  -9  -1  22   22.75    5.70
 -15  -6  20   20.60    6.09
 -13  -5  20    3.93    5.29
  -2  15  20    4.28    6.71
 -14  -6  19  132.37    5.88
 -12  -5  19   19.81    5.55
  -6   0  19    0.02    4.85
  -1  15  18   13.40    5.94
   0  10  16   12.42    5.97
   0  15  16    3.28    6.24
 -19  -9  15   -7.32    6.52
   0  17  15   74.67    7.37
 -18  -9  14   -1.59    5.77
  -2   2  14    7.98    5.30
   1  12  14   61.65    6.21
   1  13  14  132.14    6.50
 -17  -9  13   23.00    5.99
  -3   0  13   -0.59    5.18
   1   9  13  390.13    8.15
   1  16  13   18.85    6.32
 -16  -9  12    5.12    5.14
 -11  -7  12  321.77    5.88
  -6  -4  11    9.95    5.11
  -3  -1  11    3.79    4.26
   2  11  11   43.60    5.16
   2  12  11   33.77    6.14
   2  13  11   43.58    6.02
   2  14  11    3.68    5.67
 -19 -10  10   32.63    5.68
 -10  -7  10   -1.16    4.81
   2   9  10    2.96    5.11
   2  16  10   75.52    6.76
 -18 -10   9   14.94    5.90
  -8  -6   9  162.82    5.73
  -5  -4   8  103.84    4.89
 -17 -10   7   44.63    6.27
 -11  -8   7    4.89    4.79
  -9  -7   7  372.45    6.47
   2  19   7   -0.67    6.33
 -13  -9   6   38.25    5.73
   3   9   6   26.19    5.45
   3  16   6    3.01    5.52
   3   8   5   39.96    5.51
   3  17   5   32.03    6.47
 -16 -10   4    1.92    5.34
   1   2   3   15.42    5.31
   2   4   3   45.50    5.09
 -10  -8   2    4.28    4.88
  -8  -7   2    8.04    5.10
  -8  -7   1    7.71    5.13
   3   6   1  500.61    7.54
   4  11   1   20.39    5.08
   4  14   1   11.19    5.79
   3  19   1   90.63    6.07
 -16 -10   0   16.59    5.32
   4  10   0   -0.30    5.06
   4  15   0    2.09    5.53
 -16 -10  -1    6.27    5.22
 -10  -8  -1   45.58    5.13
  -8  -7  -1  764.51    8.20
 -10  -8  -2  150.76    5.61
  -8  -7  -2   45.99    5.50
 -17 -10  -3   27.64    6.16
  -5  -5  -3  287.92    6.53
 -18 -10  -4   11.77    5.87
 -14  -9  -6   55.62    5.70
 -11  -8  -6  108.20    5.34
   4  10  -6    2.17    4.92
   4  15  -6   21.73    5.59
  -9  -7  -7   26.57    5.03
   3   6  -7   55.86    4.46
   3  19  -7   -1.01    5.62
 -12  -8  -8   17.70    5.78
   1   2  -8  384.82    7.80
   4  12  -8  119.66    5.11
   4  13  -8   -3.00    5.70
 -17  -9  -9   10.95    5.77
  -5  -4 -10   72.78    6.06
 -11  -7 -11   17.84    5.80
  -7  -5 -11   15.56    5.07
   1   3 -11    4.12    4.03
   2   5 -11  582.29    7.67
   3   8 -11   -2.32    4.91
   3  17 -11    3.22    5.87
 -16  -8 -12  119.12    6.40
 -12  -7 -12   22.11    5.70
   3   9 -12   -2.03    4.78
   3  16 -12   11.56    6.16
 -13  -7 -13   96.39    6.00
  -8  -5 -13    9.98    4.75
   1   4 -13    7.72    5.02
   3  11 -13    2.60    4.50
   3  14 -13   81.05    5.58
 -11  -6 -14    2.89    5.55
 -16  -7 -15   52.64    6.91
 -12  -6 -15   65.47    5.89
  -3   0 -16   12.20    5.16
   2  10 -16    8.63    5.57
   2  15 -16    4.34    6.00
   0   5 -17  207.85    5.82
 -13  -5 -18   18.81    5.99
  -1   4 -18    1.86    4.67
   0   6 -18   32.81    4.74
   1   9 -18    2.38    5.52
   1  16 -18   12.54    6.44
  -3   2 -19    1.03    4.60
  -1   5 -19    6.02    4.55
  -1   6 -20   32.34    5.81
   0   9 -20   25.28    5.35
  -1  10 -22    8.72    5.92
  -2   9 -23   21.39    5.92
  -4   6 -24    2.25    6.01
  -5   6 -25   11.43    5.73
  -4   8 -25    1.65    5.47
 -13   1  28    9.81    4.73
 -11   3  28   32.81    5.03
 -13   0  27    0.95    4.01
 -10   3  27   32.09    4.54
 -13  -1  26    8.57    4.20
  -9   3  26   21.60    4.52
 -15  -3  25   34.39    4.32
 -12  -1  25    7.08    4.42
 -11  -1  24   -0.49    3.79
  -8   2  24   12.23    3.82
 -10  -1  23    8.80    3.88
  -9   0  23   -3.28    3.96
  -8   1  23   14.04    4.07
 -14  -5  21    3.67    4.38
 -18  -7  20   30.59    4.81
 -10  -3  20   12.43    4.11
 -17  -7  19   20.40    4.19
  -8  -2  19  322.33    5.31
  -7  -1  19    2.35    3.38
 -19  -8  18   34.70    4.62
 -16  -7  18   87.07    4.65
 -10  -4  18   93.67    3.78
  -4   2  18   10.30    3.59
 -18  -8  17    8.78    4.03
 -15  -7  17   69.86    3.93
  -8  -3  17   35.65    3.58
 -17  -8  16   42.77    4.51
 -14  -7  16   19.67    3.89
 -10  -5  16    5.58    3.37
 -16  -8  15   21.13    4.34
 -13  -7  15   85.34    4.25
 -11  -6  15   33.22    3.50
  -8  -4  15   19.94    3.54
 -19  -9  14   67.00    4.91
 -15  -8  14    4.05    3.68
 -14  -8  13   15.89    3.89
 -10  -6  13  211.28    4.46
  -7  -4  13  140.89    4.48
   1  18  12    2.43    4.86
 -16  -9  11    3.23    3.70
 -13  -8  11    6.90    3.91
  -9  -6  11  175.71    4.39
  -5  -3  11   -1.60    3.73
  -4  -2  11   88.66    3.95
 -20 -10  10   35.73    4.49
 -15  -9  10    9.15    3.92
  -7  -5  10   79.03    4.12
 -19 -10   9    0.54    3.98
 -12  -8   9    4.17    3.31
   2  18   9   -4.01    4.28
 -18 -10   8   30.84    4.30
 -14  -9   8   47.84    4.07
  -4  -3   8 1547.62   11.24
  -3  -2   8  260.35    5.85
  -6  -5   7   74.13    4.19
   3  10   7   22.14    3.72
   3  15   7    3.85    4.07
 -17 -10   6    6.33    4.27
 -11  -8   6  151.38    4.16
  -9  -7   6   20.30    3.74
 -17 -10   5  160.87    4.93
 -13  -9   5   10.05    4.04
  -7  -6   5    0.12    3.65
 -13  -9   4   10.00    4.12
   3   7   4  317.93    6.19
   3  18   4   37.50    4.45
 -16 -10   3  134.87    4.35
  -4  -4   3  445.14    6.83
 -16 -10   2   27.41    4.02
   4  11   2  105.51    4.13
   4  12   2   31.07    3.64
   4  13   2   54.47    3.68
   4  14   2   20.31    4.26
   3  19   2    8.41    4.08
 -16 -10   1   42.36    3.98
 -10  -8   1   13.81    3.55
  -5  -5   1   10.92    3.14
   4  10   1  259.34    5.05
   4  15   1   13.13    3.90
 -10  -8   0   99.03    4.07
  -8  -7   0  123.86    4.36
  -5  -5   0   42.68    3.47
   4  16   0   34.76    3.96
 -17 -10  -1   18.78    4.37
  -5  -5  -1  522.60    7.07
   4   9  -1    4.26    3.58
   4  16  -1   -3.76    3.83
   3  20  -1    0.35    4.63
 -17 -10  -2   11.81    4.30
 -13  -9  -2   15.15    4.14
  -5  -5  -2  235.31    5.29
   4   9  -2   44.47    3.89
   4  16  -2   35.15    4.07
   3  20  -2   -1.55    4.58
 -18 -10  -3    4.86    4.14
 -13  -9  -3   76.86    4.43
   4   9  -3   35.17    3.73
   4  16  -3   37.19    3.94
   3  20  -3   -2.07    4.46
 -19 -10  -4    5.08    4.64
   4   9  -4   12.05    3.67
   4  16  -4   16.56    3.91
   3  20  -4    0.02    4.49
 -14  -9  -5   12.42    3.98
   4   9  -5  282.15    5.00
   4  16  -5   17.93    3.89
   3  20  -5   14.68    4.56
  -7  -6  -6  180.65    5.07
   4   9  -6   44.39    3.81
   4  16  -6   -0.44    3.72
 -15  -9  -7   22.67    3.85
   4  10  -7  106.76    4.01
   4  15  -7   52.69    4.12
   4  16  -7   11.31    3.75
 -16  -9  -8   25.81    4.51
   3   6  -8  161.65    4.68
   4  10  -8    4.13    3.43
   4  11  -8   18.38    3.48
   4  14  -8   23.37    4.02
   4  15  -8  140.25    4.44
   3  19  -8    8.19    4.67
 -18  -9  -9    4.39    4.73
 -10  -7  -9   14.81    3.38
   2   4  -9  323.00    5.68
   4  11  -9   26.18    3.53
   4  12  -9    0.32    3.30
   4  13  -9    4.52    3.96
   4  14  -9   34.28    4.05
   3  19  -9   34.77    4.83
   3   7 -10   67.62    4.00
   3  18 -10    3.06    3.99
   3  17 -12    5.27    4.15
   2   6 -13   75.49    3.93
   3  10 -13   33.05    3.48
   3  15 -13   -3.01    3.69
   3  16 -13   25.34    4.29
   2   7 -14    9.55    3.41
   3  12 -14   16.15    3.98
   3  13 -14   24.61    3.90
   3  14 -14   27.81    3.86
   2  18 -14   24.01    4.56
   2   8 -15    6.19    3.32
   2  17 -15   38.74    4.30
   0   4 -16   60.47    3.90
   1   6 -16   94.66    4.01
   2   9 -16   31.72    3.40
   2  16 -16    2.40    3.97
  -1   3 -17  102.51    4.36
   1   7 -17    9.50    3.34
   2  12 -17   19.98    3.74
   2  13 -17    7.01    3.71
   2  14 -17  132.32    4.89
   0   7 -19   64.72    4.28
   1  11 -19   17.35    3.82
   1  12 -19   11.81    4.15
   1  13 -19   -0.87    4.23
   1  14 -19    9.66    3.99
   1  15 -19    1.84    3.90
  -2   4 -20   14.18    4.03
   0  11 -21  193.96    5.08
   0  12 -21   34.82    4.28
   0  13 -21    0.17    3.90
   0  14 -21    8.10    4.44
  -1   9 -22   28.62    4.39
  -3   6 -23    3.00    3.65
  -3   8 -24   12.46    4.14
  -6   6 -26    5.53    4.37
  -2  -2  -7  494.66   18.08
  -7  -1 -20   28.54    8.32
  -3  12  22   72.85    8.32
  -3  13  22   -1.54    7.13
  -2  10  20   12.22    6.93
 -12   2  28    8.34    6.74
 -12   1  27   41.41    5.96
 -11   2  27   48.11    6.27
 -12   0  26    5.71    5.89
 -10   2  26    5.72    6.23
 -11   0  25    0.68    6.19
  -9   2  25   15.59    5.54
  -7   5  25   28.55    6.65
 -16  -4  24   14.06    6.19
 -14  -3  24    4.71    6.00
 -10   0  24    4.69    5.36
  -9   1  24   23.48    5.44
 -17  -5  23   10.62    6.38
 -13  -3  23   -4.91    6.26
  -6   4  23   -0.95    5.64
  -5   6  23  207.48    8.29
 -12  -3  22   21.57    5.36
  -3  14  22    8.81    6.69
 -17  -6  21    9.29    5.51
 -11  -3  21   63.21    5.84
  -6   1  20  288.82    6.73
  -4   4  20    2.25    4.70
  -4   3  19   10.07    4.91
  -1  16  18   13.15    6.86
 -11  -5  17    4.66    5.74
  -5   0  17   -2.88    5.05
 -12  -6  16   47.96    5.79
  -3   2  16   13.51    5.23
   0  16  16    1.41    5.94
  -4   0  15    1.19    5.12
  -9  -5  14   12.26    4.86
   1  11  14    2.86    5.86
   1  14  14  109.92    6.25
   1  15  14   87.23    6.82
 -18  -9  13    3.26    5.85
 -12  -7  13   55.96    5.98
   1  17  13   -3.90    5.97
 -17  -9  12   63.48    6.22
  -8  -5  12  503.48    6.88
 -11  -7  11   61.87    5.01
   1   6  11  245.56    8.33
   2  10  11   57.59    5.35
   2  15  11   93.72    5.94
   2  17  10    8.69    6.15
 -20 -10   9    1.94    6.33
 -15  -9   9    3.67    5.37
 -10  -7   9  134.03    5.34
 -19 -10   8   20.41    5.54
  -8  -6   8   15.74    5.10
   3  12   8    4.78    4.86
   3  13   8   37.79    6.10
   3  14   8   61.75    6.10
   2  19   8    9.26    7.00
 -18 -10   7    6.14    5.86
 -14  -9   7   60.89    5.69
   3  16   7    8.42    5.38
 -18 -10   6   16.85    5.76
   3  17   6   47.47    6.59
   3  18   5   74.86    6.34
 -17 -10   4   -5.85    6.26
 -17 -10   3  281.91    7.14
 -13  -9   3   10.20    5.83
   4  12   3    3.62    4.78
   4  13   3   15.04    4.77
   4  14   3   -2.28    5.78
   3  19   3   29.27    5.89
 -17 -10   2   50.14    6.36
 -13  -9   2    9.43    5.70
   3   6   2    6.32    4.24
   4  15   2   51.77    5.77
 -17 -10   1  171.41    6.89
 -13  -9   1   -9.20    5.75
   4  16   1   41.02    5.51
 -17 -10   0   58.62    6.42
 -13  -9   0   15.57    5.71
   4   9   0  157.37    5.80
   3  20   0   30.69    6.48
 -13  -9  -1   16.25    5.81
   4  17  -1  130.10    5.72
 -18 -10  -2   14.11    5.75
   2   3  -2    1.92    4.60
   4  17  -2    4.12    5.23
 -19 -10  -3   20.63    6.66
   2   3  -3  161.79    6.30
   4  17  -3   10.13    5.21
   2   3  -4  144.51    5.98
   4  17  -4  124.17    5.65
 -11  -8  -5    4.19    4.82
  -4  -4  -5    7.35    4.23
   4  17  -5   24.27    5.81
 -15  -9  -6    4.17    5.30
  -9  -7  -6    2.02    4.91
   4  17  -6  171.46    6.59
   4   9  -7  892.30    7.95
 -17  -9  -8   12.47    6.00
  -6  -5  -8  257.69    7.09
   4  16  -8   13.07    5.20
 -13  -8  -9    4.20    5.57
  -8  -6  -9    3.44    4.95
   4  15  -9  121.23    5.76
 -14  -8 -10   64.58    5.63
   0   1 -10    0.99    4.08
   4  12 -10   31.87    4.62
   4  13 -10    4.67    5.62
 -15  -8 -11   -3.02    6.20
  -9  -6 -11  140.17    5.81
  -1   0 -11    2.06    4.02
   3  18 -11  -10.61    5.68
 -17  -8 -12   30.69    6.83
   3   8 -12    4.91    4.86
   3   9 -13  195.82    5.44
 -15  -7 -14    4.49    5.97
  -7  -4 -14   -0.13    4.71
  -2   0 -14  586.95   11.11
   3  11 -14   -1.36    5.65
   3  15 -14   53.05    6.18
   1   5 -15   29.17    5.04
 -14  -6 -16    1.03    5.89
  -2   1 -16   73.53    5.68
   2  17 -16    2.31    6.40
 -12  -5 -17   62.45    6.83
   2  11 -17    8.68    5.38
   2  15 -17    7.32    5.75
   1   8 -18   23.71    5.66
  -2   3 -19   54.34    5.04
   1  10 -19   91.60    5.64
   0   8 -20   10.30    5.50
  -2   5 -21    9.23    5.50
  -1   7 -21    2.05    5.33
  -5   3 -23   40.29    5.58
  -2   8 -23    7.23    6.11
  -2  11 -24    4.29    6.40
  -3  10 -25   35.24    6.39
 -15  -2  26   39.25    4.84
 -11   1  26   62.71    4.71
 -10   1  25    4.22    4.50
 -15  -4  23   43.42    4.40
 -16  -5  22   91.11    4.53
 -14  -4  22    7.84    4.32
 -15  -5  21   15.71    4.33
 -13  -4  21   93.93    4.24
 -16  -6  20   -8.96    4.17
 -14  -5  20   35.70    3.88
 -12  -4  20   52.50    4.15
  -9  -2  20    1.79    4.04
  -8  -1  20  187.05    4.58
 -18  -7  19   21.05    3.93
 -15  -6  19   12.91    4.45
 -13  -5  19   90.73    4.16
 -11  -4  19   -5.30    3.93
 -17  -7  18   -1.66    4.11
 -14  -6  18    7.26    3.69
 -12  -5  18   -4.68    3.93
 -19  -8  17   21.51    4.54
 -13  -6  17   28.59    4.05
  -7  -2  17   37.51    3.74
  -6  -1  17   21.96    3.66
 -18  -8  16   82.48    4.44
  -9  -4  16   46.46    3.71
 -17  -8  15    8.20    4.28
 -14  -7  15   20.39    3.78
  -7  -3  15    3.29    3.53
 -16  -8  14   29.43    3.73
 -13  -7  14   93.25    4.38
 -11  -6  14   60.23    3.67
 -19  -9  13   32.01    4.13
 -15  -8  13   14.29    3.78
  -6  -3  13   16.59    3.71
  -4  -1  13  260.83    5.85
 -18  -9  12    9.08    4.13
 -14  -8  12   -1.75    3.86
 -17  -9  11   91.88    4.68
   2  16  11   19.29    4.47
 -16  -9  10    0.64    3.72
 -13  -8  10    8.74    3.98
  -6  -4  10   68.58    4.16
  -2   0  10   93.75    4.71
  -7  -5   9  171.79    4.67
 -20 -10   8    1.26    4.49
 -15  -9   8    7.27    3.82
 -12  -8   8   81.01    3.79
 -10  -7   8   22.65    3.49
   3  11   8    1.07    3.43
   3  15   8  177.80    4.89
 -20 -10   7    3.67    4.54
 -19 -10   7    9.23    4.01
  -5  -4   7   15.84    3.16
   3   9   7 1128.55    9.46
 -19 -10   6    3.07    3.95
 -14  -9   6    0.49    3.87
  -6  -5   6    2.71    2.90
   2   5   6   33.05    3.65
   3   8   6   27.36    3.92
 -18 -10   5   10.46    4.07
 -14  -9   5   36.48    4.07
 -11  -8   5   41.51    3.66
  -9  -7   5  251.95    4.95
 -18 -10   4   12.61    4.39
 -11  -8   4  136.58    4.13
  -7  -6   4  297.29    5.43
   4  13   4  159.53    4.32
   3  19   4    0.29    4.12
 -18 -10   3   26.75    4.53
  -3  -3   3   11.37    3.37
  -2  -2   3 1540.99   15.56
   4  11   3    4.10    3.48
   4  15   3    3.36    4.02
 -18 -10   2   11.85    4.34
  -4  -4   2   10.32    3.20
  -1  -1   2   37.23    4.77
   4  10   2  134.83    4.43
   4  16   2   27.19    4.01
   3  20   2   12.46    4.77
 -18 -10   1   12.33    4.20
   4   9   1   -0.49    3.61
   4  17   1  126.74    4.38
   3  20   1   -5.98    4.71
 -18 -10   0   -1.44    4.21
   4  17   0   -0.19    3.70
 -18 -10  -1    2.12    4.22
   2   3  -1   24.38    3.76
 -19 -10  -2    2.45    4.77
   3   5  -2  353.29    6.14
   4   8  -2   80.26    4.12
   4  18  -2    4.34    4.38
 -14  -9  -3    4.39    3.81
   3   5  -3  122.60    4.34
   4   8  -3  121.56    4.39
   4  18  -3    2.09    4.25
 -14  -9  -4   13.94    3.93
 -11  -8  -4   43.29    3.62
   3   5  -4   89.73    3.93
   4   8  -4  347.01    5.52
   4  18  -4    1.47    4.18
  -7  -6  -5    5.84    3.63
   0   0  -5    0.48    3.29
   2   3  -5    1.65    3.18
   3   5  -5   55.44    3.53
   4   8  -5  141.63    4.50
   4  18  -5   27.63    4.37
 -16  -9  -7   46.99    4.67
 -12  -8  -7    2.17    4.02
   4  17  -7   28.72    4.39
 -18  -9  -8   17.17    4.90
   4   9  -8   -3.23    3.71
   4  17  -8   16.35    4.39
   3   6  -9   92.44    4.17
   4  10  -9    5.80    3.37
   4  16  -9   10.43    3.71
 -11  -7 -10   29.69    4.33
   4  11 -10   68.45    3.62
   4  14 -10  122.64    4.42
   4  15 -10   35.89    3.95
   3  19 -10    3.48    4.50
   3   7 -11   28.29    3.65
   4  12 -11    7.21    3.24
   4  13 -11    7.59    3.90
   4  14 -11   73.98    4.27
   3  19 -11   80.65    4.87
   2   5 -12  209.05    4.94
   3  18 -12    3.03    3.84
   0   2 -13 1121.03   10.68
   3  17 -13   -1.18    4.08
   3  10 -14   17.28    3.37
   3  16 -14    1.74    4.19
   0   3 -15    4.81    3.54
   2   7 -15    7.93    3.40
   3  12 -15  113.61    4.30
   3  13 -15   44.22    4.04
   3  14 -15   49.33    3.88
   2   8 -16  323.09    4.93
   2  10 -17    7.62    3.88
   2  16 -17   31.93    4.08
   1   9 -19  114.98    4.47
   1  12 -20   14.31    4.43
   1  13 -20    1.36    4.20
   1  14 -20    7.28    3.89
   0  10 -21  101.26    4.15
  -2   6 -22   85.22    4.36
  -1   8 -22    9.70    3.58
  -6   2 -23   31.45    4.73
  -1  11 -23   25.93    4.21
  -1  12 -23    4.04    4.68
  -6   3 -24   79.73    5.07
  -3   7 -24    2.28    4.26
  -2  10 -24    5.81    3.95
  -4   7 -25   82.82    4.57
  -5   7 -26   43.01    4.89
  -6  -3 -15  106.08    9.74
   1   7  12    4.16    6.23
  -3  -1 -14   12.43    6.37
  -4  -1 -16   91.78    7.90
 -12  -4 -19   30.59    7.60
  -8   5  26   10.40    6.20
 -16  -3  25    7.65    6.65
 -14  -2  25   45.87    6.05
 -13  -2  24   22.79    6.15
  -6   3  22   10.64    5.81
 -18  -6  21   12.23    6.67
 -10  -2  21  131.04    6.20
  -6   2  21   67.93    6.45
  -7   0  20  331.77    6.67
  -9  -3  18   77.19    5.07
 -16  -7  17   -1.44    6.14
 -15  -7  16    5.62    5.21
 -10  -5  15   68.59    4.97
  -6  -2  15  110.30    5.73
  -5  -1  15    0.66    5.14
   1  10  14    6.04    4.79
   1  16  14    6.02    6.09
 -20  -9  13    0.12    6.42
  -5  -2  13  142.04    5.90
   1  18  13  -14.55    6.82
 -12  -7  12   22.27    4.62
 -10  -6  12    2.10    4.83
  -2   1  12   75.24    5.41
   2  13  12    6.02    5.68
  -9  -6  10   21.81    5.05
   2   8  10  201.08    6.87
   2  18  10   17.78    5.91
 -16  -9   9   20.09    5.28
   2   7   9   50.10    5.68
   2  19   9   49.89    6.85
   3  16   8   27.13    5.43
 -15  -9   7    1.07    5.38
 -12  -8   7   18.99    4.83
   3  17   7    5.86    6.27
 -20 -10   6   -8.57    6.59
   3  18   6   54.35    6.32
 -19 -10   5   86.90    6.04
   3  19   5    7.31    5.76
 -19 -10   4   -7.58    5.66
 -14  -9   4   30.63    5.71
  -9  -7   4   50.34    5.29
   4  12   4   -1.46    4.86
   4  14   4   21.22    5.84
 -11  -8   3   55.36    5.02
  -7  -6   3  560.12    7.60
   4  10   3   82.68    5.50
   4  16   3  125.36    6.00
  -4  -4   1    0.48    4.43
 -19 -10   0   -2.99    5.91
 -19 -10  -1   -4.43    5.59
   3   5  -1  119.74    5.34
   4   8  -1   16.44    5.15
   4  18  -1   -4.78    6.12
 -14  -9  -2   40.75    5.71
 -11  -8  -3   20.45    4.84
  -4  -4  -4   27.65    4.56
 -15  -9  -5   -0.65    5.36
  -9  -7  -5  134.66    5.61
 -16  -9  -6   26.92    6.40
  -3  -3  -6  314.54    8.98
   3   5  -6   41.16    4.38
   4   8  -6   70.51    5.39
   4  18  -6   13.85    5.80
 -17  -9  -7   44.40    6.09
   4  18  -7   85.03    6.10
 -13  -8  -8   13.49    5.57
 -10  -7  -8  242.04    6.15
   1   2  -9   40.10    4.63
   4   9  -9  889.73    7.83
   4  17  -9  -13.61    6.07
   2   4 -10    2.98    4.06
   4  10 -10    8.53    4.74
   4  16 -10    5.47    5.04
 -16  -8 -11   22.20    5.96
 -12  -7 -11   12.16    5.59
   4  11 -11    6.71    4.59
   4  15 -11   90.55    5.52
  -6  -4 -12   95.02    6.24
   1   3 -12  333.66    7.11
 -14  -7 -13  118.00    6.86
   3   8 -13   29.82    4.86
   3  18 -13   23.00    6.46
 -16  -7 -14    7.60    6.28
  -9  -5 -14   15.60    5.82
   1   4 -14   10.18    5.04
   2   6 -14   67.52    5.20
   3  17 -14   11.85    5.68
   3  11 -15    7.08    5.52
   3  15 -15    5.62    6.12
 -11  -5 -16   84.61    6.19
   2   9 -17   10.21    5.64
 -14  -5 -18    5.55    5.73
  -3   1 -18   48.00    5.24
   0   5 -18   33.07    4.82
   2  12 -18    6.03    5.13
   2  13 -18   69.80    6.22
   2  14 -18    4.23    5.96
   0   6 -19   46.13    5.90
   1  11 -20  140.22    5.69
   1  15 -20   -6.96    6.44
   0   9 -21   27.52    5.40
  -5   2 -22   29.37    5.69
  -4   3 -22    3.85    5.38
   0  12 -22   34.91    5.85
   0  13 -22    5.91    6.48
  -4   4 -23   28.38    5.32
  -2   7 -23   -2.58    5.66
  -1  10 -23   18.50    5.91
  -7   2 -24   87.35    6.87
  -5   4 -24   -0.78    6.05
  -2   9 -24   -0.30    5.74
  -7   3 -25    7.61    5.75
  -6   4 -25   10.94    5.79
  -3   9 -25   14.37    6.58
 -14  -1  26   17.45    4.10
 -17  -4  24   37.11    4.78
 -15  -3  24   25.78    4.17
 -12  -2  23    5.49    3.77
 -17  -5  22   -0.69    3.94
 -11  -2  22   -0.96    3.92
  -9  -1  21   -4.39    4.14
 -17  -6  20    2.74    3.93
 -19  -7  19   31.94    4.54
 -16  -6  19  123.43    4.76
 -10  -3  19   62.81    4.40
 -18  -7  18   33.18    4.16
 -10  -4  17   12.17    3.37
 -19  -8  16   33.68    5.01
 -13  -6  16   -7.15    3.97
 -11  -5  16   27.16    3.46
   0  17  16    5.07    4.94
 -18  -8  15   -1.93    4.11
 -12  -6  15    0.08    4.03
 -17  -8  14   33.39    4.48
  -8  -4  14    1.67    3.52
 -16  -8  13    8.57    3.54
 -13  -7  13   -2.46    4.09
  -9  -5  13   45.37    3.75
 -19  -9  12   48.16    4.28
 -15  -8  12   -2.08    3.74
  -7  -4  12  433.68    5.91
   2  12  12    2.35    4.28
   2  14  12    9.36    4.00
 -18  -9  11   50.67    4.42
 -14  -8  11    5.77    3.83
  -8  -5  11   85.80    4.16
   2  17  11    8.53    4.50
 -17  -9  10   25.14    4.42
 -11  -7  10  156.70    4.17
  -5  -3  10    2.67    2.99
 -13  -8   9    1.27    4.01
   3  12   9   60.58    3.90
   3  13   9   34.41    4.33
   3  14   9  169.14    5.04
 -16  -9   8    2.14    3.70
   3  10   8    4.49    3.53
 -10  -7   7  419.15    5.36
  -8  -6   7   -1.13    3.52
  -4  -3   7   65.40    3.88
  -2  -1   7   49.94    4.10
   3  18   7   24.20    4.46
 -15  -9   6   33.54    4.01
 -12  -8   6   -0.25    3.29
 -20 -10   5   -5.83    4.69
  -6  -5   5  201.29    4.56
   3   7   5   71.93    4.42
   4  13   5   16.47    3.47
   4  14   5  175.91    5.00
 -20 -10   4   -0.87    4.59
   2   4   4    1.51    3.11
   4  11   4   67.81    3.94
   4  15   4   12.27    4.03
   4  16   4   34.76    4.07
 -20 -10   3   -1.69    4.67
 -19 -10   3  109.36    4.65
 -14  -9   3   -0.25    3.99
  -9  -7   3    2.17    3.61
   3   6   3  150.05    4.69
   4  17   3   -4.78    4.47
 -20 -10   2    2.91    4.47
 -19 -10   2   29.20    4.41
 -14  -9   2   45.84    4.13
 -11  -8   2   -0.76    3.45
  -7  -6   2  160.59    4.89
  -3  -3   2  304.09    6.65
   4   9   2    6.53    3.74
   4  17   2    5.17    3.84
 -20 -10   1    7.46    4.55
 -19 -10   1   22.89    4.25
 -14  -9   1   -5.15    3.99
 -11  -8   1   49.53    3.65
  -7  -6   1  988.71    8.37
   4  18   1    2.38    4.31
 -20 -10   0    4.08    4.50
 -14  -9   0   80.63    4.33
 -11  -8   0   15.26    3.51
  -4  -4   0   51.20    3.85
   2   3   0   46.43    4.30
   3   5   0  353.47    6.43
   4   8   0   31.93    3.89
   4  18   0   -0.34    4.27
 -14  -9  -1   10.09    3.95
 -11  -8  -1    7.18    3.42
 -11  -8  -2   35.66    3.60
   4  19  -2    2.27    4.02
  -7  -6  -3  184.97    4.97
   4  19  -3   -8.50    4.00
 -15  -9  -4   -0.51    3.87
  -9  -7  -4   22.94    3.69
  -7  -6  -4  125.55    4.64
   4  19  -4   12.13    4.05
   4  19  -5   10.36    4.02
 -12  -8  -6   14.21    4.11
   2   3  -6  352.60    6.55
   4  19  -6   29.32    4.10
 -18  -9  -7    5.59    4.14
   3   5  -7    3.00    2.93
   4   8  -7    7.47    3.59
  -8  -6  -8   11.73    3.63
   4   8  -8   23.06    3.64
   4  18  -8    9.65    4.10
 -14  -8  -9   28.17    3.98
   4  18  -9   31.06    4.19
 -15  -8 -10   -3.00    4.47
   3   6 -10   43.67    3.82
   4   9 -10   10.32    3.58
   4  17 -10    8.66    4.25
 -17  -8 -11   17.18    4.05
   4  10 -11  132.66    4.04
   4  16 -11    6.16    4.34
 -13  -7 -12   23.23    3.99
 -10  -6 -12    7.60    4.19
   3   7 -12  110.81    4.14
   4  12 -12   -3.79    4.05
   4  13 -12   24.33    3.95
   4  14 -12   98.27    4.25
   4  15 -12   22.97    3.64
   3   9 -14   13.86    3.37
   3  18 -14   17.24    4.53
 -13  -6 -15   23.41    4.64
   3  10 -15    6.33    3.18
   3  16 -15   -6.00    4.21
  -1   2 -16    1.84    3.42
   3  12 -16    6.75    3.79
   3  13 -16  140.17    4.44
   3  14 -16    8.40    4.44
   1   6 -17   65.36    3.83
  -2   2 -18   95.02    4.32
   1   7 -18   -2.51    3.22
   2  11 -18    5.84    3.86
   2  15 -18    9.87    3.94
   2  16 -18   -1.07    4.51
  -1   5 -20   38.85    4.25
   0   7 -20   66.26    4.34
   1  10 -20   43.76    3.90
  -1   6 -21   45.99    4.14
  -3   4 -22    1.97    3.77
   0  11 -22   14.59    4.24
  -4   5 -24    8.89    4.37
  -5   5 -25   20.93    4.16
  -8  -1 -21   23.96    9.66
  -5   8  24    4.19    8.90
  -3  11  22   66.15    9.73
  -5  -3 -13   10.44    7.11
  -6  -1 -19    0.97    7.97
  -7   7  26   39.16    7.79
  -3   5  19  208.52    9.14
  -1   9  18    1.27    7.01
  -2   3  15   21.57    6.72
  -4   0 -18   46.25    6.43
  -6   1 -22   14.12    6.58
 -10   5  28    9.50    6.78
 -14   0  27   -5.24    6.74
  -9   5  27   29.56    6.18
  -8   7  27   43.94    6.25
 -13  -1  25   23.00    6.18
  -7   4  24    3.22    5.58
 -16  -4  23    7.40    5.79
 -14  -3  23   -6.23    6.12
  -7   3  23   -0.66    5.60
 -10  -1  22   62.21    5.87
 -16  -5  21   29.46    5.90
  -8   0  21   -2.49    5.84
  -7   1  21   -4.86    5.91
 -11  -3  20   82.09    5.89
  -1  13  19    1.78    6.35
  -1  14  19    5.66    6.12
 -15  -6  18    5.92    5.10
  -8  -2  18    0.39    4.81
  -5   1  18    8.29    4.97
 -17  -7  17  117.07    6.31
 -14  -6  17   70.72    5.60
  -3   3  17   26.21    5.35
   0  12  17    3.73    5.53
   0  13  17   14.60    5.55
   0  14  17   94.57    6.86
 -16  -7  16   26.71    5.73
  -8  -3  16   89.44    5.27
   0   9  16   49.97    5.50
 -14  -7  14   10.18    5.52
   1  17  14   23.06    6.11
 -11  -6  13   20.20    4.82
   1   8  13  100.14    6.26
 -20  -9  12   -5.94    6.51
   2  11  12   53.38    5.22
   2  15  12    8.09    5.47
 -19  -9  11   34.19    5.80
 -12  -7  11  123.73    5.17
   2   9  11   44.58    5.34
 -18  -9  10    5.20    6.06
 -14  -8  10   13.15    5.56
   1   5  10  472.22   11.55
 -17  -9   9   60.18    5.85
 -11  -7   9  235.34    5.74
  -9  -6   9   27.74    5.03
  -1   1   9   28.53    5.13
   3  15   9   -4.86    5.64
 -13  -8   8   30.36    5.29
  -7  -5   8    0.64    5.09
   2   6   8   46.14    5.82
   3  17   8   11.66    6.34
 -16  -9   7   41.84    5.38
  -3  -2   7  125.99    5.65
  -8  -6   6  233.79    6.11
  -5  -4   6   95.20    4.90
   3  19   6    5.30    6.44
 -15  -9   5    6.54    5.50
   4  12   5    9.90    4.77
   4  15   5    3.81    5.60
   4  10   4   41.22    5.24
  -9  -7   2   38.36    5.23
   4  18   2    0.46    6.17
   4   8   1   -0.78    5.23
  -7  -6   0  197.86    6.33
   4  19   0   -6.21    5.75
  -7  -6  -1  693.34    8.28
  -4  -4  -1    5.25    4.43
   4  19  -1    5.26    5.71
  -7  -6  -2   43.63    5.51
  -4  -4  -2  421.00    7.85
 -15  -9  -3    8.19    5.43
  -9  -7  -3  242.82    6.24
  -4  -4  -3   11.05    4.45
 -16  -9  -5  128.29    6.67
 -12  -8  -5   23.92    5.25
 -17  -9  -6    6.57    6.05
 -13  -8  -7   15.86    5.69
 -10  -7  -7  148.26    5.72
  -6  -5  -7   23.41    5.30
   2   3  -7  392.54    7.40
   4  19  -7   -8.96    6.14
 -11  -7  -9   34.05    6.13
  -5  -4  -9    1.97    5.10
 -16  -8 -10   81.55    6.50
  -9  -6 -10   56.56    5.28
  -7  -5 -10    4.66    5.06
   4  17 -11   16.81    5.98
   4  11 -12  185.99    5.38
   4  16 -12   11.38    6.07
 -15  -7 -13   29.98    6.18
 -11  -6 -13   31.40    5.79
   2   5 -13  223.45    6.10
   4  13 -13    2.19    5.46
 -12  -6 -14   38.87    5.70
  -1   1 -14   19.26    5.23
 -10  -5 -15   -1.36    5.52
   3  17 -15    9.72    6.22
 -15  -6 -16    1.13    5.64
   1   5 -16  119.77    5.45
   3  11 -16   82.53    5.78
   3  15 -16   66.21    6.09
   0   4 -17    1.92    4.72
   2  10 -18   27.78    5.55
  -1   4 -19   95.02    5.25
   1   8 -19    3.81    5.62
   2  13 -19   -6.59    6.02
  -5   1 -21   56.11    6.16
  -4   2 -21    3.36    5.47
  -3   3 -21    1.73    5.54
   0   8 -21    3.75    5.30
   1  13 -21    1.43    5.70
  -1   7 -22  103.78    5.78
   0  10 -22    8.78    6.06
  -3   5 -23   73.65    5.70
  -1   9 -23   12.01    6.11
  -3   8 -25   21.12    5.75
  -7   4 -26    5.09    6.47
  -6   5 -26    3.34    6.59
  -4   8 -26    2.78    6.31
 -13   2  28   42.85    5.10
 -11   4  28    3.93    4.64
 -13   0  26    9.83    4.36
 -15  -2  25   37.41    4.18
 -12  -1  24    9.24    4.53
 -11  -1  23   46.06    4.16
 -18  -5  22  101.16    5.05
 -15  -4  22    5.08    4.18
 -13  -3  22    2.33    3.69
  -7   2  22   -2.06    4.04
 -14  -4  21   46.68    3.95
 -12  -3  21    3.24    3.83
 -18  -6  20    4.86    3.87
 -15  -5  20    1.31    4.43
 -13  -4  20   22.73    3.92
 -17  -6  19   40.83    4.33
 -14  -5  19   11.86    3.76
 -12  -4  19   17.09    4.01
 -19  -7  18   14.20    4.69
 -13  -5  18   12.57    3.92
 -11  -4  18   65.66    4.38
  -7  -1  18   30.99    3.67
  -6   0  18  683.33    7.69
 -12  -5  17    4.79    4.03
   0  15  17    5.03    4.41
 -20  -8  15    4.09    4.52
 -19  -8  15   13.31    4.03
 -15  -7  15   39.84    3.88
  -9  -4  15   53.93    3.80
   1  13  15   99.96    4.83
   1  14  15    0.45    3.84
 -18  -8  14    9.98    4.03
 -12  -6  14   43.44    3.52
 -10  -5  14  179.22    4.38
  -7  -3  14   37.27    3.85
 -17  -8  13    4.52    4.29
 -16  -8  12   25.91    3.86
 -13  -7  12  128.51    4.55
  -6  -3  12   39.96    3.92
   2  16  12   46.46    4.75
 -20  -9  11   48.88    5.01
 -15  -8  11    0.65    3.81
 -10  -6  11  317.06    4.98
   2  18  11    1.79    4.15
 -19  -9  10   35.82    4.22
  -4  -2  10   58.14    3.69
  -3  -1  10    9.79    3.13
 -18  -9   9  100.18    4.81
  -6  -4   9  144.12    4.65
   3  11   9   48.34    3.80
   3  16   9    4.31    3.76
 -17  -9   8    0.56    3.66
 -13  -8   7   21.56    3.40
   3  19   7   27.16    4.89
 -16  -9   6   14.72    3.78
 -10  -7   6   18.48    3.61
 -12  -8   5   37.18    3.62
   4  11   5   -0.29    3.54
   4  16   5   45.04    4.17
 -15  -9   4   33.76    4.03
 -12  -8   4   50.09    3.66
  -6  -5   4    2.85    2.96
   4  17   4   48.56    4.71
 -15  -9   3    7.68    3.90
   4   9   3  213.58    5.08
   4  18   3    1.97    4.31
 -15  -9   2   34.30    4.04
  -2  -2   2  494.42    9.65
 -15  -9   1    2.60    3.95
  -9  -7   1    5.56    3.58
  -3  -3   1    4.39    3.32
   3   5   1  233.07    5.56
   4  19   1   14.01    4.06
 -15  -9   0    1.92    4.00
  -9  -7   0    0.86    3.57
 -15  -9  -1    8.07    3.95
  -9  -7  -1  124.30    4.42
   5  13  -1   25.75    3.46
   5  14  -1    0.64    4.09
 -15  -9  -2    4.86    3.87
  -9  -7  -2    8.69    3.79
   4   7  -2    0.19    2.90
   5  12  -2   38.03    3.60
   5  13  -2   -0.45    3.26
   5  14  -2   92.73    4.47
   5  15  -2    3.30    3.99
   4  20  -2   27.38    4.65
   4   7  -3  163.37    4.26
   5  12  -3   41.85    3.61
   5  13  -3   35.30    3.52
   5  14  -3   38.13    4.23
   5  15  -3   94.10    4.32
   4  20  -3   80.11    4.82
 -16  -9  -4   10.70    3.79
 -12  -8  -4   38.25    3.49
   4   7  -4  254.22    4.76
   5  11  -4   19.80    3.57
   5  12  -4    8.92    3.42
   5  13  -4   17.84    3.35
   5  14  -4   74.13    4.21
   5  15  -4   23.34    3.92
   5  16  -4   57.93    4.04
 -17  -9  -5   56.67    4.70
   4   7  -5   12.43    3.84
   5  12  -5   11.24    3.36
   5  13  -5  113.36    3.84
   5  14  -5   16.20    4.04
   5  15  -5   19.79    3.98
   5  16  -5   34.74    3.94
 -18  -9  -6   18.06    4.20
   4   7  -6  459.13    6.01
   5  12  -6    7.47    3.36
   5  13  -6   24.10    3.36
   5  14  -6   98.50    4.32
   5  15  -6    2.85    3.91
   5  12  -7   14.26    3.39
   5  13  -7  105.19    4.43
   5  14  -7   81.63    4.26
   5  15  -7   26.19    3.99
 -14  -8  -8   -1.76    3.89
   3   5  -8  211.67    4.70
   4  19  -8   52.59    4.76
 -15  -8  -9   -0.19    4.51
   4   8  -9  126.62    4.17
   4  19  -9  -10.17    4.67
   4  18 -10    6.06    4.04
   2   4 -11   25.58    3.83
   3   6 -11  298.79    5.25
   4   9 -11  181.08    4.38
   4  18 -11    4.37    3.98
   4  10 -12    0.67    3.26
   4  17 -12    4.08    4.10
   3   7 -13   83.50    3.97
   4  11 -13   -2.53    3.23
   4  12 -13   52.77    4.22
   4  14 -13    9.39    3.82
   4  15 -13   15.36    3.75
   4  16 -13   -2.63    4.12
   3   8 -14   36.57    3.61
   2   6 -15   18.45    3.50
   3   9 -15  228.80    4.46
   2   7 -16   15.23    3.41
   3  10 -16    3.22    4.07
   3  16 -16    3.87    4.00
   3  17 -16   45.00    4.87
   2   8 -17    1.66    3.21
   3  13 -17    5.69    3.76
   3  14 -17    3.57    4.34
   2   9 -18   41.19    4.11
   2  11 -19   12.57    3.76
   2  12 -19    7.63    3.67
   2  14 -19   10.17    4.10
   2  15 -19   29.33    4.07
   1   9 -20   18.87    3.76
   1  11 -21    3.66    4.32
   1  12 -21   21.55    4.28
   1  14 -21    2.67    4.56
   0  13 -23   -1.74    4.43
  -3   6 -24   -0.02    4.30
  -2   8 -24   35.32    4.47
  -1  11 -24   43.50    4.72
  -4   6 -25   45.36    4.47
  -2  10 -25    1.66    4.55
  -5   6 -26   25.77    4.93
  -4   7  22  147.32   10.47
  -3   4  18   15.04    6.18
  -1   2  11   99.45    7.51
 -11  -3 -20    1.49    7.36
 -13  -3 -21    1.78    7.97
  -7   1 -23   17.06    7.70
 -12   3  28   36.03    6.81
 -13   1  27   -2.25    5.74
 -10   4  27    1.88    5.85
  -9   4  26   12.60    6.26
 -12   0  25   -0.49    6.16
  -8   4  25   -3.77    6.00
 -16  -3  24    6.66    5.67
 -14  -2  24   18.81    6.16
 -11   0  24   19.09    5.36
  -6   6  24    0.77    5.33
 -17  -4  23   56.13    6.65
 -10   0  23   -3.55    5.46
  -9   0  22  109.01    6.15
  -8   1  22  141.67    6.41
  -5   5  22    5.23    5.78
 -17  -5  21   13.07    5.65
  -9  -2  19   14.87    4.75
  -5   2  19   83.45    5.63
  -1  12  19   -0.49    6.56
  -1  15  19    2.30    5.76
 -18  -7  17   13.00    6.05
  -9  -3  17   40.44    4.87
   0  16  17   37.15    6.68
  -7  -2  16    5.90    4.93
  -4   1  16    0.38    5.11
   1  12  15    1.13    5.69
   1  15  15   21.78    6.33
  -3   1  14    1.70    5.22
  -9  -5  12   77.33    5.22
   2  17  12    5.10    5.97
 -20  -9  10  -11.84    6.07
  -8  -5  10   95.29    5.45
 -14  -8   9   -3.77    5.49
   3  17   9   14.40    6.12
 -11  -7   8    0.71    4.87
   3   9   8   64.96    5.60
   3  18   8    4.73    5.93
 -17  -9   7   -1.55    5.14
   3   8   7   43.11    5.49
   4  12   6   14.90    4.86
   4  13   6  142.47    6.57
   4  14   6   18.54    5.81
   4  15   6    3.16    5.53
 -16  -9   5    9.85    5.28
 -10  -7   5  589.43    7.13
  -8  -6   5   33.61    5.25
   4  17   5   51.57    6.59
   3   6   4  363.45    7.16
   4  18   4    7.83    6.14
 -12  -8   3   27.96    4.74
   4   8   2    1.10    5.21
   4  19   2   30.40    5.85
   2   3   1   93.55    6.03
   5  13   0   32.41    4.79
   5  14   0   37.05    5.78
   4  20   0   42.92    6.64
   4   7  -1   13.63    4.24
   5  12  -1  171.80    5.54
   5  15  -1  162.38    6.12
   4  20  -1   30.45    6.67
   5  11  -2   64.23    5.14
   5  16  -2   -2.06    5.37
 -16  -9  -3   10.08    5.32
 -12  -8  -3   -1.18    4.75
   5  11  -3  306.87    6.09
   5  16  -3   -5.17    5.30
 -17  -9  -4    7.79    6.19
 -18  -9  -5   21.12    5.96
  -3  -3  -5  406.46    9.54
   5  11  -5   86.67    5.12
 -19  -9  -6    2.34    6.61
 -13  -8  -6   -2.24    5.71
 -10  -7  -6    1.61    4.98
   5  11  -6    5.74    4.84
   5  16  -6   92.86    5.54
  -8  -6  -7    3.18    5.00
   4   7  -7    0.40    5.11
   5  16  -7   -0.66    5.16
   2   3  -8  447.00    7.68
   5  12  -8   -1.87    4.65
   5  13  -8   79.92    5.92
   5  14  -8  212.88    6.25
   5  15  -8   -6.34    5.48
 -17  -8 -10   17.07    5.89
 -12  -7 -10  107.50    6.12
   1   2 -10   24.23    4.39
   4   8 -10    9.91    5.00
   4  19 -10   11.68    6.45
 -13  -7 -11   45.25    5.72
   0   1 -11   31.74    4.60
 -14  -7 -12   31.18    6.03
  -8  -5 -12   52.10    5.30
 -16  -7 -13   71.78    6.21
   1   3 -13  386.14    7.48
   4  13 -14   64.70    5.63
   4  14 -14   64.81    5.44
   4  15 -14   33.67    6.32
 -14  -6 -15   13.39    6.07
  -8  -4 -15   39.78    5.23
   1   4 -15   -0.01    4.91
 -16  -6 -16    6.47    6.47
 -13  -5 -17   14.69    6.17
   3  12 -17  155.20    5.90
   3  15 -17    0.82    5.74
 -15  -5 -18   13.52    6.61
 -11  -4 -18  105.29    6.51
  -1   3 -18   51.65    5.14
  -3   2 -20   -2.67    5.74
  -2   4 -21   29.53    5.80
  -2   5 -22   30.16    5.42
   0   9 -22   10.68    5.03
  -2   6 -23  253.17    6.64
  -1   8 -23   -2.11    6.15
   0  12 -23   44.97    6.22
  -1  10 -24    4.80    5.59
 -12   2  27   94.79    4.75
 -11   3  27   32.79    4.45
 -15  -1  26   -4.81    4.76
 -12   1  26    9.70    4.18
 -11   1  25    7.48    4.43
  -8   3  24   42.48    4.24
 -15  -3  23   -0.39    4.19
 -13  -2  23    2.02    4.48
  -9   1  23    8.24    3.97
  -8   2  23    3.45    3.99
 -16  -4  22   -0.39    4.07
 -12  -2  22   70.79    4.27
 -11  -2  21    3.89    3.95
 -16  -5  20   16.95    4.26
 -10  -2  20   20.21    4.23
 -18  -6  19    3.42    4.02
  -8  -1  19   81.97    3.97
 -16  -6  18    4.58    4.28
 -19  -7  17   39.87    4.24
 -15  -6  17    9.83    3.79
 -17  -7  16   -3.07    4.27
 -14  -6  16   -2.59    3.88
 -10  -4  16   35.50    3.58
  -6  -1  16    0.34    3.63
 -16  -7  15    0.68    3.64
 -13  -6  15   -2.43    3.92
 -11  -5  15   49.96    3.64
   1  16  15   -1.54    4.26
 -20  -8  14    9.72    4.69
 -19  -8  14    4.59    4.03
 -15  -7  14   41.88    3.95
  -6  -2  14  321.28    5.71
 -18  -8  13    1.52    4.14
 -14  -7  13   16.90    3.94
  -8  -4  13    6.05    3.46
 -17  -8  12   17.11    4.44
 -11  -6  12   42.21    3.62
  -5  -2  12  205.73    5.30
  -3   0  12  578.04    8.51
   2  10  12  226.48    5.61
 -16  -8  11    1.67    3.67
 -13  -7  11   64.70    4.30
  -7  -4  11  286.46    5.30
 -15  -8  10   12.57    3.93
 -12  -7  10    7.20    3.33
 -10  -6  10    3.71    3.48
   3  13  10   22.47    4.28
   3  14  10   97.89    4.59
   3  15  10   48.35    4.26
 -20  -9   9   56.35    4.30
 -19  -9   9   13.23    4.22
   3  10   9   33.91    3.85
 -19  -9   8    3.69    4.09
 -18  -9   8   10.68    4.20
 -14  -8   8    5.55    3.98
  -9  -6   8   -2.01    3.57
[truncated: 2,115,466 more chars]
