# Supplementary material for: Spin relaxation in antiferromagnetic Fe–Fe dimers slowed down by anisotropic DyIII ions
Source: Beilstein J Nanotechnol. 2013 Nov 27;4:807–14. doi: 10.3762/bjnano.4.92 (PMC3869222; doi:10.3762/bjnano.4.92)
Supplement: File 1 — CIF files for the crystal structures of 1 and 2. [file Beilstein_J_Nanotechnol-04-807-s001.zip › L618.cif]

_publ_contact_author
; 
'Annie K. Powell'
;
_publ_contact_author_email        annie.powell@kit.edu
_publ_contact_author_phone        '+49 721 608 42135'
_publ_requested_journal           'Beilstein Journal of Nanotechnology'
_publ_section_title
; 
Spin relaxation in a Fe-Fe antiferromagnetic dimer slowed down 
by anisotropic Dy ions
;
loop_
_publ_author_name
_publ_author_address
    'Valeriu Mereacre'
; Institut f\"ur Anorganische Chemie
  Karlsruhe Institute of Technology
  Engesserstr. 15
  D-76131 Karlsruhe
  Germany
;
    'Frederik Kloewer'
; Institut f\"ur Anorganische Chemie
  Karlsruhe Institute of Technology
  Engesserstr. 15
  D-76131 Karlsruhe
  Germany
;
    'Rodolphe Clerac'
; Centre de Recherche Paul Pascal
  CNRS UPR 8641
  Avenue Dr. A. Schweitzer
  33600 Pessac
  France
;
    'Christopher E. Anson'
; Institut f\"ur Anorganische Chemie
  Karlsruhe Institute of Technology
  Engesserstr. 15
  D-76131 Karlsruhe
  Germany
;
    'Annie K. Powell'
; Institut f\"ur Anorganische Chemie
  Karlsruhe Institute of Technology
  Engesserstr. 15
  D-76131 Karlsruhe
  Germany
;
 
data_L618
 
_audit_creation_method            SHELXL-2013
_chemical_name_systematic
;
 ?
;
_chemical_name_common             ?
_chemical_melting_point           ?
_chemical_formula_moiety          
 'C62 H124 Dy2 Fe4 N10 O22, 3(C2 H3 N)'
_chemical_formula_sum
 'C68 H133 Dy2 Fe4 N13 O22' 
_chemical_formula_weight          2033.27

loop_
 _atom_type_symbol
 _atom_type_description
 _atom_type_scat_dispersion_real
 _atom_type_scat_dispersion_imag
 _atom_type_scat_source
 'C'  'C'   0.0033   0.0016
 'International Tables Vol C Tables 4.2.6.8 and 6.1.1.4'
 'H'  'H'   0.0000   0.0000
 'International Tables Vol C Tables 4.2.6.8 and 6.1.1.4'
 'N'  'N'   0.0061   0.0033
 'International Tables Vol C Tables 4.2.6.8 and 6.1.1.4'
 'O'  'O'   0.0106   0.0060
 'International Tables Vol C Tables 4.2.6.8 and 6.1.1.4'
 'Fe'  'Fe'   0.3463   0.8444
 'International Tables Vol C Tables 4.2.6.8 and 6.1.1.4'
 'Dy'  'Dy'  -0.1892   4.4098
 'International Tables Vol C Tables 4.2.6.8 and 6.1.1.4'
 
_space_group_crystal_system       triclinic
_space_group_IT_number            2
_space_group_name_H-M_alt         'P -1'
_space_group_name_Hall            '-P 1'
 
_shelx_space_group_comment
;
The symmetry employed for this shelxl refinement is uniquely defined
by the following loop, which should always be used as a source of
symmetry information in preference to the above space-group names.
They are only intended as comments.
;
 
loop_
 _space_group_symop_operation_xyz
 'x, y, z'
 '-x, -y, -z'
 
_cell_length_a                    13.9237(6)
_cell_length_b                    14.5196(7)
_cell_length_c                    25.1289(10)
_cell_angle_alpha                 82.856(3)
_cell_angle_beta                  79.710(3)
_cell_angle_gamma                 65.545(3)
_cell_volume                      4542.9(4)
_cell_formula_units_Z             2
_cell_measurement_temperature     150(2)
_cell_measurement_reflns_used     72979 
_cell_measurement_theta_min       1.54 
_cell_measurement_theta_max       28.44 
 
_exptl_crystal_description        block 
_exptl_crystal_colour             orange 
_exptl_crystal_density_meas       ? 
_exptl_crystal_density_method     ?              
_exptl_crystal_density_diffrn     1.486          
_exptl_crystal_F_000              2088
_exptl_transmission_factor_min    ?                                             
_exptl_transmission_factor_max    ?                                             
_exptl_crystal_size_max           0.320
_exptl_crystal_size_mid           0.290
_exptl_crystal_size_min           0.210
_exptl_absorpt_coefficient_mu     2.315
_shelx_estimated_absorpt_T_min    0.524
_shelx_estimated_absorpt_T_max    0.642
_exptl_absorpt_correction_type    multi-scan 
_exptl_absorpt_correction_T_min   0.472 
_exptl_absorpt_correction_T_max   0.610 
_exptl_absorpt_process_details    
;
XPREP in SHELXTL 6.14 (BrukerAXS Inc., 2003)
; 
 
 
_exptl_special_details
;
 ?
;
 
_diffrn_ambient_temperature       150(2)
_diffrn_radiation_wavelength      0.71073
_diffrn_radiation_type            MoK\a
_diffrn_source                    'fine-focus sealed tube'                       
_diffrn_measurement_device_type   'Stoe IPDS II' 
_diffrn_measurement_method        'area detector, \w-scans' 
_diffrn_detector_area_resol_mean  6.667 
_diffrn_reflns_number             62413
_diffrn_reflns_av_unetI/netI      0.0314
_diffrn_reflns_av_R_equivalents   0.0342
_diffrn_reflns_limit_h_min        -18
_diffrn_reflns_limit_h_max        17
_diffrn_reflns_limit_k_min        -19
_diffrn_reflns_limit_k_max        19
_diffrn_reflns_limit_l_min        -33
_diffrn_reflns_limit_l_max        33
_diffrn_reflns_theta_min          1.543
_diffrn_reflns_theta_max          27.950
_diffrn_reflns_theta_full         25.250
_diffrn_measured_fraction_theta_max   0.992
_diffrn_measured_fraction_theta_full  0.998
_diffrn_reflns_Laue_measured_fraction_max    0.992
_diffrn_reflns_Laue_measured_fraction_full   0.998
_diffrn_reflns_point_group_measured_fraction_max   0.992
_diffrn_reflns_point_group_measured_fraction_full  0.998
_reflns_number_total              21679
_reflns_number_gt                 17985
_reflns_threshold_expression      'I > 2\s(I)'
_reflns_Friedel_coverage          0.000
_reflns_Friedel_fraction_max      .
_reflns_Friedel_fraction_full     .
 
_reflns_special_details
;
 Reflections were merged by SHELXL according to the crystal
 class for the calculation of statistics and refinement.
 
 _reflns_Friedel_fraction is defined as the number of unique
 Friedel pairs measured divided by the number that would be
 possible theoretically, ignoring centric projections and
 systematic absences.
;
 
_computing_data_collection        'WinXpose 1.6.8 (Stoe & Cie GmbH, 2004)' 
_computing_cell_refinement        'X-Area 1.38 (Stoe & Cie GmbH, 2006)' 
_computing_data_reduction         'X-Area 1.38 (Stoe & Cie GmbH, 2006)' 
_computing_structure_solution     'SHELXL-2013 (Sheldrick, 2013)' 
_computing_structure_refinement   'SHELXL-2013 (Sheldrick, 2013)' 
_computing_molecular_graphics     'Diamond 2.1 (Crystal Impact, 1998)' 
_computing_publication_material   'SHELXL-2013 (Sheldrick, 2013)' 
 
_refine_special_details
;
 One t-butyl group was rotationally disordered, and refined using partial-
 occupancy (50:50) isotropic carbon atoms with geomtrical restraints.
 O-H distances were restrained to 0.92(4) Ang.
 One of the lattice MeCN was disordered; geometrical restraints were
 applied.
;
_refine_ls_structure_factor_coef  Fsqd
_refine_ls_matrix_type            full
_refine_ls_weighting_scheme       calc
_refine_ls_weighting_details
;
 w=1/[\s^2^(Fo^2^)+(0.0892P)^2^]
 where P=(Fo^2^+2Fc^2^)/3
;
_atom_sites_solution_primary      direct
_atom_sites_solution_secondary    difmap
_atom_sites_solution_hydrogens    mixed
_refine_ls_hydrogen_treatment     mixed
_refine_ls_extinction_method      none
_refine_ls_extinction_coef        .
_refine_ls_number_reflns          21679
_refine_ls_number_parameters      979
_refine_ls_number_restraints      50
_refine_ls_R_factor_all           0.0543
_refine_ls_R_factor_gt            0.0449
_refine_ls_wR_factor_ref          0.1201
_refine_ls_wR_factor_gt           0.1161
_refine_ls_goodness_of_fit_ref    1.018
_refine_ls_restrained_S_all       1.022
_refine_ls_shift/su_max           0.001
_refine_ls_shift/su_mean          0.000
 
loop_
 _atom_site_label
 _atom_site_type_symbol
 _atom_site_fract_x
 _atom_site_fract_y
 _atom_site_fract_z
 _atom_site_U_iso_or_equiv
 _atom_site_adp_type
 _atom_site_occupancy
 _atom_site_site_symmetry_order  
 _atom_site_calc_flag
 _atom_site_refinement_flags_posn
 _atom_site_refinement_flags_adp
 _atom_site_refinement_flags_occupancy
 _atom_site_disorder_assembly
 _atom_site_disorder_group
Dy1 Dy 0.04645(2) 0.64244(2) 0.20153(2) 0.02417(5) Uani 1 1 d . . . . .
Dy2 Dy 0.24319(2) 0.50721(2) 0.30534(2) 0.02486(5) Uani 1 1 d . . . . .
Fe1 Fe 0.10572(4) 0.76150(4) 0.29676(2) 0.02530(11) Uani 1 1 d . . . . .
Fe2 Fe -0.04559(4) 0.90239(4) 0.21137(2) 0.02684(11) Uani 1 1 d . . . . .
Fe3 Fe 0.05111(4) 0.42752(4) 0.27339(2) 0.02434(10) Uani 1 1 d . . . . .
Fe4 Fe 0.22494(4) 0.27404(4) 0.34443(2) 0.02667(11) Uani 1 1 d . . . . .
O1 O 0.1776(2) 0.65701(19) 0.24467(10) 0.0264(5) Uani 1 1 d D . . . .
H1 H 0.234(3) 0.663(4) 0.2269(18) 0.032 Uiso 1 1 d D U . . .
O2 O 0.1565(2) 0.48066(19) 0.23993(10) 0.0264(5) Uani 1 1 d D . . . .
H2 H 0.196(4) 0.447(3) 0.2093(15) 0.032 Uiso 1 1 d D U . . .
N1 N -0.0073(3) 0.8425(2) 0.36494(13) 0.0287(6) Uani 1 1 d . . . . .
C1 C -0.1167(3) 0.8624(3) 0.35457(17) 0.0334(8) Uani 1 1 d . . . . .
H1A H -0.1512 0.9336 0.3408 0.040 Uiso 1 1 calc R U . . .
H1B H -0.1595 0.8533 0.3892 0.040 Uiso 1 1 calc R U . . .
C2 C -0.1165(3) 0.7925(3) 0.31378(16) 0.0311(8) Uani 1 1 d . . . . .
H2A H -0.1038 0.7246 0.3316 0.037 Uiso 1 1 calc R U . . .
H2B H -0.1869 0.8198 0.3011 0.037 Uiso 1 1 calc R U . . .
O3 O -0.0351(2) 0.78406(19) 0.26826(10) 0.0264(5) Uani 1 1 d . . . . .
C3 C 0.0278(4) 0.7701(3) 0.41201(16) 0.0350(8) Uani 1 1 d . . . . .
H3A H -0.0274 0.7915 0.4441 0.042 Uiso 1 1 calc R U . . .
H3B H 0.0944 0.7701 0.4207 0.042 Uiso 1 1 calc R U . . .
C4 C 0.0466(4) 0.6644(3) 0.39888(16) 0.0341(8) Uani 1 1 d . . . . .
H4A H 0.0893 0.6141 0.4251 0.041 Uiso 1 1 calc R U . . .
H4B H -0.0226 0.6585 0.4022 0.041 Uiso 1 1 calc R U . . .
O4 O 0.1009(2) 0.64375(19) 0.34582(10) 0.0277(5) Uani 1 1 d . . . . .
C5 C 0.0024(3) 0.9389(3) 0.37092(16) 0.0314(8) Uani 1 1 d . . . . .
H5A H -0.0127 0.9817 0.3370 0.038 Uiso 1 1 calc R U . . .
H5B H 0.0772 0.9228 0.3750 0.038 Uiso 1 1 calc R U . . .
C6 C -0.0701(4) 1.0010(3) 0.41835(17) 0.0350(8) Uani 1 1 d . . . . .
H6A H -0.0633 0.9568 0.4521 0.042 Uiso 1 1 calc R U . . .
H6B H -0.1452 1.0281 0.4118 0.042 Uiso 1 1 calc R U . . .
C7 C -0.0400(4) 1.0886(3) 0.42502(18) 0.0396(9) Uani 1 1 d . . . . .
H7A H 0.0346 1.0609 0.4324 0.048 Uiso 1 1 calc R U . . .
H7B H -0.0443 1.1309 0.3907 0.048 Uiso 1 1 calc R U . . .
C8 C -0.1120(5) 1.1542(3) 0.47048(19) 0.0483(12) Uani 1 1 d . . . . .
H8A H -0.0899 1.2091 0.4733 0.072 Uiso 1 1 calc R U . . .
H8B H -0.1069 1.1129 0.5047 0.072 Uiso 1 1 calc R U . . .
H8C H -0.1857 1.1830 0.4629 0.072 Uiso 1 1 calc R U . . .
N2 N 0.0268(3) 0.9920(2) 0.15404(14) 0.0330(7) Uani 1 1 d . . . . .
C9 C 0.0841(4) 1.0230(3) 0.18832(19) 0.0386(9) Uani 1 1 d . . . . .
H9A H 0.0320 1.0797 0.2101 0.046 Uiso 1 1 calc R U . . .
H9B H 0.1346 1.0476 0.1646 0.046 Uiso 1 1 calc R U . . .
C10 C 0.1456(3) 0.9353(3) 0.22636(19) 0.0363(9) Uani 1 1 d . . . . .
H10A H 0.2115 0.8875 0.2059 0.044 Uiso 1 1 calc R U . . .
H10B H 0.1656 0.9615 0.2553 0.044 Uiso 1 1 calc R U . . .
O5 O 0.0777(2) 0.88570(19) 0.24909(11) 0.0291(5) Uani 1 1 d . . . . .
C11 C 0.1013(4) 0.9219(3) 0.11160(18) 0.0385(9) Uani 1 1 d . . . . .
H11A H 0.1652 0.9373 0.1007 0.046 Uiso 1 1 calc R U . . .
H11B H 0.0656 0.9331 0.0792 0.046 Uiso 1 1 calc R U . . .
C12 C 0.1351(4) 0.8114(3) 0.13235(19) 0.0400(9) Uani 1 1 d . . . . .
H12A H 0.1682 0.7668 0.1016 0.048 Uiso 1 1 calc R U . . .
H12B H 0.1884 0.7945 0.1573 0.048 Uiso 1 1 calc R U . . .
O6 O 0.0440(2) 0.79596(19) 0.15999(11) 0.0294(5) Uani 1 1 d . . . . .
C13 C -0.0488(4) 1.0864(3) 0.12855(18) 0.0376(9) Uani 1 1 d . . . . .
H13A H -0.0067 1.1183 0.1033 0.045 Uiso 1 1 calc R U . . .
H13B H -0.0903 1.1340 0.1573 0.045 Uiso 1 1 calc R U . . .
C14 C -0.1264(5) 1.0738(4) 0.0979(2) 0.0487(11) Uani 1 1 d . . . . .
H14A H -0.0861 1.0315 0.0667 0.058 Uiso 1 1 calc R U . . .
H14B H -0.1659 1.0380 0.1219 0.058 Uiso 1 1 calc R U . . .
C15 C -0.2046(5) 1.1744(4) 0.0774(3) 0.0609(15) Uani 1 1 d . . . . .
H15A H -0.2452 1.2157 0.1089 0.073 Uiso 1 1 calc R U . . .
H15B H -0.1643 1.2106 0.0544 0.073 Uiso 1 1 calc R U . . .
C16 C -0.2818(6) 1.1670(5) 0.0456(3) 0.0711(18) Uani 1 1 d . . . . .
H16A H -0.3297 1.2352 0.0340 0.107 Uiso 1 1 calc R U . . .
H16B H -0.3237 1.1328 0.0682 0.107 Uiso 1 1 calc R U . . .
H16C H -0.2428 1.1282 0.0137 0.107 Uiso 1 1 calc R U . . .
N3 N -0.0911(3) 0.4237(2) 0.33048(13) 0.0276(6) Uani 1 1 d . . . . .
C17 C -0.0522(3) 0.3902(3) 0.38369(15) 0.0311(8) Uani 1 1 d . . . . .
H17A H -0.0141 0.3155 0.3861 0.037 Uiso 1 1 calc R U . . .
H17B H -0.1134 0.4097 0.4131 0.037 Uiso 1 1 calc R U . . .
C18 C 0.0233(3) 0.4395(3) 0.39031(15) 0.0318(8) Uani 1 1 d . . . . .
H18A H -0.0172 0.5136 0.3925 0.038 Uiso 1 1 calc R U . . .
H18B H 0.0541 0.4125 0.4244 0.038 Uiso 1 1 calc R U . . .
O7 O 0.1070(2) 0.41941(19) 0.34553(10) 0.0259(5) Uani 1 1 d . . . . .
C19 C -0.1745(3) 0.5298(3) 0.33018(17) 0.0314(8) Uani 1 1 d . . . . .
H19A H -0.1720 0.5648 0.3610 0.038 Uiso 1 1 calc R U . . .
H19B H -0.2460 0.5286 0.3342 0.038 Uiso 1 1 calc R U . . .
C20 C -0.1547(3) 0.5866(3) 0.27727(17) 0.0299(7) Uani 1 1 d . . . . .
H20A H -0.1699 0.5596 0.2469 0.036 Uiso 1 1 calc R U . . .
H20B H -0.2020 0.6595 0.2790 0.036 Uiso 1 1 calc R U . . .
O8 O -0.0472(2) 0.57368(19) 0.26903(10) 0.0267(5) Uani 1 1 d . . . . .
C21 C -0.1272(3) 0.3512(3) 0.31214(16) 0.0315(8) Uani 1 1 d . . . . .
H21A H -0.0656 0.2850 0.3082 0.038 Uiso 1 1 calc R U . . .
H21B H -0.1486 0.3757 0.2758 0.038 Uiso 1 1 calc R U . . .
C22 C -0.2188(3) 0.3341(3) 0.34835(17) 0.0353(8) Uani 1 1 d . . . . .
H22A H -0.2828 0.3987 0.3506 0.042 Uiso 1 1 calc R U . . .
H22B H -0.1998 0.3120 0.3853 0.042 Uiso 1 1 calc R U . . .
C23 C -0.2447(4) 0.2540(4) 0.3269(2) 0.0476(11) Uani 1 1 d . . . . .
H23A H -0.2605 0.2747 0.2893 0.057 Uiso 1 1 calc R U . . .
H23B H -0.1817 0.1886 0.3262 0.057 Uiso 1 1 calc R U . . .
C24 C -0.3394(5) 0.2404(5) 0.3617(3) 0.0638(16) Uani 1 1 d . . . . .
H24A H -0.3538 0.1887 0.3469 0.096 Uiso 1 1 calc R U . . .
H24B H -0.4022 0.3047 0.3619 0.096 Uiso 1 1 calc R U . . .
H24C H -0.3235 0.2188 0.3988 0.096 Uiso 1 1 calc R U . . .
N4 N 0.3376(3) 0.1407(2) 0.29890(15) 0.0345(7) Uani 1 1 d . . . . .
C25 C 0.2671(4) 0.1117(3) 0.2729(2) 0.0399(9) Uani 1 1 d . . . . .
H25A H 0.2313 0.0766 0.3003 0.048 Uiso 1 1 calc R U . . .
H25B H 0.3105 0.0641 0.2443 0.048 Uiso 1 1 calc R U . . .
C26 C 0.1833(4) 0.2046(3) 0.24799(19) 0.0391(9) Uani 1 1 d . . . . .
H26A H 0.2165 0.2296 0.2144 0.047 Uiso 1 1 calc R U . . .
H26B H 0.1271 0.1870 0.2387 0.047 Uiso 1 1 calc R U . . .
O9 O 0.1385(2) 0.28060(19) 0.28619(11) 0.0291(5) Uani 1 1 d . . . . .
C27 C 0.4068(4) 0.1782(3) 0.25764(19) 0.0399(9) Uani 1 1 d . . . . .
H27A H 0.3749 0.2000 0.2236 0.048 Uiso 1 1 calc R U . . .
H27B H 0.4779 0.1225 0.2497 0.048 Uiso 1 1 calc R U . . .
C28 C 0.4191(3) 0.2664(3) 0.2778(2) 0.0407(10) Uani 1 1 d . . . . .
H28A H 0.4699 0.2411 0.3046 0.049 Uiso 1 1 calc R U . . .
H28B H 0.4476 0.3021 0.2472 0.049 Uiso 1 1 calc R U . . .
O10 O 0.3190(2) 0.33366(19) 0.30205(11) 0.0288(5) Uani 1 1 d . . . . .
C29 C 0.4008(4) 0.0506(3) 0.3326(2) 0.0391(9) Uani 1 1 d . . . . .
H29A H 0.4445 -0.0054 0.3085 0.047 Uiso 1 1 calc R U . . .
H29B H 0.3505 0.0284 0.3582 0.047 Uiso 1 1 calc R U . . .
C30 C 0.4735(4) 0.0677(3) 0.3647(2) 0.0430(10) Uani 1 1 d . . . . .
H30A H 0.4315 0.1266 0.3872 0.052 Uiso 1 1 calc R U . . .
H30B H 0.5285 0.0835 0.3394 0.052 Uiso 1 1 calc R U . . .
C31 C 0.5275(5) -0.0243(4) 0.4011(2) 0.0523(12) Uani 1 1 d . . . . .
H31A H 0.5691 -0.0832 0.3786 0.063 Uiso 1 1 calc R U . . .
H31B H 0.4723 -0.0401 0.4263 0.063 Uiso 1 1 calc R U . . .
C32 C 0.6012(5) -0.0093(4) 0.4337(3) 0.0572(13) Uani 1 1 d . . . . .
H32A H 0.6334 -0.0706 0.4566 0.086 Uiso 1 1 calc R U . . .
H32B H 0.5603 0.0483 0.4565 0.086 Uiso 1 1 calc R U . . .
H32C H 0.6574 0.0043 0.4090 0.086 Uiso 1 1 calc R U . . .
O11 O 0.2275(2) 0.7709(2) 0.32203(12) 0.0312(6) Uani 1 1 d . . . . .
O12 O 0.3279(2) 0.6044(2) 0.33209(12) 0.0344(6) Uani 1 1 d . . . . .
C33 C 0.3106(3) 0.6952(3) 0.33609(16) 0.0312(8) Uani 1 1 d . . . . .
C34 C 0.3890(3) 0.7228(3) 0.35863(19) 0.0372(9) Uani 1 1 d . . . . .
C35 C 0.4785(4) 0.6292(4) 0.3789(2) 0.0506(12) Uani 1 1 d . . . . .
H35A H 0.4487 0.5942 0.4088 0.076 Uiso 1 1 calc R U . . .
H35B H 0.5290 0.6494 0.3918 0.076 Uiso 1 1 calc R U . . .
H35C H 0.5155 0.5835 0.3493 0.076 Uiso 1 1 calc R U . . .
C36 C 0.3289(5) 0.7947(6) 0.4042(3) 0.075(2) Uani 1 1 d . . . . .
H36A H 0.2993 0.7597 0.4340 0.112 Uiso 1 1 calc R U . . .
H36B H 0.2710 0.8540 0.3905 0.112 Uiso 1 1 calc R U . . .
H36C H 0.3780 0.8166 0.4172 0.112 Uiso 1 1 calc R U . . .
C37 C 0.4360(5) 0.7787(4) 0.3116(3) 0.0595(15) Uani 1 1 d . . . . .
H37A H 0.4747 0.7328 0.2823 0.089 Uiso 1 1 calc R U . . .
H37B H 0.4849 0.8005 0.3248 0.089 Uiso 1 1 calc R U . . .
H37C H 0.3780 0.8381 0.2980 0.089 Uiso 1 1 calc R U . . .
O13 O 0.0126(2) 0.3953(2) 0.20843(11) 0.0294(5) Uani 1 1 d . . . . .
O14 O 0.0062(2) 0.5330(2) 0.15479(11) 0.0307(5) Uani 1 1 d . . . . .
C38 C 0.0005(3) 0.4490(3) 0.16320(15) 0.0288(7) Uani 1 1 d . . . . .
C39 C -0.0211(4) 0.4013(3) 0.11848(17) 0.0371(9) Uani 1 1 d . . . . .
C40 C -0.1097(5) 0.3657(4) 0.1410(2) 0.0551(13) Uani 1 1 d . . . . .
H40A H -0.1759 0.4244 0.1511 0.083 Uiso 1 1 calc R U . . .
H40B H -0.0901 0.3199 0.1731 0.083 Uiso 1 1 calc R U . . .
H40C H -0.1200 0.3298 0.1135 0.083 Uiso 1 1 calc R U . . .
C41 C -0.0529(7) 0.4767(5) 0.0711(2) 0.072(2) Uani 1 1 d . . . . .
H41A H -0.1186 0.5346 0.0828 0.108 Uiso 1 1 calc R U . . .
H41B H -0.0648 0.4443 0.0424 0.108 Uiso 1 1 calc R U . . .
H41C H 0.0041 0.5000 0.0572 0.108 Uiso 1 1 calc R U . . .
C42 C 0.0821(5) 0.3083(5) 0.1027(3) 0.0655(16) Uani 1 1 d . . . . .
H42A H 0.1399 0.3303 0.0883 0.098 Uiso 1 1 calc R U . . .
H42B H 0.0711 0.2731 0.0749 0.098 Uiso 1 1 calc R U . . .
H42C H 0.1010 0.2622 0.1347 0.098 Uiso 1 1 calc R U . . .
O15 O -0.1755(2) 0.9008(2) 0.18919(12) 0.0346(6) Uani 1 1 d . . . . .
O16 O -0.1293(2) 0.7345(2) 0.18346(12) 0.0325(6) Uani 1 1 d . . . . .
C43 C -0.1950(3) 0.8257(3) 0.18078(17) 0.0329(8) Uani 1 1 d . . . . .
C44 C -0.3075(4) 0.8501(3) 0.1689(2) 0.0447(11) Uani 1 1 d . . . . .
C45 C -0.3435(5) 0.9442(5) 0.1306(3) 0.0593(15) Uani 1 1 d . . . . .
H45A H -0.4156 0.9593 0.1233 0.089 Uiso 1 1 calc R U . . .
H45B H -0.2945 0.9319 0.0965 0.089 Uiso 1 1 calc R U . . .
H45C H -0.3438 1.0018 0.1472 0.089 Uiso 1 1 calc R U . . .
C46 C -0.3799(5) 0.8749(7) 0.2230(3) 0.090(3) Uani 1 1 d . . . . .
H46A H -0.3582 0.8154 0.2484 0.135 Uiso 1 1 calc R U . . .
H46B H -0.4538 0.8937 0.2175 0.135 Uiso 1 1 calc R U . . .
H46C H -0.3743 0.9316 0.2377 0.135 Uiso 1 1 calc R U . . .
C47 C -0.3116(7) 0.7610(5) 0.1461(5) 0.130(5) Uani 1 1 d . . . . .
H47A H -0.2883 0.7018 0.1716 0.195 Uiso 1 1 calc R U . . .
H47B H -0.2644 0.7461 0.1115 0.195 Uiso 1 1 calc R U . . .
H47C H -0.3848 0.7771 0.1404 0.195 Uiso 1 1 calc R U . . .
O17 O 0.2697(2) 0.2966(2) 0.41267(11) 0.0333(6) Uani 1 1 d . . . . .
O18 O 0.2674(2) 0.4529(2) 0.39565(11) 0.0333(6) Uani 1 1 d . . . . .
C48 C 0.2813(3) 0.3735(3) 0.42516(16) 0.0315(8) Uani 1 1 d . . . . .
C49 C 0.3115(4) 0.3668(3) 0.48177(17) 0.0401(9) Uani 1 1 d . . . . .
C50 C 0.2220(7) 0.3511(6) 0.5227(2) 0.076(2) Uani 1 1 d . . . . .
H50A H 0.1549 0.4106 0.5205 0.114 Uiso 1 1 calc R U . . .
H50B H 0.2405 0.3418 0.5595 0.114 Uiso 1 1 calc R U . . .
H50C H 0.2137 0.2909 0.5142 0.114 Uiso 1 1 calc R U . . .
C51 C 0.4142(6) 0.2735(5) 0.4866(3) 0.075(2) Uani 1 1 d . . . . .
H51A H 0.4339 0.2678 0.5228 0.113 Uiso 1 1 calc R U . . .
H51B H 0.4711 0.2797 0.4592 0.113 Uiso 1 1 calc R U . . .
H51C H 0.4036 0.2129 0.4810 0.113 Uiso 1 1 calc R U . . .
C52 C 0.3169(7) 0.4635(5) 0.4934(2) 0.072(2) Uani 1 1 d . . . . .
H52A H 0.2484 0.5203 0.4896 0.108 Uiso 1 1 calc R U . . .
H52B H 0.3734 0.4749 0.4678 0.108 Uiso 1 1 calc R U . . .
H52C H 0.3326 0.4584 0.5305 0.108 Uiso 1 1 calc R U . . .
O19 O 0.1823(2) 0.5862(2) 0.13153(11) 0.0335(6) Uani 1 1 d . . . . .
O20 O 0.2667(3) 0.4185(2) 0.14668(13) 0.0447(7) Uani 1 1 d . . . . .
C53 C 0.2497(4) 0.4979(3) 0.11743(17) 0.0367(9) Uani 1 1 d . . . . .
C54 C 0.3121(4) 0.4911(4) 0.0600(2) 0.0466(10) Uiso 1 1 d D . . . .
C55A C 0.3318(11) 0.5830(8) 0.0392(6) 0.070(3) Uiso 0.5 1 d D . P A 1
H55A H 0.2636 0.6416 0.0384 0.105 Uiso 0.5 1 calc R U P A 1
H55B H 0.3715 0.5729 0.0025 0.105 Uiso 0.5 1 calc R U P A 1
H55C H 0.3735 0.5952 0.0630 0.105 Uiso 0.5 1 calc R U P A 1
C56A C 0.4219(9) 0.3959(8) 0.0619(5) 0.065(3) Uiso 0.5 1 d D . P A 1
H56A H 0.4098 0.3336 0.0639 0.097 Uiso 0.5 1 calc R U P A 1
H56B H 0.4528 0.3972 0.0937 0.097 Uiso 0.5 1 calc R U P A 1
H56C H 0.4712 0.3980 0.0290 0.097 Uiso 0.5 1 calc R U P A 1
C57A C 0.2509(10) 0.4638(10) 0.0241(6) 0.074(4) Uiso 0.5 1 d D . P A 1
H57A H 0.1821 0.5207 0.0211 0.111 Uiso 0.5 1 calc R U P A 1
H57B H 0.2390 0.4037 0.0403 0.111 Uiso 0.5 1 calc R U P A 1
H57C H 0.2924 0.4495 -0.0120 0.111 Uiso 0.5 1 calc R U P A 1
C55B C 0.3704(9) 0.5639(8) 0.0559(5) 0.051(2) Uiso 0.5 1 d D . P A 2
H55D H 0.3182 0.6343 0.0543 0.077 Uiso 0.5 1 calc R U P A 2
H55E H 0.4230 0.5515 0.0232 0.077 Uiso 0.5 1 calc R U P A 2
H55F H 0.4065 0.5515 0.0878 0.077 Uiso 0.5 1 calc R U P A 2
C56B C 0.3862(12) 0.3879(8) 0.0444(7) 0.083(4) Uiso 0.5 1 d D . P A 2
H56D H 0.3550 0.3639 0.0200 0.124 Uiso 0.5 1 calc R U P A 2
H56E H 0.3988 0.3421 0.0770 0.124 Uiso 0.5 1 calc R U P A 2
H56F H 0.4539 0.3891 0.0260 0.124 Uiso 0.5 1 calc R U P A 2
C57B C 0.2279(13) 0.5420(12) 0.0196(7) 0.106(6) Uiso 0.5 1 d D . P A 2
H57D H 0.1704 0.6029 0.0349 0.159 Uiso 0.5 1 calc R U P A 2
H57E H 0.1983 0.4941 0.0136 0.159 Uiso 0.5 1 calc R U P A 2
H57F H 0.2626 0.5606 -0.0150 0.159 Uiso 0.5 1 calc R U P A 2
O21 O 0.3885(2) 0.4840(2) 0.24203(12) 0.0331(6) Uani 1 1 d . . . . .
O22 O 0.3685(2) 0.6292(2) 0.19373(14) 0.0440(8) Uani 1 1 d . . . . .
C58 C 0.4251(3) 0.5414(3) 0.21018(17) 0.0340(8) Uani 1 1 d . . . . .
C59 C 0.5465(3) 0.4984(3) 0.19219(19) 0.0402(9) Uani 1 1 d . . . . .
C60 C 0.5747(5) 0.5638(6) 0.1447(3) 0.094(3) Uani 1 1 d . . . . .
H60A H 0.6520 0.5358 0.1338 0.140 Uiso 1 1 calc R U . . .
H60B H 0.5507 0.6332 0.1558 0.140 Uiso 1 1 calc R U . . .
H60C H 0.5393 0.5645 0.1142 0.140 Uiso 1 1 calc R U . . .
C61 C 0.5878(6) 0.3891(6) 0.1776(4) 0.096(3) Uani 1 1 d . . . . .
H61A H 0.5687 0.3488 0.2087 0.143 Uiso 1 1 calc R U . . .
H61B H 0.6655 0.3621 0.1682 0.143 Uiso 1 1 calc R U . . .
H61C H 0.5558 0.3856 0.1466 0.143 Uiso 1 1 calc R U . . .
C62 C 0.5980(5) 0.4983(8) 0.2398(3) 0.092(3) Uani 1 1 d . . . . .
H62A H 0.5790 0.4565 0.2700 0.139 Uiso 1 1 calc R U . . .
H62B H 0.5731 0.5678 0.2507 0.139 Uiso 1 1 calc R U . . .
H62C H 0.6756 0.4704 0.2297 0.139 Uiso 1 1 calc R U . . .
N11 N -0.1440(3) 1.0294(3) 0.24874(16) 0.0371(8) Uani 1 1 d . . . . .
N12 N -0.2365(3) 1.0749(3) 0.24439(18) 0.0438(9) Uani 1 1 d . . . . .
N13 N -0.3249(4) 1.1216(4) 0.2405(3) 0.0788(18) Uani 1 1 d . . . . .
N21 N 0.1669(3) 0.1827(3) 0.39304(15) 0.0375(8) Uani 1 1 d . . . . .
N22 N 0.1828(3) 0.1519(3) 0.43832(16) 0.0405(8) Uani 1 1 d . . . . .
N23 N 0.1964(5) 0.1201(5) 0.4821(2) 0.0696(15) Uani 1 1 d . . . . .
N71 N 0.3703(7) 0.9518(9) 0.1510(4) 0.126(3) Uani 1 1 d D . . . .
C71 C 0.3891(6) 0.8853(8) 0.1227(3) 0.089(3) Uani 1 1 d D . . . .
C72 C 0.4067(7) 0.8051(7) 0.0877(4) 0.102(3) Uani 1 1 d D . . . .
H72A H 0.4072 0.7445 0.1100 0.153 Uiso 1 1 calc R U . . .
H72B H 0.4752 0.7888 0.0643 0.153 Uiso 1 1 calc R U . . .
H72C H 0.3493 0.8281 0.0652 0.153 Uiso 1 1 calc R U . . .
N72 N 0.1326(14) 0.0927(8) 0.0080(4) 0.232(10) Uani 1 1 d D . . . .
C73 C 0.0866(10) 0.1645(8) -0.0188(3) 0.118(5) Uani 1 1 d D . . . .
C74 C 0.0337(12) 0.2571(10) -0.0507(4) 0.145(5) Uani 1 1 d D . . . .
H74A H -0.0123 0.3111 -0.0264 0.217 Uiso 1 1 calc R U . . .
H74B H -0.0095 0.2452 -0.0737 0.217 Uiso 1 1 calc R U . . .
H74C H 0.0874 0.2774 -0.0735 0.217 Uiso 1 1 calc R U . . .
N73A N 0.546(2) 0.882(2) -0.0119(11) 0.208(11) Uiso 0.59 1 d D . P B 1
C75A C 0.593(3) 0.867(3) -0.0580(11) 0.212(15) Uiso 0.59 1 d D . P B 1
C76A C 0.608(2) 0.8302(18) -0.1132(9) 0.145(8) Uiso 0.59 1 d D . P B 1
N73B N 0.677(3) 0.800(3) -0.0008(16) 0.207(15) Uiso 0.41 1 d D . P C 2
C75B C 0.653(5) 0.875(4) -0.033(2) 0.25(3) Uiso 0.41 1 d D . P C 2
C76B C 0.678(5) 0.927(4) -0.084(2) 0.28(3) Uiso 0.41 1 d D . P C 2
 
loop_
 _atom_site_aniso_label
 _atom_site_aniso_U_11
 _atom_site_aniso_U_22
 _atom_site_aniso_U_33
 _atom_site_aniso_U_23
 _atom_site_aniso_U_13
 _atom_site_aniso_U_12
Dy1 0.02479(9) 0.02197(8) 0.02630(9) -0.00114(6) -0.00340(6) -0.01007(6)
Dy2 0.02507(9) 0.02165(8) 0.02872(9) -0.00062(6) -0.00502(6) -0.00996(6)
Fe1 0.0262(3) 0.0227(2) 0.0283(2) -0.00181(18) -0.0042(2) -0.01090(19)
Fe2 0.0265(3) 0.0221(2) 0.0322(3) -0.00103(19) -0.0054(2) -0.00962(19)
Fe3 0.0242(2) 0.0227(2) 0.0272(2) -0.00117(18) -0.00389(19) -0.01039(19)
Fe4 0.0273(3) 0.0229(2) 0.0310(3) 0.00118(19) -0.0058(2) -0.0113(2)
O1 0.0241(12) 0.0254(12) 0.0294(12) -0.0024(9) -0.0014(10) -0.0103(10)
O2 0.0288(13) 0.0251(12) 0.0275(12) -0.0019(9) -0.0014(10) -0.0138(10)
N1 0.0328(17) 0.0266(15) 0.0283(15) -0.0026(11) -0.0032(13) -0.0138(13)
C1 0.0294(19) 0.0349(19) 0.0362(19) -0.0059(15) 0.0003(15) -0.0143(16)
C2 0.0311(19) 0.0344(19) 0.0310(18) -0.0068(14) 0.0001(15) -0.0167(16)
O3 0.0229(12) 0.0252(12) 0.0316(13) -0.0001(10) -0.0042(10) -0.0105(10)
C3 0.045(2) 0.0299(18) 0.0287(18) -0.0037(14) -0.0029(16) -0.0141(17)
C4 0.040(2) 0.0278(18) 0.0310(18) -0.0010(14) 0.0002(16) -0.0130(16)
O4 0.0307(13) 0.0247(12) 0.0271(12) -0.0024(9) -0.0023(10) -0.0110(10)
C5 0.0313(19) 0.0255(17) 0.0372(19) -0.0064(14) -0.0017(15) -0.0111(15)
C6 0.040(2) 0.0309(19) 0.0347(19) -0.0070(15) -0.0020(17) -0.0150(17)
C7 0.052(3) 0.0303(19) 0.038(2) -0.0054(16) -0.0087(19) -0.0169(18)
C8 0.074(4) 0.029(2) 0.037(2) -0.0072(16) -0.010(2) -0.013(2)
N2 0.0348(18) 0.0260(15) 0.0382(17) 0.0030(13) -0.0059(14) -0.0133(13)
C9 0.041(2) 0.033(2) 0.049(2) 0.0048(17) -0.0118(19) -0.0223(18)
C10 0.034(2) 0.034(2) 0.050(2) 0.0064(17) -0.0103(18) -0.0230(17)
O5 0.0278(13) 0.0262(12) 0.0359(14) 0.0016(10) -0.0062(11) -0.0136(10)
C11 0.042(2) 0.033(2) 0.040(2) 0.0014(16) 0.0033(18) -0.0188(18)
C12 0.037(2) 0.035(2) 0.043(2) -0.0001(17) 0.0055(18) -0.0151(17)
O6 0.0292(13) 0.0260(12) 0.0304(13) 0.0009(10) -0.0005(10) -0.0106(10)
C13 0.047(2) 0.0245(18) 0.044(2) 0.0039(16) -0.0111(19) -0.0167(17)
C14 0.058(3) 0.033(2) 0.059(3) 0.006(2) -0.025(2) -0.018(2)
C15 0.068(4) 0.037(2) 0.079(4) 0.007(2) -0.035(3) -0.015(2)
C16 0.078(4) 0.053(3) 0.086(4) 0.016(3) -0.046(4) -0.023(3)
N3 0.0261(15) 0.0245(14) 0.0341(16) -0.0018(12) -0.0043(12) -0.0121(12)
C17 0.0291(18) 0.0352(19) 0.0289(17) 0.0000(14) -0.0023(14) -0.0141(15)
C18 0.0308(19) 0.037(2) 0.0282(17) -0.0056(14) -0.0005(15) -0.0140(16)
O7 0.0248(12) 0.0256(12) 0.0278(12) -0.0016(9) -0.0037(10) -0.0105(10)
C19 0.0261(18) 0.0257(17) 0.039(2) -0.0018(14) 0.0003(15) -0.0091(14)
C20 0.0243(17) 0.0245(16) 0.040(2) -0.0004(14) -0.0072(15) -0.0085(14)
O8 0.0263(13) 0.0241(12) 0.0304(12) -0.0013(9) -0.0019(10) -0.0115(10)
C21 0.0325(19) 0.0309(18) 0.0345(19) 0.0000(14) -0.0046(15) -0.0166(15)
C22 0.036(2) 0.038(2) 0.039(2) 0.0012(16) -0.0049(17) -0.0230(17)
C23 0.055(3) 0.050(3) 0.054(3) 0.005(2) -0.010(2) -0.038(2)
C24 0.070(4) 0.082(4) 0.068(4) 0.013(3) -0.015(3) -0.060(4)
N4 0.0333(17) 0.0253(15) 0.0455(19) -0.0005(13) -0.0084(15) -0.0116(13)
C25 0.041(2) 0.0269(18) 0.052(2) -0.0089(17) -0.0145(19) -0.0084(17)
C26 0.043(2) 0.0275(19) 0.046(2) -0.0110(16) -0.0155(19) -0.0065(17)
O9 0.0310(14) 0.0232(12) 0.0335(13) -0.0027(10) -0.0078(11) -0.0095(10)
C27 0.038(2) 0.0286(19) 0.049(2) -0.0045(17) 0.0019(19) -0.0109(17)
C28 0.029(2) 0.0302(19) 0.058(3) -0.0017(18) 0.0011(19) -0.0096(16)
O10 0.0277(13) 0.0240(12) 0.0343(13) -0.0013(10) -0.0026(11) -0.0108(10)
C29 0.035(2) 0.0229(17) 0.059(3) 0.0006(17) -0.0137(19) -0.0092(16)
C30 0.037(2) 0.0284(19) 0.063(3) 0.0039(18) -0.016(2) -0.0104(17)
C31 0.050(3) 0.043(3) 0.064(3) 0.011(2) -0.023(2) -0.017(2)
C32 0.044(3) 0.051(3) 0.069(3) 0.005(3) -0.020(3) -0.010(2)
O11 0.0306(14) 0.0272(13) 0.0404(14) -0.0022(11) -0.0096(11) -0.0144(11)
O12 0.0343(15) 0.0297(13) 0.0427(15) -0.0019(11) -0.0085(12) -0.0151(12)
C33 0.0307(19) 0.0302(18) 0.0341(19) -0.0018(14) -0.0052(15) -0.0133(15)
C34 0.031(2) 0.037(2) 0.047(2) -0.0094(17) -0.0065(17) -0.0147(17)
C35 0.048(3) 0.050(3) 0.063(3) 0.002(2) -0.026(2) -0.023(2)
C36 0.050(3) 0.102(5) 0.077(4) -0.051(4) -0.014(3) -0.021(3)
C37 0.050(3) 0.050(3) 0.090(4) 0.011(3) -0.017(3) -0.032(2)
O13 0.0355(14) 0.0271(12) 0.0296(13) -0.0028(10) -0.0071(11) -0.0153(11)
O14 0.0347(14) 0.0309(13) 0.0297(13) -0.0018(10) -0.0060(11) -0.0158(11)
C38 0.0284(18) 0.0291(17) 0.0289(17) -0.0027(13) -0.0025(14) -0.0118(14)
C39 0.046(2) 0.037(2) 0.0333(19) -0.0038(16) -0.0089(17) -0.0201(18)
C40 0.059(3) 0.058(3) 0.066(3) -0.003(3) -0.022(3) -0.036(3)
C41 0.130(6) 0.066(4) 0.048(3) 0.014(3) -0.044(4) -0.058(4)
C42 0.064(4) 0.067(4) 0.063(3) -0.035(3) -0.002(3) -0.017(3)
O15 0.0323(14) 0.0247(13) 0.0462(16) -0.0022(11) -0.0106(12) -0.0087(11)
O16 0.0284(14) 0.0259(13) 0.0424(15) 0.0001(11) -0.0101(11) -0.0086(11)
C43 0.033(2) 0.0280(18) 0.040(2) 0.0007(15) -0.0082(16) -0.0143(15)
C44 0.036(2) 0.031(2) 0.070(3) 0.003(2) -0.021(2) -0.0131(17)
C45 0.044(3) 0.061(3) 0.075(4) 0.020(3) -0.032(3) -0.021(2)
C46 0.031(3) 0.130(7) 0.093(5) 0.040(5) -0.009(3) -0.029(4)
C47 0.081(5) 0.048(4) 0.284(14) -0.042(6) -0.112(8) -0.005(3)
O17 0.0408(16) 0.0304(13) 0.0332(14) 0.0030(11) -0.0110(12) -0.0178(12)
O18 0.0410(16) 0.0285(13) 0.0328(13) 0.0016(10) -0.0089(12) -0.0159(12)
C48 0.033(2) 0.0294(18) 0.0311(18) -0.0022(14) -0.0053(15) -0.0115(15)
C49 0.049(3) 0.040(2) 0.032(2) -0.0010(16) -0.0127(18) -0.0168(19)
C50 0.098(5) 0.105(5) 0.038(3) -0.017(3) 0.012(3) -0.060(5)
C51 0.068(4) 0.075(4) 0.063(4) -0.013(3) -0.034(3) 0.002(3)
C52 0.126(6) 0.064(4) 0.052(3) 0.008(3) -0.038(4) -0.056(4)
O19 0.0313(14) 0.0351(14) 0.0305(13) -0.0038(11) 0.0034(11) -0.0124(12)
O20 0.0451(18) 0.0331(15) 0.0448(17) -0.0067(13) 0.0051(14) -0.0081(13)
C53 0.037(2) 0.038(2) 0.037(2) -0.0085(16) -0.0004(17) -0.0163(17)
O21 0.0279(14) 0.0294(13) 0.0396(15) 0.0004(11) 0.0011(11) -0.0120(11)
O22 0.0301(15) 0.0396(16) 0.0533(19) 0.0127(14) -0.0008(13) -0.0114(13)
C58 0.033(2) 0.0308(19) 0.038(2) -0.0001(15) -0.0036(16) -0.0131(16)
C59 0.027(2) 0.041(2) 0.049(2) -0.0014(18) 0.0018(17) -0.0128(17)
C60 0.042(3) 0.103(6) 0.107(6) 0.051(5) 0.007(3) -0.022(3)
C61 0.053(4) 0.071(4) 0.157(8) -0.056(5) 0.043(5) -0.028(3)
C62 0.042(3) 0.155(8) 0.075(4) -0.032(5) -0.008(3) -0.028(4)
N11 0.0336(18) 0.0257(16) 0.047(2) -0.0088(14) -0.0049(15) -0.0060(14)
N12 0.034(2) 0.0332(18) 0.062(2) -0.0143(16) -0.0028(17) -0.0089(15)
N13 0.039(3) 0.063(3) 0.129(5) -0.041(3) -0.016(3) -0.004(2)
N21 0.043(2) 0.0338(17) 0.0416(19) 0.0083(14) -0.0099(16) -0.0224(16)
N22 0.040(2) 0.0415(19) 0.043(2) 0.0079(16) -0.0040(16) -0.0225(16)
N23 0.080(4) 0.092(4) 0.051(3) 0.026(3) -0.017(3) -0.054(3)
N71 0.087(5) 0.196(10) 0.123(7) -0.053(7) 0.012(5) -0.084(6)
C71 0.050(4) 0.138(8) 0.079(5) -0.012(5) -0.006(3) -0.037(5)
C72 0.075(5) 0.087(6) 0.146(9) -0.019(6) -0.032(5) -0.024(4)
N72 0.43(3) 0.089(7) 0.117(8) -0.024(6) 0.106(12) -0.097(11)
C73 0.191(11) 0.128(8) 0.072(5) -0.060(5) 0.062(6) -0.119(9)
C74 0.193(14) 0.157(11) 0.065(5) -0.010(6) -0.026(7) -0.046(10)
 
_geom_special_details
;
 All esds (except the esd in the dihedral angle between two l.s. planes)
 are estimated using the full covariance matrix.  The cell esds are taken
 into account individually in the estimation of esds in distances, angles
 and torsion angles; correlations between esds in cell parameters are only
 used when they are defined by crystal symmetry.  An approximate (isotropic)
 treatment of cell esds is used for estimating esds involving l.s. planes.
;
 
loop_
 _geom_bond_atom_site_label_1
 _geom_bond_atom_site_label_2
 _geom_bond_distance
 _geom_bond_site_symmetry_2
 _geom_bond_publ_flag
Dy1 O19 2.287(3) . ?
Dy1 O6 2.330(3) . ?
Dy1 O8 2.333(2) . ?
Dy1 O16 2.349(3) . ?
Dy1 O1 2.375(3) . ?
Dy1 O14 2.378(3) . ?
Dy1 O2 2.404(3) . ?
Dy1 O3 2.564(3) . ?
Dy2 O21 2.271(3) . ?
Dy2 O10 2.300(3) . ?
Dy2 O4 2.328(3) . ?
Dy2 O18 2.344(3) . ?
Dy2 O2 2.358(3) . ?
Dy2 O12 2.395(3) . ?
Dy2 O1 2.432(3) . ?
Dy2 O7 2.690(3) . ?
Fe1 O1 1.946(3) . ?
Fe1 O5 1.971(3) . ?
Fe1 O11 1.973(3) . ?
Fe1 O4 1.997(3) . ?
Fe1 O3 2.091(3) . ?
Fe1 N1 2.191(3) . ?
Fe2 O6 1.984(3) . ?
Fe2 O15 1.996(3) . ?
Fe2 N11 2.010(3) . ?
Fe2 O5 2.021(3) . ?
Fe2 O3 2.067(3) . ?
Fe2 N2 2.210(3) . ?
Fe3 O2 1.947(3) . ?
Fe3 O13 1.970(3) . ?
Fe3 O9 1.989(3) . ?
Fe3 O8 1.995(3) . ?
Fe3 O7 2.069(3) . ?
Fe3 N3 2.244(3) . ?
Fe4 O10 1.951(3) . ?
Fe4 N21 2.009(3) . ?
Fe4 O9 2.024(3) . ?
Fe4 O17 2.032(3) . ?
Fe4 O7 2.069(3) . ?
Fe4 N4 2.216(4) . ?
O1 H1 0.87(3) . ?
O2 H2 0.92(3) . ?
N1 C3 1.489(5) . ?
N1 C5 1.489(5) . ?
N1 C1 1.493(5) . ?
C1 C2 1.528(5) . ?
C1 H1A 0.9900 . ?
C1 H1B 0.9900 . ?
C2 O3 1.437(4) . ?
C2 H2A 0.9900 . ?
C2 H2B 0.9900 . ?
C3 C4 1.516(5) . ?
C3 H3A 0.9900 . ?
C3 H3B 0.9900 . ?
C4 O4 1.411(5) . ?
C4 H4A 0.9900 . ?
C4 H4B 0.9900 . ?
C5 C6 1.528(5) . ?
C5 H5A 0.9900 . ?
C5 H5B 0.9900 . ?
C6 C7 1.531(6) . ?
C6 H6A 0.9900 . ?
C6 H6B 0.9900 . ?
C7 C8 1.512(6) . ?
C7 H7A 0.9900 . ?
C7 H7B 0.9900 . ?
C8 H8A 0.9800 . ?
C8 H8B 0.9800 . ?
C8 H8C 0.9800 . ?
N2 C9 1.491(6) . ?
N2 C13 1.492(5) . ?
N2 C11 1.500(5) . ?
C9 C10 1.535(6) . ?
C9 H9A 0.9900 . ?
C9 H9B 0.9900 . ?
C10 O5 1.417(4) . ?
C10 H10A 0.9900 . ?
C10 H10B 0.9900 . ?
C11 C12 1.523(6) . ?
C11 H11A 0.9900 . ?
C11 H11B 0.9900 . ?
C12 O6 1.423(5) . ?
C12 H12A 0.9900 . ?
C12 H12B 0.9900 . ?
C13 C14 1.514(7) . ?
C13 H13A 0.9900 . ?
C13 H13B 0.9900 . ?
C14 C15 1.510(7) . ?
C14 H14A 0.9900 . ?
C14 H14B 0.9900 . ?
C15 C16 1.494(9) . ?
C15 H15A 0.9900 . ?
C15 H15B 0.9900 . ?
C16 H16A 0.9800 . ?
C16 H16B 0.9800 . ?
C16 H16C 0.9800 . ?
N3 C17 1.482(5) . ?
N3 C21 1.488(5) . ?
N3 C19 1.498(5) . ?
C17 C18 1.537(6) . ?
C17 H17A 0.9900 . ?
C17 H17B 0.9900 . ?
C18 O7 1.429(4) . ?
C18 H18A 0.9900 . ?
C18 H18B 0.9900 . ?
C19 C20 1.519(5) . ?
C19 H19A 0.9900 . ?
C19 H19B 0.9900 . ?
C20 O8 1.409(5) . ?
C20 H20A 0.9900 . ?
C20 H20B 0.9900 . ?
C21 C22 1.519(5) . ?
C21 H21A 0.9900 . ?
C21 H21B 0.9900 . ?
C22 C23 1.531(6) . ?
C22 H22A 0.9900 . ?
C22 H22B 0.9900 . ?
C23 C24 1.520(7) . ?
C23 H23A 0.9900 . ?
C23 H23B 0.9900 . ?
C24 H24A 0.9800 . ?
C24 H24B 0.9800 . ?
C24 H24C 0.9800 . ?
N4 C25 1.487(6) . ?
N4 C27 1.496(6) . ?
N4 C29 1.497(5) . ?
C25 C26 1.523(6) . ?
C25 H25A 0.9900 . ?
C25 H25B 0.9900 . ?
C26 O9 1.417(5) . ?
C26 H26A 0.9900 . ?
C26 H26B 0.9900 . ?
C27 C28 1.516(6) . ?
C27 H27A 0.9900 . ?
C27 H27B 0.9900 . ?
C28 O10 1.410(5) . ?
C28 H28A 0.9900 . ?
C28 H28B 0.9900 . ?
C29 C30 1.513(6) . ?
C29 H29A 0.9900 . ?
C29 H29B 0.9900 . ?
C30 C31 1.515(6) . ?
C30 H30A 0.9900 . ?
C30 H30B 0.9900 . ?
C31 C32 1.517(8) . ?
C31 H31A 0.9900 . ?
C31 H31B 0.9900 . ?
C32 H32A 0.9800 . ?
C32 H32B 0.9800 . ?
C32 H32C 0.9800 . ?
O11 C33 1.292(5) . ?
O12 C33 1.252(5) . ?
C33 C34 1.521(6) . ?
C34 C35 1.521(7) . ?
C34 C36 1.527(7) . ?
C34 C37 1.552(7) . ?
C35 H35A 0.9800 . ?
C35 H35B 0.9800 . ?
C35 H35C 0.9800 . ?
C36 H36A 0.9800 . ?
C36 H36B 0.9800 . ?
C36 H36C 0.9800 . ?
C37 H37A 0.9800 . ?
C37 H37B 0.9800 . ?
C37 H37C 0.9800 . ?
O13 C38 1.291(5) . ?
O14 C38 1.245(5) . ?
C38 C39 1.523(5) . ?
C39 C41 1.508(7) . ?
C39 C40 1.521(7) . ?
C39 C42 1.540(7) . ?
C40 H40A 0.9800 . ?
C40 H40B 0.9800 . ?
C40 H40C 0.9800 . ?
C41 H41A 0.9800 . ?
C41 H41B 0.9800 . ?
C41 H41C 0.9800 . ?
C42 H42A 0.9800 . ?
C42 H42B 0.9800 . ?
C42 H42C 0.9800 . ?
O15 C43 1.276(5) . ?
O16 C43 1.261(5) . ?
C43 C44 1.533(6) . ?
C44 C47 1.504(8) . ?
C44 C46 1.524(9) . ?
C44 C45 1.524(7) . ?
C45 H45A 0.9800 . ?
C45 H45B 0.9800 . ?
C45 H45C 0.9800 . ?
C46 H46A 0.9800 . ?
C46 H46B 0.9800 . ?
C46 H46C 0.9800 . ?
C47 H47A 0.9800 . ?
C47 H47B 0.9800 . ?
C47 H47C 0.9800 . ?
O17 C48 1.275(5) . ?
O18 C48 1.253(5) . ?
C48 C49 1.534(6) . ?
C49 C52 1.505(7) . ?
C49 C51 1.520(8) . ?
C49 C50 1.543(8) . ?
C50 H50A 0.9800 . ?
C50 H50B 0.9800 . ?
C50 H50C 0.9800 . ?
C51 H51A 0.9800 . ?
C51 H51B 0.9800 . ?
C51 H51C 0.9800 . ?
C52 H52A 0.9800 . ?
C52 H52B 0.9800 . ?
C52 H52C 0.9800 . ?
O19 C53 1.284(5) . ?
O20 C53 1.245(5) . ?
C53 C54 1.537(6) . ?
C54 C56B 1.479(11) . ?
C54 C55A 1.486(10) . ?
C54 C57A 1.530(10) . ?
C54 C55B 1.561(9) . ?
C54 C57B 1.573(11) . ?
C54 C56A 1.585(10) . ?
C55A H55A 0.9800 . ?
C55A H55B 0.9800 . ?
C55A H55C 0.9800 . ?
C56A H56A 0.9800 . ?
C56A H56B 0.9800 . ?
C56A H56C 0.9800 . ?
C57A H57A 0.9800 . ?
C57A H57B 0.9800 . ?
C57A H57C 0.9800 . ?
C55B H55D 0.9800 . ?
C55B H55E 0.9800 . ?
C55B H55F 0.9800 . ?
C56B H56D 0.9800 . ?
C56B H56E 0.9800 . ?
C56B H56F 0.9800 . ?
C57B H57D 0.9800 . ?
C57B H57E 0.9800 . ?
C57B H57F 0.9800 . ?
O21 C58 1.278(5) . ?
O22 C58 1.254(5) . ?
C58 C59 1.542(6) . ?
C59 C62 1.499(9) . ?
C59 C61 1.516(8) . ?
C59 C60 1.529(7) . ?
C60 H60A 0.9800 . ?
C60 H60B 0.9800 . ?
C60 H60C 0.9800 . ?
C61 H61A 0.9800 . ?
C61 H61B 0.9800 . ?
C61 H61C 0.9800 . ?
C62 H62A 0.9800 . ?
C62 H62B 0.9800 . ?
C62 H62C 0.9800 . ?
N11 N12 1.197(5) . ?
N12 N13 1.150(6) . ?
N21 N22 1.194(5) . ?
N22 N23 1.157(6) . ?
N71 C71 1.183(11) . ?
C71 C72 1.462(12) . ?
C72 H72A 0.9800 . ?
C72 H72B 0.9800 . ?
C72 H72C 0.9800 . ?
N72 C73 1.173(14) . ?
C73 C74 1.454(13) . ?
C74 H74A 0.9800 . ?
C74 H74B 0.9800 . ?
C74 H74C 0.9800 . ?
N73A C75A 1.220(18) . ?
C75A C76A 1.496(18) . ?
N73B C75B 1.230(19) . ?
C75B C76B 1.482(19) . ?
 
loop_
 _geom_angle_atom_site_label_1
 _geom_angle_atom_site_label_2
 _geom_angle_atom_site_label_3
 _geom_angle
 _geom_angle_site_symmetry_1
 _geom_angle_site_symmetry_3
 _geom_angle_publ_flag
O19 Dy1 O6 79.36(10) . . ?
O19 Dy1 O8 137.72(10) . . ?
O6 Dy1 O8 142.42(9) . . ?
O19 Dy1 O16 119.92(10) . . ?
O6 Dy1 O16 74.98(10) . . ?
O8 Dy1 O16 78.64(9) . . ?
O19 Dy1 O1 84.08(10) . . ?
O6 Dy1 O1 80.78(9) . . ?
O8 Dy1 O1 104.77(9) . . ?
O16 Dy1 O1 141.00(9) . . ?
O19 Dy1 O14 74.05(10) . . ?
O6 Dy1 O14 120.35(9) . . ?
O8 Dy1 O14 76.13(9) . . ?
O16 Dy1 O14 74.06(10) . . ?
O1 Dy1 O14 144.91(9) . . ?
O19 Dy1 O2 79.28(9) . . ?
O6 Dy1 O2 144.61(9) . . ?
O8 Dy1 O2 66.43(9) . . ?
O16 Dy1 O2 140.41(9) . . ?
O1 Dy1 O2 69.23(9) . . ?
O14 Dy1 O2 79.81(9) . . ?
O19 Dy1 O3 139.82(9) . . ?
O6 Dy1 O3 68.45(9) . . ?
O8 Dy1 O3 79.19(8) . . ?
O16 Dy1 O3 74.84(9) . . ?
O1 Dy1 O3 67.97(8) . . ?
O14 Dy1 O3 143.36(9) . . ?
O2 Dy1 O3 114.15(8) . . ?
O21 Dy2 O10 78.64(10) . . ?
O21 Dy2 O4 136.92(9) . . ?
O10 Dy2 O4 144.44(9) . . ?
O21 Dy2 O18 119.06(11) . . ?
O10 Dy2 O18 77.38(10) . . ?
O4 Dy2 O18 82.42(9) . . ?
O21 Dy2 O2 89.56(10) . . ?
O10 Dy2 O2 77.74(9) . . ?
O4 Dy2 O2 98.49(9) . . ?
O18 Dy2 O2 136.80(9) . . ?
O21 Dy2 O12 74.41(11) . . ?
O10 Dy2 O12 124.22(10) . . ?
O4 Dy2 O12 76.77(10) . . ?
O18 Dy2 O12 74.78(10) . . ?
O2 Dy2 O12 147.83(9) . . ?
O21 Dy2 O1 78.12(9) . . ?
O10 Dy2 O1 139.19(9) . . ?
O4 Dy2 O1 65.93(9) . . ?
O18 Dy2 O1 143.43(9) . . ?
O2 Dy2 O1 69.03(9) . . ?
O12 Dy2 O1 80.31(9) . . ?
O21 Dy2 O7 140.35(9) . . ?
O10 Dy2 O7 66.53(9) . . ?
O4 Dy2 O7 79.59(8) . . ?
O18 Dy2 O7 72.15(9) . . ?
O2 Dy2 O7 65.69(8) . . ?
O12 Dy2 O7 141.37(9) . . ?
O1 Dy2 O7 116.71(8) . . ?
O1 Fe1 O5 101.37(11) . . ?
O1 Fe1 O11 101.63(12) . . ?
O5 Fe1 O11 93.19(11) . . ?
O1 Fe1 O4 82.19(11) . . ?
O5 Fe1 O4 167.79(12) . . ?
O11 Fe1 O4 97.54(11) . . ?
O1 Fe1 O3 86.38(11) . . ?
O5 Fe1 O3 76.58(11) . . ?
O11 Fe1 O3 168.18(11) . . ?
O4 Fe1 O3 92.11(11) . . ?
O1 Fe1 N1 158.53(12) . . ?
O5 Fe1 N1 93.39(12) . . ?
O11 Fe1 N1 92.93(12) . . ?
O4 Fe1 N1 80.31(11) . . ?
O3 Fe1 N1 81.95(11) . . ?
O6 Fe2 O15 89.32(12) . . ?
O6 Fe2 N11 167.59(14) . . ?
O15 Fe2 N11 86.45(14) . . ?
O6 Fe2 O5 93.69(12) . . ?
O15 Fe2 O5 166.81(12) . . ?
N11 Fe2 O5 93.07(14) . . ?
O6 Fe2 O3 85.85(10) . . ?
O15 Fe2 O3 91.37(11) . . ?
N11 Fe2 O3 105.90(13) . . ?
O5 Fe2 O3 76.08(10) . . ?
O6 Fe2 N2 81.49(12) . . ?
O15 Fe2 N2 113.47(13) . . ?
N11 Fe2 N2 89.50(14) . . ?
O5 Fe2 N2 79.69(12) . . ?
O3 Fe2 N2 151.79(12) . . ?
O2 Fe3 O13 100.28(11) . . ?
O2 Fe3 O9 103.17(11) . . ?
O13 Fe3 O9 88.74(11) . . ?
O2 Fe3 O8 82.36(11) . . ?
O13 Fe3 O8 94.38(11) . . ?
O9 Fe3 O8 173.09(11) . . ?
O2 Fe3 O7 86.47(11) . . ?
O13 Fe3 O7 164.51(11) . . ?
O9 Fe3 O7 76.10(10) . . ?
O8 Fe3 O7 100.36(11) . . ?
O2 Fe3 N3 156.37(11) . . ?
O13 Fe3 N3 96.39(12) . . ?
O9 Fe3 N3 93.78(11) . . ?
O8 Fe3 N3 79.77(11) . . ?
O7 Fe3 N3 81.71(11) . . ?
O10 Fe4 N21 164.02(14) . . ?
O10 Fe4 O9 98.69(11) . . ?
N21 Fe4 O9 91.53(13) . . ?
O10 Fe4 O17 88.58(12) . . ?
N21 Fe4 O17 84.94(14) . . ?
O9 Fe4 O17 163.25(12) . . ?
O10 Fe4 O7 86.51(11) . . ?
N21 Fe4 O7 108.05(13) . . ?
O9 Fe4 O7 75.34(10) . . ?
O17 Fe4 O7 90.17(11) . . ?
O10 Fe4 N4 81.00(12) . . ?
N21 Fe4 N4 88.85(15) . . ?
O9 Fe4 N4 79.69(12) . . ?
O17 Fe4 N4 116.52(13) . . ?
O7 Fe4 N4 149.98(12) . . ?
Fe1 O1 Dy1 108.19(11) . . ?
Fe1 O1 Dy2 100.58(11) . . ?
Dy1 O1 Dy2 107.28(10) . . ?
Fe1 O1 H1 110(3) . . ?
Dy1 O1 H1 123(3) . . ?
Dy2 O1 H1 105(3) . . ?
Fe3 O2 Dy2 111.38(11) . . ?
Fe3 O2 Dy1 101.75(11) . . ?
Dy2 O2 Dy1 108.77(10) . . ?
Fe3 O2 H2 111(3) . . ?
Dy2 O2 H2 120(3) . . ?
Dy1 O2 H2 102(3) . . ?
C3 N1 C5 110.5(3) . . ?
C3 N1 C1 114.0(3) . . ?
C5 N1 C1 111.0(3) . . ?
C3 N1 Fe1 102.6(2) . . ?
C5 N1 Fe1 110.9(2) . . ?
C1 N1 Fe1 107.6(2) . . ?
N1 C1 C2 112.8(3) . . ?
N1 C1 H1A 109.0 . . ?
C2 C1 H1A 109.0 . . ?
N1 C1 H1B 109.0 . . ?
C2 C1 H1B 109.0 . . ?
H1A C1 H1B 107.8 . . ?
O3 C2 C1 110.7(3) . . ?
O3 C2 H2A 109.5 . . ?
C1 C2 H2A 109.5 . . ?
O3 C2 H2B 109.5 . . ?
C1 C2 H2B 109.5 . . ?
H2A C2 H2B 108.1 . . ?
C2 O3 Fe2 122.3(2) . . ?
C2 O3 Fe1 108.8(2) . . ?
Fe2 O3 Fe1 100.23(11) . . ?
C2 O3 Dy1 126.3(2) . . ?
Fe2 O3 Dy1 96.59(10) . . ?
Fe1 O3 Dy1 97.31(10) . . ?
N1 C3 C4 110.0(3) . . ?
N1 C3 H3A 109.7 . . ?
C4 C3 H3A 109.7 . . ?
N1 C3 H3B 109.7 . . ?
C4 C3 H3B 109.7 . . ?
H3A C3 H3B 108.2 . . ?
O4 C4 C3 110.4(3) . . ?
O4 C4 H4A 109.6 . . ?
C3 C4 H4A 109.6 . . ?
O4 C4 H4B 109.6 . . ?
C3 C4 H4B 109.6 . . ?
H4A C4 H4B 108.1 . . ?
C4 O4 Fe1 117.2(2) . . ?
C4 O4 Dy2 135.4(2) . . ?
Fe1 O4 Dy2 102.63(11) . . ?
N1 C5 C6 115.9(3) . . ?
N1 C5 H5A 108.3 . . ?
C6 C5 H5A 108.3 . . ?
N1 C5 H5B 108.3 . . ?
C6 C5 H5B 108.3 . . ?
H5A C5 H5B 107.4 . . ?
C5 C6 C7 110.4(3) . . ?
C5 C6 H6A 109.6 . . ?
C7 C6 H6A 109.6 . . ?
C5 C6 H6B 109.6 . . ?
C7 C6 H6B 109.6 . . ?
H6A C6 H6B 108.1 . . ?
C8 C7 C6 112.2(4) . . ?
C8 C7 H7A 109.2 . . ?
C6 C7 H7A 109.2 . . ?
C8 C7 H7B 109.2 . . ?
C6 C7 H7B 109.2 . . ?
H7A C7 H7B 107.9 . . ?
C7 C8 H8A 109.5 . . ?
C7 C8 H8B 109.5 . . ?
H8A C8 H8B 109.5 . . ?
C7 C8 H8C 109.5 . . ?
H8A C8 H8C 109.5 . . ?
H8B C8 H8C 109.5 . . ?
C9 N2 C13 107.3(3) . . ?
C9 N2 C11 112.5(4) . . ?
C13 N2 C11 110.7(3) . . ?
C9 N2 Fe2 103.6(2) . . ?
C13 N2 Fe2 116.2(3) . . ?
C11 N2 Fe2 106.5(2) . . ?
N2 C9 C10 112.0(3) . . ?
N2 C9 H9A 109.2 . . ?
C10 C9 H9A 109.2 . . ?
N2 C9 H9B 109.2 . . ?
C10 C9 H9B 109.2 . . ?
H9A C9 H9B 107.9 . . ?
O5 C10 C9 107.3(3) . . ?
O5 C10 H10A 110.3 . . ?
C9 C10 H10A 110.3 . . ?
O5 C10 H10B 110.3 . . ?
C9 C10 H10B 110.3 . . ?
H10A C10 H10B 108.5 . . ?
C10 O5 Fe1 130.3(2) . . ?
C10 O5 Fe2 119.5(2) . . ?
Fe1 O5 Fe2 106.13(12) . . ?
N2 C11 C12 111.4(3) . . ?
N2 C11 H11A 109.4 . . ?
C12 C11 H11A 109.4 . . ?
N2 C11 H11B 109.4 . . ?
C12 C11 H11B 109.4 . . ?
H11A C11 H11B 108.0 . . ?
O6 C12 C11 109.1(3) . . ?
O6 C12 H12A 109.9 . . ?
C11 C12 H12A 109.9 . . ?
O6 C12 H12B 109.9 . . ?
C11 C12 H12B 109.9 . . ?
H12A C12 H12B 108.3 . . ?
C12 O6 Fe2 112.7(2) . . ?
C12 O6 Dy1 124.9(2) . . ?
Fe2 O6 Dy1 106.96(11) . . ?
N2 C13 C14 116.2(3) . . ?
N2 C13 H13A 108.2 . . ?
C14 C13 H13A 108.2 . . ?
N2 C13 H13B 108.2 . . ?
C14 C13 H13B 108.2 . . ?
H13A C13 H13B 107.4 . . ?
C15 C14 C13 112.0(4) . . ?
C15 C14 H14A 109.2 . . ?
C13 C14 H14A 109.2 . . ?
C15 C14 H14B 109.2 . . ?
C13 C14 H14B 109.2 . . ?
H14A C14 H14B 107.9 . . ?
C16 C15 C14 114.6(5) . . ?
C16 C15 H15A 108.6 . . ?
C14 C15 H15A 108.6 . . ?
C16 C15 H15B 108.6 . . ?
C14 C15 H15B 108.6 . . ?
H15A C15 H15B 107.6 . . ?
C15 C16 H16A 109.5 . . ?
C15 C16 H16B 109.5 . . ?
H16A C16 H16B 109.5 . . ?
C15 C16 H16C 109.5 . . ?
H16A C16 H16C 109.5 . . ?
H16B C16 H16C 109.5 . . ?
C17 N3 C21 111.9(3) . . ?
C17 N3 C19 112.0(3) . . ?
C21 N3 C19 112.1(3) . . ?
C17 N3 Fe3 104.5(2) . . ?
C21 N3 Fe3 109.5(2) . . ?
C19 N3 Fe3 106.4(2) . . ?
N3 C17 C18 109.7(3) . . ?
N3 C17 H17A 109.7 . . ?
C18 C17 H17A 109.7 . . ?
N3 C17 H17B 109.7 . . ?
C18 C17 H17B 109.7 . . ?
H17A C17 H17B 108.2 . . ?
O7 C18 C17 110.4(3) . . ?
O7 C18 H18A 109.6 . . ?
C17 C18 H18A 109.6 . . ?
O7 C18 H18B 109.6 . . ?
C17 C18 H18B 109.6 . . ?
H18A C18 H18B 108.1 . . ?
C18 O7 Fe4 116.2(2) . . ?
C18 O7 Fe3 111.4(2) . . ?
Fe4 O7 Fe3 100.34(11) . . ?
C18 O7 Dy2 133.1(2) . . ?
Fe4 O7 Dy2 93.96(9) . . ?
Fe3 O7 Dy2 96.07(9) . . ?
N3 C19 C20 109.5(3) . . ?
N3 C19 H19A 109.8 . . ?
C20 C19 H19A 109.8 . . ?
N3 C19 H19B 109.8 . . ?
C20 C19 H19B 109.8 . . ?
H19A C19 H19B 108.2 . . ?
O8 C20 C19 108.1(3) . . ?
O8 C20 H20A 110.1 . . ?
C19 C20 H20A 110.1 . . ?
O8 C20 H20B 110.1 . . ?
C19 C20 H20B 110.1 . . ?
H20A C20 H20B 108.4 . . ?
C20 O8 Fe3 111.6(2) . . ?
C20 O8 Dy1 130.8(2) . . ?
Fe3 O8 Dy1 102.74(11) . . ?
N3 C21 C22 116.5(3) . . ?
N3 C21 H21A 108.2 . . ?
C22 C21 H21A 108.2 . . ?
N3 C21 H21B 108.2 . . ?
C22 C21 H21B 108.2 . . ?
H21A C21 H21B 107.3 . . ?
C21 C22 C23 111.6(4) . . ?
C21 C22 H22A 109.3 . . ?
C23 C22 H22A 109.3 . . ?
C21 C22 H22B 109.3 . . ?
C23 C22 H22B 109.3 . . ?
H22A C22 H22B 108.0 . . ?
C24 C23 C22 111.6(5) . . ?
C24 C23 H23A 109.3 . . ?
C22 C23 H23A 109.3 . . ?
C24 C23 H23B 109.3 . . ?
C22 C23 H23B 109.3 . . ?
H23A C23 H23B 108.0 . . ?
C23 C24 H24A 109.5 . . ?
C23 C24 H24B 109.5 . . ?
H24A C24 H24B 109.5 . . ?
C23 C24 H24C 109.5 . . ?
H24A C24 H24C 109.5 . . ?
H24B C24 H24C 109.5 . . ?
C25 N4 C27 111.3(4) . . ?
C25 N4 C29 107.7(3) . . ?
C27 N4 C29 112.5(3) . . ?
C25 N4 Fe4 103.5(3) . . ?
C27 N4 Fe4 105.9(2) . . ?
C29 N4 Fe4 115.5(3) . . ?
N4 C25 C26 110.9(3) . . ?
N4 C25 H25A 109.5 . . ?
C26 C25 H25A 109.5 . . ?
N4 C25 H25B 109.5 . . ?
C26 C25 H25B 109.5 . . ?
H25A C25 H25B 108.0 . . ?
O9 C26 C25 108.4(3) . . ?
O9 C26 H26A 110.0 . . ?
C25 C26 H26A 110.0 . . ?
O9 C26 H26B 110.0 . . ?
C25 C26 H26B 110.0 . . ?
H26A C26 H26B 108.4 . . ?
C26 O9 Fe3 128.0(2) . . ?
C26 O9 Fe4 118.2(2) . . ?
Fe3 O9 Fe4 104.73(12) . . ?
N4 C27 C28 110.9(4) . . ?
N4 C27 H27A 109.4 . . ?
C28 C27 H27A 109.4 . . ?
N4 C27 H27B 109.4 . . ?
C28 C27 H27B 109.4 . . ?
H27A C27 H27B 108.0 . . ?
O10 C28 C27 109.1(4) . . ?
O10 C28 H28A 109.9 . . ?
C27 C28 H28A 109.9 . . ?
O10 C28 H28B 109.9 . . ?
C27 C28 H28B 109.9 . . ?
H28A C28 H28B 108.3 . . ?
C28 O10 Fe4 117.2(2) . . ?
C28 O10 Dy2 131.9(2) . . ?
Fe4 O10 Dy2 110.82(12) . . ?
N4 C29 C30 115.3(3) . . ?
N4 C29 H29A 108.5 . . ?
C30 C29 H29A 108.5 . . ?
N4 C29 H29B 108.5 . . ?
C30 C29 H29B 108.5 . . ?
H29A C29 H29B 107.5 . . ?
C29 C30 C31 111.8(4) . . ?
C29 C30 H30A 109.2 . . ?
C31 C30 H30A 109.2 . . ?
C29 C30 H30B 109.2 . . ?
C31 C30 H30B 109.2 . . ?
H30A C30 H30B 107.9 . . ?
C30 C31 C32 112.9(4) . . ?
C30 C31 H31A 109.0 . . ?
C32 C31 H31A 109.0 . . ?
C30 C31 H31B 109.0 . . ?
C32 C31 H31B 109.0 . . ?
H31A C31 H31B 107.8 . . ?
C31 C32 H32A 109.5 . . ?
C31 C32 H32B 109.5 . . ?
H32A C32 H32B 109.5 . . ?
C31 C32 H32C 109.5 . . ?
H32A C32 H32C 109.5 . . ?
H32B C32 H32C 109.5 . . ?
C33 O11 Fe1 125.7(2) . . ?
C33 O12 Dy2 139.1(3) . . ?
O12 C33 O11 124.0(4) . . ?
O12 C33 C34 120.6(4) . . ?
O11 C33 C34 115.4(3) . . ?
C35 C34 C33 111.6(4) . . ?
C35 C34 C36 110.6(5) . . ?
C33 C34 C36 109.0(4) . . ?
C35 C34 C37 109.6(4) . . ?
C33 C34 C37 106.7(4) . . ?
C36 C34 C37 109.1(5) . . ?
C34 C35 H35A 109.5 . . ?
C34 C35 H35B 109.5 . . ?
H35A C35 H35B 109.5 . . ?
C34 C35 H35C 109.5 . . ?
H35A C35 H35C 109.5 . . ?
H35B C35 H35C 109.5 . . ?
C34 C36 H36A 109.5 . . ?
C34 C36 H36B 109.5 . . ?
H36A C36 H36B 109.5 . . ?
C34 C36 H36C 109.5 . . ?
H36A C36 H36C 109.5 . . ?
H36B C36 H36C 109.5 . . ?
C34 C37 H37A 109.5 . . ?
C34 C37 H37B 109.5 . . ?
H37A C37 H37B 109.5 . . ?
C34 C37 H37C 109.5 . . ?
H37A C37 H37C 109.5 . . ?
H37B C37 H37C 109.5 . . ?
C38 O13 Fe3 126.3(2) . . ?
C38 O14 Dy1 138.1(2) . . ?
O14 C38 O13 124.7(4) . . ?
O14 C38 C39 120.5(3) . . ?
O13 C38 C39 114.7(3) . . ?
C41 C39 C40 110.1(5) . . ?
C41 C39 C38 110.6(4) . . ?
C40 C39 C38 108.9(4) . . ?
C41 C39 C42 112.0(5) . . ?
C40 C39 C42 108.8(4) . . ?
C38 C39 C42 106.4(4) . . ?
C39 C40 H40A 109.5 . . ?
C39 C40 H40B 109.5 . . ?
H40A C40 H40B 109.5 . . ?
C39 C40 H40C 109.5 . . ?
H40A C40 H40C 109.5 . . ?
H40B C40 H40C 109.5 . . ?
C39 C41 H41A 109.5 . . ?
C39 C41 H41B 109.5 . . ?
H41A C41 H41B 109.5 . . ?
C39 C41 H41C 109.5 . . ?
H41A C41 H41C 109.5 . . ?
H41B C41 H41C 109.5 . . ?
C39 C42 H42A 109.5 . . ?
C39 C42 H42B 109.5 . . ?
H42A C42 H42B 109.5 . . ?
C39 C42 H42C 109.5 . . ?
H42A C42 H42C 109.5 . . ?
H42B C42 H42C 109.5 . . ?
C43 O15 Fe2 129.6(3) . . ?
C43 O16 Dy1 138.2(3) . . ?
O16 C43 O15 124.2(4) . . ?
O16 C43 C44 119.2(4) . . ?
O15 C43 C44 116.5(4) . . ?
C47 C44 C46 110.7(7) . . ?
C47 C44 C45 111.2(6) . . ?
C46 C44 C45 108.0(5) . . ?
C47 C44 C43 110.8(4) . . ?
C46 C44 C43 105.9(4) . . ?
C45 C44 C43 110.1(4) . . ?
C44 C45 H45A 109.5 . . ?
C44 C45 H45B 109.5 . . ?
H45A C45 H45B 109.5 . . ?
C44 C45 H45C 109.5 . . ?
H45A C45 H45C 109.5 . . ?
H45B C45 H45C 109.5 . . ?
C44 C46 H46A 109.5 . . ?
C44 C46 H46B 109.5 . . ?
H46A C46 H46B 109.5 . . ?
C44 C46 H46C 109.5 . . ?
H46A C46 H46C 109.5 . . ?
H46B C46 H46C 109.5 . . ?
C44 C47 H47A 109.5 . . ?
C44 C47 H47B 109.5 . . ?
H47A C47 H47B 109.5 . . ?
C44 C47 H47C 109.5 . . ?
H47A C47 H47C 109.5 . . ?
H47B C47 H47C 109.5 . . ?
C48 O17 Fe4 129.5(3) . . ?
C48 O18 Dy2 137.3(3) . . ?
O18 C48 O17 125.2(4) . . ?
O18 C48 C49 119.0(4) . . ?
O17 C48 C49 115.8(3) . . ?
C52 C49 C51 113.7(5) . . ?
C52 C49 C48 111.3(4) . . ?
C51 C49 C48 108.6(4) . . ?
C52 C49 C50 108.2(5) . . ?
C51 C49 C50 108.0(5) . . ?
C48 C49 C50 106.7(4) . . ?
C49 C50 H50A 109.5 . . ?
C49 C50 H50B 109.5 . . ?
H50A C50 H50B 109.5 . . ?
C49 C50 H50C 109.5 . . ?
H50A C50 H50C 109.5 . . ?
H50B C50 H50C 109.5 . . ?
C49 C51 H51A 109.5 . . ?
C49 C51 H51B 109.5 . . ?
H51A C51 H51B 109.5 . . ?
C49 C51 H51C 109.5 . . ?
H51A C51 H51C 109.5 . . ?
H51B C51 H51C 109.5 . . ?
C49 C52 H52A 109.5 . . ?
C49 C52 H52B 109.5 . . ?
H52A C52 H52B 109.5 . . ?
C49 C52 H52C 109.5 . . ?
H52A C52 H52C 109.5 . . ?
H52B C52 H52C 109.5 . . ?
C53 O19 Dy1 133.7(3) . . ?
O20 C53 O19 124.6(4) . . ?
O20 C53 C54 118.6(4) . . ?
O19 C53 C54 116.8(4) . . ?
C55A C54 C57A 113.2(7) . . ?
C56B C54 C53 115.4(7) . . ?
C55A C54 C53 114.5(7) . . ?
C57A C54 C53 106.1(7) . . ?
C56B C54 C55B 112.1(7) . . ?
C53 C54 C55B 106.6(5) . . ?
C56B C54 C57B 110.8(8) . . ?
C53 C54 C57B 107.1(8) . . ?
C55B C54 C57B 104.1(7) . . ?
C55A C54 C56A 110.0(7) . . ?
C57A C54 C56A 105.8(7) . . ?
C53 C54 C56A 106.7(6) . . ?
C54 C55A H55A 109.5 . . ?
C54 C55A H55B 109.5 . . ?
H55A C55A H55B 109.5 . . ?
C54 C55A H55C 109.5 . . ?
H55A C55A H55C 109.5 . . ?
H55B C55A H55C 109.5 . . ?
C54 C56A H56A 109.5 . . ?
C54 C56A H56B 109.5 . . ?
H56A C56A H56B 109.5 . . ?
C54 C56A H56C 109.5 . . ?
H56A C56A H56C 109.5 . . ?
H56B C56A H56C 109.5 . . ?
C54 C57A H57A 109.5 . . ?
C54 C57A H57B 109.5 . . ?
H57A C57A H57B 109.5 . . ?
C54 C57A H57C 109.5 . . ?
H57A C57A H57C 109.5 . . ?
H57B C57A H57C 109.5 . . ?
C54 C55B H55D 109.5 . . ?
C54 C55B H55E 109.5 . . ?
H55D C55B H55E 109.5 . . ?
C54 C55B H55F 109.5 . . ?
H55D C55B H55F 109.5 . . ?
H55E C55B H55F 109.5 . . ?
C54 C56B H56D 109.5 . . ?
C54 C56B H56E 109.5 . . ?
H56D C56B H56E 109.5 . . ?
C54 C56B H56F 109.5 . . ?
H56D C56B H56F 109.5 . . ?
H56E C56B H56F 109.5 . . ?
C54 C57B H57D 109.5 . . ?
C54 C57B H57E 109.5 . . ?
H57D C57B H57E 109.5 . . ?
C54 C57B H57F 109.5 . . ?
H57D C57B H57F 109.5 . . ?
H57E C57B H57F 109.5 . . ?
C58 O21 Dy2 135.9(3) . . ?
O22 C58 O21 124.0(4) . . ?
O22 C58 C59 119.3(4) . . ?
O21 C58 C59 116.7(4) . . ?
C62 C59 C61 106.7(6) . . ?
C62 C59 C60 110.2(6) . . ?
C61 C59 C60 111.1(6) . . ?
C62 C59 C58 107.5(4) . . ?
C61 C59 C58 110.8(4) . . ?
C60 C59 C58 110.3(4) . . ?
C59 C60 H60A 109.5 . . ?
C59 C60 H60B 109.5 . . ?
H60A C60 H60B 109.5 . . ?
C59 C60 H60C 109.5 . . ?
H60A C60 H60C 109.5 . . ?
H60B C60 H60C 109.5 . . ?
C59 C61 H61A 109.5 . . ?
C59 C61 H61B 109.5 . . ?
H61A C61 H61B 109.5 . . ?
C59 C61 H61C 109.5 . . ?
H61A C61 H61C 109.5 . . ?
H61B C61 H61C 109.5 . . ?
C59 C62 H62A 109.5 . . ?
C59 C62 H62B 109.5 . . ?
H62A C62 H62B 109.5 . . ?
C59 C62 H62C 109.5 . . ?
H62A C62 H62C 109.5 . . ?
H62B C62 H62C 109.5 . . ?
N12 N11 Fe2 125.2(3) . . ?
N13 N12 N11 177.7(5) . . ?
N22 N21 Fe4 127.5(3) . . ?
N23 N22 N21 177.7(5) . . ?
N71 C71 C72 177.1(9) . . ?
C71 C72 H72A 109.5 . . ?
C71 C72 H72B 109.5 . . ?
H72A C72 H72B 109.5 . . ?
C71 C72 H72C 109.5 . . ?
H72A C72 H72C 109.5 . . ?
H72B C72 H72C 109.5 . . ?
N72 C73 C74 175.9(14) . . ?
C73 C74 H74A 109.5 . . ?
C73 C74 H74B 109.5 . . ?
H74A C74 H74B 109.5 . . ?
C73 C74 H74C 109.5 . . ?
H74A C74 H74C 109.5 . . ?
H74B C74 H74C 109.5 . . ?
N73A C75A C76A 152(4) . . ?
N73B C75B C76B 150(5) . . ?
 
loop_
 _geom_hbond_atom_site_label_D 
 _geom_hbond_atom_site_label_H 
 _geom_hbond_atom_site_label_A 
 _geom_hbond_distance_DH 
 _geom_hbond_distance_HA 
 _geom_hbond_distance_DA 
 _geom_hbond_angle_DHA 
 _geom_hbond_site_symmetry_A 
O1 H1 O22  0.87(3) 1.79(3) 2.625(4) 160(5) .
O2 H2 O20  0.92(3) 1.70(3) 2.599(4) 164(4) .
 
_refine_diff_density_max    0.807
_refine_diff_density_min   -2.709
_refine_diff_density_rms    0.167

_shelxl_version_number 2013-2

_shelx_res_file
;
TITL L618 in P-1
CELL 0.71073  13.9237  14.5196  25.1289  82.856  79.710  65.545
ZERR    2.00   0.0006   0.0007   0.0010   0.003   0.003   0.003
LATT  1
SFAC C H N O FE DY
UNIT 136 266 26 44 8 4
TEMP -123
SIZE 0.32 0.29 0.21
OMIT 2 9 1
OMIT 7 4 5
OMIT 0 -12 1
OMIT 0 -13 1
OMIT 9 1 7
OMIT 0 14 1
OMIT 10 0 5
OMIT 8 1 6
OMIT 3 10 2
OMIT 6 4 4
OMIT 4 9 4
OMIT 9 -1 2
OMIT -2 6 20
OMIT 8 -3 3
L.S. 8
ACTA 50.5
BOND $H
HTAB O1 O22
HTAB O2 O20
RTAB M..M DY1 DY2
RTAB M..M FE1 FE2
RTAB M..M DY1 FE1
RTAB M..M DY1 FE2
RTAB M..M DY1 FE3
RTAB M..M DY2 FE3
RTAB M..M DY2 FE4
RTAB M..M DY2 FE1
FMAP 2
PLAN 40

DFIX 0.92 0.04 O1 H1 O2 H2
SADI C54 C55A C54 C56A C54 C57A C54 C55B C54 C56B C54 C57B
SADI C55A C56A C56A C57A C57A C55A C55B C56B C56B C57B C57B C55B
WGHT    0.089200
FVAR       0.13001
DY1   6    0.046449    0.642441    0.201526    11.00000    0.02479    0.02197 =
         0.02630   -0.00114   -0.00340   -0.01007
DY2   6    0.243185    0.507206    0.305342    11.00000    0.02507    0.02165 =
         0.02872   -0.00062   -0.00502   -0.00996
FE1   5    0.105718    0.761505    0.296764    11.00000    0.02624    0.02266 =
         0.02833   -0.00181   -0.00417   -0.01090
FE2   5   -0.045590    0.902390    0.211367    11.00000    0.02648    0.02205 =
         0.03225   -0.00103   -0.00541   -0.00962
FE3   5    0.051114    0.427518    0.273389    11.00000    0.02415    0.02270 =
         0.02722   -0.00117   -0.00389   -0.01039
FE4   5    0.224943    0.274036    0.344429    11.00000    0.02734    0.02286 =
         0.03096    0.00118   -0.00577   -0.01127
O1    4    0.177643    0.657010    0.244672    11.00000    0.02411    0.02538 =
         0.02943   -0.00238   -0.00139   -0.01030
H1    2    0.234382    0.663205    0.226920    11.00000   -1.20000
O2    4    0.156466    0.480655    0.239929    11.00000    0.02884    0.02508 =
         0.02752   -0.00190   -0.00135   -0.01381
H2    2    0.195720    0.447434    0.209334    11.00000   -1.20000
N1    3   -0.007331    0.842538    0.364937    11.00000    0.03285    0.02663 =
         0.02831   -0.00263   -0.00321   -0.01376
C1    1   -0.116671    0.862376    0.354572    11.00000    0.02945    0.03492 =
         0.03624   -0.00586    0.00030   -0.01429
AFIX  23
H1A   2   -0.151227    0.933641    0.340804    11.00000   -1.20000
H1B   2   -0.159488    0.853319    0.389175    11.00000   -1.20000
AFIX   0
C2    1   -0.116465    0.792548    0.313776    11.00000    0.03107    0.03437 =
         0.03097   -0.00678    0.00011   -0.01669
AFIX  23
H2A   2   -0.103834    0.724565    0.331588    11.00000   -1.20000
H2B   2   -0.186911    0.819823    0.301053    11.00000   -1.20000
AFIX   0
O3    4   -0.035056    0.784058    0.268260    11.00000    0.02293    0.02524 =
         0.03157   -0.00010   -0.00422   -0.01052
C3    1    0.027808    0.770118    0.412014    11.00000    0.04517    0.02994 =
         0.02868   -0.00371   -0.00286   -0.01411
AFIX  23
H3A   2   -0.027439    0.791509    0.444069    11.00000   -1.20000
H3B   2    0.094392    0.770108    0.420740    11.00000   -1.20000
AFIX   0
C4    1    0.046614    0.664352    0.398882    11.00000    0.04037    0.02777 =
         0.03100   -0.00096    0.00024   -0.01295
AFIX  23
H4A   2    0.089275    0.614063    0.425070    11.00000   -1.20000
H4B   2   -0.022583    0.658494    0.402151    11.00000   -1.20000
AFIX   0
O4    4    0.100901    0.643752    0.345824    11.00000    0.03066    0.02468 =
         0.02713   -0.00236   -0.00228   -0.01100
C5    1    0.002432    0.938929    0.370918    11.00000    0.03129    0.02547 =
         0.03724   -0.00636   -0.00168   -0.01106
AFIX  23
H5A   2   -0.012734    0.981740    0.337028    11.00000   -1.20000
H5B   2    0.077245    0.922790    0.374959    11.00000   -1.20000
AFIX   0
C6    1   -0.070076    1.000964    0.418353    11.00000    0.04027    0.03094 =
         0.03469   -0.00701   -0.00200   -0.01505
AFIX  23
H6A   2   -0.063255    0.956840    0.452055    11.00000   -1.20000
H6B   2   -0.145183    1.028124    0.411804    11.00000   -1.20000
AFIX   0
C7    1   -0.039971    1.088633    0.425017    11.00000    0.05248    0.03026 =
         0.03843   -0.00545   -0.00869   -0.01693
AFIX  23
H7A   2    0.034625    1.060884    0.432447    11.00000   -1.20000
H7B   2   -0.044259    1.130928    0.390714    11.00000   -1.20000
AFIX   0
C8    1   -0.111957    1.154194    0.470482    11.00000    0.07402    0.02861 =
         0.03715   -0.00723   -0.00993   -0.01326
AFIX  33
H8A   2   -0.089867    1.209110    0.473311    11.00000   -1.50000
H8B   2   -0.106912    1.112934    0.504665    11.00000   -1.50000
H8C   2   -0.185736    1.183019    0.462929    11.00000   -1.50000
AFIX   0
N2    3    0.026838    0.991980    0.154039    11.00000    0.03484    0.02601 =
         0.03819    0.00300   -0.00590   -0.01326
C9    1    0.084137    1.023025    0.188320    11.00000    0.04134    0.03309 =
         0.04915    0.00478   -0.01180   -0.02232
AFIX  23
H9A   2    0.031996    1.079690    0.210141    11.00000   -1.20000
H9B   2    0.134586    1.047593    0.164639    11.00000   -1.20000
AFIX   0
C10   1    0.145636    0.935303    0.226363    11.00000    0.03409    0.03413 =
         0.04951    0.00641   -0.01032   -0.02303
AFIX  23
H10A  2    0.211527    0.887498    0.205937    11.00000   -1.20000
H10B  2    0.165586    0.961504    0.255324    11.00000   -1.20000
AFIX   0
O5    4    0.077697    0.885698    0.249088    11.00000    0.02784    0.02625 =
         0.03588    0.00157   -0.00616   -0.01364
C11   1    0.101292    0.921859    0.111603    11.00000    0.04200    0.03259 =
         0.04019    0.00137    0.00326   -0.01880
AFIX  23
H11A  2    0.165235    0.937261    0.100728    11.00000   -1.20000
H11B  2    0.065634    0.933053    0.079212    11.00000   -1.20000
AFIX   0
C12   1    0.135150    0.811442    0.132347    11.00000    0.03720    0.03540 =
         0.04275   -0.00012    0.00548   -0.01507
AFIX  23
H12A  2    0.168161    0.766763    0.101597    11.00000   -1.20000
H12B  2    0.188419    0.794469    0.157291    11.00000   -1.20000
AFIX   0
O6    4    0.044031    0.795964    0.159994    11.00000    0.02919    0.02597 =
         0.03038    0.00091   -0.00048   -0.01064
C13   1   -0.048808    1.086413    0.128545    11.00000    0.04682    0.02446 =
         0.04414    0.00395   -0.01111   -0.01666
AFIX  23
H13A  2   -0.006689    1.118318    0.103291    11.00000   -1.20000
H13B  2   -0.090331    1.134037    0.157344    11.00000   -1.20000
AFIX   0
C14   1   -0.126356    1.073770    0.097851    11.00000    0.05787    0.03271 =
         0.05935    0.00575   -0.02472   -0.01758
AFIX  23
H14A  2   -0.086139    1.031505    0.066731    11.00000   -1.20000
H14B  2   -0.165940    1.037964    0.121932    11.00000   -1.20000
AFIX   0
C15   1   -0.204647    1.174403    0.077436    11.00000    0.06820    0.03651 =
         0.07879    0.00729   -0.03545   -0.01467
AFIX  23
H15A  2   -0.245207    1.215673    0.108869    11.00000   -1.20000
H15B  2   -0.164256    1.210637    0.054447    11.00000   -1.20000
AFIX   0
C16   1   -0.281840    1.167012    0.045596    11.00000    0.07828    0.05305 =
         0.08629    0.01596   -0.04562   -0.02256
AFIX  33
H16A  2   -0.329695    1.235213    0.034026    11.00000   -1.50000
H16B  2   -0.323691    1.132799    0.068210    11.00000   -1.50000
H16C  2   -0.242782    1.128176    0.013663    11.00000   -1.50000
AFIX   0
N3    3   -0.091066    0.423689    0.330478    11.00000    0.02613    0.02450 =
         0.03414   -0.00177   -0.00432   -0.01211
C17   1   -0.052246    0.390156    0.383689    11.00000    0.02915    0.03516 =
         0.02893    0.00004   -0.00234   -0.01407
AFIX  23
H17A  2   -0.014144    0.315462    0.386118    11.00000   -1.20000
H17B  2   -0.113445    0.409676    0.413109    11.00000   -1.20000
AFIX   0
C18   1    0.023270    0.439535    0.390312    11.00000    0.03079    0.03657 =
         0.02816   -0.00559   -0.00054   -0.01395
AFIX  23
H18A  2   -0.017207    0.513644    0.392512    11.00000   -1.20000
H18B  2    0.054096    0.412456    0.424393    11.00000   -1.20000
AFIX   0
O7    4    0.107010    0.419406    0.345533    11.00000    0.02485    0.02563 =
         0.02778   -0.00162   -0.00370   -0.01052
C19   1   -0.174471    0.529846    0.330179    11.00000    0.02607    0.02569 =
         0.03912   -0.00178    0.00033   -0.00906
AFIX  23
H19A  2   -0.172048    0.564760    0.361024    11.00000   -1.20000
H19B  2   -0.245983    0.528643    0.334167    11.00000   -1.20000
AFIX   0
C20   1   -0.154720    0.586595    0.277275    11.00000    0.02429    0.02446 =
         0.04016   -0.00042   -0.00715   -0.00848
AFIX  23
H20A  2   -0.169858    0.559610    0.246916    11.00000   -1.20000
H20B  2   -0.202031    0.659490    0.279035    11.00000   -1.20000
AFIX   0
O8    4   -0.047240    0.573684    0.269034    11.00000    0.02631    0.02408 =
         0.03039   -0.00127   -0.00193   -0.01153
C21   1   -0.127208    0.351240    0.312137    11.00000    0.03249    0.03086 =
         0.03446   -0.00004   -0.00463   -0.01664
AFIX  23
H21A  2   -0.065637    0.285021    0.308191    11.00000   -1.20000
H21B  2   -0.148635    0.375740    0.275755    11.00000   -1.20000
AFIX   0
C22   1   -0.218808    0.334094    0.348353    11.00000    0.03585    0.03822 =
         0.03887    0.00116   -0.00490   -0.02301
AFIX  23
H22A  2   -0.282772    0.398716    0.350612    11.00000   -1.20000
H22B  2   -0.199815    0.311956    0.385337    11.00000   -1.20000
AFIX   0
C23   1   -0.244657    0.254043    0.326859    11.00000    0.05482    0.04963 =
         0.05440    0.00482   -0.01035   -0.03795
AFIX  23
H23A  2   -0.260494    0.274675    0.289266    11.00000   -1.20000
H23B  2   -0.181734    0.188605    0.326170    11.00000   -1.20000
AFIX   0
C24   1   -0.339435    0.240366    0.361724    11.00000    0.06971    0.08187 =
         0.06773    0.01251   -0.01526   -0.06038
AFIX  33
H24A  2   -0.353786    0.188737    0.346912    11.00000   -1.50000
H24B  2   -0.402169    0.304747    0.361921    11.00000   -1.50000
H24C  2   -0.323472    0.218793    0.398824    11.00000   -1.50000
AFIX   0
N4    3    0.337605    0.140718    0.298902    11.00000    0.03330    0.02525 =
         0.04549   -0.00047   -0.00840   -0.01162
C25   1    0.267070    0.111708    0.272887    11.00000    0.04062    0.02691 =
         0.05220   -0.00893   -0.01449   -0.00844
AFIX  23
H25A  2    0.231340    0.076640    0.300254    11.00000   -1.20000
H25B  2    0.310523    0.064137    0.244335    11.00000   -1.20000
AFIX   0
C26   1    0.183347    0.204635    0.247993    11.00000    0.04263    0.02747 =
         0.04590   -0.01097   -0.01550   -0.00652
AFIX  23
H26A  2    0.216500    0.229610    0.214410    11.00000   -1.20000
H26B  2    0.127087    0.186982    0.238713    11.00000   -1.20000
AFIX   0
O9    4    0.138539    0.280603    0.286195    11.00000    0.03100    0.02322 =
         0.03349   -0.00267   -0.00781   -0.00954
C27   1    0.406817    0.178221    0.257639    11.00000    0.03751    0.02864 =
         0.04851   -0.00453    0.00194   -0.01086
AFIX  23
H27A  2    0.374915    0.200012    0.223623    11.00000   -1.20000
H27B  2    0.477867    0.122492    0.249698    11.00000   -1.20000
AFIX   0
C28   1    0.419131    0.266393    0.277811    11.00000    0.02855    0.03016 =
         0.05817   -0.00172    0.00108   -0.00962
AFIX  23
H28A  2    0.469911    0.241140    0.304562    11.00000   -1.20000
H28B  2    0.447576    0.302075    0.247163    11.00000   -1.20000
AFIX   0
O10   4    0.318959    0.333659    0.302052    11.00000    0.02771    0.02404 =
         0.03430   -0.00134   -0.00256   -0.01075
C29   1    0.400763    0.050610    0.332627    11.00000    0.03468    0.02286 =
         0.05933    0.00060   -0.01374   -0.00918
AFIX  23
H29A  2    0.444503   -0.005365    0.308493    11.00000   -1.20000
H29B  2    0.350544    0.028413    0.358192    11.00000   -1.20000
AFIX   0
C30   1    0.473535    0.067664    0.364726    11.00000    0.03687    0.02842 =
         0.06261    0.00389   -0.01574   -0.01036
AFIX  23
H30A  2    0.431517    0.126617    0.387151    11.00000   -1.20000
H30B  2    0.528533    0.083546    0.339404    11.00000   -1.20000
AFIX   0
C31   1    0.527502   -0.024348    0.401098    11.00000    0.05002    0.04331 =
         0.06403    0.01105   -0.02316   -0.01693
AFIX  23
H31A  2    0.569097   -0.083209    0.378556    11.00000   -1.20000
H31B  2    0.472266   -0.040077    0.426297    11.00000   -1.20000
AFIX   0
C32   1    0.601165   -0.009258    0.433708    11.00000    0.04420    0.05131 =
         0.06897    0.00524   -0.02037   -0.00952
AFIX  33
H32A  2    0.633364   -0.070595    0.456644    11.00000   -1.50000
H32B  2    0.560305    0.048307    0.456540    11.00000   -1.50000
H32C  2    0.657402    0.004261    0.409000    11.00000   -1.50000
AFIX   0
O11   4    0.227477    0.770944    0.322025    11.00000    0.03062    0.02724 =
         0.04043   -0.00218   -0.00958   -0.01442
O12   4    0.327929    0.604407    0.332089    11.00000    0.03429    0.02971 =
         0.04268   -0.00193   -0.00852   -0.01505
C33   1    0.310552    0.695204    0.336088    11.00000    0.03065    0.03019 =
         0.03415   -0.00175   -0.00522   -0.01334
C34   1    0.388996    0.722789    0.358626    11.00000    0.03106    0.03668 =
         0.04727   -0.00944   -0.00646   -0.01472
C35   1    0.478489    0.629168    0.378936    11.00000    0.04785    0.05007 =
         0.06295    0.00194   -0.02550   -0.02307
AFIX  33
H35A  2    0.448663    0.594213    0.408759    11.00000   -1.50000
H35B  2    0.528952    0.649430    0.391789    11.00000   -1.50000
H35C  2    0.515518    0.583536    0.349347    11.00000   -1.50000
AFIX   0
C36   1    0.328927    0.794731    0.404166    11.00000    0.05029    0.10196 =
         0.07704   -0.05098   -0.01378   -0.02149
AFIX  33
H36A  2    0.299265    0.759707    0.434023    11.00000   -1.50000
H36B  2    0.270973    0.854031    0.390512    11.00000   -1.50000
H36C  2    0.377998    0.816621    0.417185    11.00000   -1.50000
AFIX   0
C37   1    0.435989    0.778689    0.311608    11.00000    0.04996    0.04971 =
         0.08966    0.01143   -0.01738   -0.03206
AFIX  33
H37A  2    0.474695    0.732805    0.282280    11.00000   -1.50000
H37B  2    0.484919    0.800492    0.324831    11.00000   -1.50000
H37C  2    0.378030    0.838073    0.298020    11.00000   -1.50000
AFIX   0
O13   4    0.012643    0.395309    0.208431    11.00000    0.03546    0.02714 =
         0.02960   -0.00281   -0.00707   -0.01526
O14   4    0.006158    0.533037    0.154794    11.00000    0.03466    0.03086 =
         0.02972   -0.00184   -0.00598   -0.01575
C38   1    0.000505    0.449006    0.163202    11.00000    0.02844    0.02910 =
         0.02887   -0.00272   -0.00253   -0.01185
C39   1   -0.021102    0.401300    0.118484    11.00000    0.04647    0.03690 =
         0.03328   -0.00384   -0.00894   -0.02011
C40   1   -0.109654    0.365676    0.141044    11.00000    0.05924    0.05800 =
         0.06560   -0.00331   -0.02199   -0.03570
AFIX  33
H40A  2   -0.175913    0.424377    0.151072    11.00000   -1.50000
H40B  2   -0.090114    0.319948    0.173125    11.00000   -1.50000
H40C  2   -0.119976    0.329756    0.113467    11.00000   -1.50000
AFIX   0
C41   1   -0.052857    0.476653    0.071071    11.00000    0.13027    0.06560 =
         0.04810    0.01413   -0.04439   -0.05841
AFIX  33
H41A  2   -0.118556    0.534646    0.082804    11.00000   -1.50000
H41B  2   -0.064782    0.444267    0.042376    11.00000   -1.50000
H41C  2    0.004136    0.500000    0.057232    11.00000   -1.50000
AFIX   0
C42   1    0.082108    0.308264    0.102666    11.00000    0.06367    0.06692 =
         0.06292   -0.03493   -0.00226   -0.01735
AFIX  33
H42A  2    0.139885    0.330297    0.088301    11.00000   -1.50000
H42B  2    0.071129    0.273104    0.074944    11.00000   -1.50000
H42C  2    0.101010    0.262171    0.134684    11.00000   -1.50000
AFIX   0
O15   4   -0.175520    0.900784    0.189191    11.00000    0.03227    0.02467 =
         0.04622   -0.00224   -0.01063   -0.00866
O16   4   -0.129305    0.734514    0.183463    11.00000    0.02841    0.02586 =
         0.04236    0.00010   -0.01008   -0.00860
C43   1   -0.194967    0.825715    0.180785    11.00000    0.03303    0.02804 =
         0.04002    0.00072   -0.00817   -0.01427
C44   1   -0.307470    0.850111    0.168904    11.00000    0.03638    0.03097 =
         0.07007    0.00261   -0.02069   -0.01311
C45   1   -0.343542    0.944177    0.130554    11.00000    0.04430    0.06123 =
         0.07539    0.02014   -0.03249   -0.02111
AFIX  33
H45A  2   -0.415570    0.959279    0.123300    11.00000   -1.50000
H45B  2   -0.294485    0.931934    0.096461    11.00000   -1.50000
H45C  2   -0.343761    1.001788    0.147247    11.00000   -1.50000
AFIX   0
C46   1   -0.379906    0.874926    0.222951    11.00000    0.03081    0.13048 =
         0.09308    0.04023   -0.00861   -0.02926
AFIX  33
H46A  2   -0.358221    0.815444    0.248355    11.00000   -1.50000
H46B  2   -0.453805    0.893730    0.217508    11.00000   -1.50000
H46C  2   -0.374266    0.931559    0.237743    11.00000   -1.50000
AFIX   0
C47   1   -0.311604    0.761009    0.146120    11.00000    0.08120    0.04824 =
         0.28390   -0.04178   -0.11189   -0.00534
AFIX  33
H47A  2   -0.288282    0.701822    0.171604    11.00000   -1.50000
H47B  2   -0.264435    0.746084    0.111492    11.00000   -1.50000
H47C  2   -0.384791    0.777067    0.140421    11.00000   -1.50000
AFIX   0
O17   4    0.269749    0.296568    0.412666    11.00000    0.04081    0.03043 =
         0.03322    0.00299   -0.01105   -0.01783
O18   4    0.267358    0.452935    0.395651    11.00000    0.04099    0.02852 =
         0.03283    0.00160   -0.00892   -0.01587
C48   1    0.281300    0.373513    0.425162    11.00000    0.03339    0.02944 =
         0.03107   -0.00217   -0.00527   -0.01152
C49   1    0.311467    0.366769    0.481774    11.00000    0.04919    0.04009 =
         0.03235   -0.00101   -0.01271   -0.01679
C50   1    0.221992    0.351091    0.522743    11.00000    0.09824    0.10465 =
         0.03842   -0.01707    0.01243   -0.05963
AFIX  33
H50A  2    0.154946    0.410642    0.520542    11.00000   -1.50000
H50B  2    0.240471    0.341762    0.559453    11.00000   -1.50000
H50C  2    0.213745    0.290915    0.514247    11.00000   -1.50000
AFIX   0
C51   1    0.414154    0.273509    0.486613    11.00000    0.06825    0.07547 =
         0.06276   -0.01296   -0.03395    0.00217
AFIX  33
H51A  2    0.433907    0.267799    0.522784    11.00000   -1.50000
H51B  2    0.471150    0.279664    0.459200    11.00000   -1.50000
H51C  2    0.403606    0.212941    0.480974    11.00000   -1.50000
AFIX   0
C52   1    0.316939    0.463525    0.493418    11.00000    0.12615    0.06366 =
         0.05152    0.00807   -0.03849   -0.05622
AFIX  33
H52A  2    0.248446    0.520319    0.489623    11.00000   -1.50000
H52B  2    0.373368    0.474919    0.467765    11.00000   -1.50000
H52C  2    0.332566    0.458356    0.530450    11.00000   -1.50000
AFIX   0
O19   4    0.182324    0.586158    0.131533    11.00000    0.03125    0.03512 =
         0.03051   -0.00376    0.00339   -0.01242
O20   4    0.266717    0.418462    0.146678    11.00000    0.04509    0.03315 =
         0.04479   -0.00675    0.00511   -0.00807
C53   1    0.249709    0.497852    0.117433    11.00000    0.03664    0.03781 =
         0.03700   -0.00850   -0.00042   -0.01628
C54   1    0.312119    0.491108    0.060045    11.00000    0.04662
PART   1
C55A  1    0.331823    0.583021    0.039218    10.50000    0.07022
AFIX  33
H55A  2    0.263559    0.641572    0.038354    10.50000   -1.50000
H55B  2    0.371453    0.572891    0.002541    10.50000   -1.50000
H55C  2    0.373453    0.595214    0.063025    10.50000   -1.50000
AFIX   0
C56A  1    0.421947    0.395884    0.061853    10.50000    0.06451
AFIX  33
H56A  2    0.409835    0.333601    0.063923    10.50000   -1.50000
H56B  2    0.452780    0.397195    0.093745    10.50000   -1.50000
H56C  2    0.471153    0.397964    0.029008    10.50000   -1.50000
AFIX   0
C57A  1    0.250904    0.463785    0.024130    10.50000    0.07373
AFIX  33
H57A  2    0.182121    0.520656    0.021117    10.50000   -1.50000
H57B  2    0.238983    0.403711    0.040251    10.50000   -1.50000
H57C  2    0.292408    0.449490   -0.011974    10.50000   -1.50000
AFIX   0
PART   2
C55B  1    0.370358    0.563881    0.055947    10.50000    0.05141
AFIX  33
H55D  2    0.318183    0.634312    0.054280    10.50000   -1.50000
H55E  2    0.422992    0.551469    0.023156    10.50000   -1.50000
H55F  2    0.406458    0.551545    0.087833    10.50000   -1.50000
AFIX   0
C56B  1    0.386208    0.387855    0.044444    10.50000    0.08272
AFIX  33
H56D  2    0.354977    0.363942    0.020001    10.50000   -1.50000
H56E  2    0.398811    0.342054    0.076967    10.50000   -1.50000
H56F  2    0.453938    0.389140    0.026024    10.50000   -1.50000
AFIX   0
C57B  1    0.227919    0.541988    0.019594    10.50000    0.10618
AFIX  33
H57D  2    0.170416    0.602902    0.034950    10.50000   -1.50000
H57E  2    0.198336    0.494123    0.013612    10.50000   -1.50000
H57F  2    0.262558    0.560631   -0.014974    10.50000   -1.50000
AFIX   0
PART   0
O21   4    0.388531    0.484023    0.242026    11.00000    0.02791    0.02939 =
         0.03962    0.00044    0.00107   -0.01201
O22   4    0.368533    0.629233    0.193731    11.00000    0.03013    0.03964 =
         0.05330    0.01268   -0.00077   -0.01144
C58   1    0.425073    0.541379    0.210182    11.00000    0.03254    0.03080 =
         0.03795   -0.00010   -0.00363   -0.01315
C59   1    0.546549    0.498375    0.192192    11.00000    0.02685    0.04114 =
         0.04860   -0.00136    0.00178   -0.01280
C60   1    0.574676    0.563833    0.144743    11.00000    0.04181    0.10259 =
         0.10677    0.05058    0.00654   -0.02229
AFIX  33
H60A  2    0.652029    0.535762    0.133793    11.00000   -1.50000
H60B  2    0.550681    0.633151    0.155834    11.00000   -1.50000
H60C  2    0.539347    0.564538    0.114189    11.00000   -1.50000
AFIX   0
C61   1    0.587767    0.389052    0.177637    11.00000    0.05289    0.07097 =
         0.15696   -0.05642    0.04348   -0.02828
AFIX  33
H61A  2    0.568725    0.348824    0.208663    11.00000   -1.50000
H61B  2    0.665457    0.362064    0.168208    11.00000   -1.50000
H61C  2    0.555767    0.385592    0.146632    11.00000   -1.50000
AFIX   0
C62   1    0.598023    0.498263    0.239777    11.00000    0.04237    0.15516 =
         0.07479   -0.03237   -0.00804   -0.02760
AFIX  33
H62A  2    0.579019    0.456513    0.269988    11.00000   -1.50000
H62B  2    0.573095    0.567795    0.250734    11.00000   -1.50000
H62C  2    0.675599    0.470408    0.229709    11.00000   -1.50000
AFIX   0
N11   3   -0.144043    1.029388    0.248735    11.00000    0.03359    0.02572 =
         0.04740   -0.00876   -0.00485   -0.00598
N12   3   -0.236475    1.074905    0.244395    11.00000    0.03378    0.03319 =
         0.06165   -0.01428   -0.00284   -0.00893
N13   3   -0.324943    1.121583    0.240452    11.00000    0.03879    0.06344 =
         0.12884   -0.04086   -0.01595   -0.00367
N21   3    0.166871    0.182727    0.393043    11.00000    0.04298    0.03380 =
         0.04156    0.00832   -0.00985   -0.02244
N22   3    0.182838    0.151930    0.438316    11.00000    0.04005    0.04153 =
         0.04265    0.00786   -0.00403   -0.02252
N23   3    0.196447    0.120112    0.482146    11.00000    0.08007    0.09190 =
         0.05133    0.02599   -0.01748   -0.05377
SAME N72 C73 C74
SAME N73A C75A C76A
SAME N73B C75B C76B
N71   3    0.370285    0.951768    0.151030    11.00000    0.08692    0.19617 =
         0.12277   -0.05314    0.01230   -0.08430
C71   1    0.389115    0.885349    0.122736    11.00000    0.05042    0.13828 =
         0.07882   -0.01215   -0.00586   -0.03683
C72   1    0.406663    0.805066    0.087674    11.00000    0.07461    0.08736 =
         0.14551   -0.01883   -0.03196   -0.02385
AFIX 137
H72A  2    0.407213    0.744542    0.110000    11.00000   -1.50000
H72B  2    0.475241    0.788773    0.064277    11.00000   -1.50000
H72C  2    0.349297    0.828069    0.065243    11.00000   -1.50000
AFIX   0
N72   3    0.132550    0.092748    0.008013    11.00000    0.42834    0.08888 =
         0.11726   -0.02379    0.10631   -0.09690
C73   1    0.086584    0.164543   -0.018788    11.00000    0.19119    0.12788 =
         0.07211   -0.05960    0.06219   -0.11858
C74   1    0.033727    0.257114   -0.050705    11.00000    0.19318    0.15688 =
         0.06484   -0.00988   -0.02623   -0.04628
AFIX 137
H74A  2   -0.012322    0.311052   -0.026413    11.00000   -1.50000
H74B  2   -0.009477    0.245242   -0.073703    11.00000   -1.50000
H74C  2    0.087363    0.277424   -0.073505    11.00000   -1.50000
AFIX   0
PART 1
N73A  3    0.546357    0.882181   -0.011938    10.59000    0.20836
C75A  1    0.593234    0.867032   -0.058016    10.59000    0.21233
C76A  1    0.608369    0.830162   -0.113162    10.59000    0.14457
PART 2
N73B  3    0.677388    0.800268   -0.000788    10.41000    0.20694
C75B  1    0.653204    0.874940   -0.032806    10.41000    0.24690
C76B  1    0.678227    0.927396   -0.084421    10.41000    0.27511

HKLF 4

REM  L618 in P-1
REM R1 =  0.0449 for   17985 Fo > 4sig(Fo)  and  0.0543 for all   21679 data
REM    979 parameters refined using     50 restraints

END

WGHT      0.0894      0.0000

REM Highest difference peak  0.807,  deepest hole -2.709,  1-sigma level  0.167
Q1    1   0.7020  0.7494  0.0236  11.00000  0.05    0.81
Q2    1   0.2245  0.5867  0.0192  11.00000  0.05    0.73
Q3    1   0.3804  0.8177  0.1503  11.00000  0.05    0.71
Q4    1   0.1046  0.5449  0.2236  11.00000  0.05    0.65
Q5    1   0.2397  0.5048  0.0202  11.00000  0.05    0.63
Q6    1   0.1982  0.6039  0.2790  11.00000  0.05    0.62
Q7    1   0.0669  0.5626  0.2413  11.00000  0.05    0.60
Q8    1   0.0006  0.5785  0.2253  11.00000  0.05    0.57
Q9    1  -0.0771  0.5922  0.2058  11.00000  0.05    0.57
Q10   1  -0.0001  0.7422  0.1788  11.00000  0.05    0.56
Q11   1   0.0195  0.6306  0.2895  11.00000  0.05    0.54
Q12   1   0.1976  0.4365  0.3303  11.00000  0.05    0.54
Q13   1   0.6511  0.9079 -0.1267  11.00000  0.05    0.52
Q14   1  -0.0236  0.5975  0.2307  11.00000  0.05    0.50
Q15   1   0.3531  0.4100  0.0287  11.00000  0.05    0.50
Q16   1   0.2159  0.5933  0.2681  11.00000  0.05    0.49
Q17   1   0.5043  0.8284  0.0381  11.00000  0.05    0.49
Q18   1  -0.0431  0.6195  0.2177  11.00000  0.05    0.49
Q19   1   0.1768  0.4800  0.2804  11.00000  0.05    0.46
Q20   1  -0.0244  0.7427  0.2215  11.00000  0.05    0.45
Q21   1   0.1609  0.5492  0.2718  11.00000  0.05    0.45
Q22   1   0.1442  0.4563  0.2717  11.00000  0.05    0.45
Q23   1   0.1578  0.4944  0.2911  11.00000  0.05    0.45
Q24   1   0.2652  0.5151  0.2206  11.00000  0.05    0.45
Q25   1   0.1380  0.5078  0.3244  11.00000  0.05    0.45
Q26   1   0.0585  0.8367  0.1029  11.00000  0.05    0.44
Q27   1   0.1006  0.6211  0.2809  11.00000  0.05    0.44
Q28   1   0.2776  0.4197  0.0302  11.00000  0.05    0.43
Q29   1   0.1018  0.7002  0.1707  11.00000  0.05    0.43
Q30   1  -0.0020  0.5314  0.2519  11.00000  0.05    0.43
Q31   1   0.1343  0.5188  0.2990  11.00000  0.05    0.43
Q32   1   0.2058  0.3736  0.3139  11.00000  0.05    0.43
Q33   1   0.0150  0.7002  0.2512  11.00000  0.05    0.42
Q34   1   0.5525  0.8594 -0.0600  11.00000  0.05    0.42
Q35   1   0.1851  0.5218  0.3926  11.00000  0.05    0.42
Q36   1   0.3347  0.3456  0.3214  11.00000  0.05    0.42
Q37   1   0.2890  0.4099  0.3334  11.00000  0.05    0.42
Q38   1   0.1594  0.4854  0.3255  11.00000  0.05    0.41
Q39   1   0.0117  0.5572  0.3090  11.00000  0.05    0.41
Q40   1  -0.1210  0.6841  0.2365  11.00000  0.05    0.41
;
_shelx_res_checksum   72291

_shelx_hkl_file
;
 -13 -17 -14    0.05    2.37
 -13 -16 -17   15.43    2.05
 -13 -16 -16   33.23    2.54
 -13 -15 -19    0.15    1.92
 -13 -15 -18   15.49    2.40
 -12 -18  -9    9.19    1.99
 -12 -17  -9   17.18    1.92
 -12 -16 -10   81.91    2.05
 -12 -15 -11    1.24    1.75
 -12 -14 -13  100.64    2.12
 -12 -13 -15   13.39    1.79
 -12 -12 -20    2.55    1.79
 -12 -12 -19   29.88    2.24
 -12 -12 -18    2.32    2.47
 -11 -18  -5    1.86    1.74
 -11 -17  -5    0.67    2.11
 -11 -16  -6   15.80    1.84
 -11 -13  -9   10.45    1.65
 -11 -12 -11   28.36    1.74
 -11 -11 -13   35.15    2.11
 -11 -10 -28   16.85    3.15
 -11 -10 -18   31.67    2.20
 -11 -10 -17   28.91    2.13
 -10 -18  -2    4.87    1.82
 -10 -17  -2   29.57    1.84
 -10 -15  -3    0.25    1.68
 -10 -14  -4    7.26    1.58
 -10 -13  -5  108.23    1.92
 -10 -12  -6  148.55    2.01
 -10 -11  -8    0.86    1.65
 -10 -10 -10    9.06    1.59
 -10  -9 -13  242.30    2.50
 -10  -8 -26    0.68    3.27
 -10  -8 -19   12.33    2.08
 -10  -8 -18   19.52    2.32
  -9 -16   0    2.42    1.75
  -9 -15   0  110.49    2.24
  -9 -14  -1   94.29    1.86
  -9 -11  -4    0.74    1.53
  -9  -8 -10  202.46    2.55
  -9  -7 -14   15.36    1.99
  -8 -15   2    1.90    1.61
  -8 -13   1   34.16    1.62
  -8 -10  -2    0.80    1.53
  -8  -7  -8  226.24    2.36
  -8  -6 -11  197.38    2.92
  -8  -5 -18   72.80    3.06
  -8  -5 -17   35.68    3.17
  -7 -14   4  177.22    2.01
  -7 -11   2    1.42    1.51
  -7 -10   1  329.50    2.48
  -7  -8  -2  199.67    2.11
  -7  -7  -4  261.15    2.30
  -7  -6  -6  205.98    2.49
  -7  -4 -14   42.82    3.12
  -6 -18   6   15.09    1.81
  -6 -15   6    1.90    1.60
  -6 -14   6    0.87    1.89
  -6 -12   5  368.66    2.57
  -6 -11   4    7.73    1.52
  -6  -8   1   -0.88    1.60
  -6  -5  -5  567.89    3.32
  -6  -4  -8  212.40    3.00
  -5 -17   8   29.89    2.20
  -5 -16   8   36.14    2.13
  -5 -11   6  353.72    2.33
  -5  -7   2    2.12    1.56
  -5  -4  -4  596.07    3.64
  -5  -3  -7   -1.15    2.45
  -4 -17   9   -0.63    1.79
  -4 -14   9  122.37    1.89
  -4 -11   8    1.14    1.87
  -3 -12  10   67.88    2.07
  -3  -6   5    6.25    1.68
  -2  -8   9   56.37    1.99
  -2  -7   8    1.29    1.50
  -2  -4   4  188.07    2.43
  -2   1 -25   98.60    2.41
  -1 -11  12   14.74    1.55
  -1  -9  11   44.54    1.69
  -1  -4   6  995.31    4.42
  -1   1 -30    6.91    2.20
  -1   2 -14  349.59    3.15
   0 -11  13  168.58    2.04
   0  -6  10  207.56    2.41
   1 -11  14  134.13    2.30
   1  -7  12    1.56    1.82
   1   3 -26    6.38    2.12
   1   3  -9  474.06    3.21
   2 -14  15   29.71    2.39
   2 -13  15   12.86    2.12
   2 -12  15   -0.32    2.06
   2   3  -5    4.42    1.85
   2   4 -23    6.78    1.68
   2   4 -12   61.07    2.10
   3  -9  15   28.20    1.97
   3  -7  14  377.02    2.94
   3   4 -27   56.29    2.40
   3   4  -7   14.47    2.17
   4 -10  16   15.91    2.04
   4   3   0  137.70    2.51
   4   5 -23   82.28    2.31
   4   5 -10  391.25    2.57
   5  -2  11    6.06    1.20
   5   5  -6    5.11    1.59
   6 -11  17    2.81    2.47
   6   6 -22   20.25    1.77
   6   6 -10   -0.47    1.58
   7   4   2  712.51    3.52
   7   6 -25   26.22    1.91
   8  -3  14   -0.01    1.13
   8   4   3  105.96    2.28
   8   5   0  635.85    3.14
   8   6  -4   -0.78    1.59
   8   7 -18   16.03    1.80
   8   7 -17   51.14    1.82
   8   7 -16   88.68    1.91
   8   7 -15   44.68    1.74
   8   7 -14  132.74    1.98
   8   7 -13   12.68    1.64
   9  -7  17    6.77    2.71
   9   1  10   49.72    2.77
   9   4   4   31.13    2.03
   9   7 -21    7.33    1.82
   9   7  -9  239.85    2.15
  10   2   9   12.32    1.94
  10   3   7    9.99    2.14
  10   4   5  357.24    2.74
  10   5   2   24.74    1.90
  10   6  -1   99.45    1.86
  10   7 -23    1.28    1.91
  10   7  -7  163.15    2.00
  11   0  12    3.57    2.91
  11   5   3   11.50    1.62
  11   7  -5   48.43    1.79
  12   1  11    0.83    2.17
  12   3   8  241.40    2.55
  12   4   6   12.53    1.66
  12   6   0   15.33    2.00
  12   7  -4    8.61    1.68
  13  -2  14    9.34    3.78
  13   1  11   -0.24    2.22
  13   3   8  232.06    2.82
  13   4   6   22.17    2.08
  13   7  -4  204.49    2.55
  13   8 -15   -0.24    1.84
  13   8 -14   20.13    1.89
  13   8 -13   -2.46    1.76
  13   8 -12    8.28    1.84
  14  -1  13    0.92    3.04
  14   0  12  141.80    3.55
  14   1  11   61.69    2.43
  14   3   8    3.73    2.05
  14   4   6   31.29    2.17
  14   5   4    7.25    1.72
  14   6   1    2.75    1.70
  14   7  -4   45.20    2.22
  14   7  -3   29.88    1.81
  14   8 -15   17.02    2.00
  14   8 -14    3.19    1.92
  14   8 -13    7.48    1.87
  14   8 -12    0.16    1.83
  15   4   6  123.71    2.25
  15   6   1   11.64    1.84
  15   7  -4    6.61    2.18
  15   7  -3    4.85    1.79
  15   8 -13   -1.64    1.99
  16   2   9    1.34    2.21
  16   5   3   52.28    2.36
  16   6   0    2.57    1.83
  16   7  -5    0.00    2.33
  16   7  -4   11.10    1.90
  17   3   7   19.42    2.06
  17   4   5    6.28    1.89
  17   6  -1    1.18    2.31
  17   7  -6    5.27    2.01
  17   7  -5   -1.41    2.03
 -13 -17 -13    2.07    2.38
 -13 -16 -15   41.20    2.13
 -13 -15 -17    1.80    2.34
 -13 -14 -21    1.45    2.35
 -12 -18  -8   41.80    2.04
 -12 -17  -8   80.41    2.53
 -12 -16  -9    6.97    1.87
 -12 -15 -10    0.62    2.10
 -12 -14 -12    0.27    1.73
 -12 -13 -14   10.35    1.76
 -12 -12 -17    0.80    2.12
 -11 -18  -4   56.30    2.44
 -11 -16  -5    0.48    1.71
 -11 -15  -6   12.48    1.78
 -11 -14  -7   50.00    1.78
 -11 -13  -8   82.07    2.27
 -11 -12 -10    1.51    1.65
 -11 -10 -16    1.68    2.00
 -10 -16  -2   33.10    1.81
 -10 -14  -3    0.30    2.02
 -10 -13  -4   11.78    1.94
 -10 -11  -7  213.01    2.53
 -10 -10  -9   15.30    2.01
 -10  -9 -12   94.09    2.18
 -10  -8 -27    3.25    4.18
 -10  -8 -17    5.61    2.27
  -9 -18   1   18.66    1.84
  -9 -17   1   13.47    1.75
  -9 -13  -1  149.13    1.99
  -9 -12  -2    5.86    1.61
  -9 -10  -5   64.78    1.77
  -9  -9  -7   49.93    1.74
  -9  -7 -13  150.36    2.75
  -8 -18   3    2.03    1.84
  -8 -17   3   13.48    1.79
  -8 -16   3   64.81    1.82
  -8 -14   2   34.75    1.66
  -8  -9  -3  162.87    2.06
  -8  -8  -5  383.58    2.56
  -7 -18   5    7.13    1.84
  -7 -17   5    8.03    1.78
  -7 -16   5   24.27    1.74
  -7 -13   4   76.93    2.05
  -7 -12   3    0.50    1.52
  -7  -9   0    4.97    1.55
  -7  -5  -9  318.36    3.11
  -6  -4 -32    0.10    3.29
  -5 -15   8   79.94    1.87
  -5 -14   8   14.83    1.69
  -5 -12   7   28.19    1.57
  -5  -2 -27    3.96    2.66
  -4 -13   9   18.35    1.56
  -4  -6   3    3.27    1.61
  -4  -3  -3  122.30    2.72
  -4  -2 -32    3.56    2.61
  -4  -1 -27    3.30    2.32
  -3 -10   9  230.25    2.04
  -3  -4   2  264.97    2.70
  -3   0 -26   35.11    2.20
  -2 -16  12   29.00    2.25
  -2 -15  12   26.39    1.77
  -2 -14  12   33.48    2.07
  -2 -11  11    2.84    1.48
  -2  -9  10  127.17    2.08
  -2  -6   7  394.18    2.63
  -2   0 -31    1.19    2.12
  -2   1 -24   38.54    2.35
  -1 -15  13   61.35    2.32
  -1 -14  13   72.43    2.26
  -1   2 -22   94.85    2.03
  -1   2 -21   21.77    2.00
  -1   2 -15  163.69    2.60
   0 -10  13   15.18    1.87
   0  -7  11  190.50    2.04
   0  -5   9   64.28    1.81
   0   2 -28   11.74    2.12
   1 -10  14  101.54    2.13
   1  -8  13   23.00    1.81
   1   2 -31    9.25    2.27
   1   2  -4   50.25    2.36
   1   3 -25   19.94    2.08
   2 -11  15   13.38    1.67
   2   3 -29    3.45    2.23
   2   4 -22   58.04    1.77
   2   4 -21   14.05    1.62
   2   4 -13   18.30    1.63
   3   2   1  382.48    3.84
   3   4 -26    2.14    2.05
   4  -7  15   20.68    2.21
   4   4 -29   32.91    2.04
   4   4  -4   39.87    1.89
   4   5 -22    8.24    1.70
   4   5 -21  133.50    2.34
   4   5 -11  212.34    2.18
   5  -8  16   32.39    2.03
   5  -6  15  123.46    2.44
   5   5 -26    1.74    1.73
   6 -10  17   25.03    2.22
   6  -5  15    6.30    2.13
   6   5 -28    2.14    1.90
   6   5  -4  276.86    2.37
   6   6 -21  186.44    2.30
   6   6 -20   12.23    1.72
   6   6 -19   41.83    2.08
   6   6 -12    5.13    1.56
   6   6 -11  300.50    2.33
   7   5  -2   98.15    1.91
   7   6 -24    4.39    1.76
   7   6 -23   62.85    2.28
   7   6  -7    0.97    1.57
   8   6 -25    0.51    2.25
   8   6  -5   10.51    1.59
   9   5   1  445.08    2.69
   9   6  -3  195.45    2.10
   9   7 -20    8.77    1.78
   9   7 -19   41.47    1.81
   9   7 -18   -0.55    1.69
   9   7 -17   86.29    2.27
   9   7 -12    0.74    1.62
   9   7 -11   81.67    1.79
   9   7 -10   10.59    1.69
  10   6  -2  243.97    2.19
  10   7 -22   22.85    2.01
  10   7 -21    6.62    1.87
  10   7  -8   91.42    1.84
  11   6  -1   38.10    1.70
  11   7  -6   22.55    1.69
  12  -2  14   58.42    4.82
  12   0  12   46.67    3.25
  12   5   3   84.98    1.87
  12   7  -5  274.92    2.30
  13  -1  13   52.56    3.76
  13   0  12  229.16    4.16
  13   5   3  136.21    2.39
  13   6   0    5.30    1.66
  13   7  -5   75.43    1.87
  14   5   3   33.65    2.16
  14   6   0  132.59    2.08
  14   7  -5   16.92    2.17
  15   2   9    2.34    2.45
  15   5   3   23.98    2.27
  15   6   0   33.26    1.85
  15   7  -5   23.74    1.86
  16   0  11   11.10    3.04
  16   1  10   73.68    2.75
  16   3   7    0.92    2.21
  16   4   5   12.19    2.28
  16   6  -1   38.40    2.35
  16   7  -6    1.33    1.89
  17   2   8   13.02    2.38
  17   5   2   12.34    1.99
  17   6  -2    3.80    2.34
 -13 -17 -12   -1.30    2.25
 -13 -16 -14   34.88    2.06
 -13 -15 -16  150.05    2.49
 -13 -15 -15   -0.18    2.29
 -13 -14 -20   43.69    2.56
 -13 -14 -19    1.28    2.27
 -12 -18  -7    5.03    1.91
 -12 -16  -8  154.43    2.62
 -12 -15  -9    5.61    2.14
 -12 -14 -11   25.89    1.80
 -12 -13 -13   39.53    2.19
 -12 -12 -16   12.71    2.16
 -11 -17  -4   48.35    1.95
 -11 -15  -5   30.03    2.19
 -11 -14  -6   91.14    2.27
 -11 -12  -9   24.84    2.03
 -11 -11 -12  184.66    2.24
 -11 -10 -15    2.15    2.03
 -10 -18  -1    8.66    1.88
 -10 -17  -1   24.06    1.85
 -10 -15  -2   65.18    1.84
 -10 -12  -5  119.38    1.90
 -10  -8 -16    1.18    2.19
  -9 -16   1   54.03    1.86
  -9 -15   1    1.20    1.96
  -9 -14   0   39.41    1.71
  -9 -11  -3   12.30    1.56
  -9  -8  -9    2.94    1.92
  -8 -15   3  120.49    1.91
  -8 -13   2   17.28    1.60
  -8 -12   1   12.90    1.53
  -8 -11   0  173.23    2.00
  -8 -10  -1  110.80    1.83
  -8  -7  -7  122.80    2.27
  -8  -5 -16   36.45    3.01
  -7 -15   5   54.39    1.77
  -7  -7  -3  146.67    2.33
  -6 -18   7   28.58    1.91
  -6 -17   7    2.53    1.71
  -6 -16   7    8.09    1.66
  -6 -15   7   31.64    1.71
  -6 -13   6   -0.51    1.58
  -6 -11   5  378.08    2.36
  -6 -10   4    8.55    1.49
  -6  -9   3   43.82    1.60
  -6  -7   0  166.14    2.06
  -6  -6  -2  122.78    2.09
  -5 -13   8    5.79    1.52
  -5 -10   6  218.23    2.02
  -5  -9   5  115.30    1.80
  -5  -8   4    0.94    1.52
  -5  -6   1  204.30    2.23
  -5  -5  -1   59.11    2.35
  -5  -3 -32   27.57    3.18
  -4 -17  10    0.90    1.73
  -4 -16  10    1.33    1.67
  -4 -15  10    6.00    1.68
  -4 -12   9   56.75    1.65
  -4  -9   7   78.42    1.73
  -4  -8   6  298.47    2.31
  -4  -1 -26    1.21    2.32
  -3 -15  11    0.29    1.63
  -3 -14  11    4.13    1.60
  -3 -13  11   36.14    2.00
  -3 -11  10    7.16    1.54
  -3  -5   4   26.95    1.85
  -3  -3   0    8.35    1.99
  -3  -1 -31    4.31    2.53
  -3   0 -25    6.23    2.32
  -3   0 -12  637.51    5.72
  -2 -13  12    1.82    1.55
  -2  -5   6  143.66    2.17
  -2   1 -23  193.86    2.91
  -2   1 -13  145.51    2.67
  -1 -13  13   67.45    1.83
  -1 -12  13    5.25    1.97
  -1 -10  12   37.17    1.67
  -1  -7  10  335.70    2.59
  -1  -6   9   17.67    1.91
  -1   1 -29    2.04    2.13
  -1   1  -7    2.23    2.38
  -1   2 -20  140.85    2.37
  -1   2 -19    1.85    1.92
  -1   2 -18   13.25    1.95
  -1   2 -17   98.00    2.28
  -1   2 -16  126.04    2.44
   0 -15  14    2.96    1.74
   0 -14  14   23.78    1.85
   0 -13  14   34.05    1.73
   0 -12  14   35.73    2.08
   0  -8  12   64.95    1.69
   0  -4   8    3.55    2.01
   0   1 -32    1.88    2.27
   0   2 -27    1.67    2.06
   0   2  -8   36.24    1.93
   1 -14  15    2.62    2.15
   1 -13  15    8.81    2.13
   1  -3   8  325.09    3.21
   1   3 -24    2.15    2.00
   1   3 -10   -0.16    1.73
   2 -10  15   71.99    2.22
   2  -8  14   14.12    1.58
   2   3 -28   33.67    2.30
   2   4 -20  179.12    2.21
   2   4 -19    4.70    1.63
   2   4 -18  186.95    2.45
   2   4 -17    4.30    1.91
   2   4 -16  257.84    2.55
   2   4 -15    1.16    1.52
   2   4 -14   98.80    1.88
   3 -13  16   44.67    1.96
   3 -12  16   38.22    1.90
   3 -11  16    8.21    2.04
   3  -8  15   63.40    2.07
   3   4 -25   14.39    2.12
   3   4  -8  464.71    2.94
   4  -9  16   10.39    1.90
   4   4 -28    2.95    1.80
   4   5 -20   72.80    1.90
   4   5 -19   63.47    2.14
   4   5 -13   58.60    1.77
   4   5 -12  209.17    2.17
   5 -11  17    1.43    2.11
   5   4  -2  515.61    3.14
   5   5 -25    0.17    1.70
   5   5 -24   25.58    2.22
   5   5  -7   73.12    1.80
   6  -9  17  117.32    2.60
   6   3   3  511.68    3.44
   6   4   0  100.15    2.13
   6   5 -27    2.81    1.86
   6   6 -18    5.48    1.59
   6   6 -17   53.62    1.77
   6   6 -16   17.38    1.64
   6   6 -15  208.09    2.16
   6   6 -14    8.61    1.59
   6   6 -13  293.93    2.28
   7  -8  17    0.58    1.98
   7   0  10    0.62    3.87
   7   6 -22    9.08    1.69
   7   6  -9   15.37    1.89
   7   6  -8  189.35    2.05
   8  -7  17    7.55    2.58
   8  -5  16   29.98    2.89
   8   5  -1    2.05    1.93
   8   6 -24   19.40    1.87
   8   6  -6   32.92    1.67
   9   2   8   67.46    2.43
   9   3   6  379.90    3.17
   9   6  -4    3.39    1.63
   9   7 -16    7.41    1.66
   9   7 -15   49.73    1.79
   9   7 -14    7.73    1.64
   9   7 -13    0.32    1.60
  10   7 -20   26.96    1.92
  10   7 -19    9.46    1.76
  10   7 -18   16.41    1.82
  10   7 -11   75.15    2.14
  10   7 -10  115.71    1.93
  10   7  -9  190.70    2.08
  11  -1  13   15.38    3.69
  11   2   9  187.76    3.05
  11   3   7    3.09    2.28
  11   4   5   40.88    1.76
  11   5   2   10.54    1.99
  11   7 -21    2.53    1.90
  11   7 -20   11.49    1.86
  11   7  -8    7.43    1.64
  11   7  -7   21.79    1.70
  12  -1  13  151.15    4.74
  12   6  -1   17.37    1.64
  12   7  -7   95.54    1.92
  12   7  -6    3.70    1.63
  13   6  -1   57.13    2.13
  13   7  -6  112.63    2.05
  14   2   9   23.60    2.43
  14   6  -1    3.46    2.11
  14   7  -6  163.44    2.20
  15   3   7    9.88    2.13
  15   4   5   95.23    2.53
  15   6  -1   66.77    2.02
  15   7  -7   80.49    2.15
  15   7  -6    5.87    1.78
  16   5   2    0.11    1.81
  16   6  -2   -0.63    2.30
  16   7  -9   44.20    2.53
  16   7  -8    3.07    1.88
  16   7  -7   23.77    1.97
  17   3   6    0.15    2.33
  17   4   4    6.96    1.94
  17   5   1   30.18    2.48
  17   6  -3    5.74    2.38
 -13 -17 -11   12.19    2.38
 -13 -16 -13   20.03    1.96
 -13 -15 -14  205.66    3.02
 -13 -14 -18    2.14    1.87
 -13 -14 -17   -0.24    2.24
 -12 -18  -6    0.83    1.83
 -12 -17  -7   -0.46    1.82
 -12 -14 -10    2.70    1.73
 -12 -13 -12    8.26    1.71
 -12 -12 -15   28.97    2.18
 -11 -18  -3   25.07    1.93
 -11 -17  -3   23.86    1.84
 -11 -16  -4    1.70    1.74
 -11 -13  -7   13.10    1.61
 -11 -11 -11    8.52    1.68
 -11 -10 -14   82.47    2.22
 -10 -18   0    9.77    1.85
 -10 -16  -1   64.48    1.92
 -10 -14  -2   66.37    1.80
 -10 -13  -3   42.56    1.69
 -10 -11  -6   34.70    1.64
 -10 -10  -8    6.93    1.91
 -10  -9 -11  433.85    3.05
  -9 -18   2   34.51    1.94
  -9 -17   2   27.93    1.79
  -9 -16   2   51.35    1.80
  -9 -13   0   43.54    1.72
  -9 -12  -1  266.75    2.29
  -9 -10  -4  128.10    1.94
  -9  -9  -6   73.59    1.84
  -9  -7 -12   37.93    2.09
  -8 -18   4   39.56    1.98
  -8 -17   4   66.67    1.95
  -8 -16   4   53.78    1.79
  -8 -14   3    0.84    1.55
  -8  -8  -4    7.76    1.91
  -8  -6 -30    0.49    4.54
  -8  -6 -10   86.37    2.30
  -7 -18   6    2.81    1.79
  -7 -17   6   20.76    1.85
  -7 -16   6   19.26    1.76
  -7 -14   5    0.06    1.56
  -7 -12   4   48.97    1.62
  -7 -11   3   10.80    1.55
  -7 -10   2    4.09    1.55
  -7  -8  -1  380.65    2.46
  -7  -5 -31    0.57    3.71
  -7  -4 -25    1.90    3.93
  -6 -14   7    7.25    1.54
  -6 -12   6    2.37    1.54
  -6  -8   2  567.77    2.75
  -6  -5  -4   42.49    2.23
  -6  -3 -26    3.00    2.89
  -6  -3 -12  229.57    5.02
  -5 -17   9    6.84    1.75
  -5 -16   9   60.20    1.85
  -5 -15   9   94.21    1.90
  -5 -12   8   15.10    1.89
  -5 -11   7   23.48    1.59
  -5  -2 -26   10.50    2.62
  -4 -14  10   27.97    1.68
  -4 -13  10  117.94    2.17
  -4 -11   9   25.90    1.95
  -4 -10   8   10.80    1.52
  -4  -7   5  234.60    2.12
  -4  -1 -12   89.31    4.84
  -3 -12  11  216.26    2.35
  -3  -9   9   43.16    1.61
  -3  -8   8   12.96    1.53
  -3  -7   7   34.22    1.60
  -3   0 -24  262.12    3.30
  -2 -12  12   23.47    1.65
  -2 -10  11   59.18    1.65
  -2   0 -30    2.13    2.11
  -2   1 -22   40.18    2.16
  -2   1 -14    0.32    2.25
  -1 -11  13    5.46    1.86
  -1  -8  11  151.79    1.92
  -1   1 -28    1.42    2.05
   0 -11  14    2.94    1.92
   0  -9  13    3.42    1.87
   0   2 -26  101.08    2.38
   1 -12  15    0.29    1.62
   1  -9  14   98.97    2.16
   1   2 -30   -0.72    1.75
   1   3 -23   11.32    2.11
   1   3 -11  192.03    2.58
   2 -13  16   16.76    2.18
   2  -5  12    7.82    1.94
   2  -2   8    0.77    2.02
   2   3 -27    2.15    2.16
   2   3  -6   20.67    1.84
   3 -10  16   12.73    2.00
   3  -5  13   58.45    2.27
   3  -4  12   81.83    2.40
   3   3 -30   25.23    2.01
   3   3  -3  802.16    4.08
   3   4 -24   49.68    1.92
   4 -12  17   15.95    2.21
   4  -1   9   26.18    3.37
   4   4 -27   12.98    2.19
   4   4  -5  462.52    2.95
   4   5 -18   51.99    1.70
   4   5 -17   16.44    1.58
   4   5 -16    4.52    1.60
   4   5 -15    3.58    1.58
   4   5 -14   37.12    1.75
   5 -10  17    3.19    2.06
   5  -7  16   15.93    2.26
   5   4 -29    6.11    2.33
   5   5 -23   17.31    1.80
   5   5  -8    0.91    1.55
   6   5 -26    5.54    1.80
   6   5  -5   84.93    1.84
   7  -3  14   51.69    3.18
   7  -2  13    1.97    3.89
   7   3   4   46.54    2.15
   7   4   1  359.43    3.07
   7   5 -27   11.10    2.29
   7   5  -3    2.09    1.57
   7   6 -21   63.65    1.93
   7   6 -20    4.92    1.68
   7   6 -19    5.91    2.08
   7   6 -10    0.77    1.49
   8   3   5   11.45    1.97
   8   6 -23    2.87    1.76
   8   6 -22   10.71    2.13
   8   6  -7  174.43    2.01
   9   5   0  131.24    1.98
   9   6 -24   12.72    1.93
   9   6  -5   25.22    1.63
  10  -6  17   20.78    3.38
  10   4   4   23.85    2.05
  10   5   1  100.14    1.81
  10   6  -3   36.07    1.69
  10   7 -17   21.60    1.80
  10   7 -16    2.85    1.67
  10   7 -15    7.23    1.70
  10   7 -14    5.74    1.68
  10   7 -13    7.48    1.69
  10   7 -12   45.08    1.75
  11   6  -2  128.32    1.94
  11   7 -19   -0.38    1.79
  11   7 -18    1.98    1.78
  11   7 -17    4.87    1.77
  11   7 -16    1.97    2.16
  11   7 -11    3.22    1.66
  11   7 -10   70.92    1.85
  11   7  -9    1.67    1.63
  12   2   9   74.78    2.54
  12   3   7    1.75    2.33
  12   4   5    8.09    1.58
  12   5   2  116.59    2.28
  12   6  -2    0.58    1.98
  12   7 -20    0.72    1.88
  12   7 -19    2.28    1.93
  12   7 -18    3.73    1.85
  12   7  -9    2.54    1.68
  12   7  -8    9.32    1.71
  13   2   9    4.51    2.33
  13   4   5   27.62    2.17
  13   5   2    2.97    2.05
  13   7 -18    6.95    1.96
  13   7  -8   27.24    1.77
  13   7  -7   84.67    1.93
  14   3   7  100.55    2.46
  14   4   5  199.90    2.68
  14   5   2   35.16    2.18
  14   7  -9    3.03    2.17
  14   7  -8  129.10    2.17
  14   7  -7    4.45    1.74
  15   1  10    2.03    2.54
  15   5   2    1.41    1.72
  15   6  -2   44.10    1.94
  15   7 -11    4.38    2.35
  15   7 -10   32.45    1.98
  15   7  -9   41.16    1.99
  15   7  -8   46.30    2.06
  16   2   8   10.33    2.27
  16   4   4   44.43    2.41
  16   5   1   15.68    2.32
  16   6  -3   90.48    2.53
  16   7 -10    4.58    1.95
  17   4   3   31.11    2.44
  17   5   0   13.15    2.42
  17   6  -4   40.39    2.09
 -13 -17 -10   -0.22    2.29
 -13 -16 -12    4.40    1.90
 -13 -15 -13    4.02    2.26
 -13 -14 -16   35.88    2.40
 -12 -17  -6   24.14    1.92
 -12 -16  -7    6.88    1.88
 -12 -15  -8   57.04    1.93
 -12 -14  -9    2.80    2.06
 -12 -13 -11   16.02    2.07
 -12 -12 -14   21.42    2.20
 -12 -11 -24    6.18    2.64
 -12 -11 -23   49.93    2.95
 -12 -11 -22   37.09    2.42
 -12 -11 -21  106.45    2.67
 -12 -11 -20  107.42    2.95
 -11 -18  -2   30.88    1.99
 -11 -16  -3   25.99    1.81
 -11 -15  -4   46.07    1.85
 -11 -14  -5   16.29    1.68
 -11 -13  -6  108.25    2.26
 -11 -12  -8   18.53    1.67
 -11 -11 -10  149.43    2.33
 -10 -17   0   40.24    1.86
 -10 -16   0   37.68    1.81
 -10 -15  -1   21.34    1.68
 -10 -12  -4   57.93    1.78
 -10  -8 -15    0.28    1.97
  -9 -18   3   27.49    2.30
  -9 -15   2   33.55    1.71
  -9 -14   1   60.14    1.75
  -9 -11  -2   10.57    1.62
  -9  -8  -8   14.76    1.94
  -8 -18   5    6.81    2.28
  -8 -15   4   15.25    1.69
  -8 -13   3    2.78    1.52
  -8 -12   2   91.50    1.76
  -8 -11   1   32.25    1.63
  -8  -9  -2   49.93    1.75
  -7 -15   6   14.74    1.64
  -7 -13   5   22.96    1.61
  -7  -9   1  423.50    2.49
  -7  -6  -5   67.08    1.79
  -7  -5  -8    0.35    1.91
  -6 -17   8   46.90    1.97
  -6 -16   8   62.92    1.83
  -6 -15   8   87.64    2.22
  -6 -13   7   32.99    1.62
  -6  -4  -7    9.82    2.00
  -5 -14   9  131.81    1.90
  -5  -7   3   88.50    1.74
  -5  -4  -3    7.94    2.11
  -4 -16  11    3.09    2.05
  -4  -5   2  394.65    2.83
  -4  -4   0  272.32    2.72
  -4  -2 -31    6.29    2.58
  -4  -2  -6    2.94    2.62
  -4  -1 -25   86.80    2.82
  -3 -16  12   40.92    1.94
  -3 -15  12   34.52    1.79
  -3 -10  10   66.37    1.75
  -3  -6   6  799.90    3.35
  -3  -1 -30    3.18    2.47
  -2 -16  13   35.05    1.90
  -2 -15  13   84.61    1.97
  -2 -14  13   61.35    2.18
  -2 -11  12   54.26    1.65
  -2  -8  10    6.01    1.84
  -2  -7   9    5.21    1.85
  -2   0 -29   10.42    2.13
  -2   1 -21  253.28    2.90
  -2   1 -20    2.33    2.31
  -2   1 -15  372.70    3.60
  -1 -15  14   26.79    1.87
  -1 -14  14   15.18    2.09
  -1  -9  12   58.67    1.63
  -1  -5   8  172.49    2.23
  -1   0 -32    0.95    2.26
   0   1 -31    0.79    2.19
   0   2 -25   -1.15    2.03
   0   2  -9   33.84    2.26
   1 -11  15    1.08    1.58
   1  -6  12    5.51    1.84
   1  -5  11  287.71    2.75
   1   2 -29   30.22    2.28
   1   3 -22    0.61    1.66
   1   3 -21   28.96    2.06
   1   3 -12   82.54    2.20
   2 -12  16   69.52    2.32
   2  -9  15   52.43    1.75
   2  -6  13    4.01    1.86
   2  -4  11   45.61    2.13
   2   3 -26   23.91    2.19
   3  -6  14  220.65    2.59
   3   3 -29   20.13    2.34
   3   4 -23    2.56    1.66
   3   4  -9   54.07    1.87
   4 -11  17   52.02    2.33
   4  -8  16   22.42    2.00
   4  -5  14    0.56    2.18
   4  -4  13  329.01    3.29
   4   4 -26    7.77    1.74
   5  -9  17   43.70    2.16
   5   2   4  470.56    4.10
   5   3   1  139.44    2.71
   5   4 -28    1.78    2.28
   5   5 -22  125.69    2.09
   5   5 -21   -0.61    2.01
   5   5  -9    1.25    1.57
   6  -8  17  115.56    2.51
   6  -6  16    9.37    2.23
   6   5 -25    4.36    1.79
   6   5 -24   29.32    2.22
   6   5  -6   47.39    1.70
   7  -7  17    6.72    2.27
   7  -4  15    5.32    2.72
   7   5 -26    0.42    1.86
   7   6 -18    6.53    1.65
   7   6 -17   97.09    1.88
   7   6 -16   88.23    1.90
   7   6 -15  201.40    2.15
   7   6 -14  138.43    1.98
   7   6 -13  131.28    1.98
   7   6 -12   35.37    1.69
   7   6 -11    1.75    1.55
   8   1   9   34.94    2.81
   8   4   2  662.99    3.56
   8   5  -2  282.81    2.60
   8   6 -21    4.78    1.68
   8   6  -8   89.16    1.79
   9  -6  17    0.44    2.84
   9   4   3   17.71    2.00
   9   6 -23    1.36    1.89
   9   6  -6   18.88    2.00
  10   1  10  277.95    3.71
  10   6  -4  101.53    1.86
  11  -6  17    7.33    3.68
  11   5   1    1.56    1.97
  11   6  -3    2.32    1.59
  11   7 -15    3.48    1.71
  11   7 -14   20.82    1.74
  11   7 -13    0.97    1.72
  11   7 -12   75.34    1.90
  12   7 -17   16.79    1.91
  12   7 -16   -0.05    1.78
  12   7 -15   13.25    1.76
  12   7 -14    3.67    1.81
  12   7 -13   17.98    1.78
  12   7 -12   15.74    1.74
  12   7 -11    9.24    1.70
  12   7 -10    1.19    1.67
  13   3   7   88.75    2.31
  13   6  -2   -0.04    1.71
  13   7 -17    9.07    1.93
  13   7 -16   15.58    1.88
  13   7 -15    8.61    1.87
  13   7 -14   10.35    1.84
  13   7 -13    8.78    1.83
  13   7 -12    7.35    1.75
  13   7 -11    0.35    1.77
  13   7 -10    1.13    1.72
  13   7  -9   39.77    1.83
  14   6  -2   46.96    1.81
  14   7 -16   20.00    2.08
  14   7 -15    1.48    1.91
  14   7 -14   14.70    1.93
  14   7 -13    9.89    1.91
  14   7 -12    2.45    1.87
  14   7 -11   17.46    1.84
  14   7 -10   25.89    1.87
  15  -2  13    0.85    3.44
  15   0  11   72.22    3.27
  15   4   4   69.30    2.39
  15   5   1   10.82    2.18
  15   6  -3   52.49    2.02
  15   7 -13   -1.26    1.95
  15   7 -12   10.57    1.99
  16   3   6    5.20    2.24
  16   6  -4   17.72    1.95
  17   2   7   42.91    2.57
  17   3   5    2.03    2.33
  17   5  -1   11.61    2.38
  17   6  -6   46.17    2.26
  17   6  -5   21.32    2.05
 -13 -17  -9   58.82    2.53
 -13 -16 -11   -0.59    1.82
 -13 -15 -12   97.32    2.57
 -13 -14 -15    3.70    2.22
 -13 -13 -23    3.68    2.43
 -13 -13 -22   35.64    2.55
 -13 -13 -21    2.31    2.34
 -13 -13 -20   27.03    2.47
 -13 -13 -19    0.07    2.24
 -12 -18  -5    9.27    1.92
 -12 -17  -5   10.93    2.21
 -12 -16  -6  136.12    2.16
 -12 -15  -7   34.12    1.85
 -12 -13 -10   -1.18    2.07
 -12 -12 -13   93.62    2.32
 -12 -11 -26    7.00    3.06
 -12 -11 -25   10.84    2.78
 -12 -11 -19  114.10    2.70
 -12 -11 -18  126.81    2.70
 -11 -17  -2   27.73    1.83
 -11 -15  -3    2.26    2.03
 -11 -14  -4   16.22    2.03
 -11 -12  -7    9.91    2.02
 -11 -10 -13  218.69    2.62
 -11  -9 -23   13.02    3.02
 -11  -9 -22    3.75    2.75
 -11  -9 -21    3.93    2.38
 -11  -9 -20    2.25    2.34
 -11  -9 -19    2.22    2.35
 -10 -18   1    3.98    1.80
 -10 -17   1    3.23    2.12
 -10 -15   0  100.10    2.22
 -10 -14  -1    3.28    1.63
 -10 -13  -2   92.04    1.84
 -10 -11  -5  191.71    2.06
 -10 -10  -7  191.78    2.19
 -10  -9 -10  125.68    1.97
 -10  -8 -14   13.47    2.01
  -9 -17   3   10.47    1.78
  -9 -16   3   14.27    2.11
  -9 -14   2   77.94    2.13
  -9 -13   1  129.44    1.88
  -9 -12   0    6.77    1.92
  -9 -10  -3   60.29    1.73
  -9  -9  -5    0.44    1.55
  -9  -7 -11  165.10    2.58
  -9  -6 -22   53.91    4.75
  -9  -6 -21   84.50    4.20
  -9  -6 -20  162.75    4.39
  -9  -6 -19  283.87    4.79
  -8 -17   5    9.24    1.77
  -8 -16   5   80.27    1.87
  -8 -14   4   40.02    1.68
  -8 -10   0    2.43    1.51
  -8  -7  -6  157.38    2.09
  -8  -6  -9   18.00    2.05
  -8  -5 -15    4.25    2.52
  -7 -18   7   18.55    1.86
  -7 -17   7   -1.76    1.74
  -7 -16   7    7.36    2.09
  -7 -14   6  100.31    1.87
  -7 -12   5   62.66    2.01
  -7 -11   4    9.56    1.56
  -7 -10   3  100.30    2.07
  -7  -8   0    8.53    1.98
  -7  -7  -2   52.16    2.05
  -7  -4 -13  137.36    3.28
  -6 -14   8    3.48    1.56
  -6 -12   7  235.96    2.35
  -6 -11   6   52.08    1.68
  -6 -10   5   12.85    1.48
  -6  -9   4   94.61    1.74
  -6  -7   1   54.34    2.07
  -6  -6  -1  181.16    2.51
  -6  -4 -31   62.63    3.42
  -5 -17  10    6.86    1.79
  -5 -16  10    8.88    1.72
  -5 -15  10   24.24    2.08
  -5 -13   9    6.08    1.55
  -5 -11   8  126.06    2.12
  -5 -10   7   17.58    1.52
  -5  -9   6   37.42    1.61
  -5  -8   5   40.76    1.93
  -5  -3 -31    0.84    2.48
  -5  -2 -25    2.71    2.54
  -4 -15  11   15.25    1.73
  -4 -14  11   85.47    2.16
  -4 -12  10   19.11    1.58
  -4  -9   8   39.89    1.93
  -4  -8   7   89.56    2.10
  -4  -6   4   12.25    1.64
  -3 -14  12    1.38    1.63
  -3 -13  12   14.93    1.94
  -3 -11  11  225.91    2.12
  -3   0 -23    0.99    1.99
  -3   0 -13    8.56    2.66
  -2 -13  13   57.92    1.78
  -2  -9  11   85.39    1.73
  -2  -6   8   15.15    1.62
  -2  -4   5   19.22    2.25
  -2  -3   3   34.06    2.12
  -2   1 -19   15.76    1.98
  -2   1 -18   -0.27    1.82
  -2   1 -17   87.51    2.35
  -2   1 -16    8.15    1.95
  -1 -13  14   39.63    1.73
  -1 -12  14  207.48    2.47
  -1 -10  13    4.41    1.85
  -1  -3   5  113.06    2.27
  -1  -2   3    6.42    2.79
  -1   1 -27   76.15    2.35
   0 -14  15    6.09    1.72
   0 -13  15   23.49    2.15
   0 -10  14   10.62    1.94
   0  -7  12  226.16    2.41
   0  -6  11  144.34    2.30
   0  -2   5   78.79    2.79
   0   1 -30   19.23    2.29
   0   2 -24   97.86    2.35
   1 -14  16    8.41    2.18
   1 -10  15    1.22    1.88
   1  -7  13    4.41    1.49
   1   2 -28    3.05    2.15
   1   3 -20   13.36    1.97
   1   3 -19   80.81    2.11
   1   3 -13   66.41    2.18
   2 -11  16    0.10    1.62
   2  -7  14   51.99    1.93
   2   2 -31   12.25    1.94
   2   3  -7    0.81    2.24
   3 -12  17   19.59    2.19
   3  -9  16    1.00    1.90
   3  -7  15   26.16    2.26
   3  -3  11  608.77    4.31
   3   3 -28   18.63    2.23
   3   4 -22  105.31    1.95
   3   4 -21  112.49    2.25
   3   4 -10  411.23    2.72
   4 -10  17   43.96    2.21
   4  -6  15  316.79    3.19
   4  -3  12    0.86    2.29
   4   3 -30    0.91    2.28
   4   3  -1  325.28    3.04
   4   4 -25    8.11    1.74
   4   4  -6  118.09    2.12
   5   4 -27    0.36    2.19
   5   4  -3  178.98    2.31
   5   5 -20  100.88    1.95
   5   5 -19   12.34    1.98
   5   5 -11    2.95    1.65
   5   5 -10  108.08    1.91
   6   4  -1    0.80    1.75
   6   5 -23   39.96    1.79
   7 -10  18    0.45    2.15
   7   5 -25   31.47    1.88
   7   5  -4   37.35    1.68
   8  -9  18    3.13    2.52
   8   2   7  411.20    3.80
   8   5 -26   23.03    2.43
   8   6 -20    4.46    1.66
   8   6 -19   -0.82    1.63
   8   6 -18   62.71    2.22
   8   6 -10  114.23    1.86
   8   6  -9   94.79    1.81
   9   5  -1  351.19    2.50
   9   6 -22    4.30    1.74
   9   6 -21    9.63    1.80
   9   6  -7   65.87    1.76
  10   3   6   22.87    2.00
  10   5   0   65.83    1.70
  10   6 -23    3.43    1.91
  10   6 -22   25.81    1.98
  10   6  -5   23.71    1.60
  11   4   4  138.07    2.14
  11   6  -4  122.35    1.94
  12   4   4   60.04    2.17
  12   5   1   14.15    2.05
  12   6  -3  101.99    1.90
  13   5   1  116.57    2.30
  13   6  -3   -0.81    1.64
  14   1  10   13.48    2.45
  14   4   4    2.84    2.13
  14   5   1   85.19    2.28
  14   6  -3    0.77    1.70
  15  -1  12   13.19    2.97
  15   2   8    1.27    2.12
  15   3   6   33.07    2.23
  15   6  -4    8.65    1.79
  16   1   9   49.54    2.59
  16   4   3    5.47    2.19
  16   5   0    3.18    1.88
  16   6  -6   11.59    2.35
  16   6  -5   82.72    2.19
  17   4   2   -0.49    2.37
  17   5  -2    3.68    2.46
 -13 -16 -10    3.27    1.83
 -13 -15 -11    7.11    2.22
 -13 -14 -14   66.91    2.06
 -13 -13 -18    6.05    2.21
 -13 -13 -17    0.65    2.20
 -12 -18  -4   15.20    1.83
 -12 -15  -6  124.66    2.45
 -12 -14  -8    4.84    1.71
 -12 -12 -12    2.33    2.00
 -12 -11 -17   18.68    2.18
 -12 -11 -16   15.92    2.08
 -11 -18  -1   17.02    1.84
 -11 -17  -1   57.81    2.34
 -11 -16  -2    2.25    1.76
 -11 -13  -5    4.93    1.61
 -11 -11  -9    7.07    1.58
 -11 -10 -12  129.13    2.40
 -11  -9 -24    0.15    3.06
 -11  -9 -18    1.57    2.27
 -10 -16   1    3.94    1.70
 -10 -12  -3   43.21    1.70
 -10  -9  -9  196.03    2.41
 -10  -8 -13   39.36    2.35
  -9 -18   4   19.04    1.92
  -9 -15   3   12.00    1.65
  -9 -11  -1    1.69    1.59
  -9  -8  -7   29.35    1.92
  -9  -6 -18   68.57    3.44
  -8 -18   6    2.95    2.21
  -8 -15   5  175.96    2.10
  -8 -12   3    0.97    1.47
  -8 -11   2  131.86    1.89
  -8  -9  -1   17.92    1.64
  -8  -8  -3  331.49    2.39
  -7 -15   7    0.60    1.65
  -7 -13   6   91.48    1.77
  -7  -9   2  149.34    2.20
  -6 -17   9    0.87    1.70
  -6 -16   9    3.55    1.69
  -6 -13   8   18.17    1.97
  -6  -8   3   72.26    2.13
  -6  -3 -25   48.36    3.19
  -5 -14  10    7.79    1.93
  -5 -12   9    2.09    1.55
  -5  -6   2   67.58    1.87
  -5  -5   0  402.00    2.91
  -5  -3  -6  350.22    3.69
  -4 -13  11   -1.70    1.54
  -4 -11  10  177.80    2.26
  -4 -10   9   22.23    1.56
  -4  -7   6  133.14    2.17
  -4  -2 -30    0.04    2.40
  -4  -1 -24    0.41    2.29
  -3  -8   9   62.89    2.00
  -3  -4   3  183.24    2.42
  -3  -1 -29    0.68    2.38
  -3   0 -22  194.25    2.81
  -2 -12  13   38.00    1.61
  -2 -10  12  183.22    2.06
  -2   0 -28   17.51    2.13
  -1  -4   7  468.48    3.40
  -1   0 -31   14.68    2.24
  -1   1 -26   15.87    2.07
   0 -12  15   29.05    1.69
   0  -8  13    9.07    1.86
   0  -5  10  153.90    2.31
   0  -3   7  388.26    3.39
   0   2 -23    3.44    2.05
   1 -13  16    1.17    1.68
   1 -12  16   25.66    2.11
   1  -8  14   42.62    1.89
   1  -4  10   55.61    2.01
   1   1 -32    9.31    2.39
   1   2  -5   98.28    2.40
   1   3 -18   14.19    1.66
   1   3 -17  213.81    2.26
   1   3 -16   48.40    2.05
   1   3 -15  298.25    2.50
   1   3 -14  220.23    2.30
   2 -10  16    7.64    2.05
   2  -8  15  126.57    2.26
   2   2 -30   13.73    1.93
   2   2  -2   46.00    2.53
   2   3 -25    1.11    1.75
   2   3 -24    0.23    2.02
   3 -11  17   44.86    2.22
   3   4 -20   75.69    1.87
   3   4 -19  137.41    1.97
   3   4 -12   21.31    1.63
   3   4 -11   79.70    1.83
   4   4 -24    3.89    1.65
   5  -8  17  117.36    2.69
   5  -5  15   24.99    2.22
   5  -4  14  460.40    3.97
   5   4 -26   13.80    2.15
   5   5 -18    1.14    1.61
   5   5 -17   -0.44    1.55
   5   5 -16  100.28    1.85
   5   5 -15    2.24    1.59
   5   5 -14  190.56    2.06
   5   5 -13   11.32    1.64
   5   5 -12  212.98    2.17
   6 -10  18    1.14    2.09
   6   2   5  396.60    3.71
   6   4 -28   10.13    1.88
   6   5 -22   26.41    1.78
   6   5 -21   60.68    2.20
   6   5  -7   75.81    1.86
   7  -9  18    8.79    2.48
   7  -5  16    1.13    2.41
   7   2   6   28.50    2.50
   7   4   0  205.75    2.69
   7   5 -24    2.14    1.76
   7   5  -5   87.84    1.84
   8  -6  17   54.62    2.88
   8   5 -25    5.09    1.81
   8   5  -3    1.59    1.57
   8   6 -17    2.48    1.68
   8   6 -16   72.70    1.84
   8   6 -15    3.22    1.63
   8   6 -14   49.42    1.76
   8   6 -13    3.06    1.61
   8   6 -12   10.98    1.60
   8   6 -11    2.60    1.62
   9  -8  18   14.16    2.89
   9   6 -20    1.02    1.76
   9   6 -19   26.39    1.77
   9   6  -9  308.82    2.64
   9   6  -8   30.38    1.69
  10   2   8    1.45    2.12
  10   4   3  121.55    2.24
  10   6 -21   12.68    1.84
  10   6 -20   13.17    1.81
  10   6  -6    4.30    1.61
  11   1  10   11.68    2.48
  11   5   0   30.61    2.06
  11   6 -22   47.56    2.15
  11   6 -21    0.09    1.91
  11   6  -5    9.53    1.68
  12   6  -5  190.13    2.44
  12   6  -4   26.99    1.72
  13   1  10    7.24    2.56
  13   4   4    1.61    1.63
  13   6  -4   32.30    1.80
  14   2   8   26.82    2.43
  14   3   6    0.55    2.07
  14   6  -5    3.20    1.73
  14   6  -4    1.38    1.75
  15   4   3   76.80    2.46
  15   5   0   42.03    1.89
  15   6  -6    8.51    1.79
  15   6  -5   36.25    1.87
  16   0  10    6.29    2.69
  16   2   7   11.22    2.25
  16   3   5   -1.52    2.21
  16   5  -1    1.14    1.87
  16   6  -9    9.57    2.43
  16   6  -8    0.16    1.91
  16   6  -7   12.20    1.94
  17   2   6    3.14    2.37
  17   3   4    1.37    2.36
  17   4   1   25.62    2.45
  17   5  -3    5.31    2.39
 -14 -16 -15   23.93    2.55
 -13 -17  -8    4.80    1.92
 -13 -16  -9   25.67    1.91
 -13 -15 -10    7.05    2.22
 -13 -14 -13   19.59    1.88
 -13 -13 -16    0.94    2.18
 -12 -18  -3    3.29    1.80
 -12 -17  -4    5.25    1.83
 -12 -14  -7   69.39    1.86
 -12 -13  -9    2.47    1.72
 -12 -12 -11  137.46    2.43
 -12 -11 -15    3.81    2.10
 -11 -18   0   17.21    1.89
 -11 -16  -1   44.83    2.23
 -11 -15  -2   22.53    1.68
 -11 -14  -3    1.16    1.64
 -11 -12  -6   90.54    1.86
 -11 -11  -8   10.44    1.95
 -11 -10 -11  305.19    2.84
 -11  -9 -25    0.72    3.32
 -11  -9 -17    5.17    2.37
 -10 -18   2    2.75    1.82
 -10 -17   2    7.58    1.81
 -10 -15   1   47.65    1.79
 -10 -14   0   99.54    1.89
 -10 -13  -1    1.28    1.59
 -10 -11  -4   39.72    1.64
 -10 -10  -6    0.76    1.62
  -9 -17   4   67.62    1.99
  -9 -16   4  126.12    2.01
  -9 -13   2   40.05    1.74
  -9 -12   1  319.55    2.55
  -9 -10  -2  115.92    1.83
  -9  -9  -4  293.59    2.32
  -9  -7 -10   80.52    2.28
  -9  -6 -17  240.13    3.90
  -8 -17   6   25.44    1.85
  -8 -16   6    5.15    1.70
  -8 -14   5   23.45    1.61
  -8 -10   1  118.73    1.82
  -8  -7  -5  387.24    2.89
  -8  -5 -14    1.46    2.52
  -7 -17   8   10.48    1.75
  -7 -14   7   13.17    1.63
  -7  -6  -4  534.00    3.04
  -6 -15   9    0.55    1.65
  -6  -5  -3  413.57    3.00
  -5 -13  10   48.17    2.02
  -5  -7   4  104.25    1.80
  -5  -2 -24   69.37    2.98
  -4 -16  12    3.10    1.73
  -4 -15  12    0.86    1.58
  -4  -1 -23  102.24    2.78
  -3 -16  13    1.29    1.73
  -3 -15  13    3.74    1.68
  -3 -14  13    2.52    1.99
  -3 -12  12   14.23    1.63
  -3 -10  11  384.08    2.32
  -3  -9  10   52.93    1.58
  -3  -7   8  205.20    2.03
  -3  -5   5   57.88    1.89
  -3  -2 -33    9.25    2.32
  -3  -2  -2    5.21    2.65
  -3   0 -21   49.70    2.18
  -3   0 -14  502.82    4.52
  -2 -15  14    1.63    1.73
  -2 -14  14   18.13    1.72
  -2 -11  13    0.40    1.92
  -2  -5   7  733.73    3.41
  -2  -1 -32   -0.58    2.21
  -1 -15  15    5.43    1.81
  -1 -14  15   22.62    2.20
  -1 -11  14   56.92    1.69
  -1  -8  12   37.62    1.58
  -1  -7  11    2.29    1.40
  -1  -6  10   33.54    1.98
  -1   1 -25  205.22    2.81
  -1   1  -8   97.91    2.80
   0 -11  15  137.08    1.98
   0  -9  14   34.83    1.94
   0   1 -29    6.92    2.12
   0   2 -22   48.56    2.14
   0   2 -10    8.48    1.73
   1  -9  15    2.60    1.98
   1   2 -27   37.79    1.86
   2 -13  17   37.04    2.35
   2  -3  10  736.82    4.35
   2   2 -29   15.33    2.26
   2   3 -23    1.39    2.03
   2   3  -8  277.90    2.97
   3  -8  16    2.06    1.92
   3   2 -31    1.78    2.33
   3   3 -27   12.15    1.80
   3   3  -4   12.14    1.92
   3   4 -18   16.03    1.55
   3   4 -17   32.37    1.74
   3   4 -16   60.42    1.76
   3   4 -15   12.04    1.53
   3   4 -14   68.84    1.80
   3   4 -13   14.68    1.66
   4  -9  17    4.95    2.00
   4  -7  16    4.20    1.85
   4   2   2   21.02    2.50
   4   3 -29    9.35    1.88
   4   4 -23   54.81    1.85
   4   4  -7    9.37    1.72
   5 -11  18    1.59    2.13
   5  -3  13   60.80    2.71
   5   4 -25    3.19    2.07
   5   4  -4  508.68    3.02
   6  -9  18    1.86    2.35
   6  -7  17   54.17    2.47
   6   3   2  595.72    3.55
   6   4 -27   14.93    1.86
   6   4  -2   10.65    1.81
   6   5 -20   10.83    1.66
   6   5  -9   36.54    1.72
   6   5  -8   62.28    1.75
   7   5 -23   48.60    1.90
   7   5 -22   15.52    2.07
   8  -8  18   10.94    2.47
   8   4   1   42.73    1.81
   8   5 -24   23.54    1.85
   9   0  11  159.61    4.02
   9   3   5  252.95    2.89
   9   4   2   40.95    1.74
   9   5 -25   -1.54    1.88
   9   5  -2   81.30    1.91
   9   6 -18   12.07    1.75
   9   6 -17   28.08    1.72
   9   6 -16    2.69    1.68
   9   6 -15    4.21    1.67
   9   6 -14   10.60    2.04
   9   6 -13   56.39    2.10
   9   6 -12   25.71    1.67
   9   6 -11  262.34    2.25
   9   6 -10    6.68    1.64
  10   5  -1  236.75    2.19
  10   6 -19   21.93    1.82
  10   6 -18   10.57    1.81
  10   6  -8  160.39    2.00
  10   6  -7    2.72    1.66
  11   3   6   24.85    2.05
  11   4   3   60.50    2.17
  11   6 -20   32.12    1.98
  11   6 -19    4.70    1.84
  11   6  -7   11.67    2.06
  11   6  -6   51.16    1.76
  12   1  10   22.52    2.37
  12   3   6  155.76    2.48
  12   5   0   -1.56    1.67
  12   6 -20    1.47    1.93
  12   6 -19    0.32    1.89
  12   6  -6   14.10    1.66
  13   3   6  158.58    2.55
  13   5   0   -1.40    1.69
  13   6 -18    0.87    2.37
  13   6  -6   97.08    2.03
  13   6  -5   44.36    1.83
  14   0  11   24.06    2.85
  14   4   3   27.42    2.17
  14   5   0  142.00    2.19
  14   6  -7   -2.19    2.10
  14   6  -6   76.40    2.00
  15   1   9   94.46    2.93
  15   5  -1    0.39    1.77
  15   6  -9   26.23    2.38
  15   6  -8   34.16    2.00
  15   6  -7    0.81    1.81
  16   4   2   27.90    1.98
  16   5  -2    7.32    1.91
  16   6 -10    2.12    1.94
  17   5  -4   -0.57    1.94
 -14 -16 -14    1.79    2.34
 -14 -15 -18   -1.71    2.35
 -14 -15 -17    0.42    2.40
 -13 -17  -7   88.09    2.17
 -13 -16  -8   40.29    1.92
 -13 -14 -12   53.15    2.00
 -13 -13 -15    0.62    2.21
 -12 -17  -3    3.72    1.78
 -12 -16  -4   63.20    1.99
 -12 -15  -5   28.71    1.84
 -12 -14  -6    2.75    2.10
 -12 -13  -8    2.32    2.00
 -12 -11 -14   38.28    2.20
 -11 -17   0    0.55    1.84
 -11 -13  -4   71.19    1.90
 -11  -9 -16    0.79    1.99
 -10 -18   3   10.36    1.86
 -10 -16   2   14.75    1.72
 -10 -12  -2    6.96    1.56
 -10  -9  -8  156.88    2.32
 -10  -8 -12  106.06    2.28
  -9 -18   5   33.13    1.94
  -9 -17   5    4.33    2.14
  -9 -15   4   14.56    1.68
  -9 -14   3   29.72    1.73
  -9 -11   0  111.04    1.88
  -9  -8  -6  197.52    2.42
  -9  -6 -16   19.92    2.81
  -8 -15   6    8.98    1.64
  -8 -12   4   -0.69    1.85
  -8  -9   0  105.74    2.20
  -8  -8  -2  238.75    2.49
  -8  -6  -8   58.24    2.19
  -7 -15   8    1.72    1.63
  -7 -12   6  211.38    2.02
  -7 -11   5  121.47    1.81
  -7 -10   4    0.76    1.47
  -7  -8   1  303.49    2.34
  -7  -7  -1   11.59    1.58
  -7  -5 -30   67.81    3.92
  -7  -5  -7    1.22    1.87
  -7  -4 -24   54.04    4.17
  -7  -4 -12  141.42    3.23
  -6 -17  10   19.62    1.81
  -6 -14   9   21.75    1.61
  -6 -12   8    2.19    1.55
  -6 -11   7  431.57    2.44
  -6 -10   6   58.41    1.66
  -6  -9   5   50.87    1.61
  -6  -7   2  579.01    3.06
  -6  -4  -6  203.61    2.85
  -6  -3 -24   32.48    3.29
  -5 -16  11   12.40    1.74
  -5 -15  11   84.30    1.96
  -5 -11   9    1.72    1.49
  -5 -10   8  189.37    1.89
  -5  -9   7  154.95    1.87
  -5  -3 -30   12.17    2.63
  -4 -14  12   39.13    1.76
  -4 -12  11   98.01    1.79
  -4  -6   5   14.57    1.97
  -4  -5   3   93.46    2.05
  -4  -3  -2   13.22    1.84
  -4  -1 -22   -0.33    2.42
  -3 -13  13    1.34    1.92
  -3 -11  12    0.43    1.53
  -3  -6   7   41.65    2.05
  -3  -3   1  593.02    3.86
  -3  -1 -28   52.78    2.66
  -3   0 -20   57.99    2.31
  -3   0 -19  144.19    2.78
  -3   0 -15   33.30    2.41
  -2 -13  14    3.16    1.67
  -2  -8  11  125.82    2.13
  -2  -7  10    3.19    1.81
  -2   0 -27   56.29    2.32
  -1 -13  15   80.09    1.89
  -1  -9  13   31.31    1.48
  -1   0 -30    1.05    2.14
   0 -14  16    0.82    1.72
   0 -13  16   12.29    2.09
   0   1 -28   64.05    2.35
   0   1  -4  138.10    3.76
   0   2 -21    4.26    1.91
   0   2 -11   19.22    2.10
   1 -11  16   54.93    1.83
   1  -2   7   79.74    2.67
   1   1 -31    6.78    1.87
   1   1  -1 1341.01    8.54
   1   2 -26   49.78    1.93
   2 -12  17    2.49    1.72
   2  -9  16   20.19    2.00
   2   3 -22   26.57    2.06
   3 -10  17    7.38    1.65
   3  -1   8   27.43    3.13
   3   2   0   72.29    2.49
   3   3 -26    2.73    1.65
   4 -12  18    1.49    2.21
   4 -11  18    4.50    2.12
   4   3 -28    1.08    1.85
   4   3  -2  636.18    3.89
   4   4 -22    1.21    1.67
   4   4 -21  117.27    2.35
   4   4  -8   20.53    1.69
   5 -10  18   64.50    2.39
   5  -6  16   40.74    2.09
   5   1   6   45.80    3.20
   5   3 -29    1.53    2.30
   5   3   0  113.82    2.61
   5   4 -24   50.74    2.28
   6   4 -26   33.27    1.95
   6   5 -19   -0.48    1.63
   6   5 -18   54.69    1.79
   6   5 -17   79.80    2.17
   6   5 -11   46.70    2.04
   6   5 -10    7.45    1.62
   7  -8  18   33.42    2.59
   7   1   8  194.60    3.69
   7   3   3  487.75    3.44
   7   4 -27   44.85    2.13
   7   5 -21    2.93    1.74
   7   5  -6   31.49    1.68
   8   3   4   68.68    2.19
   8   5 -23    1.57    1.86
   8   5  -4   79.71    1.85
   9   5 -24    2.20    1.96
   9   5  -3  311.75    2.69
  10   5  -2   87.20    2.14
  10   6 -17    7.97    1.79
  10   6 -16    0.67    1.65
  10   6 -15   31.12    1.79
  10   6 -14    6.89    1.70
  10   6 -13  155.88    2.37
  10   6 -12   82.28    1.88
  10   6 -11  148.01    2.00
  10   6 -10  190.35    2.10
  10   6  -9   53.48    1.77
  11   2   8   17.95    2.06
  11   5  -1    6.11    1.67
  11   6 -18    0.71    1.77
  11   6 -17   12.99    1.82
  11   6 -16   24.45    1.85
  11   6  -9   18.21    2.05
  11   6  -8   -0.02    1.65
  12   2   8  140.47    2.83
  12   4   3   25.70    2.09
  12   5  -1    9.43    2.00
  12   6 -18   16.58    1.89
  12   6 -17   12.38    1.89
  12   6 -16   51.70    2.31
  12   6  -8   15.17    1.69
  12   6  -7  153.24    2.07
  13   2   8  153.62    2.61
  13   4   3   55.05    2.24
  13   5  -1   74.78    2.28
  13   6 -17   64.66    2.08
  13   6 -16    3.22    1.87
  13   6 -15   72.06    2.51
  13   6  -9   81.05    2.33
  13   6  -8   47.41    1.86
  13   6  -7  157.79    2.18
  14  -3  14   11.43    4.04
  14  -1  12   56.22    3.41
  14   5  -1   50.79    1.90
  14   6 -16   10.68    1.98
  14   6 -15    7.08    1.94
  14   6 -14    0.48    1.92
  14   6 -13    0.21    1.93
  14   6 -12   11.60    2.22
  14   6 -11    0.05    2.26
  14   6 -10   82.81    2.05
  14   6  -9    1.65    1.79
  14   6  -8  160.73    2.26
  15   2   7   36.30    2.62
  15   3   5   26.38    2.29
  15   4   2    1.72    2.18
  15   5  -2  105.43    2.11
  15   6 -13    4.23    1.93
  15   6 -12   57.25    2.14
  15   6 -11   29.54    2.05
  15   6 -10   60.68    2.11
  16   1   8   54.70    2.91
  16   3   4   11.40    2.32
  16   4   1    2.34    2.26
  16   5  -4   16.18    2.38
  16   5  -3   30.33    1.99
  17   2   5   21.12    2.81
  17   3   3   16.76    2.44
  17   4   0    0.09    1.95
  17   5  -6    2.97    2.00
  17   5  -5   20.41    2.12
 -14 -16 -13   67.03    2.19
 -14 -15 -16   19.87    2.43
 -13 -17  -6   12.76    1.93
 -13 -16  -7   79.19    2.50
 -13 -15  -9    8.59    1.78
 -13 -14 -11   38.24    1.92
 -13 -13 -14   26.35    2.19
 -12 -18  -2   19.83    1.95
 -12 -16  -3    0.73    2.14
 -12 -15  -4  124.33    2.45
 -12 -13  -7   23.82    2.07
 -12 -12 -10    1.22    1.66
 -12 -11 -13   13.17    2.09
 -11 -18   1    1.67    1.86
 -11 -16   0    4.07    1.73
 -11 -15  -1   17.44    1.70
 -11 -14  -2   10.55    1.61
 -11 -13  -3    4.80    1.96
 -11 -12  -5    0.61    1.63
 -11 -11  -7   15.90    1.65
 -11 -10 -10  150.70    2.39
 -11  -9 -26    4.09    3.68
 -11  -9 -15    0.59    1.96
 -10 -17   3   41.88    1.88
 -10 -15   2   99.84    1.93
 -10 -14   1   14.04    1.65
 -10 -13   0  279.52    2.25
 -10 -11  -3  164.81    1.89
 -10 -10  -5  395.66    2.53
 -10  -8 -11   99.70    2.19
  -9 -16   5    1.38    1.66
  -9 -13   3   68.09    2.02
  -9 -12   2   31.68    1.98
  -9 -10  -1   24.56    1.95
  -9  -9  -3   59.14    2.03
  -9  -7  -9    8.34    1.95
  -8 -17   7    3.38    1.78
  -8 -16   7   20.12    1.72
  -8 -14   6   25.73    1.68
  -8 -13   5   22.62    1.59
  -8 -11   3   14.52    1.57
  -8 -10   2   30.11    1.89
  -8  -5 -13   39.32    2.60
  -7 -17   9   10.76    1.76
  -7 -14   8   23.11    1.98
  -7 -13   7   10.71    1.59
  -7  -9   3  239.03    2.05
  -6 -16  10   58.32    1.87
  -6 -15  10  155.22    2.08
  -6 -13   9    0.72    1.57
  -6  -8   4  323.57    2.63
  -6  -6   0   41.66    1.81
  -6  -4 -30   -0.05    2.83
  -6  -3 -11  298.58    4.97
  -5 -14  11  181.05    2.07
  -5 -12  10    1.98    1.51
  -5  -8   6    2.68    1.57
  -5  -4  -2  160.40    2.36
  -5  -2 -23    0.18    2.57
  -4 -16  13    8.76    2.17
  -4 -13  12   92.39    1.89
  -4 -11  11   59.94    2.01
  -4 -10  10    5.90    1.55
  -4  -9   9   12.81    1.50
  -4  -8   8  257.44    2.18
  -4  -4   1  284.34    2.75
  -4  -3 -33   14.66    2.38
  -4  -2 -29    4.90    2.18
  -3  -2 -32    0.84    2.61
  -3   0 -18   20.14    1.88
  -3   0 -17   51.38    2.40
  -3   0 -16  168.08    3.00
  -2 -12  14   40.01    1.68
  -2 -10  13   30.02    1.93
  -2  -9  12  210.17    1.99
  -2  -2   1   65.56    2.68
  -2  -1 -31   -0.79    2.17
  -2   0 -26   60.72    2.33
  -1 -12  15    2.38    1.60
  -1 -10  14    1.74    1.56
  -1  -5   9   36.88    1.76
  -1   1 -24   37.48    2.17
   0 -12  16   14.65    2.06
   0 -10  15   72.42    1.77
   0  -4   9   75.75    1.92
   0  -1   3    2.00    3.13
   0   0 -32    4.19    2.31
   0   2 -20   12.37    1.99
   0   2 -19   15.83    2.00
   0   2 -12    0.71    1.96
   1 -13  17   27.13    2.24
   1 -10  16   78.44    2.15
   1  -6  13  195.80    2.38
   1   1 -30   21.78    2.36
   1   2 -25   37.09    2.15
   1   2  -6  270.72    3.20
   2 -11  17    4.70    1.63
   2  -6  14    0.79    1.83
   2   2 -28    4.41    1.80
   2   3 -21   13.41    2.01
   2   3  -9   10.11    1.81
   3 -12  18   27.24    2.26
   3   2 -30   15.85    1.93
   3   3 -25   -0.46    1.70
   3   3  -5   72.16    2.06
   4  -8  17   29.75    2.03
   4   3 -27    5.65    1.74
   4   4 -20   15.31    1.66
   4   4 -19   44.95    2.00
   4   4  -9  172.92    2.12
   5  -9  18   73.93    2.63
   5   4 -23   -0.33    1.76
   5   4  -5  508.69    2.95
   6   1   7   28.71    3.18
   6   4 -25   20.62    1.82
   6   4  -3   85.38    2.35
   6   5 -16   46.91    1.78
   6   5 -15  171.99    2.06
   6   5 -14   19.75    1.66
   6   5 -13   89.62    1.80
   6   5 -12    0.98    1.58
   7  -6  17   72.15    2.66
   7   4 -26   -0.47    2.25
   7   4  -1  403.04    2.74
   7   5 -20    7.29    1.65
   7   5 -19   44.22    2.12
   7   5  -8  143.51    2.31
   7   5  -7   38.40    1.72
   8   5 -22    2.91    1.72
   8   5 -21    5.22    2.07
   8   5  -5   11.24    1.69
   9  -7  18    0.80    2.99
   9  -4  16  127.85    4.99
   9   2   7   36.44    2.58
   9   4   1  302.62    2.75
   9   5 -23    1.96    1.90
   9   5 -22   21.58    2.20
  10   3   5  258.95    2.72
  10   4   2    0.20    1.81
  10   5 -23   31.03    2.04
  11   5  -2  129.29    2.25
  11   6 -15   14.54    1.77
  11   6 -14  114.53    2.02
  11   6 -13    8.49    1.76
  11   6 -12  158.19    2.13
  11   6 -11    8.64    1.67
  11   6 -10   54.13    1.84
  12   6 -15   36.56    1.95
  12   6 -14   57.53    1.93
  12   6 -13   62.96    1.94
  12   6 -12   24.06    1.78
  12   6 -11   50.42    1.85
  12   6 -10    0.79    1.70
  12   6  -9    4.59    1.70
  13   0  11   35.68    2.83
  13   5  -2    8.52    2.01
  13   6 -14    7.58    1.85
  13   6 -13   33.72    1.91
  13   6 -12    1.37    1.82
  13   6 -11   -0.45    1.78
  13   6 -10    5.81    1.73
  14  -2  13    4.66    3.22
  14   1   9    8.98    2.42
  14   3   5   99.01    2.47
  14   4   2   27.29    2.22
  14   5  -2  133.59    2.14
  15   0  10   17.52    3.05
  15   4   1   10.70    2.19
  15   5  -3    2.42    1.86
  16   2   6    3.50    2.29
  16   4   0    1.62    2.29
  16   5  -6   16.98    2.44
  16   5  -5   59.30    2.50
  17   3   2    0.75    2.44
  17   4  -1    1.43    1.98
 -14 -17 -10   -0.17    1.86
 -14 -16 -12    4.27    1.93
 -14 -15 -15   22.55    2.04
 -14 -15 -14   54.74    2.56
 -14 -14 -20    9.81    2.77
 -13 -17  -5   31.27    2.36
 -13 -16  -6   49.69    2.40
 -13 -15  -8   36.87    1.93
 -13 -14 -10    9.15    1.74
 -13 -13 -13    0.72    1.73
 -13 -12 -24   20.86    2.88
 -13 -12 -23   21.77    2.93
 -13 -12 -22   45.36    2.54
 -13 -12 -21   82.11    2.73
 -13 -12 -20   54.91    2.53
 -13 -12 -19  101.62    2.65
 -13 -12 -18   25.06    2.30
 -12 -17  -2   38.43    1.97
 -12 -14  -5   97.23    1.94
 -12 -12  -9   91.25    1.95
 -12 -11 -12  140.85    2.46
 -11 -17   1   30.93    1.88
 -11 -15   0    1.99    2.05
 -11 -12  -4  195.78    2.42
 -11 -10  -9  185.06    2.43
 -11  -9 -14   20.21    2.02
 -10 -18   4    2.22    1.84
 -10 -16   3   25.94    1.74
 -10  -9  -7   50.71    1.77
  -9 -17   6   52.74    1.91
  -9 -15   5   25.58    1.68
  -9 -14   4   45.16    1.75
  -9 -11   1   29.77    1.66
  -9  -8  -5   50.10    1.95
  -9  -6 -15   49.44    2.47
  -8 -15   7  118.52    1.94
  -8  -7  -4   24.09    1.66
  -7 -16   9   29.67    1.84
  -7 -12   7  139.00    2.23
  -7 -11   6   66.07    1.70
  -7  -6  -3    5.54    1.67
  -6 -17  11    3.87    2.16
  -6 -14  10   43.17    1.74
  -6 -11   8  135.49    1.90
  -6 -10   7  137.43    1.87
  -5 -16  12    2.23    1.69
  -5 -13  11   24.93    1.61
  -5  -7   5    2.79    1.54
  -5  -6   3  163.45    2.07
  -5  -5   1  101.08    2.16
  -5  -3 -29    1.12    2.71
  -4 -15  13    5.30    1.63
  -4 -12  12   30.66    1.92
  -4  -7   7  315.84    2.32
  -4  -1 -21  161.74    3.04
  -4  -1 -13  502.20    6.34
  -3 -15  14   28.94    1.83
  -3 -14  14   46.06    1.87
  -3 -12  13   27.93    1.63
  -3 -10  12   73.71    2.03
  -3  -9  11   92.09    1.76
  -3  -8  10   18.42    1.59
  -3  -1 -27   12.91    2.39
  -2 -15  15   49.42    2.04
  -2 -14  15   69.88    1.97
  -2  -6   9  254.12    2.25
  -2   0  -7   36.45    3.43
  -1 -14  16   15.19    2.16
  -1 -11  15   60.82    2.16
  -1   0 -29   95.60    2.57
  -1   1 -23   98.98    2.34
  -1   1  -9   22.41    2.62
   0  -8  14   19.50    1.93
   0  -7  13  123.49    1.89
   0  -6  12   66.12    2.01
   0   1 -27   34.84    2.25
   0   2 -18   49.28    2.10
   0   2 -17   33.57    2.07
   0   2 -16  292.28    2.96
   0   2 -15  123.11    2.41
   0   2 -14  115.19    2.37
   0   2 -13  145.90    2.40
   1 -12  17    2.69    2.06
   1  -8  15   56.66    2.02
   1  -7  14    8.37    1.53
   1  -5  12    8.54    1.88
   1  -3   9   22.50    1.74
   1  -1   5   11.42    2.83
   1   2 -24   17.68    2.07
   2 -10  17   45.65    2.16
   2  -7  15  255.96    2.61
   2  -5  13   36.02    2.03
   2   1 -31   17.47    2.41
   2   2 -27   35.94    2.26
   2   3 -20  132.08    2.06
   2   3 -19   11.62    2.04
   2   3 -10  313.99    2.71
   3 -11  18   15.59    2.15
   3  -9  17    4.09    1.57
   3  -6  15    5.36    1.91
   3  -5  14   75.95    2.19
   3   2 -29    0.23    1.80
   3   3 -24    8.29    1.66
   4 -10  18   61.26    2.32
   4  -2  11   51.77    2.92
   4   3 -26    2.27    1.73
   4   4 -18   12.48    1.64
   4   4 -17    9.40    1.94
   4   4 -11  244.91    2.56
   4   4 -10   52.65    1.77
   5  -7  17  121.27    2.42
   5   3 -28   16.42    1.88
   5   4 -22   57.37    1.88
   5   4  -6  215.37    2.26
   6  -8  18   10.89    2.40
   6  -5  16   77.94    2.78
   6  -4  15   32.94    2.54
   6   4 -24   30.19    1.82
   7   4 -25   45.59    1.92
   7   5 -18   -0.60    1.69
   7   5 -17  121.09    1.96
   7   5 -10   40.24    1.97
   7   5  -9   13.45    1.63
   8  -7  18    4.26    2.67
   8   4 -26   12.24    1.91
   8   4   0 1448.13    4.50
   8   5 -20   22.55    1.75
   8   5  -6    6.93    1.64
   9   1   9  192.37    3.42
   9   5 -21   23.79    1.83
   9   5  -4   81.72    1.90
  10  -7  18   21.02    3.33
  10   5 -22    2.27    1.85
  10   5 -21   82.45    2.50
  10   5  -3  230.46    2.21
  11   3   5   40.96    2.10
  11   4   2  144.22    2.13
  11   5 -22   36.98    2.02
  11   5  -3    1.94    1.96
  12   3   5   11.07    2.04
  12   4   2  214.52    2.57
  12   5  -2   45.61    1.79
  13   3   5   43.49    2.14
  13   4   2   25.38    1.72
  13   5  -3    2.29    2.12
  14   2   7   65.54    2.40
  14   5  -3   10.46    1.73
  15   3   4   17.29    2.27
  15   5  -5   10.49    2.24
  15   5  -4  127.08    2.22
  16   0   9   48.50    2.95
  16   3   3    4.47    2.29
  16   4  -1    4.66    2.34
  16   5  -9    2.38    2.48
  16   5  -8   19.40    2.07
  16   5  -7   42.34    2.07
  17   4  -3    7.95    2.49
  17   4  -2    2.19    2.02
 -14 -17  -9    1.77    1.92
 -14 -16 -11   38.61    2.11
 -14 -15 -13   42.16    2.47
 -14 -14 -19   23.92    2.50
 -14 -14 -18   11.63    2.34
 -14 -14 -17    3.73    2.33
 -13 -15  -7    5.82    1.80
 -13 -14  -9   11.47    1.81
 -13 -13 -12   68.98    1.95
 -13 -12 -17   39.87    2.33
 -13 -12 -16    5.26    2.14
 -12 -17  -1    1.15    1.79
 -12 -16  -2    1.20    1.74
 -12 -15  -3   14.68    1.78
 -12 -14  -4    0.47    2.10
 -12 -13  -6    0.93    1.62
 -12 -12  -8    3.09    2.03
 -12 -10 -22    6.77    2.81
 -12 -10 -21    1.11    2.43
 -12 -10 -20   27.08    2.51
 -12 -10 -19    8.59    2.48
 -11 -18   2    0.95    1.82
 -11 -17   2   14.09    2.23
 -11 -16   1   54.80    1.87
 -11 -14  -1    7.41    1.64
 -11 -13  -2    2.20    1.61
 -11 -11  -6  100.21    1.90
 -11  -9 -13  128.39    2.47
 -10 -17   4    5.18    1.78
 -10 -15   3   35.78    1.76
 -10 -14   2  205.04    2.10
 -10 -13   1   25.13    1.72
 -10 -12   0  116.91    2.18
 -10 -11  -2    5.55    1.57
 -10 -10  -4    9.22    1.64
 -10  -8 -10  194.59    2.51
  -9 -16   6  161.35    2.15
  -9  -7  -8  269.84    2.71
  -9  -6 -14    1.69    2.45
  -8 -17   8    2.80    1.82
  -8 -16   8   -0.25    2.08
  -8 -14   7   62.71    2.14
  -8 -13   6   33.24    1.63
  -8 -12   5   34.94    1.64
  -8 -11   4   66.25    1.67
  -8  -9   1   62.06    1.73
  -8  -8  -1   12.80    1.61
  -8  -6  -7   12.47    1.64
  -7 -17  10   -0.02    2.21
  -7 -15   9   32.29    1.77
  -7 -13   8   63.96    1.74
  -7 -10   5   33.04    1.59
  -7  -8   2  291.04    2.30
  -7  -7   0   56.38    1.67
  -7  -5  -6  352.63    2.80
  -7  -4 -11  511.97    4.72
  -6 -16  11    1.07    1.67
  -6 -12   9   47.72    1.65
  -6  -9   6    1.24    1.47
  -6  -5  -2    2.71    1.74
  -6  -3 -23  149.38    4.07
  -5 -15  12    0.37    1.63
  -5 -14  12    3.33    1.98
  -5 -11  10   40.27    1.64
  -5 -10   9    0.83    1.50
  -5  -9   8   24.80    1.58
  -5  -3  -5   67.66    2.55
  -5  -2 -22  159.11    3.45
  -4 -14  13    6.91    1.64
  -4  -3 -32   11.07    2.69
  -4  -2 -28   -0.68    2.49
  -4  -1 -20   51.03    2.51
  -3 -13  14    6.62    1.64
  -3 -11  13   92.72    2.15
  -3  -7   9  103.22    1.86
  -3  -5   6   32.78    1.76
  -3  -4   4  224.84    2.49
  -2 -13  15  185.57    2.20
  -2 -11  14    3.14    1.55
  -2  -4   6 1147.66    4.39
  -2  -1 -30   40.47    2.35
  -2  -1  -2   12.55    3.71
  -2   0 -25  120.99    2.48
  -1 -13  16   23.50    2.13
  -1  -9  14   42.16    2.00
  -1  -8  13   53.27    1.70
  -1  -7  12  285.01    2.19
  -1  -3   6    5.05    2.13
  -1   1 -22   14.69    2.08
   0 -11  16   36.12    1.73
   0  -9  15   39.24    1.98
   0   0 -31   30.22    2.37
   0   1 -26  125.55    2.50
   1 -11  17   19.09    2.05
   1   1 -29    6.70    1.79
   1   2 -23    3.09    2.02
   2 -13  18   17.69    1.86
   2 -12  18   52.59    2.36
   2  -8  16   27.98    2.03
   2  -4  12  206.09    2.66
   2   2 -26    4.25    2.09
   2   2  -3    7.19    2.25
   2   3 -18   60.89    1.83
   2   3 -17   65.18    2.10
   2   3 -12    3.73    2.11
   2   3 -11  192.13    2.37
   3  -7  16  151.43    2.42
   3  -4  13  336.77    3.29
   3  -2  10  215.09    3.53
   3   1   3   17.63    3.32
   3   2 -28    1.67    2.16
   3   3 -23   19.26    1.69
   3   3  -6    4.81    2.21
   4  -5  15  128.96    2.66
   4   2 -30    0.03    1.87
   4   3 -25   36.78    2.18
   4   4 -16   95.40    1.92
   4   4 -15    2.73    1.61
   4   4 -14   61.28    1.84
   4   4 -13   24.06    1.72
   4   4 -12   14.29    1.66
   5 -11  19    1.82    2.17
   5  -2  12  279.99    4.71
   5   2   3  222.92    3.19
   5   3 -27   30.05    1.92
   5   4 -21    2.37    1.59
   5   4 -20   11.02    2.06
   5   4  -7  364.24    2.87
   6 -10  19    1.02    2.44
   6  -6  17    2.63    2.47
   6  -3  14    9.55    2.77
   6   3 -28   61.73    2.11
   6   3   1   16.20    1.85
   6   4 -23   32.30    1.85
   6   4  -4  149.86    2.12
   7  -7  18   19.96    2.69
   7   4 -24    4.03    1.73
   7   4  -2   -0.84    1.64
   7   5 -16   26.98    1.70
   7   5 -15  106.30    1.90
   7   5 -14   44.96    1.75
   7   5 -13   19.66    1.68
   7   5 -12    5.77    1.56
   7   5 -11    0.74    1.57
   8   4 -25    5.16    1.82
   8   5 -19    1.04    1.65
   8   5 -18   43.99    1.81
   8   5  -8   45.60    2.05
   8   5  -7  156.84    1.98
   9  -5  17    3.22    3.52
   9   3   4  465.14    3.35
   9   5 -20   34.40    1.86
   9   5 -19   63.10    2.35
   9   5  -5   33.25    1.73
  10  -5  17    3.38    4.69
  10   0  11    5.28    2.74
  10   4   1   40.77    2.00
  10   5 -20   14.51    1.85
  10   5  -4   25.01    1.70
  11   5 -21    5.13    1.90
  11   5 -20   18.22    1.95
  12   0  11   27.97    2.71
  12   5 -20    3.49    1.98
  12   5  -3    0.52    1.63
  13   2   7   27.26    2.09
  13   5  -4   12.36    2.06
  14   3   4   20.18    2.20
  14   4   1   68.92    1.97
  14   5  -5   -1.41    2.21
  14   5  -4   39.21    1.84
  15  -1  11    9.26    2.71
  15   1   8    1.79    2.19
  15   2   6   18.53    2.24
  15   4   0   50.30    1.99
  15   5  -7    2.43    1.82
  15   5  -6   69.37    2.04
  16   2   5   14.75    2.37
  16   4  -2   23.12    2.39
  16   5 -10    3.50    1.95
  17   1   6   31.78    2.58
  17   2   4    0.72    2.06
  17   3   1   49.13    2.23
  17   4  -4    0.63    2.00
 -14 -17  -8   12.82    1.96
 -14 -16 -10    4.38    1.94
 -14 -15 -12   88.53    2.26
 -14 -14 -16    0.28    2.29
 -13 -17  -4    4.12    1.90
 -13 -16  -5  123.34    2.22
 -13 -15  -6  124.36    2.53
 -13 -14  -8    4.61    1.75
 -13 -13 -11    4.29    1.73
 -13 -12 -15    0.34    2.17
 -12 -18   0   29.31    1.96
 -12 -16  -1    0.76    1.71
 -12 -15  -2   60.52    2.19
 -12 -13  -5  119.62    2.35
 -12 -11 -11   27.82    1.74
 -12 -10 -23   -0.08    2.90
 -12 -10 -18   66.02    2.41
 -12 -10 -17    0.68    2.03
 -12 -10 -16   58.19    2.55
 -11 -18   3   -1.61    1.83
 -11 -16   2    1.01    2.16
 -11 -15   1   89.01    1.95
 -11 -14   0   30.43    1.73
 -11 -12  -3    5.59    1.58
 -11 -11  -5    7.54    1.95
 -11 -10  -8    3.46    1.63
 -11  -9 -27   11.18    4.59
 -11  -9 -12   21.91    2.11
 -10 -17   5   69.22    2.38
 -10 -16   4    7.14    1.72
 -10 -14   3    2.71    2.00
 -10 -11  -1   65.00    2.08
 -10 -10  -3  326.66    2.61
 -10  -9  -6   15.28    1.64
 -10  -7 -20  316.84    4.67
 -10  -7 -19   16.82    2.72
 -10  -7 -18  244.24    3.78
 -10  -7 -17    5.34    2.57
  -9 -17   7    2.78    1.75
  -9 -15   6   77.83    1.86
  -9 -14   5    0.98    1.61
  -9 -13   4    2.08    1.57
  -9 -12   3   96.84    1.79
  -9 -11   2  189.16    2.00
  -9 -10   0   65.94    1.72
  -9  -9  -2   76.47    1.76
  -8 -15   8   -0.44    1.67
  -8 -10   3   61.74    1.69
  -8  -7  -3  451.14    2.96
  -8  -6 -29   45.31    4.50
  -8  -5 -12  298.27    3.44
  -7 -16  10   25.78    1.84
  -7 -14   9    6.33    1.62
  -7  -9   4   82.43    1.72
  -7  -4 -23   74.02    4.53
  -6 -15  11   24.96    1.74
  -6 -13  10   14.60    1.64
  -6  -8   5    9.33    1.60
  -6  -7   3  201.30    2.08
  -6  -6   1  164.78    2.10
  -6  -4 -29   34.88    3.27
  -6  -4  -5 1016.53    4.74
  -5 -12  11    9.28    1.53
  -5  -8   7  200.47    2.02
  -4 -16  14    5.38    1.79
  -4 -15  14   15.65    2.17
  -4 -13  13    2.05    1.56
  -4 -11  12  166.82    2.23
  -4 -10  11  253.66    2.04
  -4  -9  10    9.85    1.49
  -4  -8   9    0.92    1.49
  -4  -6   6  154.77    1.99
  -4  -5   4  275.17    2.46
  -4  -1 -19   28.86    2.36
  -4  -1 -14  128.94    3.94
  -3 -12  14    2.73    1.90
  -3  -6   8  927.17    3.67
  -3  -2 -31    0.58    2.17
  -3  -1 -26  118.90    2.87
  -2 -15  16    2.53    2.22
  -2 -12  15   41.27    2.08
  -2  -9  13   52.24    1.89
  -2  -8  12   24.34    1.55
  -2  -7  11   91.47    1.99
  -2  -5   8   96.74    1.99
  -2  -3   4   10.35    1.98
  -2  -2 -33    2.51    2.64
  -2   0 -24   80.95    2.29
  -1 -12  16  109.48    2.29
  -1 -10  15   23.86    1.93
  -1  -6  11   36.77    1.62
  -1  -4   8  485.41    3.13
  -1  -1 -32   11.12    2.31
  -1   0 -28    1.16    2.09
  -1   1 -21    3.90    2.07
   0 -13  17    7.01    1.73
   0  -5  11   56.31    1.74
   0   0 -30   31.99    2.29
   1  -9  16  133.92    2.05
   1  -4  11  390.21    3.06
   1   0 -32   25.40    2.46
   1   1 -28   62.70    2.37
   1   2 -22    0.59    2.00
   1   2  -7  567.18    3.68
   2  -9  17    8.54    1.92
   2   1 -30    1.79    2.19
   2   3 -16  278.67    2.31
   2   3 -15    2.98    1.55
   2   3 -14  229.94    2.30
   2   3 -13   24.07    1.66
   3 -10  18   11.15    2.07
   3  -8  17   17.68    1.97
   3   3 -22   83.60    1.89
   3   3 -21  116.16    2.30
   4  -9  18   75.20    2.27
   4  -6  16   15.20    1.90
   4  -4  14  307.39    3.29
   4   2 -29    1.83    1.87
   4   3 -24   -0.51    2.02
   4   3  -3  221.94    2.55
   5 -10  19    0.07    2.39
   5  -8  18   32.86    2.47
   5   3 -26   55.56    2.03
   5   3  -1  186.18    2.51
   5   4 -19    4.24    1.64
   5   4  -8   51.24    1.80
   6   3 -27   -0.21    1.85
   6   4 -22    2.49    1.75
   6   4 -21   -0.41    2.03
   7  -9  19    2.68    2.53
   7   3   2   41.18    1.86
   7   4 -23    2.50    1.78
   8  -4  16   84.22    3.88
   8  -3  15   14.40    4.55
   8   2   6   97.91    2.53
   8   3   3    6.78    1.62
   8   4 -24    5.42    1.88
   8   4  -1   80.41    1.96
   8   5 -17   -1.14    1.67
   8   5 -16   35.90    1.74
   8   5 -15   15.32    1.69
   8   5 -14    9.75    1.69
   8   5 -13    4.79    1.97
   8   5 -12   47.86    2.12
   8   5 -11   13.70    2.00
   8   5 -10  149.85    1.98
   8   5  -9  120.93    1.92
   9   4 -25    1.48    1.87
   9   4 -24   18.40    2.34
   9   4   0  508.10    2.89
   9   5 -18    7.10    1.75
   9   5 -17   29.05    1.80
   9   5  -7   69.28    1.79
   9   5  -6   67.60    1.84
  10   2   7   38.46    2.04
  10   3   4   30.50    2.22
  10   5 -19   30.76    1.88
  10   5 -18   26.04    1.87
  10   5  -6    5.80    1.95
  10   5  -5   70.82    1.82
  11   0  11   24.34    2.65
  11   2   7    5.43    2.02
  11   4   1   39.72    1.74
  11   5 -19   10.30    1.86
  11   5 -18    1.96    1.81
  11   5  -5   16.11    1.72
  11   5  -4  118.90    1.95
  12   2   7   20.87    2.13
  12   4   1   23.33    1.75
  12   5 -19   -1.97    1.86
  12   5 -18   70.48    2.11
  12   5  -5   31.77    1.74
  12   5  -4   60.87    1.88
  13  -1  12   41.64    3.23
  13   1   9    3.48    2.04
  13   3   4   65.09    2.36
  13   4   1  184.38    2.23
  13   5 -18   11.56    2.04
  13   5 -17   41.36    2.01
  13   5 -16   14.97    2.35
  13   5  -6    4.68    2.13
  13   5  -5   19.38    1.79
  14   4   0   15.84    2.24
  14   5 -16    0.23    2.00
  14   5 -15    0.19    1.99
  14   5 -14   11.73    1.91
  14   5  -8    3.96    2.24
  14   5  -7    0.73    1.72
  14   5  -6   10.82    1.87
  15  -2  12    6.23    3.05
  15   3   3   35.13    1.97
  15   4  -1    4.57    1.83
  15   5 -13    0.87    2.03
  15   5 -12   60.70    2.15
  15   5 -10   23.03    2.00
  15   5  -9   -0.41    1.84
  15   5  -8    3.28    1.89
  16   1   7   26.95    2.48
  16   3   2   17.43    1.96
  16   4  -3    8.37    1.98
  17   2   3    0.62    2.44
  17   3   0   -0.37    2.02
  17   4  -5   25.45    2.17
 -14 -17  -7   31.36    2.56
 -14 -16  -9    5.44    1.94
 -14 -15 -11   21.52    1.95
 -14 -14 -15    8.80    1.93
 -14 -14 -14   13.75    2.28
 -13 -17  -3    0.86    1.77
 -13 -16  -4   81.14    2.10
 -13 -14  -7    2.27    2.10
 -13 -13 -10   73.22    2.00
 -13 -12 -14    1.26    2.15
 -12 -17   0   31.34    1.96
 -12 -14  -3   20.65    1.75
 -12 -12  -7   16.87    1.73
 -12 -11 -10  177.69    2.15
 -12 -10 -24    3.56    2.88
 -12 -10 -15    9.32    2.04
 -11 -17   3    1.03    1.81
 -11 -13  -1   25.70    1.63
 -11 -10  -7    5.42    2.00
 -11  -9 -11  295.17    2.87
 -10 -16   5   59.24    2.25
 -10 -15   4   13.00    1.69
 -10 -13   2  206.11    2.15
 -10 -12   1  181.11    2.04
 -10  -8  -9  147.40    2.41
 -10  -7 -21   67.61    3.69
 -10  -7 -16   85.26    2.64
  -9 -16   7    3.90    1.80
  -9  -8  -4  260.64    2.26
  -9  -7  -7  121.20    2.33
  -9  -6 -13   54.15    2.44
  -8 -17   9    0.07    1.80
  -8 -16   9    2.91    2.14
  -8 -13   7    3.14    1.59
  -8 -12   6  236.38    2.09
  -8 -11   5    1.56    1.54
  -8  -9   2   44.04    1.97
  -8  -8   0  148.70    2.28
  -8  -6  -6  139.54    2.35
  -7 -15  10   71.04    1.88
  -7 -13   9    1.13    1.58
  -7 -12   8   69.70    1.70
  -7 -11   7  401.25    2.40
  -7 -10   6    5.82    1.52
  -7  -6  -2  316.25    2.52
  -7  -5 -29    2.78    3.41
  -6 -16  12   26.32    1.88
  -6 -14  11   42.90    1.78
  -6 -12  10   -1.26    1.89
  -6 -11   9  124.15    1.85
  -6 -10   8  191.63    2.01
  -5 -15  13    7.36    1.65
  -5 -13  12   30.13    1.68
  -5  -6   4   27.50    1.64
  -5  -4  -1   64.13    2.02
  -5  -3 -28    0.68    2.70
  -5  -2 -21    4.10    2.69
  -4 -14  14    0.90    2.04
  -4 -12  13   22.29    1.99
  -4  -4   2  107.36    2.32
  -4  -3  -1   77.21    2.20
  -4  -2 -27   16.90    2.38
  -4  -2  -5  740.99    6.05
  -4  -1 -18  182.76    3.33
  -4  -1 -17   12.57    2.54
  -4  -1 -15  314.59    4.54
  -3 -14  15   11.06    1.79
  -3  -9  12  239.57    2.34
  -2 -14  16    2.70    1.74
  -2 -10  14   41.60    1.63
  -2  -1 -29   13.28    2.16
  -1 -14  17    0.27    2.18
  -1   0 -27  188.69    2.78
  -1   1 -20   14.28    1.99
  -1   1 -10   18.92    2.26
   0 -12  17    2.57    1.69
   0 -10  16   40.34    1.71
   0  -3   8  367.32    3.30
   0   1 -25   34.60    1.80
   1 -13  18   -0.17    1.80
   1 -10  17   25.03    2.09
   1   2 -21   38.62    2.05
   2 -11  18   53.97    1.89
   2   1   1  332.40    4.76
   2   2 -25   25.13    1.70
   3 -12  19    2.03    2.16
   3   1 -31    3.47    1.91
   3   2 -27    2.00    1.74
   3   3 -20   42.58    2.06
   3   3  -7    2.22    1.81
   4 -11  19   15.79    2.22
   4  -7  17   12.51    1.90
   4   2 -28    5.95    2.20
   4   3 -23  101.59    2.35
   5   3 -25   30.17    1.81
   5   4 -18   34.29    1.62
   5   4 -17   43.10    1.65
   5   4  -9    3.68    1.57
   6  -9  19   54.18    2.74
   6   0   9    1.15    3.95
   6   2   4  803.45    4.67
   6   3 -26   55.70    2.42
   6   4 -20   10.49    1.63
   6   4  -5  144.77    2.07
   7   2   5  272.58    3.10
   7   3 -27   29.11    1.98
   7   4 -22    4.82    1.75
   7   4  -3    0.91    1.67
   8  -5  17   95.45    3.65
   8   4 -23   24.26    1.87
   9   4 -23    2.37    1.81
   9   5 -16    0.85    1.70
   9   5 -15    1.00    1.66
   9   5 -14   44.13    1.76
   9   5 -13  135.94    2.32
   9   5 -10   47.06    1.84
   9   5  -9  452.25    2.67
   9   5  -8   11.64    1.66
  10   1   9    2.22    2.24
  10   4 -23   26.30    2.31
  10   4   0    3.37    1.58
  10   5 -17    4.80    1.69
  10   5 -16    3.22    1.75
  10   5  -8   60.98    2.18
  10   5  -7    2.42    1.63
  11   1   9   53.30    2.50
  11   3   4   59.85    2.22
  11   5 -17   54.25    1.97
  11   5 -16   93.19    2.07
  11   5  -7    2.04    2.11
  11   5  -6   47.21    1.85
  12   1   9   55.22    2.56
  12   3   4    9.29    2.08
  12   4   0  225.45    2.69
  12   5 -17    3.97    1.86
  12   5 -16  163.89    2.23
  12   5 -15   11.45    1.84
  12   5  -7   46.05    1.83
  12   5  -6   51.07    1.79
  13  -4  15   36.53    4.85
  13   4   0   71.28    1.87
  13   5 -15   23.35    1.96
  13   5 -14   14.31    1.86
  13   5 -13    1.18    1.75
  13   5 -12   26.28    2.29
  13   5  -9   93.46    2.38
  13   5  -8    4.57    1.70
  13   5  -7   40.77    1.85
  14   0  10  156.54    3.21
  14   1   8    0.41    2.37
  14   2   6   13.11    2.13
  14   3   3   41.16    2.30
  14   4  -1  189.60    2.66
  14   5 -13   22.29    1.97
  14   5 -12   56.66    1.99
  14   5 -11   19.92    1.82
  14   5 -10   46.41    1.97
  14   5  -9    4.38    1.84
  15   2   5   81.64    2.50
  15   4  -2   86.49    2.14
  16   2   4   26.53    2.38
  16   3   1    7.36    1.90
  16   4  -5    4.36    1.99
  16   4  -4   45.48    2.10
  17   1   5    1.65    2.46
  17   3  -1   27.73    2.13
 -14 -17  -6   20.56    2.38
 -14 -16  -8   -1.49    1.88
 -14 -15 -10   39.08    2.01
 -14 -14 -13   21.26    2.34
 -13 -17  -2    0.95    2.26
 -13 -16  -3   52.40    2.36
 -13 -15  -5    2.85    1.87
 -13 -13  -9    5.86    1.76
 -13 -12 -13   43.53    1.86
 -13 -12 -12   31.12    2.19
 -12 -17   1    0.70    1.82
 -12 -16   0   31.87    1.88
 -12 -15  -1    1.12    1.68
 -12 -14  -2    6.55    1.99
 -12 -13  -4    1.55    1.68
 -12 -12  -6    2.88    2.02
 -12 -11  -9   49.61    2.13
 -12 -10 -25    0.29    3.25
 -12 -10 -14    0.77    2.01
 -11 -16   3    8.27    1.76
 -11 -15   2    3.57    1.72
 -11 -14   1   37.65    1.74
 -11 -13   0   92.51    2.19
 -11 -12  -2  129.45    1.95
 -11 -11  -4  341.63    2.49
 -10 -17   6   13.95    1.81
 -10 -14   4  142.36    2.32
 -10 -10  -2   45.95    2.00
 -10  -9  -5  178.81    2.10
 -10  -8  -8  141.38    2.41
 -10  -7 -22  100.13    4.47
 -10  -7 -15    6.07    2.23
  -9 -17   8    9.80    2.22
  -9 -15   7   35.47    2.15
  -9 -14   6    0.96    1.58
  -9 -13   5    9.82    1.61
  -9 -12   4    8.57    1.60
  -9 -11   3   61.91    2.03
  -9 -10   1    2.16    1.55
  -9  -9  -1   26.55    1.63
  -9  -6 -12    4.93    2.14
  -8 -15   9    9.98    2.05
  -8 -14   8    6.94    1.59
  -8 -10   4  146.63    1.89
  -8  -5 -11   40.16    2.15
  -7 -17  11   22.13    1.88
  -7 -16  11   40.12    1.91
  -7 -14  10    3.76    1.61
  -7  -9   5  151.51    2.16
  -7  -8   3  343.23    2.39
  -7  -7   1   56.12    1.67
  -7  -5  -5   16.44    1.61
  -7  -4 -10  187.31    3.46
  -6 -15  12  108.48    2.08
  -6 -13  11    3.99    1.58
  -6  -9   7   38.99    1.57
  -6  -5  -1   67.84    1.92
  -6  -3 -22   71.35    3.60
  -6  -3 -10   42.00    3.19
  -5 -14  13   96.95    1.98
  -5 -12  12   25.20    1.95
  -5 -11  11    0.41    1.53
  -5 -10  10   33.34    1.65
  -5  -9   9   75.75    1.70
  -5  -7   6   94.47    1.80
  -5  -5   2  675.32    3.37
  -5  -4 -32   14.07    2.76
  -4  -7   8  465.81    2.62
  -4  -3 -31    3.92    2.54
  -4  -1 -16   81.47    2.95
  -3 -13  15   48.95    1.84
  -3 -11  14   16.88    1.88
  -3 -10  13  309.24    2.29
  -3  -8  11    6.78    1.51
  -3  -7  10   15.24    1.90
  -3  -3   2   10.35    2.04
  -3  -2 -30    2.19    2.10
  -3  -1 -25   11.11    2.41
  -2 -13  16    0.46    1.70
  -2 -11  15   24.78    1.65
  -2  -6  10    0.29    1.54
  -2   0 -23   62.20    2.30
  -1 -13  17   37.81    2.21
  -1 -11  16   36.22    1.75
  -1  -5  10   14.88    1.62
  -1  -2   4   51.94    2.37
  -1  -1 -31   35.07    2.36
  -1  -1   1 1343.38    8.54
  -1   1 -19   11.66    1.99
  -1   1 -11    2.39    2.05
   0 -11  17   30.28    2.09
   0  -7  14    1.62    1.85
   0  -4  10    4.17    1.96
   0  -2   6    4.18    2.35
   0   0 -29   50.96    2.36
   0   1 -24   74.26    2.29
   1 -12  18   20.27    1.84
   1  -7  15   95.51    2.10
   1   0 -31   -1.52    2.31
   1   1 -27    3.73    2.10
   1   2 -20   15.98    1.97
   1   2  -8  301.45    2.89
   2 -10  18   30.58    2.11
   2  -2   9   36.06    2.28
   2   1 -29   12.42    1.86
   2   2 -24    6.37    1.66
   3  -9  18    1.24    2.00
   3   1 -30   -0.63    2.25
   3   2 -26   31.98    2.19
   3   2  -1  415.92    3.62
   3   3 -19   20.24    1.97
   3   3  -8  143.31    2.61
   4 -10  19   33.31    2.22
   4   2   1  278.59    3.19
   4   3 -22    6.27    2.11
   4   3  -4  404.71    2.99
   5  -5  16  208.76    2.98
   5   2 -29   19.36    1.97
   5   3 -24   47.68    2.21
   5   4 -16  142.70    2.00
   5   4 -15   52.16    1.77
   5   4 -14   95.77    1.90
   5   4 -13    5.27    1.63
   5   4 -12   51.68    1.74
   5   4 -11   -1.25    1.62
   5   4 -10    1.41    1.61
   6  -7  18  100.14    2.81
   6   3 -25    4.40    2.21
   6   3   0   89.84    2.54
   6   4 -19   56.70    1.83
   6   4 -18   38.78    2.08
   6   4  -6  328.37    2.47
   7   3 -26    1.88    2.32
   7   4 -21   29.45    1.81
   7   4 -20    2.65    2.05
   7   4  -4   11.73    1.66
   8  -8  19    6.88    2.89
   8   4 -22   28.35    1.83
   8   4  -2  726.26    3.25
   9   2   6  382.58    3.50
   9   3   3  110.31    2.41
   9   4 -22   97.82    2.10
   9   4  -1  388.33    2.66
   9   5 -12  135.78    2.00
   9   5 -11  570.65    2.92
  10   4 -22   10.71    2.37
  10   5 -15  113.66    2.04
  10   5 -14    6.91    1.72
  10   5 -13  339.62    2.54
  10   5 -12   53.77    1.79
  10   5 -11  325.97    2.48
  10   5 -10  136.04    2.02
  10   5  -9  128.69    1.98
  11   4 -22    2.59    1.94
  11   4   0    7.55    1.66
  11   5 -15   53.64    1.91
  11   5 -14  271.45    2.43
  11   5 -13   38.88    1.83
  11   5 -12  150.60    2.12
  11   5 -11   14.20    1.76
  11   5 -10   20.54    1.73
  11   5  -9    1.51    1.65
  11   5  -8   11.94    1.68
  12   5 -14  151.57    2.15
  12   5 -13   13.80    1.80
  12   5 -12   26.07    1.84
  12   5 -11    6.78    1.75
  12   5 -10    0.90    1.75
  12   5  -9   51.14    1.89
  12   5  -8   26.66    1.76
  13  -2  13   44.17    3.42
  13   2   6   41.02    2.29
  13   3   3    1.17    2.10
  13   4  -1  158.83    2.44
  13   5 -11   60.20    1.99
  13   5 -10   24.69    1.84
  14   4  -2   12.31    2.19
  15   0   9   66.23    2.61
  15   1   7    9.33    2.26
  15   4  -4   77.13    2.54
  15   4  -3   33.08    1.91
  16   0   8   10.60    2.41
  16   1   6    5.08    2.41
  16   3   0   17.73    2.42
  16   4 -10   10.27    2.51
  16   4  -8   26.43    2.53
  16   4  -7    0.53    1.97
  16   4  -6   49.23    2.20
  17   2   2   10.34    2.05
  17   3  -3    0.20    2.51
  17   3  -2    0.00    2.08
 -14 -16  -7   24.28    1.90
 -14 -15  -9    0.75    1.84
 -14 -14 -12   66.84    2.05
 -14 -13 -21    7.92    2.43
 -14 -13 -20   43.82    2.59
 -14 -13 -19   21.40    2.38
 -14 -13 -18   12.57    2.38
 -14 -13 -17   12.18    2.34
 -13 -15  -4  111.24    2.09
 -13 -14  -6   59.92    1.96
 -13 -13  -8   26.72    1.81
 -13 -12 -11   88.06    2.36
 -12 -16   1    9.01    2.15
 -12 -13  -3   94.50    2.25
 -12 -11  -8   92.88    2.26
 -12 -10 -13    8.75    1.97
 -11 -17   4    8.46    1.78
 -11 -10  -6   35.88    1.73
 -11  -9 -10   14.23    1.58
 -10 -16   6   82.51    2.02
 -10 -15   5   -1.19    1.68
 -10 -13   3   11.10    1.63
 -10 -12   2  105.78    1.89
 -10  -9  -4  245.14    2.58
 -10  -7 -14    3.28    2.30
  -9 -16   8   69.85    2.01
  -9  -8  -3  139.86    1.87
  -9  -7  -6  233.26    2.52
  -8 -17  10    0.32    1.79
  -8 -13   8   28.72    1.64
  -8 -12   7   -1.50    1.55
  -8  -7  -2   61.45    1.82
  -8  -6  -5   11.39    1.99
  -7 -15  11   46.72    1.81
  -7 -12   9   61.66    1.70
  -7 -11   8   66.25    1.72
  -7  -6  -1  153.71    2.35
  -6 -14  12   88.10    1.94
  -6  -8   6    4.58    1.51
  -6  -7   4  328.70    2.35
  -6  -6   2    3.23    1.72
  -6  -5 -32   31.96    3.23
  -5 -16  14   -0.74    1.73
  -5 -13  13   51.21    2.06
  -5  -8   8    2.03    1.53
  -5  -2 -20   95.06    3.34
  -4 -15  15   16.37    1.82
  -4 -13  14   28.53    1.73
  -4 -11  13   21.34    1.92
  -4 -10  12   41.27    1.65
  -4  -9  11   26.62    1.53
  -3 -15  16   14.97    1.85
  -3  -5   7  487.50    3.15
  -3  -3 -33    7.79    2.70
  -3  -2  -1  368.71    3.85
  -2 -12  16   79.41    2.23
  -2  -2 -32    0.98    2.26
  -2  -1 -28   96.35    2.55
  -2   0 -22    6.77    2.06
  -1  -9  15    2.30    1.89
  -1  -8  14    0.78    1.58
  -1  -7  13    3.02    1.85
  -1   0 -26   12.19    2.07
  -1   1 -18   61.61    2.12
  -1   1 -17  179.31    2.65
  -1   1 -12   14.01    2.06
   0 -13  18    2.44    2.17
   0  -9  16   90.99    2.10
   0  -8  15    0.32    1.57
   0  -6  13  206.29    2.44
   0  -1 -32    5.37    2.30
   0   1 -23    8.93    1.95
   0   1  -5  440.13    4.42
   1  -8  16  176.18    2.15
   1  -6  14   50.96    1.75
   1   1 -26   40.06    2.21
   1   2 -19   86.26    2.27
   1   2  -9  544.30    3.68
   2 -12  19    3.56    2.20
   2  -7  16   22.95    2.00
   2  -6  15  154.44    2.42
   2  -3  11  240.97    3.12
   2   1 -28    4.20    2.19
   2   2 -23    0.09    2.03
   2   2  -4  952.47    4.81
   3 -11  19   56.23    2.06
   3  -3  12    8.84    2.28
   3   2 -25   15.18    2.14
   3   3 -18   66.86    1.88
   3   3 -17   47.69    2.08
   3   3  -9   17.66    1.83
   4  -8  18   96.83    2.32
   4   2 -27   24.33    1.88
   4   3 -21  146.48    2.40
   5  -9  19   47.19    2.29
   5  -6  17    1.11    2.16
   5  -4  15   15.49    2.48
   5   2 -28    2.31    1.83
   5   3 -23   15.18    2.11
   5   3  -2  771.99    3.78
   6   3 -24   12.07    2.21
   6   4 -17  170.99    2.14
   6   4 -16   65.82    2.19
   6   4  -8  204.24    2.47
   6   4  -7   38.48    1.76
   7  -8  19    0.75    2.44
   7   3 -25    6.13    2.25
   7   3   1  998.03    4.39
   7   4 -19  127.23    2.07
   7   4  -5  148.69    2.36
   8   1   8   77.22    2.64
   8   3 -26    4.16    1.91
   8   3   2   40.36    2.18
   8   4 -21   28.19    1.83
   8   4 -20   95.53    2.35
   8   4  -3   46.07    1.77
   9  -8  19   14.31    3.01
   9   4 -21   10.13    1.83
   9   4  -2  804.35    3.43
  10   3   3  485.76    3.28
  10   4 -21   29.55    1.94
  10   4  -1  386.20    2.57
  11   3   3  122.91    2.39
  11   4 -21    0.55    1.91
  11   4  -1    1.48    1.69
  12  -1  12    8.15    3.00
  12   2   6   84.63    2.37
  12   3   3    2.62    2.11
  12   4 -20   30.16    2.05
  12   4  -1    1.61    1.56
  13  -3  14    0.34    3.60
  13   0  10   76.01    2.79
  13   1   8  142.36    2.90
  13   4  -2   10.08    2.07
  14  -1  11    1.16    2.53
  14   2   5   87.88    2.46
  14   3   2   54.27    2.31
  14   4  -3  161.09    2.24
  15   2   4   34.58    2.37
  15   3   1   17.30    1.89
  15   4 -12   21.09    2.38
  15   4  -7    7.35    2.31
  15   4  -6   31.25    2.35
  15   4  -5   31.77    2.01
  16  -1   9   15.43    2.83
  16   2   3    3.35    1.97
  16   3  -1    0.66    1.92
  17   1   4    4.87    2.44
  17   2   1   27.26    2.13
 -14 -17  -5   40.49    2.12
 -14 -16  -6    0.78    1.91
 -14 -15  -8    3.23    1.85
 -14 -14 -11    6.62    1.82
 -14 -13 -16    1.31    2.28
 -13 -17  -1   10.57    1.95
 -13 -16  -2   38.93    1.92
 -13 -15  -3    5.48    2.19
 -13 -14  -5    3.26    1.71
 -13 -13  -7    6.77    2.08
 -13 -11 -21   65.55    2.98
 -13 -11 -20    1.37    2.55
 -13 -11 -19  184.39    3.07
 -13 -11 -18    7.30    2.20
 -13 -11 -17  215.43    3.31
 -12 -17   2    8.05    1.80
 -12 -15   0    7.07    1.77
 -12 -14  -1    1.62    1.69
 -12 -12  -5   13.84    1.67
 -12 -10 -12  100.08    2.33
 -11 -16   4    0.29    1.74
 -11 -15   3  118.87    2.06
 -11 -14   2   50.99    1.77
 -11 -13   1   13.93    1.65
 -11 -11  -3   58.12    1.79
 -11  -9  -9  265.77    2.67
 -10 -17   7   59.98    2.10
 -10 -14   5    7.21    2.01
 -10 -11   1    0.75    1.96
 -10 -10  -1   98.75    2.20
 -10  -8  -7  119.72    2.27
 -10  -7 -13    0.12    2.28
  -9 -17   9    0.58    1.80
  -9 -15   8   95.10    2.29
  -9 -14   7   12.51    1.62
  -9 -13   6    2.92    1.59
  -9 -12   5   -0.37    1.55
  -9 -10   2   21.59    1.63
  -9  -9   0   10.30    1.61
  -9  -6 -11  192.88    2.68
  -8 -16  10    3.90    1.73
  -8 -14   9   61.82    1.83
  -8 -11   6   20.23    1.55
  -8  -9   3  166.04    1.95
  -8  -8   1  284.30    2.30
  -8  -5 -10  743.00    4.48
  -7 -14  11    1.89    1.98
  -7 -13  10   40.84    1.70
  -7 -10   7   91.13    1.78
  -7  -8   4  287.05    2.28
  -6 -16  13    0.49    1.74
  -6 -15  13   19.10    2.18
  -6 -12  11    1.76    1.53
  -6 -11  10   43.19    1.64
  -6 -10   9  264.10    2.14
  -6  -4 -28   -0.08    2.67
  -6  -4  -4   23.04    1.75
  -5 -15  14    1.61    1.73
  -5  -3 -27    5.82    2.67
  -5  -3  -4  672.93    4.44
  -4 -14  15    8.37    1.71
  -4 -12  14    8.86    1.95
  -4  -8  10  130.31    1.86
  -4  -6   7  148.12    2.00
  -4  -5   5    6.37    1.72
  -4  -2 -26    5.93    2.37
  -3 -14  16   78.57    1.99
  -3 -12  15   10.27    1.69
  -3  -6   9  246.64    2.48
  -3  -4   5    3.65    1.77
  -3  -2 -29   11.62    2.49
  -3  -1 -24   29.42    2.42
  -2 -14  17   47.93    1.91
  -2 -10  15    4.36    1.88
  -2  -9  14  283.08    2.30
  -2  -8  13   70.80    1.76
  -2  -7  12   16.84    1.88
  -2  -5   9  372.79    2.88
  -2  -4   7   86.73    2.04
  -2  -2   2   44.69    2.56
  -2   0 -21   38.49    2.38
  -1 -12  17    0.51    1.65
  -1 -10  16   26.49    2.00
  -1  -6  12  133.52    2.21
  -1  -1 -30   10.43    2.21
  -1   1 -16  105.20    2.46
  -1   1 -15  253.69    2.91
  -1   1 -14  116.61    2.45
  -1   1 -13   37.62    2.05
   0 -12  18    3.74    2.06
   0 -10  17   41.09    2.09
   0   0 -28   80.44    2.43
   1 -13  19   23.53    2.31
   1  -9  17    0.53    1.93
   1  -5  13  314.51    2.91
   1   0 -30   58.51    2.05
   1   2 -18    4.09    1.65
   1   2 -17  272.03    2.67
   2  -8  17   52.98    2.08
   2  -5  14    4.10    1.95
   2  -1   7    0.88    2.67
   2   0 -31   18.37    2.43
   2   2 -22   57.37    2.16
   3 -10  19   75.24    2.36
   3  -7  17    4.65    2.18
   3  -6  16  383.98    3.13
   3  -5  15   65.95    2.40
   3   1 -29    1.44    1.86
   3   3 -16  154.18    2.00
   3   3 -15   65.28    1.75
   3   3 -14   65.51    2.17
   3   3 -12   67.94    2.16
   3   3 -11  163.23    2.19
   3   3 -10  211.06    2.33
   4  -3  13   19.05    2.19
   4   2 -26   45.40    1.92
   4   3 -20   10.31    1.69
   4   3  -5  924.65    3.93
   5  -7  18   11.76    2.28
   5   2 -27   36.84    2.34
   5   3 -22   -1.73    1.72
   6  -8  19   58.44    2.68
   6   2 -28   17.26    1.94
   6   4 -15  232.21    2.19
   6   4 -14   24.45    1.66
   6   4 -13   67.99    2.15
   6   4 -11    4.69    1.96
   6   4 -10   63.90    1.80
   6   4  -9    8.73    1.64
   7  -5  17   66.02    2.90
   7  -4  16    4.00    2.97
   7   3 -24   14.24    2.23
   7   4 -18   10.12    1.66
   7   4 -17  265.08    2.67
   7   4  -6    9.71    1.71
   8  -6  18    6.33    2.89
   8   3 -25   15.98    1.89
   8   4 -19   23.89    1.83
   8   4  -4   62.48    1.85
   9  -6  18    2.79    3.27
   9   3 -25   13.69    1.94
   9   4 -20   77.72    1.97
   9   4  -3  101.35    2.35
  10  -6  18   48.64    5.29
  10   2   6   37.74    2.13
  10   4 -20    4.69    1.79
  10   4  -2   27.20    1.77
  11   2   6   54.38    2.13
  11   4 -20    5.34    1.91
  11   4 -19   24.28    1.95
  11   4  -2    6.38    1.68
  12   4 -19    2.56    1.87
  12   4 -18   61.23    2.09
  12   4  -2    4.61    1.69
  13   3   2    1.03    2.08
  13   4 -18    7.03    2.02
  13   4 -17   10.22    1.99
  13   4  -3   73.55    1.98
  14   3   1    7.26    2.24
  14   4 -16   -0.03    1.96
  14   4 -15   17.92    2.03
  14   4 -14    2.40    2.37
  14   4  -5   86.04    2.02
  14   4  -4   12.36    1.79
  15  -1  10   12.89    2.80
  15   3   0   14.69    1.90
  15   4 -11    2.13    1.93
  15   4 -10    1.59    1.94
  15   4  -9    0.96    1.89
  15   4  -8    8.17    1.95
  16   1   5    2.89    2.37
  16   2   2   73.27    2.68
  16   3  -3   -1.59    2.35
  16   3  -2    8.47    2.00
  17   2   0   19.26    2.16
 -15 -16 -11   12.33    1.96
 -15 -15 -15    1.67    2.40
 -15 -15 -14    0.95    2.38
 -14 -17  -4    8.26    2.02
 -14 -16  -5  132.89    2.68
 -14 -15  -7    8.08    1.86
 -14 -14 -10   33.40    1.94
 -14 -13 -14    2.17    2.19
 -13 -17   0    5.29    1.83
 -13 -16  -1    1.37    2.19
 -13 -14  -4   53.03    2.21
 -13 -12 -10   85.25    1.99
 -13 -12  -9  171.79    2.52
 -13 -11 -23    3.00    2.98
 -13 -11 -22    0.51    2.66
 -13 -11 -16   17.79    2.21
 -13 -11 -15   58.05    2.34
 -12 -17   3   -0.07    2.26
 -12 -16   2   57.56    1.96
 -12 -15   1   11.54    1.76
 -12 -13  -2    1.83    1.62
 -12 -12  -4   40.20    1.80
 -12 -11  -7   27.57    1.66
 -12 -10 -26   23.62    3.82
 -12 -10 -11    2.60    2.09
 -11 -17   5   47.38    2.03
 -11 -15   4    9.22    2.14
 -11 -14   3   73.52    2.24
 -11 -11  -2  278.27    2.63
 -11 -10  -5   52.94    1.65
 -11  -9  -8   19.30    1.95
 -11  -8 -20   -0.57    2.53
 -11  -8 -19   60.96    2.72
 -11  -8 -18    2.62    2.30
 -11  -8 -17   24.74    2.45
 -11  -8 -16   21.74    2.37
 -11  -8 -15    2.53    2.29
 -10 -16   7   53.84    1.99
 -10 -15   6   11.59    1.72
 -10 -13   4   63.08    1.79
 -10 -12   3  193.46    2.02
 -10  -9  -3   66.32    2.12
 -10  -7 -23   37.14    5.14
 -10  -7 -12  112.22    2.70
  -9 -16   9    1.72    1.79
  -9 -11   4  110.32    1.87
  -9  -8  -2  111.30    1.82
  -9  -7  -5  159.22    2.27
  -8 -15  10   -1.30    1.69
  -8 -10   5   71.12    1.74
  -8  -7  -1  239.00    2.26
  -7 -16  12   12.89    1.83
  -7 -15  12  140.02    2.45
  -7  -9   6   69.10    1.69
  -7  -7   2  548.75    2.77
  -7  -6 -32   12.24    3.06
  -7  -5  -4  386.38    2.81
  -7  -4  -9  368.30    3.81
  -6 -13  12    0.27    1.60
  -6  -9   8   62.44    1.68
  -6  -7   5  150.83    2.29
  -6  -5   0    2.48    1.79
  -6  -3 -21  218.38    4.46
  -5 -14  14   11.24    1.71
  -5 -12  13    7.68    1.55
  -5 -11  12   93.30    1.78
  -5 -10  11    5.52    1.54
  -5  -9  10    9.99    1.52
  -5  -7   7  587.89    2.80
  -5  -6   5   32.55    1.64
  -5  -5   3  272.88    2.79
  -5  -4 -31   15.38    2.70
  -5  -4   0   33.39    1.95
  -5  -2 -19    2.10    2.78
  -4 -13  15    2.09    2.01
  -4  -7   9  146.11    1.99
  -4  -4   3  840.43    3.99
  -3 -13  16   36.87    1.78
  -3 -10  14   17.37    1.64
  -3  -9  13   47.48    1.61
  -3  -8  12   79.46    1.74
  -2 -13  17  181.78    2.33
  -2 -11  16   74.03    2.16
  -2  -3   5    4.02    2.27
  -2  -2 -31    2.46    2.26
  -2  -1 -27   51.67    2.40
  -2   0  -8    8.77    3.04
  -1 -14  18    2.18    1.82
  -1 -13  18   14.38    2.18
  -1 -11  17   61.16    2.25
  -1  -4   9  341.02    3.07
  -1   0 -25   87.62    2.37
   0  -5  12  342.26    2.60
   0  -1 -31   68.00    2.59
   0   1 -22   13.86    1.65
   1 -12  19   22.91    2.26
   1 -10  18   13.02    2.01
   1  -3  10  208.06    2.74
   1  -2   8  117.71    2.71
   1   1 -25    8.16    1.68
   1   2 -16   56.94    1.77
   1   2 -15  152.44    2.46
   1   2 -12    4.37    2.07
   1   2 -11  282.39    2.97
   1   2 -10   77.78    2.14
   2 -11  19    3.83    2.07
   2  -9  18    0.90    1.94
   2   1 -27   -0.07    1.68
   2   2 -21   63.49    2.26
   3  -8  18   41.24    2.11
   3   1 -28    4.52    2.20
   3   2 -24  107.89    2.04
   3   3 -13   91.29    1.95
   4 -11  20    3.92    2.17
   4  -9  19    6.74    2.02
   4   2 -25   87.94    2.43
   4   3 -19   18.75    1.57
   4   3  -6    1.05    1.81
   5   2   2  101.72    2.64
   5   3 -21    8.11    1.62
   5   3  -3   39.18    1.95
   6 -10  20    4.27    2.20
   6  -2  13   61.00    4.33
   6   2 -27    4.06    1.84
   6   3 -23    2.13    1.77
   6   3  -1   36.79    1.96
   6   4 -12   -0.49    1.63
   7  -6  18   38.15    2.83
   7   3 -23   22.27    2.22
   7   4 -16   26.88    1.76
   7   4 -15  176.21    2.15
   7   4  -7  270.25    2.27
   8   0  10   17.64    2.84
   8   2   5  278.37    3.11
   8   3 -24    1.94    1.77
   8   4 -18   91.39    1.95
   8   4 -17   38.94    1.80
   8   4  -5    2.25    1.71
   9   3 -24   41.00    1.99
   9   3   2   61.66    1.83
   9   4 -19    7.01    1.77
   9   4 -18   18.77    1.75
   9   4  -4  264.50    2.66
  10   3 -24   24.57    2.02
  10   4 -19   -0.03    1.80
  10   4 -18   -1.03    1.74
  10   4  -3  279.94    2.39
  11  -1  12    3.92    2.85
  11   4 -18   13.61    1.81
  11   4  -3  133.07    1.98
  12   0  10    4.38    2.64
  12   1   8   33.87    2.46
  12   3   2   97.75    2.35
  12   4 -17    8.29    1.91
  12   4 -16   40.19    2.33
  12   4  -3   10.23    1.75
  13   2   5   80.58    2.28
  13   4 -16    7.13    1.95
  13   4 -15    2.04    1.87
  13   4 -14    4.34    2.28
  13   4  -5   28.14    1.83
  13   4  -4    1.53    1.73
  14  -2  12   53.62    3.21
  14   0   9    2.22    2.18
  14   1   7   24.77    2.28
  14   2   4    3.75    2.13
  14   4 -13   40.66    1.97
  14   4 -12    8.68    1.92
  14   4 -11   16.12    1.91
  14   4 -10    4.46    1.88
  14   4  -9    1.96    1.84
  14   4  -8    0.56    1.82
  14   4  -7   18.35    1.91
  14   4  -6    3.54    1.81
  15   0   8   50.26    2.49
  15   1   6    3.95    2.28
  15   2   3   46.61    2.43
  15   3  -1    9.80    1.85
  16   0   7   45.71    2.29
  16   2   1    0.99    2.43
  16   3  -5    1.98    2.47
  16   3  -4   78.54    2.25
  17   2  -1   35.95    2.27
 -15 -16 -10   36.64    2.06
 -15 -15 -13   24.13    2.50
 -14 -17  -3   25.88    2.06
 -14 -16  -4    1.82    2.28
 -14 -15  -6    8.78    1.82
 -14 -14  -9    1.63    1.80
 -14 -13 -13   14.78    1.89
 -14 -13 -12   37.04    2.37
 -13 -15  -2   88.05    2.06
 -13 -11 -14    2.31    2.07
 -13 -11 -13    5.20    2.10
 -12 -14   0   12.35    1.68
 -12 -11  -6    4.58    1.56
 -12 -10 -10  250.22    2.65
 -11 -17   6   12.33    1.91
 -11 -16   5    7.48    1.80
 -11 -13   2  167.47    2.04
 -11 -10  -4  128.79    1.98
 -11  -8 -21   38.90    3.25
 -11  -8 -14    3.53    2.30
 -10 -17   8    2.27    1.85
 -10 -14   6   16.23    1.71
 -10 -11   2    2.75    1.56
 -10 -10   0   25.06    1.59
 -10  -8  -6   11.16    1.64
 -10  -7 -11    0.97    2.27
  -9 -17  10    0.12    1.78
  -9 -15   9   27.75    2.10
  -9 -14   8   19.31    1.69
  -9 -13   7    4.05    1.59
  -9 -12   6   27.96    1.66
  -9 -10   3    0.31    1.56
  -9  -9   1   53.69    1.68
  -9  -6 -10    0.88    1.91
  -8 -16  11   43.93    1.93
  -8 -14  10    2.32    1.68
  -8 -13   9    8.35    1.62
  -8 -12   8  205.56    2.06
  -8 -11   7   21.85    1.61
  -8  -9   4    6.08    1.53
  -8  -8   2   70.79    1.81
  -8  -6  -4  377.76    2.72
  -8  -5  -9    9.77    2.00
  -7 -13  11    2.18    1.61
  -7 -12  10    8.08    1.60
  -7 -11   9  350.23    2.32
  -7 -10   8    1.12    1.94
  -7  -6   0   83.50    1.89
  -7  -5 -28   26.81    3.23
  -7  -4 -22   69.86    4.20
  -6 -16  14    4.30    1.78
  -6 -14  13   82.28    1.92
  -6 -11  11    2.73    1.56
  -6  -8   7    0.38    1.52
  -6  -6   3  328.19    2.42
  -6  -3  -9  130.43    3.49
  -5 -15  15    5.18    1.79
  -5 -13  14   15.79    1.65
  -5  -8   9  107.14    1.75
  -4 -15  16   17.02    1.83
  -4 -11  14   47.56    2.11
  -4 -10  13  329.07    2.28
  -4  -9  12    2.09    1.59
  -4  -3   0  157.00    2.57
  -4  -2 -25   25.58    2.46
  -3 -11  15    4.44    1.58
  -3  -7  11    4.66    1.53
  -3  -3 -32    1.96    2.25
  -3  -1 -23    8.91    2.08
  -2  -6  11    0.75    1.51
  -2   0 -20    1.46    1.97
  -1  -5  11    1.34    1.91
  -1  -3   7  326.70    2.91
  -1  -1 -29  122.64    2.66
  -1   0 -24    2.10    1.96
   0 -13  19    1.12    2.24
   0 -11  18   19.16    1.77
   0   0 -27   35.33    1.84
   0   1 -21   11.81    1.97
   1  -1 -32   57.56    2.65
   1   0 -29    2.95    1.82
   1   1 -24    9.06    2.10
   1   1  -2   26.36    2.97
   1   2 -14   31.18    1.71
   1   2 -13    1.45    1.72
   2  -4  13  120.15    2.34
   2   0 -30    7.70    2.25
   2   1 -26   12.43    2.18
   2   2 -20  181.94    2.53
   2   2  -5   80.06    2.31
   3   0 -31    6.89    2.39
   3   2 -23   10.69    1.66
   3   2  -2  128.45    2.65
   4  -6  17  128.86    2.69
   4   1 -29    3.21    1.91
   4   1   4  190.39    4.24
   4   3 -18   83.64    1.84
   4   3 -17    4.44    1.65
   4   3  -7  516.77    3.10
   5 -10  20    2.34    2.17
   5  -8  19   99.66    2.57
   5   0   8    0.35    4.42
   5   3 -20   44.73    1.84
   6   2 -26   13.85    2.31
   6   2   3  207.07    2.97
   6   3 -22   40.84    1.83
   6   3 -21   21.15    2.15
   7   1   7  357.50    4.25
   7   2 -27    2.16    1.94
   7   2   4  122.55    2.51
   7   3 -22   31.97    2.23
   7   3   0   64.37    2.04
   7   4 -14   18.58    1.73
   7   4 -13   22.56    1.69
   7   4 -12   -1.01    1.60
   7   4 -11   45.88    1.71
   7   4 -10   21.83    1.66
   7   4  -9   64.43    1.79
   7   4  -8    3.94    1.69
   8   3 -23   64.63    1.99
   8   3   1  113.79    2.07
   8   4 -16   27.30    1.76
   8   4 -15    5.20    1.67
   8   4  -7   21.00    2.05
   8   4  -6   47.33    1.81
   9  -1  12    2.83    3.39
   9   1   8  277.54    3.36
   9   3 -23   10.66    1.90
   9   4 -17   10.92    1.74
   9   4 -16   11.71    1.73
   9   4  -5   36.99    1.82
  10  -1  12   40.15    3.57
  10   1   8   77.22    2.62
  10   3 -23    1.31    1.90
  10   3   2   16.94    1.57
  10   4 -17   53.21    1.92
  10   4 -16    2.73    1.70
  10   4  -4   32.69    1.74
  11   1   8   38.53    2.46
  11   3 -22    0.91    1.95
  11   3   2  139.82    2.13
  11   4 -17   66.39    1.99
  11   4 -16   18.71    1.82
  11   4 -15   90.48    2.34
  11   4  -5  224.51    2.46
  11   4  -4   62.28    1.84
  12  -2  13   12.41    3.31
  12   2   5   15.01    2.21
  12   4 -15    5.47    1.83
  12   4 -14    3.22    1.81
  12   4  -6  104.36    2.32
  12   4  -5   29.89    1.81
  12   4  -4   64.48    1.88
  13  -1  11   70.06    3.17
  13   3   1   60.87    1.87
  13   4 -13   23.93    1.89
  13   4 -12    0.94    1.90
  13   4 -11   46.69    1.89
  13   4 -10    1.10    1.75
  13   4  -9   21.50    1.77
  13   4  -8    7.80    1.79
  13   4  -7   -0.86    1.74
  13   4  -6    7.52    1.81
  14  -3  13    5.37    3.40
  14   3  -1  106.98    2.47
  14   3   0   39.71    1.88
  15  -2  11    1.10    2.80
  15   2   2   48.77    2.44
  15   3  -3   73.93    2.48
  15   3  -2   33.12    2.00
  16  -1   8    4.71    2.88
  16   0   6    2.20    2.80
  16   1   4    2.62    1.97
  16   2   0  100.54    2.80
  16   3  -9    1.02    1.98
  16   3  -8   29.12    2.17
  16   3  -7    3.24    1.95
  16   3  -6   71.65    2.28
 -15 -16  -9    9.97    2.00
 -15 -15 -12    0.47    1.91
 -14 -17  -2    0.76    1.93
 -14 -15  -5   25.64    2.28
 -14 -14  -8    2.27    1.71
 -14 -13 -11   45.39    2.38
 -13 -17   1   40.60    2.04
 -13 -16   0    2.64    1.85
 -13 -15  -1    4.02    1.77
 -13 -14  -3   18.36    1.80
 -13 -13  -5    4.94    1.71
 -13 -12  -8   62.33    1.95
 -13 -11 -24    0.33    2.98
 -13 -11 -12    2.82    2.03
 -12 -17   4    0.39    1.83
 -12 -16   3    6.79    1.77
 -12 -15   2   20.48    1.78
 -12 -14   1   11.55    1.71
 -12 -13  -1    0.81    1.61
 -12 -12  -3  143.80    2.08
 -12 -11  -5    4.23    1.99
 -12 -10  -9   25.88    2.07
 -11 -16   6    0.17    2.16
 -11 -15   5   20.68    1.76
 -11 -14   4   85.33    1.91
 -11 -12   1    3.42    1.60
 -11 -11  -1   78.03    1.81
 -11  -9  -7   65.10    1.77
 -11  -8 -22   -0.10    3.39
 -11  -8 -13   45.43    2.16
 -10 -16   8   83.10    2.02
 -10 -15   7   10.50    1.71
 -10 -13   5   15.63    1.66
 -10 -12   4   60.50    1.81
 -10  -9  -2  216.55    2.19
  -9 -16  10    1.66    1.79
  -9 -11   5  124.32    1.84
  -9  -8  -1   59.89    1.73
  -9  -7  -4    0.94    1.86
  -9  -6  -9  168.32    2.57
  -8 -15  11   47.08    1.89
  -8 -10   6  102.32    1.83
  -8  -7   0    1.97    1.93
  -7 -16  13   19.33    1.81
  -7 -14  12   66.88    1.89
  -7  -8   5  138.99    1.90
  -7  -7   3  140.00    1.97
  -7  -5  -3   24.88    2.10
  -6 -15  14   45.90    1.85
  -6 -13  13   22.38    1.65
  -6 -12  12    6.34    1.55
  -6 -10  10  198.33    2.02
  -6  -9   9    1.89    1.50
  -6  -5 -31   23.57    3.15
  -6  -4  -3  637.65    3.88
  -5 -14  15    1.27    1.76
  -5 -11  13   31.14    1.92
  -5 -10  12   78.29    2.07
  -5  -3 -26   51.87    2.94
  -5  -2 -18    9.98    2.63
  -4 -14  16   58.28    1.92
  -4 -12  15    1.97    1.55
  -4  -8  11   15.44    1.57
  -4  -6   8 1019.03    3.76
  -4  -2  -4   18.14    3.02
  -3 -14  17   15.68    1.82
  -3 -12  16    1.70    1.64
  -3  -5   8    1.62    2.03
  -3  -3   3  792.78    4.07
  -3  -2 -28   10.05    2.13
  -2 -14  18    1.46    1.80
  -2 -12  17   40.41    1.76
  -2  -9  15    0.26    1.91
  -2  -8  14   33.82    2.04
  -2  -2 -30   19.87    2.28
  -2  -1 -26   47.00    2.28
  -2   0 -19  314.10    3.01
  -1 -12  18   46.14    1.87
  -1  -9  16    0.64    1.49
  -1  -8  15   20.58    1.59
  -1  -7  14  123.09    2.19
  -1  -2 -32   14.75    2.36
   0  -9  17   97.21    2.32
   0  -8  16  223.42    2.25
   0  -7  15    2.01    1.53
   0  -1 -30   32.85    2.38
   0   0 -26   33.55    2.21
   0   1 -20  196.42    2.55
   0   1  -6  698.72    5.12
   1 -11  19   17.31    2.10
   1  -8  17   70.46    2.08
   1  -7  16   37.31    2.09
   1  -4  12  229.56    2.51
   1   0 -28   40.37    2.27
   2 -12  20   36.50    2.37
   2 -10  19    2.83    1.66
   2   2 -19  108.37    2.00
   3 -11  20   22.13    2.26
   3  -9  19   47.29    2.25
   3  -4  14   10.95    1.85
   3   1 -27   13.07    1.81
   3   2 -22  195.03    2.33
   4 -10  20   32.40    2.36
   4  -7  18    1.18    1.92
   4  -5  16    2.48    1.89
   4   1 -28   28.88    1.88
   4   2 -24   96.61    2.00
   4   2   0  141.29    2.53
   4   3 -16  104.08    1.92
   4   3 -15  120.15    2.05
   4   3  -8   15.66    1.81
   5  -3  14  319.79    4.11
   5   1 -29    8.85    1.88
   5   2 -25   62.60    1.93
   5   3 -19    4.58    1.64
   5   3  -4  786.26    3.66
   6  -9  20    1.25    2.49
   6  -6  18  128.98    3.13
   6  -5  17   15.38    2.60
   6   3 -20  162.76    2.42
   6   3  -2   33.71    1.95
   7  -9  20    1.31    2.56
   7  -7  19    2.03    2.68
   7  -3  15    1.54    3.52
   7   2 -26    0.36    1.89
   7   3 -21  135.30    2.15
   8  -7  19    7.76    2.79
   8   2 -26    0.17    1.91
   8   3 -22    4.34    1.81
   8   4 -14   -0.69    1.62
   8   4 -13   12.23    1.67
   8   4 -12   87.10    1.92
   8   4 -11   28.47    1.70
   8   4 -10  152.43    1.99
   8   4  -9    5.12    1.61
   8   4  -8  115.42    1.88
   9   0  10   42.69    3.04
   9   2   5   31.01    2.21
   9   3 -22   26.81    1.86
   9   3   1    1.48    1.61
   9   4 -15   43.11    1.80
   9   4 -14  125.46    2.02
   9   4 -13   44.16    1.80
   9   4  -7    1.07    1.64
   9   4  -6   32.56    1.76
  10   2   5   85.20    2.33
  10   3 -22    4.58    1.89
  10   3 -21    4.16    2.29
  10   3   1  189.78    2.50
  10   4 -15  170.72    2.18
  10   4 -14   25.18    1.79
  10   4 -13  170.76    2.50
  10   4  -7   47.53    2.15
  10   4  -6   39.49    1.76
  10   4  -5  225.01    2.27
  11   0  10   49.28    2.53
  11   2   5   19.17    2.12
  11   3 -21   12.33    1.95
  11   3   1  126.92    2.44
  11   4 -14   18.86    1.84
  11   4 -13   49.69    1.89
  11   4 -12    5.34    2.12
  11   4  -7  117.37    2.40
  11   4  -6   84.75    1.94
  12   3 -20   45.08    2.13
  12   3   1    0.73    1.77
  12   4 -13    4.59    1.78
  12   4 -12   27.38    1.87
  12   4 -11   16.01    1.79
  12   4 -10   71.71    1.98
  12   4  -9    2.23    1.73
  12   4  -8   66.77    1.90
  12   4  -7   13.88    1.74
  13   0   9   19.08    2.54
  13   1   7    1.49    2.15
  13   2   4    3.43    2.24
  13   3 -18   13.40    2.41
  13   3   0   51.57    1.87
  14   1   6   38.86    2.24
  14   2   3   70.69    2.48
  14   3  -2   -0.13    2.20
  15  -1   9   18.20    2.82
  15   1   5   56.36    2.52
  15   3 -13    4.10    2.03
  15   3 -12    0.59    2.28
  15   3  -6   25.29    2.43
  15   3  -5   60.11    2.62
  15   3  -4   66.40    2.16
  16   1   3   34.91    2.58
  16   2  -1    0.86    2.49
 -15 -16  -8   13.11    2.03
 -15 -15 -11   50.52    2.21
 -15 -15 -10    0.62    2.31
 -15 -14 -17   27.28    2.55
 -15 -14 -16    4.46    2.39
 -15 -14 -15    8.53    2.40
 -14 -16  -3  145.32    2.40
 -14 -14  -7    1.63    1.82
 -14 -13 -10  125.98    2.51
 -14 -12 -19    8.66    2.65
 -14 -12 -18  128.64    3.13
 -14 -12 -17   12.37    2.67
 -13 -17   2    6.28    1.90
 -13 -16   1   14.32    1.89
 -13 -14  -2   21.97    1.79
 -13 -13  -4   55.57    1.90
 -13 -12  -7  154.14    2.11
 -13 -11 -25    7.64    3.40
 -13 -11 -11   70.06    2.24
 -12 -16   4   21.09    2.25
 -12 -15   3   76.84    2.31
 -12 -13   0   12.08    1.68
 -12 -12  -2   75.72    1.95
 -12 -10 -27    3.05    4.55
 -12 -10  -8  130.94    2.29
 -12  -9 -19    7.58    2.69
 -12  -9 -18    0.50    2.68
 -12  -9 -17   21.92    2.46
 -12  -9 -16   31.02    2.49
 -11 -17   7   79.01    2.10
 -11 -13   3    9.17    1.68
 -11 -10  -3  206.86    2.16
 -11  -9  -6   84.24    2.16
 -11  -8 -12    1.11    2.07
 -10 -15   8   65.13    2.23
 -10 -14   7   11.09    1.68
 -10 -13   6    1.08    1.93
 -10 -11   3   64.99    1.75
 -10 -10   1   16.35    1.62
 -10  -8  -5   12.67    1.60
 -10  -7 -10  232.66    2.76
  -9 -15  10   22.68    2.16
  -9 -14   9   31.40    1.75
  -9 -13   8   -1.29    1.57
  -9 -12   7   37.59    1.67
  -9 -10   4   82.13    1.80
  -9  -9   2   55.44    1.70
  -9  -7 -28   10.64    4.69
  -8 -16  12    6.06    1.82
  -8 -14  11    9.23    1.70
  -8 -13  10   10.97    1.57
  -8 -12   9   18.20    1.64
  -8 -11   8  286.93    2.17
  -8  -9   5  113.19    2.11
  -8  -6 -28    1.38    3.35
  -8  -6  -3   10.23    1.98
  -8  -5  -8  380.98    3.31
  -7 -15  13   25.22    1.83
  -7 -13  12    3.01    2.00
  -7 -12  11    5.05    1.60
  -7 -11  10   25.63    1.64
  -7  -9   7   22.82    1.54
  -7  -4  -8   28.37    2.21
  -6 -14  14   41.65    1.87
  -6  -7   6   11.16    1.95
  -6  -5   1   23.79    1.81
  -6  -4 -27   11.20    2.49
  -6  -3 -20   89.74    3.70
  -5 -12  14   26.25    1.69
  -5  -9  11   31.21    1.65
  -5  -7   8    3.60    1.61
  -5  -6   6    6.73    1.55
  -5  -4 -30    1.97    2.51
  -5  -4   1   36.35    2.38
  -5  -3  -3   27.05    2.25
  -5  -2 -17    0.46    3.01
  -4 -15  17   20.41    2.26
  -4 -13  16    3.39    1.71
  -4  -7  10  222.43    2.42
  -4  -5   6    3.97    1.66
  -4  -3 -29    1.09    2.13
  -4  -2 -24   43.65    2.56
  -3 -13  17  111.08    2.07
  -3 -10  15   96.55    1.89
  -3  -9  14  377.41    2.51
  -3  -8  13   -0.04    1.84
  -3  -6  10  411.19    2.56
  -3  -4   6  148.95    2.25
  -3  -3 -31    1.01    2.48
  -3  -1 -22    0.61    1.93
  -2 -13  18   11.83    2.21
  -2 -11  17    4.46    2.00
  -2 -10  16    9.91    1.62
  -2  -7  13  140.31    2.21
  -2  -4   8  680.92    3.71
  -2   0 -18   10.16    1.93
  -1 -10  17   57.34    1.74
  -1  -6  13    2.15    1.80
  -1  -1 -28    2.06    2.14
  -1   0 -23    1.26    1.99
   0 -12  19    9.90    1.76
   0 -10  18   28.36    2.03
   0  -6  14   10.75    1.59
   0  -4  11  316.56    2.86
   0  -3   9  112.41    2.19
   0   1 -19   62.83    2.25
   1  -9  18   63.20    2.14
   1  -6  15    4.35    1.57
   1  -1 -31    3.45    2.33
   1   1 -23   16.56    1.77
   2  -8  18   45.00    2.10
   2  -7  17  153.99    2.41
   2  -6  16  134.84    2.33
   2   0 -29   16.36    1.88
   2   1 -25   65.61    1.88
   2   2 -18  219.06    2.32
   2   2  -6    1.28    1.91
   3   0 -30    1.45    1.88
   3   1 -26   81.20    2.41
   3   2 -21    0.37    1.67
   4  -8  19   26.99    2.11
   4  -4  15  140.90    2.82
   4   1 -27    1.57    2.23
   4   2 -23  152.61    2.22
   4   3 -14  127.39    2.01
   4   3 -13  160.92    2.12
   4   3 -12   48.53    1.76
   4   3 -11  117.58    1.97
   4   3 -10   19.67    1.75
   4   3  -9   75.90    1.95
   5  -9  20   18.92    2.48
   5   1 -28   13.00    1.92
   5   2 -24    0.50    1.78
   5   3 -18  147.21    1.97
   5   3 -17    1.92    1.62
   5   3  -5  215.47    2.48
   6  -7  19   34.25    2.81
   6  -4  16    0.87    2.67
   6   2 -25    2.39    1.72
   6   3 -19   63.08    1.86
   6   3  -3   48.97    2.38
   7   3 -20   26.78    1.81
   7   3  -1 1001.26    3.99
   8   2 -25   18.33    1.93
   8   3 -21  100.06    2.00
   8   3   0  303.08    2.59
   9  -7  19   21.82    3.43
   9   2 -25   18.63    2.03
   9   3 -21   32.05    1.91
   9   4 -12  363.76    2.51
   9   4 -11   38.55    1.78
   9   4 -10  431.71    2.67
   9   4  -9   11.31    1.74
   9   4  -8   92.11    1.90
  10   0  10  414.84    4.29
  10   3 -20    3.99    1.81
  10   4 -12   49.08    1.81
  10   4 -11  112.09    1.99
  10   4 -10   29.28    1.75
  10   4  -9   18.85    1.77
  10   4  -8    0.37    1.72
  11   3 -20    4.58    1.92
  11   4 -11    4.76    1.74
  11   4 -10   31.95    1.77
  11   4  -9   10.13    1.70
  11   4  -8   47.23    1.83
  12   2   4   26.12    2.18
  12   3 -19    2.90    1.95
  12   3 -18   46.51    2.50
  12   3   0  309.01    2.60
  13   3 -17    5.07    1.98
  13   3  -1  111.23    2.07
  14  -1  10   46.23    2.81
  14   0   8   60.23    2.55
  14   2   2   24.49    2.33
  14   3 -15   18.70    2.07
  14   3 -14   -0.09    1.91
  14   3  -4    6.91    2.27
  14   3  -3  146.44    2.23
  15   0   7   16.60    2.38
  15   1   4    0.57    2.35
  15   2   1   28.13    2.01
  15   3 -11    3.26    2.06
  15   3 -10    0.32    1.98
  15   3  -9    1.47    1.91
  15   3  -8    1.96    1.91
  15   3  -7   27.63    2.00
  16   0   5    8.87    2.44
  16   1   2   20.48    2.54
  16   2  -3    1.33    2.47
  16   2  -2   19.97    2.10
 -15 -16  -7    3.56    2.01
 -15 -15  -9   24.86    2.40
 -15 -14 -14    1.28    2.31
 -15 -14 -13    5.88    2.30
 -14 -16  -2    7.64    1.89
 -14 -15  -4   14.17    1.91
 -14 -14  -6    3.04    1.85
 -14 -13  -9   22.40    1.87
 -14 -12 -21    0.77    2.67
 -14 -12 -20  117.21    2.89
 -14 -12 -16   59.48    2.50
 -14 -12 -15    3.21    2.21
 -14 -12 -14    1.24    2.17
 -13 -15   0   24.40    1.81
 -13 -14  -1    0.77    2.04
 -13 -13  -3   72.50    2.24
 -13 -12  -6   18.87    1.70
 -13 -11 -10    1.72    2.03
 -12 -14   2    6.82    1.70
 -12 -11  -4   30.89    1.72
 -12 -10  -7   46.16    2.07
 -12  -9 -20    3.88    2.75
 -12  -9 -15   25.92    2.06
 -12  -9 -14   15.84    2.36
 -11 -16   7   51.59    1.96
 -11 -15   6    1.86    1.72
 -11 -14   5   22.48    1.78
 -11 -12   2  105.66    1.89
 -11 -11   0  169.50    2.04
 -11 -10  -2  102.68    2.22
 -11  -8 -11  216.92    2.72
 -10 -16   9   30.23    1.84
 -10 -12   5  106.16    1.87
 -10  -9  -1   22.27    1.67
 -10  -8  -4   47.14    2.10
 -10  -7  -9   28.01    2.05
  -9 -16  11    2.40    1.78
  -9 -11   6   17.35    1.58
  -9  -8   0    2.56    1.62
  -9  -7  -3  328.97    2.67
  -9  -6  -8    0.34    1.98
  -8 -15  12   12.18    1.78
  -8 -10   7    6.49    1.55
  -8  -8   3  797.54    3.10
  -7 -16  14    6.81    1.79
  -7 -14  13    1.46    1.68
  -7 -10   9  452.56    2.51
  -7  -8   6  108.64    2.07
  -7  -6   1  106.53    1.93
  -6 -15  15    2.87    1.69
  -6 -12  13    8.54    1.57
  -6 -11  12    1.84    1.61
  -6 -10  11   98.38    1.83
  -6  -8   8   66.95    1.72
  -6  -6   4   43.10    1.72
  -5 -15  16    0.93    1.78
  -5 -13  15   10.04    1.65
  -5  -8  10   34.26    1.63
  -5  -5   4  290.83    2.44
  -4 -14  17   10.96    2.15
  -4 -11  15    5.34    1.93
  -4 -10  14  107.78    1.92
  -4  -9  13  148.17    1.89
  -4  -4 -32    7.48    2.32
  -4  -4   4   36.30    2.30
  -3 -14  18   41.90    2.38
  -3 -11  16    1.91    1.59
  -3  -2 -27   12.02    2.09
  -3  -2   0   73.08    3.00
  -3  -1 -21   21.28    2.44
  -2  -5  10   61.00    1.81
  -2  -1 -25   51.43    2.35
  -2   0 -17  316.71    3.10
  -2   0  -9   51.44    2.92
  -1 -13  19    0.82    1.78
  -1 -11  18    3.73    1.65
  -1  -2 -31   22.56    2.36
  -1  -2   5   94.84    2.43
  -1   0 -22    4.98    2.01
   0  -1 -29  102.47    2.57
   0   0 -25    3.23    2.08
   0   1 -18  168.04    2.59
   1 -12  20   18.49    2.26
   1 -10  19   55.14    2.21
   1  -5  14    3.88    1.92
   1   0 -27    2.79    1.81
   1   1 -22   47.84    1.82
   2 -11  20   65.43    2.43
   2  -9  19    2.70    2.06
   2  -5  15   -0.10    1.91
   2   1 -24   19.60    1.77
   2   2 -17   69.97    1.81
   2   2 -16   96.52    2.16
   2   2  -7   16.22    1.92
   3 -10  20    0.41    2.11
   3   2 -20  227.36    2.26
   3   2  -3    9.05    2.12
   4   0 -30    2.32    1.90
   4   2 -22   41.76    1.85
   5  -6  18    4.85    2.50
   5   1 -27   16.51    2.23
   5   1   5  137.92    3.37
   5   2 -23   29.76    1.83
   5   2   1  115.13    2.75
   5   3 -16  245.63    2.29
   5   3 -15    8.44    2.01
   5   3  -6 1028.64    3.90
   6   1 -28    0.28    1.83
   6   1   6  345.85    4.15
   6   2 -24    0.61    1.75
   6   3 -18  274.81    2.43
   7   2 -24    8.48    1.82
   7   3 -19  238.31    2.35
   7   3  -2   60.89    2.31
   8   2 -24   -0.49    2.24
   8   2   4  251.42    2.93
   8   3 -20    5.46    1.76
   8   3 -19  151.22    2.15
   8   3  -1  313.29    2.89
   9   2 -24   20.66    1.95
   9   3 -20    6.25    1.78
   9   3 -19   35.58    2.26
   9   3   0   52.76    1.79
  10   3 -19   14.85    1.88
  10   3   0   19.55    1.69
  11   3 -19   21.48    1.96
  11   3 -18    2.22    1.81
  11   3   0   50.98    1.87
  12   1   7   81.91    2.37
  12   3 -17    7.09    1.91
  12   3  -1   32.90    1.90
  13   1   6  190.86    3.14
  13   2   3   22.63    2.15
  13   3 -15    0.45    1.96
  13   3  -3   19.46    2.22
  13   3  -2  119.83    2.12
  14   1   5   79.73    2.55
  14   3 -13   19.03    2.04
  14   3 -12    5.65    1.95
  14   3 -11   19.05    1.95
  14   3 -10    1.32    1.87
  14   3  -9    6.81    2.28
  14   3  -8    2.86    2.33
  14   3  -7   18.52    2.29
  14   3  -6   -0.98    1.93
  14   3  -5  111.72    2.13
  15   2  -1   12.49    2.36
  15   2   0   40.68    2.03
  16  -1   7   44.82    2.80
  16   2  -8   42.09    2.68
  16   2  -7    6.61    2.66
  16   2  -6   22.76    2.59
  16   2  -5    3.20    2.02
  16   2  -4    4.94    2.05
 -15 -16  -6    2.58    1.95
 -15 -15  -8    1.79    2.30
 -15 -14 -12    4.97    2.31
 -14 -16  -1   40.15    2.38
 -14 -15  -3   65.12    2.06
 -14 -14  -5    7.36    1.87
 -14 -13  -8   87.78    2.03
 -14 -12 -22   34.91    2.98
 -14 -12 -13    0.76    2.14
 -13 -17   3   33.64    2.01
 -13 -16   2   40.78    1.95
 -13 -15   1    0.20    1.74
 -13 -12  -5   17.75    2.12
 -13 -11  -9  177.00    2.56
 -12 -16   5    1.56    1.83
 -12 -15   4   26.17    1.83
 -12 -14   3   55.15    2.20
 -12 -13   1   24.52    1.72
 -12 -12  -1  166.22    2.11
 -12 -11  -3   27.48    2.07
 -12  -9 -21    2.46    3.00
 -12  -9 -13   18.12    2.03
 -11 -13   4  138.42    2.07
 -11 -11   1   57.04    2.10
 -11  -9  -5   49.78    1.77
 -11  -8 -23    1.84    3.63
 -11  -8 -10    1.07    2.02
 -10 -15   9    8.90    2.18
 -10 -14   8   13.87    1.69
 -10 -13   7   10.10    1.97
 -10 -11   4   -0.54    1.57
 -10 -10   2   -2.00    1.65
 -10  -7  -8  273.45    2.84
  -9 -14  10   34.89    1.81
  -9 -13   9   19.95    1.65
  -9 -12   8   88.53    1.85
  -9 -10   5   21.84    1.62
  -9  -9   3   26.86    1.63
  -8 -16  13   42.77    1.95
  -8 -13  11   11.82    1.68
  -8 -12  10   67.43    1.78
  -8  -7   1    2.46    1.59
  -8  -6  -2  493.13    3.16
  -8  -5  -7  174.93    2.62
  -7 -15  14   99.66    2.09
  -7  -9   8    1.97    1.57
  -7  -7   4  657.22    2.94
  -7  -6 -31    9.73    3.00
  -7  -5  -2  387.81    2.87
  -7  -4  -7  307.40    3.43
  -6 -13  14   29.98    1.76
  -6  -9  10  167.80    1.95
  -6  -4  -2   98.26    2.57
  -6  -3  -8   77.69    2.97
  -5 -14  16    3.30    1.71
  -5 -11  14  107.73    1.92
  -5 -10  13   32.91    1.62
  -5  -3 -25   18.92    2.43
  -5  -2 -16   48.72    3.39
  -4 -12  16    3.50    1.59
  -4  -8  12    0.31    1.53
  -4  -3 -28   23.87    2.54
  -4  -3   1  306.22    3.08
  -3 -12  17   60.03    1.84
  -3  -7  12   24.54    1.62
  -2 -12  18   42.86    1.87
  -2  -6  12    1.19    1.53
  -2  -3 -32    6.89    2.30
  -2  -3   6   20.76    2.23
  -2  -2 -29    1.57    2.11
  -2   0 -16   56.92    2.25
  -1  -4  10  115.52    2.16
  -1  -1 -27  100.68    2.46
   0 -13  20   18.93    1.95
   0  -5  13  102.52    1.86
   0  -2 -32    1.72    1.89
   0  -2   7  232.93    3.17
   0  -1   4  133.96    3.77
   0   1 -17   14.73    2.02
   0   1  -7  170.19    2.82
   1  -1 -30   87.32    2.62
   1   1 -21  193.25    2.57
   2  -1 -31   10.17    1.97
   2   0 -28    1.25    1.77
   2   1 -23  178.29    2.51
   2   2 -15   18.16    1.62
   2   2 -14   54.14    2.19
   2   2  -8  163.84    2.43
   3  -8  19    1.11    2.03
   3  -7  18    4.30    1.95
   3  -6  17   88.89    2.25
   3  -2  11  284.70    3.79
   3   0 -29    2.48    1.81
   3   1 -25   62.74    1.98
   3   2 -19    8.28    1.66
   4  -9  20   72.62    2.41
   4   1 -26  126.44    2.16
   4   2 -21   48.66    1.85
   4   2  -1   30.69    2.14
   5  -7  19  129.63    2.92
   5  -5  17    5.15    2.25
   5   2 -22    2.22    1.67
   5   3 -14  194.36    2.20
   5   3 -13   55.92    1.83
   5   3  -8  132.45    2.08
   5   3  -7  461.60    2.84
   6  -8  20    4.64    2.46
   6   1 -27   31.36    1.96
   6   2 -23   -0.81    1.64
   6   2   2  547.13    3.83
   6   3 -17   40.87    1.76
   6   3 -16  386.62    2.60
   6   3  -4  271.59    2.54
   7  -8  20    4.23    2.52
   7   1 -27    0.53    1.93
   7   2 -23    6.79    2.15
   7   2   3  115.64    2.43
   7   3 -18   51.45    1.84
   7   3 -17  209.89    2.52
   8  -8  20    2.43    2.95
   8   1   7  517.81    4.18
   8   3 -18   -0.97    1.73
   9   2 -23   10.55    1.95
   9   2   4  435.69    3.43
   9   3 -18   -0.84    1.72
   9   3  -1    1.22    2.01
  10  -7  19    0.23    4.94
  10   2 -23   -0.24    1.91
  10   2   4  121.99    2.51
  10   3 -18    1.27    1.75
  10   3  -1    1.34    2.04
  11   1   7    7.41    2.12
  11   2 -22    1.39    1.94
  11   2   4   32.59    1.78
  11   3 -17   21.16    1.86
  11   3  -1  242.61    2.33
  12  -3  14   16.58    3.65
  12  -1  11  111.30    3.26
  12   0   9    9.83    2.40
  12   2   3    4.50    2.16
  12   3 -16   18.46    1.93
  12   3 -15    5.61    1.88
  12   3  -2  181.07    2.22
  13  -2  12   11.75    2.89
  13   2   2    4.25    2.29
  13   3 -14   12.23    1.92
  13   3 -13    0.90    1.87
  13   3 -12   34.57    1.95
  13   3  -5   18.90    2.22
  13   3  -4   44.69    1.89
  14  -2  11    1.61    3.01
  14   2   1    8.57    1.78
  15  -2  10   29.17    3.02
  15  -1   8    5.59    2.77
  15   0   6   48.70    2.57
  15   1   3  188.49    2.93
  16   0   4    6.90    2.47
  16   1   0   44.86    2.58
  16   1   1   43.15    2.19
 -15 -16  -5    7.26    1.93
 -15 -15  -7    2.32    1.87
 -15 -14 -11   39.36    2.03
 -15 -14 -10    1.79    2.31
 -14 -15  -2   42.87    1.89
 -14 -14  -4   44.08    2.33
 -14 -13  -7   10.55    1.82
 -14 -12 -12   17.87    1.80
 -14 -12 -11    1.15    2.14
 -13 -16   3   15.79    1.88
 -13 -14   0   15.64    1.78
 -13 -13  -2   63.17    1.89
 -13 -11  -8   11.72    2.07
 -12 -13   2   26.04    2.08
 -12 -12   0   36.65    1.75
 -12 -10  -6    0.98    1.60
 -12  -9 -22    1.85    3.26
 -12  -9 -12   45.14    2.21
 -12  -9 -11   18.13    2.06
 -11 -16   8    3.69    1.81
 -11 -15   7    7.25    1.76
 -11 -14   6   72.91    1.86
 -11 -13   5    1.91    1.98
 -11 -12   3   -0.21    1.66
 -11 -10  -1  124.34    1.88
 -11  -9  -4    0.45    1.95
 -11  -8  -9  205.23    2.61
 -10 -16  10   28.41    1.88
 -10 -12   6   16.46    1.64
 -10  -9   0   29.33    1.60
 -10  -8  -3  212.62    2.20
  -9 -16  12   15.40    2.26
  -9 -11   7   14.03    1.59
  -9  -8   1    0.73    1.56
  -9  -7  -2  106.46    2.21
  -9  -6  -7   26.14    2.09
  -8 -15  13   88.27    2.07
  -8 -14  12    1.94    1.69
  -8 -11   9  129.64    1.88
  -8  -9   6    9.10    1.56
  -8  -8   4   -0.59    1.59
  -8  -5 -22   54.59    5.15
  -7 -14  14   99.88    2.39
  -7 -13  13    2.11    1.61
  -7 -12  12    2.79    1.62
  -7 -11  11  106.80    1.89
  -7 -10  10    5.45    1.93
  -7  -6   2    1.60    1.94
  -7  -5 -27    4.61    2.97
  -7  -4 -21  332.14    6.21
  -6 -14  15   40.35    1.90
  -6  -7   7    2.70    1.58
  -6  -5 -30   12.01    2.67
  -6  -5   2  354.53    2.65
  -6  -4 -26    0.68    2.63
  -5 -15  17   24.36    2.32
  -5 -13  16    3.33    1.99
  -5 -12  15    6.88    1.63
  -5  -9  12    2.90    1.58
  -5  -7   9  732.77    3.02
  -5  -6   7   27.73    1.64
  -5  -4 -29    2.35    2.45
  -5  -2 -15   71.71    4.08
  -4 -13  17   -0.44    1.63
  -4  -6   9  193.31    2.07
  -4  -5   7  112.94    1.98
  -4  -2 -23   43.41    2.20
  -3 -13  18   41.38    1.88
  -3 -10  16   14.22    1.94
  -3  -9  15   77.06    2.13
  -3  -5   9  907.25    3.59
  -3  -3 -30   -0.72    2.16
  -3  -3   4   12.42    2.37
  -3  -2 -26    4.99    2.43
  -3  -1 -20   62.29    2.53
  -2 -13  19   24.40    2.20
  -2 -10  17   -0.34    1.55
  -2  -9  16   74.14    1.78
  -2  -8  15  138.90    1.90
  -2  -2   3    6.93    2.21
  -2  -1 -24    0.01    2.00
  -2   0 -15  227.89    2.96
  -2   0 -14  118.31    2.87
  -2   0 -10   10.19    2.60
  -1 -10  18   24.81    2.06
  -1  -9  17   72.95    1.83
  -1  -8  16   10.62    1.62
  -1  -7  15   31.08    1.99
  -1  -5  12  124.25    1.96
  -1  -3   8    4.05    1.81
  -1  -2 -30   23.90    2.32
  -1   0 -21  249.26    2.76
   0 -12  20   -0.21    2.16
   0  -9  18   51.72    2.16
   0  -8  17    5.32    1.65
   0  -7  16  182.32    2.29
   0  -1 -28   75.58    2.37
   0   0 -24   -1.08    1.65
   0   1 -16  118.65    2.45
   0   1  -8  290.48    3.44
   1 -11  20   30.31    1.87
   1  -8  18  195.16    2.54
   1  -7  17  200.32    2.49
   1  -1   6  165.49    3.95
   1   0 -26    0.20    1.71
   1   1 -20   58.03    2.12
   2 -10  20   83.82    2.41
   2  -3  12  345.36    3.30
   2  -2  10   25.69    2.51
   2   0 -27    5.35    2.14
   2   1   0  319.17    4.52
   2   2 -13  130.94    2.15
   2   2 -12  554.21    3.21
   2   2 -11  289.05    2.69
   2   2 -10  594.07    3.41
   2   2  -9   98.98    2.23
   3 -11  21   15.74    2.28
   3  -5  16  159.97    2.57
   3  -3  13   73.70    2.51
   3  -1 -31    1.40    2.30
   3   0 -28    4.81    1.79
   3   1 -24  180.76    2.27
   3   1   2   17.69    2.98
   3   2 -18   96.21    2.00
   3   2  -4  105.91    2.42
   4  -2  12 1002.30    6.80
   4   0 -29   -0.52    1.83
   4   1 -25    7.91    2.15
   4   2 -20   21.87    1.77
   5 -10  21    0.38    2.20
   5   0 -29   11.12    2.37
   5   1 -26   18.80    1.87
   5   2 -21   23.76    2.10
   5   3 -12   88.14    1.93
   5   3 -11    1.69    1.62
   5   3 -10    4.18    1.67
   5   3  -9   46.85    1.78
   6   2 -22   47.77    1.87
   6   3 -15   18.33    1.71
   6   3 -14  154.01    2.35
   6   3  -6  752.77    3.59
   6   3  -5  175.95    2.22
   7   1 -26    1.81    2.29
   7   2 -22   41.03    2.21
   7   3 -16   71.36    1.88
   7   3  -3   42.20    1.83
   8   1 -26    3.43    2.38
   8   2 -23   34.28    1.91
   8   3 -17   53.93    1.85
   8   3 -16   20.59    2.08
   8   3  -2  449.25    2.78
   9   1   7   25.34    2.48
   9   2 -22    6.93    1.82
   9   3 -17   15.66    1.79
   9   3 -16   42.02    2.19
   9   3  -2  359.99    2.90
  10   1   7   79.47    2.39
  10   2 -22    7.20    1.87
  10   3 -17   10.81    1.78
  10   3 -16   15.42    1.82
  10   3  -2   12.28    2.09
  11  -2  13   54.94    3.57
  11   2 -21   12.32    1.93
  11   3 -16    1.22    1.81
  11   3 -15    4.34    1.77
  11   3  -2    7.93    1.71
  12  -5  16   10.97    5.08
  12   1   6   29.76    2.52
  12   2 -20   18.86    2.01
  12   3 -14    2.16    1.86
  12   3 -13   11.97    1.86
  12   3 -12   19.50    2.29
  12   3  -4    3.47    2.14
  12   3  -3   45.40    1.82
  13  -1  10   18.78    2.89
  13   0   8    1.49    2.12
  13   2 -18   14.92    2.05
  13   3 -11    8.07    1.86
  13   3 -10   50.97    2.02
  13   3  -9   29.77    1.87
  13   3  -8    7.09    1.79
  13   3  -7    0.96    1.78
  13   3  -6    7.86    1.81
  14  -1   9    1.55    2.58
  14   0   7   16.02    2.26
  14   1   4   99.16    2.56
  14   2 -15    4.93    2.55
  14   2  -1    2.46    2.21
  14   2   0    4.31    1.82
  15   1   2    1.03    2.40
  15   2 -12    0.37    2.01
  15   2 -11    2.46    1.98
  15   2 -10   -0.71    2.51
  15   2  -9   29.79    2.54
  15   2  -6   17.22    2.49
  15   2  -5   73.01    2.64
  15   2  -4   13.00    1.98
  15   2  -3   11.56    1.99
  16  -1   6    4.25    2.50
  16   0   3   11.66    2.56
  16   1  -1   25.88    2.61
 -15 -16  -4   34.46    2.03
 -15 -15  -6    6.63    1.86
 -15 -14  -9   46.56    2.42
 -15 -13 -18   -0.28    2.72
 -15 -13 -17   48.58    2.97
 -14 -16   0    6.43    1.90
 -14 -15  -1   59.04    2.38
 -14 -14  -3    3.95    2.18
 -14 -13  -6   35.76    1.82
 -14 -12 -10  122.19    2.55
 -13 -15   2    2.40    1.71
 -13 -14   1    7.67    2.16
 -13 -13  -1   35.81    1.85
 -13 -12  -4    3.70    1.65
 -13 -11  -7  131.97    2.40
 -13 -10 -19   35.58    2.66
 -13 -10 -17   88.70    2.86
 -13 -10 -16   10.47    2.11
 -13 -10 -15   56.03    2.34
 -13 -10 -14   17.57    2.42
 -12 -16   6    3.24    1.78
 -12 -15   5   58.94    1.94
 -12 -14   4    0.93    1.72
 -12 -11  -2  161.60    2.13
 -12 -10  -5   -0.36    1.63
 -12  -9 -10  139.71    2.49
 -11 -12   4  229.31    2.19
 -11 -11   2    3.65    1.56
 -11  -8  -8    4.81    1.89
 -10 -15  10   72.70    2.02
 -10 -14   9    9.58    1.73
 -10 -13   8   12.82    1.67
 -10 -11   5  249.99    2.17
 -10 -10   3    3.31    1.56
 -10  -7  -7   91.86    2.26
  -9 -14  11   45.30    1.83
  -9 -13  10    3.33    1.63
  -9 -12   9   58.71    1.76
  -9 -10   6  144.15    1.92
  -9  -9   4  182.93    2.00
  -9  -6  -6    1.60    1.95
  -8 -13  12   17.54    1.67
  -8 -12  11    5.31    1.98
  -8 -10   8    6.28    1.53
  -8  -7 -31   17.30    3.44
  -8  -7   2   84.03    1.85
  -8  -5  -6    5.28    2.02
  -7 -15  15    4.99    2.21
  -7  -8   7    0.45    1.50
  -7  -7   5   66.02    1.76
  -7  -5  -1  187.99    2.62
  -6 -15  16    1.12    1.83
  -6 -13  15   29.86    1.75
  -6 -12  14   -0.30    1.57
  -6 -11  13   73.61    1.77
  -6 -10  12    3.26    1.57
  -6  -8   9   15.93    1.57
  -6  -6   5  207.83    2.12
  -6  -3 -19   17.30    3.38
  -5 -14  17    4.85    2.13
  -5  -8  11   45.60    1.63
  -5  -5 -32    1.07    2.64
  -5  -5   5    1.67    1.61
  -5  -4   2  496.28    3.18
  -5  -3  -2   70.93    2.49
  -5  -2 -14  333.48    6.52
  -4 -14  18   88.36    2.14
  -4 -11  16    0.40    1.58
  -4 -10  15  311.81    2.30
  -4  -9  14   46.20    1.66
  -4  -7  11   51.85    1.71
  -4  -4 -31   -0.37    2.23
  -3 -14  19    6.72    2.25
  -3 -11  17   25.73    1.72
  -3  -8  14  143.04    1.90
  -3  -6  11   54.19    1.70
  -3  -4   7   13.76    1.82
  -2 -11  18   36.23    1.77
  -2  -7  14   17.65    1.62
  -2  -2 -28   57.38    2.34
  -2  -1  -1  362.53    5.30
  -2   0 -13   44.67    2.31
  -2   0 -12  358.17    3.93
  -2   0 -11  165.05    3.03
  -1 -13  20    1.22    1.86
  -1 -11  19    7.86    2.06
  -1  -6  14  276.55    2.60
  -1  -1 -26    8.95    2.12
  -1   0 -20   40.52    2.14
   0 -10  19   -0.18    1.66
   0  -6  15  144.10    2.35
   0  -2 -31   67.92    2.18
   0   0 -23   20.68    2.09
   0   1 -15    3.50    1.75
   0   1 -14   -0.48    1.99
   0   1  -9  586.09    4.10
   1  -9  19   -1.48    1.97
   1  -6  16   45.09    1.99
   1  -4  13  320.05    2.99
   1  -3  11   59.62    1.90
   1  -2 -32   29.25    2.15
   1  -1 -29    1.88    1.81
   1   0 -25    0.65    2.07
   1   1 -19  442.32    3.24
   1   1  -3  256.71    3.94
   2  -4  14    4.18    1.94
   2  -1 -30   13.67    1.93
   2   1 -22   23.45    1.76
   3  -9  20   15.24    2.07
   3   1 -23   50.11    2.21
   3   2 -17    2.97    1.65
   4 -10  21    4.85    2.23
   4  -7  19   93.82    2.65
   4  -6  18    4.23    2.29
   4   0 -28   35.16    1.98
   4   2 -19    2.87    1.63
   5  -8  20   10.21    2.13
   5  -4  16   90.37    2.89
   5   1 -25   41.57    1.89
   5   2 -20   15.56    2.06
   6  -3  15   59.04    3.46
   6   2 -21    8.34    1.70
   6   3 -13   20.50    1.68
   6   3 -12    2.74    1.63
   6   3 -11    0.53    1.64
   6   3 -10  166.05    2.42
   6   3  -9   36.97    2.13
   6   3  -8  431.31    2.72
   6   3  -7   67.19    1.88
   7   3 -15  131.99    2.05
   7   3 -14    3.95    1.67
   7   3  -5  206.94    2.53
   7   3  -4    2.27    1.66
   8   2 -22    2.13    1.81
   8   2   3  229.61    2.79
   8   3 -15    2.13    1.68
   8   3  -3  368.70    2.62
   9   1 -25   38.30    2.12
   9   2 -21   13.43    1.87
   9   3 -15    2.71    1.72
   9   3  -3    6.95    2.13
  10   2 -21   -0.65    1.87
  10   2   3  180.52    2.61
  10   3 -15    9.95    1.73
  10   3 -14   32.16    1.83
  10   3  -3   91.03    1.91
  11   0   9  135.40    2.88
  11   2 -20    0.56    1.88
  11   2   3  122.88    2.10
  11   3 -14    2.82    1.78
  11   3 -13    3.48    1.80
  11   3 -12    5.08    2.11
  11   3  -4   10.16    1.61
  11   3  -3   14.82    1.71
  12  -4  15    9.59    4.06
  12   2 -19   38.86    2.10
  12   2 -18   17.19    2.01
  12   2   2    5.00    2.09
  12   3 -11   18.24    1.83
  12   3 -10   61.16    1.97
  12   3  -9   33.70    1.80
  12   3  -8   53.78    1.87
  12   3  -7   16.68    1.79
  12   3  -6   15.84    1.78
  12   3  -5    1.72    1.75
  13   1   5    1.27    2.18
  13   2 -17    1.91    1.96
  13   2 -16    0.38    1.96
  13   2   1   -0.32    1.71
  14  -3  12    5.48    3.18
  14   2 -14   34.61    2.06
  14   2 -13    4.47    2.01
  14   2  -2    0.67    2.26
  15   0   5   10.68    2.39
  15   1   1  216.05    3.03
  15   2  -8   13.02    2.07
  15   2  -7   64.05    2.24
  16   1  -4    4.33    2.52
  16   1  -3   22.79    2.64
  16   1  -2   35.28    2.14
 -15 -16  -3   57.95    2.11
 -15 -15  -5    8.07    2.28
 -15 -14  -8    0.53    2.23
 -15 -13 -19   35.85    2.61
 -15 -13 -16    1.70    2.33
 -15 -13 -15   27.93    2.36
 -15 -13 -14    0.53    2.33
 -15 -13 -13    0.59    2.24
 -14 -16   1   -0.50    1.75
 -14 -13  -5    0.85    2.13
 -14 -12  -9    0.32    2.17
 -13 -16   4   62.44    2.07
 -13 -15   3    1.50    1.78
 -13 -12  -3   70.89    1.88
 -13 -11  -6    1.45    2.09
 -13 -10 -20    5.07    2.54
 -13 -10 -13    2.10    2.06
 -13 -10 -12    1.32    2.02
 -12 -16   7    4.67    2.25
 -12 -15   6    4.91    2.21
 -12 -13   3   62.66    1.84
 -12 -12   1   12.78    1.70
 -12 -11  -1   27.18    2.07
 -12 -10  -4   33.43    2.05
 -12  -9  -9   11.09    2.01
 -11 -16   9   67.89    2.03
 -11 -15   8    0.09    1.75
 -11 -14   7    3.00    1.74
 -11 -13   6   55.45    1.78
 -11 -10   0   19.21    1.59
 -11  -9  -3  150.62    2.04
 -10 -16  11    6.41    1.81
 -10 -12   7   -0.84    1.58
 -10  -9   1    4.35    1.52
 -10  -8  -2  354.93    2.58
 -10  -7  -6  270.84    2.75
  -9 -15  12    1.20    1.78
  -9 -11   8  100.32    1.78
  -9  -8   2   96.32    1.84
  -9  -7  -1  417.43    2.81
  -8 -15  14   17.09    2.23
  -8 -14  13   13.42    1.72
  -8 -11  10  350.09    2.37
  -8  -9   7   69.31    1.75
  -8  -8   5  495.06    2.63
  -8  -6  -1  172.35    2.19
  -7 -13  14   44.61    1.77
  -7 -12  13    1.43    1.61
  -7 -11  12    0.40    1.59
  -7  -9   9   23.55    1.62
  -7  -4  -6  106.98    2.43
  -6 -14  16   21.48    1.76
  -6  -9  11   13.53    1.60
  -6  -4  -1  168.89    2.71
  -6  -3  -7   90.89    2.98
  -5 -12  16    2.07    2.01
  -5 -11  15   18.11    1.67
  -5 -10  14  289.96    2.23
  -5  -3 -24  226.59    3.54
  -5  -2 -13  178.99    6.57
  -4 -12  17    7.27    1.67
  -4  -8  13    9.13    1.53
  -4  -4   5  451.64    2.96
  -4  -3 -27    4.18    2.37
  -4  -2 -22   10.22    2.34
  -4  -2  -3  365.20    4.09
  -3 -12  18    1.36    1.69
  -3  -7  13   61.30    1.71
  -3  -1 -19    3.02    2.22
  -3  -1  -5  121.85    5.68
  -2 -12  19   32.71    1.81
  -2  -5  11   66.81    1.78
  -2  -4   9   49.97    1.92
  -2  -3 -31    5.74    2.30
  -2  -1 -23    3.07    2.04
  -1 -12  20    3.34    2.15
  -1  -3 -32   16.57    2.41
  -1  -2 -29   59.60    2.44
  -1  -1   2   25.81    2.98
   0 -11  20    0.38    2.11
   0  -4  12   74.44    2.27
   0  -3  10   49.78    2.24
   0  -1 -27   25.87    2.21
   0   1 -13   54.59    1.85
   0   1 -12   66.17    2.35
   0   1 -11   70.72    2.40
   0   1 -10  276.33    3.16
   1 -12  21   49.44    2.08
   1 -10  20   34.97    2.23
   1  -2   9    0.36    2.12
   2 -11  21    4.12    2.18
   2  -8  19    1.64    1.95
   2  -7  18    3.01    1.97
   2  -6  17   83.12    2.19
   2   0 -26    1.58    1.74
   2   1 -21  307.69    2.65
   3 -10  21   53.64    2.50
   3  -4  15  320.27    3.25
   3  -1 -30    5.36    1.88
   3   0 -27   31.38    1.80
   3   2 -16   77.87    1.84
   3   2 -15   49.79    2.14
   3   2  -5 1441.40    5.14
   4  -8  20   80.02    2.69
   4  -5  17  186.90    2.94
   4  -3  14  140.68    2.88
   4   1 -24  149.78    2.16
   4   2 -18   37.69    1.68
   4   2  -2    2.30    1.97
   5   0 -28   33.19    1.94
   5   1 -24    7.85    2.12
   5   2 -19   89.18    2.25
   5   2   0    5.76    1.90
   6  -9  21    2.04    2.61
   6   0 -28    1.16    1.90
   6   1 -25   13.20    1.80
   6   2 -20  163.27    2.19
   6   2   1   78.89    2.53
   7   0   9  176.78    4.14
   7   1 -25    1.43    1.78
   7   1   6  224.45    3.37
   7   2 -21   21.19    1.78
   7   2   2   33.17    2.22
   7   3 -13    6.95    1.62
   7   3 -12   25.91    1.75
   7   3 -11  102.60    2.23
   7   3  -7  583.30    3.21
   7   3  -6   16.03    1.71
   8   1 -25   26.01    1.97
   8   2 -21   36.98    1.86
   8   3 -14    7.04    1.66
   8   3 -13  117.16    1.99
   8   3 -12    2.60    2.04
   8   3  -5   37.96    2.18
   8   3  -4  111.49    2.00
   9   1 -24    6.85    1.95
   9   2 -20    0.93    1.76
   9   2   3    1.16    1.69
   9   3 -14  108.89    2.04
   9   3 -13   46.38    1.78
   9   3 -12  114.27    2.29
   9   3  -4  488.40    2.90
  10   2 -20    2.15    1.83
  10   2 -19    8.29    2.21
  10   3 -13    2.68    1.72
  10   3 -12   13.65    1.72
  10   3 -11    5.21    2.08
  10   3  -5  210.71    2.51
  10   3  -4   54.15    1.83
  11  -1  11   12.24    2.74
  11   1   6   -0.27    2.13
  11   2 -19   43.66    2.02
  11   2 -18    0.78    2.28
  11   2   2    1.18    2.08
  11   3 -11   41.62    1.82
  11   3 -10    0.86    1.72
  11   3  -9  156.67    2.15
  11   3  -8    2.14    1.74
  11   3  -7  358.17    2.60
  11   3  -6    7.76    1.72
  11   3  -5  167.28    2.05
  12   2 -17   37.65    2.09
  12   2   1    5.67    2.22
  13  -3  13   39.58    3.27
  13   2 -15    9.46    1.97
  13   2 -14   17.84    2.43
  13   2  -1   10.42    2.23
  13   2   0   41.43    1.88
  14   0   6    1.38    2.24
  14   1   3  107.75    2.30
  14   2 -12   50.75    2.09
  14   2 -11   14.52    1.89
  14   2 -10    8.36    2.42
  14   2  -9    3.20    2.41
  14   2  -5  122.93    2.65
  14   2  -4   10.39    1.89
  14   2  -3   73.81    2.08
  15  -2   9    8.48    2.46
  15  -1   7   21.11    2.55
  15   0   4    1.84    2.36
  16  -1   5   47.84    2.74
  16   0   1   43.92    2.69
  16   0   2    7.40    2.03
  16   1  -6    8.31    2.12
  16   1  -5   12.29    2.04
 -15 -16  -2   33.54    2.08
 -15 -15  -4   10.89    1.86
 -15 -14  -7   18.96    1.98
 -15 -13 -12    0.64    2.24
 -14 -16   2    2.88    2.29
 -14 -15   0   31.91    1.93
 -14 -14  -2   45.48    2.02
 -14 -13  -4    8.54    2.17
 -14 -12  -8  249.39    2.54
 -13 -16   5    4.26    1.87
 -13 -14   2    2.88    1.72
 -13 -13   0   16.19    1.71
 -13 -12  -2    0.62    1.69
 -13 -11  -5   46.22    2.15
 -13 -10 -21    1.21    2.86
 -13 -10 -11   41.86    2.21
 -12 -14   5   92.17    1.98
 -12 -12   2    2.30    1.61
 -12  -9 -23    0.64    3.38
 -12  -9  -8  119.79    2.33
 -11 -15   9   29.93    2.27
 -11 -14   8   11.38    2.10
 -11 -12   5    5.66    1.66
 -11 -11   3    2.46    1.60
 -11 -10   1   51.96    2.10
 -11  -9  -2   12.84    1.93
 -11  -8  -7  252.39    2.34
 -10 -15  11    4.25    1.81
 -10 -14  10   92.09    1.94
 -10 -11   6    7.92    1.59
 -10 -10   4    3.29    1.59
 -10  -9   2    2.46    1.91
 -10  -8  -1   48.83    2.06
  -9 -14  12    3.30    1.73
  -9 -13  11   37.53    1.80
  -9 -12  10   88.48    2.18
  -9 -10   7   32.15    1.98
  -9  -9   5    1.74    1.58
  -9  -6  -5    1.03    1.95
  -8 -10   9   67.32    1.70
  -8  -7   3  174.72    2.06
  -8  -6 -27   30.90    3.77
  -8  -5  -5  305.33    2.90
  -7 -14  15    0.08    1.73
  -7 -10  11  437.26    2.51
  -7  -6 -30   11.17    2.95
  -7  -6   3    5.05    1.56
  -6 -12  15   35.27    1.79
  -6 -11  14   41.16    1.69
  -6 -10  13   -0.27    1.91
  -6  -8  10   59.97    1.69
  -6  -7   8  116.57    1.87
  -6  -5   3   15.99    1.69
  -5 -13  17    0.34    1.73
  -5  -9  13    8.36    1.57
  -5  -7  10   19.03    1.63
  -5  -6   8   25.74    1.68
  -5  -4 -28   15.55    2.52
  -4 -13  18   64.97    1.96
  -4  -6  10 1288.67    3.94
  -4  -5   8  209.18    2.49
  -4  -3   2  608.76    3.64
  -3 -13  19   95.79    2.16
  -3 -10  17    1.56    1.97
  -3  -9  16  300.10    2.58
  -3  -4 -32    0.81    2.24
  -3  -3 -29   18.95    2.19
  -3  -2 -25   23.24    2.14
  -2 -13  20    2.74    2.26
  -2 -10  18   64.95    2.32
  -2  -9  17    0.72    1.54
  -2  -8  16   34.01    2.09
  -2  -6  13  161.29    1.97
  -2  -2 -27    3.72    2.10
  -1 -10  19   32.71    2.17
  -1  -9  18   15.33    2.00
  -1  -8  17    9.27    1.96
  -1  -1 -25   12.41    2.05
  -1   0 -19  349.10    3.16
   0  -8  18  302.00    2.87
   0  -5  14  278.75    2.60
   0  -2 -30    1.87    2.27
   0   0 -22  191.33    2.68
   1 -11  21   16.53    2.25
   1  -5  15  180.85    2.53
   1  -2 -31   14.77    1.97
   1  -1 -28   42.51    1.93
   1   0 -24   69.56    1.87
   1   1 -18    9.14    1.68
   2  -9  20   18.96    2.10
   2  -1 -29   -0.74    1.82
   2   0 -25   74.31    2.29
   2   1 -20   25.19    2.11
   3   0 -26   32.18    2.24
   3   1 -22  160.82    2.23
   3   2 -14  481.97    2.95
   3   2 -13  109.90    2.30
   3   2  -6  365.52    3.03
   4  -1 -30   21.60    1.96
   4   0 -27   -0.32    1.79
   4   1 -23   47.16    1.88
   4   2 -17  125.18    2.02
   5  -9  21   24.46    2.30
   5   0 -27   22.94    2.32
   5   2 -18    3.41    2.03
   6   0 -27   13.85    2.32
   6   1 -24    1.08    1.70
   6   2 -19   17.84    1.72
   7  -6  19   36.41    2.89
   7  -5  18    0.67    3.06
   7   0 -27    2.30    2.31
   7   1 -24   10.02    1.92
   7   2 -20   74.79    1.95
   7   2 -19   38.07    2.15
   7   3 -10  119.30    1.97
   7   3  -9  367.31    2.56
   7   3  -8  190.30    2.23
   8  -6  19    0.58    3.41
   8  -5  18   45.37    4.02
   8   1 -24    9.54    1.84
   8   2 -20    6.78    1.80
   8   2 -19   27.13    2.13
   8   2   2   44.83    2.20
   8   3 -11  383.85    2.56
   8   3 -10    0.60    1.63
   8   3  -9  399.86    2.59
   8   3  -8    1.67    1.68
   8   3  -7   72.60    1.88
   8   3  -6    4.57    1.75
   9   1 -23   47.94    2.52
   9   2 -19    2.59    1.73
   9   3 -11   70.46    1.88
   9   3 -10   75.75    1.92
   9   3  -9   64.84    1.84
   9   3  -8   16.23    1.69
   9   3  -7    2.60    1.66
   9   3  -6  229.34    2.28
   9   3  -5    1.97    1.80
  10   0   9   69.20    2.78
  10   1 -23    3.94    1.96
  10   1   6  147.25    2.84
  10   2 -18   16.98    2.26
  10   2   2  230.67    2.77
  10   3 -10    3.58    1.65
  10   3  -9   27.30    1.79
  10   3  -8  113.61    2.06
  10   3  -7  168.50    2.20
  10   3  -6  173.51    2.17
  11   2 -17   65.09    2.03
  12   0   8   12.28    2.14
  12   1   5   -0.29    2.15
  12   2 -16    9.90    1.94
  12   2   0   90.77    2.37
  13  -4  14    1.39    3.70
  13   0   7   -0.15    2.14
  13   1   4   77.13    2.10
  13   2 -13   16.26    1.91
  13   2 -12   95.28    2.49
  13   2  -2  104.71    2.42
  14  -2  10   69.19    3.14
  14  -1   8   19.71    2.68
  14   1   2   66.51    2.11
  14   2  -8    6.23    1.91
  14   2  -7   36.72    2.02
  14   2  -6   20.26    1.95
  15   1 -11   31.10    2.62
  15   1  -2    1.30    2.39
  15   1  -1  122.86    2.37
  16  -1   4    0.98    2.51
  16   0   0    5.22    2.62
 -16 -15 -10    3.76    2.00
 -15 -16  -1   54.11    2.18
 -15 -15  -3   47.54    2.08
 -15 -14  -6    1.14    1.81
 -15 -13 -11   36.55    1.99
 -15 -13 -10    2.62    2.23
 -14 -15   1    9.28    1.83
 -14 -14  -1    8.72    1.79
 -14 -12  -7   25.01    1.90
 -14 -11 -18   57.63    2.82
 -14 -11 -17  119.68    2.88
 -14 -11 -16   19.51    2.30
 -14 -11 -15   92.62    2.56
 -14 -11 -14    2.54    2.15
 -13 -15   4   50.57    2.01
 -13 -14   3    6.56    1.78
 -13 -13   1    2.16    1.72
 -13 -10 -10   29.73    1.78
 -12 -16   8   -0.49    1.83
 -12 -15   7    8.94    1.83
 -12 -13   4   15.46    1.73
 -12 -11   0  314.65    2.43
 -12 -10  -3   11.57    1.64
 -12  -9  -7   47.27    2.13
 -11 -16  10    3.61    1.84
 -11 -13   7    1.64    1.66
 -11  -8  -6   27.45    1.65
 -10 -12   8    0.31    1.60
 -10  -7  -5  187.07    2.13
  -9 -15  13   25.73    1.86
  -9 -11   9   -0.55    1.60
  -9  -8   3   86.76    1.77
  -9  -7   0   96.65    1.93
  -8 -14  14   23.30    1.72
  -8 -12  12   16.15    1.61
  -8 -11  11  136.48    1.97
  -8  -9   8    4.57    1.55
  -8  -8   6    2.02    1.52
  -8  -6   0  142.42    1.99
  -7 -15  16   16.37    1.82
  -7 -12  14   11.98    1.63
  -7  -9  10   20.97    1.67
  -7  -7   6  390.62    2.46
  -7  -5 -26    1.56    2.92
  -7  -5   0  131.13    2.05
  -7  -4  -5   43.72    2.13
  -6 -14  17    1.68    2.21
  -6 -13  16   13.17    1.72
  -6  -9  12   77.58    1.75
  -6  -6 -32    7.08    2.77
  -6  -6   6   79.92    1.81
  -6  -5 -29    0.66    2.50
  -6  -4 -25  154.93    3.55
  -6  -3 -18   93.80    4.24
  -5 -14  18    7.60    1.84
  -5  -8  12   14.14    1.53
  -5  -5 -31    0.47    2.55
  -5  -5   6    5.93    1.59
  -5  -4   3  165.99    2.33
  -5  -2  -9    9.44    4.09
  -4 -14  19    8.81    1.86
  -4 -11  17   14.40    1.67
  -4 -10  16   10.08    1.66
  -4  -9  15  382.40    2.50
  -4  -7  12   17.47    1.61
  -4  -4 -30   16.51    2.25
  -4  -2 -21   70.20    2.69
  -3 -11  18   14.63    1.68
  -3  -8  15    4.43    1.46
  -3  -6  12   44.96    1.75
  -3  -5  10   34.68    1.67
  -3  -2   1  403.44    3.66
  -3  -1 -18  431.10    3.62
  -2 -11  19    0.87    1.68
  -2  -7  15   56.40    2.05
  -2  -3 -30   20.81    2.25
  -2  -3   7    1.21    1.83
  -2  -1 -22   51.70    2.23
  -1 -11  20    1.89    2.05
  -1  -7  16   -0.88    1.64
  -1  -5  13   -0.33    1.49
  -1  -4  11    0.92    1.68
  -1  -2   6  260.32    3.22
  -1   0 -18   46.70    2.22
   0 -12  21   29.76    1.99
   0 -10  20    1.18    2.05
   0  -9  19  113.65    2.03
   0  -7  17    8.73    1.98
   0  -1 -26   31.00    2.23
   0   0 -21   23.23    1.99
   1   0 -23   22.57    2.07
   1   1 -17  121.61    2.01
   2 -10  21   15.31    2.20
   2  -5  16   31.49    2.09
   2  -2 -31    2.26    2.36
   2  -1 -28    2.58    2.21
   3 -11  22   17.34    2.31
   3  -8  20   86.55    2.43
   3  -7  19   20.13    2.06
   3  -6  18   78.33    2.24
   3  -1 -29   12.46    1.98
   3  -1   9   77.01    3.65
   3   1 -21    6.90    1.70
   3   2 -12  608.57    3.17
   3   2 -11  156.85    2.25
   3   2 -10  169.11    2.65
   3   2  -9   52.32    2.39
   3   2  -8   38.33    2.03
   3   2  -7  587.43    3.45
   4  -9  21   -0.32    2.16
   4  -1 -29    0.08    2.27
   4  -1  10  262.73    5.91
   4   0 -26   71.57    2.42
   4   1 -22   39.93    1.77
   4   2 -16  129.70    2.03
   4   2  -3   97.28    2.31
   5   1 -23   24.65    1.83
   5   2 -17  308.60    2.49
   5   2  -1   75.16    2.20
   6  -7  20   14.20    2.74
   6  -6  19    0.76    2.35
   6  -5  18    6.96    2.84
   6   2 -18  215.95    2.27
   7  -7  20    0.20    2.77
   7   1 -23    4.92    1.75
   7   2 -18   85.31    2.32
   8   0 -26   53.82    2.14
   8   1 -23   58.50    2.01
   8   1   6   24.48    2.51
   8   2 -18    6.11    2.11
   9   0   9  180.66    3.38
   9   1   6  405.98    3.74
   9   2 -18   -0.21    1.74
   9   2   2  326.65    2.65
  10   1 -22    1.73    1.88
  10   2 -17   12.76    1.85
  11   1 -21    5.58    1.97
  11   2 -16    1.56    1.88
  11   2   1  156.79    2.17
  12  -2  12   44.91    3.04
  12  -1  10    1.57    2.43
  12   1 -19   29.38    2.13
  12   2 -14    1.90    1.85
  12   2 -13   42.41    2.35
  12   2  -1   16.75    2.21
  13  -2  11   38.62    3.08
  13  -1   9   42.33    2.76
  13   1 -17    5.98    2.00
  13   1   3   31.83    2.32
  13   2 -11    6.16    1.85
  13   2 -10  120.64    2.19
  13   2  -9    1.62    1.85
  13   2  -8   20.92    2.21
  13   2  -7   -0.43    2.15
  13   2  -6   20.02    2.26
  13   2  -5    0.60    2.16
  13   2  -4  130.48    2.25
  13   2  -3   11.57    1.86
  14   0   5   29.53    2.40
  14   1 -14   49.18    2.20
  14   1   1  106.11    2.19
  15  -1   6    7.67    2.45
  15   0   3   50.23    2.15
  15   1 -10    1.09    1.98
  15   1  -9   42.16    2.23
  15   1  -8   -1.59    1.98
  15   1  -7   32.60    2.61
  15   1  -6    3.82    2.38
  15   1  -5    4.76    2.44
  15   1  -4    4.83    1.96
  15   1  -3   18.21    1.98
  16  -1   3   -0.59    2.55
  16   0  -2    1.08    2.50
  16   0  -1   38.11    2.25
 -16 -15  -9    1.37    1.95
 -16 -15  -8    6.96    2.40
 -16 -14 -14   33.42    2.60
 -15 -15  -2    3.71    2.31
 -15 -14  -5    5.80    1.84
 -15 -13  -9   83.39    2.46
 -14 -16   3   16.42    2.00
 -14 -15   2    9.55    2.27
 -14 -14   0   32.81    1.89
 -14 -13  -3    0.05    1.72
 -14 -12  -6  213.05    2.40
 -14 -11 -20   26.21    2.82
 -14 -11 -19   35.91    2.51
 -14 -11 -13   16.95    2.17
 -14 -11 -12    3.53    2.17
 -14 -11 -11    1.05    2.11
 -13 -16   6   25.88    1.97
 -13 -15   5    3.04    1.86
 -13 -12  -1  240.84    2.35
 -13 -11  -4    4.72    1.67
 -13 -10 -22    1.97    2.58
 -13 -10  -9   70.78    2.00
 -13 -10  -8   46.46    2.24
 -12 -14   6    0.20    1.71
 -12 -13   5  100.79    2.01
 -12 -12   3   27.76    1.70
 -12 -11   1    9.76    2.07
 -12 -10  -2  102.21    2.21
 -12  -9  -6   24.63    2.08
 -11 -15  10    4.40    1.78
 -11 -14   9   48.27    2.24
 -11 -12   6  238.04    2.23
 -11 -11   4   41.08    1.78
 -11 -10   2    6.22    1.57
 -11  -9  -1  152.10    2.01
 -11  -8  -5  128.25    2.30
 -10 -15  12   22.71    1.89
 -10 -14  11    0.55    1.72
 -10 -13  10   55.07    1.85
 -10 -11   7  150.58    1.94
 -10 -10   5   31.59    1.68
 -10  -9   3   65.99    2.09
 -10  -8   0  273.63    2.56
 -10  -7  -4  132.89    2.34
  -9 -14  13    3.39    2.13
  -9 -13  12    1.18    1.68
  -9  -9   6  204.01    2.40
  -9  -6  -4  107.78    1.94
  -8 -15  15   66.70    2.10
  -8 -10  10   78.27    1.81
  -8  -7   4  125.84    2.24
  -8  -5  -4  152.38    2.46
  -7 -14  16   84.81    2.03
  -7 -13  15    1.22    1.66
  -7 -11  13    1.32    1.67
  -7 -10  12    1.91    1.56
  -7  -6   4  184.02    2.09
  -6  -4   0  101.84    2.18
  -6  -3  -6  134.27    2.84
  -5 -12  17    9.78    1.74
  -5 -11  16   49.64    1.81
  -5 -10  15   99.95    1.89
  -5  -9  14   -0.16    1.92
  -5  -3 -23    8.85    2.65
  -5  -3  -1  133.13    2.43
  -4 -12  18   19.51    1.78
  -4  -8  14   74.36    1.67
  -4  -4   6  113.91    2.46
  -4  -3 -26  188.03    3.23
  -3 -12  19   83.45    2.02
  -3  -7  14   47.35    2.02
  -3  -4   8  493.95    3.01
  -3  -3 -28   13.65    2.15
  -3  -3   5   73.15    2.10
  -3  -2 -24    6.05    2.07
  -2 -12  20   26.67    1.87
  -2  -5  12   41.88    2.06
  -2  -2 -26   40.79    2.19
  -2  -2   4  965.63    4.90
  -1  -6  15   37.61    2.01
  -1  -3 -31    1.02    2.28
  -1  -3   9  486.62    3.27
  -1  -2 -28   22.74    1.86
  -1  -1 -24   45.08    1.83
   0  -6  16   48.08    2.03
   0  -3 -32    2.27    1.82
   0  -2 -29   57.28    2.44
   1  -9  20    2.40    2.06
   1  -8  19    8.07    1.65
   1  -7  18   46.76    2.19
   1  -2 -30    7.65    1.88
   1  -1 -27    0.80    1.72
   1   1 -16  116.19    2.03
   1   1  -4    9.86    2.48
   2   0 -24   19.91    1.76
   2   1 -19  249.24    2.41
   3  -9  21   57.78    2.34
   3   0 -25   98.01    2.05
   3   1 -20   34.99    2.14
   4  -4  16   26.02    2.37
   4   1   3  148.30    3.41
   4   2 -15  592.54    3.12
   4   2 -14   77.53    1.90
   4   2  -4   41.45    2.05
   5  -7  20    6.53    2.41
   5  -6  19   14.80    2.60
   5  -2  13  139.14    4.07
   5  -1 -29    4.57    1.95
   5   0 -26   19.91    1.85
   5   1 -22    0.73    1.67
   5   2 -16    4.58    1.70
   6   0 -26    2.84    1.81
   6   1 -22   10.75    2.08
   6   1   5   51.95    2.44
   6   2 -17   15.36    1.73
   6   2   0  533.39    3.45
   7   0 -26   23.46    1.94
   7   1 -22   33.47    2.21
   7   2 -17   64.03    2.20
   7   2   1  116.72    2.20
   8  -7  20    5.75    3.46
   8   0   9    0.30    2.24
   8   1 -22    3.99    1.79
   8   2 -17    7.42    1.72
   8   2   1    5.64    2.19
   9   1 -22    5.45    1.85
   9   2 -17   -2.31    1.70
   9   2   1    3.07    2.01
  10  -2  13   34.48    3.61
  10  -1  11  151.62    3.45
  10   1 -21    5.22    1.88
  10   2 -16   27.82    1.77
  10   2   1   90.29    1.94
  11   0   8   96.75    2.84
  11   1 -20   54.74    2.09
  11   1   5   51.67    2.28
  11   2 -15   43.89    1.92
  11   2 -14    5.92    1.83
  11   2   0    2.54    1.70
  12   1 -18    3.73    1.95
  12   1   4   51.64    2.26
  12   2 -12   13.66    1.85
  12   2 -11  164.53    2.61
  12   2  -3   42.24    2.26
  12   2  -2   82.54    2.01
  13   0   6   88.28    2.56
  13   1 -16    9.85    2.06
  13   1   2   40.52    2.33
  14   0   4   72.92    2.56
  14   1 -13    3.93    2.00
  14   1 -12   20.71    2.48
  14   1  -1   27.13    2.33
  14   1   0   20.08    1.90
  15  -2   8   49.95    2.69
  15  -1   5    1.44    2.77
  15   0   2   21.47    2.06
  16  -1   2   -0.29    2.55
  16   0  -4    0.26    2.08
  16   0  -3   20.89    2.13
 -16 -15  -7    3.09    1.89
 -16 -14 -13    3.25    1.97
 -16 -14 -12    0.43    2.36
 -15 -14  -4   -0.49    1.85
 -15 -13  -8   22.08    1.92
 -15 -13  -7   94.74    2.55
 -14 -16   4    1.63    1.89
 -14 -14   1   20.32    2.24
 -14 -13  -2  100.21    2.07
 -14 -12  -5   17.04    1.84
 -14 -11 -21    1.20    3.00
 -14 -11 -10   21.47    2.14
 -13 -14   4   18.16    1.80
 -13 -13   2   11.00    1.70
 -13 -12   0    4.45    1.70
 -13 -11  -3   -0.01    1.70
 -13 -10  -7   27.78    2.10
 -12 -15   8    1.84    1.75
 -12 -14   7   40.39    1.82
 -12 -12   4   47.24    2.16
 -12 -10  -1    4.98    2.01
 -11 -13   8   -0.16    1.73
 -11 -11   5   12.42    1.63
 -11  -9   0    1.97    1.86
 -11  -8  -4   44.27    2.05
 -10 -12   9   84.23    1.80
  -9 -15  14    3.78    1.85
  -9 -12  11   56.08    1.77
  -9 -11  10  273.77    2.26
  -9 -10   8   20.64    1.59
  -9  -8   4  333.10    2.35
  -9  -7   1   50.80    1.79
  -9  -6  -3   44.23    2.04
  -8 -14  15   32.99    1.85
  -8 -13  14    0.52    1.70
  -8 -12  13    3.68    1.62
  -8 -11  12  121.46    1.95
  -8  -7 -30    3.95    3.30
  -8  -6   1  245.56    2.26
  -7  -9  11  162.07    2.26
  -7  -8   9   65.78    1.67
  -7  -7   7    3.57    1.56
  -7  -5   1   37.47    1.81
  -7  -4 -20    2.80    3.69
  -7  -4  -4  944.91    4.40
  -6 -13  17    7.48    1.76
  -6 -12  16   12.95    1.75
  -6 -11  15  119.73    1.91
  -6 -10  14   73.48    1.76
  -6  -8  11   19.21    1.64
  -6  -7   9  168.04    1.97
  -6  -6   7   67.31    1.81
  -6  -5   4  278.08    2.40
  -5 -14  19   37.50    2.38
  -5 -13  18    6.39    1.78
  -5  -8  13    0.03    1.88
  -5  -7  11  476.05    2.64
  -5  -6   9  345.82    2.44
  -5  -4 -27   82.32    3.09
  -4  -6  11   76.14    1.84
  -4  -5 -32    3.66    2.65
  -4  -2  -2   31.10    2.53
  -3 -13  20   14.21    1.88
  -3 -10  18   10.83    1.99
  -3  -9  17   22.73    1.98
  -3  -4 -31    7.26    2.28
  -3  -1 -17   46.89    2.21
  -2 -10  19    3.01    2.07
  -2  -9  18    4.27    2.01
  -2  -6  14    4.08    1.86
  -2  -4 -32   -0.01    2.29
  -2  -4  10  432.56    2.91
  -2  -3 -29   28.86    2.63
  -2  -1 -21   18.93    2.08
  -1 -12  21    2.99    1.82
  -1  -1 -23   38.10    2.46
  -1   0 -17  333.62    3.24
   0 -11  21   26.78    1.91
   0  -2   8   41.24    2.01
   0  -1 -25   12.06    2.09
   0   0 -20  287.65    2.84
   1 -10  21   13.05    2.16
   1  -6  17  156.08    2.32
   1  -4  14   80.58    2.33
   1  -3  12  656.99    4.09
   1   0 -22  231.17    2.72
   1   1 -15   88.67    1.99
   2 -11  22   65.72    2.19
   2  -8  20   59.97    2.19
   2  -7  19   45.50    2.14
   2  -3  13  193.28    3.03
   2  -2 -30   -0.60    2.33
   2  -1 -27   20.48    2.22
   2  -1   8    1.31    2.89
   2   0 -23  215.21    2.58
   2   1 -18  132.13    2.06
   2   1  -1 1402.95    7.41
   3  -5  17  147.63    2.55
   3  -1 -28   29.23    1.94
   3   0 -24   49.87    2.27
   4 -10  22    6.09    2.30
   4  -1 -28   70.92    2.51
   4   0 -25   -0.72    1.74
   4   1 -21   69.83    1.90
   4   2 -13  470.66    2.87
   4   2 -12   -0.60    2.03
   4   2  -5  636.40    3.53
   5  -8  21   28.05    2.62
   5  -5  18   85.66    2.92
   5  -3  15   28.93    3.03
   5  -1 -28   24.24    2.37
   5   0 -25    6.67    2.19
   5   1 -21    0.52    2.03
   5   1   4  107.95    2.93
   5   2 -15  336.52    2.48
   5   2  -2   54.18    2.13
   6  -8  21   -0.04    2.58
   6  -1 -28    1.76    2.34
   6   0 -25    4.03    2.23
   6   2 -16  160.26    2.15
   7  -8  21   -0.72    2.93
   7  -4  17   54.36    3.76
   7   0 -25    5.35    1.85
   7   2 -16   22.49    1.76
   7   2   0  193.32    2.84
   8   0 -25   14.50    2.01
   8   1 -21   41.00    1.93
   8   2 -16   -0.64    1.71
   9  -6  19   11.02    4.78
   9   0 -24    2.26    1.96
   9   1 -21   13.55    1.88
   9   2 -16   35.91    1.85
   9   2 -15   23.17    2.18
  10   0 -23    4.23    1.97
  10   1 -20   12.78    1.90
  10   1   5   66.65    2.44
  10   2 -15   17.34    1.76
  10   2 -14   27.32    1.83
  10   2   0  143.93    2.10
  11  -3  14   60.23    3.97
  11   1 -19   19.70    2.02
  11   1 -18   65.40    2.48
  11   2 -13    0.53    1.75
  11   2 -12    8.92    1.77
  11   2  -2   36.29    2.08
  11   2  -1  100.04    2.04
  12   0   7  216.67    2.90
  12   1 -17   10.54    1.95
  12   1   3   69.56    2.38
  12   2 -10   86.42    2.04
  12   2  -9  154.32    2.24
  12   2  -8  104.35    1.97
  12   2  -7   32.91    1.82
  12   2  -6   41.15    1.87
  12   2  -5    2.35    1.82
  12   2  -4   -0.29    1.77
  13   1 -15   33.47    2.06
  13   1 -14   49.48    2.09
  13   1   1   35.26    2.30
  14  -3  11   12.57    2.85
  14  -2   9    2.14    2.64
  14  -1   7    0.77    2.28
  14   1 -11    3.52    1.89
  14   1 -10    3.53    1.95
  14   1  -9   20.08    2.43
  14   1  -8   21.46    2.33
  14   1  -4    6.49    2.32
  14   1  -3   11.46    2.34
  14   1  -2    2.15    1.85
  15   0   0   36.40    2.50
  15   0   1   48.83    2.16
  16  -1   1   25.16    2.70
 -16 -15  -6    6.41    2.00
 -16 -14 -11    3.43    1.90
 -16 -14 -10   14.85    2.47
 -15 -15  -1   73.80    2.19
 -15 -14  -3   29.84    1.92
 -15 -13  -6   39.12    2.37
 -15 -12 -17    5.38    2.30
 -15 -12 -16   49.66    2.61
 -15 -12 -15   14.77    2.34
 -15 -12 -14   29.60    2.37
 -15 -12 -13    2.66    2.26
 -14 -15   3    1.68    1.87
 -14 -13  -1    1.86    1.73
 -14 -12  -4   64.06    1.96
 -14 -11  -9   25.41    1.79
 -13 -15   6   67.48    2.06
 -13 -14   5    8.19    2.15
 -13 -13   3   29.63    1.76
 -13 -12   1  136.74    2.43
 -13 -11  -2   10.12    1.74
 -13 -10 -23   10.01    3.36
 -13 -10  -6    1.37    2.01
 -12 -13   6   29.66    1.79
 -12 -11   2  167.73    2.05
 -12  -9 -24   13.10    4.63
 -12  -9  -5   38.52    1.75
 -11 -15  11   37.31    1.96
 -11 -14  10    5.76    1.75
 -11 -12   7   17.88    1.71
 -11 -10   3    9.22    1.62
 -11  -7 -16   63.12    2.94
 -11  -7 -15  140.72    3.01
 -11  -7 -14   48.68    2.51
 -11  -7 -13    0.90    2.24
 -11  -7 -12    6.05    2.30
 -10 -15  13    4.38    1.85
 -10 -14  12   76.79    2.03
 -10 -13  11    3.77    1.72
 -10 -11   8    8.21    1.62
 -10 -10   6    1.33    1.54
 -10  -9   4  128.07    1.90
 -10  -8   1   20.62    1.61
 -10  -7  -3   49.67    1.75
 -10  -6 -15   38.51    2.76
 -10  -6 -14  109.72    2.82
 -10  -6 -13   22.67    2.42
 -10  -6 -12   51.24    2.57
 -10  -6 -11    2.30    2.30
  -9 -13  13   27.55    2.14
  -9  -9   7   11.49    1.90
  -9  -7 -27    1.06    3.76
  -8 -10  11  182.44    2.06
  -8  -9   9    0.84    1.57
  -8  -8   7  131.74    1.85
  -8  -5  -3  330.11    2.66
  -7 -13  16   78.38    1.94
  -7 -12  15    0.85    1.64
  -7 -11  14    4.57    1.62
  -6 -14  18    1.06    1.78
  -6  -9  13   20.62    1.63
  -6  -3  -5  415.73    3.73
  -5 -11  17    2.53    2.00
  -5 -10  16  287.75    2.69
  -5  -5   7   70.77    1.78
  -5  -4   4  491.44    3.04
  -4 -12  19   11.24    2.10
  -4 -11  18    1.63    1.70
  -4 -10  17   60.36    1.79
  -4  -9  16  111.67    1.92
  -4  -7  13   -0.57    1.56
  -4  -5   9   97.20    1.90
  -4  -4 -29    1.53    2.13
  -4  -3   3  217.94    2.58
  -4  -2 -20   10.57    2.28
  -3 -12  20   -1.24    2.16
  -3 -11  19   20.93    1.74
  -3  -8  16  171.31    2.32
  -3  -6  13   -0.99    1.94
  -3  -5  11  566.83    3.13
  -3  -2 -23   15.27    2.43
  -3  -1 -16  395.40    3.87
  -2 -11  20   10.91    2.19
  -2  -8  17   20.62    1.63
  -1 -10  20    2.59    2.10
  -1  -9  19  198.79    2.25
  -1  -8  18   64.79    1.81
  -1  -3 -30   21.76    2.29
  -1  -2 -27   29.12    2.22
  -1   0 -16   -0.11    2.08
   0 -12  22    4.57    2.28
   0  -9  20   16.91    2.16
   0  -8  19   22.08    2.08
   0  -4  13  525.94    3.36
   0  -3 -31    6.61    2.33
   0  -2 -28    1.57    2.14
   1 -11  22   37.72    2.41
   1  -2 -29    9.62    2.23
   1   1 -14   23.87    1.73
   1   1 -13  500.16    3.37
   1   1  -5   47.45    2.44
   2  -9  21   57.16    2.36
   2  -6  18  163.28    2.58
   2  -4  15   96.93    2.27
   2   1 -17   71.72    1.82
   3 -10  22    2.28    2.25
   3  -3  14   11.11    2.24
   3  -2 -30   -0.53    1.84
   3  -1 -27   48.28    2.30
   3   1 -19   30.17    1.77
   3   1   1   63.25    3.24
   4  -8  21   16.31    2.52
   4  -7  20    7.10    2.40
   4  -6  19    3.56    2.31
   4  -2 -30   11.82    2.44
   4   0 -24   66.60    2.29
   4   1 -20   16.99    1.68
   4   2 -11   36.40    1.77
   4   2 -10   15.95    1.81
   4   2  -9  214.82    2.74
   4   2  -8   20.72    2.35
   4   2  -7 1239.14    4.42
   4   2  -6   41.76    1.99
   5   2 -14   33.61    1.76
   5   2 -13  116.67    2.32
   5   2  -3    9.33    1.96
   6  -4  17    4.08    2.84
   6   1 -21    6.16    1.80
   6   2 -15    4.60    1.69
   6   2 -14   18.48    2.04
   6   2  -1   14.83    1.98
   7  -1 -27   27.52    2.52
   7   1 -21   14.79    1.79
   7   1   5   36.91    2.56
   7   2 -15    1.57    1.69
   8   0 -24   85.24    2.13
   8   1 -20   -1.30    2.12
   8   2 -15  105.99    1.99
   8   2   0    6.51    1.73
   9   0 -23   18.27    2.38
   9   1 -20    2.26    1.79
   9   1   5  126.80    2.60
   9   2 -14   74.48    1.92
   9   2   0   94.79    1.98
  10   0 -22    0.38    2.38
  10   1 -19    3.15    1.82
  10   2 -13    3.26    1.75
  10   2  -1   31.45    1.79
  11   0 -21    4.70    2.03
  11   1 -17   23.37    1.95
  11   1   4  100.14    2.35
  11   2 -11   88.38    2.04
  11   2 -10   17.64    1.88
  11   2  -9  216.40    2.69
  11   2  -4   78.80    2.18
  11   2  -3    6.40    1.70
  12   1 -16   -1.18    1.90
  12   1 -15   18.89    1.93
  13  -3  12   -0.02    3.12
  13  -1   8    1.96    2.20
  13   0   5   32.05    2.33
  13   1 -13   42.67    2.00
  13   1 -12   61.93    2.11
  13   1   0    0.76    2.19
  14   0   3   18.13    2.38
  14   1  -7   34.00    2.00
  14   1  -6   27.27    1.93
  14   1  -5   52.62    2.09
  15  -3   9    0.68    2.43
  15  -2   7   27.70    2.70
  15  -1   4    4.05    2.47
  15   0  -9    6.93    2.59
  15   0  -2   26.94    2.50
  15   0  -1   29.41    2.07
  16  -1  -1   45.41    2.83
  16  -1   0    0.24    2.13
 -16 -15  -5   -1.76    1.83
 -16 -14  -9   29.48    2.09
 -16 -14  -8   38.61    2.50
 -15 -15   0    0.25    1.87
 -15 -14  -2    5.05    1.85
 -15 -13  -5   53.90    2.42
 -15 -12 -19    3.95    2.35
 -15 -12 -18   53.14    2.59
 -15 -12 -12    6.76    2.21
 -15 -12 -11    5.11    2.24
 -14 -15   4    2.07    1.82
 -14 -14   2    7.59    1.83
 -14 -13   0   70.75    1.94
 -14 -12  -3    3.86    1.72
 -14 -11 -22   -0.63    3.11
 -14 -11  -8   40.54    1.90
 -14 -11  -7   55.79    2.25
 -13 -15   7    6.00    2.28
 -13 -13   4   -0.56    2.13
 -13 -11  -1   49.04    2.17
 -13 -10  -5    5.08    2.04
 -12 -15   9    1.60    1.82
 -12 -14   8    5.70    1.78
 -12 -12   5   78.69    1.92
 -12 -11   3    5.04    1.98
 -12 -10   0  125.61    1.98
 -12  -9  -4   22.75    1.77
 -12  -8 -16   97.95    3.15
 -12  -8 -15    0.73    2.38
 -12  -8 -14  108.60    2.53
 -12  -8 -13    8.30    2.03
 -12  -8 -12   14.37    2.09
 -11 -13   9   13.53    1.75
 -11 -12   8   21.16    2.06
 -11 -11   6  139.89    1.99
 -11 -10   4    3.96    1.97
 -11  -9   1   59.63    1.73
 -11  -8  -3   59.73    1.76
 -11  -7 -17  218.21    4.03
 -11  -7 -11  168.63    2.65
 -11  -7 -10   14.74    2.08
 -10 -12  10    0.10    1.62
 -10  -7  -2   25.80    2.02
 -10  -6 -16  333.12    4.57
 -10  -6 -10  290.13    3.10
  -9 -15  15   54.88    2.00
  -9 -14  14    1.30    1.76
  -9 -12  12   48.12    1.82
  -9 -11  11    1.48    2.01
  -9 -10   9    7.11    1.57
  -9  -8   5  264.75    2.20
  -9  -7   2  132.34    1.99
  -9  -6  -2  269.97    2.62
  -9  -5 -14   29.26    3.03
  -9  -5 -13    2.74    2.51
  -9  -5 -12    0.67    2.24
  -9  -5 -11  127.53    2.80
  -8 -14  16   35.88    2.31
  -8 -13  15   33.00    1.82
  -8 -12  14   -0.79    1.67
  -8  -7   5  491.87    2.65
  -8  -6   2   19.82    1.68
  -7 -14  17    1.15    1.72
  -7 -10  13   64.86    1.76
  -7  -8  10   32.28    1.65
  -7  -6 -29    1.85    2.87
  -7  -6   5    1.56    1.59
  -7  -5   2  102.54    2.23
  -7  -4  -3  287.82    2.91
  -6 -12  17   46.80    2.18
  -6 -11  16   37.45    1.71
  -6  -8  12   76.25    2.07
  -6  -7  10  161.37    1.96
  -6  -6 -31    1.19    2.62
  -6  -5 -28    5.13    2.47
  -6  -5   5   81.25    1.85
  -6  -4 -24   13.64    2.73
  -6  -4   1    1.79    1.77
  -5 -13  19    7.02    2.18
  -5 -12  18    4.42    1.71
  -5  -9  15  119.86    1.88
  -5  -7  12    3.52    1.90
  -5  -5 -30    6.19    2.59
  -5  -3 -22  283.22    3.84
  -5  -3   0  106.30    2.36
  -5  -2  -8  265.09    5.31
  -4 -13  20  103.63    2.59
  -4  -8  15   26.07    1.64
  -4  -3 -25   79.97    2.51
  -3 -13  21   25.41    2.32
  -3  -7  15   60.94    2.06
  -3  -4 -30   24.94    2.34
  -3  -3 -27   85.09    2.51
  -3  -3   6    5.20    2.25
  -3  -2   2  126.10    2.65
  -2 -12  21    9.62    2.22
  -2  -7  16   12.25    1.54
  -2  -3   8  269.74    3.02
  -2  -2 -25   19.60    2.26
  -2  -1 -20  182.24    2.73
  -1 -11  21    0.76    1.74
  -1  -7  17   24.04    1.68
  -1  -5  14  446.92    2.98
  -1  -4  12    2.68    1.95
  -1   0 -15  135.51    2.65
  -1   0  -4  303.17    6.56
   0 -10  21   18.72    2.16
   0  -7  18  315.01    2.81
   0  -5  15  246.97    2.41
   0  -3  11   15.46    1.76
   0  -1   5  445.62    4.80
   0   0 -19   27.34    1.75
   1  -5  16   18.13    1.99
   1  -3 -31    1.52    2.36
   1   0 -21  116.63    2.06
   1   1 -12   19.79    2.30
   1   1  -6  112.65    2.93
   2 -10  22   42.99    2.35
   2  -2 -29   12.15    2.27
   2  -2  11   65.12    2.81
   2  -1 -26    1.56    1.66
   2   0 -22    3.72    2.10
   2   1 -16    0.82    1.64
   3   0 -23   71.05    1.93
   3   1 -18   -0.27    1.64
   4  -9  22   23.26    2.64
   4  -1 -27   -0.27    1.74
   4   1 -19   36.53    1.70
   5  -9  22    4.72    2.61
   5  -1 -27    0.74    1.85
   5   0 -24    4.43    1.80
   5   1 -20   59.21    1.85
   5   2 -12    8.82    1.72
   5   2 -11   40.86    2.19
   5   2  -4  227.26    2.61
   6  -9  22    9.66    2.77
   6  -1 -27    6.12    1.89
   6   0 -24   11.47    1.88
   6   1 -20   48.94    1.83
   6   2 -13    2.69    1.64
   6   2  -2   55.17    2.00
   7   0 -24   82.78    2.10
   7   1 -20   64.46    1.96
   7   2 -14   23.23    1.76
   7   2 -13   21.34    2.06
   7   2  -1  328.07    2.83
   8  -8  21    6.94    3.37
   8   0 -23   25.33    1.96
   8   1 -19    0.35    2.21
   8   1   5  456.23    3.69
   8   2 -14    4.35    1.70
   8   2 -13  273.51    2.36
   8   2  -1   80.16    1.98
   9  -7  20    9.29    4.62
   9  -1  11  362.07    4.71
   9   1 -19   15.72    1.84
   9   2 -13   43.74    1.81
   9   2 -12   30.18    1.77
   9   2  -1   49.67    1.80
  10   0   8  145.25    2.82
  10   1 -18  102.31    2.12
  10   2 -11    0.66    1.67
  10   2 -10   84.30    1.96
  10   2  -3   58.02    1.84
  10   2  -2   44.95    1.84
  11  -1  10   17.27    2.51
  11   0 -20   31.82    2.09
  11   1 -16   20.53    1.89
  11   2  -8   -0.59    1.73
  11   2  -7  166.90    2.16
  11   2  -6   43.29    1.87
  11   2  -5   45.23    1.79
  12  -3  13   25.88    3.32
  12  -1   9    4.19    2.49
  12   0 -19    0.41    2.00
  12   0   6    1.89    2.20
  12   1 -14   -0.32    1.88
  12   1   2   11.44    1.85
  13  -2  10   12.41    2.69
  13   0 -16   10.22    2.09
  13   1 -11   22.61    1.96
  13   1 -10    7.77    1.90
  13   1  -9   10.83    2.35
  13   1  -2   33.92    2.26
  13   1  -1   18.69    1.89
  14  -4  12    1.15    2.88
  14  -1   6    1.93    2.32
  14   0   2  152.24    2.46
  15  -2   6   54.14    2.73
  15  -1   3   24.48    2.56
  15   0  -8    5.22    2.09
  15   0  -7    7.06    2.00
  15   0  -6    1.53    2.09
  15   0  -5    1.82    2.04
  15   0  -4   11.24    2.04
  15   0  -3    1.57    2.06
 -16 -15  -4    1.61    1.96
 -16 -14  -7   24.62    2.53
 -15 -15   1   46.14    2.05
 -15 -14  -1   30.34    1.93
 -15 -13  -4   25.22    2.27
 -15 -12 -20   20.39    2.85
 -15 -12 -10    3.97    1.83
 -15 -12  -9   25.00    2.36
 -14 -14   3    8.33    1.84
 -14 -13   1   19.05    2.19
 -14 -12  -2   16.42    1.82
 -14 -11 -23    5.42    3.67
 -14 -11  -6   40.35    2.24
 -13 -14   6   58.08    1.98
 -13 -12   2    1.94    1.69
 -13 -10 -24    2.57    4.34
 -13 -10  -4   13.06    2.08
 -13  -9 -15  210.29    3.27
 -13  -9 -14   24.92    2.55
 -13  -9 -13   66.36    2.63
 -13  -9 -12    3.14    2.32
 -12 -15  10    6.84    1.86
 -12 -13   7   55.44    1.87
 -12 -10   1    4.45    2.01
 -12  -9  -3    5.48    1.66
 -12  -8 -17   11.60    2.75
 -12  -8 -11   46.91    2.21
 -12  -8 -10    8.95    2.04
 -11 -15  12   14.89    1.88
 -11 -14  11  113.89    2.08
 -11  -8  -2   -0.21    1.56
 -11  -7 -18  107.38    4.07
 -11  -7  -9  260.05    2.88
 -10 -15  14    0.07    1.87
 -10 -14  13    3.84    1.79
 -10 -13  12   87.74    1.94
 -10 -11   9    2.28    1.60
 -10 -10   7  140.73    1.96
 -10  -9   5   79.07    1.80
 -10  -8   2   45.31    1.73
 -10  -6 -17   45.20    3.72
 -10  -6  -9   23.96    2.07
  -9  -5 -15  148.34    4.10
  -9  -5 -10   36.61    2.39
  -9  -5  -9  126.43    2.80
  -8 -11  13   38.28    1.73
  -8  -9  10    3.61    1.58
  -8  -8   8    0.79    1.49
  -8  -5  -2  499.61    3.00
  -7 -13  17    5.50    1.79
  -7 -12  16   93.78    1.93
  -7 -11  15   78.94    1.87
  -7  -9  12   32.97    1.65
  -7  -7   8   35.01    1.63
  -6 -13  18    5.98    1.79
  -6 -10  15   26.35    1.58
  -6  -6   8   12.45    1.62
  -6  -3  -4  369.00    3.46
  -5  -8  14    2.75    1.94
  -5  -6  10  397.62    2.57
  -4  -6  12  543.55    2.85
  -4  -4   7    8.14    1.74
  -3 -10  19   18.82    2.06
  -3  -4   9   55.22    1.91
  -3  -1 -15  153.90    3.08
  -2  -5  13   22.13    1.59
  -2  -4 -31   25.58    2.34
  -2  -3 -28   11.24    2.16
  -2  -1   0  316.96    4.47
  -1 -12  22    4.07    2.28
  -1  -6  16   78.80    2.17
  -1  -4 -32    9.99    1.96
  -1  -2 -26    6.99    2.07
  -1  -1 -22   24.77    1.78
   0 -11  22    1.54    2.19
   0  -6  17   13.91    1.89
   0  -3 -30    6.48    2.28
   0  -2 -27    7.35    2.17
   0   0 -18  198.68    2.69
   1  -9  21    0.76    2.09
   1  -8  20  136.39    2.19
   1  -7  19  195.87    2.51
   1  -2 -28    0.57    2.18
   1  -2  10    7.72    2.14
   1   0 -20   73.17    2.18
   1   1 -11  814.16    4.07
   1   1 -10   66.12    2.52
   1   1  -9  854.61    4.47
   1   1  -8    4.12    2.32
   1   1  -7  560.37    3.81
   2  -5  17   34.94    2.07
   2  -3 -31    2.17    2.37
   2   1 -15  788.34    3.72
   3  -8  21    5.27    2.06
   3  -7  20   12.07    2.05
   3  -4  16    9.81    1.96
   3  -2 -29   43.92    2.08
   3  -2  12  237.94    3.60
   3  -1 -26   25.16    1.86
   3   1 -17  323.86    2.57
   4  -5  18   77.54    2.59
   4  -2 -29   13.74    1.93
   4   0 -23    4.82    1.69
   4   1 -18  327.03    2.52
   5  -2 -29    0.44    1.94
   5   0 -23    2.06    2.10
   5   1 -19   65.92    1.89
   5   2 -10   74.99    1.91
   5   2  -9  313.12    2.52
   5   2  -8  377.96    2.69
   5   2  -7  935.34    3.75
   5   2  -6  774.39    3.58
   5   2  -5  167.20    2.38
   6   0 -23   28.29    1.96
   6   0   8  359.57    5.41
   6   1 -19   30.19    1.80
   6   2 -12  215.44    2.20
   6   2 -11   40.91    1.82
   6   2  -3   56.79    2.09
   7  -1 -26   19.54    2.00
   7   0 -23    2.50    1.86
   7   1 -19   15.21    1.79
   7   2 -12  440.95    2.67
   7   2  -2   42.01    2.00
   8   1 -18    8.50    2.14
   8   2 -12   22.92    1.75
   8   2 -11  170.19    2.15
   8   2  -2    2.82    1.78
   9   0 -22    2.60    1.87
   9   1 -18    6.07    1.77
   9   2 -11    2.06    1.74
   9   2 -10   10.82    1.75
   9   2  -9   14.59    2.14
   9   2  -3   79.52    1.94
   9   2  -2    1.19    1.70
  10   0 -21   37.17    2.07
  10   1 -17    8.65    1.83
  10   1 -16  130.50    2.49
  10   1   4  454.16    3.18
  10   2  -9   15.83    1.80
  10   2  -8  161.44    2.11
  10   2  -7  132.24    2.11
  10   2  -6   77.24    1.88
  10   2  -5  232.10    2.31
  10   2  -4    1.99    1.73
  11  -2  12    5.02    2.80
  11   0 -19    1.69    1.89
  11   0   7  104.65    2.49
  11   1 -15    2.63    1.78
  11   1   3  108.28    2.08
  12  -2  11    7.40    2.85
  12   0 -18    0.96    1.98
  12   0 -17   12.08    2.38
  12   1 -13  121.79    2.25
  12   1 -12    1.04    1.90
  12   1   0    5.07    2.20
  12   1   1  179.97    2.34
  13  -1   7   -0.17    2.57
  13   0 -15   54.99    2.12
  13   0   4  123.05    2.34
  13   1  -8    5.46    1.81
  13   1  -7    1.94    1.94
  13   1  -6   38.88    1.93
  13   1  -5    3.67    1.82
  13   1  -4   80.69    2.04
  13   1  -3   16.99    1.89
  14  -3  10   53.26    3.07
  14  -2   8   38.85    2.51
  14  -1   5    3.74    2.32
  14   0 -12   -0.67    1.87
  14   0 -11    1.26    2.00
  14   0   0  147.05    2.78
  14   0   1    2.85    1.90
  15  -3   8   57.66    2.91
  15  -1   2   14.94    2.59
 -16 -15  -3    5.25    1.98
 -16 -14  -6   16.98    2.45
 -16 -13 -16   51.71    2.72
 -16 -13 -15   36.53    2.64
 -16 -13 -14   25.38    2.54
 -16 -13 -13   33.02    2.50
 -15 -15   2    2.38    2.28
 -15 -12 -21    0.71    2.79
 -15 -12  -8   74.52    2.47
 -14 -15   5   23.36    1.98
 -14 -12  -1    8.96    2.15
 -14 -11  -5   30.24    2.25
 -13 -15   8   13.81    1.89
 -13 -13   5   53.17    1.93
 -13 -12   3    5.00    1.69
 -13 -11   0   26.24    1.78
 -13  -9 -17   86.24    3.15
 -13  -9 -16    0.34    2.40
 -13  -9 -11    0.79    2.04
 -13  -9 -10   35.84    2.21
 -12 -14   9    2.27    1.77
 -12 -13   8   11.87    1.77
 -12 -12   6  114.05    2.00
 -12 -11   4    4.42    1.63
 -12  -9  -2  110.40    2.30
 -12  -8 -18   21.44    3.07
 -12  -8  -9   42.01    2.13
 -12  -8  -8  143.89    2.48
 -11 -13  10   19.68    1.78
 -11 -12   9    0.72    2.06
 -11 -11   7   37.08    1.74
 -11 -10   5    0.72    1.60
 -11  -9   2    1.80    1.63
 -11  -7  -8  142.09    2.39
 -10 -12  11  115.87    1.98
 -10  -8   3    2.22    1.90
 -10  -7  -1    1.74    1.60
 -10  -6  -8   84.47    2.31
  -9 -14  15   12.62    1.91
  -9 -13  14    7.09    1.72
  -9 -12  13   21.95    1.73
  -9 -10  10   24.38    1.66
  -9  -9   8   59.10    1.71
  -9  -8 -30   27.94    3.59
  -9  -8   6  273.46    2.27
  -9  -7   3   18.15    1.68
  -9  -6  -1  197.21    2.17
  -8 -13  16   31.96    2.25
  -8 -12  15   10.47    2.04
  -8 -10  12  102.06    1.86
  -8  -7   6  125.34    1.89
  -8  -6 -26    0.89    3.02
  -8  -6   3   67.49    1.81
  -7 -14  18   16.49    1.90
  -7 -10  14    3.71    1.62
  -7  -6   6  262.97    2.27
  -7  -5 -25   27.77    2.96
  -7  -4  -2  713.11    3.85
  -6  -9  14    1.93    1.56
  -6  -4   2    9.99    1.88
  -6  -3 -17   25.59    3.85
  -5 -12  19    0.04    2.09
  -5 -11  18    4.07    1.63
  -5 -10  17  127.04    2.03
  -5  -6 -32    1.60    2.66
  -5  -5   8    1.63    1.57
  -5  -4 -26  150.66    3.18
  -5  -4   5  494.14    2.95
  -5  -3   1  203.80    2.98
  -4 -12  20   32.49    2.25
  -4 -11  19   26.73    1.79
  -4 -10  18   16.13    1.67
  -4  -9  17  310.03    2.39
  -4  -7  14   31.35    1.67
  -4  -5 -31    1.61    2.24
  -4  -5  10  384.26    2.57
  -4  -4 -28  173.02    2.98
  -4  -3   4  397.90    3.02
  -4  -2 -19    5.29    2.29
  -4  -2  -1  286.62    3.54
  -3 -12  21   50.71    2.46
  -3 -11  20    9.86    1.72
  -3  -9  18   59.40    1.82
  -3  -8  17    2.11    1.95
  -3  -5 -32   17.08    2.36
  -3  -2 -22   40.71    2.19
  -2 -11  21    1.00    2.16
  -2 -10  20   56.48    1.90
  -2  -9  19   14.35    1.68
  -2  -8  18   19.89    1.94
  -2  -6  15  211.79    2.15
  -2  -4  11   30.16    1.80
  -2  -2 -24   19.50    2.22
  -2  -2   5   78.53    2.37
  -2  -1 -19  148.47    2.52
  -1 -10  21   -0.72    2.09
  -1  -9  20   22.23    2.17
  -1  -8  19   91.35    2.27
  -1  -3 -29    5.45    1.81
  -1  -3  10    1.87    1.77
  -1  -2   7  549.29    3.69
  -1  -1   3  247.61    3.97
  -1   0 -14   45.43    2.17
   0  -4 -32    3.52    2.38
   0  -1 -23   37.89    1.79
   1 -10  22   69.47    2.50
   1  -6  18    9.54    2.04
   1  -3 -30    4.12    2.31
   1  -1 -24  103.45    2.36
   1  -1   7    1.91    2.93
   2  -2 -28   23.34    1.90
   2  -1 -25   44.88    1.89
   2   0 -21   87.90    1.93
   2   1 -14  144.27    2.46
   2   1  -2   25.40    2.61
   3  -9  22   27.67    2.24
   3  -6  19   17.56    2.01
   3   0 -22   39.33    1.78
   3   1 -16  389.25    3.04
   4  -1 -26   51.10    1.93
   4   0 -22    6.79    2.09
   4   1   2   61.90    2.86
   5  -4  17    3.87    2.24
   5  -1 -26    1.40    1.74
   5   1 -18   69.45    1.95
   6  -2 -28    5.31    2.37
   6   1 -18   84.53    1.96
   6   1   4  320.76    3.49
   6   2 -10  717.46    3.31
   6   2  -9   33.48    1.91
   6   2  -8  938.00    3.64
   6   2  -7    3.00    2.08
   6   2  -6  283.22    2.82
   6   2  -5   38.14    1.89
   6   2  -4   41.74    1.96
   7  -1 -25   71.13    2.55
   7   0 -22  114.52    2.21
   7   1 -18   14.93    1.71
   7   2 -11  155.62    2.09
   7   2 -10  500.85    2.84
   7   2  -9  228.74    2.61
   7   2  -4    8.04    1.70
   7   2  -3  175.19    2.30
   8  -1 -25    2.78    1.93
   8  -1  11  204.36    4.73
   8   0 -22   32.07    1.94
   8   1 -17   56.72    2.27
   8   2 -10   63.08    1.88
   8   2  -9    0.34    1.66
   8   2  -8   35.21    2.13
   8   2  -7  171.86    2.50
   8   2  -6   14.22    2.12
   8   2  -5  127.70    2.43
   8   2  -4   20.64    1.77
   8   2  -3   83.19    1.94
   9  -2  13   51.36    4.12
   9  -1 -24    0.93    1.91
   9   0 -21    3.24    1.84
   9   0   8   74.90    2.61
   9   1 -17   91.83    2.06
   9   1 -16   64.80    2.36
   9   1   4  301.55    3.18
   9   2  -8  144.32    2.04
   9   2  -7   38.13    1.80
   9   2  -6  267.77    2.42
   9   2  -5   15.86    1.79
   9   2  -4  103.75    2.07
  10   0 -20   16.18    2.00
  10   1 -15    2.51    1.80
  10   1   3   36.27    2.29
  11   0 -18    6.52    1.97
  11   1 -14    7.57    1.80
  11   1 -13   15.08    1.83
  11   1   2  133.54    2.10
  12   0 -16    5.21    1.98
  12   0   5  271.35    2.99
  12   1 -11  214.28    2.41
  12   1 -10    2.07    1.77
  12   1  -9  145.23    2.60
  12   1  -1  173.20    2.60
  13  -4  13    6.85    3.14
  13   0 -14   10.69    2.05
  13   0 -13   21.95    2.49
  13   0   3   59.22    2.47
  14  -1   4   29.01    2.45
  14   0 -10   18.77    2.02
  14   0  -9    2.06    2.00
  14   0  -8   25.30    2.51
  14   0  -7    1.31    2.42
  14   0  -2   22.18    2.36
  14   0  -1    2.50    1.93
  15  -2   5   30.71    2.61
  15  -1   0   56.09    2.73
  15  -1   1   44.18    2.20
 -16 -15  -2   16.18    2.02
 -16 -14  -5    2.60    1.86
 -16 -13 -12    1.35    1.93
 -16 -13 -11    2.99    2.30
 -16 -13 -10    8.81    2.35
 -15 -15   3    7.09    2.36
 -15 -14   0    2.96    1.89
 -15 -13  -2    1.08    2.19
 -15 -12  -7   24.30    1.91
 -15 -12  -6  158.88    2.65
 -14 -15   6   13.82    1.91
 -14 -14   4    7.82    1.79
 -14 -13   2   34.10    1.85
 -14 -12   0  116.68    2.49
 -14 -11  -4   17.42    2.11
 -14 -10 -15  106.03    2.98
 -14 -10 -14    7.81    2.52
 -14 -10 -13   33.67    2.29
 -14 -10 -12    5.44    2.05
 -13 -15   9    2.64    2.32
 -13 -14   7    5.82    1.87
 -13 -11   1  169.77    2.16
 -13 -10  -3    0.30    1.67
 -13  -9 -18    5.65    2.81
 -13  -9  -9   27.14    2.20
 -12 -15  11   16.95    1.92
 -12 -14  10   17.11    1.85
 -12 -12   7   37.03    2.18
 -12 -11   5   42.33    2.15
 -12 -10   2  107.67    1.90
 -12  -9  -1  109.25    2.30
 -12  -8  -7  142.11    2.52
 -11 -14  12   45.00    1.90
 -11 -13  11   29.99    2.16
 -11  -9   3    2.95    1.97
 -11  -8  -1  198.70    2.11
 -11  -7  -7  255.84    2.53
 -11  -7  -6  155.37    2.42
 -10 -14  14   12.57    1.82
 -10 -13  13   11.18    1.75
 -10 -11  10   35.15    1.69
 -10 -10   8    4.65    1.63
 -10  -9   6   90.85    1.81
 -10  -7   0  396.37    2.84
 -10  -6 -18  353.09    6.27
 -10  -6  -7   61.52    2.20
  -9 -11  12  263.21    2.31
  -9  -9   9    5.21    1.91
  -9  -6   0   29.37    2.06
  -9  -5 -16    2.85    3.49
  -9  -5  -8  204.19    2.80
  -9  -5  -7    7.04    2.39
  -8 -14  17   21.35    1.87
  -8 -11  14    9.29    1.68
  -8  -9  11   28.02    1.67
  -8  -8   9   16.70    1.64
  -8  -5  -1   17.13    1.71
  -8  -4 -11    0.11    2.75
  -7 -12  17   23.22    2.17
  -7  -9  13   46.88    1.67
  -7  -8  11   57.34    1.81
  -7  -7   9    6.73    1.52
  -7  -5   3   -0.15    1.64
  -6 -13  19    0.82    1.79
  -6 -12  18   13.72    1.77
  -6 -11  17   49.95    1.86
  -6 -10  16  288.95    2.36
  -6  -8  13    1.55    1.59
  -6  -7  11  318.44    2.31
  -6  -6   9   48.86    2.07
  -6  -5   6   45.13    1.72
  -5 -13  20   25.79    1.90
  -5  -9  16   11.94    1.56
  -5  -7  13   92.08    2.13
  -5  -6  11  547.46    3.06
  -5  -5 -29   35.57    2.68
  -5  -2  -7 1031.33    7.74
  -4 -13  21    6.33    1.92
  -4  -8  16   73.04    1.78
  -4  -3 -24  171.58    2.83
  -3  -6  14   12.52    1.62
  -3  -5  12   34.13    1.75
  -3  -4 -29   23.70    2.24
  -3  -3 -26   20.28    2.16
  -3  -1 -14  386.50    4.13
  -2 -12  22    3.49    2.29
  -2  -7  17   17.32    2.01
  -2  -4 -30    1.99    2.25
  -1 -11  22    2.45    2.20
  -1  -7  18   59.24    2.16
  -1  -4 -31   15.16    2.33
  -1  -2 -25   27.19    2.20
  -1  -1 -21  215.73    2.40
  -1   0 -13   43.71    2.21
   0  -9  21   27.62    2.18
   0  -8  20  193.53    2.66
   0  -4  14    1.38    2.01
   0  -3 -29    0.40    2.25
   0  -2 -26    1.03    2.12
   0  -2   9   30.45    2.33
   0   0 -17    3.68    1.62
   1 -11  23   20.44    2.40
   1  -4  15  218.64    2.71
   1  -2 -27    2.57    2.12
   1   0 -19   20.70    1.70
   2  -9  22   17.81    2.24
   2  -8  21   11.86    2.05
   2  -7  20    0.79    2.01
   2  -3 -30   21.07    2.40
   2   0 -20   26.90    2.09
   2   1 -13  913.65    3.85
   3 -10  23   10.17    2.29
   3  -5  18   61.53    2.55
   3  -2 -28    1.61    1.81
   3  -1 -25   52.94    1.88
   3   0 -21    0.40    1.61
   3   1 -15  407.85    3.10
   4  -3  15   43.65    2.56
   4  -2 -28    9.08    1.86
   4  -1 -25    1.82    2.13
   5  -2 -28    2.22    1.93
   5  -1 -25    7.07    2.22
   5   0 -22   11.37    1.76
   5   1 -17  155.76    2.11
   5   1   3  164.36    3.10
   6  -7  21   11.17    2.89
   6  -6  20   86.10    3.46
   6  -1 -25   74.38    2.08
   6   0 -22   27.48    1.85
   6   1 -17    5.85    1.74
   7  -1  11  226.60    5.71
   7   0 -21    0.72    2.16
   7   0   8  194.33    3.96
   7   1 -17    3.66    1.70
   7   1   4  142.06    2.71
   7   2  -8  133.51    2.12
   7   2  -7   76.55    1.95
   7   2  -6    0.26    1.70
   7   2  -5   17.13    1.74
   8  -1 -24   30.60    2.01
   8   0 -21   15.10    1.82
   8   0   8   15.84    2.65
   8   1 -16    7.79    2.11
   8   1   4   56.48    2.41
   9  -1 -23   -0.57    1.86
   9   0 -20   14.82    1.92
   9   1 -15  137.27    2.46
  10  -1 -22    0.58    1.94
  10  -1  10  119.06    3.21
  10   0 -19   47.06    1.95
  10   0   7  149.10    2.97
  10   1 -14   69.54    1.96
  11   0 -17    2.92    1.88
  11   0   6   77.19    2.44
  11   1 -12  112.00    2.05
  11   1 -11  178.41    2.62
  11   1   1  132.03    2.10
  12  -1   8    1.46    2.56
  12   0 -15   62.22    2.07
  12   1  -8    2.92    1.79
  12   1  -7    8.92    1.79
  12   1  -6   -0.37    1.67
  12   1  -5   25.21    1.90
  12   1  -4    6.68    1.83
  12   1  -3  100.01    2.08
  12   1  -2   14.57    1.86
  13  -2   9    2.11    2.60
  13  -1   6   12.05    2.58
  13   0 -12    3.25    1.97
  13   0 -11   -2.10    2.28
  13   0   2   68.70    2.44
  14  -4  11    2.19    3.26
  14  -2   7   10.41    2.44
  14   0  -6   19.91    2.03
  14   0  -5    0.02    1.92
  14   0  -4    6.87    2.01
  15  -3   7    8.08    2.55
  15  -2   4   25.92    2.66
  15  -1  -8   26.06    2.20
  15  -1  -7   -0.20    2.15
  15  -1  -6    7.37    2.60
  15  -1  -5    1.38    2.48
  15  -1  -4    0.25    2.48
  15  -1  -3    1.69    2.53
  15  -1  -2   21.70    2.58
  15  -1  -1   14.46    2.10
 -16 -14  -4    2.91    1.96
 -16 -13  -9   42.37    2.08
 -16 -13  -8   13.67    2.40
 -15 -14   1   43.87    2.02
 -15 -13  -1   25.29    2.31
 -15 -12  -5   28.11    2.32
 -14 -14   5    2.65    1.80
 -14 -13   3   24.60    1.82
 -14 -11  -3   11.81    2.14
 -14 -10 -17   61.30    3.12
 -14 -10 -16   53.95    2.48
 -14 -10 -11    2.00    2.11
 -14 -10 -10    4.67    2.08
 -13 -14   8   15.33    1.91
 -13 -13   6   17.89    1.79
 -13 -12   4    0.79    1.67
 -13 -11   2   79.03    2.31
 -13 -10  -2   41.05    1.79
 -13  -9  -8   78.96    1.93
 -13  -9  -7   91.94    2.39
 -12 -13   9   -1.46    1.68
 -12 -10   3   32.53    2.03
 -12  -8 -19   24.08    3.21
 -12  -8  -6  178.95    2.47
 -11 -12  10    3.28    1.69
 -11 -11   8   75.09    1.88
 -11 -10   6   75.89    1.80
 -11  -8   0   24.05    1.65
 -11  -7 -19  198.20    4.85
 -10 -10   9   61.05    1.78
 -10  -8   4  205.85    2.10
 -10  -6  -6   73.38    1.92
  -9 -14  16    2.70    1.80
  -9 -13  15    2.80    1.75
  -9 -12  14    6.54    1.72
  -9 -10  11    0.51    1.63
  -9  -8   7  189.87    2.06
  -9  -7   4   37.83    1.73
  -8 -10  13  112.44    1.89
  -8  -7 -29   15.20    3.01
  -8  -7   7  399.83    2.45
  -8  -6   4    0.90    1.64
  -8  -5 -21    5.72    4.18
  -8  -5   0  635.02    3.48
  -8  -4 -12  126.66    3.49
  -8  -4 -10  439.45    4.32
  -7 -13  18   30.07    1.86
  -7 -11  16   11.42    1.71
  -7 -10  15    1.47    1.97
  -7  -7 -31    2.98    2.70
  -7  -6 -28    0.71    2.74
  -7  -6   7    0.43    1.57
  -7  -4  -1  347.95    3.17
  -6  -9  15    4.85    1.55
  -6  -6 -30    1.40    2.55
  -6  -5 -27   61.37    2.86
  -6  -4 -23  215.45    3.80
  -6  -4   3   79.52    2.37
  -6  -3  -3  536.04    3.85
  -5  -8  15   44.80    1.66
  -5  -3 -21    3.66    2.29
  -4 -11  20    6.43    2.14
  -4 -10  19   11.67    2.06
  -4  -6  13   22.57    1.71
  -4  -4   8   19.53    1.71
  -4  -2 -18   27.36    2.59
  -3 -10  20   36.64    2.16
  -3  -7  16  100.74    1.83
  -3  -4  10  377.55    2.69
  -3  -3   7    3.03    1.84
  -3  -2 -21   14.68    2.45
  -3  -2   3    9.13    2.08
  -2  -5 -32   -0.23    2.32
  -2  -3 -27   71.72    2.45
  -2  -3   9   10.75    1.86
  -2  -2 -23   48.61    2.28
  -2  -1 -18  383.58    3.33
  -1  -5  15    6.03    1.59
  -1  -4  13  176.12    2.21
  -1  -3 -28   26.50    2.26
  -1   0 -12    4.29    2.08
   0 -10  22    7.80    1.81
   0  -7  19   61.81    1.81
   0  -5  16   55.16    1.81
   0  -4 -31   -1.01    2.31
   0  -1 -22   42.66    1.81
   0   0 -16    5.67    2.03
   1  -3  13    4.30    2.03
   1  -1 -23    4.23    2.05
   1   0 -18    2.30    2.07
   2 -10  23   24.41    2.36
   2  -6  19    0.91    1.98
   2  -2 -27   14.38    1.79
   2  -1 -24   48.41    1.83
   2   1 -12  313.02    2.70
   2   1  -3  384.91    3.93
   3  -3 -30   25.83    2.06
   3  -1 -24    1.63    2.11
   3   1 -14  873.25    3.91
   3   1   0   33.61    2.52
   4  -7  21   86.67    2.79
   4  -4  17  188.70    3.19
   4  -2  13   34.20    2.76
   4   0 -21    7.48    1.77
   4   1 -16  311.82    2.51
   5  -8  22   -0.46    2.48
   5  -7  21   49.62    2.43
   5  -6  20   24.60    2.48
   5  -2 -27    0.32    2.29
   5   0 -21   37.48    1.79
   5   1 -16    2.29    1.64
   6  -8  22    3.24    2.98
   6  -2 -27   -0.56    1.97
   6  -1 -24   11.43    2.23
   6   0 -21  104.35    2.09
   6   1 -16    1.16    1.73
   7  -7  21    2.48    3.17
   7  -6  20   11.01    3.11
   7  -1 -24   24.22    1.94
   7   1 -16   40.20    1.82
   8  -1 -23   -0.81    1.86
   8   0 -20    7.82    1.81
   8   1 -15  162.55    2.11
   9  -1 -22   22.33    2.40
   9   0 -19   98.46    2.07
   9   1 -14  101.73    2.03
   9   1   3  184.00    2.76
  10  -1 -21   44.81    2.05
  10   0 -18   28.36    1.96
  10   1 -13    1.40    1.74
  10   1 -12   32.07    2.21
  10   1   2  429.60    3.03
  11  -4  15   27.15    3.82
  11  -1 -20    5.98    1.99
  11  -1   9    7.33    2.48
  11   0 -16    5.49    1.90
  11   1 -10  165.41    2.26
  11   1  -9  265.88    2.79
  11   1  -1   72.97    2.28
  11   1   0   80.83    2.00
  12  -4  14    5.56    3.36
  12  -1 -18    2.03    2.08
  12   0 -14    8.42    1.92
  12   0 -13   79.89    2.54
  12   0   4    5.65    2.28
  13  -5  14    8.51    3.25
  13  -3  11  118.75    3.37
  13  -1 -15   35.64    2.09
  13   0 -10    6.60    1.89
  13   0  -9    5.44    2.31
  13   0   0   18.35    2.29
  13   0   1   42.59    2.01
  14  -3   9   53.73    3.08
  14  -1 -12   -0.27    2.02
  14  -1 -11    4.85    2.49
  14  -1   2   69.84    2.63
  14  -1   3   -0.08    1.96
  15  -3   6   70.29    2.92
  15  -2   3    8.72    2.59
 -16 -14  -3    4.39    1.90
 -16 -13  -7  136.23    2.82
 -15 -15   4    7.84    1.93
 -15 -14   2    0.42    1.82
 -15 -12  -4  192.08    2.69
 -15 -11 -14   52.89    2.80
 -15 -11 -13   13.88    2.57
 -14 -15   7   14.25    2.00
 -14 -12   1   41.75    1.88
 -14 -11  -2    3.13    2.06
 -14 -10 -18   29.82    3.03
 -14 -10  -9   23.38    1.81
 -14 -10  -8    3.08    2.04
 -13 -13   7   54.56    1.94
 -13 -12   5   28.45    1.79
 -13 -10  -1   16.54    1.70
 -13  -9 -19    5.42    2.84
 -13  -9  -6   82.10    2.28
 -12 -14  11   48.07    1.93
 -12 -12   8   82.04    1.98
 -12 -11   6   43.67    1.81
 -12  -9   0  104.90    1.94
 -12  -8  -5  223.65    2.66
 -11 -14  13   34.74    1.91
 -11 -13  12   58.86    1.94
 -11  -9   4   12.50    1.65
 -11  -7  -5  254.66    2.40
 -10 -14  15    0.28    1.80
 -10 -13  14   22.54    1.86
 -10 -11  11   24.76    1.71
 -10  -9   7   80.22    1.79
 -10  -8 -27    2.93    4.06
 -10  -7   1    3.05    1.61
 -10  -6  -5   20.84    1.68
  -9 -11  13    2.25    1.66
  -9  -6   1  313.99    2.71
  -9  -5  -6  251.09    2.92
  -8 -13  17   21.00    1.84
  -8 -12  16   49.24    1.88
  -8 -11  15    1.31    1.64
  -8  -9  12   39.44    1.67
  -8  -8  10    4.20    1.59
  -8  -4 -13    4.02    3.15
  -8  -4  -9   17.58    2.41
  -8  -4  -8  193.65    3.18
  -7  -8  12   49.62    1.71
  -7  -7  10  120.73    1.89
  -7  -5   4   35.71    1.70
  -6 -12  19   10.33    1.78
  -6 -11  18    7.02    1.70
  -6  -7  12  110.55    1.86
  -6  -5   7   71.16    1.85
  -5 -13  21   13.24    2.34
  -5 -12  20   16.54    1.79
  -5 -11  19    7.65    1.72
  -5 -10  18    7.81    1.68
  -5  -5   9    0.82    1.59
  -5  -4   6  204.27    2.27
  -5  -3   2  734.28    3.75
  -5  -2  -6  889.00    6.74
  -4 -12  21   17.53    1.87
  -4  -9  18   92.36    1.98
  -4  -7  15   34.67    1.62
  -4  -5 -30   50.92    2.45
  -4  -5  11  206.82    2.17
  -4  -4 -27    0.04    2.03
  -4  -3   5  866.14    3.87
  -4  -2   0  138.93    2.91
  -3 -12  22    0.75    2.27
  -3 -11  21   19.05    1.89
  -3  -9  19    9.31    1.67
  -3  -8  18   44.13    2.06
  -3  -5 -31    7.87    2.32
  -3  -3 -25  234.54    2.91
  -3  -1 -13   56.38    2.81
  -2 -11  22    0.21    2.20
  -2 -10  21    2.14    1.74
  -2  -9  20  110.56    2.08
  -2  -8  19   19.33    2.08
  -2  -6  16   19.79    1.66
  -2  -5  14  118.44    1.89
  -2  -4  12   55.95    2.14
  -1  -9  21  138.24    2.56
  -1  -6  17   41.40    1.70
  -1  -4 -30    8.49    2.34
  -1  -1 -20   59.76    1.94
  -1   0 -11   30.64    2.32
  -1   0  -5  123.43    4.53
   0 -11  23   34.67    2.00
   0  -6  18  226.86    2.60
   0  -3  12   22.82    1.69
   1  -9  22   47.36    2.30
   1  -8  21    0.76    1.66
   1  -7  20   16.32    2.08
   1  -5  17    9.15    1.63
   1  -4 -31    4.74    2.36
   1  -3 -29    9.09    1.85
   1  -2 -26   17.97    1.78
   2  -4  16    9.17    1.92
   2  -3 -29    3.98    2.31
   2  -3  14   41.54    2.07
   2  -1 -23   37.70    2.18
   2   0 -19   18.98    1.70
   2   1 -11  940.00    4.08
   3  -2 -27   50.24    1.97
   3   0 -20    9.47    1.69
   3   1 -13  114.40    2.38
   4  -8  22   39.56    2.33
   4  -6  20    1.72    2.36
   4  -3 -29   13.85    2.39
   4  -2 -27    8.74    1.84
   4  -1 -24    1.31    1.69
   4   0 -20   11.24    1.70
   4   1 -15   20.02    1.81
   5  -9  23    0.33    2.67
   5  -1 -24   49.74    1.99
   5   0 -20   33.64    2.12
   5   1 -15    4.62    1.65
   6  -5  19    0.68    2.81
   6   0 -20   28.33    1.85
   6   1 -15    7.45    1.70
   6   1   3  131.61    2.77
   7  -2 -26    2.03    1.91
   7  -1 -23   63.84    2.03
   7   0 -20   44.38    1.88
   7   1 -15   11.32    1.73
   8  -2 -25    5.64    2.03
   8   0 -19    6.27    1.75
   8   1 -14    9.84    1.74
   8   1   3  185.76    2.81
   9   0 -18    1.48    1.76
   9   1 -13   51.26    1.82
   9   1   2  211.05    2.74
  10  -1 -20    0.02    1.93
  10   0 -17   35.28    1.93
  10   1 -11    0.05    1.75
  10   1   1    2.43    1.79
  11  -1 -19    1.56    1.94
  11   0 -15    9.09    1.90
  11   0   5    1.04    2.20
  11   1  -8   26.18    1.83
  11   1  -7   89.91    2.02
  11   1  -5   22.14    1.79
  11   1  -4    1.16    1.78
  11   1  -3    2.48    1.68
  11   1  -2    2.30    1.74
  12  -2  10    2.91    2.47
  12  -1 -17   20.14    2.07
  12  -1   7   43.36    2.65
  12   0 -12    7.00    1.82
  12   0   3   60.27    2.32
  13  -1 -14    3.63    2.01
  13  -1   5   37.00    2.43
  13   0  -8   19.15    2.00
  13   0  -7    7.66    1.82
  13   0  -6   15.33    1.92
  13   0  -5   51.80    2.43
  13   0  -4   23.29    2.29
  13   0  -3   62.25    2.46
  13   0  -2    4.57    2.31
  13   0  -1    0.48    1.79
  14  -2   6   20.55    2.50
  14  -1 -10   16.02    2.08
  14  -1  -9   13.54    2.10
  14  -1   1   14.46    2.40
  15  -2   1    0.56    2.52
  15  -2   2    0.65    2.13
 -16 -14  -2   -0.31    1.92
 -16 -13  -6    3.77    1.94
 -16 -13  -5  126.70    2.79
 -15 -14   3   33.16    2.38
 -15 -13   0   23.46    1.94
 -15 -12  -3    4.30    2.22
 -15 -11 -16   75.54    2.95
 -15 -11 -15    2.85    2.24
 -15 -11 -12   11.52    2.30
 -15 -11 -11    1.42    2.16
 -15 -11 -10    1.08    2.18
 -15 -11  -9    2.56    2.17
 -14 -14   6   29.56    1.91
 -14 -13   4    0.63    1.73
 -14 -12   2   87.16    1.98
 -14 -11  -1    4.87    2.07
 -14 -10 -19    1.47    2.91
 -14 -10  -7   36.12    2.18
 -13 -14   9    7.60    1.80
 -13 -11   3   91.75    1.94
 -13 -10   0   72.50    2.22
 -13  -9  -5   34.38    2.12
 -12 -13  10    0.09    1.74
 -12 -10   4   20.04    1.67
 -12  -9   1  153.62    2.33
 -12  -8  -4   28.70    2.09
 -11 -12  11   34.06    1.77
 -11 -11   9   35.42    1.76
 -11 -10   7   35.20    1.75
 -11  -9   5   34.01    2.10
 -11  -8   1  196.02    2.06
 -11  -7  -4   80.53    1.91
 -10 -12  13   50.11    1.86
 -10 -10  10   10.40    2.03
 -10  -9   8   72.63    2.11
 -10  -8   5   12.59    1.70
 -10  -6  -4   51.03    2.03
  -9 -14  17   36.05    1.99
  -9 -13  16    1.59    1.80
  -9 -12  15   -0.62    1.72
  -9 -10  12   97.10    1.87
  -9  -9  10    4.63    1.55
  -9  -8   8   53.95    1.73
  -9  -7   5  261.07    2.22
  -9  -5  -5   10.57    2.06
  -8 -10  14   33.61    1.72
  -8  -7   8  110.70    1.82
  -8  -6   5    9.35    1.63
  -8  -5   1    1.37    2.03
  -8  -4  -7  193.90    3.08
  -7 -13  19    4.47    1.82
  -7 -12  18   73.19    2.02
  -7 -11  17   84.77    1.99
  -7  -9  14    4.82    1.57
  -7  -6   8  188.01    2.36
  -7  -4 -19  185.17    5.15
  -7  -4   0  217.17    2.85
  -6 -13  20    1.26    1.83
  -6  -9  16   10.08    2.00
  -6  -8  14   15.62    1.64
  -6  -6  10   -0.86    1.60
  -6  -3  -2  606.08    3.88
  -5  -9  17  263.49    2.31
  -5  -7  14    4.87    1.59
  -5  -6 -31   16.09    2.36
  -5  -6  12  352.55    2.47
  -5  -4 -25   73.73    2.49
  -4  -8  17   29.98    1.68
  -4  -6 -32   11.38    2.37
  -4  -3 -23  127.20    2.62
  -3  -6  15   59.42    1.78
  -3  -5  13  118.65    1.95
  -3  -4 -28  117.85    2.67
  -2  -7  18    2.76    1.99
  -2  -4 -29   35.60    2.30
  -2  -3 -26    8.13    2.09
  -2  -2   6    1.98    1.99
  -2  -1 -17  111.32    2.51
  -1 -11  23    5.22    2.30
  -1 -10  22    0.49    1.74
  -1  -8  20   45.69    1.83
  -1  -5 -32   29.63    2.50
  -1  -3 -27   24.64    2.22
  -1  -3  11  194.01    2.37
  -1  -2 -24    1.93    1.71
  -1  -2   8  301.75    3.21
  -1   0 -10   21.10    2.40
   0  -3 -28    0.55    1.79
   0  -2 -25   10.43    1.73
   0  -1 -21   64.10    1.81
   0   0 -15   74.78    2.03
   1 -10  23    4.45    2.20
   1  -6  19  189.68    2.60
   1  -1 -22   81.14    1.97
   1   0 -17    8.90    1.64
   2  -5  18  193.81    2.67
   2  -2 -26   27.13    1.93
   2   0 -18  106.44    2.35
   2   1 -10   80.50    2.20
   2   1  -9  238.84    2.71
   2   1  -8    2.86    2.36
   2   1  -5  411.37    3.87
   2   1  -4   27.13    2.44
   3  -9  23   17.08    2.27
   3  -8  22   76.56    2.45
   3  -7  21   27.08    2.16
   3  -6  20    4.66    2.36
   3  -3 -29    9.82    1.92
   3  -3  15   31.61    2.32
   3  -2 -26    0.13    2.20
   3  -1 -23    3.36    2.09
   3   0 -19  130.02    2.00
   3   1 -12  562.24    3.38
   4  -9  23    9.53    2.25
   4  -2 -26    3.27    2.18
   4  -1 -23    0.02    2.09
   4   1 -14  200.17    2.30
   4   1   1   14.41    2.56
   5  -5  19   20.89    2.43
   5  -2 -26   17.01    1.87
   5  -1 -23   51.42    2.34
   5   1 -14    0.79    1.66
   5   1   2   15.12    2.46
   6  -2 -26   29.15    1.97
   6  -1 -23  162.02    2.31
   6   1 -14  134.92    2.07
   7  -8  22    2.16    3.06
   7  -5  19  100.05    4.25
   7  -2 -25   40.44    2.05
   7   0 -19    4.38    1.77
   7   1 -14  153.74    2.13
   7   1   3    9.58    2.14
   8   0 -18   93.15    2.03
   8   1 -13  115.50    2.01
   9  -1 -21   28.24    1.97
   9   0 -17  200.31    2.27
   9   0   7   31.76    2.14
   9   1 -12   26.54    1.82
   9   1 -11    2.98    2.10
  10  -2 -22    1.26    1.99
  10  -2  12   17.93    3.16
  10  -1 -19   19.56    2.36
  10   0 -16    1.26    1.76
  10   0   6    8.05    2.17
  10   1 -10  249.31    2.38
  10   1  -9   15.50    1.78
  10   1  -8  197.48    2.61
  10   1  -1   13.86    2.13
  10   1   0  174.13    2.28
  11  -2  11   29.43    2.91
  11  -1 -18    5.73    1.93
  11   0 -14   51.50    1.98
  11   0 -13   14.98    2.28
  12  -5  15    1.39    3.73
  12  -3  12   41.23    2.95
  12  -1 -16    8.08    1.98
  12  -1 -15   34.15    2.50
  12   0 -11   36.06    1.97
  12   0 -10    5.61    1.82
  12   0   2    1.84    2.18
  13  -2   8    9.54    2.31
  13  -1 -13    7.24    2.03
  13  -1   4   11.85    2.29
  14  -4  10    1.57    2.92
  14  -3   8   44.58    2.70
  14  -2   5    4.08    2.46
  14  -1  -8   16.80    2.02
  14  -1  -7   29.59    2.14
  14  -1  -6   27.02    2.53
  14  -1  -5    3.75    2.52
  14  -1  -4   20.15    2.49
  14  -1  -3   10.18    2.46
  14  -1  -2    1.15    2.45
  14  -1  -1   18.64    2.44
  14  -1   0   49.86    2.12
  15  -3   5    3.30    2.57
  15  -2  -5    7.06    2.69
  15  -2  -4   52.87    2.84
  15  -2  -3    8.43    2.65
  15  -2  -2   44.16    2.72
  15  -2  -1    5.74    2.58
  15  -2   0   23.52    2.25
 -16 -14  -1   14.92    1.99
 -16 -13  -4    1.94    2.28
 -15 -14   4    0.98    2.26
 -15 -13   1   48.82    1.97
 -15 -12  -2   57.71    1.96
 -15 -11 -18   36.13    2.94
 -15 -11 -17    0.80    2.31
 -15 -11  -8   32.58    2.27
 -14 -14   7    8.25    1.85
 -14 -13   5   17.79    1.84
 -14 -12   3   20.11    2.24
 -14 -10  -6   26.60    1.77
 -14 -10  -5    8.39    2.12
 -13 -14  10   -1.97    2.27
 -13 -13   8    8.52    1.79
 -13 -12   6    3.42    1.74
 -13 -11   4   66.34    1.86
 -13 -10   1   42.85    2.15
 -13  -9 -20    0.41    3.06
 -13  -9  -4    9.56    1.61
 -12 -14  12    3.97    1.85
 -12 -13  11    6.46    2.24
 -12 -12   9    3.39    1.75
 -12 -11   7   27.62    1.75
 -12 -10   5   29.07    2.08
 -12  -8 -20    2.07    3.25
 -12  -8  -3   65.28    2.26
 -11 -14  14   38.17    2.00
 -11 -13  13   18.96    1.88
 -11 -11  10   21.63    1.72
 -11 -10   8   94.83    1.89
 -11  -8   2    2.74    1.68
 -11  -7  -3  107.79    2.00
 -10 -14  16   -0.35    1.86
 -10 -13  15    3.12    1.77
 -10 -11  12   87.33    1.87
 -10  -7   2  315.92    2.36
 -10  -6  -3    9.31    1.97
  -9 -11  14   86.80    1.90
  -9  -7   6    2.38    1.96
  -9  -6   2   12.15    1.68
  -9  -5  -4   66.77    2.20
  -8 -13  18   38.42    1.94
  -8 -12  17   15.02    1.83
  -8 -11  16   11.95    1.69
  -8  -9  13   56.47    2.08
  -8  -8 -31   19.08    3.17
  -8  -8  11   43.28    1.67
  -8  -4 -14    1.40    3.80
  -8  -4  -6    9.32    2.06
  -7 -10  16    5.00    1.61
  -7  -8  13   10.33    1.57
  -7  -5 -24   48.82    2.98
  -7  -5   5   86.12    1.86
  -6  -4   4  147.93    2.18
  -5 -12  21    1.36    2.18
  -5 -11  20    9.40    2.21
  -5 -10  19   36.71    2.12
  -5  -8  16    1.29    1.59
  -5  -5 -28   29.62    2.34
  -5  -5  10   99.73    1.87
  -5  -4   7  344.96    2.55
  -5  -3 -20   84.13    2.99
  -5  -2  -5  638.50    5.52
  -4 -11  21   18.21    2.23
  -4 -10  20    5.20    1.69
  -4  -7  16   83.94    2.17
  -4  -6  14   28.62    1.64
  -4  -4   9  172.85    2.17
  -4  -2 -17  167.11    3.29
  -3 -10  21   34.79    2.26
  -3  -7  17    2.89    1.53
  -3  -4  11   78.83    1.89
  -3  -3   8  139.75    2.29
  -3  -2 -20    4.80    2.07
  -3  -1 -12  312.22    4.27
  -2  -5 -31   49.76    2.53
  -2  -2 -22    8.32    2.11
  -2  -1   1 1378.82    7.36
  -1  -7  19   15.46    1.69
  -1  -1 -19  346.07    2.90
  -1   0  -9  205.23    3.36
  -1   0  -8  229.30    3.92
  -1   0  -7  120.37    3.75
  -1   0  -6  191.73    4.48
   0 -10  23   33.06    2.40
   0  -9  22    1.43    1.73
   0  -8  21   42.61    2.27
   0  -4 -30    0.03    1.86
   0  -4  15  431.91    3.17
   0  -1   6  708.79    5.25
   0   0 -14   71.78    2.26
   1  -4 -30   11.47    2.40
   1  -3 -28    3.20    1.81
   1  -2 -25   19.64    1.75
   1  -2  11    0.42    2.08
   1   0 -16  140.62    2.44
   2  -9  23   60.21    2.50
   2  -8  22   10.12    2.11
   2  -7  21    7.41    2.07
   2  -3 -28   41.29    2.41
   2  -2  12   64.34    2.68
   2  -1 -22   31.94    1.77
   2   1  -7  164.94    2.56
   2   1  -6   79.31    2.36
   3  -4  17  197.33    2.81
   3  -3 -28   22.06    2.36
   3   0 -18    1.50    2.05
   3   1 -11   15.17    1.81
   3   1  -1   23.97    2.39
   4  -5  19   11.29    2.35
   4  -3 -28   -0.56    1.86
   4   0 -19    5.15    1.65
   4   1 -13   47.66    1.88
   5  -3 -28   -0.24    1.88
   5   0 -19   95.34    2.01
   5   1 -13   67.05    1.89
   6  -3  16   96.75    4.24
   6  -2 -25   14.58    1.90
   6  -1 -22   12.27    1.71
   6   0 -19   94.94    2.00
   6   1 -13   91.57    1.94
   7  -1 -22    8.48    1.79
   7   0 -18   15.87    1.76
   7   1 -13   39.40    1.81
   8  -7  21   27.12    4.37
   8  -6  20    0.81    4.55
   8  -2 -24    2.17    1.91
   8  -1 -21    0.41    1.85
   8   0 -17  100.04    2.06
   8   1 -12    4.31    1.73
   8   1 -11   30.68    2.17
   8   1   2   18.54    1.78
   9  -2 -23    5.69    1.99
   9  -1 -20   27.05    1.91
   9  -1  10   12.98    2.70
   9   0 -16    0.47    1.79
   9   1 -10    6.96    1.79
   9   1  -9   26.40    2.18
   9   1   0   12.77    2.06
   9   1   1  112.31    2.11
  10  -3  14    0.17    3.32
  10  -2 -21   25.81    2.08
  10  -1 -18    4.95    2.25
  10   0 -15   11.96    1.83
  10   0 -14    6.40    1.80
  10   1  -7   40.47    1.89
  10   1  -6   83.70    1.94
  10   1  -5    5.18    1.74
  10   1  -4  127.28    2.14
  10   1  -3   12.24    1.78
  10   1  -2    7.88    1.75
  11  -3  13   21.02    2.96
  11  -1 -17    1.49    1.94
  11  -1   8  104.20    2.91
  11   0 -12   76.93    2.06
  11   0   4    3.98    1.84
  12  -1 -14   11.90    1.99
  12  -1   6   12.03    2.38
  12   0  -9    0.73    1.82
  12   0  -8   15.02    1.87
  12   0  -7   17.23    2.29
  12   0   0   12.54    2.19
  12   0   1    0.79    1.74
  13  -4  12    1.99    2.80
  13  -3  10    0.17    2.68
  13  -1 -11    5.03    1.89
  13  -1 -10    1.26    2.30
  13  -1   3  107.87    2.67
  14  -2   4    3.28    2.41
  15  -3   3    2.42    2.67
  15  -3   4   69.33    2.49
 -16 -14   0    3.81    1.88
 -16 -13  -3   36.51    2.46
 -16 -12 -15   32.19    2.51
 -16 -12 -14    0.49    2.28
 -16 -12 -13   40.88    2.52
 -16 -12 -12    0.10    2.30
 -16 -12 -11    9.39    2.33
 -16 -12 -10    1.72    2.32
 -15 -13   2   12.61    1.89
 -15 -12  -1   37.50    1.93
 -15 -11  -7   -0.43    1.77
 -15 -11  -6   62.78    2.34
 -14 -13   6    1.57    1.83
 -14 -11   0   18.50    1.73
 -14 -10  -4   46.24    2.19
 -13 -13   9   14.72    1.88
 -13 -12   7   80.43    1.99
 -13  -9  -3    3.73    1.66
 -12  -9   2   59.44    1.80
 -12  -8  -2    3.58    2.01
 -11 -12  12    3.94    1.70
 -11  -9   6    2.07    1.60
 -11  -7  -2   21.73    1.73
 -10 -12  14    2.22    1.72
 -10 -10  11    2.57    1.61
 -10  -9   9   42.14    1.74
 -10  -8   6  483.39    2.66
 -10  -7   3   17.84    1.64
 -10  -6  -2   62.25    2.08
  -9 -13  17   28.45    1.86
  -9 -12  16    2.50    1.69
  -9 -10  13   -1.47    1.66
  -9  -9  11   13.93    1.60
  -9  -8 -29    1.64    3.57
  -9  -8   9   82.57    1.81
  -9  -7 -26    0.85    3.49
  -9  -6 -22   46.85    5.06
  -9  -5  -3  231.30    2.69
  -8 -10  15   58.75    1.81
  -8  -7   9   14.02    1.58
  -8  -6 -25    2.58    3.25
  -8  -6   6   28.48    1.68
  -8  -5   2  264.95    2.38
  -8  -4  -5  133.67    2.53
  -7 -12  19   12.44    1.80
  -7  -9  15   21.56    1.63
  -7  -7 -30    1.15    2.89
  -7  -4   1  397.93    2.78
  -6 -12  20    2.89    1.80
  -6 -11  19   22.75    1.79
  -6 -10  18  168.03    2.20
  -6  -8  15    5.18    1.59
  -6  -7  13  200.11    2.03
  -6  -6 -29    8.34    2.53
  -6  -6  11  288.67    2.30
  -6  -5 -26    0.98    2.38
  -6  -5   8   58.97    1.75
  -6  -4 -22   66.36    3.00
  -6  -3 -16    0.95    3.69
  -6  -3  -1   18.73    1.93
  -5  -9  18    1.24    1.62
  -5  -3   3   37.59    2.02
  -4 -12  22   13.97    1.93
  -4  -9  19   16.25    1.66
  -4  -5 -29    8.54    2.24
  -4  -5  12  206.91    2.17
  -4  -4 -26  314.35    3.37
  -4  -3   6    0.80    1.82
  -4  -2   1   30.42    2.52
  -3 -11  22   -0.13    1.77
  -3  -9  20   30.48    1.84
  -3  -8  19    3.61    2.08
  -3  -6 -32   48.21    2.55
  -3  -5 -30   46.55    2.40
  -3  -3 -24    1.28    2.05
  -3  -2   4  103.82    2.43
  -2 -11  23    2.78    2.30
  -2 -10  22   10.59    1.77
  -2  -9  21   56.97    1.91
  -2  -6  17  130.68    2.31
  -2  -5  15  112.83    1.89
  -2  -3  10  311.06    2.74
  -2  -1 -16  294.01    3.25
  -1  -5  16  559.42    3.09
  -1  -4 -29    7.56    2.23
  -1  -4  14  132.27    2.07
  -1  -2 -23    3.15    1.67
  -1  -1   4    9.60    2.45
   0 -11  24    0.81    2.28
   0  -7  20  171.76    2.26
   0  -5  17  143.49    2.14
   0  -3 -27   13.45    1.82
   0  -2 -24   -1.94    1.71
   0  -2  10    8.96    2.24
   0  -1 -20   23.04    1.71
   1  -4  16    3.63    1.96
   1  -1 -21    1.30    1.69
   2 -10  24   15.48    2.32
   2  -4 -30    5.96    1.90
   2  -2 -25    5.73    1.66
   2  -1   9   84.89    3.40
   2   0 -17  303.07    2.43
   3  -4 -30   42.99    2.13
   3  -2 -25   15.52    2.14
   3  -1 -22   25.25    1.74
   3   1 -10   17.97    1.91
   3   1  -2  107.96    3.01
   4  -2 -25    4.04    1.80
   4  -1 -22  126.50    2.16
   4   0 -18   69.58    1.86
   4   1 -12    3.08    1.67
   5  -3  16  361.46    4.76
   5  -2 -25    2.46    1.85
   5  -1 -22  173.79    2.26
   5   0 -18   23.91    1.77
   5   1 -12    6.32    1.73
   6  -3 -27    1.29    1.82
   6   0 -18    6.57    1.71
   6   1 -12  240.87    2.35
   6   1   2   34.40    2.06
   7  -3 -26    2.24    1.88
   7  -2 -24    2.45    1.82
   7  -1 -21   11.24    1.80
   7   0 -17   -1.02    1.72
   7   1 -12  150.12    2.08
   7   1 -11   75.31    2.24
   7   1   2   33.39    1.91
   8  -2 -23    1.68    1.82
   8  -1 -20   55.47    1.98
   8   0 -16  128.49    2.43
   8   0   7  304.34    3.67
   8   1 -10    1.55    1.66
   8   1   1   61.92    2.28
   9  -2 -22   25.13    1.96
   9  -1 -19   49.19    1.96
   9   0 -15  131.89    2.16
   9   1  -8   80.46    1.96
   9   1  -7   19.14    2.14
   9   1  -1   27.67    2.07
  10  -5  17    3.43    4.88
  10  -1   9  160.47    3.16
  10   0 -13   -1.75    1.81
  10   0   5   16.61    2.20
  11  -5  16    0.54    4.04
  11  -2 -19    2.55    2.01
  11  -1 -16   19.91    1.94
  11   0 -11   22.46    1.90
  11   0 -10   68.40    2.38
  11   0   3   18.51    2.22
  12  -2 -17    7.46    2.01
  12  -2   9    1.14    2.58
  12  -1 -13   31.62    2.00
  12   0  -6    3.08    1.75
  12   0  -5   81.18    2.05
  12   0  -4   49.30    2.01
  12   0  -3  159.72    2.26
  12   0  -2   21.98    1.88
  12   0  -1   74.72    1.96
  13  -2 -14    2.65    2.09
  13  -2   7    6.18    2.31
  13  -1  -9   23.88    2.07
  13  -1  -8    2.76    2.39
  13  -1   2    4.56    2.26
  14  -3   7   34.61    2.67
  14  -2 -10    7.13    2.15
  14  -2  -9   40.17    2.71
  14  -2   3    1.21    2.42
  15  -3   2   22.91    2.65
 -16 -14   1   16.59    2.02
 -16 -13  -2    2.60    1.89
 -16 -12 -17   11.97    2.44
 -16 -12 -16   -0.37    2.34
 -16 -12  -9    3.93    1.93
 -16 -12  -8    3.16    1.91
 -16 -12  -7   32.52    2.46
 -15 -14   5    2.42    1.86
 -15 -13   3   42.30    1.99
 -15 -12   0   21.65    1.88
 -15 -11 -19    0.71    2.67
 -15 -11  -5   -0.49    1.77
 -14 -14   8   14.23    1.87
 -14 -12   4   27.24    1.87
 -14 -11   1   19.60    1.77
 -14 -10 -20    1.30    2.58
 -14 -10  -3    2.03    1.75
 -13 -11   5    1.57    1.65
 -13 -10   2   55.39    1.86
 -13  -9  -2   45.48    1.84
 -12 -14  13   82.88    2.17
 -12 -13  12    3.26    1.81
 -12 -12  10    7.86    1.77
 -12 -11   8  144.31    2.08
 -12 -10   6    5.39    1.68
 -12  -9   3   46.07    1.75
 -12  -8  -1    9.92    1.98
 -11 -13  14   80.99    2.06
 -11 -11  11    6.01    1.67
 -11 -10   9  114.98    1.94
 -11  -8   3  115.86    1.94
 -11  -7 -20   31.72    4.76
 -11  -7  -1    5.64    2.03
 -10 -13  16   -0.59    1.79
 -10 -11  13   31.63    1.78
 -10  -8   7   40.06    1.75
  -9 -11  15    1.50    1.67
  -9  -7   7  320.94    2.36
  -9  -6   3  179.46    2.13
  -9  -5  -2    5.43    2.03
  -8 -13  19    7.23    1.84
  -8 -12  18   91.28    2.13
  -8 -11  17    6.37    2.10
  -8  -7 -28    1.80    3.11
  -8  -4  -4   82.83    2.30
  -7 -13  20    0.55    1.79
  -7 -11  18   13.46    1.80
  -7 -10  17   50.84    1.80
  -7  -6 -27    2.91    2.78
  -7  -6   9   12.97    1.56
  -7  -5   6   29.66    1.66
  -6  -9  17    3.95    1.65
  -6  -7 -31   -0.07    2.64
  -6  -4   5  141.80    2.11
  -5  -8  17   61.90    2.06
  -5  -7  15    6.06    1.59
  -5  -6 -30    2.18    2.61
  -5  -6  13  177.88    2.05
  -5  -4 -24  300.00    3.71
  -5  -2  -4  465.00    4.58
  -4  -8  18   16.41    1.72
  -4  -6 -31   10.53    2.38
  -4  -3 -22   25.32    2.43
  -3  -6  16   85.26    1.86
  -3  -5  14   11.56    1.57
  -3  -4 -27   46.14    2.31
  -3  -1 -11   64.61    3.33
  -3  -1  -3   17.29    3.55
  -2  -8  20    0.18    1.63
  -2  -4 -28   13.14    1.82
  -2  -4  13   17.82    1.67
  -2  -3 -25   27.85    2.21
  -2  -2 -21   56.30    2.26
  -1 -10  23   19.56    2.33
  -1  -9  22   -0.06    1.71
  -1  -8  21  189.67    2.66
  -1  -6  18   23.76    1.68
  -1  -5 -31    5.04    1.95
  -1  -3 -26    4.96    1.74
  -1  -1 -18   69.47    2.01
   0  -6  19   31.29    2.11
   0  -5 -31    3.53    2.34
   0  -4 -29    3.44    2.21
   0  -3  13  259.18    2.81
   0   0 -13   35.72    1.83
   1 -10  24   58.09    2.55
   1  -9  23    4.05    2.18
   1  -8  22   12.24    1.77
   1  -7  21   65.37    2.29
   1  -5  18   -0.79    1.90
   1  -3 -27   59.76    1.96
   1  -3  14  422.71    3.42
   1  -2 -24   57.77    2.24
   1   0 -15  190.24    2.30
   2  -6  20   19.16    2.00
   2  -3 -27   22.15    2.26
   2  -1 -21    1.94    1.64
   2   0 -16   69.70    2.15
   3  -5  19  155.07    2.58
   3  -3 -27    5.03    2.23
   3  -2  13  134.52    3.09
   3  -1 -21    7.95    2.07
   3  -1  10  375.07    5.34
   3   0 -17  268.69    2.40
   3   1  -9   29.87    2.04
   3   1  -8  304.39    2.81
   3   1  -3    6.40    2.68
   4  -4 -29    6.39    2.44
   4  -3 -27   -0.06    1.86
   4   0 -17   39.78    2.10
   4   1 -11   23.99    1.77
   4   1 -10   71.75    1.95
   4   1   0   90.80    2.43
   5  -3 -27    3.93    1.92
   5  -2 -24  103.22    2.47
   5  -1 -21   80.15    2.27
   5   0 -17   15.08    2.12
   5   0   7  535.73    6.51
   5   1 -11  454.91    2.79
   5   1   1  241.40    2.92
   6  -3 -26   14.78    2.38
   6  -2 -24   52.77    2.04
   6  -1 -21  107.40    2.12
   6   0 -17    0.94    1.75
   6   1 -11   39.76    1.81
   6   1   1  313.49    3.34
   7  -2 -23   16.09    1.85
   7  -1 -20    7.00    2.18
   7   0 -16  142.85    2.42
   7   0   7  119.67    3.38
   7   1 -10   32.95    1.77
   7   1   1    2.18    2.32
   8  -2 -22   24.55    2.40
   8  -2  13  120.48    4.97
   8  -1 -19    7.65    2.16
   8   0 -15  172.70    2.51
   8   1  -9   24.02    1.78
   8   1  -8   14.61    1.77
   8   1   0   40.53    1.83
   9  -2 -21    6.87    1.96
   9  -1 -18   29.38    1.90
   9   0 -14    1.43    1.76
   9   0   6  303.99    3.19
   9   1  -6   94.11    1.96
   9   1  -5   18.05    1.78
   9   1  -4   72.23    1.99
   9   1  -3   20.71    1.76
   9   1  -2   86.51    1.91
  10  -2 -20    1.29    1.90
  10  -1 -17    6.99    1.88
  10  -1 -16    5.84    2.33
  10   0 -12   61.65    1.99
  10   0   4  301.94    3.13
  11  -2 -18    3.68    1.95
  11  -1 -15   -1.26    1.91
  11  -1 -14   35.43    2.34
  11  -1   7   31.97    2.70
  11   0  -9    7.91    1.78
  11   0  -8   23.53    2.22
  11   0   1   34.55    2.34
  11   0   2  152.36    2.22
  12  -4  13    5.70    3.03
  12  -3  11   24.74    3.04
  12  -2 -16   53.70    2.21
  12  -2 -15    8.43    2.45
  12  -1 -12    2.52    1.94
  12  -1 -11   10.99    2.33
  12  -1   5  135.82    2.60
  13  -5  13    0.44    2.91
  13  -3   9   83.30    3.07
  13  -2 -13    2.57    1.99
  13  -2 -12   -1.00    2.41
  13  -2   6    9.59    2.36
  13  -1  -7   89.86    2.14
  13  -1  -6   -0.65    1.98
  13  -1  -5  137.08    2.70
  13  -1  -4   17.13    2.36
  13  -1  -3   14.73    2.39
  13  -1  -2   10.85    2.33
  13  -1  -1   14.75    2.42
  13  -1   0    0.24    2.34
  13  -1   1   82.13    2.18
  14  -4   9   32.89    2.66
  14  -3   6   25.79    2.56
  14  -2  -8   12.08    2.09
  14  -2  -7   24.74    2.17
  14  -2  -6    3.07    2.50
  14  -2   0   49.86    2.58
  14  -2   1   14.75    2.53
  14  -2   2   19.94    2.07
  15  -3  -1    4.69    2.67
  15  -3   1    2.71    2.15
 -17 -13 -12   49.50    2.70
 -17 -13 -11    2.72    2.40
 -17 -13 -10    7.81    2.38
 -16 -14   2   22.87    2.07
 -16 -13  -1    4.27    1.86
 -16 -12 -18    3.82    2.39
 -16 -12  -6   16.38    1.95
 -15 -14   6    0.02    1.86
 -15 -13   4    0.81    2.27
 -15 -12   1   27.37    1.91
 -15 -11 -20    0.77    3.11
 -15 -11  -4   68.30    1.99
 -15 -11  -3    1.51    2.21
 -14 -14   9    7.31    1.90
 -14 -13   7    9.64    1.91
 -14 -12   5    7.90    1.79
 -14 -11   2   26.59    1.86
 -14 -10  -2   14.20    1.75
 -13 -13  10   12.36    1.89
 -13 -12   8    6.30    1.77
 -13 -11   6   19.86    1.72
 -13 -10   3   12.55    1.70
 -13  -9 -21    0.51    3.60
 -13  -9  -1   -1.19    1.69
 -12 -12  11    9.08    1.72
 -12 -11   9    0.90    1.70
 -12 -10   7   17.28    2.07
 -12  -9   4   38.35    2.07
 -11 -12  13   18.96    1.80
 -11  -9   7   65.51    1.81
 -11  -8   4   21.44    1.73
 -11  -7   0   63.04    2.14
 -10 -12  15   17.09    1.80
 -10 -10  12   -1.05    1.58
 -10  -9  10   43.96    1.75
 -10  -7   4   42.86    1.71
 -10  -6  -1   82.50    1.87
  -9 -13  18    0.38    1.85
  -9 -12  17   20.55    1.80
  -9 -10  14  123.43    1.94
  -9  -9  12   50.69    1.70
  -9  -8  10    0.92    1.55
  -9  -6   4    2.25    1.67
  -8 -10  16    0.19    2.06
  -8  -9  14   42.28    1.81
  -8  -7  10   11.77    1.62
  -8  -6   7  170.65    2.03
  -8  -5   3    0.69    1.60
  -7  -9  16    5.57    1.61
  -7  -8  14   55.85    1.72
  -7  -7  12  222.17    2.16
  -7  -4   2   -0.28    1.70
  -6 -12  21    1.26    2.19
  -6 -11  20    1.24    1.72
  -6  -8  16    5.03    1.97
  -6  -7  14   21.88    1.67
  -6  -5   9   36.65    1.75
  -6  -3   0   86.38    2.20
  -5 -12  22   22.29    2.35
  -5 -11  21    7.02    1.81
  -5 -10  20    6.23    1.71
  -5  -7 -32    0.95    2.29
  -5  -5 -27  101.30    2.94
  -5  -5  11    2.27    1.64
  -5  -4   8   52.95    1.79
  -5  -3   4  772.72    3.68
  -4 -11  22    2.99    1.83
  -4 -10  21   64.66    1.98
  -4  -9  20   31.28    2.13
  -4  -7  17   74.13    2.17
  -4  -6  15    0.62    1.61
  -4  -5  13   59.82    2.15
  -4  -4  10   50.16    1.76
  -3 -11  23    8.09    2.29
  -3 -10  22   21.51    2.22
  -3  -9  21   19.69    2.13
  -3  -7  18   42.04    1.73
  -3  -4  12   20.99    2.04
  -3  -3   9   17.25    2.24
  -3  -2 -19   75.41    2.37
  -2  -7  19   45.25    1.74
  -2  -6 -32    4.93    2.45
  -2  -5 -30    3.21    2.26
  -2  -2   7   16.33    1.94
  -2  -1 -15   26.13    2.51
  -1 -11  24    8.77    1.90
  -1  -7  20  164.19    2.50
  -1  -4 -28    0.52    2.19
  -1  -3  12   82.37    1.95
  -1  -2 -22   61.56    2.27
  -1  -2   9  525.11    3.75
   0  -9  23    1.24    2.19
   0  -8  22   89.98    2.42
   0  -3 -26    1.20    2.23
   0  -2 -23   61.63    1.91
   0  -1 -19   95.75    2.02
   0   0 -12  148.31    2.64
   1  -5 -31    4.97    1.83
   1  -4 -29   44.50    2.05
   1  -1 -20   23.28    1.72
   1  -1   8   96.02    2.98
   2  -4 -29   57.61    2.18
   2  -4  17   87.10    2.36
   2  -3  15   23.68    2.03
   2  -2 -24   43.90    1.87
   3  -8  23   10.04    2.55
   3  -7  22   54.94    2.65
   3  -4 -29   -0.25    1.88
   3  -2 -24    4.70    1.69
   3   0 -16    9.72    2.16
   3   1  -7   49.13    2.11
   3   1  -6  492.11    3.36
   3   1  -5  106.22    2.43
   3   1  -4  173.22    2.73
   4  -9  24    1.79    2.65
   4  -8  23    5.05    2.27
   4  -7  22   17.89    2.59
   4  -3  16  345.56    4.06
   4  -2 -24    9.23    1.77
   4  -1 -21    1.15    1.65
   4   1  -9  101.91    2.09
   4   1  -1  206.65    2.85
   5  -8  23    0.97    2.63
   5  -7  22    0.97    2.52
   5  -6  21   54.69    3.00
   5  -4 -28    2.67    2.33
   5  -4  18    3.54    2.63
   5  -3 -26    0.99    2.31
   5   1 -10   10.34    1.76
   5   1   0    2.23    2.43
   6  -7  22    1.40    3.21
   6  -4  18   13.26    3.24
   6  -2 -23   21.98    2.18
   6  -1 -20    4.38    1.74
   6   0 -16   46.84    1.83
   6   0   7  308.94    4.54
   6   1 -10  245.47    2.40
   6   1  -9   20.88    2.20
   7  -3 -25   15.87    1.94
   7   1  -9    9.65    1.72
   7   1  -8   23.18    1.79
   7   1   0    2.78    2.30
   8  -3 -24    4.06    1.89
   8   0 -14  100.39    2.31
   8   1  -7  123.53    2.03
   8   1  -6   -0.08    1.75
   8   1  -5   42.78    1.88
   8   1  -4   -1.65    2.17
   8   1  -3  132.27    2.52
   8   1  -2   19.13    1.80
   8   1  -1   43.13    1.94
   9  -3 -23    8.12    2.01
   9  -2 -20   44.54    2.43
   9  -1 -17   28.34    1.84
   9   0 -13   36.42    1.82
  10  -3 -21   29.82    2.53
  10  -2 -19   11.33    1.98
  10   0 -11   29.25    1.85
  10   0 -10  134.44    2.48
  11  -2 -17   -1.24    1.93
  11  -2  10   33.08    2.66
  11  -1 -13    3.39    1.85
  11   0  -7    6.81    1.75
  11   0  -6    5.57    1.76
  11   0  -5   11.41    2.20
  11   0  -1   27.52    2.36
  11   0   0  326.87    3.03
  12  -2 -14   58.67    2.58
  12  -2   8   17.64    2.69
  12  -1 -10   -0.19    1.82
  12  -1   4   73.04    2.48
  13  -4  11   21.07    2.97
  13  -2 -11   13.07    2.03
  13  -2   5   17.39    2.44
  14  -3   5    6.94    2.51
  14  -2  -5    2.57    2.04
  14  -2  -4    6.18    2.05
  14  -2  -3    5.91    2.03
  14  -2  -2   28.85    2.15
  14  -2  -1   25.24    2.13
 -17 -13  -9    1.50    1.90
 -17 -13  -8   12.29    2.47
 -17 -13  -7    7.02    2.45
 -16 -13   0   -0.30    1.86
 -16 -12  -5   90.88    2.24
 -16 -12  -4   22.31    2.40
 -15 -12   2  105.62    2.54
 -15 -11  -2   32.28    2.19
 -14 -13   8   27.19    1.91
 -14 -12   6    1.38    1.80
 -14 -11   3   96.47    2.04
 -14 -10 -21    4.98    3.25
 -14 -10  -1   29.46    1.76
 -14  -9 -12    8.18    2.11
 -14  -9 -11   64.04    2.30
 -14  -9 -10    3.50    2.04
 -14  -9  -9    4.31    2.13
 -13 -12   9   75.16    1.97
 -13 -11   7   39.66    2.18
 -13 -10   4   58.75    1.83
 -13  -9   0  168.78    2.17
 -13  -8 -13   37.95    2.63
 -13  -8 -12  129.60    2.57
 -13  -8 -11    9.02    2.01
 -13  -8 -10   13.40    2.07
 -13  -8  -9    3.52    2.08
 -13  -8  -8   73.21    2.25
 -12 -13  13   33.27    1.93
 -12  -8 -21    4.29    4.32
 -12  -8   0   28.75    1.76
 -12  -7 -12    9.22    2.36
 -12  -7 -11    2.20    2.03
 -12  -7 -10   -0.68    2.07
 -12  -7  -9   74.70    2.32
 -12  -7  -8   25.15    2.17
 -11 -13  15    2.16    1.84
 -11 -12  14   13.38    2.19
 -11 -11  12   14.96    1.76
 -11 -10  10   20.65    1.70
 -11  -9   8    4.59    1.63
 -11  -8   5   22.31    2.07
 -10 -11  14   45.05    1.89
 -10  -8   8  282.27    2.25
 -10  -7   5   60.06    2.12
 -10  -6   0    8.02    1.65
  -9 -11  16    6.29    1.71
  -9  -7   8    0.49    1.63
  -9  -5  -1  423.94    2.78
  -8 -12  19    3.48    1.86
  -8  -8  13   62.07    2.10
  -8  -5   4   77.04    2.17
  -8  -4  -3   77.97    1.96
  -7 -12  20   26.08    1.93
  -7 -11  19   60.71    1.95
  -7 -10  18   19.64    2.17
  -7  -6  10    3.49    1.53
  -7  -5   7   34.75    1.70
  -6 -10  19   12.22    1.76
  -6  -9  18   58.30    2.22
  -6  -6  12    3.38    1.59
  -6  -4   6  307.17    2.48
  -5  -9  19  149.15    2.07
  -5  -7  16    0.98    1.60
  -5  -6  14  111.37    1.91
  -5  -3 -19   53.51    2.92
  -5  -2  -3  217.96    3.30
  -4  -8  19   18.30    2.07
  -4  -5 -28   84.20    2.51
  -4  -4 -25   11.48    2.11
  -4  -3   7  502.16    3.10
  -4  -2 -16   65.41    2.67
  -4  -2   2    1.76    2.00
  -3  -6 -31   17.80    2.34
  -3  -5 -29   17.59    2.26
  -3  -3 -23   76.50    2.37
  -3  -2   5 1380.40    5.10
  -2 -11  24    1.33    2.30
  -2 -10  23    2.73    2.19
  -2  -9  22   64.70    2.37
  -2  -5  16  164.84    2.42
  -2  -4 -27   21.74    2.21
  -2  -3 -24    7.60    2.08
  -2  -3  11  187.52    2.70
  -2  -1   2   25.46    2.69
  -1  -5 -30   17.15    2.37
  -1  -5  17    2.73    2.01
  -1  -4  15  266.41    2.70
  -1  -3 -25    3.78    2.09
  -1  -1 -17  385.98    3.35
   0 -10  24    7.60    2.33
   0  -7  21   32.14    2.15
   0  -4 -28   18.47    2.26
   1  -6  20   10.96    2.02
   1  -3 -26    7.95    1.79
   1  -2 -23   72.55    2.23
   1   0 -14  182.15    2.29
   2  -9  24    8.73    2.65
   2  -8  23   42.22    2.29
   2  -5  19    4.27    2.01
   2  -3 -26   66.35    2.36
   2  -1 -20    6.80    1.61
   2   0 -15  416.85    2.84
   3  -9  24   15.35    2.32
   3  -6  21    0.47    2.34
   3  -3 -26   16.12    2.21
   3  -1 -20   57.07    2.14
   4  -6  21   31.79    2.54
   4  -4 -28    5.79    2.31
   4  -4  18    7.06    2.23
   4  -3 -26    2.76    1.81
   4  -1 -20  151.77    2.46
   4   0 -16   46.30    1.79
   4   1  -8   76.15    2.04
   4   1  -7  695.43    3.58
   4   1  -2    2.73    2.01
   5  -2 -23    1.00    1.74
   5  -2  14   26.31    3.53
   5  -1 -20  144.93    2.10
   5   0 -16   34.41    1.82
   5   1  -9  496.57    2.92
   5   1  -8  270.12    2.45
   5   1  -1  488.21    3.79
   6  -8  23   14.64    3.14
   6  -6  21    2.26    3.02
   6  -3 -25    1.07    1.89
   6   1  -8  114.15    2.04
   6   1  -7   -0.14    2.10
   6   1   0  407.78    3.27
   7  -3 -24   15.38    2.37
   7  -2 -22   20.32    1.88
   7  -1 -19   10.63    1.76
   7   0 -15    7.99    1.73
   7   1  -7   30.27    1.85
   7   1  -6   53.92    1.89
   7   1  -5  113.80    2.40
   7   1  -3    2.60    2.14
   7   1  -2  114.09    2.47
   7   1  -1    1.51    1.85
   8  -2 -21    2.24    1.80
   8  -1 -18  161.97    2.15
   8  -1  10    3.59    2.95
   8   0 -13  169.41    2.50
   8   0   6    5.36    2.14
   9  -3 -22   45.10    2.13
   9  -1 -16   38.40    2.29
   9   0 -12   -1.09    1.72
   9   0   5  198.53    2.82
  10  -2 -18    0.71    1.92
  10  -1 -15    1.20    1.78
  10  -1   8  310.76    3.37
  10   0  -9   62.77    1.97
  10   0   3   35.73    1.92
  11  -2 -16   19.36    1.92
  11  -1 -12   37.20    1.93
  11  -1   6  312.09    3.24
  11   0  -4  144.85    2.18
  11   0  -3   20.59    1.81
  11   0  -2  264.56    2.51
  12  -3 -16   28.42    2.62
  12  -2 -13    4.06    1.96
  12  -1  -9    0.58    1.85
  12  -1  -8   28.66    1.96
  12  -1   3   78.96    2.45
  13  -3   8    4.02    2.37
  13  -2 -10    4.11    2.00
  13  -2  -9   57.89    2.62
  13  -2   4    7.35    2.40
  14  -4   8    0.04    2.50
  14  -3   4   11.44    2.49
 -17 -13  -6   53.53    2.25
 -17 -13  -5   28.57    2.54
 -16 -13   1   35.48    2.02
 -16 -12  -3   88.79    2.17
 -15 -13   5   41.88    2.02
 -15 -12   3    2.09    2.24
 -15 -11 -21    1.26    3.31
 -15 -11  -1   12.93    2.26
 -15 -10 -13   10.48    2.58
 -15 -10 -12   36.70    2.31
 -15 -10 -11    1.90    2.16
 -15 -10 -10    3.41    2.16
 -15 -10  -9    1.21    2.16
 -14 -11   4    3.50    1.81
 -14 -10   0    5.84    1.78
 -14  -9 -14   43.91    2.73
 -14  -9 -13  188.79    2.95
 -14  -9  -8    2.99    1.67
 -14  -9  -7   79.88    2.39
 -13 -10   5   -0.16    2.07
 -13  -9   1   -0.32    1.65
 -13  -8 -14  168.60    3.12
 -13  -8  -7    0.08    1.65
 -13  -8  -6  287.75    2.87
 -12 -12  12    1.39    1.82
 -12 -11  10  110.71    2.03
 -12 -10   8  157.19    2.08
 -12  -9   5    7.34    1.67
 -12  -8   1   75.28    1.87
 -12  -7 -14    0.75    2.69
 -12  -7 -13  137.49    2.96
 -12  -7  -7  185.95    2.24
 -12  -7  -6    4.45    2.01
 -11 -10  11   53.90    2.13
 -11  -7   1   87.83    1.84
 -11  -6 -12   51.78    2.85
 -11  -6 -11  138.28    2.99
 -11  -6 -10   36.31    2.24
 -11  -6  -9   58.17    2.25
 -11  -6  -8  164.90    2.60
 -11  -6  -7   15.71    2.04
 -10 -12  16    5.51    1.81
 -10 -11  15   22.38    2.18
 -10 -10  13   38.10    1.78
 -10  -9  11    0.99    1.65
 -10  -6   1   92.57    1.91
  -9 -12  18   29.50    1.92
  -9 -10  15    4.16    1.70
  -9  -9  13    5.85    1.66
  -9  -8  11    2.07    1.60
  -9  -6   5   25.11    1.66
  -9  -5   0  125.19    2.03
  -8 -11  18   51.52    1.91
  -8  -9  15  110.72    1.94
  -8  -7  11   17.39    1.64
  -8  -6   8   84.29    1.79
  -8  -4  -2  612.87    3.34
  -7  -8  15    9.65    1.61
  -7  -7  13   26.94    1.72
  -7  -5 -23   91.70    3.27
  -7  -4   3    2.55    1.63
  -7  -3  -9  455.33    4.94
  -7  -3  -8   40.30    2.68
  -7  -3  -7   29.11    2.61
  -7  -3  -6   39.35    2.57
  -6  -7  15   31.61    2.06
  -6  -6 -28    1.17    2.50
  -6  -5 -25  120.87    3.05
  -6  -5  10    9.97    1.63
  -6  -3   1   35.12    2.02
  -5  -8  18   11.22    1.65
  -5  -5  12  202.90    2.16
  -5  -4   9   -0.14    1.61
  -5  -3   5  218.88    2.82
  -4  -6 -30   54.53    2.55
  -4  -4  11  234.88    2.27
  -4  -3 -21   82.93    2.81
  -3  -6  17  155.18    2.05
  -3  -5  15   38.19    1.71
  -3  -4 -26  101.81    2.48
  -3  -1 -10   12.60    2.92
  -2  -8  21  121.16    2.09
  -2  -6  18   -0.07    1.65
  -2  -4  14   99.06    1.89
  -2  -2 -20  199.65    2.80
  -1 -10  24    5.46    2.28
  -1  -9  23    6.06    2.19
  -1  -6  19   48.83    2.17
  -1  -2 -21   50.50    2.14
   0  -5 -30    3.13    1.83
   0  -5  18   18.77    1.63
   0  -4  16   36.78    1.83
   0  -3 -25   78.17    2.36
   0  -2 -22   29.82    2.19
   0  -1 -18    3.95    1.52
   0   0 -11  116.96    2.35
   1  -5 -30   14.86    2.41
   1  -4 -28   20.90    1.92
   1  -1 -19   -0.36    1.68
   1   0 -13  233.12    2.57
   2  -7  22   13.18    2.14
   2  -5 -30    3.21    1.91
   2  -4 -28   31.70    1.95
   2  -2 -23    8.16    1.76
   2   0 -14  181.98    2.64
   3  -4 -28   44.35    2.01
   3  -2 -23    6.08    1.64
   3   0 -15  163.71    2.22
   4  -2 -23   45.37    1.88
   4   0 -15   14.81    1.75
   4   1  -6  103.70    2.26
   4   1  -5  137.55    2.40
   4   1  -4  253.68    2.84
   4   1  -3    4.60    2.03
   5  -4 -27    5.67    1.97
   5  -3 -25   22.85    1.92
   5   0 -15    3.94    1.69
   5   1  -7  154.33    2.24
   5   1  -6   94.26    2.15
   5   1  -5   13.99    2.41
   5   1  -3   14.92    2.46
   5   1  -2    4.41    1.98
   6  -2 -22   71.21    1.99
   6  -1 -19   27.84    1.79
   6   0 -15    4.38    1.67
   6   1  -6    1.10    1.72
   6   1  -5   42.89    1.94
   6   1  -4    9.17    1.86
   6   1  -3   70.00    2.12
   6   1  -2  249.25    2.70
   6   1  -1  243.30    2.70
   7  -2 -21    3.08    1.83
   7  -1 -18   67.78    1.95
   7   0 -14  156.69    2.14
   7   1  -4   39.91    1.87
   8  -2 -20   37.71    1.93
   8  -1 -17    6.61    1.76
   8   0 -12    1.01    1.71
   9  -3 -21    4.44    1.92
   9  -2 -19    3.98    1.84
   9  -2  12   31.06    3.13
   9  -1 -15   20.83    2.24
   9  -1   9  252.22    3.61
   9   0 -11   15.03    1.77
   9   0 -10    7.20    1.74
   9   0   4  162.37    2.70
  10  -3 -20    8.85    1.99
  10  -2 -17    4.15    1.85
  10  -2  11   42.88    2.69
  10  -1 -14   19.79    1.88
  10  -1 -13    0.41    2.20
  10   0  -8   57.28    1.97
  10   0  -7   78.78    1.95
  10   0   1   36.95    2.34
  10   0   2  535.53    3.26
  11  -6  17    7.30    4.12
  11  -4  14   13.51    3.26
  11  -3  12   42.40    3.05
  11  -2 -15   13.86    1.92
  11  -1 -11    3.72    1.86
  12  -5  14    1.49    3.34
  12  -3 -15   13.37    2.52
  12  -3  10   29.54    2.83
  12  -2 -12   25.41    1.95
  12  -2   7   24.23    2.34
  12  -1  -7   46.83    1.98
  12  -1  -6  143.01    2.32
  12  -1  -5  161.36    2.68
  12  -1   0   17.50    2.31
  12  -1   1    5.99    2.25
  12  -1   2   70.57    2.13
  13  -5  12    1.10    2.89
  13  -4  10   39.27    3.00
  13  -3 -12    8.05    2.06
  13  -2  -8   15.09    2.02
  13  -2  -7  131.56    2.42
  13  -2   3   51.82    2.55
  14  -4   7   63.14    2.92
  14  -3  -8    1.49    2.07
  14  -3  -7    0.50    2.10
  14  -3  -6    7.18    2.56
  14  -3   2    4.82    2.53
  14  -3   3    0.59    2.08
 -17 -13  -4   41.77    2.58
 -16 -13   2    0.59    1.90
 -16 -12  -2   45.00    1.99
 -15 -13   6    1.62    1.87
 -15 -11   0    0.68    1.77
 -15 -10 -14  111.57    3.06
 -15 -10  -8   10.72    1.80
 -15 -10  -7    2.42    2.17
 -15 -10  -6   75.24    2.41
 -14 -13   9   -1.26    1.88
 -14 -12   7    0.00    1.71
 -14 -11   5   81.57    2.33
 -14 -10   1   24.78    1.74
 -14  -9 -15  115.47    3.04
 -14  -9  -6    2.13    1.70
 -14  -9  -5  145.83    2.55
 -13 -13  12    2.22    1.85
 -13 -12  10    1.46    1.76
 -13 -11   8   10.55    1.75
 -13  -9   2  185.94    2.46
 -13  -8 -15   55.36    2.74
 -13  -8  -5    1.21    1.75
 -13  -8  -4  264.91    2.72
 -12 -13  14   12.78    1.90
 -12 -12  13    4.13    2.21
 -12 -11  11    0.35    1.72
 -12  -9   6   17.11    1.70
 -12  -8   2   62.81    1.85
 -12  -7  -5  350.35    2.64
 -12  -7  -4   46.71    2.19
 -11 -13  16   28.61    2.02
 -11 -12  15    6.42    1.79
 -11 -11  13    8.11    1.77
 -11  -9 -27    9.74    4.45
 -11  -9   9  157.89    2.06
 -11  -8   6   81.28    1.83
 -11  -7   2   59.06    1.75
 -11  -6 -13    6.88    2.56
 -11  -6  -6  201.36    2.65
 -11  -6  -5   12.89    2.04
 -10  -9 -29   10.47    3.68
 -10  -8   9   27.64    1.67
 -10  -7   6   23.52    1.71
 -10  -6   2  243.45    2.54
  -9 -11  17    0.33    1.73
  -9  -9  14  214.89    2.48
  -9  -7   9  233.33    2.20
  -9  -5   1  343.58    2.78
  -8 -12  20   63.30    2.48
  -8 -10  17    6.91    1.74
  -8  -8 -30    2.66    2.74
  -8  -5   5   13.07    1.67
  -8  -4  -1   61.55    2.31
  -7 -12  21    2.20    1.88
  -7 -11  20    8.22    1.73
  -7  -7 -29    0.63    2.54
  -7  -6  11    2.26    1.58
  -7  -5   8  133.74    2.02
  -7  -3 -10   79.30    3.51
  -7  -3  -5   50.71    2.28
  -6 -12  22   -0.26    1.92
  -6 -11  21    4.56    1.78
  -6 -10  20   20.52    1.75
  -6  -8  17   15.72    1.64
  -6  -6  13  278.87    2.25
  -6  -4 -21  202.87    3.73
  -6  -4   7   35.53    1.73
  -5 -11  22   24.85    1.90
  -5 -10  21    6.55    1.77
  -5  -9  20   13.29    2.11
  -5  -7 -31   15.77    2.73
  -5  -6 -29   37.85    2.34
  -5  -4 -23   21.36    2.46
  -5  -2  -2  103.34    2.72
  -4 -11  23   12.66    1.91
  -4 -10  22    0.59    1.81
  -4  -9  21   35.76    2.22
  -4  -7  18   98.86    1.91
  -4  -6  16   26.58    1.62
  -4  -5  14   38.05    1.78
  -4  -3   8   16.28    2.18
  -4  -2   3   96.55    2.71
  -3 -11  24    3.62    2.31
  -3 -10  23   29.13    2.36
  -3  -9  22  129.08    2.53
  -3  -7  19   24.40    1.65
  -3  -4  13   15.46    2.07
  -3  -3  10  203.56    2.69
  -3  -2 -18   77.67    2.33
  -3  -1  -2   18.28    3.06
  -2  -7  20   14.38    1.69
  -2  -6 -31   57.50    2.59
  -2  -5 -29   22.65    1.86
  -2  -2   8  155.97    2.49
  -2  -1 -14   99.06    2.59
  -1  -8  22   44.51    1.93
  -1  -4 -27    0.86    2.15
  -1  -3  13   62.57    2.21
  -1  -1 -16   22.33    2.19
  -1  -1   5   43.94    2.46
   0  -6  20  203.74    2.57
   0  -3  14  208.54    2.71
   0  -2  11   17.27    2.19
   0  -1   7  157.13    2.87
   0   0 -10  385.36    3.58
   1 -10  25    0.64    2.32
   1  -9  24   67.83    2.16
   1  -8  23    5.04    1.78
   1  -7  22   13.04    2.13
   1  -5  19  209.29    2.70
   1  -4  17  189.59    2.41
   1  -3 -25  120.11    2.46
   1  -2 -22   65.40    2.29
   1  -2  12  115.65    2.52
   2  -6  21    7.09    2.05
   2  -3 -25   11.63    2.18
   2  -2  13  384.17    3.83
   2  -1 -19   10.08    1.77
   3  -4  18   63.13    2.35
   3  -3 -25    5.54    2.21
   3  -3  16   44.51    2.46
   3  -1 -19   49.84    1.75
   3   0 -14   14.59    2.10
   4  -5  20   26.67    2.40
   4  -4 -27    0.73    1.92
   4  -3 -25    4.47    1.74
   4  -2 -22   64.53    2.31
   4  -2  14  156.72    3.73
   4  -1 -19    2.38    1.67
   5  -5  20   11.99    2.72
   5  -2 -22  179.73    2.25
   5  -1 -19   27.48    1.79
   5   0 -14    0.20    2.13
   5   1  -4    0.40    1.93
   6  -4 -26   48.85    2.09
   6  -3 -24   51.29    2.02
   6  -2 -21   17.03    2.22
   6  -1 -18    9.98    1.73
   6   0 -14   84.21    1.90
   7  -7  22   13.63    3.68
   7  -4 -25    5.95    1.96
   7  -4  18   12.16    4.35
   7  -3 -23    3.45    1.80
   7  -1 -17   21.88    1.82
   7   0 -13   43.69    1.84
   7   0   6  391.66    4.02
   8  -3 -22   19.53    1.99
   8  -2 -19    3.49    2.25
   8  -1 -16  193.83    2.30
   8   0 -11   29.51    1.78
   8   0   5  484.78    4.02
   9  -2 -18   38.07    1.98
   9  -1 -14   11.64    2.21
   9   0  -9   71.35    2.03
  10  -3 -19   15.34    1.97
  10  -2 -16    3.35    1.86
  10  -1 -12   36.66    2.28
  10  -1   7  105.28    3.00
  10   0  -6   -1.71    1.79
  10   0  -5   68.31    1.88
  10   0  -4    1.83    1.72
  10   0  -2   99.52    2.43
  10   0  -1    9.58    2.21
  10   0   0  286.42    2.61
  11  -3 -17   62.77    2.14
  11  -2 -14   50.28    2.06
  11  -2   9    3.58    2.57
  11  -1 -10   18.77    1.91
  11  -1  -9   -1.02    1.84
  11  -1   5   14.24    2.29
  12  -4  12   71.93    3.43
  12  -3 -14    8.66    2.49
  12  -2 -11    4.60    1.95
  12  -1  -4   85.35    2.06
  12  -1  -3   64.55    2.06
  12  -1  -2    9.20    1.78
  12  -1  -1    4.48    1.88
  13  -3 -11   21.04    2.14
  13  -3   7    9.77    2.39
  13  -2  -6    1.89    1.97
  13  -2  -5   76.47    2.24
  13  -2  -4    1.35    2.37
  13  -2  -3    3.12    2.34
  13  -2  -2    3.58    2.34
  13  -2  -1   23.14    2.44
  13  -2   0   10.22    2.41
  13  -2   1   79.53    2.60
  13  -2   2    8.08    1.99
  14  -4   6    9.69    2.62
  14  -3  -5   15.49    2.10
  14  -3  -4   15.37    2.11
  14  -3  -3   33.60    2.23
  14  -3  -2   14.78    2.60
  14  -3  -1   25.60    2.58
  14  -3   0    0.57    2.59
  14  -3   1    4.18    2.04
 -17 -13  -3   43.05    2.15
 -16 -13   3   49.74    2.11
 -16 -12  -1    3.80    1.90
 -16 -11 -14   39.51    2.86
 -16 -11 -13    5.68    2.35
 -16 -11 -12   15.20    2.30
 -16 -11 -11    4.22    2.26
 -16 -11 -10   -0.18    2.26
 -16 -11  -9    4.50    2.21
 -16 -11  -8    6.39    2.23
 -16 -11  -7    1.20    2.27
 -15 -13   7   17.38    1.99
 -15 -12   4   79.62    2.12
 -15 -11   1   20.75    2.23
 -15 -10 -15    2.71    2.25
 -15 -10  -5    1.46    2.18
 -14 -13  10   40.57    2.03
 -14 -12   8    6.41    1.85
 -14 -10 -22    5.92    3.89
 -14 -10   2    0.25    1.76
 -14  -9 -16   31.50    2.65
 -14  -9  -4   12.89    1.73
 -14  -9  -3   88.18    2.39
 -13 -12  11   43.41    2.34
 -13 -11   9   88.61    2.39
 -13 -10   6   22.02    1.77
 -13  -9   3    2.98    2.08
 -13  -8 -16   89.13    3.18
 -13  -8  -3    3.55    2.00
 -12 -13  15   33.56    2.45
 -12  -8   3  191.92    2.16
 -12  -7 -15  262.77    3.89
 -12  -7  -3  424.17    3.07
 -11 -11  14    1.96    2.12
 -11 -10  12    2.13    1.69
 -11  -8   7    3.48    1.98
 -11  -7   3   90.98    1.87
 -11  -6  -4  145.32    2.48
 -10 -12  17    2.19    1.83
 -10 -11  16    2.63    2.17
 -10 -10  14   20.65    1.74
 -10  -9  12    0.40    1.66
 -10  -8  10   81.59    2.12
 -10  -7   7  149.70    2.33
 -10  -5 -10   93.43    2.66
 -10  -5  -9   38.05    2.36
 -10  -5  -8  102.23    2.37
 -10  -5  -7  162.51    2.51
  -9 -12  19   28.27    2.33
  -9 -10  16   83.22    1.91
  -9  -8  12    2.67    1.56
  -9  -6   6   18.24    1.64
  -8 -11  19   19.92    1.90
  -8  -9  16    5.03    1.66
  -8  -8  14    3.02    1.62
  -8  -7  12   58.11    1.75
  -8  -6   9   85.70    1.81
  -8  -4   0 1371.57    4.69
  -7 -10  19   39.54    1.86
  -7  -8  16   16.45    1.69
  -7  -7  14  171.05    2.06
  -7  -6 -26   31.11    2.91
  -7  -4   4   10.04    1.67
  -7  -3  -4   47.79    2.20
  -6  -9  19   26.49    1.81
  -6  -7 -30    5.84    2.28
  -6  -5  11   43.03    2.05
  -6  -3   2   32.75    1.97
  -5  -8  19   64.44    2.19
  -5  -7  17  122.43    1.93
  -5  -6  15    2.70    1.57
  -5  -5 -26   61.64    2.45
  -4  -8  20   12.07    2.07
  -4  -5 -27   26.25    2.31
  -4  -4 -24  234.93    3.19
  -3  -8  21    3.09    2.07
  -3  -6 -30   46.29    2.49
  -3  -5 -28   28.40    2.23
  -3  -3 -22    4.16    2.07
  -3  -2   6  360.36    3.06
  -2 -10  24    3.72    2.19
  -2  -9  23   42.43    2.30
  -2  -5  17  211.14    2.56
  -2  -4 -26   12.61    2.11
  -2  -3 -23    2.38    2.03
  -2  -3  12    3.22    2.11
  -1  -7  21   11.56    1.73
  -1  -6 -31   15.15    1.99
  -1  -5 -29    5.04    1.82
  -1  -3 -24   53.24    1.88
  -1  -2  10   75.42    2.57
   0 -10  25   36.55    2.46
   0  -9  24   13.90    2.28
   0  -8  23    9.28    2.15
   0  -6 -31    0.32    2.38
   0  -5 -29    0.76    2.28
   0  -4 -27   24.63    1.85
   0  -2 -21  198.64    2.55
   0  -1 -17  111.05    2.00
   1  -5 -29   59.92    2.50
   1  -4 -27  170.57    2.68
   1  -3  15    6.76    2.15
   1  -1 -18    5.00    1.62
   1   0 -12  516.92    3.35
   2  -5 -29   73.29    2.61
   2  -4 -27   75.07    2.47
   2  -4  18   22.09    2.48
   2  -2 -22   60.20    1.85
   2  -1 -18   12.39    2.06
   2   0 -13  517.31    3.11
   3  -5 -29    5.74    1.91
   3  -5  20    7.77    2.07
   3  -4 -27    4.48    1.88
   3  -2 -22   24.58    1.77
   4  -1 -18  107.94    2.40
   4   0 -14   63.74    1.89
   5  -4 -26    9.39    1.85
   5  -3 -24   38.43    1.95
   5  -2 -21    9.69    2.07
   5  -1 -18   80.53    1.99
   6  -5  20  100.71    3.63
   6  -4 -25   -1.01    2.28
   6  -3 -23    7.11    1.85
   6  -1 -17    3.35    2.15
   6   0 -13    2.62    1.63
   7  -6  21    1.46    3.65
   7  -3 -22    7.25    2.29
   7  -2 -20   21.40    1.84
   7   0 -12  102.85    1.94
   8  -4 -23   20.23    2.47
   8  -3 -21    6.47    1.89
   8  -1 -15    7.46    1.76
   8   0 -10    5.00    1.72
   9  -4 -22   43.98    2.14
   9  -3 -20   63.86    2.12
   9  -2 -17   12.64    1.84
   9   0  -8    5.65    1.74
   9   0  -7  172.58    2.15
   9   0   2   58.64    2.38
   9   0   3  470.55    3.31
  10  -3 -18    2.15    1.94
  10  -3  13   40.61    3.28
  10  -2 -15    1.95    1.80
  10  -1 -11    5.69    1.81
  11  -3 -16   12.13    2.02
  11  -2 -13   11.29    1.96
  11  -1  -8    0.87    1.81
  11  -1  -7    4.19    2.17
  11  -1   3   20.69    2.33
  11  -1   4  147.67    2.37
  12  -6  15   15.71    3.67
  12  -3 -13    4.54    2.02
  12  -2 -10   -1.75    1.81
  12  -2  -9   -1.54    1.81
  12  -2   6   49.05    2.48
  13  -4   9   77.59    3.17
  13  -3 -10   27.90    2.10
  13  -3  -9   46.25    2.19
  13  -3   6   17.32    2.44
  14  -4   5   34.78    2.66
 -17 -13  -2    6.19    2.07
 -17 -13  -1    6.48    2.41
 -17 -12 -12   12.95    2.81
 -17 -12 -11    2.41    2.43
 -17 -12 -10   18.08    2.49
 -17 -12  -9    0.21    2.36
 -16 -13   4    3.43    1.87
 -16 -12   0   10.43    1.91
 -16 -11 -15   13.68    2.82
 -16 -11  -6    6.55    1.89
 -16 -11  -5   38.14    2.41
 -15 -13   8    3.18    2.35
 -15 -12   5    1.06    1.75
 -15 -11   2   39.93    1.91
 -15 -10 -16   56.93    2.84
 -15 -10  -4  118.02    2.19
 -15 -10  -3    9.18    2.20
 -14 -12   9   35.61    2.32
 -14 -11   6    0.52    1.75
 -14 -10   3   27.59    1.77
 -14  -9 -17   14.53    2.86
 -14  -9  -2   48.97    2.22
 -13 -13  13    0.18    1.88
 -13 -10   7    6.63    1.67
 -13  -9 -22    9.94    4.79
 -13  -8  -2   33.66    1.78
 -12 -12  14    9.27    1.81
 -12 -11  12   39.23    1.85
 -12 -10  10  230.40    2.32
 -12  -9   7    1.86    1.66
 -12  -8   4   40.20    2.08
 -12  -7  -2    0.99    1.66
 -11 -12  16   43.16    2.00
 -11  -9  10   10.55    1.67
 -11  -7   4   54.40    2.18
 -11  -6 -14  296.08    3.99
 -11  -6  -3    8.44    1.73
 -10  -6   3   36.14    1.73
 -10  -5 -11    1.77    2.32
 -10  -5  -6    2.40    2.03
 -10  -5  -5   65.55    2.18
  -9 -11  18   20.06    1.83
  -9  -8 -28    5.55    2.96
  -9  -7  10   11.37    1.62
  -9  -6   7   62.06    1.77
  -9  -5   2   79.07    1.95
  -8 -10  18    5.28    1.73
  -8  -7 -27    0.96    2.78
  -8  -6 -24    1.20    2.91
  -8  -5   6    7.20    1.62
  -7 -11  21   17.02    2.33
  -7  -9  18    2.67    1.71
  -7  -6  12   32.94    1.68
  -7  -5   9   12.85    1.62
  -7  -4 -18   13.93    3.65
  -7  -4   5  143.80    2.39
  -7  -3 -11  543.47    6.73
  -7  -3  -3  472.51    3.49
  -6 -11  22    8.39    1.83
  -6 -10  21    4.74    2.15
  -6  -8  18   66.41    1.87
  -6  -7  16    7.28    1.62
  -6  -6  14    7.54    1.61
  -6  -4   8  196.72    2.49
  -6  -3   3   47.11    2.38
  -5 -11  23    2.40    1.84
  -5 -10  22   19.24    2.24
  -5  -5  13   11.02    1.69
  -5  -4  10    0.98    1.64
  -5  -3   6 1003.55    3.87
  -5  -2  -1  112.77    2.45
  -4 -11  24    9.64    2.33
  -4 -10  23   83.93    2.53
  -4  -6  17    5.15    2.01
  -4  -4  12   13.36    1.67
  -4  -2 -15  451.84    4.53
  -3  -6  18   93.68    1.89
  -3  -5  16    1.14    1.63
  -3  -4 -25   24.63    2.23
  -3  -1  -9  133.56    4.56
  -3  -1  -1   62.37    3.27
  -2  -8  22    1.82    1.79
  -2  -6  19    0.18    1.62
  -2  -5 -28    8.31    2.16
  -2  -4  15    3.78    1.90
  -2  -2 -19    1.32    1.70
  -2  -1 -13  104.52    2.87
  -2  -1   3  374.58    3.93
  -1  -9  24    0.82    2.21
  -1  -6  20  141.30    2.38
  -1  -5  18  100.00    1.91
  -1  -4 -26   77.05    2.36
  -1  -4  16  313.71    2.54
  -1  -2 -20  166.93    2.36
  -1  -1 -15  148.94    2.66
   0  -7  22   78.95    2.36
   0  -5  19    6.53    2.02
   0  -4  17  405.96    3.17
   0  -3 -24   29.92    1.84
   0   0  -9    8.42    1.95
   1  -6  21   78.99    2.29
   1  -3 -24   36.91    2.24
   1  -2 -21  112.02    2.47
   1  -1 -17   23.93    2.00
   1   0 -11  379.66    3.43
   2  -8  24    0.41    2.55
   2  -5  20  116.96    2.75
   2  -3 -24   45.72    2.27
   2  -3  16   17.43    2.31
   2   0 -12   66.67    2.33
   3  -9  25    3.03    2.67
   3  -8  24   27.70    2.36
   3  -7  23    5.20    2.50
   3  -3 -24   -0.97    1.72
   3  -1 -18   53.59    1.88
   3   0 -13  134.97    2.08
   4  -8  24    4.01    2.66
   4  -7  23   35.82    2.69
   4  -5 -28   -0.24    1.91
   4  -4 -26    2.09    1.89
   4  -3 -24    6.99    1.81
   4  -2 -21  120.14    2.12
   4  -1  11   42.73    4.28
   4   0 -13    2.20    1.76
   5  -3 -23   30.63    2.27
   5   0 -13   12.93    1.75
   6  -2 -20   43.55    1.93
   6   0 -12  107.63    1.95
   6   0   6  176.71    3.83
   7  -4 -24    9.02    1.93
   7  -2 -19    4.01    1.71
   7  -1 -16  120.03    2.07
   7   0 -11   19.71    1.72
   8  -2 -18   38.35    1.88
   8  -1 -14  164.34    2.21
   8   0  -9    1.69    1.69
   8   0   4   89.36    2.60
   9  -4 -21   10.40    2.04
   9  -3 -19    2.78    1.87
   9  -2 -16   10.59    1.78
   9  -1 -12    0.02    2.11
   9  -1   8   20.78    2.51
   9   0  -6  140.64    2.15
   9   0  -5  542.18    3.03
   9   0  -4   83.93    2.36
   9   0   1  283.42    2.80
  10  -6  18   56.63    5.81
  10  -4  15   96.29    4.33
  10  -3 -17    4.66    1.92
  10  -1 -10    9.85    1.78
  10  -1   6  204.87    2.86
  11  -3 -15  131.62    2.38
  11  -2 -12   65.80    2.09
  11  -2   8   88.15    2.84
  11  -1  -6  122.91    2.20
  11  -1  -5    0.36    1.74
  11  -1   2    9.47    2.24
  12  -3 -12    1.29    2.03
  12  -3   9   10.71    2.34
  12  -2  -8   70.61    2.19
  12  -2  -7   27.90    2.37
  12  -2   5   35.47    2.05
  13  -5  11    0.92    2.93
  13  -3  -8   18.46    2.03
  13  -3  -7   24.64    2.55
  13  -3   5    2.82    2.45
  14  -4  -5   13.20    2.63
  14  -4   3    7.58    2.56
  14  -4   4    4.15    2.17
 -17 -12 -14    3.23    2.45
 -17 -12 -13    8.55    2.37
 -17 -12  -8    4.43    1.97
 -17 -12  -7    0.27    2.37
 -16 -13   5   48.68    2.54
 -16 -12   1   17.09    1.97
 -16 -11 -16    9.35    2.71
 -16 -11  -4   11.87    1.92
 -15 -12   6   30.55    1.98
 -15 -10 -17    0.70    2.64
 -15 -10  -2   74.29    2.37
 -14 -13  11    1.15    1.88
 -14 -11   7   14.90    1.79
 -14 -10   4    6.79    2.10
 -14  -9  -1   17.42    2.14
 -13 -12  12    2.55    1.78
 -13 -11  10   57.03    1.92
 -13  -9   4  125.32    2.01
 -13  -8 -17    7.67    2.81
 -13  -8  -1    2.71    1.68
 -12  -9   8    4.84    1.69
 -12  -7 -16    6.46    2.73
 -12  -7  -1   44.58    1.82
 -11 -11  15   25.65    1.87
 -11 -10  13   -0.39    1.68
 -11  -9  11   89.60    2.24
 -11  -8   8   89.02    1.87
 -11  -6  -2   77.68    1.90
 -10 -12  18    2.05    1.87
 -10 -11  17   13.02    2.29
 -10 -10  15   65.36    1.96
 -10  -9  13   47.27    1.83
 -10  -8 -26    0.50    3.60
 -10  -8  11    5.10    1.63
 -10  -7   8   90.34    1.85
 -10  -6   4   99.38    1.89
 -10  -5 -12    5.81    2.58
 -10  -5  -4    4.49    2.05
  -9 -10  17    8.44    1.77
  -9  -8  13   23.43    1.65
  -9  -5   3  281.92    2.39
  -8 -12  21    7.69    1.88
  -8 -11  20   32.73    1.92
  -8  -9  17   81.28    1.88
  -8  -8  15  105.48    1.90
  -8  -7  13   11.97    1.61
  -8  -6  10  115.50    1.88
  -8  -5 -20   67.82    4.30
  -8  -4   1   74.21    1.98
  -7 -10  20   10.83    1.77
  -7  -8  17   11.42    2.04
  -7  -7  15   11.40    2.05
  -7  -3  -2   72.10    2.37
  -6  -9  20   51.48    2.19
  -6  -6 -27   15.21    2.55
  -6  -5 -24    4.35    2.39
  -5  -9  21   10.61    1.82
  -5  -7  18   41.25    2.11
  -5  -6 -28    6.74    2.20
  -5  -6  16    5.39    1.97
  -5  -3 -18    3.68    2.25
  -5  -2   0    2.01    2.43
  -4  -9  22    2.01    1.74
  -4  -7 -31   25.68    2.42
  -4  -7  19   37.72    1.80
  -4  -6 -29    7.26    2.20
  -4  -5  15    3.02    1.59
  -4  -3 -20   16.49    2.09
  -4  -3   9   74.96    1.93
  -4  -2   4   40.54    2.05
  -3 -10  24    2.06    2.30
  -3  -9  23    1.82    2.19
  -3  -7  20    4.45    1.69
  -3  -4  14   72.57    1.90
  -3  -3  11  158.81    2.50
  -3  -2 -17  320.19    3.35
  -2  -7  21   79.34    2.28
  -2  -6 -30    3.67    1.87
  -2  -2   9   95.62    2.64
  -1 -10  25   34.44    2.06
  -1  -8  23   85.93    2.39
  -1  -6 -30    2.41    2.27
  -1  -5 -28   -0.25    2.22
  -1  -3 -23   12.00    2.09
   0  -6 -30   18.03    2.34
   0  -4 -26  104.16    2.41
   0  -1 -16    5.88    1.70
   0   0  -8  213.19    3.29
   1  -9  25    6.44    2.32
   1  -8  24    8.61    2.26
   1  -6 -30   18.42    2.39
   1  -4 -26    1.68    2.17
   1  -1   9   22.07    2.45
   2  -9  25   24.10    2.47
   2  -7  23   -0.10    2.11
   2  -5 -28   32.92    2.38
   2  -4 -26   45.45    2.37
   2  -2 -21   41.79    1.79
   2  -1 -17   59.18    2.12
   2  -1  10    8.60    2.61
   3  -5 -28   27.41    1.96
   3  -4 -26   19.07    1.91
   3  -2 -21   90.01    2.00
   3  -2  14  202.18    3.34
   3  -1 -17   60.53    2.24
   3   0 -12   39.28    1.81
   4  -6  22    1.12    2.47
   4  -3 -23   50.34    2.33
   4  -1 -17   19.53    1.73
   4   0 -12    2.58    1.69
   4   0   6    7.21    3.63
   5  -8  24   10.36    2.89
   5  -7  23    9.73    2.68
   5  -5 -27   49.08    2.11
   5  -4 -25   20.47    2.00
   5  -2 -20  135.69    2.14
   5   0 -12   11.51    1.73
   6  -5 -26   40.91    2.07
   6  -4 -24   50.59    2.06
   6  -3 -22   71.19    2.04
   6  -2 -19    7.66    2.18
   6  -1 -16   23.26    1.78
   6   0 -11   58.11    1.89
   7  -4 -23   -2.27    1.96
   7  -3 -21    6.36    1.84
   7  -2 -18    4.30    2.15
   7  -1 -15   76.96    1.89
   7  -1  10    9.03    3.11
   7   0 -10   70.27    1.89
   7   0   5   34.33    2.28
   8  -4 -22   14.33    1.96
   8  -3 -20   26.46    1.94
   8  -3  15   19.19    5.11
   8  -2 -17   17.00    1.83
   8  -1 -13    5.56    2.09
   8  -1   9  194.96    3.56
   8   0  -8    3.11    1.75
   8   0  -7   25.65    2.20
   8   0   3  314.06    3.18
   9  -3 -18   29.28    1.93
   9  -3  14   73.04    4.03
   9  -2 -15   15.62    2.23
   9  -1 -11   16.10    2.17
   9   0  -3  191.53    2.30
   9   0  -2   17.21    1.81
   9   0  -1    9.82    1.78
   9   0   0   20.16    1.79
  10  -4 -19    0.76    2.01
  10  -3 -16   16.14    2.34
  10  -2 -13   48.23    1.96
  10  -2  10   42.05    2.64
  10  -1  -9   24.44    1.86
  10  -1  -8   11.40    2.20
  10  -1   5   41.04    2.62
  11  -4 -17   31.62    2.15
  11  -3 -14   14.31    1.97
  11  -3  11   12.79    2.67
  11  -2 -11    3.94    1.91
  11  -2 -10   35.34    2.32
  11  -1  -4  388.15    2.88
  11  -1  -3   -0.93    1.86
  11  -1  -2  203.68    2.39
  11  -1  -1    2.39    1.82
  11  -1   0   37.46    1.92
  11  -1   1   30.84    1.94
  12  -4 -14    5.94    2.09
  12  -4  11    0.44    2.72
  12  -3 -11    2.75    2.02
  12  -3   8    4.97    2.67
  12  -2  -6  166.06    2.38
  12  -2  -5  100.57    2.55
  12  -2   3    7.06    2.33
  12  -2   4  104.59    2.28
  13  -4 -10   15.54    2.07
  13  -4   8  100.09    2.93
  13  -3  -6    9.43    2.04
  13  -3  -5    3.48    2.47
  13  -3  -4    0.77    2.43
  13  -3   3    5.67    2.45
  13  -3   4   51.91    2.13
  14  -5   6   21.84    2.68
  14  -4  -4   12.05    2.20
  14  -4  -3   35.37    2.24
  14  -4  -2    6.98    2.18
  14  -4  -1   26.88    2.23
  14  -4   0    4.38    2.64
  14  -4   1    6.45    2.13
  14  -4   2   -0.77    2.11
 -17 -12  -5    8.71    1.95
 -17 -12  -4   11.11    2.46
 -16 -12   2   -1.22    1.84
 -16 -12   3   39.91    2.42
 -16 -11 -17    0.57    2.68
 -16 -11  -3   55.43    2.05
 -16 -11  -2   10.29    2.22
 -15 -12   7   -0.48    1.80
 -15 -11   4   70.32    2.07
 -15 -10  -1   24.11    1.84
 -14 -12  10   26.84    1.92
 -14 -11   8   16.09    2.18
 -14  -9   0   42.40    1.86
 -13 -12  13    8.62    1.88
 -13 -11  11   45.78    1.95
 -13 -10   8    0.92    1.70
 -13  -9   5    6.91    1.70
 -13  -8   0   13.33    1.72
 -12 -11  13    1.41    1.78
 -12 -10  11    7.34    1.72
 -12  -8   5  165.91    2.05
 -12  -7   0    5.48    1.60
 -11 -12  17    3.31    1.89
 -11  -8   9    7.35    2.00
 -11  -7   5   50.24    1.79
 -11  -6 -15   41.66    3.30
 -11  -6  -1   10.74    1.67
 -11  -6   0    4.56    2.00
 -10  -9  14   33.23    1.80
 -10  -6   5   25.30    2.03
 -10  -5  -3    3.50    1.62
 -10  -5  -2   21.22    1.94
  -9 -12  20   24.09    1.96
  -9 -11  19    2.51    1.83
  -9  -9 -30    8.24    3.09
  -9  -9  16  179.34    2.50
  -9  -8  14   40.95    2.11
  -9  -7 -25    1.12    3.07
  -9  -7  11   84.94    1.78
  -9  -6   8   26.33    1.68
  -9  -5   4   78.42    2.19
  -8 -10  19    5.23    1.77
  -8  -8 -29    1.58    2.92
  -8  -6  11    4.90    2.00
  -8  -5   7  145.71    1.98
  -8  -4   2  702.35    3.25
  -7  -9  19   20.15    1.78
  -7  -7 -28    1.87    2.54
  -7  -6  13  127.35    1.96
  -7  -5  10   37.64    1.66
  -7  -4   6   10.59    1.73
  -7  -3  -1  962.92    4.46
  -6  -8 -31    5.90    2.73
  -6  -7 -29    0.98    2.52
  -6  -7  17   14.66    1.70
  -6  -6  15  211.27    2.47
  -6  -5  12   -0.83    1.66
  -6  -4   9    8.79    2.02
  -6  -3 -15  147.13    4.99
  -6  -3   4  257.76    2.54
  -5  -8  20    2.94    1.62
  -5  -7 -30    4.21    2.30
  -5  -5 -25   86.37    2.83
  -5  -5  14  184.26    2.08
  -5  -4 -22  198.84    3.23
  -5  -4  11    1.05    1.64
  -5  -3   7  436.55    2.80
  -4  -8  21   -0.02    1.64
  -4  -5 -26   83.89    2.77
  -4  -4  13   22.93    2.09
  -3  -8  22   39.06    1.89
  -3  -7 -31    1.51    2.34
  -3  -6 -29   16.45    2.29
  -3  -5 -27    3.18    2.17
  -3  -3 -21    0.51    2.05
  -3  -2   7  569.97    3.45
  -2 -10  25    6.87    2.34
  -2  -9  24    8.06    2.24
  -2  -5  18  128.78    2.35
  -2  -4 -25   18.38    2.16
  -2  -3 -22   20.54    2.16
  -2  -2 -18  414.44    3.36
  -1  -7  22   69.62    1.96
  -1  -3  14  208.52    2.33
  -1  -2 -19  256.46    2.91
  -1  -1   6  107.71    2.58
   0  -9  25   20.14    2.39
   0  -6  21   79.21    1.94
   0  -5 -28   69.87    2.09
   0  -3 -23  186.34    2.59
   0  -3  15  212.59    2.77
   0  -2 -20    6.63    1.70
   0  -2  12    1.60    2.11
   0  -1   8  291.62    3.60
   0   0  -7    0.88    2.54
   1  -7  23    9.08    2.16
   1  -5 -28   14.65    1.87
   1  -5  20   47.20    2.26
   1  -4  18    0.72    1.97
   1  -2 -20   42.79    2.18
   1  -2  13    2.62    2.10
   1  -1 -16   35.27    2.10
   1   0 -10  609.77    3.73
   2  -6  22    0.57    2.37
   2  -3 -23    0.05    2.12
   2   0 -11  451.96    3.12
   3  -6  22   36.16    2.27
   3  -3 -23    1.34    1.72
   3  -2 -20    7.88    2.06
   4  -5 -27   12.30    1.97
   4  -4 -25    7.18    1.80
   4  -4  19   50.65    2.55
   4  -3  17   42.22    2.89
   4  -2 -20   88.79    1.97
   4   0 -11    9.82    2.12
   5  -6  22   38.05    3.10
   5  -5 -26    7.42    2.34
   5  -3 -22   91.32    2.02
   5  -1 -16   73.96    1.97
   5   0 -11  151.37    2.15
   5   0   6    7.99    2.98
   6  -3 -21   18.97    2.24
   6  -1 -15   92.66    1.98
   6   0 -10  152.10    2.21
   7  -3 -20    6.67    2.23
   7  -1 -14  207.39    2.28
   7   0  -9    2.49    1.69
   8  -4 -21   78.03    2.61
   8  -3 -19    9.36    1.87
   8  -2 -16   70.96    1.96
   8  -1 -12   18.46    2.15
   8   0  -6  230.26    2.40
   8   0  -5  131.45    2.56
   8   0   2  110.79    2.60
   9  -4 -20   45.79    2.10
   9  -4  16  152.99    5.77
   9  -3 -17   22.16    2.30
   9  -1 -10   54.97    1.90
  10  -7  19   -0.14    5.50
  10  -4 -18   15.65    1.97
  10  -3 -15   39.45    2.44
  10  -2 -12   10.74    1.81
  10  -1  -7   26.24    1.84
  10  -1   4    2.91    2.10
  11  -5  15   20.43    3.57
  11  -4 -16    8.32    2.07
  11  -4  13   55.37    3.38
  11  -3 -13   85.38    2.18
  11  -2  -9    4.21    1.80
  11  -2   7    9.68    2.19
  12  -5  13   16.85    2.91
  12  -4 -13    0.49    2.01
  12  -3 -10   43.64    2.09
  12  -3  -9   -0.55    2.33
  12  -2  -4   73.63    2.08
  12  -2  -3   58.50    2.06
  12  -2  -1    4.79    2.34
  12  -2   0   64.43    2.43
  12  -2   1    1.99    1.87
  12  -2   2  122.21    2.33
  13  -5  10    4.11    2.53
  13  -4  -9   10.65    2.12
  13  -4  -8    5.44    2.53
  13  -4   7   22.27    2.54
  13  -3  -3   32.30    2.10
  13  -3  -2    3.52    1.98
  13  -3  -1   52.09    2.51
  13  -3   0   10.07    2.48
  13  -3   1   13.45    2.05
  13  -3   2   53.47    2.17
  14  -5   4   17.60    2.69
  14  -5   5   12.60    2.66
 -17 -12  -3   39.30    2.12
 -16 -11  -1   22.26    1.91
 -15 -10 -18    1.03    2.67
 -15 -10   0   43.61    1.97
 -14 -12  11   32.59    2.41
 -14 -10   5   37.50    1.82
 -14  -9 -18    1.86    2.79
 -14  -9   1    0.95    1.68
 -13 -10   9   53.53    1.89
 -13  -9   6   45.20    1.80
 -13  -8   1    2.23    1.67
 -12 -11  14    0.26    1.82
 -12 -10  12   67.05    1.96
 -12  -9   9   21.51    1.73
 -12  -8   6   57.09    1.81
 -12  -7   1   30.66    1.72
 -11 -11  16   15.14    1.85
 -11 -10  14   11.72    1.79
 -11  -9  12    5.18    1.65
 -11  -7   6   19.95    1.73
 -10 -12  19   16.99    1.95
 -10 -10  16   44.18    1.85
 -10  -8  12    3.35    1.63
 -10  -7   9  185.89    2.06
 -10  -5 -13   22.41    2.94
 -10  -5  -1   91.31    1.82
  -9 -10  18    5.67    1.81
  -9  -4  -7   39.08    2.16
  -9  -4  -6  181.32    2.72
  -9  -4  -5   13.17    2.13
  -8 -11  21   11.18    2.24
  -8  -9  18   12.25    1.69
  -8  -8  16    3.09    1.67
  -8  -7  14  133.07    1.97
  -8  -5   8   42.26    1.72
  -8  -4   3   43.77    2.16
  -7 -11  22    7.12    1.88
  -7 -10  21   13.29    2.20
  -7  -8 -30   -0.45    2.68
  -7  -5 -22   81.25    3.28
  -7  -3   0  101.48    2.57
  -6 -11  23   -2.23    1.93
  -6 -10  22    1.10    1.76
  -6  -8  19   24.49    1.73
  -6  -4 -20   42.82    2.90
  -5 -10  23   42.73    1.99
  -5  -2   1   75.21    2.22
  -4 -10  24    1.89    2.25
  -4  -7  20   19.53    2.11
  -4  -6  18  143.64    2.09
  -4  -5  16    4.23    2.00
  -4  -4 -23   13.20    2.13
  -4  -3  10   20.09    2.08
  -4  -2   5  618.70    3.52
  -3  -7  21   44.39    2.20
  -3  -6  19   87.38    1.87
  -3  -5  17  188.31    2.17
  -3  -4 -24   47.12    2.18
  -3  -1   0   32.69    2.57
  -2  -8  23  123.30    2.17
  -2  -7 -31    0.66    1.93
  -2  -6 -29   22.99    2.33
  -2  -6  20    2.64    1.62
  -2  -5 -27    5.74    2.19
  -2  -4  16  254.81    2.61
  -2  -3  13   22.25    1.72
  -2  -1 -12   13.16    2.31
  -2  -1   4   27.40    2.39
  -1  -7 -31   -0.62    2.36
  -1  -5  19   13.04    2.03
  -1  -4 -25    1.22    2.13
  -1  -4  17  189.27    2.57
  -1  -2  11  263.14    2.73
  -1  -1 -14   16.81    1.73
   0  -8  24    1.81    1.80
   0  -1 -15   61.85    2.24
   1  -3 -23  108.99    1.98
   1  -3  16  130.68    2.53
   1   0  -9  145.00    2.86
   2  -6 -29   39.39    2.05
   2  -4 -25    9.74    2.14
   2  -2 -20    2.37    1.59
   2  -1 -16   12.70    1.70
   2   0 -10   41.98    2.45
   3  -5 -27    0.41    1.85
   3  -4 -25   10.96    1.76
   3  -4  19  184.79    3.11
   3  -1 -16    4.47    1.79
   3   0 -11   -1.47    1.84
   4  -3 -22    6.45    1.75
   4  -1 -16   80.61    1.93
   5  -4 -24   45.95    1.96
   5  -4  19   15.73    2.82
   5  -3  17    5.84    2.96
   5  -2 -19   11.85    1.75
   5  -1 -15   18.02    2.07
   5   0 -10   51.96    1.90
   6  -8  24   -0.09    3.42
   6  -7  23    0.21    3.25
   6  -5 -25   12.35    1.88
   6  -4 -23    1.84    1.74
   6  -2 -18    1.63    1.71
   6   0  -9   99.27    2.04
   7  -5 -24    3.69    1.99
   7  -5  20    8.51    4.17
   7  -4 -22    0.48    1.80
   7  -2 -17   48.90    1.85
   7  -1 -13   68.73    1.94
   7   0  -7   10.43    1.79
   7   0   4  338.55    3.38
   8  -3 -18   80.43    2.02
   8   0  -4  581.06    3.21
   8   0  -3  293.15    2.62
   8   0  -2   88.57    2.41
   8   0  -1   47.13    2.26
   8   0   0    1.75    2.18
   8   0   1   24.42    1.88
   9  -4 -19    8.33    1.95
   9  -2 -14   10.51    1.82
   9  -2  11  132.96    3.48
   9  -1  -9   38.75    1.87
   9  -1   7   71.15    2.39
  10  -4 -17    7.23    1.98
  10  -2 -11   77.29    2.08
  10  -2   9  225.07    3.40
  10  -1  -6   15.87    1.75
  10  -1  -5   65.26    1.87
  10  -1   3    3.58    2.12
  11  -4 -15   37.60    2.09
  11  -3 -12    2.51    1.94
  11  -3  10    2.37    2.60
  11  -2  -8    5.48    1.87
  11  -2  -7   30.70    2.37
  11  -2   6   62.28    2.50
  12  -4 -12   25.83    2.12
  12  -3  -8   97.57    2.25
  12  -3   7    3.87    2.36
  13  -4  -7    1.43    2.05
  13  -4   6   45.90    2.64
  14  -5   1    6.45    2.69
  14  -5   2    1.18    2.65
  14  -5   3    1.32    2.66
 -17 -12  -2    3.02    1.98
 -17 -12  -1   28.84    2.50
 -16 -12   4    5.23    1.99
 -16 -12   5   48.42    2.53
 -16 -11 -18    2.32    2.76
 -16 -11   0    5.83    1.87
 -15 -12   8    1.68    1.86
 -15 -11   5    9.43    1.87
 -15 -11   6   37.92    2.25
 -15 -10   1    6.09    1.78
 -15 -10   2    1.81    2.22
 -15  -9  -9   36.51    2.31
 -15  -9  -8   22.15    2.28
 -15  -9  -7    1.62    2.11
 -14 -11   9   18.67    1.87
 -14 -10   6    2.79    1.74
 -14  -9   2   26.61    1.77
 -14  -8  -9   90.11    2.41
 -14  -8  -8    3.78    2.00
 -14  -8  -7    1.21    2.07
 -14  -8  -6    1.37    2.12
 -13 -11  12   23.87    1.87
 -13 -10  10   66.89    2.31
 -13  -9   7    9.13    2.12
 -13  -8 -18   23.95    3.23
 -13  -8   2   92.72    1.88
 -13  -8   3    4.86    1.96
 -12 -12  16   21.08    1.99
 -12  -9  10   99.47    1.93
 -12  -8   7   41.85    1.79
 -12  -7 -17  262.33    4.54
 -12  -7   2   11.57    1.67
 -11 -10  15   65.13    1.94
 -11  -9  13    0.44    2.05
 -11  -8  10   40.34    1.75
 -11  -7   7   23.69    2.07
 -11  -6   1   32.80    1.75
 -11  -6   2  129.74    2.30
 -10 -10  17   24.24    2.20
 -10  -9  15   72.12    1.93
 -10  -7  10  118.39    1.95
 -10  -6   6    4.69    1.63
 -10  -5   0   61.62    1.73
  -9 -11  20   42.96    1.96
  -9  -9  17   36.75    2.19
  -9  -8  15   48.55    2.17
  -9  -6   9  284.26    2.32
  -9  -5   5   30.92    1.73
  -9  -4  -9   30.49    2.40
  -9  -4  -8  242.04    3.11
  -9  -4  -4   28.75    1.80
  -9  -4  -3   13.41    2.08
  -8 -10  20   10.97    1.82
  -8  -6  12   10.48    1.62
  -7  -9  20   26.05    1.84
  -7  -8  18    2.74    1.63
  -7  -7  16   82.34    1.83
  -7  -6 -25   -0.30    2.46
  -7  -6  14  136.74    1.99
  -7  -5  11    2.37    1.59
  -7  -4   7  257.17    2.26
  -7  -3   1  973.18    4.26
  -6  -9  21   25.26    1.86
  -6  -7  18   -0.86    2.03
  -6  -5  13   84.81    1.82
  -6  -4  10   62.85    2.21
  -6  -3   5  165.90    2.26
  -5  -9  22   13.62    1.84
  -5  -8  21   48.77    2.28
  -5  -7  19  197.09    2.19
  -5  -6  17    1.27    1.57
  -5  -5  15    1.22    1.99
  -5  -4  12   51.33    1.80
  -5  -3   8  127.48    2.05
  -5  -2   2   52.29    2.52
  -4  -9  23   59.81    2.02
  -4  -7 -30    8.99    2.30
  -4  -6 -28   45.86    2.38
  -4  -3 -19    3.38    2.28
  -4  -2 -14    1.29    2.76
  -3 -10  25   11.32    2.35
  -3  -9  24   71.95    2.51
  -3  -4  15   13.81    1.58
  -3  -3  12   60.51    1.85
  -3  -2 -16  228.79    3.22
  -3  -2   8   36.98    2.04
  -2  -7  22    9.92    2.04
  -2  -2  10  589.41    3.70
  -1  -9  25   19.36    1.93
  -1  -8  24   36.26    2.25
  -1  -6 -29    0.48    1.84
  -1  -6  21   12.21    1.74
  -1  -5 -27   38.66    2.29
  -1  -3 -22  237.64    2.51
   0  -7  23    6.03    1.79
   0  -6 -29    4.99    1.87
   0  -5 -27    4.63    2.16
   0  -5  20   82.05    2.34
   0  -4 -25  100.16    2.05
   0  -4  18    2.27    2.04
   0  -2 -19  221.80    2.46
   0   0  -6  200.70    3.70
   1  -6 -29   53.22    2.11
   1  -6  22    3.59    2.07
   1  -5 -27  132.60    2.21
   1  -4 -25  167.28    2.25
   1  -1 -15    9.84    2.08
   2  -5 -27   57.23    2.04
   2  -4  19   22.22    2.17
   2  -2  14    0.17    2.07
   3  -8  25    3.41    2.66
   3  -6 -28    1.46    2.28
   3  -5  21    1.19    2.13
   3  -3 -22   40.91    1.85
   3  -3  17  153.96    2.72
   3  -2 -19  317.04    2.71
   3  -1  11   12.96    3.07
   3   0 -10   68.02    2.09
   4  -5 -26    1.77    1.87
   4  -5  21   33.33    2.61
   4  -4 -24   -0.29    1.79
   4  -2 -19  162.21    2.25
   4  -1 -15  121.26    2.43
   4   0 -10    4.84    1.73
   5  -5 -25   61.96    2.08
   5  -4 -23   18.17    2.24
   5  -3 -21   23.48    1.84
   5  -2 -18   46.51    1.92
   5   0  -9  226.12    2.37
   6  -6  22   31.31    3.41
   6  -5 -24    8.56    2.27
   6  -3 -20   23.79    1.85
   6  -2 -17   10.58    2.10
   6  -1 -14    1.81    1.71
   6   0  -8   88.30    1.99
   6   0   5  515.45    4.41
   7  -5 -23    1.04    1.91
   7  -4 -21   38.07    2.30
   7  -3 -19   12.09    1.76
   7  -2 -16    0.71    1.75
   7  -1 -12  120.44    2.40
   7   0  -6   90.99    1.99
   7   0   3   34.96    2.28
   8  -5 -22    4.64    1.99
   8  -4 -20   15.83    1.91
   8  -2 -15   -0.32    1.73
   8  -1 -11    1.26    1.77
   9  -5 -20    0.37    1.98
   9  -4 -18    1.45    1.91
   9  -3 -16   -0.32    1.87
   9  -2 -13   -1.45    1.79
   9  -1  -8  263.07    2.46
   9  -1   6    0.99    2.42
  10  -5 -18   22.57    2.55
  10  -4 -16   81.08    2.23
  10  -3 -14   18.31    1.96
  10  -3  12   31.72    2.94
  10  -2 -10   15.30    1.86
  10  -1  -4   82.70    1.98
  10  -1  -3  189.39    2.29
  10  -1  -2  163.25    2.28
  10  -1  -1  128.95    2.51
  10  -1   0  132.99    2.57
  10  -1   1   40.35    2.30
  10  -1   2   38.57    1.89
  11  -5 -16    3.01    2.03
  11  -4 -14    7.48    2.05
  11  -3 -11   19.55    1.84
  11  -2  -6  204.15    2.53
  11  -2   5   34.21    2.32
  12  -6  14   -0.03    3.32
  12  -4 -11    6.43    1.97
  12  -4 -10   36.93    2.50
  12  -4  10  144.36    3.13
  12  -3  -7    2.09    1.95
  12  -3  -6   98.14    2.52
  12  -3   6   71.44    2.55
  13  -5   9    3.91    2.54
  13  -4  -6    2.77    2.04
  13  -4  -5    1.06    2.06
  13  -4  -4    9.15    2.53
  13  -4   5    2.00    2.44
 -17 -12   0    1.23    1.89
 -16 -10 -11   26.52    2.38
 -16 -10 -10   38.91    2.45
 -16 -10  -9   17.48    2.34
 -16 -10  -8    0.53    2.27
 -16 -10  -7    0.85    2.22
 -16 -10  -6   24.42    2.39
 -15 -12   9    0.24    1.93
 -15 -10 -19    0.94    2.94
 -15 -10   3    4.44    2.13
 -15  -9 -12  196.33    3.27
 -15  -9 -11   78.69    2.52
 -15  -9 -10  145.65    2.42
 -15  -9  -6   11.81    1.87
 -15  -9  -5   21.41    1.81
 -15  -9  -4   89.72    2.50
 -14 -12  12   17.19    1.99
 -14 -11  10   17.01    1.87
 -14 -10   7   15.21    1.77
 -14  -9   3   25.48    1.79
 -14  -8 -11  191.04    2.93
 -14  -8 -10   22.60    2.20
 -14  -8  -5   49.55    1.93
 -14  -8  -4   66.71    2.33
 -13 -11  13   18.84    1.86
 -13  -7 -10   24.00    2.36
 -13  -7  -9    3.77    2.08
 -13  -7  -8    4.06    2.02
 -13  -7  -7   11.30    2.03
 -13  -7  -6   68.16    2.21
 -13  -7  -5   63.01    2.24
 -13  -7  -4  229.06    2.71
 -12 -11  15   -1.01    1.78
 -12 -10 -27    3.07    4.42
 -12 -10  13    1.94    1.77
 -12  -9  11   35.25    2.16
 -12  -7   3  169.77    2.12
 -11 -11  17   28.21    1.87
 -11  -8  11   43.05    2.14
 -10 -11  19    0.99    1.90
 -10  -8  13    4.33    1.67
 -10  -6   7    1.12    1.69
 -10  -5   1  230.42    2.24
  -9 -10  19    2.18    1.73
  -9  -7  13    1.79    1.62
  -9  -6  10    6.21    1.63
  -9  -5   6   65.01    1.80
  -9  -4 -10  108.30    3.02
  -9  -4  -2   38.37    1.83
  -8 -11  22   23.23    2.40
  -8  -9  19    2.34    1.72
  -8  -8  17  117.88    1.99
  -8  -7  15   45.93    1.74
  -8  -5   9  114.16    1.91
  -8  -4   4   61.70    1.85
  -6 -10  23    1.74    1.86
  -6  -8  20   82.66    2.02
  -6  -6 -26   46.75    2.67
  -6  -6  16   19.29    1.69
  -6  -3   6  728.04    3.58
  -5 -10  24   19.28    2.37
  -5  -8 -31    6.63    2.39
  -5  -7 -29   32.87    2.35
  -5  -6 -27   34.52    2.31
  -4  -6  19   12.20    2.02
  -4  -4  14   60.53    1.87
  -4  -2   6   38.93    2.02
  -3  -8  23    5.86    1.78
  -3  -7 -30   32.59    2.48
  -3  -6 -28   24.20    2.33
  -3  -6  20   16.73    2.09
  -3  -5 -26    2.01    2.09
  -3  -5  18    1.41    2.03
  -3  -3 -20    2.86    2.07
  -3  -1  -8  581.39    8.46
  -3  -1   1   23.66    2.37
  -2  -9  25    4.29    2.28
  -2  -5  19   44.83    2.16
  -2  -4 -24   78.00    1.94
  -2  -3 -21   14.84    2.08
  -2  -3  14  217.95    2.58
  -2  -2 -17   20.70    2.19
  -1  -7  23   22.25    2.27
  -1  -3  15  294.09    2.90
  -1  -2 -18   99.88    2.49
  -1  -1 -13    2.38    2.08
  -1  -1   7  558.67    3.88
   0  -7 -30   12.58    2.47
   0  -6  22   74.49    2.38
   0  -3 -22   45.81    1.88
   0  -1 -14    2.36    2.05
   0   0  -5    4.55    3.13
   1  -9  26   35.70    2.56
   1  -8  25    8.61    2.28
   1  -3 -22   27.18    1.78
   1  -2 -19   80.04    1.97
   1   0  -8    4.65    1.99
   2  -9  26    0.79    2.36
   2  -8  25   32.49    2.46
   2  -7  24   20.13    2.25
   2  -5  21   13.48    2.09
   2  -4 -24   25.83    2.23
   2  -3 -22    0.34    1.72
   2  -3  17   35.25    2.17
   2  -2 -19   98.34    1.95
   2  -1 -15  105.42    2.07
   2   0  -9   47.12    2.17
   3  -7  24   52.37    2.44
   3  -5 -26    0.77    1.83
   3  -4 -24    3.52    1.67
   3  -1 -15  229.93    2.35
   3   0  -9    7.09    2.36
   4  -8  25    2.40    2.69
   4  -7  24   18.84    2.74
   4  -6 -27   12.78    2.00
   4  -3 -21  186.94    2.20
   4  -2 -18  109.26    2.43
   4   0  -9  343.70    2.75
   5  -6 -26    3.51    2.35
   5  -5  21   18.72    2.89
   5  -1 -14    9.91    1.71
   5   0  -8   24.00    1.78
   6  -6 -25    1.16    2.40
   6  -4 -22   15.52    1.86
   6  -4  19   12.22    3.34
   6  -1 -13  428.50    2.75
   6   0  -7   13.91    1.81
   7  -3 -18    2.44    2.16
   7  -2 -15  158.56    2.43
   7   0  -5   37.62    1.88
   7   0  -4  490.79    2.97
   7   0  -3   13.50    2.16
   7   0   2    8.57    2.18
   8  -5 -21   46.34    2.09
   8  -4 -19   62.92    2.06
   8  -3 -17    0.73    1.76
   8  -2 -14   51.61    1.90
   8  -2  12   74.28    3.84
   8  -1 -10   78.96    1.98
   8  -1  -9    1.33    2.13
   8  -1   8    4.45    2.35
   9  -3 -15   23.24    1.91
   9  -2 -12   70.52    1.94
   9  -1  -7   63.23    2.01
   9  -1  -6  239.00    2.66
  10  -4 -15   26.50    2.38
  10  -3 -13  128.06    2.24
  10  -2  -9   53.52    1.95
  10  -2   8   18.92    2.67
  11  -6  16   22.83    4.07
  11  -5 -15    2.46    2.03
  11  -4 -13   -0.85    1.96
  11  -3 -10    4.89    1.79
  11  -3  -9    1.95    2.29
  11  -3   9    4.56    2.60
  11  -2  -5   12.33    1.85
  11  -2  -4  299.18    2.68
  11  -2  -3   -1.75    2.34
  11  -2   3   34.59    2.32
  11  -2   4   78.67    2.56
  12  -5 -12    9.65    2.09
  12  -5  12   13.39    2.91
  12  -4  -9    7.87    1.98
  12  -4   9    6.56    2.79
  12  -3  -5    2.45    1.93
  12  -3  -4   27.64    2.40
  12  -3   4  106.42    2.68
  12  -3   5    5.83    2.38
  13  -5  -8    5.69    2.14
  13  -5  -7    7.31    2.60
  13  -5   8   48.76    2.85
  13  -4  -3    4.32    1.99
  13  -4  -2   46.40    2.17
  13  -4  -1    5.42    2.51
  13  -4   0  100.45    2.80
  13  -4   1    9.49    2.53
  13  -4   2   51.33    2.71
  13  -4   3    4.33    2.47
  13  -4   4    2.23    2.02
 -17 -12   1    0.58    1.95
 -17 -12   2    5.99    2.45
 -17 -11 -11    6.10    2.70
 -17 -11 -10    5.41    2.29
 -17 -11  -9    6.30    2.38
 -17 -11  -8   10.53    2.39
 -17 -11  -7   -0.36    2.39
 -17 -11  -6    1.29    2.33
 -16 -12   6    2.16    1.93
 -16 -11 -19    7.30    2.81
 -16 -11   3   10.89    2.33
 -16 -10 -13   20.12    2.70
 -16 -10 -12   85.36    2.69
 -16 -10  -5   21.15    1.97
 -16 -10  -4   60.02    2.05
 -16 -10  -3   67.55    2.48
 -15 -12  10   10.12    1.94
 -15 -11   7    8.63    1.90
 -15 -10   4   30.94    2.27
 -15  -9 -13   40.03    2.75
 -15  -9  -3   43.91    1.93
 -15  -9  -2  121.61    2.52
 -14 -11  11   62.64    2.49
 -14 -10   8    3.81    1.80
 -14  -9 -19    1.09    3.15
 -14  -9   4   28.72    1.82
 -14  -8 -13  167.27    3.19
 -14  -8 -12   57.59    2.44
 -14  -8  -3   74.26    1.97
 -14  -8  -2  119.60    2.47
 -13 -10  11   49.62    1.92
 -13  -9   8    2.02    1.67
 -13  -8   4  175.89    2.21
 -13  -7 -11   63.83    2.54
 -13  -7  -3   93.19    2.00
 -13  -7  -2  159.18    2.46
 -12  -8   8   20.08    1.72
 -12  -7   4    8.66    1.67
 -12  -6  -8    3.69    2.08
 -12  -6  -7  157.17    2.55
 -12  -6  -6   47.84    2.14
 -12  -6  -5  187.10    2.54
 -12  -6  -4   38.76    2.15
 -11 -10  16    7.68    1.80
 -11  -9  14    1.34    1.75
 -11  -7   8    7.18    1.64
 -11  -6 -16  361.11    5.34
 -11  -6   3    3.53    1.66
 -10 -10  18   15.32    1.82
 -10  -9 -28    2.45    3.34
 -10  -9  16   97.30    2.03
 -10  -8  14   15.27    1.74
 -10  -7  11   73.88    1.76
 -10  -5 -14   65.52    3.56
 -10  -5   2   78.52    1.85
  -9 -11  21    1.20    1.83
  -9  -9  18   39.07    1.89
  -9  -8  16  104.87    1.98
  -9  -4  -1  277.94    2.53
  -9  -4   0  473.09    3.17
  -8 -10  21   30.02    1.89
  -8  -7 -26   18.27    2.58
  -8  -6  13   -0.84    1.63
  -8  -4   5    0.89    1.73
  -7 -10  22    4.60    1.84
  -7  -9  21    8.57    2.13
  -7  -8  19    6.01    1.73
  -7  -7  17    3.18    1.66
  -7  -6  15  188.89    2.12
  -7  -5  12    3.15    1.57
  -7  -4   8    3.85    1.67
  -7  -3   2   60.02    2.00
  -6  -9  22    7.04    1.79
  -6  -8 -30   30.58    2.85
  -6  -7 -28   13.49    2.60
  -6  -5 -23  127.66    3.01
  -6  -5  14   18.26    1.70
  -6  -4  11    6.24    2.00
  -5  -9  23    6.66    1.75
  -5  -7  20    5.73    1.68
  -5  -6  18   28.84    1.71
  -5  -5 -24   44.01    2.51
  -5  -4 -21   12.74    2.42
  -5  -4  13    5.16    2.06
  -5  -3 -17   99.52    2.86
  -5  -3   9   45.88    1.79
  -5  -2   3    8.73    1.99
  -4 -10  25   44.09    2.10
  -4  -9  24   17.70    2.35
  -4  -8 -31   40.97    2.55
  -4  -7  21   58.78    1.87
  -4  -5 -25    0.10    2.08
  -4  -5  17   15.27    1.61
  -4  -3  11  118.00    1.97
  -3  -4 -23    2.13    2.03
  -3  -4  16   62.97    2.16
  -3  -3  13   89.57    2.31
  -3  -2   9   50.32    2.44
  -2  -8  24    1.83    1.76
  -2  -7 -30   21.27    1.97
  -2  -6  21   46.28    1.83
  -2  -4  17    3.43    2.03
  -2  -1 -11  318.54    3.97
  -2  -1   5  392.59    3.54
  -1  -7 -30   10.68    1.99
  -1  -5  20   29.88    2.12
  -1  -4 -24  186.91    2.33
  -1  -4  18  260.61    2.71
  -1  -3 -21  109.02    2.37
  -1  -2  12    3.38    1.78
   0  -9  26   35.52    2.55
   0  -8  25    2.16    2.28
   0  -6 -28   66.81    2.46
   0  -4 -24   88.31    2.34
   0  -3  16  215.34    2.49
   0  -2 -18    0.42    2.04
   0  -2  13  127.52    2.24
   0  -1   9  542.18    4.14
   1  -7  24    0.48    2.15
   1  -6 -28   25.89    1.99
   1  -5 -26    2.73    2.22
   1  -5  21  154.25    2.62
   1  -4 -24   13.12    1.80
   1  -4  19    2.51    1.91
   1  -2  14  348.36    3.30
   1  -1  10   17.56    2.38
   1   0  -7   37.36    2.65
   2  -5 -26   25.81    1.87
   2   0  -8   50.36    2.61
   3  -6 -27   -0.82    2.27
   3  -6  23    4.48    2.52
   3  -3 -21   74.40    1.93
   3  -2 -18    1.38    1.70
   4  -5 -25   79.62    2.11
   4  -4 -23   65.99    1.93
   4  -1 -14  137.15    2.13
   4   0  -8   54.03    2.04
   5  -5 -24   19.55    1.93
   5  -4 -22   90.96    2.08
   5  -3 -20  109.84    2.05
   5  -2 -17    9.02    1.76
   5  -1 -13   38.45    1.78
   5   0  -7   45.95    1.91
   5   0   5  272.67    4.15
   6  -5 -23    4.82    1.89
   6  -4 -21    1.09    1.80
   6  -3 -19    4.01    1.76
   6  -3  17    3.50    3.84
   6  -2 -16   53.70    1.88
   6  -1 -12   20.75    1.76
   6   0  -6    0.04    1.77
   6   0  -5   82.74    2.44
   6   0   4   16.27    2.31
   7  -5 -22   57.08    2.08
   7  -4 -20    4.56    1.86
   7  -2  13    2.57    4.52
   7  -1 -11   14.62    1.70
   7   0  -2  313.29    2.75
   7   0  -1   31.52    1.99
   7   0   0   81.25    2.17
   7   0   1  107.16    2.21
   8  -3 -16   64.20    1.91
   8  -2 -13    7.85    1.71
   8  -1  -8  308.85    2.80
   9  -5 -19    2.59    1.92
   9  -4 -17    1.69    1.86
   9  -3 -14   83.44    2.04
   9  -2 -11   38.44    1.90
   9  -1  -5    5.14    1.82
   9  -1   5    2.42    2.18
  10  -5 -17    3.92    1.95
  10  -3 -12   15.36    1.85
  10  -2  -8    0.71    1.78
  10  -2  -7   -1.30    2.26
  11  -5 -14    0.32    1.94
  11  -5  14    0.93    3.43
  11  -4 -12   13.92    1.98
  11  -4  12   51.81    3.00
  11  -3  -8   51.61    2.45
  11  -2  -2   75.64    2.06
  11  -2  -1    4.49    1.83
  11  -2   0    0.57    1.82
  11  -2   1   11.46    1.86
  11  -2   2   64.29    2.10
  12  -5 -11   10.24    2.10
  12  -4  -8   10.86    1.94
  12  -3  -3    3.72    1.91
  12  -3  -2    0.89    1.95
  12  -3  -1   -0.17    1.93
  12  -3   0   44.13    2.39
  12  -3   1    2.10    2.42
  12  -3   2  108.01    2.63
  12  -3   3    6.29    1.99
  13  -6  10    6.91    2.63
  13  -5  -6    5.58    2.19
  13  -5  -5    9.60    2.59
  13  -5   7    3.31    2.60
 -17 -11 -13    7.74    2.76
 -17 -11  -5   14.62    1.99
 -17 -11  -4    3.57    2.40
 -17 -11  -3   28.57    2.45
 -16 -11   4   12.95    2.37
 -16 -10 -14   33.51    2.78
 -16 -10  -2   49.61    2.42
 -16 -10  -1   71.79    2.55
 -15 -11   8    0.99    1.85
 -15 -10   5   10.36    2.25
 -15  -9 -14  103.61    3.04
 -15  -9  -1   44.82    1.89
 -14 -10   9    6.78    2.18
 -14  -9   5   70.34    1.97
 -14  -8  -1   12.04    1.77
 -14  -8   0   46.78    2.25
 -13 -11  14   -0.94    1.87
 -13 -10  12   92.62    2.44
 -13  -9   9    1.49    1.73
 -13  -8   5   33.94    1.78
 -13  -7 -12   61.15    2.69
 -13  -7  -1   99.96    2.35
 -12 -11  16   16.49    1.92
 -12  -9  12  124.79    2.04
 -12  -8   9    1.85    1.67
 -12  -7   5  253.26    2.29
 -12  -6 -10   54.34    2.56
 -12  -6  -9   32.15    2.27
 -12  -6  -3  183.85    2.61
 -12  -6  -2    6.79    2.13
 -11 -11  18    8.30    1.89
 -11  -8  12    7.14    1.67
 -11  -7   9    0.07    1.63
 -11  -6   4  112.12    1.90
 -10 -11  20    2.53    1.87
 -10  -7  12   39.60    2.12
 -10  -6   8  153.87    1.99
 -10  -5   3  213.56    2.22
  -9 -10  20   11.08    1.87
  -9  -8 -27    2.18    2.88
  -9  -7  14    6.44    1.63
  -9  -6  11  253.44    2.23
  -9  -5   7   65.35    1.80
  -9  -4 -11   13.63    2.60
  -9  -4   1  377.04    2.95
  -8  -9  20    2.15    1.74
  -8  -8  18    1.35    1.69
  -8  -7  16   91.52    1.92
  -8  -6 -23   59.36    3.12
  -8  -5  10  146.90    1.97
  -8  -4   6   48.73    2.17
  -7  -8 -29   21.59    2.74
  -7  -7 -27   12.02    2.58
  -7  -4   9   60.21    1.79
  -7  -3   3   40.12    1.86
  -6  -8  21   25.73    2.13
  -6  -7  19  135.07    2.04
  -6  -6  17   52.26    1.74
  -6  -3   7   66.42    1.89
  -5  -8  22    1.85    1.75
  -5  -5  16   96.59    1.86
  -5  -2   4  229.38    2.91
  -4  -8  23   16.82    2.22
  -4  -7 -29   46.97    2.44
  -4  -6 -27    1.72    2.17
  -4  -4 -22   29.34    2.20
  -4  -4  15    3.04    2.03
  -4  -2   7 1266.35    4.44
  -3  -9  25    1.86    2.31
  -3  -8 -31   13.95    2.42
  -3  -1   2  103.32    2.63
  -2  -7  23   74.82    2.35
  -2  -2  11  292.92    2.73
  -1  -9  26    0.17    2.43
  -1  -8  25    1.76    2.26
  -1  -6 -28    3.81    1.81
  -1  -6  22  105.59    2.14
  -1  -5 -26   79.88    2.06
   0  -7  24   12.80    2.19
   0  -5 -26  122.22    2.19
   0  -5  21  135.43    2.51
   0  -4  19   63.80    2.19
   0  -3 -21  239.44    2.44
   0   0  -4    1.27    2.87
   1  -7 -29    1.18    2.37
   1  -6  23    1.59    2.07
   1  -3 -21   18.36    2.11
   1  -3  17    2.05    2.05
   1  -2 -18    2.43    1.63
   1  -1 -14   97.81    2.13
   2  -6 -27    5.18    2.25
   2  -6  23   38.63    2.30
   2  -3 -21    0.70    1.68
   2  -2 -18   26.32    1.74
   2  -1 -14   40.45    1.86
   2  -1  11   48.11    2.86
   3  -5 -25   13.90    1.76
   3  -4 -23    0.30    1.72
   3  -2  15   16.94    2.38
   3  -1 -14   53.37    1.93
   3   0  -8  101.48    2.30
   4  -6 -26   43.49    2.05
   4  -6  23   79.24    2.64
   4  -3 -20    2.85    1.76
   4  -2 -17  160.32    2.15
   4  -2  15   16.81    2.66
   4   0  -7  119.00    2.61
   5  -8  25   14.17    2.88
   5  -7  24    6.37    2.69
   5  -6 -25   12.80    2.36
   5  -3 -19    0.94    2.10
   5   0  -6    6.09    2.28
   6  -6 -24    1.06    1.91
   6  -5  21   19.54    3.50
   6  -3 -18    8.57    2.18
   6  -2 -15   88.49    2.37
   6  -1 -11  523.82    3.19
   6   0  -4  131.34    2.26
   6   0   3   59.45    2.49
   7  -6 -23   -0.19    1.96
   7  -5 -21   -0.37    2.29
   7  -4 -19   92.27    2.49
   7  -3 -17   94.98    2.07
   7  -2 -14    8.23    1.77
   7  -1 -10   25.41    1.77
   7  -1   9  115.71    3.55
   8  -5 -20   19.72    1.99
   8  -4 -18   11.18    1.88
   8  -3 -15   31.89    2.25
   8  -2 -12   27.05    1.80
   8  -1  -7    3.42    2.15
   8  -1   7    7.04    2.43
   9  -5 -18   13.31    1.98
   9  -4 -16   40.76    2.00
   9  -3 -13    0.95    2.23
   9  -2 -10  133.25    2.15
   9  -2  10   64.99    2.80
   9  -1  -4   68.73    2.01
   9  -1  -3  179.61    2.30
   9  -1  -2   32.41    2.26
   9  -1   3   84.06    2.50
   9  -1   4    4.84    2.23
  10  -5 -16   36.64    2.08
  10  -5  16   16.03    3.93
  10  -4 -14   77.44    2.15
  10  -4  14    0.64    3.18
  10  -3 -11  162.60    2.29
  10  -2  -6   14.86    1.85
  10  -2   7  205.18    3.00
  11  -4 -11   28.33    1.98
  11  -3  -7   17.93    1.92
  11  -3   8   44.82    2.77
  12  -6  13    4.84    3.29
  12  -5 -10   10.49    2.00
  12  -5  11   38.68    3.02
  12  -4  -7    7.04    1.87
  12  -4   8  101.44    2.81
  13  -6   9    7.35    3.06
  13  -5  -4   35.17    2.25
  13  -5  -3    3.08    2.61
  13  -5   5   10.97    2.58
  13  -5   6   85.51    2.96
 -17 -11 -14    0.51    2.73
 -17 -11  -2   19.95    1.99
 -17 -11  -1   54.80    2.62
 -16 -11   5   16.82    1.91
 -16 -10   0   39.60    2.40
 -15 -11   9   -0.13    1.94
 -15 -10 -20   18.68    3.79
 -15 -10   6   34.35    2.36
 -15  -9   0   80.60    1.99
 -15  -9   1   13.46    2.26
 -14 -11  12    1.32    1.88
 -14  -9   6   11.42    1.76
 -14  -8 -14   22.96    2.60
 -14  -8   1    1.76    2.11
 -13 -11  15    2.94    2.34
 -13  -9  10   19.64    1.83
 -13  -8 -19    4.62    3.76
 -13  -8   6  145.20    2.11
 -13  -7 -13   64.02    2.78
 -13  -7   0    2.37    1.65
 -13  -7   1   12.27    2.06
 -12 -11  17    1.24    1.86
 -12 -10  15    1.63    1.88
 -12  -9  13   17.60    2.21
 -12  -8  10    2.23    1.71
 -12  -7   6    1.32    1.73
 -12  -6 -11    2.08    2.42
 -12  -6  -1   56.26    1.83
 -11 -10  17   56.86    1.99
 -11  -9  15   39.82    1.89
 -11  -6   5    8.14    1.70
 -11  -5  -6  165.28    2.59
 -11  -5  -5    6.07    2.04
 -10 -10  19    1.52    1.81
 -10  -9  17   52.77    1.93
 -10  -8  15   -0.71    1.68
 -10  -6   9   49.96    1.76
 -10  -5   4   24.38    1.69
  -9  -9 -29   -0.16    2.78
  -9  -9  19   18.19    1.85
  -9  -8  17   68.88    1.89
  -9  -6  12   23.09    2.04
  -9  -5   8    9.76    1.66
  -9  -4   2  795.95    3.67
  -8 -10  22    4.64    1.80
  -8  -9 -30    5.33    2.34
  -8  -8 -28    2.68    2.63
  -8  -6  14   46.96    1.75
  -8  -5  11   13.10    1.68
  -7 -10  23    0.52    1.83
  -7  -8  20   32.61    1.81
  -7  -7  18    2.67    1.66
  -7  -6  16   85.13    1.90
  -7  -5  13   18.02    1.71
  -7  -3   4    0.40    1.71
  -6 -10  24   18.08    1.96
  -6  -9  23    0.71    2.19
  -6  -5  15  156.02    2.04
  -6  -4  12    1.74    1.65
  -6  -2  -5  422.86    4.35
  -6  -2  -4  813.25    4.87
  -6  -2  -3  207.99    3.03
  -6  -2  -2  524.82    3.94
  -5 -10  25   28.69    1.99
  -5  -9  24   13.70    2.27
  -5  -8 -30   50.90    2.58
  -5  -7  21  174.84    2.51
  -5  -6 -26    0.83    2.38
  -5  -6  19   41.07    1.76
  -5  -3  10    4.97    1.70
  -4  -7  22    2.71    2.10
  -4  -6  20  184.05    2.22
  -4  -5  18   43.41    1.81
  -4  -3 -18   89.79    2.67
  -4  -3  12   46.91    1.81
  -3  -8  24   51.03    2.01
  -3  -7 -29    6.35    2.27
  -3  -6 -27   13.28    2.21
  -3  -6  21    2.29    1.70
  -3  -5 -25    1.60    2.09
  -3  -5  19  187.52    2.26
  -3  -3 -19   90.21    2.64
  -3  -2 -15  102.45    2.59
  -3  -1   3    5.89    2.71
  -2  -9  26    0.96    2.32
  -2  -7 -29    1.53    2.29
  -2  -5  20   46.71    2.16
  -2  -4 -23   53.21    1.89
  -2  -3 -20  166.19    2.34
  -2  -3  15    3.54    2.00
  -2  -2 -16  473.85    3.69
  -2  -1   6   72.79    2.38
  -1  -7 -29    9.37    2.35
  -1  -7  24   40.12    2.29
  -1  -4 -23   14.08    2.14
  -1  -3  16   45.89    2.14
  -1  -2 -17  261.86    2.68
  -1  -1 -12   38.50    2.34
  -1  -1   8    2.87    1.95
   0  -7 -29   13.62    1.96
   0  -6  23   15.59    2.18
   0  -1 -13   93.73    2.12
   0   0  -3  111.66    4.58
   1  -6 -27   17.92    2.36
   1  -4 -23   15.27    2.12
   1   0  -6  198.52    3.01
   2  -5 -25    5.25    1.74
   2  -4 -23   21.03    1.77
   2  -4  20  145.45    2.70
   2  -2  15  362.11    3.63
   2   0  -7  378.53    3.21
   3  -6 -26   17.44    2.27
   3  -4  20    8.35    2.02
   3  -3 -20  166.39    2.16
   3  -2 -17  400.76    2.68
   3  -1 -13  150.80    2.47
   3   0  -7  124.40    2.40
   4  -5 -24    2.78    1.85
   4  -4 -22   -1.12    1.72
   4  -4  20   19.54    2.48
   4  -1 -13   20.64    1.84
   4   0   5   78.64    4.08
   5  -6  23   38.16    3.05
   5  -5 -23    5.03    1.87
   5  -4 -21    5.59    1.75
   5  -2 -16    6.09    1.77
   5  -2  15   19.93    3.93
   5  -1 -12   89.60    2.00
   5   0  -5    0.89    1.93
   6  -5 -22   14.55    1.86
   6  -4 -20    8.67    1.82
   6  -1  10   29.99    3.98
   6   0  -3  476.37    3.19
   6   0  -2  375.38    3.07
   6   0  -1  352.81    3.39
   6   0   0  287.99    3.31
   6   0   1   92.62    2.68
   6   0   2   15.92    2.46
   7  -7  23    2.27    4.33
   7  -6 -22   26.62    2.48
   7  -3 -16    2.11    1.76
   7  -2 -13   77.64    1.98
   7  -1  -9    0.45    1.66
   8  -6 -21    2.70    2.04
   8  -5 -19   15.39    1.94
   8  -4 -17   11.84    1.84
   8  -2 -11   22.60    1.82
   8  -1  -6  660.23    3.30
   9  -6 -19    2.27    2.01
   9  -6  19   12.43    5.68
   9  -5 -17    4.99    2.37
   9  -4 -15    3.62    1.87
   9  -3  13    0.62    3.33
   9  -2  -9   60.62    1.95
   9  -1  -1  383.67    2.83
   9  -1   0    2.55    1.78
   9  -1   1  397.67    2.96
   9  -1   2    3.20    1.87
  10  -6 -17    1.75    2.02
  10  -5 -15   -0.08    1.97
  10  -4 -13    4.82    1.93
  10  -3 -10    5.88    1.85
  10  -3  11    1.60    2.54
  10  -2  -5   92.83    2.08
  10  -2  -4   71.54    2.33
  10  -2   6   26.73    2.30
  11  -4 -10   22.23    1.94
  11  -4  11  118.76    3.22
  11  -3  -6  102.89    2.19
  11  -3  -5   44.95    2.38
  11  -3   7   53.40    2.94
  12  -5  -9   12.88    2.02
  12  -5  -8    7.33    2.47
  12  -4  -5    1.38    1.95
  12  -4  -4    4.50    2.40
  12  -4   6    1.16    2.73
  12  -4   7    8.83    2.45
  13  -6   8   12.05    3.01
  13  -5  -2   85.40    2.43
  13  -5  -1    3.14    2.11
  13  -5   0   97.58    2.93
  13  -5   1    7.19    2.58
  13  -5   2   30.32    2.70
  13  -5   3   16.53    2.65
  13  -5   4   17.57    2.63
 -17 -11 -15    0.83    2.77
 -17 -11   0   12.07    1.95
 -16 -11   6   13.28    1.92
 -16 -10 -15    7.08    2.73
 -16 -10   1   58.46    2.04
 -15 -11  10   10.55    1.79
 -15  -9 -15    3.87    2.60
 -15  -9   2   41.78    1.89
 -14 -11  13   26.93    2.05
 -14 -10  10    0.22    1.84
 -14  -9   7   53.93    1.91
 -14  -8   2    2.55    1.69
 -13 -10  13   28.94    1.96
 -13  -8   7   13.12    1.74
 -13  -7   2   72.03    2.27
 -12  -7 -18    7.64    3.67
 -12  -7   7   93.70    1.89
 -12  -6   0   16.20    1.75
 -12  -6   1   14.99    1.98
 -11  -8  13   25.98    1.73
 -11  -7  10   70.64    1.87
 -11  -6   6   50.17    1.76
 -11  -5  -8  109.10    2.54
 -11  -5  -7    1.09    2.01
 -11  -5  -4   95.48    2.07
 -11  -5  -3   10.11    1.73
 -11  -5  -2   12.08    2.08
 -10  -7  13    7.98    1.70
 -10  -5   5   65.24    1.85
  -9 -10  21   -0.53    1.77
  -9  -7  15   45.45    1.81
  -9  -6 -21   66.80    4.29
  -9  -4   3   97.15    2.35
  -8  -9  21   25.92    1.87
  -8  -8  19   26.95    1.74
  -8  -7  17   55.58    1.83
  -8  -4   7   18.93    1.71
  -8  -3  -6  214.87    3.20
  -8  -3  -5   10.93    2.14
  -8  -3  -4   65.85    2.30
  -8  -3  -3    6.74    2.08
  -8  -3  -2   41.20    2.24
  -7  -9  22   16.10    1.85
  -7  -6 -24   61.54    2.73
  -7  -5 -21   31.00    2.97
  -7  -4  10   20.66    1.63
  -7  -3   5  194.23    2.51
  -6  -7  20   35.21    1.79
  -6  -6 -25   26.53    2.53
  -6  -6  18    4.56    1.64
  -6  -4 -19   15.74    2.64
  -6  -3   8  428.09    2.73
  -6  -2  -6  353.48    4.44
  -6  -2  -1   51.17    2.13
  -5  -8  23    0.76    2.11
  -5  -7 -28    4.35    2.16
  -5  -5  17    0.88    1.67
  -5  -4  14   91.28    1.92
  -5  -2   5  164.26    2.40
  -4  -9  25   43.34    2.04
  -4  -5 -24   12.31    2.10
  -4  -2 -13  344.49    4.70
  -4  -2   8   20.35    1.86
  -3  -7  23   27.12    1.87
  -3  -4 -22    2.75    2.08
  -3  -4  17   32.51    1.80
  -3  -3  14   60.33    1.89
  -3  -2  10  159.82    2.33
  -2  -8  25   41.78    2.01
  -2  -6 -27   -1.32    2.14
  -2  -6  22   33.56    1.82
  -2  -5 -25   58.07    2.33
  -2  -4  18  180.90    2.24
  -1  -6 -27   21.60    2.30
  -1  -5 -25   27.81    2.23
  -1  -5  21    1.47    2.11
  -1  -3 -20  376.56    3.08
  -1  -2  13    0.15    1.78
   0  -6 -27    2.10    1.81
   0  -5 -25   20.85    2.16
   0  -4 -23   21.17    1.69
   0  -3  17   63.76    2.26
   0  -2 -17  140.46    2.14
   0  -2  14  109.47    2.46
   1  -8  26   25.89    2.43
   1  -5 -25   74.92    1.98
   1  -4  20  103.26    2.35
   1  -3 -20   15.15    2.11
   1  -2 -17   21.97    1.64
   1  -1 -13   10.47    1.88
   2  -8  26    1.21    2.34
   2  -7 -28    2.01    1.91
   2  -7  25   11.89    2.30
   2  -5  22    3.48    2.10
   2  -3 -20  152.03    2.10
   2  -3  18    2.96    2.04
   2  -2 -17  107.88    2.03
   2  -1 -13   48.21    1.85
   2   0  -6  200.51    3.24
   3  -8  26    1.66    2.34
   3  -7 -27   17.93    2.40
   3  -7  25   -0.29    2.58
   3  -5 -24   32.15    1.93
   3  -5  22   50.27    2.35
   3  -4 -22   65.35    2.01
   3  -3  18   11.96    2.09
   3   0  -6  117.47    2.79
   3   0   5  104.09    6.29
   4  -6 -25    4.18    1.89
   4  -5  22   11.91    2.57
   4  -3 -19  215.93    2.32
   4  -3  18  154.79    3.17
   4  -2 -16   43.13    1.84
   4  -1 -12    7.63    1.81
   4   0  -6  142.17    2.41
   5  -6 -24   -1.16    1.81
   5  -3 -18   27.25    1.76
   5  -2 -15   27.05    1.76
   5  -1 -11  227.89    2.36
   5   0  -4   16.68    2.01
   5   0   4    3.01    2.39
   6  -6 -23   15.73    1.98
   6  -3 -17    2.38    1.72
   6  -2 -14  130.66    2.12
   6  -1 -10    2.44    1.74
   7  -5 -20  107.68    2.18
   7  -4 -18   10.44    1.80
   7  -1  -8    4.98    1.78
   8  -6 -20   16.91    2.02
   8  -3 -14   -0.22    1.77
   8  -1  -5   14.23    1.90
   8  -1   6   32.59    2.63
   9  -6 -18    9.04    2.47
   9  -3 -12  261.04    2.49
   9  -2  -8   35.71    1.88
  10  -6 -16   35.30    2.22
  10  -5 -14   16.16    2.42
  10  -4 -12   48.18    1.96
  10  -3  -9   68.59    2.01
  10  -2  -3  114.69    2.16
  10  -2  -2   83.52    2.45
  10  -2   5  193.51    2.83
  11  -6 -13    0.08    2.50
  11  -5 -11    5.70    2.41
  11  -4  -9   37.08    2.08
  11  -4  -8    3.95    2.23
  11  -3  -4   56.68    2.11
  11  -3  -3   43.73    2.45
  11  -3   6   48.29    2.45
  12  -6 -10    0.08    2.16
  12  -6  12    9.94    3.37
  12  -5  -7    1.90    2.43
  12  -5  10   44.81    2.70
  12  -4  -3   -0.46    1.91
  12  -4  -2   36.48    2.52
  12  -4   5    4.27    2.36
  13  -6  -4   44.24    2.87
  13  -6   7    5.01    2.68
 -17 -11   1   28.43    2.06
 -17 -11   2    0.77    2.40
 -16 -11   7   17.63    2.00
 -16 -10 -16    0.24    2.66
 -16 -10   2   11.65    1.94
 -16 -10   3    6.41    2.32
 -15 -10   7    7.66    1.75
 -15  -9   3    1.49    1.76
 -14 -10  11   62.13    2.05
 -14  -9 -20    0.64    3.91
 -14  -9   8    3.32    1.74
 -14  -8 -15   53.34    2.82
 -14  -8   3   14.64    1.77
 -13 -10  14   25.08    1.90
 -13  -9  11    7.07    1.80
 -13  -8   8   39.69    1.84
 -13  -7 -14   98.74    2.93
 -13  -7   3   16.70    1.73
 -12 -10  16   17.92    1.87
 -12  -9  14   28.54    1.83
 -12  -8  11   40.75    1.77
 -12  -7   8    9.90    2.07
 -12  -6 -12  111.94    2.88
 -12  -6   2    1.04    1.61
 -11 -10  18    3.63    1.84
 -11  -9 -26    3.73    3.53
 -11  -9  16   -0.79    1.75
 -11  -8  14    4.00    1.67
 -11  -7  11    0.59    1.67
 -11  -6   7    7.94    1.69
 -11  -5  -9   35.44    2.17
 -11  -5  -1    2.42    1.69
 -11  -5   0   30.94    2.10
 -10  -9  18   91.69    2.07
 -10  -8  16   88.24    1.95
 -10  -6  10  176.19    2.12
 -10  -5   6    1.80    1.63
  -9  -9  20    3.61    1.81
  -9  -8  18   73.48    1.96
  -9  -7 -24   44.08    3.15
  -9  -7  16    5.86    2.06
  -9  -6  13   49.78    1.75
  -9  -5   9  413.85    2.59
  -9  -4 -12   15.70    3.02
  -9  -4   4  250.90    2.66
  -8 -10  23    8.33    2.38
  -8  -6  15    4.34    1.65
  -8  -5  12   44.53    1.77
  -8  -4   8  110.70    1.90
  -8  -3  -7   61.84    2.73
  -8  -3  -1  110.46    2.14
  -8  -3   0  288.25    2.98
  -7 -10  24    0.38    1.86
  -7  -8  21   15.73    1.78
  -7  -7  19   23.52    1.75
  -7  -6  17  100.89    1.96
  -7  -5  14   44.46    1.81
  -7  -4  11   43.47    2.01
  -6  -8 -29   13.16    2.33
  -6  -8  22   38.80    1.91
  -6  -7 -27    1.05    2.48
  -6  -5  16   43.12    1.80
  -6  -4  13   69.46    1.83
  -6  -3   9   34.92    2.13
  -6  -2   0  512.65    3.47
  -6  -2   1   15.50    2.36
  -5  -5 -23   28.56    2.51
  -5  -4 -20   15.01    2.31
  -5  -3  11    1.20    1.62
  -4  -8 -30   10.18    1.94
  -4  -8  24   14.28    1.80
  -4  -7 -28   21.35    2.32
  -4  -6 -26   11.03    2.14
  -4  -6  21    6.13    2.14
  -4  -4 -21    2.98    2.09
  -4  -4  16   88.99    1.92
  -4  -3  13  151.47    2.16
  -3  -9  26    9.75    1.97
  -3  -8 -30    0.90    2.38
  -3  -8  25   13.42    2.31
  -3  -1   4  164.29    2.78
  -2  -8 -30    7.18    2.35
  -2  -7  24    2.41    1.81
  -2  -4 -22   77.73    2.39
  -2  -2  12  531.37    3.22
  -2  -1 -10  235.06    3.55
  -2  -1   7  160.50    2.90
  -1  -8 -30   11.40    1.95
  -1  -8  26    3.37    2.24
  -1  -6  23    8.15    1.76
  -1  -4  19  157.08    2.13
  -1  -2 -16   53.94    2.27
   0  -8  26   20.24    2.00
   0  -7 -28   16.80    2.37
   0  -7  25    0.43    2.18
   0  -3 -20   24.02    1.77
   0  -1 -12  101.13    2.62
   0  -1  10  243.48    2.91
   1  -7 -28    9.36    1.85
   1  -7  25    6.71    1.88
   1  -5  22   18.70    1.86
   1  -3  18    1.95    2.09
   1  -2  15  163.05    2.78
   1  -1  11    1.81    2.22
   1   0  -5   92.75    2.75
   2  -6 -26    7.39    1.86
   2  -6  24   33.46    2.64
   2  -5 -24    1.05    1.77
   2  -4 -22    7.95    1.71
   3  -6 -25    7.81    2.30
   3  -3 -19  235.79    2.26
   3  -2 -16    0.60    1.69
   3  -1 -12   38.23    1.83
   4  -8  26    8.47    2.84
   4  -7 -26   15.84    1.96
   4  -7  25    7.95    2.73
   4  -5 -23   73.93    1.99
   4  -4 -21   90.96    2.06
   4   0  -5    4.27    2.00
   5  -7 -25   -1.34    1.88
   5  -5 -22    6.04    1.84
   5  -4 -20   25.33    1.83
   5  -4  20   14.20    2.85
   5   0  -3  412.69    3.20
   5   0  -2  160.08    3.02
   5   0   3    5.09    2.47
   6  -7  24   14.70    3.60
   6  -5 -21   26.56    1.92
   6  -4 -19    6.22    1.73
   6  -3 -16  138.54    2.44
   6  -2 -13  189.54    2.26
   6  -1  -9  245.77    2.43
   7  -6 -21    7.63    1.97
   7  -6  22    2.46    4.32
   7  -4 -17   97.35    2.50
   7  -3 -15   71.03    1.94
   7  -2 -12    6.22    1.74
   7  -1  -7  126.87    2.14
   8  -5 -18    9.66    1.85
   8  -4 -16   -1.04    1.78
   8  -3 -13   74.00    1.94
   8  -2 -10  248.60    2.39
   8  -1  -4  593.87    3.27
   8  -1  -3   39.94    2.30
   8  -1   5   17.19    2.31
   9  -5 -16   29.23    1.99
   9  -4 -14  140.80    2.18
   9  -3 -11   68.64    2.00
   9  -2  -7    9.75    1.83
   9  -2  -6    5.46    2.19
   9  -2   9  108.35    3.00
  10  -6 -15   -0.90    2.44
  10  -5 -13    1.07    2.31
  10  -4 -11    6.95    1.85
  10  -3  -8    1.56    1.84
  10  -3  -7    3.76    2.15
  10  -3  10   58.06    2.85
  10  -2  -1   95.67    2.09
  10  -2   0  108.46    2.19
  10  -2   1    2.14    2.28
  10  -2   2   19.36    2.29
  10  -2   3   50.53    2.41
  10  -2   4    3.51    1.72
  11  -6 -12   12.43    2.50
  11  -6  15    7.28    3.21
  11  -5 -10    1.51    1.93
  11  -5  13   93.80    3.59
  11  -4  -7   30.95    2.00
  11  -4  10   41.47    2.86
  11  -3  -2    8.42    1.88
  11  -3  -1    1.78    2.33
  11  -3   0    5.27    2.31
  11  -3   4   43.13    2.42
  11  -3   5   56.05    2.48
  12  -6  -9   40.01    2.27
  12  -5  -6    1.51    1.99
  12  -5  -5    7.75    2.54
  12  -5   9   72.17    2.77
  12  -4  -1   14.11    2.00
  12  -4   0   92.07    2.30
  12  -4   1   35.65    2.08
  12  -4   2   92.34    2.72
  12  -4   3   39.06    2.58
  12  -4   4   68.03    2.21
  13  -6  -3    3.43    2.15
  13  -6  -2   62.52    2.38
  13  -6  -1    0.37    2.60
  13  -6   0   37.66    2.75
  13  -6   4   17.28    2.64
  13  -6   5    4.21    2.61
  13  -6   6   19.97    2.70
 -17 -11 -16    0.66    2.79
 -17 -11   3    1.30    1.91
 -16 -11   8    6.26    1.87
 -16 -10   4    2.28    1.88
 -16  -9  -7    0.85    2.30
 -16  -9  -6    4.59    2.22
 -16  -9  -5    2.74    2.30
 -15 -11  11    5.89    1.95
 -15 -10   8   10.23    1.82
 -15  -9 -16    6.51    2.60
 -15  -9   4    1.38    1.75
 -15  -8  -6    7.47    2.22
 -14 -10  12    2.48    1.88
 -14  -9   9   11.38    1.82
 -14  -8   4   55.83    1.99
 -13  -9  12   97.34    2.03
 -13  -8   9   -1.11    1.69
 -13  -7   4  192.54    2.22
 -12 -10  17    3.81    1.85
 -12  -9  15   -0.17    2.19
 -12  -8  12    0.43    1.73
 -12  -6   3  100.04    1.93
 -11 -10 -28   14.35    3.44
 -11 -10  19   25.08    1.99
 -11  -9  17  127.12    2.24
 -11  -7  12   68.34    2.22
 -11  -6   8   -1.98    1.67
 -11  -5 -10    0.80    2.42
 -11  -5   1    6.81    1.67
 -10  -9  19    8.13    1.82
 -10  -8 -25    7.34    3.17
 -10  -8  17    1.80    2.16
 -10  -7  14    4.45    1.68
 -10  -6  11  144.82    1.99
  -9 -10  22   24.48    1.97
  -9  -5  10   49.28    1.82
  -9  -4   5   35.31    1.80
  -8  -9  22    1.46    1.78
  -8  -8  20    4.51    1.75
  -8  -7 -25   41.45    3.05
  -8  -7  18   16.07    1.75
  -8  -3   1  294.86    2.56
  -7  -9 -30    8.37    2.34
  -7  -9  23    5.44    1.83
  -7  -7 -26    6.22    2.60
  -7  -5  15  103.01    2.23
  -7  -4 -17    4.65    3.43
  -7  -3   6   18.66    1.72
  -6  -9  24   10.67    1.87
  -6  -7  21  147.41    2.21
  -6  -6  19   43.43    1.78
  -6  -5 -22   17.97    2.42
  -6  -2  -7  176.00    3.94
  -6  -2   2   53.70    2.10
  -5  -9  25   41.68    2.09
  -5  -7  22   -1.49    1.74
  -5  -6  20  208.31    2.23
  -5  -5  18   -0.12    1.65
  -5  -4  15   52.53    1.76
  -5  -3 -16  129.80    3.32
  -5  -2   6  750.79    3.58
  -4  -9  26   19.59    2.49
  -4  -7  23   16.69    1.82
  -4  -5  19   62.81    1.85
  -4  -2   9  207.36    2.38
  -3  -7 -28   31.94    2.32
  -3  -6  22    9.78    1.74
  -3  -5 -24   12.47    2.13
  -3  -5  20   43.32    1.78
  -3  -4  18   14.19    2.06
  -3  -3  15   62.60    1.90
  -3  -2  11  159.07    2.28
  -2  -9  27   12.68    2.46
  -2  -7 -28    0.71    2.22
  -2  -6  23   57.68    2.22
  -2  -5  21    1.92    1.62
  -2  -3 -19    6.75    1.74
  -2  -3  16  271.19    2.35
  -1  -7 -28   -0.46    2.25
  -1  -7  25    0.57    2.23
  -1  -4 -22  168.18    2.57
  -1  -3  17  210.63    2.64
  -1  -1 -11  105.76    2.73
  -1  -1   9  806.87    4.27
   0  -6 -26   67.31    2.36
   0  -5  22   61.59    1.96
   0  -4 -22   23.96    2.15
   0  -4  20    8.87    1.70
   0  -2 -16    2.88    2.03
   1  -6 -26   13.09    1.83
   1  -6  24    0.94    2.21
   1  -5 -24    2.92    1.72
   1  -4 -22    8.53    1.71
   1  -2 -16   43.70    2.17
   1  -1 -12  384.23    3.06
   2  -7 -27    1.53    1.90
   2  -3 -19    3.80    1.69
   2  -2 -16  131.56    2.11
   2  -1 -12    4.86    1.86
   2   0  -5  969.17    4.91
   3  -6  24   56.65    2.50
   3  -5 -23   12.10    1.85
   3  -4 -21   19.25    1.80
   3  -1  12  267.89    4.40
   3   0  -5  548.47    3.66
   4  -6 -24   33.31    1.93
   4  -4 -20    7.45    2.14
   4  -3 -18   13.32    1.79
   4  -2 -15    2.75    1.69
   4  -1 -11    5.34    1.76
   4   0  -4  288.57    2.90
   5  -6 -23    2.27    1.81
   5  -5  22   69.67    3.26
   5  -3 -17   18.71    1.75
   5  -3  18   99.34    3.62
   5  -2 -14  260.24    2.37
   5  -1 -10  402.30    2.76
   5   0  -1  700.29    4.05
   5   0   0   83.93    2.76
   5   0   1  461.39    3.95
   5   0   2   -1.01    2.44
   6  -6 -22    3.68    1.93
   6  -5 -20   97.83    2.09
   6  -4 -18  125.99    2.11
   6  -1  -8   -1.39    1.77
   7  -7 -22   23.54    2.04
   7  -5 -19    3.09    1.84
   7  -3 -14    9.81    1.75
   7  -2 -11   10.52    1.76
   7  -1  -6  213.41    2.39
   7  -1   8   35.58    2.67
   8  -7 -20   16.99    2.48
   8  -6 -19    1.07    1.92
   8  -5 -17    5.90    1.85
   8  -4 -15   27.64    1.87
   8  -3 -12  100.70    2.40
   8  -2  -9   62.67    1.99
   8  -2  11   12.08    2.77
   8  -1  -2  111.32    2.06
   8  -1  -1   99.41    2.39
   8  -1   4  182.37    2.97
   9  -6 -17   12.32    1.96
   9  -5 -15   30.92    1.97
   9  -4 -13    5.08    1.87
   9  -3 -10  260.80    2.45
   9  -2  -5    2.91    2.12
   9  -2   8   24.32    2.71
  10  -4 -10   22.87    1.85
  10  -4  13   94.40    3.41
  11  -5  -9    9.19    2.02
  11  -4  -6    7.89    1.91
  11  -3   1   28.88    1.96
  11  -3   2   21.85    2.02
  11  -3   3   40.35    2.09
  12  -6  -8    1.89    2.10
  12  -6  -7    6.11    2.57
  12  -6  11   48.94    3.12
  12  -5  -4    1.75    1.99
  12  -5   8   43.08    2.71
  13  -6   1    0.41    2.14
  13  -6   2    2.21    2.18
  13  -6   3    1.63    2.15
 -17 -10  -9   56.69    2.60
 -17 -10  -8    0.02    2.36
 -17 -10  -7   21.50    2.02
 -17 -10  -6    3.06    1.92
 -17 -10  -5    2.17    1.90
 -17 -10  -4    2.13    2.36
 -17 -10  -3   32.96    2.52
 -16 -10 -17    0.02    3.04
 -16 -10   5    1.12    1.84
 -16  -9  -9    1.52    2.25
 -16  -9  -8  100.19    2.25
 -16  -9  -4   26.14    1.96
 -16  -9  -3    8.26    1.84
 -16  -9  -2  114.53    2.59
 -15 -10   9    4.60    1.87
 -15  -9   5   23.94    1.91
 -15  -8  -9  155.99    2.73
 -15  -8  -8   10.33    2.20
 -15  -8  -7   69.63    2.08
 -15  -8  -5    2.49    1.74
 -15  -8  -4   20.61    1.85
 -15  -8  -3   78.37    2.08
 -15  -8  -2    1.22    2.15
 -14  -9  10   -0.12    2.16
 -14  -8 -16   11.01    2.87
 -14  -8   5   20.42    1.75
 -14  -7  -7    1.09    1.97
 -14  -7  -6   26.45    2.22
 -14  -7  -5    1.52    2.14
 -14  -7  -4   76.15    2.42
 -14  -7  -3    8.20    2.11
 -13 -10  15    3.09    1.87
 -13  -9  13    7.29    1.83
 -13  -7   5   72.12    1.95
 -12  -8  13   32.55    1.80
 -12  -6 -13   83.91    2.84
 -12  -6   4   28.68    1.76
 -11  -8  15    0.74    1.78
 -11  -6   9   12.28    2.07
 -11  -5   2  112.86    2.00
 -11  -5   3    1.99    1.98
 -10 -10  21    4.03    1.93
 -10  -7  15    6.08    1.65
 -10  -6  12   74.84    1.81
 -10  -5 -15  136.41    4.64
 -10  -4  -6   18.98    2.07
 -10  -4  -5  353.60    3.15
 -10  -4  -4   20.24    2.20
 -10  -4  -3  110.27    2.04
 -10  -4  -2    0.36    1.97
 -10  -4  -1   38.30    2.01
  -9  -9  21   -0.02    1.80
  -9  -8 -26   12.31    3.13
  -9  -8  19   48.31    1.92
  -9  -7  17   83.06    1.99
  -9  -6  14   12.39    1.68
  -9  -5  11  552.47    2.83
  -9  -4   6   29.80    2.09
  -8  -9 -29    3.21    2.72
  -8  -8 -27    9.37    2.87
  -8  -6  16   65.38    1.82
  -8  -5 -19   33.69    3.78
  -8  -5  13    1.79    1.60
  -8  -4   9    4.93    1.59
  -8  -3  -8  151.59    3.13
  -8  -3   2  427.10    2.79
  -7  -8 -28    0.07    2.23
  -7  -8  22   68.98    1.98
  -7  -7  20   22.65    1.76
  -7  -6  18    7.68    1.66
  -7  -4  12   -0.66    1.61
  -7  -3   7  564.64    2.94
  -6  -8  23   12.55    1.86
  -6  -5  17   78.06    1.87
  -6  -4  14   25.63    1.70
  -6  -3  10  156.69    2.10
  -6  -2   3   56.07    2.13
  -5  -8 -29   11.11    2.31
  -5  -8  24    0.81    1.80
  -5  -7 -27   31.08    2.64
  -5  -6 -25   11.33    2.13
  -5  -3  12   85.86    1.93
  -5  -2   7  925.64    3.77
  -4  -8  25   18.42    1.97
  -4  -4  17    6.00    1.66
  -4  -3 -17   57.95    2.59
  -4  -3  14  129.24    2.03
  -4  -1  -2   62.26    2.93
  -4  -1  -1   14.71    2.60
  -3  -7  24   17.69    1.82
  -3  -6 -26    0.10    1.74
  -3  -4 -21   75.55    2.34
  -3  -3 -18   52.02    2.22
  -3  -2 -14  350.84    3.68
  -3  -1   5  102.77    2.44
  -2  -8  26    5.60    1.94
  -2  -6 -26   16.01    2.22
  -2  -5 -24    1.71    1.78
  -2  -4  19    5.17    1.71
  -2  -2 -15   82.67    2.45
  -2  -2  13  127.33    2.18
  -1  -8 -29   10.82    2.41
  -1  -6 -26   13.14    1.82
  -1  -5 -24   82.75    2.02
  -1  -5  22   85.14    2.37
  -1  -4  20    4.14    2.02
  -1  -3 -19  122.90    2.18
  -1  -2  14   32.26    1.86
   0  -8 -29   25.30    2.02
   0  -6  24    8.27    1.84
   0  -5 -24   90.88    2.06
   0  -3 -19   30.73    1.78
   0  -3  18   16.20    2.13
   0  -2  15  120.28    2.52
   1  -8  27   18.84    2.46
   1  -7 -27    2.74    1.87
   1  -3 -19    8.94    1.70
   1   0  -4  590.77    4.93
   1   0   4  286.17    7.08
   2  -8 -28   11.33    2.00
   2  -6 -25   12.85    1.81
   2  -5 -23    6.92    2.15
   2  -4 -21   84.32    2.01
   2  -4  21   30.83    2.27
   2  -1  12   58.51    2.94
   2   0  -4  117.77    3.31
   3  -7 -26    2.34    1.89
   3  -6 -24   57.21    2.36
   3  -4  21   64.43    2.77
   3  -3 -18  135.20    2.03
   3  -2 -15  206.15    2.28
   3  -2  16   24.37    2.46
   3  -1 -11   15.60    1.84
   3   0  -4  112.85    2.60
   4  -7 -25   16.72    1.98
   4  -6  24    0.75    2.60
   4  -5 -22    2.29    1.76
   4  -3 -17   31.33    2.19
   4  -2 -14    5.17    2.14
   4  -1 -10  539.25    3.33
   4  -1  12  356.45    6.32
   4   0  -3    1.21    2.00
   4   0  -2    1.11    2.50
   4   0   4   31.69    3.23
   5  -7 -24    1.71    1.92
   5  -5 -21    9.54    1.83
   5  -4 -19    3.02    1.72
   5  -3 -16   30.68    2.23
   5  -2 -13    7.41    2.07
   5  -1  -9  350.13    2.68
   6  -7 -23    8.10    1.96
   6  -6 -21   58.64    2.45
   6  -6  23    4.13    3.35
   6  -3 -15   41.05    1.87
   6  -2 -12  100.32    1.96
   6  -1  -7   12.88    2.22
   7  -7 -21   12.09    2.42
   7  -6 -20   29.50    1.99
   7  -5 -18   75.76    2.08
   7  -4 -16    5.43    1.78
   7  -2 -10   12.71    1.78
   7  -1  -5  673.68    3.38
   8  -6 -18    5.86    1.90
   8  -5 -16    5.60    2.29
   8  -4 -14   21.40    1.83
   8  -2  -8  156.88    2.20
   8  -1   0    7.30    1.79
   8  -1   1   83.70    2.14
   8  -1   2  154.01    2.29
   8  -1   3   68.45    2.18
   9  -7 -18    0.01    2.00
   9  -6 -16   18.23    2.02
   9  -5 -14   20.32    2.36
   9  -4 -12  186.55    2.34
   9  -3  -9  102.89    2.08
   9  -2  -4   47.93    1.92
  10  -6 -14   28.72    2.07
  10  -6  17   21.66    3.91
  10  -5 -12    1.87    1.88
  10  -4  -9   12.83    1.86
  10  -3  -5  100.32    2.22
  10  -3   9  174.79    3.28
  11  -7  16    8.85    3.39
  11  -6 -11    2.06    2.00
  11  -6 -10   34.75    2.55
  11  -5  -8   11.00    2.01
  11  -4  -5   27.27    1.92
  11  -4  -4   22.65    2.38
  11  -4   9   67.06    2.61
  12  -6  -6    1.20    2.00
  12  -5  -3   39.68    2.13
  12  -5  -2   25.43    2.52
  12  -5  -1   96.24    2.79
  12  -5   6   11.68    2.52
  12  -5   7   81.17    2.83
 -18 -11  -7    0.46    2.01
 -18 -11  -6   11.30    2.07
 -18 -11  -5    1.40    2.02
 -17 -10 -11   55.72    2.98
 -17 -10 -10    2.29    2.37
 -17 -10  -2    1.22    1.93
 -17 -10  -1   69.13    2.19
 -17 -10   0   -0.40    2.34
 -16 -10   6   19.74    1.96
 -16  -9 -11    2.26    2.24
 -16  -9 -10  212.31    2.78
 -16  -9  -1    0.44    1.85
 -16  -9   0  141.82    2.28
 -15 -10  10   -0.19    1.92
 -15  -9 -17    1.17    2.95
 -15  -9   6    5.98    1.88
 -15  -9   7   51.90    2.44
 -15  -8 -10    9.59    2.17
 -15  -8  -1  136.40    2.29
 -15  -8   0    6.77    1.86
 -14 -10  13   65.66    2.13
 -14  -8   6  105.78    2.11
 -14  -8   7   10.20    2.13
 -14  -7  -9   -0.01    2.36
 -14  -7  -8    4.99    2.11
 -14  -7  -2  157.88    2.23
 -14  -7  -1    4.03    1.73
 -14  -7   0  143.58    2.46
 -13 -10  16    1.80    1.89
 -13  -7 -15   38.35    2.98
 -13  -7   6  107.85    2.06
 -13  -6  -5  143.17    2.50
 -13  -6  -4   74.13    2.30
 -13  -6  -3  151.78    2.50
 -12 -10  18   46.38    2.07
 -12  -9  16    4.65    1.80
 -12  -7  10    0.73    1.72
 -12  -6   5  170.52    2.13
 -11  -9  18    6.40    1.89
 -11  -8  16   19.16    1.81
 -11  -7  13    3.93    1.70
 -11  -6 -17   55.02    4.81
 -11  -5 -11   18.85    2.50
 -11  -5   4  110.46    1.98
 -10  -9 -27    1.69    2.92
 -10  -9  20   20.06    1.89
 -10  -8  18  127.64    2.19
 -10  -5   8   57.45    1.84
 -10  -4  -7  180.08    2.71
 -10  -4   0    4.04    1.65
 -10  -4   1  356.41    2.82
  -9  -9 -28    0.56    2.64
  -9  -6  15    2.61    1.67
  -9  -4   7    0.96    2.01
  -8  -9  23   30.04    2.36
  -8  -8  21   36.26    1.92
  -8  -7  19   46.52    1.82
  -8  -6  17    2.33    1.71
  -8  -5  14   11.35    1.68
  -8  -4  10  142.77    1.95
  -8  -3   3  348.01    2.60
  -8  -3   4  109.86    2.36
  -7  -9  24   -0.75    1.83
  -7  -5  16   27.57    1.74
  -7  -3   8  178.08    2.18
  -6  -9 -30   10.79    2.38
  -6  -9  25    3.28    1.92
  -6  -7  22   79.74    2.38
  -6  -6  20   11.08    1.75
  -6  -2   4   40.52    1.95
  -5  -9  26    3.94    2.36
  -5  -7  23   93.82    2.11
  -5  -6  21   48.70    1.89
  -5  -5  19   14.80    2.09
  -5  -4  16  133.58    1.96
  -5  -3  13   57.49    2.22
  -5  -2   8  371.29    2.94
  -4  -8 -29   37.87    2.04
  -4  -7  24    4.96    2.23
  -4  -6  22   46.01    1.82
  -4  -5 -23    1.45    2.03
  -4  -5  20   69.65    1.93
  -4  -2  10   15.03    1.79
  -4  -1  -3  151.83    3.49
  -4  -1   0   88.85    2.45
  -4  -1   1  208.47    2.86
  -3  -8 -29    4.53    2.30
  -3  -8  26   16.81    2.38
  -3  -6  23   32.36    2.27
  -3  -5  21   74.11    1.88
  -3  -3  16  150.74    2.34
  -3  -2  12  611.55    3.22
  -3  -1   6  459.59    3.32
  -2  -8 -29    0.28    1.82
  -2  -7  25   29.20    1.94
  -2  -3  17   64.92    2.20
  -2  -1   8    2.72    2.03
  -1  -8  27   28.08    2.47
  -1  -6  24   34.34    1.95
  -1  -2 -15   63.38    2.40
  -1  -1  10   63.25    2.61
   0  -8  27    5.86    2.33
   0  -7 -27   29.84    1.98
   0  -7  26    7.24    2.29
   0  -1 -11  454.56    3.38
   0  -1  11   67.45    2.50
   1  -8 -28    4.58    1.90
   1  -7  26    4.52    2.32
   1  -6 -25    3.12    1.80
   1  -5 -23   10.65    2.15
   1  -5  23   49.78    2.31
   1  -4 -21   44.86    1.82
   1  -4  21   34.97    2.23
   1  -1 -11    8.05    2.35
   1   0  -3  190.68    4.43
   2  -8  27   12.70    2.46
   2  -7 -26    9.02    1.93
   2  -7  26    7.09    2.33
   2  -5  23    5.23    2.16
   2  -3 -18  263.91    2.45
   2  -3  19  100.81    2.86
   2  -2 -15  120.78    2.14
   2  -2  16   21.91    2.19
   2  -1 -11   81.44    2.13
   3  -5 -22   64.72    1.96
   3  -5  23   19.97    2.57
   3  -4 -20   82.44    1.97
   3  -3  19  197.21    3.28
   3   0  -3  550.71    4.00
   4  -6 -23    4.93    1.79
   4  -5 -21   11.71    2.20
   4  -4 -19   53.02    1.83
   4  -4  21    3.10    2.79
   4  -2  16    9.85    2.89
   4   0  -1    3.53    2.49
   4   0   3  229.72    4.16
   5  -7  25    1.13    3.07
   5  -6 -22    8.18    1.82
   5  -5 -20   25.29    1.84
   5  -4 -18   13.70    1.78
   6  -7 -22    1.96    1.89
   6  -5 -19   27.62    1.87
   6  -4 -17    7.85    1.77
   6  -2 -11  122.03    2.04
   7  -6 -19   11.17    1.92
   7  -3 -13    3.36    1.74
   7  -2  -9  239.66    2.70
   7  -1  -4  864.30    3.75
   7  -1   7   17.37    2.58
   8  -7 -19   -1.15    1.98
   8  -3 -11   68.40    1.98
   8  -2  -7   28.80    1.80
   9  -7 -17   35.95    2.13
   9  -4 -11   12.84    1.89
   9  -4  15   14.47    3.54
   9  -3  -8  103.11    2.08
   9  -3  12   21.87    2.99
   9  -2  -3  144.76    2.20
   9  -2  -2   31.71    2.31
   9  -2   7  251.57    3.19
  10  -6 -13    2.23    1.95
  10  -5 -11    1.87    1.93
  10  -5  15   29.83    3.51
  10  -4  -8    2.57    1.84
  10  -3  -4    8.79    1.82
  10  -3  -3  189.02    2.65
  10  -3   8   24.43    2.68
  11  -7 -11    2.36    2.53
  11  -6  14    0.35    3.28
  11  -5  -7    3.24    1.89
  11  -5  12    1.04    2.41
  11  -4  -3   10.30    1.90
  11  -4   8    0.85    2.32
  12  -6  -5    9.15    2.07
  12  -6  -4    8.12    2.51
  12  -6  10    2.87    2.57
  12  -5   0   79.00    2.32
  12  -5   1   58.01    2.64
  12  -5   2   71.20    2.74
  12  -5   3    5.10    2.49
  12  -5   4    5.97    2.50
  12  -5   5   44.31    2.65
 -17 -10 -12    1.77    2.35
 -17 -10   1   97.83    2.66
 -16 -10   7    6.70    1.96
 -16  -9 -12  145.98    2.95
 -16  -9   2   64.74    2.47
 -15 -10 -21   -0.56    4.08
 -15 -10  11    8.35    1.95
 -15  -9   8   17.07    2.31
 -15  -8 -11  175.75    2.94
 -15  -8   1   62.80    1.98
 -15  -8   2   11.09    2.25
 -14 -10  14   10.38    1.95
 -14  -9  11    5.50    1.85
 -14  -8   8   71.13    2.36
 -14  -7 -10   61.23    2.32
 -14  -7   1   19.74    1.79
 -14  -7   2   22.31    2.13
 -13  -9  14   73.02    2.12
 -13  -8  11    5.38    1.76
 -13  -7   7   84.09    1.89
 -13  -6  -7   30.10    2.13
 -13  -6  -6   33.15    2.30
 -13  -6  -2   62.79    1.93
 -13  -6  -1  147.81    2.44
 -13  -6   0    5.69    2.09
 -12  -9  17   21.76    2.33
 -12  -8  14    6.87    1.77
 -12  -7  11   10.72    1.76
 -12  -6 -14   59.75    3.39
 -12  -6   6    9.38    1.70
 -11  -9  19   84.96    2.51
 -11  -7  14   22.67    2.10
 -11  -6  10   51.88    1.85
 -11  -5   5   15.23    1.65
 -10  -7 -22   88.13    4.62
 -10  -7  16    2.45    1.71
 -10  -6  13  149.90    2.04
 -10  -5   9  128.40    2.00
 -10  -4  -8    5.15    1.96
 -10  -4   2   24.68    1.76
  -9  -9  22   32.24    2.01
  -9  -8  20    5.55    1.80
  -9  -7  18    2.09    1.70
  -9  -5  12  137.95    1.98
  -8  -7  20    4.23    2.10
  -8  -6 -22    6.56    2.72
  -8  -4  11   27.72    2.01
  -8  -3  -9   88.36    2.87
  -8  -3   5   35.95    2.18
  -7  -8  23   13.00    1.81
  -7  -7  21   13.56    1.78
  -7  -6 -23   46.61    2.90
  -7  -6  19    7.94    1.73
  -7  -4  13   22.92    1.70
  -6  -8 -28   59.59    2.49
  -6  -8  24   11.27    1.83
  -6  -6 -24   54.51    2.39
  -6  -5  18   55.03    1.79
  -6  -4  15  227.81    2.21
  -6  -3 -14  106.45    4.80
  -6  -3  11    0.60    1.70
  -6  -2  -8   47.40    3.63
  -6  -2   5   36.32    1.93
  -5  -9 -30   57.67    2.60
  -5  -8  25   11.05    2.29
  -4  -9 -30   15.93    2.40
  -4  -7 -27   24.86    1.84
  -4  -6 -25    5.66    2.08
  -4  -4 -20    7.24    2.10
  -4  -4  18   12.39    1.69
  -4  -3  15  121.51    2.06
  -4  -2  11   36.27    2.18
  -4  -1  -4  183.70    4.16
  -4  -1   2    2.87    2.05
  -3  -9 -30    0.36    2.36
  -3  -7 -27    1.24    2.20
  -3  -7  25   13.11    2.31
  -3  -5 -23   16.02    2.13
  -3  -4  19  141.23    1.97
  -2  -9 -30   12.72    2.01
  -2  -8  27    1.09    2.41
  -2  -7 -27    3.49    2.21
  -2  -6  24   21.68    2.22
  -2  -5  22    3.93    1.77
  -2  -4 -21  135.09    2.16
  -2  -4  20  195.97    2.59
  -2  -3 -18  447.07    3.47
  -2  -2  14   53.63    2.25
  -2  -1  -9    2.38    2.84
  -1  -7 -27   49.23    2.05
  -1  -7  26    7.42    2.28
  -1  -4 -21    5.18    1.72
  -1  -3  18   13.46    1.74
  -1  -2  15  144.38    2.54
  -1  -1 -10   46.63    2.54
   0  -8 -28    3.04    1.95
   0  -6 -25    3.62    1.82
   0  -5 -23   14.62    2.12
   0  -5  23  103.85    2.48
   0  -4 -21    8.77    1.74
   0  -4  21   70.90    2.32
   0  -2 -15    1.86    1.70
   1  -7 -26    1.89    2.25
   1  -6  25   25.55    2.32
   1  -3 -18   68.76    1.88
   1  -3  19   15.52    2.20
   1  -2 -15   12.88    1.76
   1  -2  16  135.41    2.63
   1  -1  12   13.98    2.22
   2  -8 -27    0.41    1.88
   2  -6 -24   22.21    1.79
   2  -6  25   10.71    2.61
   2  -4 -20   98.60    2.30
   2   0  -3 1549.91    6.78
   3  -8 -26    7.23    1.95
   3  -7 -25   83.25    2.13
   3  -7  26   33.98    2.57
   3  -3 -17  182.28    2.20
   3  -2 -14    2.47    1.76
   3  -1 -10   55.91    2.01
   3   0  -2  174.01    3.38
   4  -8 -25   23.22    2.03
   4  -7 -24   18.89    1.96
   4  -5  23  113.58    3.13
   4  -3 -16   77.10    2.28
   4  -3  19   85.57    3.16
   4  -2 -13  232.10    2.36
   4  -1  -9   11.63    1.81
   4   0   0  102.33    2.51
   4   0   1  288.92    3.75
   4   0   2   86.68    3.07
   5  -8 -24   -0.42    1.94
   5  -7 -23    3.72    1.87
   5  -6  24   13.58    3.06
   5  -3 -15  143.47    2.15
   5  -2 -12  514.28    2.91
   5  -1  -8   41.07    1.88
   6  -6 -20    3.54    1.87
   6  -4  20   13.62    3.89
   6  -3 -14  128.24    2.07
   6  -1  -6    1.07    1.77
   7  -7 -20   17.26    1.98
   7  -4 -15    1.06    1.74
   7  -3 -12    1.58    1.73
   7  -1  -3  496.13    3.04
   7  -1  -2  481.80    3.47
   8  -7 -18   -1.10    1.94
   8  -6 -17    1.34    1.87
   8  -5 -15   51.75    1.95
   8  -4 -13  113.15    2.12
   8  -3 -10  292.96    2.49
   8  -2  -6   75.38    1.97
   9  -6 -15   30.86    2.02
   9  -5 -13   35.06    1.93
   9  -4 -10  146.18    2.24
   9  -3  -7   30.03    1.91
   9  -2  -1  309.67    2.69
   9  -2   0    2.28    2.28
   9  -2   5  136.76    2.71
   9  -2   6   28.47    2.33
  10  -7 -14    6.61    2.00
  10  -6 -12    0.34    1.93
  10  -5 -10   13.47    1.89
  10  -4  -7   18.72    1.94
  10  -4  12    2.62    2.63
  10  -3  -2    4.86    1.87
  10  -3   7  385.80    3.53
  11  -7 -10   96.55    2.85
  11  -6  -9   21.41    2.07
  11  -6  -8   32.66    2.51
  11  -5  -6    5.50    1.95
  11  -4  -2   15.31    1.89
  11  -4  -1    0.38    1.90
  11  -4   0    1.03    2.34
  11  -4   6   13.46    2.39
  11  -4   7    4.58    2.30
  12  -7  -6    1.63    2.15
  12  -6  -3   63.14    2.28
  12  -6   9   47.00    2.84
 -17 -10 -13   19.71    2.47
 -17 -10   2    1.39    1.95
 -17 -10   3   46.33    2.64
 -16 -10 -18    4.31    3.18
 -16 -10   8   18.74    2.00
 -16  -9 -13    4.66    2.64
 -16  -9   3    3.49    1.89
 -15 -10  12    3.43    1.95
 -15  -8 -12    2.41    2.21
 -15  -8   3   -0.26    1.75
 -14  -9  12    9.61    1.88
 -14  -8   9   13.98    2.22
 -14  -7 -11    0.24    2.43
 -14  -7   3   27.59    1.78
 -13  -9  15    0.52    1.84
 -13  -8  12    7.66    1.81
 -13  -7   8   25.17    1.79
 -13  -6  -9    4.28    2.34
 -13  -6  -8   19.64    2.22
 -13  -6   1   53.10    1.80
 -13  -6   2   -0.34    2.11
 -12  -9 -24   11.50    4.44
 -12  -8  15    6.85    1.77
 -12  -7  12   17.66    2.09
 -12  -6   7  144.38    2.10
 -12  -5  -3   81.31    2.24
 -11  -8  17    6.09    1.80
 -11  -6  11    8.24    1.71
 -11  -5 -12   70.08    2.99
 -11  -5   6   44.92    1.82
 -10  -9  21    3.27    1.90
 -10  -8  19    1.52    1.77
 -10  -7  17   20.93    2.23
 -10  -6  14    4.37    1.67
 -10  -5  10  130.46    2.04
 -10  -4  -9   29.85    2.41
 -10  -4   3  274.24    2.37
 -10  -4   4   28.77    2.09
  -9  -8  21    1.94    2.21
  -9  -6  16    2.30    1.68
  -9  -5  13  129.34    1.98
  -9  -4 -13    7.59    3.68
  -9  -4   8   89.51    1.90
  -8  -9  24    4.07    2.43
  -8  -8  22    4.89    1.84
  -8  -6  18   59.73    1.88
  -8  -5  15   17.46    1.67
  -8  -3   6    7.92    2.13
  -7  -9 -29   64.06    2.65
  -7  -5  17  107.89    1.96
  -7  -4  14   17.76    2.09
  -7  -3   9  354.86    2.57
  -6  -7 -26   53.15    2.46
  -6  -7  23   99.34    2.46
  -6  -6  21  180.35    2.58
  -6  -4 -18   13.71    2.67
  -6  -3  12    3.53    1.66
  -6  -2   6  277.46    2.78
  -5  -8 -28   62.70    2.48
  -5  -7  24   -1.62    2.14
  -5  -6  22  125.06    2.15
  -5  -5 -22    0.13    2.10
  -5  -5  20   95.59    2.41
  -5  -4 -19    1.36    2.37
  -5  -4  17   36.40    1.77
  -5  -3  14  180.62    2.54
  -5  -2   9  291.47    2.47
  -4  -8  26   30.82    1.99
  -4  -6  23    7.02    2.18
  -4  -5  21  134.92    2.41
  -4  -2 -12   83.05    3.73
  -4  -1   3    3.68    2.00
  -3  -6 -25    4.95    1.71
  -3  -2  13  105.38    2.02
  -3  -1   7   46.76    2.12
  -2  -7  26    2.29    2.27
  -2  -6 -25   31.65    1.82
  -2  -5 -23   78.54    2.05
  -2  -2 -14  102.82    2.50
  -2  -1   9  224.37    2.71
  -1  -8 -28   27.36    1.99
  -1  -6 -25   59.95    1.99
  -1  -5 -23   15.09    1.83
  -1  -5  23    8.47    2.20
  -1  -4  21   17.77    2.13
  -1  -3 -18  122.36    2.16
   0  -7 -26    1.68    2.20
   0  -6  25    3.06    2.23
   0  -3 -18    2.26    1.67
   0  -3  19   20.78    2.11
   0  -2  16  286.92    3.04
   1  -8 -27    5.07    2.29
   1  -6 -24    9.73    2.14
   1  -4 -20    3.07    2.05
   2  -7 -25   37.83    2.33
   2  -5 -22   27.28    1.79
   2  -3 -17    1.04    2.10
   2  -2 -14  215.78    2.69
   2  -1 -10   -0.18    1.93
   3  -6 -23   20.57    1.84
   3  -6  25   28.21    2.75
   3  -5 -21   24.23    1.84
   3  -4 -19   51.27    1.87
   3   0  -1   70.82    3.13
   4  -7  26   10.52    3.16
   4  -6 -22    4.68    1.74
   4  -5 -20    1.11    2.11
   4  -4 -18    5.31    1.74
   5  -7 -22    9.12    2.23
   5  -6 -21   43.85    1.94
   5  -5 -19   82.34    2.00
   5  -4 -17   59.22    1.91
   5  -1  -7   89.27    2.08
   6  -8 -22    1.91    1.98
   6  -7 -21   32.05    2.00
   6  -5 -18  123.71    2.14
   6  -4 -16  182.92    2.22
   6  -3 -13   13.97    1.78
   6  -2 -10    4.44    1.72
   6  -1  -5  754.29    3.50
   6  -1   9  403.15    5.62
   7  -6 -18   19.53    1.90
   7  -5 -16   28.97    1.87
   7  -4 -14   -0.96    1.69
   7  -3 -11  151.56    2.48
   7  -2  -8   12.08    1.85
   7  -1  -1   98.23    2.18
   7  -1   0   10.89    2.23
   7  -1   6  292.86    3.45
   8  -6 -16    2.15    1.87
   8  -5 -14    2.62    1.83
   8  -4 -12   62.59    2.00
   8  -3  -9   25.12    1.85
   8  -3  14    1.63    3.57
   8  -2  -5    0.99    1.74
   8  -2  10   50.42    2.88
   9  -7 -15   53.29    2.55
   9  -6 -14   21.48    1.97
   9  -5 -12    2.71    1.83
   9  -5  17    3.59    4.05
   9  -4  -9    7.53    2.23
   9  -3  -6    7.27    1.78
   9  -2   1   73.34    2.14
   9  -2   2   38.26    1.95
   9  -2   3    7.07    1.86
   9  -2   4   30.56    1.95
  10  -7 -13    4.66    2.05
  10  -7  18   22.29    4.08
  10  -6 -11   13.85    1.95
  10  -5  -9    1.61    1.83
  10  -4  -6   70.30    2.00
  10  -3  -1  104.54    2.17
  10  -3   0    6.44    1.91
  10  -3   1   11.39    2.29
  10  -3   2    3.74    2.27
  10  -3   4    1.13    2.30
  10  -3   5  206.80    2.93
  10  -3   6   13.04    2.36
  11  -7  -9    1.22    2.48
  11  -7  15    1.11    3.37
  11  -6  -7   31.38    2.52
  11  -5  -5    3.72    1.88
  11  -5  -4    0.79    2.34
  11  -5  11  174.44    3.26
  11  -4   1   45.93    2.04
  11  -4   2    7.74    1.96
  11  -4   3  165.82    2.84
  11  -4   4   17.74    2.39
  11  -4   5  124.75    2.36
  12  -7  -5   28.11    2.27
  12  -7  -4    1.53    2.56
  12  -7  11    9.98    2.72
  12  -6  -2   26.72    2.26
  12  -6  -1   78.77    2.40
  12  -6   0   17.00    2.60
  12  -6   7   46.60    2.74
  12  -6   8    3.82    2.52
 -17 -10   4    4.27    1.94
 -16 -10   9    4.70    1.91
 -16  -9   4    5.91    1.92
 -16  -9   5    7.01    2.31
 -15  -9   9   34.10    1.98
 -15  -8   5   20.22    1.89
 -14  -9  13   25.93    2.00
 -14  -8 -17    5.96    3.08
 -14  -7   4   39.16    1.84
 -13  -8  13   -0.95    1.74
 -13  -7 -16   60.31    3.42
 -13  -7   9   36.51    1.81
 -13  -6   3    0.24    1.66
 -12  -9  18    6.15    1.90
 -12  -6   8   10.80    1.68
 -12  -5  -6   48.84    2.19
 -12  -5  -5  147.16    2.25
 -12  -5  -4  165.03    2.20
 -12  -5  -2  102.14    2.00
 -12  -5  -1   13.79    1.73
 -12  -5   0    0.23    1.71
 -11  -9  20   13.45    1.98
 -11  -8 -23    0.76    3.92
 -11  -8  18   23.77    1.89
[truncated: 1,492,082 more chars]
